# Supplementary material for: Organocatalytic asymmetric azidation of sulfoxonium ylides: mild synthesis of enantioenriched α-azido ketones bearing a labile tertiary stereocenter
Source: Royal Society of Chemistry journal article supplement (doi:10.1039/d2sc03552a), 2022-01-01

Supplementary Information

**Organocatalytic Asymmetric Azidation of Sulfoxonium Ylides: Mild Synthesis of Enantioenriched  $\alpha$ -Azido Ketones Bearing a Labile Tertiary Stereocenter**

Wengang Guo,<sup>1\*</sup> Feng Jiang,<sup>1</sup> Shijia Li,<sup>2,3</sup> and Jianwei Sun<sup>\*2,3</sup>

<sup>1</sup> *Jiangsu Key Laboratory of Advanced Catalytic Materials & Technology, School of Petrochemical Engineering, Changzhou University, Changzhou 213164, China*

<sup>2</sup> *Department of Chemistry and the Hong Kong Branch of Chinese National Engineering Research Centre for Tissue Restoration & Reconstruction, The Hong Kong University of Science and Technology (HKUST), Clear Water Bay, Kowloon, Hong Kong SAR, China*

<sup>3</sup> *Shenzhen Research Institute, HKUST, No. 9 Yuexing 1st Rd, Shenzhen 518057, China*

**Table of Contents**

|                                                                                             |              |
|---------------------------------------------------------------------------------------------|--------------|
| <b>I. General Information .....</b>                                                         | <b>S-2</b>   |
| <b>II. Substrate Preparation .....</b>                                                      | <b>S-3</b>   |
| <b>III. Catalytic Asymmetric Synthesis of Chiral <math>\alpha</math>-Amino Esters .....</b> | <b>S-13</b>  |
| <b>IV. Larger-Scale Reaction and Product Transformations .....</b>                          | <b>S-30</b>  |
| <b>V. Mechanistic Studies .....</b>                                                         | <b>S-34</b>  |
| <b>VI. DFT Calculations .....</b>                                                           | <b>S-42</b>  |
| <b>VII. Determination of the Product Stereochemistry .....</b>                              | <b>S-114</b> |
| <b>NMR Spectra and HPLC Traces</b>                                                          |              |

## I. General Information

Flash column chromatography was performed over silica gel (200-300 mesh) purchased from Qindao Puke Co., China. All air or moisture sensitive reactions were conducted in oven-dried glassware under nitrogen atmosphere using anhydrous solvents. Anhydrous acetonitrile was purified by the Innovative® solvent purification system or purchased from J&K Scientific Ltd. Anhydrous methyl *tert*-butyl ether (MTBE), ZnCl<sub>2</sub> (0.5 M in THF), *s*-BuLi (1.3 M in *n*-hexane), Pd(OAc)<sub>2</sub>, trimethylsulfoxonium iodide, KO<sup>*t*</sup>Bu, aryl bromides, aryl acyl chloride used in this study were purchased from Energy Chemical, and used as received. (+)-Sparteine was purchased from Nanjing Chemlin Chemical Industry Co., Ltd. *N*-Boc-*D*-*tert*-Leucine, 1-pyrenyl bromide, XPhos, and 3,4-Dimethoxy-3-cyclobutene-1,2-dione were purchased from Shanghai Haohong Scientific Co., Ltd (Leyan). Other solvents (such as DCM, MeOH, THF, EA, and *n*-hexane) used in this study all were purchased from commercial sources, and directly used without further purification. <sup>1</sup>H, <sup>13</sup>C and <sup>19</sup>F NMR spectra were collected on a Bruker AV 400 or 300 MHz NMR spectrometer using residue solvent peaks as an internal standard (<sup>1</sup>H NMR: CDCl<sub>3</sub> at 7.26 ppm; <sup>13</sup>C NMR: CDCl<sub>3</sub> at 77.0 ppm). Mass spectra were collected on an Agilent GC/MS 5975C system, a MALDI Micro MX mass spectrometer, or an API QSTAR XL System. Optical rotations were measured on Shanghai Shengguang polarimeter with [α]<sub>D</sub> values reported in degrees. The enantiomeric excess values were determined by chiral HPLC using an Agilent 1260 LC system with a Daicel CHIRALCEL OD-H column, or a Daicel CHIRALPAK AD-H or IC column. Unless otherwise noted, the racemic samples in this study were prepared using the racemic catalyst 1,1'-binaphthyl-2,2'-diyl hydrogenphosphate (20 mol%).

## II. Substrate Preparation

The sulfoxonium ylides were prepared according to a modified literature procedure.<sup>1</sup>

The detailed procedure is shown below.

### General Procedure A.

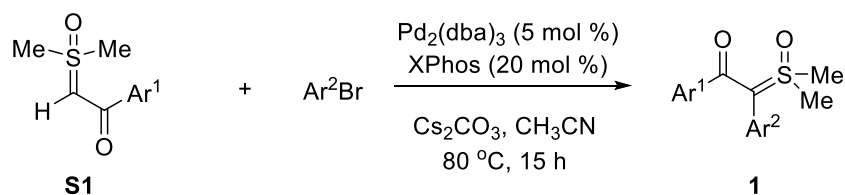

Under  $\text{N}_2$ , to a 100-mL round-bottomed flask equipped with a magnetic stir bar were sequentially added Xphos (477.0 mg, 1.0 mmol, 20 mol%),  $\text{Pd}_2(\text{dba})_3$  (229.0 mg, 0.25 mmol, 5 mol%),  $\text{Cs}_2\text{CO}_3$  (1.8 g, 5.5 mmol, 1.1 equiv), and anhydrous  $\text{CH}_3\text{CN}$  (10.0 mL). The resulting mixture was stirred at room temperature for 10 min followed by addition of the aryl bromide (10.0 mmol, 2.0 equiv) and sulfoxonium ylide **S1** (5.0 mmol, 1.0 equiv). The mixture was then heated with stirring at  $80^\circ\text{C}$ . Upon completion (~ 15 h), the reaction mixture was cooled to room temperature and filtered through a short plug of silica gel, which was washed with  $\text{DCM}/\text{MeOH}$  ( $v/v = 50:1$ , 50 mL). The filtrate was concentrated, and the residue was purified by flash column chromatography on silica gel to afford the desired product sulfoxonium ylide **1**.

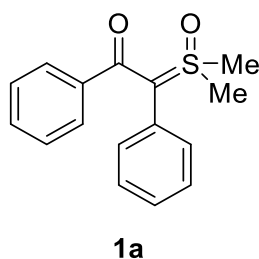

**2-(Dimethyl(oxo)- $\lambda^6$ -sulfanylidene)-1,2-diphenylethan-1-one (1a)** was prepared as a

(1) C. Janot, J. B. Chagnoleau, N. R. Halcovitch, J. Muir, C. Aïssa, *J. Org. Chem.*, **2020**, *85*, 1126–1137.

light brown solid according to the General Procedure A (eluent: DCM/MeOH = 50:1, 0.9 g, 64% yield).

$^1\text{H NMR}$  (300 MHz,  $\text{CDCl}_3$ )  $\delta$  7.37 – 7.34 (m, 2H), 7.24 – 7.10 (m, 8H), 3.6 (s, 6H) ppm.

It's a known compound, and the spectral data are consistent with the literature report.<sup>2</sup>

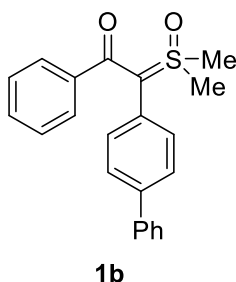

**2-([1,1'-Biphenyl]-4-yl)-2-(dimethyl(oxo)- $\lambda^6$ -sulfanylidene)-1-phenylethan-1-one**

**(1b)** was prepared as a light brown solid according to the General Procedure A (eluent: DCM/MeOH = 50:1, 0.8 g, 47% yield).

$^1\text{H NMR}$  (400 MHz,  $\text{CDCl}_3$ )  $\delta$  7.58 – 7.56 (m, 2H), 7.48 – 7.45 (m, 2H), 7.43 – 7.39 (m, 4H), 7.33 – 7.29 (m, 1H), 7.26 – 7.21 (m, 3H), 7.18 – 7.14 (m, 2H), 3.66 (s, 6H) ppm.

$^{13}\text{C NMR}$  (100 MHz,  $\text{CDCl}_3$ )  $\delta$  183.1, 140.5, 140.1, 139.7, 135.0, 131.1, 129.5, 128.8 (2C), 127.6, 127.3, 127.0, 126.9, 86.4, 43.1 ppm.

**HRMS** (ESI-TOF) Calcd for  $\text{C}_{22}\text{H}_{20}\text{NaO}_2\text{S}$   $[\text{M}+\text{Na}]^+$ : 371.1082, found: 371.1083.

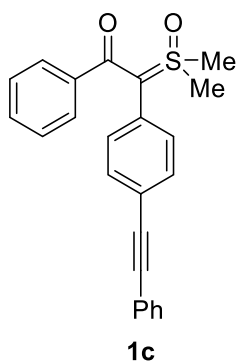

**2-(Dimethyl(oxo)- $\lambda^6$ -sulfanylidene)-1-phenyl-2-(4-(phenylethynyl)phenyl)ethan-1-**

**one (1c)** was prepared as a brown solid according to the General Procedure A (eluent:

---

(2) A. G. Talero, B. S. Martins, A. C. B. Burtoloso, *Org. Lett.*, **2018**, *20*, 7206–7211.

DCM/MeOH = 50:1, 521 mg, 28% yield).

$^1\text{H NMR}$  (400 MHz,  $\text{CDCl}_3$ )  $\delta$  7.51 – 7.49 (m, 2H), 7.38 – 7.36 (m, 4H), 7.35 – 7.32 (m, 3H), 7.26 – 7.23 (m, 1H), 7.19 – 7.12 (m, 4H), 3.64 (s, 6H) ppm.

$^{13}\text{C NMR}$  (100 MHz,  $\text{CDCl}_3$ )  $\delta$  183.3, 140.0, 134.3, 132.3, 131.6, 131.4, 129.6, 128.7, 128.4, 128.3, 127.7, 123.3, 121.7, 90.1, 89.4, 86.3, 43.2 ppm.

**HRMS** (ESI-TOF) Calcd for  $\text{C}_{24}\text{H}_{20}\text{NaO}_2\text{S}$   $[\text{M}+\text{Na}]^+$ : 395.1082, found: 395.1079.

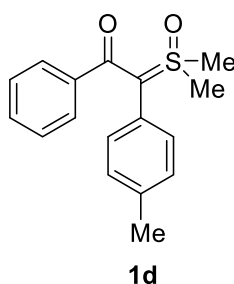

**2-(Dimethyl(oxo)- $\lambda^6$ -sulfanylidene)-1-phenyl-2-(*p*-tolyl)ethan-1-one (1d)** was prepared as a light yellow solid according to the General Procedure A (eluent: DCM/MeOH = 50:1, 650 mg, 45% yield).

$^1\text{H NMR}$  (400 MHz,  $\text{CDCl}_3$ )  $\delta$  7.43 – 7.41 (m, 2H), 7.28 – 7.24 (m, 1H), 7.21 – 7.17 (m, 2H), 7.11 – 7.06 (m, 4H), 3.66 (s, 6H), 2.34 (s, 3H) ppm.

$^{13}\text{C NMR}$  (100 MHz,  $\text{CDCl}_3$ )  $\delta$  182.9, 140.2, 137.3, 134.7, 129.3, 129.2, 128.8, 128.7, 127.5, 86.7, 43.0, 21.3 ppm.

**HRMS** (ESI-TOF) Calcd for  $\text{C}_{17}\text{H}_{18}\text{NaO}_2\text{S}$   $[\text{M}+\text{Na}]^+$ : 309.0925, found: 309.0922.

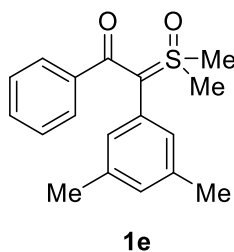

**2-(Dimethyl(oxo)- $\lambda^6$ -sulfanylidene)-2-(3,5-dimethylphenyl)-1-phenylethan-1-one (1e)** was prepared as a light brown solid according to the General Procedure A (eluent: DCM/MeOH = 50:1, 700 mg, 47% yield).

$^1\text{H NMR}$  (400 MHz,  $\text{CDCl}_3$ )  $\delta$  7.41 – 7.38 (m, 2H), 7.26 – 7.19 (m, 1H), 7.16 – 7.12 (m,

2H), 6.86 (s, 1H), 6.80 (s, 2H), 3.61 (s, 6H), 2.21 (s, 6H) ppm.

$^{13}\text{C}$  NMR (75 MHz,  $\text{CDCl}_3$ )  $\delta$  182.7, 140.2, 137.6, 132.7, 131.5, 129.4, 129.3, 128.6, 127.4, 87.2, 43.1, 21.2 ppm.

HRMS (ESI-TOF) Calcd for  $\text{C}_{18}\text{H}_{20}\text{NaO}_2\text{S}$   $[\text{M}+\text{Na}]^+$ : 323.1082, found: 323.1083.

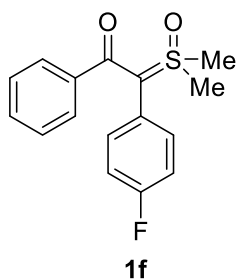

**2-(Dimethyl(oxo)- $\lambda^6$ -sulfanylidene)-2-(4-fluorophenyl)-1-phenylethan-1-one (1f)**

was prepared as a light yellow solid according to the General Procedure A (eluent: DCM/MeOH = 50:1, 610 mg, 42% yield).

$^1\text{H}$  NMR (400 MHz,  $\text{CDCl}_3$ )  $\delta$  7.36 – 7.34 (m, 2H), 7.25 – 7.22 (m, 1H), 7.18 – 7.10 (m, 4H), 6.95 – 6.89 (m, 2H), 3.64 (s, 6H) ppm.

$^{13}\text{C}$  NMR (100 MHz,  $\text{CDCl}_3$ )  $\delta$  183.1, 162.2 (d,  $^1J_{\text{C-F}} = 246$  Hz), 140.0, 136.4 (d,  $^3J_{\text{C-F}} = 8$  Hz), 129.5, 128.6, 127.9 (d,  $^4J_{\text{C-F}} = 3$  Hz), 127.6, 115.3 (d,  $^2J_{\text{C-F}} = 21$  Hz), 85.5, 43.0 ppm.

$^{19}\text{F}$  NMR (282 MHz,  $\text{CDCl}_3$ )  $\delta$  -114.6 ppm.

HRMS (ESI-TOF) Calcd for  $\text{C}_{16}\text{H}_{15}\text{FNaO}_2\text{S}$   $[\text{M}+\text{Na}]^+$ : 313.0674, found: 313.0670.

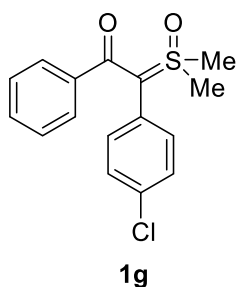

**2-(4-Chlorophenyl)-2-(dimethyl(oxo)- $\lambda^6$ -sulfanylidene)-1-phenylethan-1-one (1g)**

was prepared as a light yellow solid according to the General Procedure A (eluent: DCM/MeOH = 50:1, 580 mg, 38% yield).

$^1\text{H}$  NMR (400 MHz,  $\text{CDCl}_3$ )  $\delta$  7.36 – 7.34 (m, 2H), 7.27 – 7.24 (m, 1H), 7.19 – 7.16 (m,

4H), 7.09 – 7.06 (m, 2H), 3.63 (s, 6H) ppm.

$^{13}\text{C}$  NMR (100 MHz,  $\text{CDCl}_3$ )  $\delta$  183.3, 139.9, 135.8, 133.2, 130.6, 129.6, 128.7, 128.4, 127.7, 85.4, 43.1 ppm.

HRMS (ESI-TOF) Calcd for  $\text{C}_{16}\text{H}_{15}\text{ClNaO}_2\text{S}$   $[\text{M}+\text{Na}]^+$ : 329.0379, found: 329.0377.

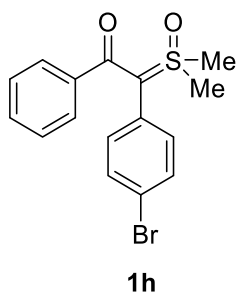

**2-(4-Bromophenyl)-2-(dimethyl(oxo)- $\lambda^6$ -sulfanylidene)-1-phenylethan-1-one (1h)**

was prepared as a light brown solid according to the General Procedure A (eluent: DCM/MeOH = 50:1, 640 mg, 36% yield).

$^1\text{H}$  NMR (300 MHz,  $\text{CDCl}_3$ )  $\delta$  7.37 – 7.31 (m, 4H), 7.28 – 7.15 (m, 3H), 7.02 – 6.99 (m, 2H), 3.64 (s, 6H) ppm.

$^{13}\text{C}$  NMR (75 MHz,  $\text{CDCl}_3$ )  $\delta$  183.3, 139.9, 136.0, 131.4, 131.1, 129.6, 128.7, 127.7, 121.5, 85.5, 43.1 ppm.

HRMS (ESI-TOF) Calcd for  $\text{C}_{16}\text{H}_{15}\text{BrNaO}_2\text{S}$   $[\text{M}+\text{Na}]^+$ : 372.9874, found: 372.9875.

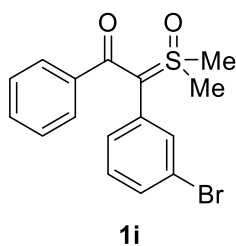

**2-(3-Bromophenyl)-2-(dimethyl(oxo)- $\lambda^6$ -sulfanylidene)-1-phenylethan-1-one (1i)**

was prepared as a brown solid according to the General Procedure A (eluent: DCM/MeOH = 50:1, 460 mg, 26% yield).

$^1\text{H}$  NMR (400 MHz,  $\text{CDCl}_3$ )  $\delta$  7.40 – 7.34 (m, 4H), 7.30 – 7.27 (m, 1H), 7.23 – 7.19 (m, 2H), 7.10 – 7.07 (m, 2H), 3.67 (s, 6H) ppm.

$^{13}\text{C}$  NMR (100 MHz,  $\text{CDCl}_3$ )  $\delta$  183.4, 139.8, 137.0, 134.3, 133.3, 130.1, 129.7, 129.5, 128.7, 127.7, 121.8, 85.7, 43.2 ppm.

HRMS (ESI-TOF) Calcd for  $\text{C}_{16}\text{H}_{15}\text{BrNaO}_2\text{S}$   $[\text{M}+\text{Na}]^+$ : 372.9874, found: 372.9876.

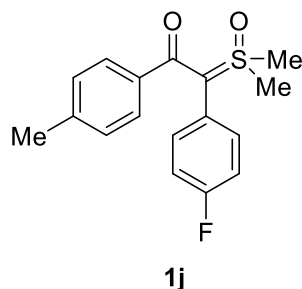

**2-(Dimethyl(oxo)- $\lambda^6$ -sulfanylidene)-2-(4-fluorophenyl)-1-(*p*-tolyl)ethan-1-one (1j)**

was prepared as a yellow solid according to the General Procedure A (eluent: DCM/MeOH = 50:1, 365 mg, 24% yield).

$^1\text{H}$  NMR (300 MHz,  $\text{CDCl}_3$ )  $\delta$  7.27 – 7.24 (m, 2H), 7.15 – 7.11 (m, 2H), 6.99 – 6.88 (m, 4H), 3.60 (s, 6H), 2.26 (s, 3H) ppm.

$^{13}\text{C}$  NMR (75 MHz,  $\text{CDCl}_3$ )  $\delta$  183.0, 162.2 (d,  $^1J_{\text{C-F}} = 246$  Hz), 139.6, 137.1, 136.4 (d,  $^3J_{\text{C-F}} = 8$  Hz), 128.7, 128.3, 128.2 (d,  $^4J_{\text{C-F}} = 3$  Hz), 115.3 (d,  $^2J_{\text{C-F}} = 21$  Hz), 85.2, 43.0, 21.3 ppm.

$^{19}\text{F}$  NMR (282 MHz,  $\text{CDCl}_3$ )  $\delta$  -114.7 ppm.

HRMS (ESI-TOF) Calcd for  $\text{C}_{17}\text{H}_{17}\text{FNaO}_2\text{S}$   $[\text{M}+\text{Na}]^+$ : 327.0831, found: 327.0830.

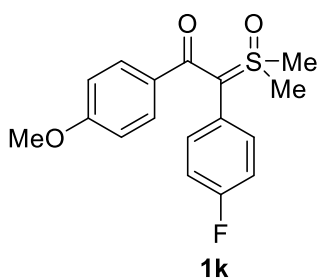

**2-(Dimethyl(oxo)- $\lambda^6$ -sulfanylidene)-2-(4-fluorophenyl)-1-(4-methoxyphenyl)ethan-**

**1-one (1k)** was prepared as a brown solid according to the General Procedure A (eluent: DCM/MeOH = 50:1, 200 mg, 12% yield).

$^1\text{H}$  NMR (300 MHz,  $\text{CDCl}_3$ )  $\delta$  7.35 – 7.31 (m, 2H), 7.17 – 7.12 (m, 2H), 6.97 – 6.91 (m, 2H), 6.70 – 6.66 (m, 2H), 3.76 (s, 3H), 3.62 (s, 6H) ppm.



$^{13}\text{C}$  NMR (75 MHz,  $\text{CDCl}_3$ )  $\delta$  182.4, 162.2 (d,  $^1J_{\text{C-F}} = 246$  Hz), 160.6, 136.4 (d,  $^3J_{\text{C-F}} = 8$  Hz), 132.3, 130.5, 128.2 (d,  $^4J_{\text{C-F}} = 3$  Hz), 115.3 (d,  $^2J_{\text{C-F}} = 21$  Hz), 112.8, 84.7, 55.2, 43.2 ppm.

$^{19}\text{F}$  NMR (282 MHz,  $\text{CDCl}_3$ )  $\delta$  -114.7 ppm.

HRMS (ESI-TOF) Calcd for  $\text{C}_{17}\text{H}_{17}\text{FNaO}_3\text{S}$   $[\text{M}+\text{Na}]^+$ : 343.0780, found: 343.0771.

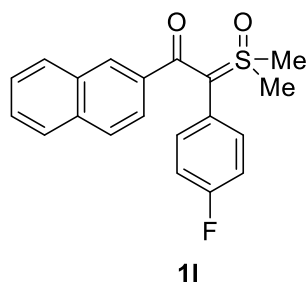

**2-(Dimethyl(oxo)- $\lambda^6$ -sulfanylidene)-2-(4-fluorophenyl)-1-(naphthalen-2-yl)ethan-1-one (11)** was prepared as a light brown solid according to the General Procedure A (eluent: DCM/MeOH = 50:1, 812 mg, 48% yield).

$^1\text{H}$  NMR (400 MHz,  $\text{CDCl}_3$ )  $\delta$  7.96 (s, 1H), 7.79 – 7.73 (m, 2H), 7.64 (d,  $J = 8.6$  Hz, 1H), 7.51 – 7.43 (m, 3H), 7.22 – 7.19 (m, 2H), 6.97 – 6.92 (m, 2H), 3.70 (s, 6H) ppm.

$^{13}\text{C}$  NMR (75 MHz,  $\text{CDCl}_3$ )  $\delta$  182.8, 162.2 (d,  $^1J_{\text{C-F}} = 246$  Hz), 137.4, 136.5 (d,  $^3J_{\text{C-F}} = 8$  Hz), 133.8, 132.6, 129.0, 128.8, 127.9 (d,  $^4J_{\text{C-F}} = 3$  Hz), 127.5, 127.0, 126.8, 126.0, 125.9, 115.4 (d,  $^2J_{\text{C-F}} = 21$  Hz), 85.9, 43.0 ppm.

$^{19}\text{F}$  NMR (376 MHz,  $\text{CDCl}_3$ )  $\delta$  -114.4 ppm.

HRMS (ESI-TOF) Calcd for  $\text{C}_{20}\text{H}_{17}\text{FNaO}_3\text{S}$   $[\text{M}+\text{Na}]^+$ : 363.0831, found: 363.0831.

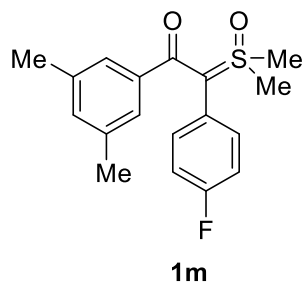

**2-(dimethyl(oxo)- $\lambda^6$ -sulfanylidene)-1-(3,5-dimethylphenyl)-2-(4-fluorophenyl)ethan-1-one (1m)** was prepared as a light brown solid according to the General Procedure A (eluent: DCM/MeOH = 50:1, 580 mg, 36% yield).

$^1\text{H NMR}$  (300 MHz,  $\text{CDCl}_3$ )  $\delta$  7.15 – 7.10 (m, 2H), 6.96 – 6.86 (m, 5H), 3.58 (s, 6H), 2.14 (s, 6H) ppm.

$^{13}\text{C NMR}$  (100 MHz,  $\text{CDCl}_3$ )  $\delta$  183.4, 162.1 (d,  $^1J_{\text{C-F}} = 246$  Hz), 139.9, 136.9, 136.4 (d,  $^3J_{\text{C-F}} = 8$  Hz), 131.1, 128.2 (d,  $^4J_{\text{C-F}} = 3$  Hz), 126.5, 115.1 (d,  $^2J_{\text{C-F}} = 21$  Hz), 85.5, 42.9, 21.1 ppm.

$^{19}\text{F NMR}$  (282 MHz,  $\text{CDCl}_3$ )  $\delta$  -114.8 ppm.

**HRMS** (ESI-TOF) Calcd for  $\text{C}_{18}\text{H}_{19}\text{FNaO}_2\text{S}$   $[\text{M}+\text{Na}]^+$ : 341.0987, found: 341.0989.

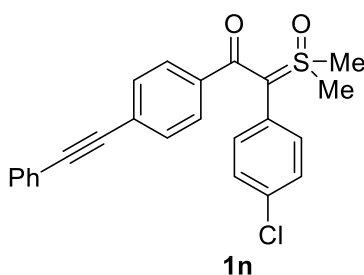

**2-(4-Chlorophenyl)-2-(dimethyl(oxo)- $\lambda^6$ -sulfanylidene)-1-(4-**

**(phenylethynyl)phenyl)ethan-1-one (1n)** was prepared as a light brown powder according to the General Procedure A (eluent: DCM/MeOH = 50:1, 300 mg, 15% yield)

$^1\text{H NMR}$  (300 MHz,  $\text{CDCl}_3$ )  $\delta$  7.51 – 7.48 (m, 2H), 7.34 – 7.31 (m, 7H), 7.21 – 7.18 (m, 2H), 7.09 – 7.06 (m, 2H), 3.63 (s, 6H) ppm.

$^{13}\text{C NMR}$  (75 MHz,  $\text{CDCl}_3$ )  $\delta$  182.2, 139.5, 135.7, 133.5, 131.6, 130.9, 130.3, 128.7, 128.6, 128.44, 128.38, 124.4, 123.0, 90.8, 89.1, 86.0, 43.0 ppm.

**HRMS** (ESI-TOF) Calcd for  $\text{C}_{24}\text{H}_{19}\text{ClNaO}_2\text{S}$   $[\text{M}+\text{Na}]^+$ : 429.0692, found: 429.0689.

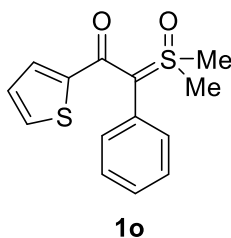

**2-(Dimethyl(oxo)- $\lambda^6$ -sulfanylidene)-2-phenyl-1-(thiophen-2-yl)ethan-1-one (1o)** was prepared as a light brown solid according to the General Procedure A (eluent: DCM/MeOH = 50:1, 1.0 g, 76% yield).

$^1\text{H NMR}$  (300 MHz,  $\text{CDCl}_3$ )  $\delta$  7.42 – 7.35 (m, 5H), 7.28 – 7.26 (m, 1H), 6.79 – 6.76 (m,

1H), 6.59 – 6.58 (m, 1H), 3.62 (s, 6H) ppm.

<sup>13</sup>C NMR (75 MHz, CDCl<sub>3</sub>) δ 173.8, 145.9, 135.8, 131.1, 129.3, 129.0, 128.9, 128.8, 127.0, 85.5, 43.3 ppm.

HRMS (ESI-TOF) Calcd for C<sub>14</sub>H<sub>14</sub>NaO<sub>2</sub>S<sub>2</sub> [M+Na]<sup>+</sup>: 301.0333, found: 301.0321.

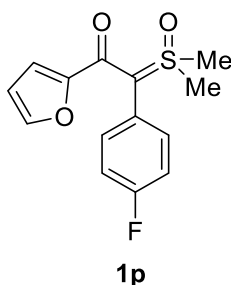

**2-(Dimethyl(oxo)-λ<sup>6</sup>-sulfanylidene)-2-(4-fluorophenyl)-1-(furan-2-yl)ethan-1-one**

**(1p)** was prepared as a light brown solid according to the General Procedure A (eluent: DCM/MeOH = 50:1, 0.9 g, 64% yield).

<sup>1</sup>H NMR (300 MHz, CDCl<sub>3</sub>) δ 7.33 – 7.25 (m, 3H), 7.10 – 7.03 (m, 2H), 6.23 – 6.21 (m, 1H), 5.90 – 5.88 (m, 1H), 3.62 (s, 6H) ppm.

<sup>13</sup>C NMR (75 MHz, CDCl<sub>3</sub>) δ 170.6, 163.0 (d, <sup>1</sup>J<sub>C-F</sub> = 247 Hz), 152.2, 143.5, 137.1 (d, <sup>3</sup>J<sub>C-F</sub> = 8 Hz), 126.8 (d, <sup>4</sup>J<sub>C-F</sub> = 3 Hz), 115.7 (d, <sup>2</sup>J<sub>C-F</sub> = 21 Hz), 113.9, 110.9, 83.9, 43.2 ppm.

<sup>19</sup>F NMR (282 MHz, CDCl<sub>3</sub>) δ –113.0 ppm.

HRMS (ESI-TOF) Calcd for C<sub>14</sub>H<sub>13</sub>FNaO<sub>2</sub>S [M+Na]<sup>+</sup>: 303.0467, found: 303.0453.

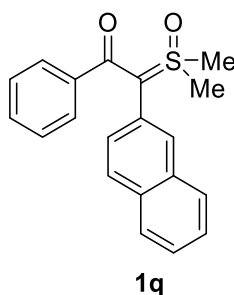

**2-(Dimethyl(oxo)-λ<sup>6</sup>-sulfanylidene)-2-(naphthalen-2-yl)-1-phenylethan-1-one (1q)**

was prepared as a light brown solid according to the General Procedure A (eluent: DCM/MeOH = 50:1, 630 mg, 39% yield).

<sup>1</sup>H NMR (400 MHz, CDCl<sub>3</sub>) δ 7.82 – 7.79 (m, 1H), 7.77 – 7.71 (m, 3H), 7.49 – 7.44 (m,

4H), 7.29 – 7.27 (m, 1H), 7.24 – 7.20 (m, 1H), 7.16 – 7.12 (m, 2H), 3.71 (s, 6H) ppm.

$^{13}\text{C}$  NMR (100 MHz,  $\text{CDCl}_3$ )  $\delta$  183.3, 140.1, 133.5, 133.4, 132.6, 132.4, 129.53, 129.50, 128.7, 128.0, 127.7, 127.61, 127.56, 126.1, 125.9, 87.0, 43.2 ppm.

HRMS (ESI-TOF) Calcd for  $\text{C}_{20}\text{H}_{18}\text{NaO}_2\text{S}$   $[\text{M}+\text{Na}]^+$ : 345.0925, found: 345.0924.

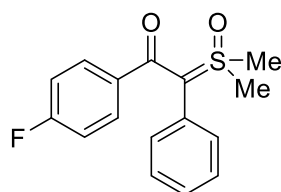

**1r**

**2-(Dimethyl(oxo)- $\lambda^6$ -sulfanylidene)-1-(4-fluorophenyl)-2-phenylethan-1-one (1r)**

was prepared as a light brown solid according to the General Procedure A (eluent: DCM/MeOH = 50:1, 510 mg, 35% yield).

$^1\text{H}$  NMR (400 MHz,  $\text{CDCl}_3$ )  $\delta$  7.41 – 7.38 (m, 2H), 7.30 – 7.26 (m, 3H), 7.21 – 7.18 (m, 2H), 6.87 – 6.83 (m, 2H), 3.66 (s, 6H) ppm.

$^{13}\text{C}$  NMR (75 MHz,  $\text{CDCl}_3$ )  $\delta$  181.7, 163.2 (d,  $^1J_{\text{C-F}} = 248$  Hz), 136.2 (d,  $^4J_{\text{C-F}} = 3$  Hz), 134.8, 131.9, 130.8 (d,  $^3J_{\text{C-F}} = 9$  Hz), 128.4, 127.5, 114.4 (d,  $^2J_{\text{C-F}} = 21$  Hz), 86.8, 43.0 ppm.

$^{19}\text{F}$  NMR (282 MHz,  $\text{CDCl}_3$ )  $\delta$  -111.2 ppm.

HRMS (ESI-TOF) Calcd for  $\text{C}_{16}\text{H}_{15}\text{FNaO}_2\text{S}$   $[\text{M}+\text{Na}]^+$ : 313.0674, found: 313.0672.

### III. Catalytic Asymmetric Synthesis of Chiral $\alpha$ -Amino Esters

**Table S1. Screening of CPAs for the H-N<sub>3</sub> Insertion Reaction.**

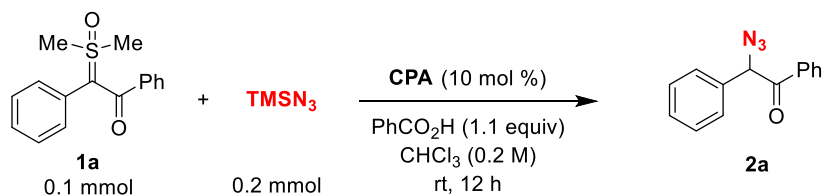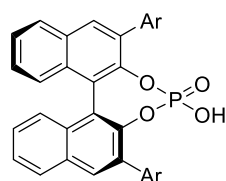

Ar = 9-anthryl, **CPA1**  
 Ar = 9-((10-Ph)-anthracenyl), **CPA3**  
 Ar = TRIP, **CPA4**  
 Ar = 1-pyrenyl, **CPA5**  
 Ar = 2,6-Me<sub>2</sub>-4-*t*Bu-C<sub>6</sub>H<sub>2</sub>, **CPA6**

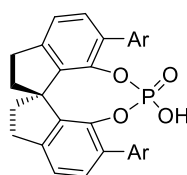

Ar = 9-anthryl, **CPA2**  
 Ar = 9-phenanthracenyl, **CPA7**  
 Ar = 9-((10-Ph)-anthracenyl), **CPA8**  
 Ar = 1-pyrenyl, **CPA9**  
 Ar = 2,4,6-Me<sub>3</sub>-C<sub>6</sub>H<sub>2</sub>, **CPA10**

| entry | CPA          | yield (%) <sup>a</sup> | ee (%) <sup>b</sup> |
|-------|--------------|------------------------|---------------------|
| 1     | <b>CPA1</b>  | >95                    | 0                   |
| 2     | <b>CPA2</b>  | >95                    | 0                   |
| 3     | <b>CPA3</b>  | >95                    | 0                   |
| 4     | <b>CPA4</b>  | >95                    | 0                   |
| 5     | <b>CPA5</b>  | >95                    | 0                   |
| 6     | <b>CPA6</b>  | >95                    | 0                   |
| 7     | <b>CPA7</b>  | >95                    | 0                   |
| 8     | <b>CPA8</b>  | 52                     | 0                   |
| 9     | <b>CPA9</b>  | >95                    | 0                   |
| 10    | <b>CPA10</b> | >95                    | 0                   |

<sup>a</sup> Determined by crude <sup>1</sup>H NMR analysis using CH<sub>2</sub>Br<sub>2</sub> as an internal standard. All the reactions described above provided clean conversion. <sup>b</sup> Determined by Chiral HPLC analysis.

**Table S2. Screening of Chiral Hydrogen Bonding Organocatalysts.**

$\text{1a}$  (0.1 mmol) +  $\text{TMSN}_3$  (0.2 mmol)  $\xrightarrow[\text{rt, 24-36 h}]{\text{TU (10 mol \%), PhCO}_2\text{H (1.1 equiv), CHCl}_3 (0.2 \text{ M})}$   $\text{2a}$

---

**TU1**

**TU2**

**TU3**

**TU4**

**TU5**

**TU6**

**TU7**

**TU8**

**TU9**

**TU10**

| entry          | TU          | yield (%) <sup>a</sup> | ee (%) <sup>b</sup> |
|----------------|-------------|------------------------|---------------------|
| 1              | <b>TU1</b>  | >95                    | 0                   |
| 2              | <b>TU2</b>  | >95                    | 0                   |
| 3              | <b>TU3</b>  | >95                    | 0                   |
| 4 <sup>c</sup> | <b>TU4</b>  | <20                    | 0                   |
| 5 <sup>c</sup> | <b>TU5</b>  | <20                    | 0                   |
| 6 <sup>c</sup> | <b>TU6</b>  | <20                    | 14                  |
| 7              | <b>TU7</b>  | >95                    | 0                   |
| 8              | <b>TU8</b>  | >95                    | 0                   |
| 9              | <b>TU9</b>  | >95                    | 40                  |
| 10             | <b>TU10</b> | >95                    | 52                  |

<sup>a</sup> Determined by crude <sup>1</sup>H NMR analysis using CH<sub>2</sub>Br<sub>2</sub> as an internal standard. <sup>b</sup> Determined by Chiral HPLC analysis. <sup>c</sup> The reaction gave a messy mixture, likely due to the incompatibility of the reaction with the basic cinchona alkaloid functionality.

**Table S3. Screening of other Chiral Proton Sources.**

Reaction scheme: **1a** (0.1 mmol) + **TMSN<sub>3</sub>** (0.2 mmol)  $\xrightarrow[\text{CHCl}_3 (0.2 \text{ M}), \text{rt}, 24 \text{ h}]{\text{SQ3 (10 mol\%)}, \text{N-Boc-aminoacid (1.1 equiv)}}$  **2a**

Screened N-Boc-amino acids: *N*-Boc-L-Proline, *N*-Boc-D-Proline, *N*-Boc-L-Leucine, *N*-Boc-D-Leucine, *N*-Boc-L-tert-Leucine, *N*-Boc-D-tert-Leucine, *N*-Boc-L-Valine, *N*-Boc-D-Valine

| entry          | <i>N</i> -Boc-AminoAcids     | conv. (%) <sup>a</sup> | ee (%) <sup>b</sup> |
|----------------|------------------------------|------------------------|---------------------|
| 1              | <i>N</i> -Boc-L-Proline      | >95                    | 71                  |
| 2              | <i>N</i> -Boc-D-Proline      | >95                    | 71                  |
| 3 <sup>c</sup> | <i>N</i> -Boc-L-Proline      | >95                    | 71                  |
| 4 <sup>c</sup> | <i>N</i> -Boc-D-Proline      | >95                    | 71                  |
| 5              | <i>N</i> -Boc-L-Leucine      | >95                    | 71                  |
| 6              | <i>N</i> -Boc-D-Leucine      | >95                    | 71                  |
| 7              | <i>N</i> -Boc-L-tert-Leucine | >95                    | 71                  |
| 8              | <i>N</i> -Boc-D-tert-Leucine | >95                    | 71                  |
| 9              | <i>N</i> -Boc-L-Valine       | >95                    | 71                  |
| 10             | <i>N</i> -Boc-D-Valine       | >95                    | 71                  |

<sup>a</sup> Determined by crude <sup>1</sup>H NMR analysis using CH<sub>2</sub>Br<sub>2</sub> as an internal standard. <sup>b</sup> Determined by chiral HPLC analysis. <sup>c</sup> *ent*-SQ3 was used as the catalyst.

## Synthesis of *ent*-SQ3

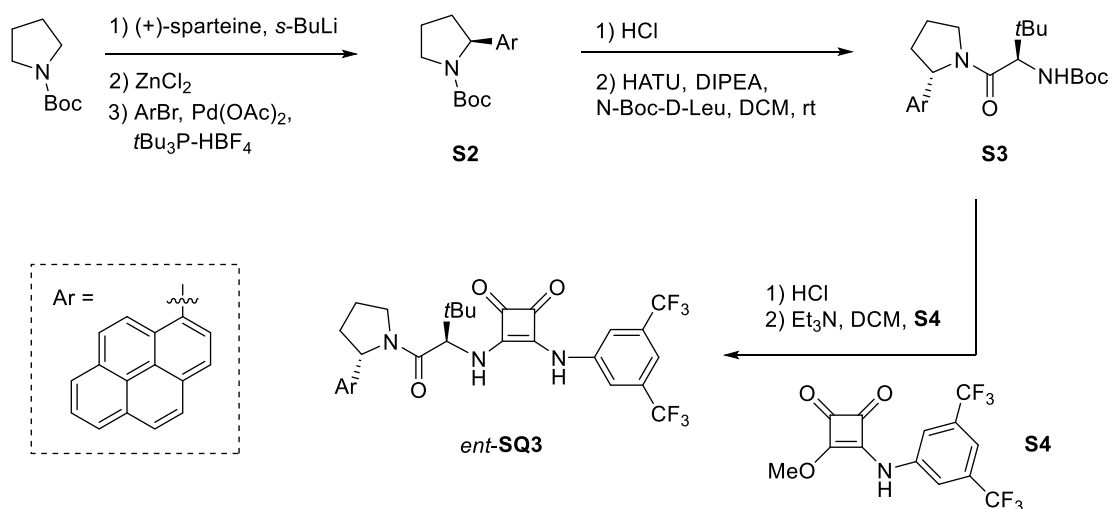

*tert*-Butyl (S)-2-(pyren-1-yl)pyrrolidine-1-carboxylate (**S2**) was prepared according to a modified literature procedure.<sup>3</sup> To a solution of *N*-Boc-pyrrolidine (2.0 g, 11.4 mmol, 1.7 equiv) and (+)-sparteine (2.7 g, 11.4 mmol, 1.7 equiv) in anhydrous methyl *tert*-butyl ether (MTBE, 24 mL) at  $-78$  °C was added *s*-BuLi (8.8 mL, 1.3 M in *n*-hexane, 11.4 mmol, 1.7 equiv) dropwise, with the temperature kept below  $-68$  °C. During addition, the color of the mixture gradually changed from pale yellow to orange. The resulting solution was stirred at  $-74$  °C for 3 h. A solution of ZnCl<sub>2</sub> in THF (13.6 mL, 0.5 M, 6.8 mmol, 1.0 equiv) was slowly added to the reaction mixture with rapid stirring and the temperature kept below  $-68$  °C. The resulting light suspension was stirred at  $-74$  °C for 30 min before it was warmed to room temperature. The resulting homogeneous solution was stirred for 30 min at room temperature, at which point a slightly turbid solution was obtained. Then, 1-bromopyrene (2.7 g, 9.5 mmol, 1.4 equiv) was added in one portion, followed by Pd(OAc)<sub>2</sub> (102 mg, 0.46 mmol, 7 mol%) and tBu<sub>3</sub>P·HBF<sub>4</sub> (166 mg, 0.58 mmol, 8 mol%). The mixture was stirred at the same temperature for 24 h, during which time zinc salts were precipitated. Then, an aqueous ammonia (0.7 mL, 25 wt%) was carefully added into the reaction mixture to

(3) (a) K. R. Campos, A. Klapars, J. H. Waldman, P. G. Dormer, C.-Y. Chen, *J. Am. Chem. Soc.*, **2006**, *128*, 3538–3539; (b) S. M. Banik, A. Levina, A. M. Hyde, E. N. Jacobsen, *Science*, **2017**, *358*, 761–764; (c) M. R. Netherton, G. C. Fu, *Org. Lett.*, **2001**, *3*, 4295–4298.



quench and facilitate filtration of the reaction mixture. The resulting suspension was stirred for an additional hour at room temperature before it was filtered through a plug of celite. The filter cake was washed with MTBE (50 mL). The combined organic solutions were washed with an aqueous solution of HCl (1 M, 50 mL) and brine sequentially, and then dried over Na<sub>2</sub>SO<sub>4</sub>, filtered, and concentrated. After purification by column chromatography on silica gel (eluent: *n*-hexane to EtOAc/*n*-hexane = 2:3), the desired product **S2** was obtained as a light yellow solid (1.0 g, 40% yield, 98% ee). This intermediate was obtained as a mixture of rotamers at 2:1 ratio.

<sup>1</sup>H NMR (300 MHz, CDCl<sub>3</sub>) was integrated based on the sum of hydrogen atoms: δ 8.29 – 8.26 (m, 1H), 8.19 – 8.08 (m, 4H), 8.04 – 8.00 (m, 3H), 7.85 – 7.83 (m, 1H), 6.06 – 5.89 (m, 1H), 3.93 – 3.67 (m, 2H), 2.62 – 2.59 (m, 1H), 2.03 – 1.95 (m, 3H), 1.51 – 1.01 (m, 9H) ppm.

[α]<sub>D</sub><sup>25</sup>: –54.2 (*c* = 1.0, CHCl<sub>3</sub>). HPLC analysis of the product: Daicel CHIRALPAK® OJ-H column; 5% *i*-PrOH in *n*-hexane; 1.0 mL/min; retention times: 19.7 min (major), 10.8 min (minor).

Note: The spectra data are consistent with literature report.<sup>3b</sup>

***tert*-Butyl ((*R*)-3,3-dimethyl-1-oxo-1-((*S*)-2-(pyren-1-yl)pyrrolidin-1-yl)butan-2-yl)carbamate (S3)**. At room temperature, pyrrolidine **S2** (1.0 g, 2.7 mmol, 1.0 equiv) was treated with a solution of HCl in 1,4-dioxane (5.4 mL, 4.0 M, 21.6 mmol, 8.0 equiv). The resulting mixture was stirred at the same temperature for 2 h, and concentrated at reduced pressure to yield a beige foam. The obtained amine hydrochloride was then dissolved in anhydrous DCM (10 mL), to which anhydrous diisopropylethylamine (DIPEA, 349 mg, 2.7 mmol, 1.0 equiv) was added in one portion. The reaction mixture was stirred at room temperature for 30 min to liberate the free amine.

To a solution of *N*-Boc-*D*-*tert*-Leucine (812 mg, 3.5 mmol, 1.3 equiv) and HATU (1.2 g, 3.5 mmol, 1.3 equiv) in anhydrous DCM (10 mL) was added DIPEA (1.0 g, 8.1 mmol, 3.0 equiv). The suspension was stirred at room temperature for 20 min. Then, the solution of the free amine was slowly added into the solution of the activated *N*-

Boc-D-Leucine. The reaction mixture was stirred at room temperature for 48 h before water (20 mL) was added to quench the reaction. The mixture was extracted with EtOAc (3 × 20 mL), and the combined organic layers were washed with an aqueous HCl solution (1.0 M, 20 mL), brine, and dried over Na<sub>2</sub>SO<sub>4</sub>, filtered, and evaporated in *vacuo*. The crude product was directly used for the next step without further purification.

**3-((3,5-Bis(trifluoromethyl)phenyl)amino)-4-(((R)-3,3-dimethyl-1-oxo-1-((S)-2-(pyren-1-yl)pyrrolidin-1-yl)butan-2-yl)amino)cyclobut-3-ene-1,2-dione (*ent*-SQ3).**<sup>4</sup>

To a solution of **S3** (2.7 mmol, 1.0 equiv) in anhydrous DCM (5 mL) was added a solution of HCl in 1,4-dioxane (5.4 mL, 4.0 M, 21.6 mmol, 8.0 equiv). The reaction mixture was stirred at room temperature for 2 h. The mixture was concentrated under reduce pressure to afford the amine hydrochloride.

The residue was then dissolved in anhydrous DCM (10 mL), and treated with triethylamine (1.1 mL, 8.1 mmol, 3.0 equiv) in one portion. The mixture was stirred at room temperature for 30 min to liberate the free amine. **S4** (916 mg, 2.7 mmol, 1.0 equiv) was then added, and the reaction mixture was stirred at room temperature for 48 h. Upon completion, the volatiles were removed under reduced pressure, and the residue was purified by flash column chromatography on silica gel (eluent: *n*-hexane/EtOAc = 3:1 to 2:3) to afford the desired product as a light yellow solid (1.1 g, 58% yield over two steps).

Note: *ent*-**SQ3** was obtained as a mixture of rotamers at 7:1 ratio.

<sup>1</sup>H NMR (300 MHz, DMSO-*d*<sub>6</sub>) was integrated based on the sum of hydrogen atoms: δ 10.36 (br, 1H), 8.52 – 8.02 (m, 11H), 7.83 – 7.57 (m, 2H), 6.47 – 6.14 (m, 1H), 5.20 (s, 1H), 4.31 – 3.93 (m, 2H), 2.59 (m, 1H), 2.02 – 1.90 (m, 3H), 1.07 (s, 9H) ppm.

<sup>13</sup>C NMR (75 MHz, DMSO-*d*<sub>6</sub>, major and minor rotamer resonances) δ 185.0, 181.0, 169.6, 168.5, 163.1, 141.5, 137.2, 132.0, 131.6, 131.3, 130.6, 129.9, 127.7, 127.1, 126.9, 126.6,

---

(4) W. Yang, D.-M. Du, *Org. Lett.*, **2010**, *12*, 5450–5453.

125.6, 125.5, 125.1, 124.7, 124.5, 123.4, 122.8, 122.6, 121.8, 118.4, 115.2, 61.9, 58.8, 48.8, 36.2, 35.8, 34.0, 26.5, 26.2, 23.9 ppm.

$^{19}\text{F}$  NMR (282 MHz, DMSO- $d_6$ , major and minor rotamer resonances)  $\delta$  -61.8, -61.9 ppm.

HRMS (ESI-TOF) Calcd for  $\text{C}_{38}\text{H}_{31}\text{F}_6\text{N}_3\text{NaO}_3$   $[\text{M}+\text{Na}]^+$ : 714.2167, found: 714.2166.

$[\alpha]_D^{25}$ : -43.0 ( $c = 1.0$ ,  $\text{CHCl}_3$ ).

The  $^{13}\text{C}$  NMR data are consistent with the literature report.<sup>3b</sup>

### General Procedure B.

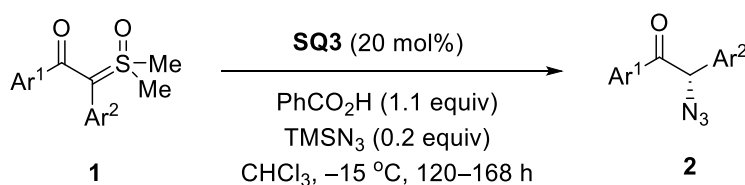

An oven-dried 4-mL vial equipped with a magnetic stirring bar was charged with sulfoxonium ylide **1** (0.2 mmol, 1.0 equiv), benzoic acid (0.22 mmol, 1.1 equiv), catalyst **SQ3** (27.6 mg, 0.04 mmol, 20 mol%), and  $\text{CHCl}_3$  (1.0 mL). The vial was carefully sealed with a puncturable screw-cap and electric tape before it was cooled to  $-15^\circ\text{C}$ . The solution was stirred at the same temperature for 5 min before  $\text{TMSN}_3$  (52.6  $\mu\text{L}$ , 0.4 mmol, 2.0 equiv) was added by microsyringe. Then, the mixture was stirred at the same temperature and the reaction progress was monitored by TLC. Upon completion, the mixture was directly subjected to flash column chromatography on silica gel (eluent: *n*-hexane/EtOAc = 20:1) to give the desired product **2**.

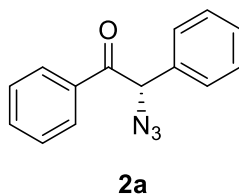

(*S*)-2-Azido-1,2-diphenylethan-1-one was prepared as a light yellow oil according to the General Procedure B (120 h, 39.4 mg, 83% yield, 90% ee).

$[\alpha]_D^{25}$ : +145.1 ( $c = 2.0$ ,  $\text{CHCl}_3$ ). HPLC analysis of the product: Daicel CHIRALPAK® OD-

H column; 1% *i*-PrOH in *n*-hexane; 0.5 mL/min; retention times: 29.3 min (major), 45.7 min (minor).

$^1\text{H NMR}$  (400 MHz,  $\text{CDCl}_3$ )  $\delta$  7.88 (d,  $J = 7.4$  Hz, 2H), 7.50 (t,  $J = 7.4$  Hz, 1H), 7.39 – 7.35 (m, 7H), 5.73 (s, 1H) ppm.

$^{13}\text{C NMR}$  (100 MHz,  $\text{CDCl}_3$ )  $\delta$  194.4, 134.3, 133.8 (two C), 129.6, 129.4, 128.9, 128.8, 128.3, 67.9 ppm.

**HRMS** (ESI-TOF) Calcd for  $\text{C}_{14}\text{H}_{11}\text{N}_3\text{NaO}$   $[\text{M}+\text{Na}]^+$ : 260.0800, found: 260.0796.

This is a known compound, the spectra data are consistent with those in the previous report.<sup>5</sup>

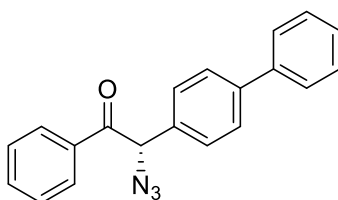

**2b**

**(S)-2-([1,1'-Biphenyl]-4-yl)-2-azido-1-phenylethan-1-one (2b)** was prepared as a white solid according to the General Procedure B (120 h, 60.2 mg, 96% yield, 85% ee).  $[\alpha]_D^{25}$ : +133.0 ( $c = 2.0$ ,  $\text{CHCl}_3$ ). HPLC analysis of the product: Daicel CHIRALPAK® IC column; 3% *i*-PrOH in *n*-hexane; 1.0 mL/min; retention times: 13.3 min (major), 15.5 min (minor).

$^1\text{H NMR}$  (400 MHz,  $\text{acetone-}d_6$ )  $\delta$  7.90 (d,  $J = 8.3$  Hz, 2H), 7.56 (d,  $J = 8.0$  Hz, 2H), 7.48 – 7.41 (m, 5H), 7.33 – 7.26 (m, 4H), 7.21 – 7.17 (m, 1H), 6.11 (s, 1H) ppm.

$^{13}\text{C NMR}$  (100 MHz,  $\text{acetone-}d_6$ )  $\delta$  194.5, 141.8, 139.8, 134.6, 133.9, 133.4, 129.1, 128.94, 128.91, 128.88, 127.9, 127.8, 126.9, 66.9 ppm.

**HRMS** (ESI-TOF) Calcd for  $\text{C}_{20}\text{H}_{15}\text{N}_3\text{NaO}$   $[\text{M}+\text{Na}]^+$ : 336.1113, found: 336.1106.

---

(5) (a) W. Wei, H. Cui, H. Yue, D. Yang, *Green Chem.*, **2018**, *20*, 3197–3202; (b) M. I. Hussain, Y. Feng, L. Hu, Q. Deng, X. Zhang, Y. Xiong, *J. Org. Chem.*, **2018**, *83*, 7852–7859.

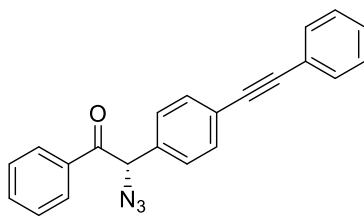

**2c**

**(S)-2-Azido-1-phenyl-2-(4-(phenylethynyl)phenyl)ethan-1-one (2c)** was prepared as a white solid according to the General Procedure B (120 h, 59.4 mg, 88% yield, 90% ee).  $[\alpha]_D^{25}$ : +119.8 ( $c = 2.0$ ,  $\text{CHCl}_3$ ). HPLC analysis of the product: Daicel CHIRALPAK® OD-H column; 3% *i*-PrOH in *n*-hexane; 1.0 mL/min; retention times: 16.7 min (major), 20.7 min (minor).

$^1\text{H NMR}$  (400 MHz, acetone- $d_6$ )  $\delta$  8.06 (d,  $J = 7.6$  Hz, 2H), 7.66 – 7.62 (m, 3H), 7.57 – 7.50 (m, 6H), 7.44 – 7.43 (m, 3H), 6.32 (s, 1H) ppm.

$^{13}\text{C NMR}$  (100 MHz, acetone- $d_6$ )  $\delta$  194.3, 134.7, 134.5, 133.9, 132.4, 131.5, 128.9 (two C), 128.8 (two C), 128.6, 124.1, 122.8, 90.4, 88.2, 66.8 ppm.

**HRMS** (ESI-TOF) Calcd for  $\text{C}_{22}\text{H}_{15}\text{N}_3\text{NaO}$   $[\text{M}+\text{Na}]^+$ : 360.1113, found: 360.1106.

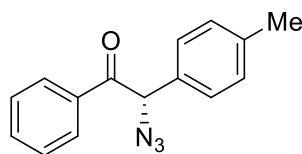

**2d**

**(S)-2-Azido-1-phenyl-2-(*p*-tolyl)ethan-1-one (2d)** was prepared as a light yellow oil according to the General Procedure B (120 h, 44.7 mg, 89% yield, 88% ee).

$[\alpha]_D^{25}$ : +100.5 ( $c = 2.0$ ,  $\text{CHCl}_3$ ). HPLC analysis of the product: Daicel CHIRALPAK® OD-H column; 1% *i*-PrOH in *n*-hexane; 1.0 mL/min; retention times: 13.1 min (major), 19.8 min (minor).

$^1\text{H NMR}$  (400 MHz, acetone- $d_6$ )  $\delta$  7.87 – 7.84 (m, 2H), 7.44 – 7.40 (m, 1H), 7.32 – 7.29 (m, 2H), 7.22 – 7.20 (m, 2H), 7.10 – 7.08 (m, 2H), 6.00 (s, 1H), 2.13 (s, 3H) ppm.

$^{13}\text{C NMR}$  (100 MHz, acetone- $d_6$ )  $\delta$  194.6, 139.2, 134.6, 133.7, 131.4, 130.1, 128.83, 128.80, 128.4, 67.0, 20.3 ppm.

HRMS (ESI-TOF) Calcd for C<sub>15</sub>H<sub>13</sub>N<sub>3</sub>NaO [M+Na]<sup>+</sup>: 274.0956, found: 274.0951.

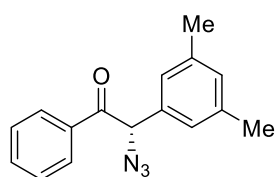

2e

(S)-2-Azido-2-(3,5-dimethylphenyl)-1-phenylethan-1-one (2e) was prepared as a colorless oil according to the General Procedure B (120 h, 48.8 mg, 92% yield, 85% ee).  $[\alpha]_D^{25}$ : +172.5 ( $c = 2.0$ , CHCl<sub>3</sub>). HPLC analysis of the product: Daicel CHIRALPAK<sup>®</sup> IC column; 2% *i*-PrOH in *n*-hexane; 1.0 mL/min; retention times: 9.1 min (major), 11.9 min (minor).

<sup>1</sup>H NMR (400 MHz, acetone-*d*<sub>6</sub>) δ 7.88 – 7.86 (m, 2H), 7.46 – 7.42 (m, 1H), 7.34 – 7.30 (m, 2H), 6.94 (s, 2H), 6.88 (s, 1H), 5.94 (s, 1H), 2.13 (s, 6H) ppm.

<sup>13</sup>C NMR (100 MHz, acetone-*d*<sub>6</sub>) δ 194.5, 139.0, 134.6, 134.2, 133.7, 130.8, 128.83, 128.79, 126.1, 67.2, 20.4 ppm.

HRMS (ESI-TOF) Calcd for C<sub>16</sub>H<sub>15</sub>N<sub>3</sub>NaO [M+Na]<sup>+</sup>: 288.1113, found: 288.1109.

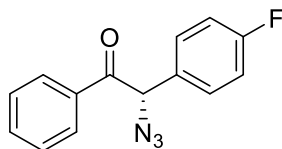

2f

(S)-2-Azido-2-(4-fluorophenyl)-1-phenylethan-1-one (2f) was prepared as a colorless oil according to the General Procedure B (168 h, 37.3 mg, 73% yield, 94% ee).

$[\alpha]_D^{25}$ : +119.9 ( $c = 2.0$ , CHCl<sub>3</sub>). HPLC analysis of the product: Daicel CHIRALPAK<sup>®</sup> OD-H column; 1% *i*-PrOH in *n*-hexane; 1.0 mL/min; retention times: 15.6 min (major), 23.2 min (minor).

<sup>1</sup>H NMR (400 MHz, acetone-*d*<sub>6</sub>) δ 7.88 – 7.86 (m, 2H), 7.47 – 7.31 (m, 5H), 7.09 – 7.04 (m, 2H), 6.13 (s, 1H) ppm.

<sup>13</sup>C NMR (100 MHz, acetone-*d*<sub>6</sub>) δ 194.4, 163.0 (d, <sup>1</sup>J<sub>C-F</sub> = 246 Hz), 134.5, 133.9, 130.723 (d, <sup>3</sup>J<sub>C-F</sub> = 8 Hz), 130.716, 128.9 (2C), 116.3 (d, <sup>2</sup>J<sub>C-F</sub> = 22 Hz), 66.3 ppm.

$^{19}\text{F}$  NMR (376 MHz, acetone- $d_6$ )  $\delta$  -113.5 ppm.

HRMS (ESI-TOF) Calcd for  $\text{C}_{14}\text{H}_{10}\text{FN}_3\text{NaO}$   $[\text{M}+\text{Na}]^+$ : 278.0706, found: 278.0702.

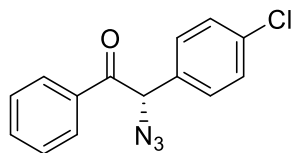

**2g**

**(S)-2-Azido-2-(4-chlorophenyl)-1-phenylethan-1-one (2g)** was prepared as a colorless oil according to the General Procedure B (168 h, 40.2 mg, 74% yield, 92% ee).

$[\alpha]_D^{25}$ : +83.2 ( $c = 1.0$ ,  $\text{CHCl}_3$ ). HPLC analysis of the product: Daicel CHIRALPAK<sup>®</sup> OD-H column; 1% *i*-PrOH in *n*-hexane; 1.0 mL/min; retention times: 16.4 min (major), 23.9 min (minor).

$^1\text{H}$  NMR (400 MHz, acetone- $d_6$ )  $\delta$  8.05 (d,  $J = 7.4$  Hz, 2H), 7.67 – 7.63 (m, 1H), 7.56 – 7.51 (m, 6H), 6.33 (s, 1H) ppm.

$^{13}\text{C}$  NMR (100 MHz, acetone- $d_6$ )  $\delta$  194.3, 134.7, 134.4, 133.9, 133.4, 130.2, 129.5, 128.9 (two C), 66.3 ppm.

HRMS (ESI-TOF) Calcd for  $\text{C}_{14}\text{H}_{10}\text{ClNO}$   $[\text{M}-\text{N}_3]^+$ : 229.0415, found: 229.0417.

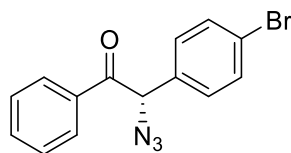

**2h**

**(S)-2-Azido-2-(4-bromophenyl)-1-phenylethan-1-one (2h)** was prepared as a colorless oil according to the General Procedure B (168 h, 35.4 mg, 56% yield, 91% ee).

$[\alpha]_D^{25}$ : +90.5 ( $c = 1.0$ ,  $\text{CHCl}_3$ ). HPLC analysis of the product: Daicel CHIRALPAK<sup>®</sup> OD-H column; 1% *i*-PrOH in *n*-hexane; 1.0 mL/min; retention times: 16.5 min (major), 24.4 min (minor).

$^1\text{H}$  NMR (400 MHz, acetone- $d_6$ )  $\delta$  8.05 – 8.03 (m, 2H), 7.67 – 7.62 (m, 3H), 7.53 – 7.46 (m, 4H), 6.30 (s, 1H) ppm.

$^{13}\text{C}$  NMR (100 MHz, acetone- $d_6$ )  $\delta$  194.2, 134.4, 133.94, 133.90, 132.5, 130.5, 128.9 (2C), 123.0, 66.4 ppm.

HRMS (ESI-TOF) Calcd for  $\text{C}_{14}\text{H}_{10}\text{BrO}$   $[\text{M}-\text{N}_3]^+$ : 272.9910, found: 272.9911.

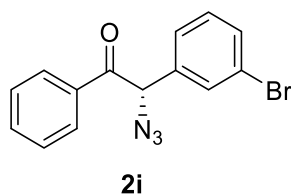

**(S)-2-Azido-2-(3-bromophenyl)-1-phenylethan-1-one (2i)** was prepared as a colorless oil according to the General Procedure B (168 h, 31.6 mg, 50% yield, 84% ee).

$[\alpha]_D^{25}$ : +68.9 ( $c = 1.0$ ,  $\text{CHCl}_3$ ). HPLC analysis of the product: Daicel CHIRALPAK<sup>®</sup> OD-H column; 1% *i*-PrOH in *n*-hexane; 1.0 mL/min; retention times: 16.8 min (major), 24.8 min (minor).

$^1\text{H}$  NMR (400 MHz, acetone- $d_6$ )  $\delta$  7.92 – 7.89 (m, 2H), 7.59 – 7.58 (m, 1H), 7.51 – 7.44 (m, 2H), 7.39 – 7.25 (m, 4H), 6.17 (s, 1H) ppm.

$^{13}\text{C}$  NMR (100 MHz, acetone- $d_6$ )  $\delta$  194.1, 137.0, 134.4, 134.0, 132.3, 131.4, 131.3, 128.94, 128.91, 127.2, 122.7, 66.3 ppm.

HRMS (ESI-TOF) Calcd for  $\text{C}_{14}\text{H}_{10}\text{BrO}$   $[\text{M}-\text{N}_3]^+$ : 272.9910, found: 274.9892.

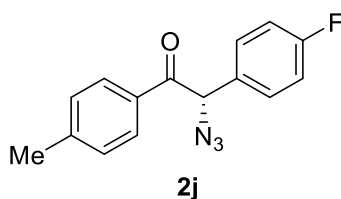

**(S)-2-Azido-2-(4-fluorophenyl)-1-(*p*-tolyl)ethan-1-one (2j)** was prepared as a colorless oil according to the General Procedure B (168 h, 36.1 mg, 67% yield, 96% ee).

$[\alpha]_D^{25}$ : +97.8 ( $c = 1.0$ ,  $\text{CHCl}_3$ ). HPLC analysis of the product: Daicel CHIRALPAK<sup>®</sup> OD-H column; 3% *i*-PrOH in *n*-hexane; 1.0 mL/min; retention times: 8.6 min (major), 10.6 min (minor).

$^1\text{H}$  NMR (400 MHz, acetone- $d_6$ )  $\delta$  7.78 – 7.76 (m, 2H), 7.41 – 7.38 (m, 2H), 7.15 – 7.05 (m, 4H), 6.08 (s, 1H), 2.20 (s, 3H) ppm.



$^{13}\text{C}$  NMR (100 MHz, acetone- $d_6$ )  $\delta$  194.0, 163.0 (d,  $^1J_{\text{C-F}} = 245$  Hz), 144.9, 131.9, 130.9 (d,  $^4J_{\text{C-F}} = 3$  Hz), 130.7 (d,  $^3J_{\text{C-F}} = 9$  Hz), 129.5, 129.0, 116.2 (d,  $^2J_{\text{C-F}} = 22$  Hz), 66.1, 20.7 ppm.

$^{19}\text{F}$  NMR (376 MHz, acetone- $d_6$ )  $\delta$  -113.7 ppm.

HRMS (ESI-TOF) Calcd for  $\text{C}_{15}\text{H}_{12}\text{FN}_3\text{NaO}$   $[\text{M}+\text{Na}]^+$ : 292.0862, found: 292.0859.

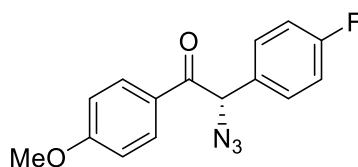

**2k**

(*S*)-2-Azido-2-(4-fluorophenyl)-1-(4-methoxyphenyl)ethan-1-one (**2k**) was prepared as a colorless oil according to the General Procedure B (168 h, 47.4 mg, 83% yield, 94% ee).

$[\alpha]_D^{25}$ : +107.9 ( $c = 2.0$ ,  $\text{CHCl}_3$ ). HPLC analysis of the product: Daicel CHIRALPAK<sup>®</sup> IC column; 10% *i*-PrOH in *n*-hexane; 1.0 mL/min; retention times: 10.4 min (major), 13.6 min (minor).

$^1\text{H}$  NMR (400 MHz, acetone- $d_6$ )  $\delta$  7.87 – 7.83 (m, 2H), 7.41 – 7.38 (m, 2H), 7.08 – 7.04 (m, 2H), 6.85 – 6.81 (m, 2H), 6.02 (s, 1H), 3.69 (s, 3H) ppm.

$^{13}\text{C}$  NMR (100 MHz, acetone- $d_6$ )  $\delta$  192.8, 164.2, 163.0 (d,  $^1J_{\text{C-F}} = 245$  Hz), 131.3, 131.2 (d,  $^4J_{\text{C-F}} = 3$  Hz), 130.6 (d,  $^3J_{\text{C-F}} = 8$  Hz), 127.1, 116.2 (d,  $^2J_{\text{C-F}} = 22$  Hz), 114.1, 65.8, 55.2 ppm.

$^{19}\text{F}$  NMR (376 MHz, acetone- $d_6$ )  $\delta$  -113.7 ppm.

HRMS (ESI-TOF) Calcd for  $\text{C}_{15}\text{H}_{12}\text{FN}_3\text{NaO}_2$   $[\text{M}+\text{Na}]^+$ : 308.0811, found: 308.0809.

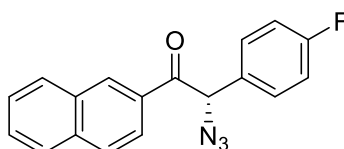

**2l**

(*S*)-2-Azido-2-(4-fluorophenyl)-1-(naphthalen-2-yl)ethan-1-one (**2l**) was prepared as a colorless oil according to the General Procedure B (168 h, 53.1 mg, 87% yield, 96% ee).

$[\alpha]_D^{25}$ : +100.6 ( $c = 1.5$ ,  $\text{CHCl}_3$ ). HPLC analysis of the product: Daicel CHIRALPAK® IC column; 3% *i*-PrOH in *n*-hexane; 1.0 mL/min; retention times: 12.3 min (major), 15.9 min (minor).

$^1\text{H NMR}$  (400 MHz, acetone- $d_6$ )  $\delta$  7.79 (s, 1H), 7.14 – 7.11 (m, 2H), 7.07 – 7.01 (m, 2H), 6.76 – 6.66 (m, 4H), 6.33 – 6.28 (m, 2H), 5.59 (s, 1H) ppm.

$^{13}\text{C NMR}$  (100 MHz, acetone- $d_6$ )  $\delta$  194.6, 163.0 (d,  $^1J_{\text{C-F}} = 246$  Hz), 135.7, 132.4, 131.7, 131.2, 130.84, 130.75 (d,  $^3J_{\text{C-F}} = 9$  Hz), 129.7, 129.2, 128.8, 127.8, 127.2, 123.9, 116.3 (d,  $^2J_{\text{C-F}} = 22$  Hz), 66.3 ppm.

$^{19}\text{F NMR}$  (376 MHz, acetone- $d_6$ )  $\delta$  -113.4 ppm.

HRMS (ESI-TOF) Calcd for  $\text{C}_{18}\text{H}_{12}\text{FN}_3\text{NaO}$   $[\text{M}+\text{Na}]^+$ : 328.0862, found: 328.0858.

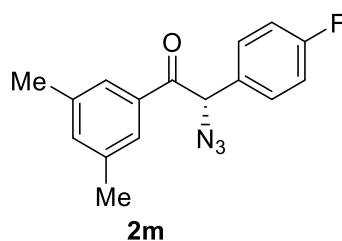

**(S)-2-azido-1-(3,5-dimethylphenyl)-2-(4-fluorophenyl)ethan-1-one (2m)** was prepared as a colorless oil according to the General Procedure B (168 h, 52.7 mg, 79% yield, 91% ee).

$[\alpha]_D^{25}$ : +164.9 ( $c = 1.0$ ,  $\text{CHCl}_3$ ). HPLC analysis of the product: Daicel CHIRALPAK® OD-H column; 1% *i*-PrOH in *n*-hexane; 1.0 mL/min; retention times: 13.0 min (major), 23.6 min (minor).

$^1\text{H NMR}$  (400 MHz, acetone- $d_6$ )  $\delta$  7.67 – 7.66 (m, 2H), 7.59 – 7.54 (m, 2H), 7.25 – 7.21 (m, 3H), 6.27 (s, 1H), 2.32 (s, 6H) ppm.

$^{13}\text{C NMR}$  (100 MHz, acetone- $d_6$ )  $\delta$  194.7, 163.0 (d,  $^1J_{\text{C-F}} = 246$  Hz), 138.6, 135.4, 134.7, 130.9 (d,  $^4J_{\text{C-F}} = 3$  Hz), 130.7 (d,  $^3J_{\text{C-F}} = 9$  Hz), 126.6, 116.2 (d,  $^2J_{\text{C-F}} = 22$  Hz), 66.1, 20.2 ppm.

$^{19}\text{F NMR}$  (282 MHz, acetone- $d_6$ )  $\delta$  -113.6 ppm.

HRMS (ESI-TOF) Calcd for  $\text{C}_{16}\text{H}_{14}\text{FO}$   $[\text{M}-\text{N}_3]^+$ : 241.1023, found: 241.1026.

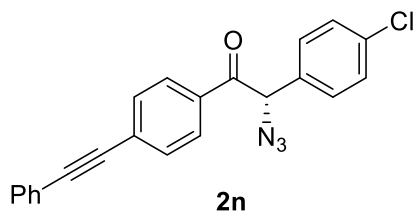

**(S)-2-Azido-2-(4-chlorophenyl)-1-(4-(phenylethynyl)phenyl)ethan-1-one (2n)** was prepared as a colorless oil according to the General Procedure B (168 h, 40.2 mg, 54% yield, 87% ee).

$[\alpha]_D^{25}$ : +80.9 ( $c = 1.0$ ,  $\text{CHCl}_3$ ). HPLC analysis of the product: Daicel CHIRALPAK® IC column; 1% *i*-PrOH in *n*-hexane; 1.0 mL/min; retention times: 16.7 min (major), 18.2 min (minor).

$^1\text{H NMR}$  (400 MHz, acetone- $d_6$ )  $\delta$  8.07 – 8.05 (m, 2H), 7.66 – 7.64 (m, 2H), 7.59 – 7.49 (m, 6H), 7.46 – 7.43 (m, 3H), 6.33 (s, 1H) ppm.

$^{13}\text{C NMR}$  (100 MHz, acetone- $d_6$ )  $\delta$  193.5, 134.8, 133.7, 133.3, 131.7, 131.6, 130.3, 130.0, 129.2, 129.1, 128.7, 128.6, 122.3, 92.9, 88.1, 66.4 ppm.

**HRMS** (ESI-TOF) Calcd for  $\text{C}_{22}\text{H}_{14}\text{ClO}$   $[\text{M}-\text{N}_3]^+$ : 329.0728, found: 329.0727.

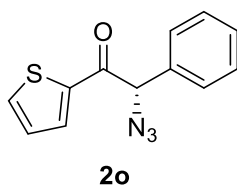

**(S)-2-Azido-2-phenyl-1-(thiophen-2-yl)ethan-1-one (2o)** was prepared as a colorless oil according to the General Procedure B (168 h, 39.9 mg, 82% yield, 88% ee).

$[\alpha]_D^{25}$ : +140.6 ( $c = 1.0$ ,  $\text{CH}_2\text{Cl}_2$ ). HPLC analysis of the product: Daicel CHIRALPAK® OD-H column; 5% *i*-PrOH in *n*-hexane; 1.0 mL/min; retention times: 11.2 min (major), 13.7 min (minor).

$^1\text{H NMR}$  (400 MHz, acetone- $d_6$ )  $\delta$  7.81 – 7.78 (m, 2H), 7.41 – 7.39 (m, 2H), 7.35 – 7.26 (m, 3H), 7.04 – 7.02 (m, 1H), 5.92 (s, 1H) ppm.

$^{13}\text{C NMR}$  (100 MHz, acetone- $d_6$ )  $\delta$  187.5, 141.0, 135.7, 134.8, 134.3, 129.4, 129.3, 128.7, 128.3, 67.5 ppm.

**HRMS** (ESI-TOF) Calcd for  $\text{C}_{12}\text{H}_9\text{OS}$   $[\text{M}-\text{N}_3]^+$ : 201.0369, found: 201.0374.

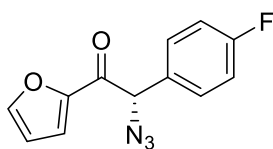

**2p**

**(S)-2-Azido-2-(4-fluorophenyl)-1-(furan-2-yl)ethan-1-one (2p)** was prepared as a colorless oil according to the General Procedure B (168 h, 25.5 mg, 52% yield, 89% ee).  $[\alpha]_D^{25}$ : +77.6 ( $c = 0.5$ ,  $\text{CHCl}_3$ ). HPLC analysis of the product: Daicel CHIRALPAK<sup>®</sup> OD-H column; 3% *i*-PrOH in *n*-hexane; 1.0 mL/min; retention times: 9.5 min (major), 11.3 min (minor).

<sup>1</sup>H NMR (400 MHz, acetone-*d*<sub>6</sub>)  $\delta$  7.91 – 7.90 (m, 1H), 7.61 – 7.58 (m, 2H), 7.51 (d,  $J = 6.4$  Hz, 1H), 7.29 – 7.24 (m, 2H), 6.71 – 6.69 (m, 1H), 6.01 (s, 1H) ppm.

<sup>13</sup>C NMR (100 MHz, acetone-*d*<sub>6</sub>)  $\delta$  182.5, 163.1 (d,  $^1J_{\text{C-F}} = 245$  Hz), 150.2, 148.4, 130.7 (d,  $^4J_{\text{C-F}} = 3$  Hz), 130.6 (d,  $^3J_{\text{C-F}} = 9$  Hz), 120.1, 116.1 (d,  $^2J_{\text{C-F}} = 22$  Hz), 112.7, 65.9 ppm.

<sup>19</sup>F NMR (282 MHz, acetone-*d*<sub>6</sub>)  $\delta$  –113.7 ppm.

HRMS (ESI-TOF) Calcd for C<sub>12</sub>H<sub>8</sub>FO<sub>2</sub> [M-N<sub>3</sub>]<sup>+</sup>: 203.0503, found: 203.0506.

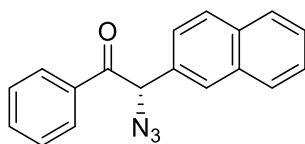

**2q**

**(S)-2-Azido-2-(naphthalen-2-yl)-1-phenylethan-1-one (2q)** was prepared as a colorless oil according to the General Procedure B (120 h, 43.7 mg, 76% yield, 77% ee).  $[\alpha]_D^{25}$ : +16.3 ( $c = 1.0$ ,  $\text{CH}_2\text{Cl}_2$ ). HPLC analysis of the product: Daicel CHIRALPAK<sup>®</sup> IC column; 3% *i*-PrOH in *n*-hexane; 1.0 mL/min; retention times: 12.2 min (major), 15.5 min (minor).

<sup>1</sup>H NMR (400 MHz, acetone-*d*<sub>6</sub>)  $\delta$  8.09 – 8.07 (m, 2H), 8.03 – 8.00 (m, 2H), 7.96 – 7.91 (m, 2H), 7.65 – 7.63 (m, 1H), 7.58 – 7.52 (m, 3H), 7.47 – 7.44 (m, 2H), 6.42 (s, 1H) ppm.

<sup>13</sup>C NMR (100 MHz, acetone-*d*<sub>6</sub>)  $\delta$  194.5, 134.6, 133.8, 133.43, 133.42, 132.0, 129.5, 128.9, 128.8, 128.2, 128.0, 127.8, 127.0, 126.8, 125.7, 67.4 ppm.

HRMS (ESI-TOF) Calcd for C<sub>18</sub>H<sub>13</sub>N<sub>3</sub>NaO [M+Na]<sup>+</sup>: 310.0956, found: 310.0954.

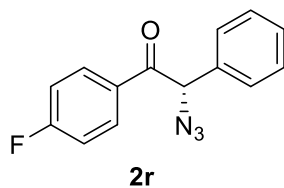

**(S)-2-Azido-1-(4-fluorophenyl)-2-phenylethan-1-one (2r)** was prepared as a colorless oil according to the General Procedure B (168 h, 23.5 mg, 46% yield, 67% ee).

$[\alpha]_D^{25}$ : +58.3 ( $c = 1.0$ , CHCl<sub>3</sub>). HPLC analysis of the product: Daicel CHIRALPAK® OD-H column; 3% *i*-PrOH in *n*-hexane; 1.0 mL/min; retention times: 9.8 min (major), 11.4 min (minor).

<sup>1</sup>H NMR (400 MHz, acetone-*d*<sub>6</sub>) δ 8.13 – 8.08 (m, 2H), 7.50 – 7.39 (m, 5H), 7.26 – 7.21 (m, 2H), 6.21 (s, 1H) ppm.

<sup>13</sup>C NMR (100 MHz, acetone-*d*<sub>6</sub>) δ 193.1, 165.8 (d, <sup>1</sup>J<sub>C-F</sub> = 253 Hz), 134.3, 131.9 (d, <sup>3</sup>J<sub>C-F</sub> = 9 Hz), 131.2 (d, <sup>4</sup>J<sub>C-F</sub> = 3 Hz), 129.5, 129.3, 128.5, 115.8 (d, <sup>2</sup>J<sub>C-F</sub> = 22 Hz), 67.2 ppm.

<sup>19</sup>F NMR (376 MHz, acetone-*d*<sub>6</sub>) δ –105.8 ppm.

HRMS (ESI-TOF) Calcd for C<sub>14</sub>H<sub>10</sub>FO [M-N<sub>3</sub>]<sup>+</sup>: 213.0710, found: 213.0713.

## IV. Larger-Scale Reaction and Product Transformations

### Larger-scale synthesis of (R)-2b.

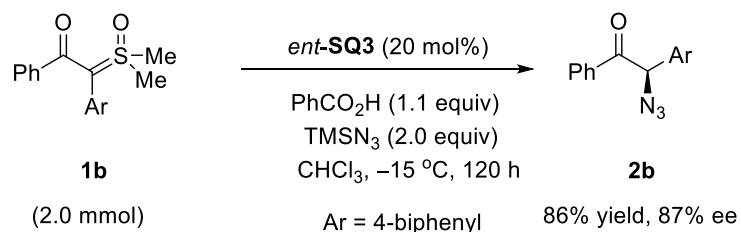

The sulfoxonium ylide **1b** (697 mg, 2.0 mmol, 1.0 equiv), benzoic acid (269 mg, 2.2 mmol, 1.1 equiv), catalyst *ent*-SQ3 (276 mg, 0.4 mmol, 20 mol %), and CHCl<sub>3</sub> (10 mL) were added to a 25-mL flask equipped with a magnetic stir bar. The flask was carefully sealed with a rubber stopper and cooled to -15 °C. The resulted brown solution was stirred at the same temperature for 10 min followed by slow addition of TMSN<sub>3</sub> (526 μL, 4.0 mmol, 2.0 equiv) by microsyringe. The mixture was stirred at the same temperature and the reaction progress was monitored by TLC. Upon completion (120 h), it was directly subjected to flash column chromatography on silica gel (eluent: *n*-hexane/EtOAc = 20:1) to afford the desired product (R)-**2b** as a colorless solid (539 mg, 86% yield, 87% ee). Moreover, the catalyst *ent*-SQ3 was recovered in 90% yield (eluent: *n*-hexane/EtOAc = 3:1 to 2:3).

*Note: the ACS grade CHCl<sub>3</sub> was used for this reaction.*

### Synthetic transformations of (R)-2b.

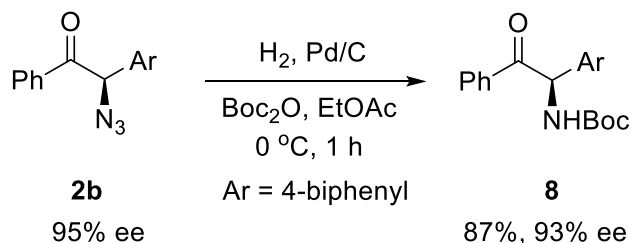

*tert*-Butyl (R)-(1-([1,1'-biphenyl]-4-yl)-2-oxo-2-phenylethyl)carbamate **8**. To a 25 mL round bottomed flask were added (R)-**2b** (62 mg, 0.2 mmol, 95% ee after recrystallization), Pd/C (10% on charcoal wetted with *ca.* 55% water, 12.4 mg, 20 wt %), and EtOAc (2.0 mL). The mixture was degassed three times using vacuum pump

followed by backfilling with N<sub>2</sub>. Then, Boc<sub>2</sub>O (56 mL, 0.24 mmol, 1.2 equiv) was added into the reaction mixture via syringe. The resulted suspension was stirred at 0 °C for 10 min, and the reaction atmosphere was changed to H<sub>2</sub> (with balloon) and stirred for 1 h. Next, the mixture was filtered through a pad of celite, and the filter cake was washed with EtOAc (10 mL). The combined filtrates was concentrated under reduced pressure to afford a colorless residue, which was directly purified by flash column chromatography on silica gel (eluent: *n*-hexane/EtOAc = 20:1 to 10:1) to get the desired product as a colorless solid (67.4 mg, 87% yield, 93% ee).

[ $\alpha$ ]<sub>D</sub><sup>25</sup>: -275.3 (*c* = 1.0, CHCl<sub>3</sub>). HPLC analysis of the product: Daicel CHIRALPAK® IC column; 5% *i*-PrOH in *n*-hexane; 1.0 mL/min; retention times: 11.2 min (major), 19.3 min (minor).

<sup>1</sup>H NMR (300 MHz, CDCl<sub>3</sub>) δ 8.01 – 7.99 (m, 2H), 7.54 – 7.51 (m, 5H), 7.45 – 7.38 (m, 6H), 7.35 – 7.29 (m, 1H), 6.33 (d, *J* = 7.5 Hz, 1H), 6.08 (d, *J* = 7.5 Hz, 1H), 1.45 (s, 9H) ppm.

<sup>13</sup>C NMR (75 MHz, CDCl<sub>3</sub>) δ 196.1, 155.0, 141.1, 140.3, 136.5, 134.5, 133.7, 129.1, 128.8, 128.7, 128.5, 127.9, 127.5, 127.0, 80.0, 59.4, 28.4 ppm.

HRMS (ESI-TOF) Calcd for C<sub>25</sub>H<sub>25</sub>NNaO<sub>3</sub> [M+Na]<sup>+</sup>: 410.1732, found: 410.1729.

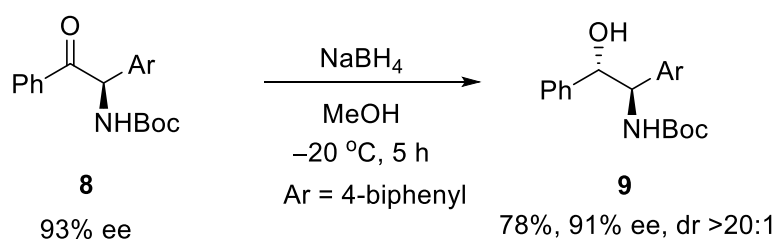

***tert*-Butyl ((1*R*,2*S*)-1-([1,1'-biphenyl]-4-yl)-2-hydroxy-2-phenylethyl)carbamate (9).**

Under N<sub>2</sub> at -20 °C, to a solution of the chiral  $\alpha$ -aminoketone **8** (0.2 mmol, 77.5 mg, 93% ee) in anhydrous MeOH (2.0 mL) was added NaBH<sub>4</sub> (0.6 mmol, 22.7 mg, 3.0 equiv) in one portion. The resulted suspension was stirred at the same temperature until full conversion (~5 h) of the aminoketone **8**. Then, the reaction mixture was carefully quenched by slow addition of water (5.0 mL) and extracted with EtOAc (10 mL  $\times$  3). The combined organic layers were washed with saturated aqueous NaCl solution (5

mL), and dried over anhydrous Na<sub>2</sub>SO<sub>4</sub>. After a filtration, the filtrate was concentrated to afford the crude product, and the d.r. value was determined by crude <sup>1</sup>H NMR analysis. The crude product was further purified by column chromatography on silica gel to afford the desired 1,2-aminoalcohol product **9** as a colorless solid (60.8 mg, 78% yield, 91% ee).

[α]<sub>D</sub><sup>25</sup>: +57.1 (*c* = 1.0, CHCl<sub>3</sub>). HPLC analysis of the product: Daicel CHIRALPAK® AD-H column; 15% *i*-PrOH in *n*-hexane; 1.0 mL/min; retention times: 17.2 min (major), 10.0 min (minor).

<sup>1</sup>H NMR (300 MHz, CDCl<sub>3</sub>) δ 7.58 – 7.55 (m, 2H), 7.48 – 7.40 (m, 4H), 7.36 – 7.31 (m, 1H), 7.26 – 7.23 (m, 3H), 7.10 – 7.08 (m, 4H), 5.38 – 5.35 (m, 1H), 5.07 – 5.02 (m, 2H), 1.41 (s, 9H), 1.26 (s, 1H) ppm.

<sup>13</sup>C NMR (75 MHz, CDCl<sub>3</sub>) δ 155.7, 140.6, 140.4, 139.9, 136.7, 128.8, 128.2, 128.1, 127.8, 127.3, 127.0, 126.8, 126.6, 80.0, 60.3, 29.7, 28.4 ppm.

HRMS (ESI-TOF) Calcd for C<sub>25</sub>H<sub>27</sub>NNaO<sub>3</sub> [M+Na]<sup>+</sup>: 412.1889, found: 412.1888.

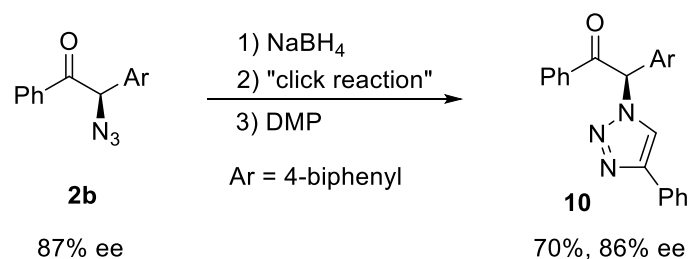

**(R)-2-((1,1'-biphenyl)-4-yl)-1-phenyl-2-(4-phenyl-1H-1,2,3-triazol-1-yl)ethan-1-one (10)**. To a 25 mL single-neck round bottomed flask were added (*R*)-**2b** (62 mg, 0.2 mmol, 87% ee) and MeOH (1.0 mL). The resulted suspension was cooled to 0 °C. Then, NaBH<sub>4</sub> (9.1 mg, 0.24 mmol, 1.2 equiv) was added in one portion. The reaction mixture was stirred at the same temperature until the full conversion of **2b**. Upon completion (1.0 h), a few drops of HCl (1 M) were added to quench the reaction, and the mixture was extracted with Et<sub>2</sub>O (3 × 10 mL). The combined organic layers were washed with brine (10 mL), dried over anhydrous Na<sub>2</sub>O<sub>4</sub>, filtered, and concentrated *in vacuo* to give the crude β-azido alcohol, which was directly used for the next step without further



purification.

Under N<sub>2</sub>, the crude β-azido alcohol (0.2 mmol), CuSO<sub>4</sub>·5H<sub>2</sub>O (10.0 mg, 0.04 mmol, 20 mol %), sodium ascorbate (16.0 mg, 0.08 mmol, 0.4 equiv), *t*BuOH (1.6 mL), and H<sub>2</sub>O (0.8 mL) were added into a 10 mL vial. Under vigorous stirring, phenylacetylene (24.4 mg, 0.24 mmol, 1.2 equiv) was added. During which time the color of the reaction mixture was turned to yellow. The reaction mixture was stirred at 40 °C for 24 h, then diluted with DCM (10 mL), filtered through a short pad of celite. The filter cake was washed with DCM (10 mL), and the combined organic layers were concentrated *in vacuo* to give the crude β-hydroxyl triazole, which was directly used for the next step without further purification.

The crude β-hydroxyl triazole (0.2 mmol) was dissolved in anhydrous DCM (2.0 mL), and the resulted mixture was cooled to 0 °C. Then, Dess–Martin periodinane (127 mg, 0.3 mmol, 1.5 equiv) was added. The reaction mixture was stirred at the same temperature until full conversion of β-hydroxyl triazole. Upon completion (~3 h), an aqueous solution of NaHCO<sub>3</sub> (10 mL, 1.0 M) was added to quench the reaction. Then, the reaction mixture was extracted with DCM (3 × 5 mL). The combined organic layers were washed with brine (10 mL), dried over Na<sub>2</sub>SO<sub>4</sub>, filtered, and concentrated *in vacuo* to give the crude product. The crude product was then purified by flash column chromatography on silica gel (eluent: *n*-hexane/EA = 5:1 to 3:1) to give the desired product **9** as a colorless solid (58.2 mg, 70% yield over three steps, 86% ee).

[ $\alpha$ ]<sub>D</sub><sup>25</sup>: -59.1 (*c* = 1.0, CHCl<sub>3</sub>). HPLC analysis of the product: Daicel CHIRALPAK® AD-H column; 20% *i*-PrOH in *n*-hexane; 1.0 mL/min; retention times: 36.1 min (major), 49.9 min (minor).

<sup>1</sup>H NMR (300 MHz, CDCl<sub>3</sub>) δ 8.04 – 8.01 (m, 2H), 7.97 (s, 1H), 7.85 – 7.82 (m, 2H), 7.66 – 7.62 (m, 3H), 7.60 – 7.53 (m, 5H), 7.50 – 7.27 (m, 8H) ppm.

<sup>13</sup>C NMR (75 MHz, CDCl<sub>3</sub>) δ 191.9, 147.9, 142.9, 139.7, 134.4, 134.1, 132.3, 130.6, 129.21, 129.15, 129.1, 129.0, 128.8, 128.6, 128.1, 128.0, 127.1, 125.8, 120.6, 68.1 ppm.

HRMS (CI<sup>+</sup>) Calcd for C<sub>28</sub>H<sub>21</sub>N<sub>3</sub>NaO [M+Na]<sup>+</sup>: 438.1582, found: 438.1577.

## V. Mechanistic Studies

### (1) Non-linear effects

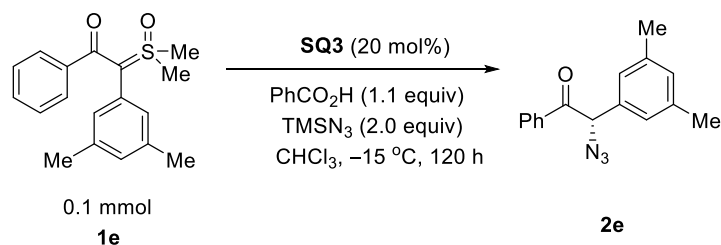

| entry | ee of <b>SQ3</b> (%) | ee of <b>2e</b> (%) |
|-------|----------------------|---------------------|
| 1     | >99                  | 85                  |
| 2     | 80                   | 69                  |
| 3     | 60                   | 53                  |
| 4     | 40                   | 35                  |
| 5     | 20                   | 17                  |
| 6     | 0                    | 0                   |

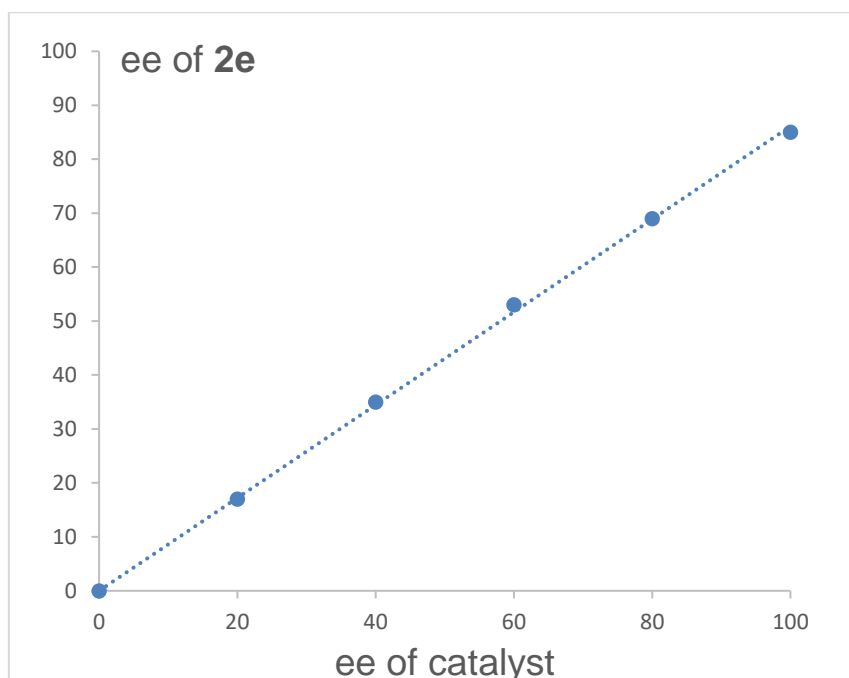

## (2) Enantiomeric excess as a function of catalyst loading

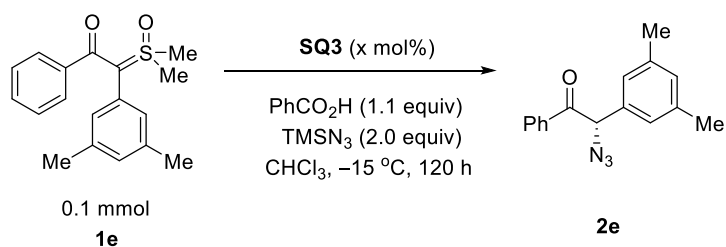

| entry | x   | er of <b>2e</b> |
|-------|-----|-----------------|
| 1     | 10  | 9.5             |
| 2     | 5   | 5.6             |
| 3     | 2.5 | 3               |

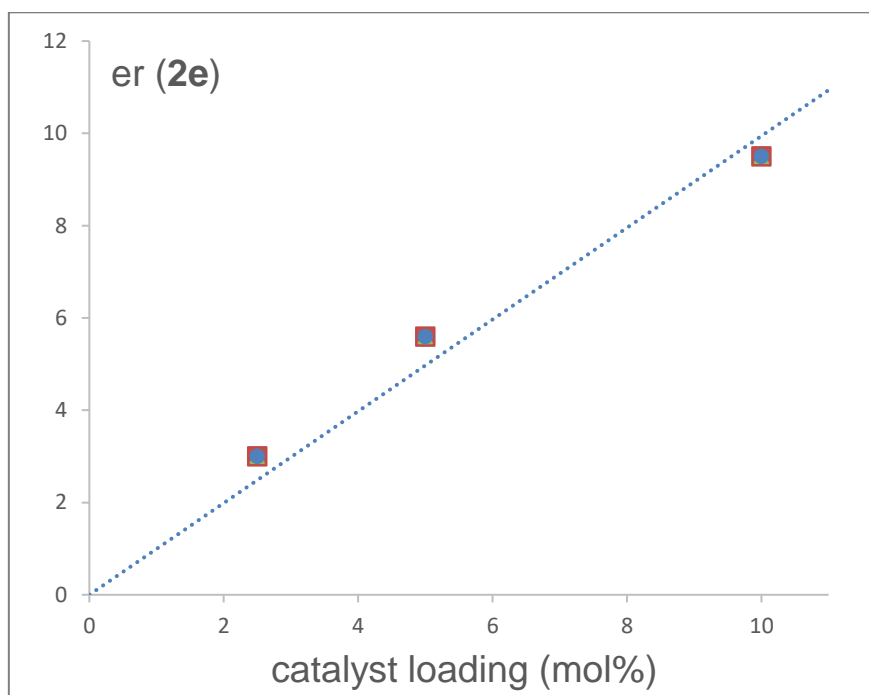

## (3) The general procedure with HCl and NaN<sub>3</sub> as the HN<sub>3</sub> source

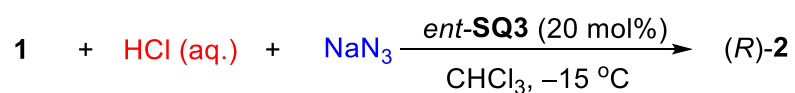

A 4-mL vial equipped with a magnetic stir bar was charged with the sulfoxonium ylide **1** (0.10 mmol, 1.0 equiv), NaN<sub>3</sub> (7.15 mg, 0.11 mmol, 1.1 equiv), *ent*-**SQ3** (13.8 mg, 0.02 mmol, 20 mol%), and CHCl<sub>3</sub> (0.5 mL). The vial was carefully sealed with a

puncturable screw-cap and electrical tape and then cooled to  $-15\text{ }^{\circ}\text{C}$ . After stirring for 5 min, HCl (27.5  $\mu\text{L}$ , 4.0 M aqueous solution, 0.11 mmol, 1.1 equiv) was injected into the vial by syringe. The mixture was stirred at  $-15\text{ }^{\circ}\text{C}$  for the indicated time, and then the reaction mixture was directly subjected to flash column chromatography on silica gel (eluent: *n*-hexane/ethyl acetate = 10:1  $\rightarrow$  5:1) to give the desired product. The results were almost same as those obtained by the standard protocol with PhCO<sub>2</sub>H and TMSN<sub>3</sub> as the HN<sub>3</sub> source.

| entry | ( <i>R</i> )-2 | t/h | yield (%) | ee (%) |
|-------|----------------|-----|-----------|--------|
| 1     | <b>2a</b>      | 120 | 72        | 90     |
| 2     | <b>2e</b>      | 120 | 79        | 85     |
| 3     | <b>2f</b>      | 168 | 60        | 94     |
| 4     | <b>2p</b>      | 168 | 69        | 88     |

#### (4) Kinetic isotope effect (KIE)

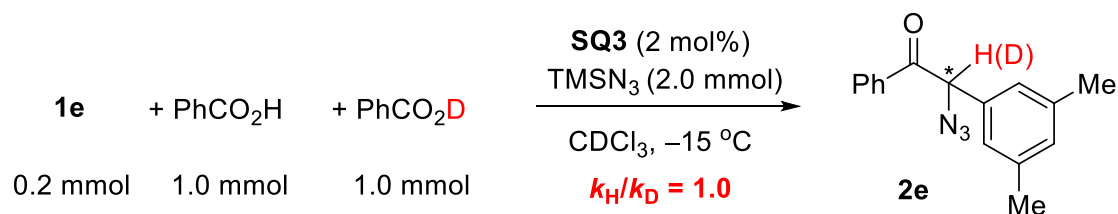

At room temperature, to an oven-dried 4-mL vial were added sulfoxonium ylide **1e** (0.2 mmol, 60.1 mg, 1.0 equiv), PhCO<sub>2</sub>H (611 mg, 1.0 mmol, 5.0 equiv), PhCO<sub>2</sub>D (616 mg, 1.0 mmol, 5.0 equiv), and a solution of **SQ3** (27.6 mg, 2 mol%) in CDCl<sub>3</sub> (1.0 mL). The vial was sealed with a puncturable screw cap and cooled down to  $-15\text{ }^{\circ}\text{C}$ . Then, TMSN<sub>3</sub> (263  $\mu\text{L}$ , 2.0 mmol, 5.0 equiv) was injected into the vial. The reaction mixture was stirred at the same temperature until full conversion of **1e** (120 h). The mixture was directly subjected to flash column chromatography on silica gel to give the product. <sup>1</sup>H NMR analysis indicated 49% D-incorporation at the  $\alpha$ -position in product. The NMR spectrum is shown below.

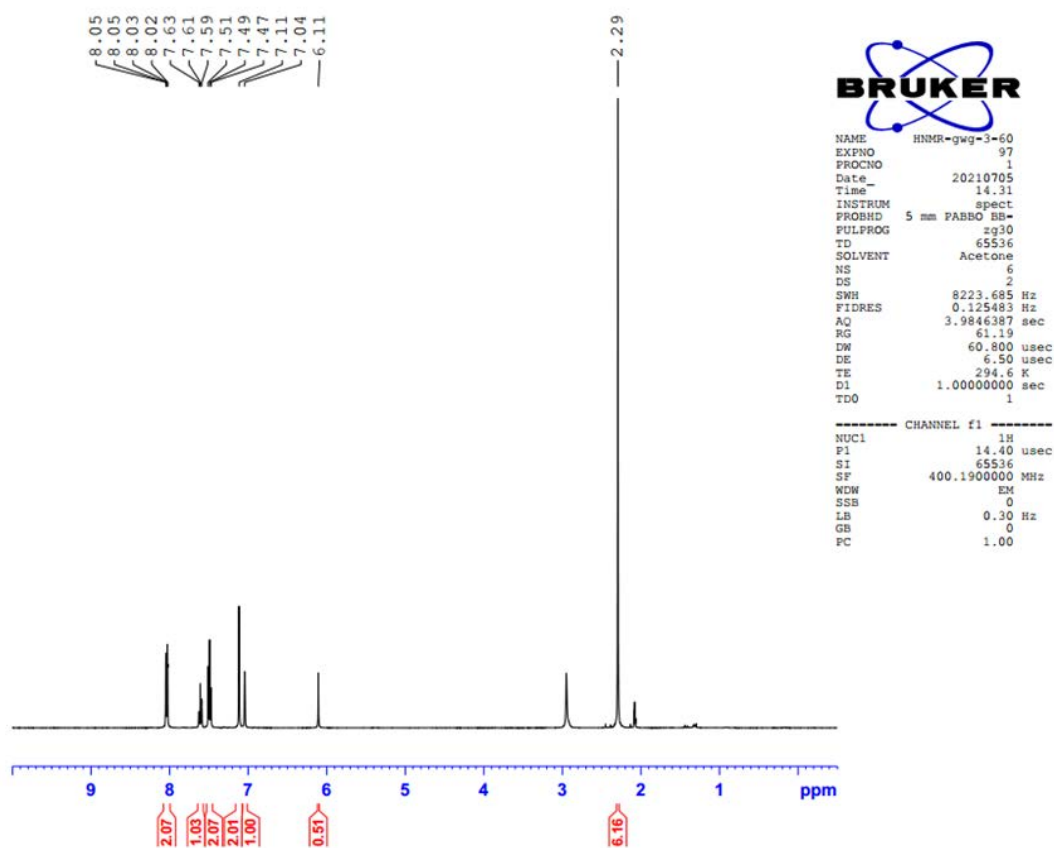

The stability of **2e** has been checked at  $-15\text{ }^{\circ}\text{C}$  in the presence of benzoic acid. The enantiopurity of **2e** remained intact, indicating no H/D scrambling.

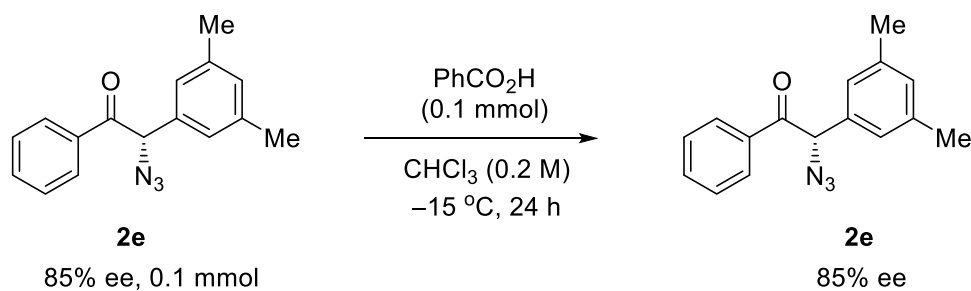

## (5) NMR study to investigate the interactions between substrate and catalyst

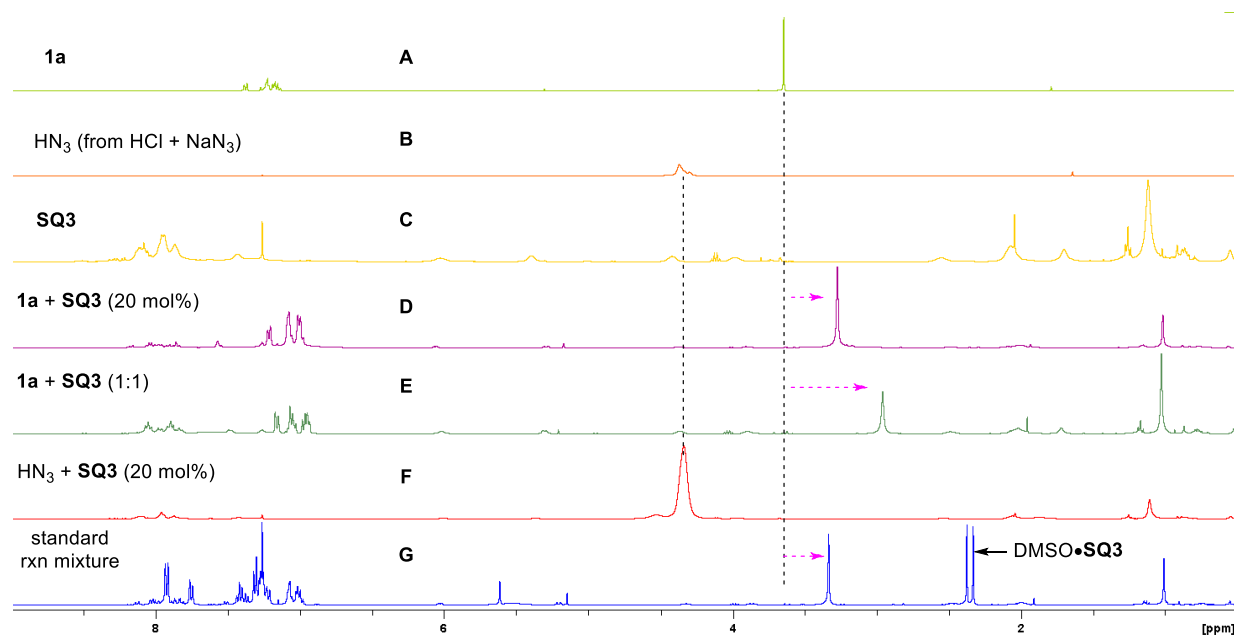

**A:** **1a** (0.1 mmol) in CDCl<sub>3</sub> (0.5 mL)

**B:** HN<sub>3</sub> (0.1 mmol) in CDCl<sub>3</sub> (0.5 mL) by mixing HCl (aq.) and NaN<sub>3</sub>

**C:** **SQ3** (0.02 mmol) in CDCl<sub>3</sub> (0.5 mL)

**D:** **1a** (0.1 mmol) and **SQ3** (0.02 mmol) in CDCl<sub>3</sub> (0.5 mL)

**E:** **1a** (0.02 mmol) and **SQ3** (0.02 mmol) in CDCl<sub>3</sub> (0.5 mL)

**F:** HN<sub>3</sub> (0.1 mmol) and **SQ3** (0.02 mmol) in CDCl<sub>3</sub> (0.5 mL) by adding **SQ3** to tube **D**.

**G:** Standard reaction mixture at particle conversion.

## (6) NMR study to investigate the reaction using HCl and NaN<sub>3</sub>

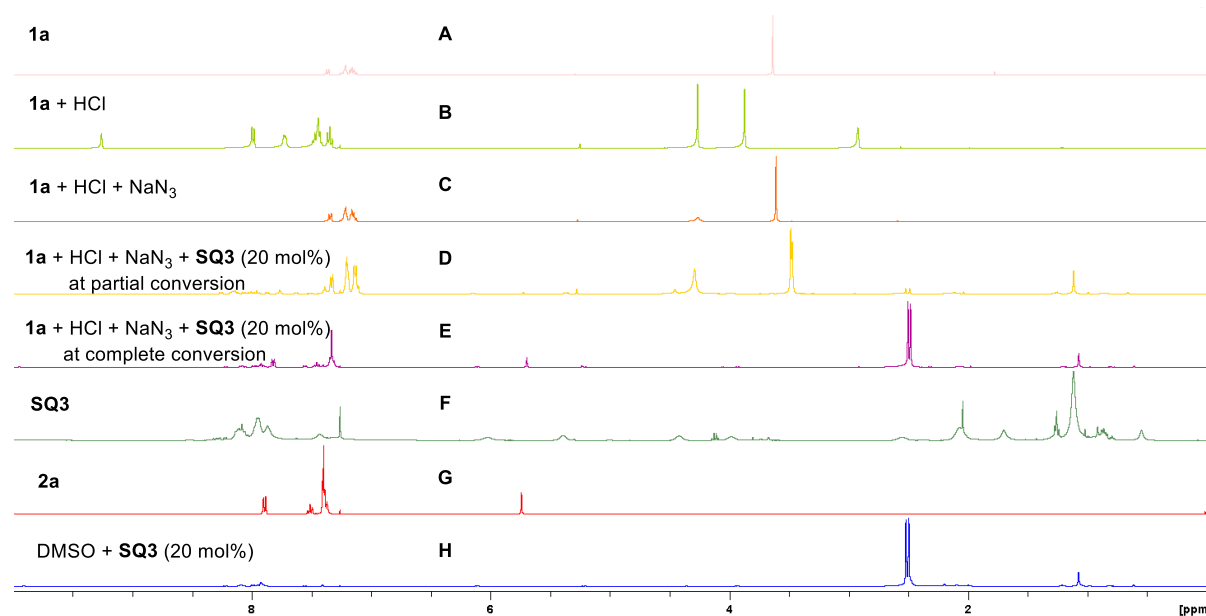

A: **1a** (0.1 mmol) in CDCl<sub>3</sub> (0.5 mL)

B: **1a** (0.1 mmol), and HCl (0.11 mmol, 4.0 M aqueous solution) in CDCl<sub>3</sub> (0.5 mL)

C: B + NaN<sub>3</sub> (0.11 mmol)

D: The standard reaction mixture using HCl and NaN<sub>3</sub> at partial conversion

E: The standard reaction mixture using HCl and NaN<sub>3</sub> at complete conversion

F: **SQ3** (0.02 mmol) in CDCl<sub>3</sub> (0.5 mL)

G: **2a** (0.1 mmol) in CDCl<sub>3</sub> (0.5 mL)

H: DMSO (0.1 mmol) and **SQ3** (0.02 mmol) in CDCl<sub>3</sub> (0.5 mL)

## (7) Synthesis and reaction of sulfoxonium chloride salt C

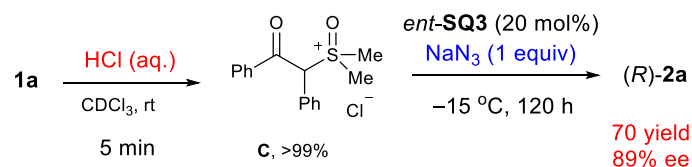

To an NMR tube charged with **1a** (27 mg, 0.1 mmol, 1.0 equiv) and CDCl<sub>3</sub> (0.5 mL) was added HCl (27.5  $\mu$ L, 4.0 M aqueous solution, 0.11 mmol, 1.1 equiv). Upon efficient shaking, **1a** was cleanly converted to the sulfoxonium chloride **C** as indicated by NMR analysis. The diastereotopic relationship between the two methyl groups and the presence of a singlet proton signal at 9.28 ppm are indicative of this structure.

$^1\text{H}$  NMR (400 MHz,  $\text{CDCl}_3$ )  $\delta$  9.28 (s, 1H), 8.01 (d,  $J = 4.0$  Hz, 2H), 7.75 (d,  $J = 8.0$  Hz, 2H), 7.52 – 7.44 (m, 4H), 7.37 (t,  $J = 8.0$  Hz, 2H), 4.29 (s, 3H), 3.90 (s, 3H) ppm.

$^{13}\text{C}$  NMR (101 MHz,  $\text{CDCl}_3$ )  $\delta$  190.3, 135.1, 133.3, 131.8, 131.7, 130.3, 130.0, 129.1, 123.6, 75.7, 39.2, 37.9 ppm.

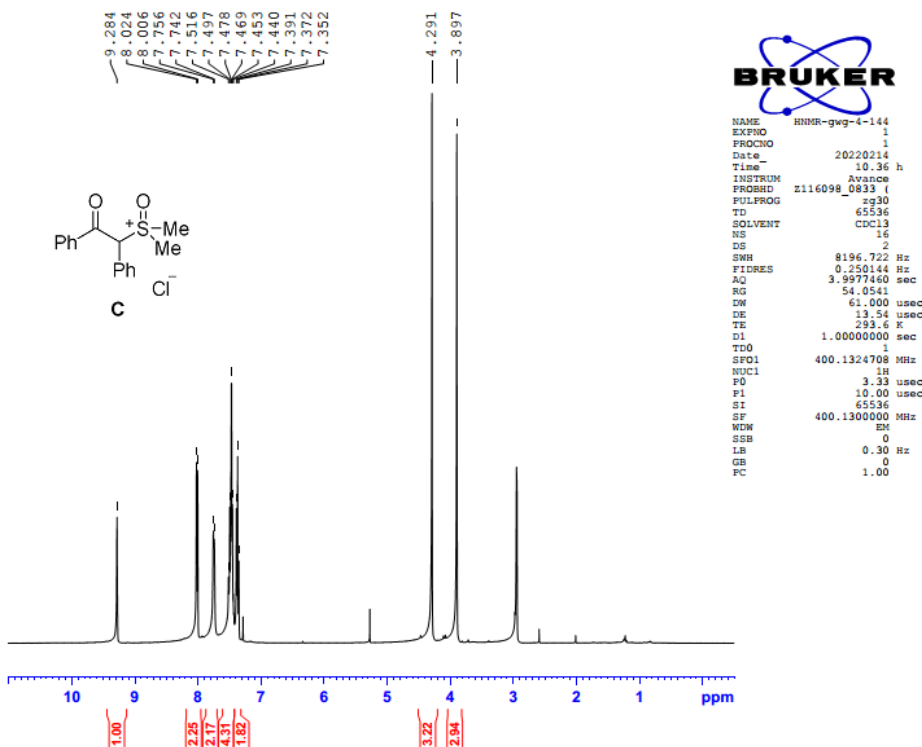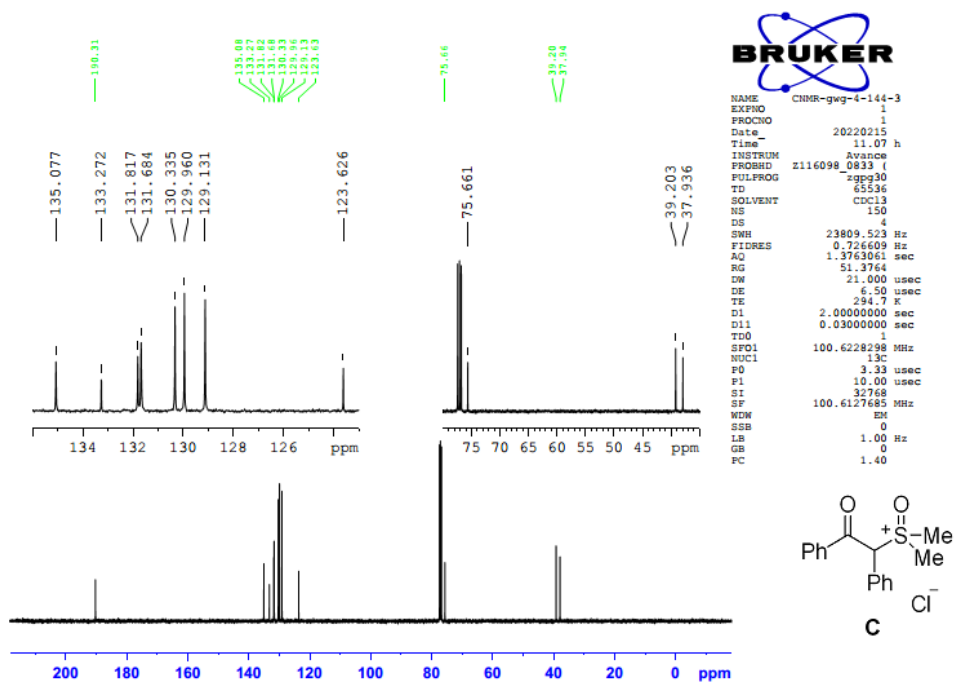



To a 4-mL vial equipped with a magnetic stir bar was added the above *in situ* generated solution of sulfoxonium chloride **C** (0.10 mmol, 1.0 equiv, 0.2 M) in CDCl<sub>3</sub> and *ent*-**SQ3** (13.8 mg, 0.02 mmol, 20 mol%). The vial was carefully sealed with a puncturable screw-cap and cooled to -15 °C. After stirring for 5 min, NaN<sub>3</sub> (7.15 mg, 0.11 mmol, 1.1 equiv) was added, and the reaction mixture was stirred at the same temperature for 120 h. Then, the reaction mixture was directly subjected to flash column chromatography on silica gel (eluent: *n*-hexane/ethyl acetate = 10:1 → 5:1) to give the desired product **2a** (70% yield, 89% ee).

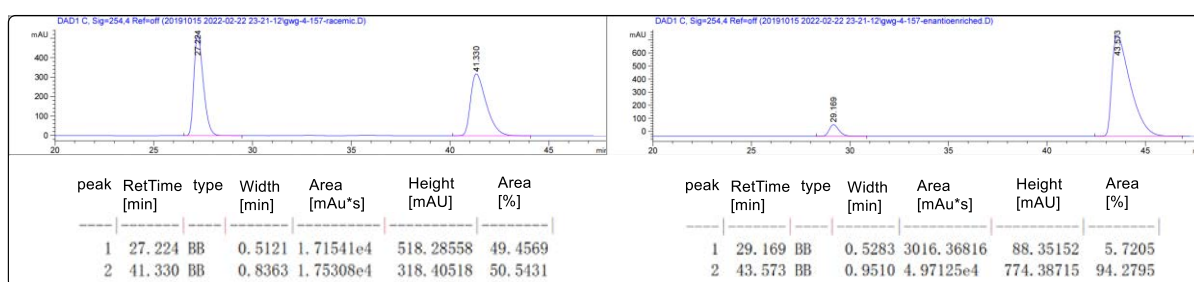

## (8) Unsuccessful substrates for the current research

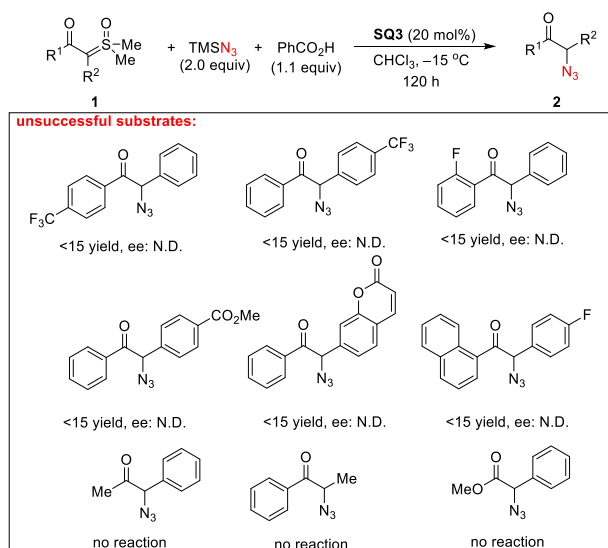

The reaction conditions: sulfoxonium ylide **1** (0.2 mmol), BzOH (0.22 mmol), TMSN<sub>3</sub> (0.4 mmol), **SQ3** (0.04 mmol), CHCl<sub>3</sub> (1.0 mL). Yield was determined by <sup>1</sup>H NMR spectra of the crude mixture using CH<sub>2</sub>Br<sub>2</sub> as an internal standard.

## VI. DFT Calculations

All DFT calculations were carried out with the Gaussian 16 package.<sup>6</sup> All molecular geometries were optimized with the B3LYP-D3(BJ) method and the 6-31G(d) basis set was used for all atoms involved.<sup>7</sup> Single point energies were calculated at B3LYP-D3(BJ)/6-311G(d,p)/SMD(CHCl<sub>3</sub>) level of theory with the optimized structure.<sup>8</sup> The reported free energies and electronic energies were obtained from the above-mentioned single-point calculations combined with the liquid-phase free-energy and ZPE corrections, respectively. Frequency analysis were then performed on the optimized structure. Intrinsic reaction coordinate (IRC) calculation was carried out on the transition state geometries to verify that they are connected to the expected minima.<sup>9</sup> The conformational search was employed with CREST.<sup>10</sup> All energies discussed are Gibbs free relative energies at 298.15 K and 1 atm in kcal mol<sup>-1</sup>. 3D structures shown in figures were generated by CYLview.<sup>11</sup> In order to reduce the computational effort, a simplified **SQ3** was employed in which a phenyl group was instead in place of a 1-pyrenyl group.

---

(6) M. J. Frisch, G. W. Trucks, H. B. Schlegel, G. E. Scuseria, M. A. Robb, J. R. Cheeseman, G. Scalmani, V. Barone, G. A. Petersson, H. Nakatsuji, X. Li, M. Caricato, A. V. Marenich, J. Bloino, B. G. Janesko, R. Gomperts, B. Mennucci, H. P. Hratchian, J. V. Ortiz, A. F. Izmaylov, J. L. Sonnenberg, D. Williams-Young, F. Ding, F. Lipparini, F. Egidi, J. Goings, B. Peng, A. Petrone, T. Henderson, D. Ranasinghe, V. G. Zakrzewski, J. Gao, N. Rega, G. Zheng, W. Liang, M. Hada, M. Ehara, K. Toyota, R. Fukuda, J. Hasegawa, M. Ishida, T. Nakajima, Y. Honda, O. Kitao, H. Nakai, T. Vreven, K. Throssell, J. A. Montgomery, J. E. Peralta, F. Ogliaro, M. J. Bearpark, J. J. Heyd, E. N. Brothers, K. N. Kudin, V. N. Staroverov, T. A. Keith, R. Kobayashi, J. Normand, K. Raghavachari, A. P. Rendell, J. C. Burant, S. S. Iyengar, J. Tomasi, M. Cossi, J. M. Millam, M. Klene, C. Adamo, R. Cammi, J. W. Ochterski, R. L. Martin, K. Morokuma, O. Farkas, J. B. Foresman, D. J. Fox, *Gaussian 16 Revision C.01*, Gaussian, Inc., Wallingford CT, **2019**.

(7) (a) S. Grimme, J. Antony, S. Ehrlich, H. A. Krieg, *J. Chem. Phys.*, **2010**, *132*, 154104–154119;

(b) S. Grimme, S. Ehrlich, L. Goerigk, *J. Comput. Chem.*, **2011**, *32*, 1456–1465.

(8) (a) Y. Zhao, D. G. Truhlar, *Theor. Chem. Acc.*, **2008**, *120*, 215–241; (b) A. V. Marenich, C. J. Cramer, D. G. Truhlar, *J. Phys. Chem., B*, **2009**, *113*, 6378–6396.

(9) C. Gonzalez, H. B. Schlegel, *J. Chem. Phys.*, **1989**, *90*, 2154–2161.

(10) P. Pracht, F. Bohle, S. Grimme, *Phys. Chem. Chem. Phys.*, **2020**, *22*, 7169–7192.

(11) C. Y. Legault, CYLview, 1.0b, Université de Sherbrooke, **2009**, <http://www.cylview.org>.

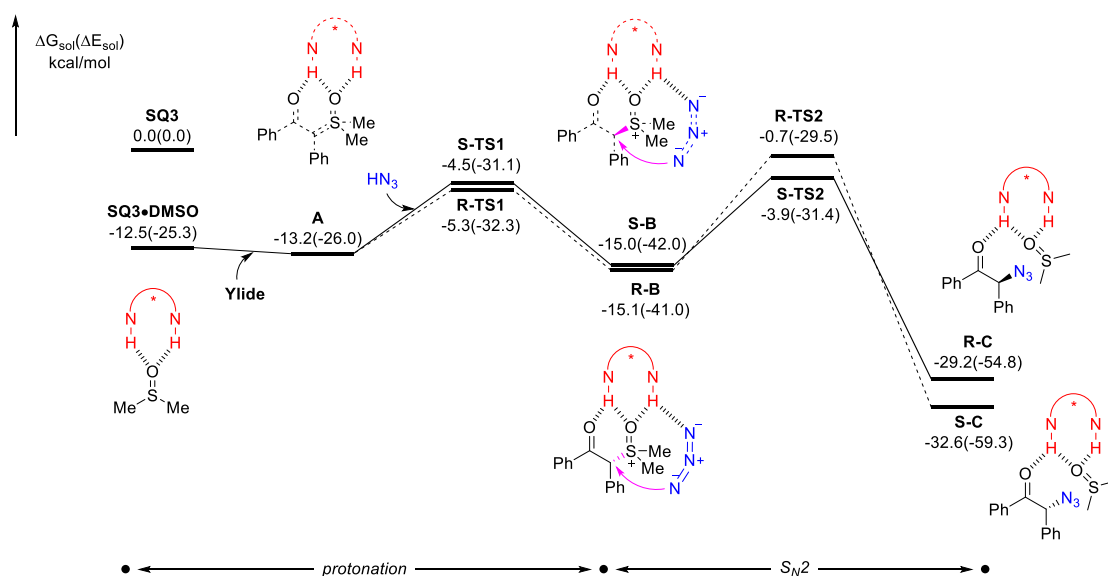

**Figure S1.** Complete energetic profiles of the asymmetric azidation of sulfur ylides at the B3LYP-D3(BJ)/6-311G(d,p)/SMD(CHCl<sub>3</sub>)/B3LYP-D3(BJ)/6-31G(d) level of theory (kcal/mol).

The reaction starts from the solvent replacement by the sulfoxonium ylide to generate complex **A** through hydrogen-bonding interactions (Figure S1). The subsequent protonation by in situ generated HN<sub>3</sub> leads to intermediate **B** with multiple isomers (Scheme S1). Among them, **S-B** and **R-B** are the preferable isomers. The protonation step is reversible, as indicated by the low energy barrier and the similar energies of SQ3·DMSO, **A**, **S-B** and **R-B**. The  $\pi$ - $\pi$  stacking interaction in **R-TS1** between SQ3 and ylide results in relatively lower energy barrier (Figure S1). The subsequent  $S_N2$  azide substitution is the rate-determining ( $\Delta G^{\ddagger} = 11.2$  kcal/mol) and enantio-determining step ( $\Delta\Delta G^{\ddagger} = 3.2$  kcal/mol). The energy barrier of **S-TS2** to form *R*-configuration product is 3.2 kcal/mol lower than **R-TS2**, which is fundamentally consistent with the *ee* value according to Arrhenius equation. The stability of **S-TS2** might be attributed to the hydrogen bond interactions between N-H motifs of SQ3 and azide (Scheme S3, N··H1 = 1.91 Å, N··H2 = 1.92 Å) while there is only one N-H··N weak interaction in **R-TS2** (N··H = 1.89 Å). On the other hand, the steric repulsion between azide and carbonyl moiety of the substrate in **R-TS2** leads to higher activation

energy according to NCI analysis.

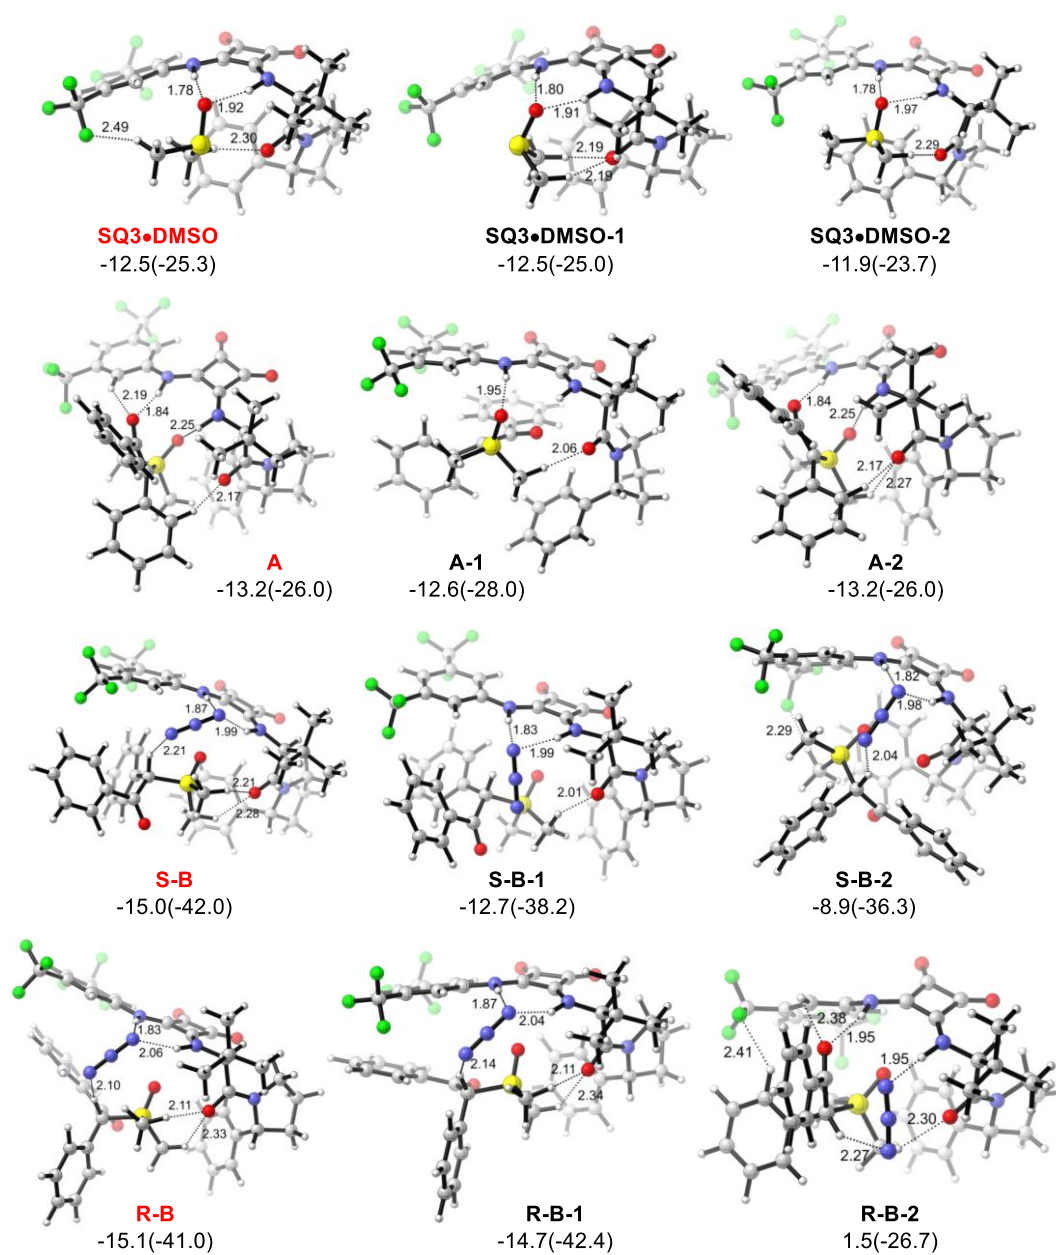

**Scheme S1.** Multiple isomers of the key intermediates.

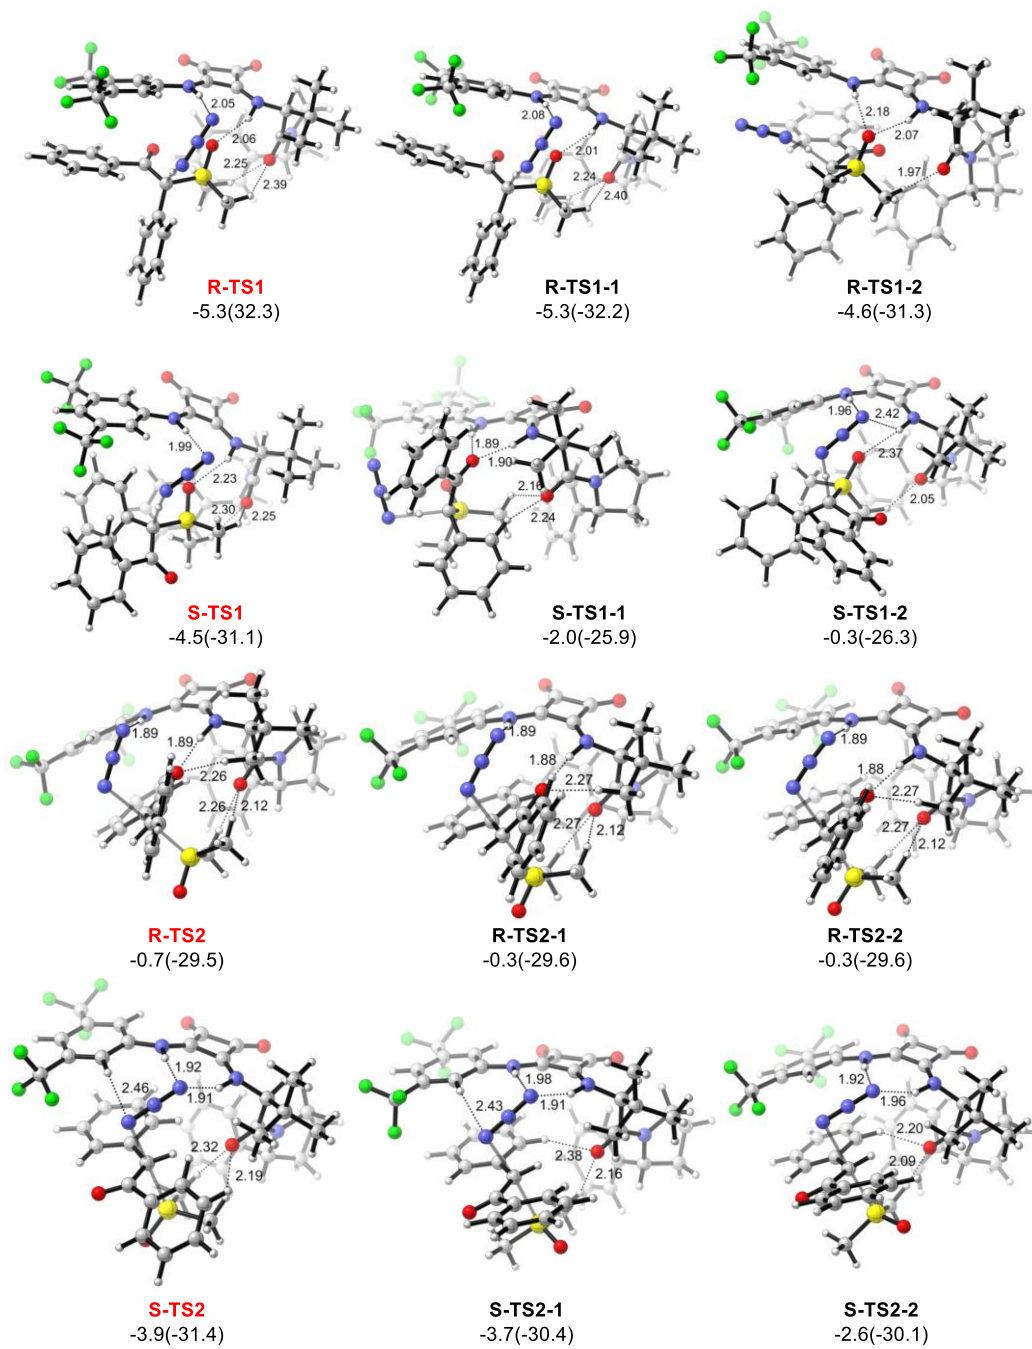

Scheme S2. Multiple isomers of the key transition states.

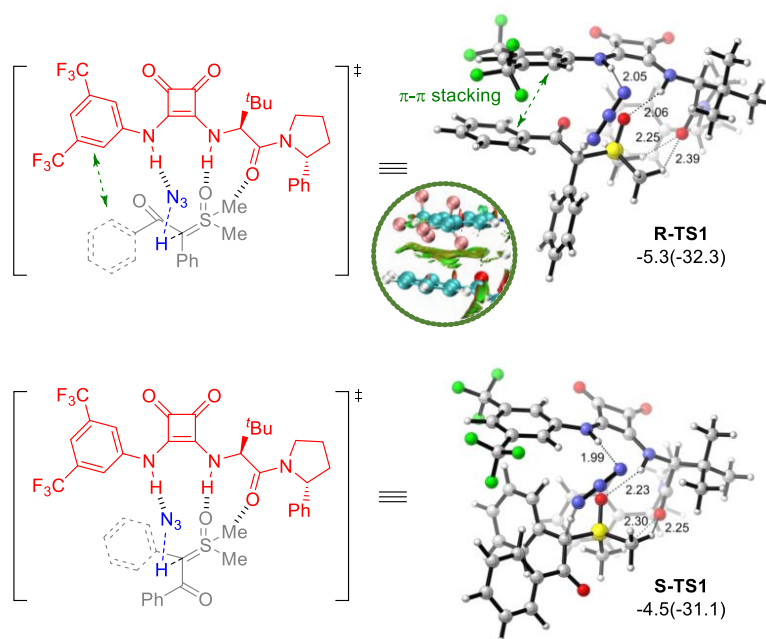

**Scheme S3.** Computed geometries of the transition states for protonation step.

## Energies

**Table S1.** Absolute electronic energies, thermal corrections to energies and free energies at 298.15 K (in Hartree) of all stationary points. Geometries were optimized in the level of B3LYP-D3(BJ)/6-31G(d). Free energies were obtained from the single point calculation at the level of B3LYP-D3(BJ)/6-311G(d,p)/SMD(CHCl<sub>3</sub>) combined with the free-energy correction mentioned above.

|            | E            | E+ZPE        | G            |
|------------|--------------|--------------|--------------|
| Cat        | -2072.420308 | -2072.456744 | -2072.527697 |
| Ylide      | -1167.904295 | -1167.922147 | -1167.969457 |
| HN3        | -164.8082343 | -164.8114563 | -164.8344543 |
| DMSO       | -553.1979785 | -553.2036265 | -553.2319645 |
| SQ3·DMSO   | -2625.658539 | -2625.701653 | -2625.779596 |
| SQ3·DMSO-1 | -2625.658052 | -2625.701118 | -2625.779509 |
| SQ3·DMSO-2 | -2625.656045 | -2625.699475 | -2625.778585 |
| A          | -3240.366012 | -3240.421932 | -3240.518151 |
| A-1        | -3240.369242 | -3240.42471  | -3240.517154 |

|                |              |              |              |
|----------------|--------------|--------------|--------------|
| <b>A-2</b>     | -3240.366011 | -3240.42193  | -3240.518138 |
| <b>S-TS1</b>   | -3405.182368 | -3405.241546 | -3405.338749 |
| <b>S-TS1-1</b> | -3405.174054 | -3405.233575 | -3405.334801 |
| <b>S-TS1-2</b> | -3405.174719 | -3405.233917 | -3405.33214  |
| <b>S-B</b>     | -3405.199708 | -3405.258703 | -3405.355438 |
| <b>S-B-1</b>   | -3405.193753 | -3405.253198 | -3405.351864 |
| <b>S-B-2</b>   | -3405.190719 | -3405.249745 | -3405.345855 |
| <b>S-TS2</b>   | -3405.182802 | -3405.241709 | -3405.337868 |
| <b>S-TS2-1</b> | -3405.18125  | -3405.240358 | -3405.337521 |
| <b>S-TS2-2</b> | -3405.180813 | -3405.239669 | -3405.335744 |
| <b>R-C</b>     | -3405.220216 | -3405.280052 | -3405.378073 |
| <b>R-TS1</b>   | -3405.184379 | -3405.243395 | -3405.340075 |
| <b>R-TS1-1</b> | -3405.184135 | -3405.243161 | -3405.340036 |
| <b>R-TS1-2</b> | -3405.182649 | -3405.241863 | -3405.338927 |
| <b>R-B</b>     | -3405.198175 | -3405.257269 | -3405.355595 |
| <b>R-B-1</b>   | -3405.200399 | -3405.259283 | -3405.354995 |
| <b>R-B-2</b>   | -3405.175322 | -3405.234281 | -3405.329257 |
| <b>R-TS2</b>   | -3405.179803 | -3405.238078 | -3405.332671 |
| <b>R-TS2-1</b> | -3405.180027 | -3405.238253 | -3405.332055 |
| <b>R-TS2-2</b> | -3405.180032 | -3405.238259 | -3405.332069 |
| <b>S-C</b>     | -3405.227296 | -3405.286902 | -3405.383548 |

**Table S2.** Relative electronic energies, thermal corrections to energies and free energies at 298.15 K (in kcal/mol) of all stationary points. Geometries were optimized in the level of B3LYP-D3(BJ)/6-31G(d). Free energies were obtained from the single point calculation at the level of B3LYP-D3(BJ)/6-311G(d,p)/SMD(CHCl<sub>3</sub>) combined with the free-energy correction mentioned above.

|  | <b>E</b> | <b>E+ZPE</b> | <b>G</b> |
|--|----------|--------------|----------|
|--|----------|--------------|----------|

---

|                   |       |       |       |
|-------------------|-------|-------|-------|
| <b>SQ3·DMSO</b>   | -25.3 | -25.9 | -12.5 |
| <b>SQ3·DMSO-1</b> | -25.0 | -25.6 | -12.5 |
| <b>SQ3·DMSO-2</b> | -23.7 | -24.5 | -11.9 |
| <b>A</b>          | -26.0 | -27.0 | -13.2 |
| <b>A-1</b>        | -28.0 | -28.8 | -12.6 |
| <b>A-2</b>        | -26.0 | -27.0 | -13.2 |
| <b>S-TS1</b>      | -31.1 | -32.1 | -4.5  |
| <b>S-TS1-1</b>    | -25.9 | -27.1 | -2.0  |
| <b>S-TS1-2</b>    | -26.3 | -27.3 | -0.3  |
| <b>S-B</b>        | -42.0 | -42.9 | -15.0 |
| <b>S-B-1</b>      | -38.2 | -39.4 | -12.7 |
| <b>S-B-2</b>      | -36.3 | -37.3 | -8.9  |
| <b>S-TS2</b>      | -31.4 | -32.2 | -3.9  |
| <b>S-TS2-1</b>    | -30.4 | -31.4 | -3.7  |
| <b>S-TS2-2</b>    | -30.1 | -30.9 | -2.6  |
| <b>R-C</b>        | -54.8 | -56.3 | -29.2 |
| <b>R-TS1</b>      | -32.3 | -33.3 | -5.3  |
| <b>R-TS1-1</b>    | -32.2 | -33.1 | -5.3  |
| <b>R-TS1-2</b>    | -31.3 | -32.3 | -4.6  |
| <b>R-B</b>        | -41.0 | -42.0 | -15.1 |
| <b>R-B-1</b>      | -42.4 | -43.3 | -14.7 |
| <b>R-B-2</b>      | -26.7 | -27.6 | 1.5   |
| <b>R-TS2</b>      | -29.5 | -30.0 | -0.7  |
| <b>R-TS2-1</b>    | -29.6 | -30.1 | -0.3  |
| <b>R-TS2-2</b>    | -29.6 | -30.1 | -0.3  |
| <b>S-C</b>        | -59.3 | -60.6 | -32.6 |

---



## Cartesian Coordinates (Å)

Cat

|   |             |             |             |
|---|-------------|-------------|-------------|
| C | 1.98656000  | -2.70607200 | -0.63434100 |
| C | 0.42933200  | -2.68979500 | -0.53836600 |
| C | 0.50588700  | -1.35397000 | -1.23897600 |
| C | 1.87692100  | -1.47904400 | -1.44789400 |
| O | 2.89081900  | -3.32573700 | -0.11363500 |
| O | -0.43829100 | -3.40034700 | -0.08918100 |
| N | -0.25572500 | -0.25403300 | -1.44810500 |
| H | 0.29278600  | 0.60741500  | -1.45756200 |
| N | 2.80393900  | -0.66201800 | -2.04364500 |
| H | 2.35146700  | 0.12249700  | -2.50805100 |
| C | -1.61450100 | -0.08442700 | -1.15920400 |
| C | -2.46356700 | -1.15996000 | -0.88158400 |
| C | -2.11316800 | 1.22304300  | -1.13554900 |
| C | -3.79338200 | -0.90557400 | -0.55594400 |
| H | -2.08362300 | -2.17459700 | -0.85477200 |
| C | -3.44688900 | 1.45118600  | -0.81654600 |
| H | -1.45308200 | 2.05973000  | -1.33792500 |
| C | -4.30286200 | 0.39103500  | -0.52165200 |
| H | -5.34043400 | 0.57105600  | -0.27033300 |
| C | -3.94822000 | 2.86230800  | -0.68933500 |
| C | -4.65821800 | -2.05099500 | -0.10681100 |
| F | -4.34764600 | -3.20116400 | -0.73444800 |
| F | -5.96976200 | -1.80743500 | -0.31617500 |
| F | -4.50603900 | -2.27094700 | 1.22454200  |
| F | -5.24452800 | 2.96984000  | -1.04623800 |
| F | -3.23893400 | 3.72434100  | -1.44829900 |
| F | -3.85884400 | 3.30306100  | 0.59236000  |
| C | 3.79686200  | -0.13197100 | -1.08254100 |
| H | 4.24486600  | -1.00201300 | -0.59800700 |
| C | 4.91026300  | 0.67283500  | -1.80934400 |
| C | 5.86748800  | 1.27478900  | -0.76587800 |
| H | 6.37242600  | 0.49382000  | -0.18621800 |
| H | 6.64551400  | 1.85931600  | -1.26820700 |
| H | 5.34783700  | 1.94325900  | -0.07006700 |
| C | 4.32287400  | 1.81326400  | -2.66165800 |
| H | 3.70403500  | 2.48808300  | -2.06524700 |
| H | 5.13847200  | 2.39086800  | -3.10997000 |
| H | 3.71520100  | 1.42904500  | -3.48903900 |
| C | 5.68850900  | -0.29761500 | -2.71345300 |
| H | 6.15993100  | -1.09344500 | -2.12490900 |
| H | 5.02591700  | -0.76820000 | -3.44508400 |
| H | 6.47807800  | 0.23699600  | -3.25347600 |

|   |             |             |             |
|---|-------------|-------------|-------------|
| C | 2.96670600  | 0.68817000  | -0.06845100 |
| O | 2.08048400  | 1.45203600  | -0.48560500 |
| N | 3.15474500  | 0.47710200  | 1.24777600  |
| C | 2.27915500  | 1.15084400  | 2.23756900  |
| C | 4.19785900  | -0.33550900 | 1.89179900  |
| C | 2.93913400  | 0.79005700  | 3.59326400  |
| H | 2.33023500  | 2.22760300  | 2.04784200  |
| C | 4.37116700  | 0.36636500  | 3.24091300  |
| H | 3.85550000  | -1.37193900 | 2.00790400  |
| H | 2.89248700  | 1.62686300  | 4.29466800  |
| H | 5.01545000  | 1.24416600  | 3.11425000  |
| H | 4.82394000  | -0.28374700 | 3.99441200  |
| H | 5.11248700  | -0.34287600 | 1.30210000  |
| H | 2.40025600  | -0.04842900 | 4.04496900  |
| C | 0.83113300  | 0.70863500  | 2.15667400  |
| C | -0.19558500 | 1.65482000  | 2.14743700  |
| C | 0.49776500  | -0.65204000 | 2.16650500  |
| C | -1.53356700 | 1.25583500  | 2.18258700  |
| H | 0.05483600  | 2.71217400  | 2.11211800  |
| C | -0.83647700 | -1.05444500 | 2.19239200  |
| H | 1.28363000  | -1.40360200 | 2.15480000  |
| C | -1.85587300 | -0.09996700 | 2.21503300  |
| H | -2.32038300 | 2.00251600  | 2.15385900  |
| H | -1.08052000 | -2.11146600 | 2.17653100  |
| H | -2.89216700 | -0.42013400 | 2.22502300  |

### Ylide

|   |             |             |             |
|---|-------------|-------------|-------------|
| C | -3.57066000 | 0.44897700  | 0.96109400  |
| C | -2.21265300 | 0.14086300  | 0.89403300  |
| C | -1.76738800 | -0.93089400 | 0.10923000  |
| C | -2.70879900 | -1.69510700 | -0.59462500 |
| C | -4.06293500 | -1.37702500 | -0.54082000 |
| C | -4.49800500 | -0.30196000 | 0.23757400  |
| H | -3.90407800 | 1.27729700  | 1.58029400  |
| H | -1.50324900 | 0.72906200  | 1.46274300  |
| H | -2.35243300 | -2.53959900 | -1.17438600 |
| H | -4.78093700 | -1.96968600 | -1.10113300 |
| H | -5.55507800 | -0.05426300 | 0.28411000  |
| C | -0.32969900 | -1.36304500 | 0.00785100  |
| C | 0.71735000  | -0.38635600 | 0.16888000  |
| O | -0.09224900 | -2.56862800 | -0.20666200 |
| S | 2.27372600  | -1.03669200 | -0.09957700 |
| O | 2.75158400  | -1.41337200 | -1.45746200 |
| C | 3.43445000  | 0.18666900  | 0.55307000  |

|   |             |             |             |
|---|-------------|-------------|-------------|
| H | 3.23635300  | 0.38586300  | 1.60619300  |
| H | 4.42985700  | -0.23628000 | 0.40430400  |
| H | 3.31854400  | 1.09686600  | -0.03516900 |
| C | 2.53870000  | -2.43287100 | 1.02256000  |
| H | 3.55522800  | -2.79148700 | 0.84792400  |
| H | 2.39681000  | -2.09310000 | 2.04982400  |
| H | 1.79198100  | -3.17452200 | 0.74573700  |
| C | 0.57411700  | 1.08524600  | -0.01970500 |
| C | 0.81237900  | 1.98664800  | 1.03096700  |
| C | 0.16882600  | 1.60516900  | -1.25941200 |
| C | 0.65667500  | 3.36018700  | 0.85106900  |
| H | 1.09976900  | 1.59440100  | 2.00302800  |
| C | -0.00059000 | 2.97730900  | -1.44048700 |
| H | -0.01839300 | 0.91572400  | -2.07667900 |
| C | 0.24688500  | 3.85887700  | -0.38707300 |
| H | 0.84286400  | 4.03969000  | 1.67831900  |
| H | -0.32129500 | 3.35870000  | -2.40584800 |
| H | 0.11783700  | 4.92826700  | -0.52828100 |

### HN3

|   |             |             |            |
|---|-------------|-------------|------------|
| N | 0.11256200  | 1.12756200  | 0.00000000 |
| H | 1.10126400  | 1.38871200  | 0.00000000 |
| N | 0.00000000  | -0.10961400 | 0.00000000 |
| N | -0.26988500 | -1.21633600 | 0.00000000 |

### DMSO

|   |             |             |             |
|---|-------------|-------------|-------------|
| S | 0.25814200  | 0.43272000  | 0.00000000  |
| O | -1.09424300 | 1.10685400  | 0.00000000  |
| C | 0.25814200  | -0.80146400 | 1.35869600  |
| H | 1.17707400  | -1.39438000 | 1.32367900  |
| H | 0.21036000  | -0.24488400 | 2.29741700  |
| H | -0.62445200 | -1.44112900 | 1.26650700  |
| C | 0.25814200  | -0.80146400 | -1.35869600 |
| H | 0.21036000  | -0.24488400 | -2.29741700 |
| H | 1.17707400  | -1.39438000 | -1.32367900 |
| H | -0.62445200 | -1.44112900 | -1.26650700 |

### SQ3 • DMSO

|   |             |             |            |
|---|-------------|-------------|------------|
| C | -1.86389400 | -1.35580400 | 2.34250600 |
| C | -0.34975500 | -1.61979700 | 2.37519500 |
| C | -0.16924300 | -0.19536800 | 1.97175000 |
| C | -1.55478400 | 0.03648200  | 1.93521100 |
| O | -2.87909500 | -2.01602900 | 2.48261700 |
| O | 0.36368500  | -2.59159500 | 2.54360600 |

|   |             |             |             |
|---|-------------|-------------|-------------|
| N | 0.83731000  | 0.65061400  | 1.64338500  |
| H | 0.52191200  | 1.57641900  | 1.31620500  |
| N | -2.31155200 | 1.08579800  | 1.56818100  |
| H | -1.79307000 | 1.84817100  | 1.11687900  |
| C | 2.13268000  | 0.32534000  | 1.24358800  |
| C | 2.64179700  | -0.98022500 | 1.23968300  |
| C | 2.92935500  | 1.37456500  | 0.76223700  |
| C | 3.90148000  | -1.21719000 | 0.69546800  |
| H | 2.06007900  | -1.79738500 | 1.65518100  |
| C | 4.18625900  | 1.11164700  | 0.22607700  |
| H | 2.54900400  | 2.39041900  | 0.79801400  |
| C | 4.68537000  | -0.18856700 | 0.17230200  |
| H | 5.65599800  | -0.39370500 | -0.25813100 |
| C | 4.95805600  | 2.26440800  | -0.34842200 |
| C | 4.36468500  | -2.64680600 | 0.61546500  |
| F | 3.60490900  | -3.35196200 | -0.26479200 |
| F | 4.26316800  | -3.27471800 | 1.80217300  |
| F | 5.64503500  | -2.74918700 | 0.20271900  |
| F | 4.32418400  | 2.77337000  | -1.44413100 |
| F | 6.19870400  | 1.91913100  | -0.73633400 |
| F | 5.06707400  | 3.28429300  | 0.52989700  |
| C | -3.63043800 | 0.80535300  | 0.97581600  |
| H | -4.06759600 | -0.00233100 | 1.56262100  |
| C | -4.58165600 | 2.02693100  | 1.06308700  |
| C | -5.89981600 | 1.65310100  | 0.36318100  |
| H | -5.74785300 | 1.45755900  | -0.70456600 |
| H | -6.35275200 | 0.76231700  | 0.81479500  |
| H | -6.62049600 | 2.47319700  | 0.45104300  |
| C | -3.98733900 | 3.28140600  | 0.39839500  |
| H | -3.05271800 | 3.59150400  | 0.87765900  |
| H | -3.78198000 | 3.11410600  | -0.66096200 |
| H | -4.69610500 | 4.11211400  | 0.49248000  |
| C | -4.85177600 | 2.31187800  | 2.54981000  |
| H | -5.31487200 | 1.44808800  | 3.04170100  |
| H | -3.92283600 | 2.54398600  | 3.07912200  |
| H | -5.53034600 | 3.16571100  | 2.65581200  |
| C | -3.34418300 | 0.33130900  | -0.46113100 |
| O | -2.63744100 | 1.02536200  | -1.20554600 |
| N | -3.77103900 | -0.89077800 | -0.84976200 |
| C | -3.28625700 | -1.43338500 | -2.13662000 |
| C | -4.70815700 | -1.79745400 | -0.15909200 |
| C | -4.18042900 | -2.67625300 | -2.34111300 |
| H | -3.45548400 | -0.68940500 | -2.91961100 |
| C | -4.53507500 | -3.11985900 | -0.91512300 |

|   |             |             |             |
|---|-------------|-------------|-------------|
| H | -4.45539800 | -1.89378600 | 0.89743500  |
| H | -5.08857500 | -2.38517100 | -2.88212100 |
| H | -5.43496800 | -3.73900600 | -0.86991800 |
| H | -3.71240500 | -3.69250600 | -0.47604600 |
| H | -5.73311800 | -1.41717900 | -0.25525000 |
| H | -3.67195400 | -3.44932800 | -2.92183100 |
| C | -1.79671300 | -1.74151600 | -2.09333700 |
| C | -1.00948000 | -1.50367000 | -3.22471700 |
| C | -1.18570700 | -2.27366100 | -0.95139300 |
| C | 0.35949600  | -1.77516900 | -3.21319300 |
| H | -1.47067800 | -1.08194800 | -4.11495700 |
| C | 0.18313000  | -2.54521000 | -0.93522500 |
| H | -1.77662600 | -2.46633700 | -0.06285300 |
| C | 0.96314200  | -2.28874600 | -2.06377300 |
| H | 0.95608000  | -1.57435800 | -4.09919600 |
| H | 0.63740400  | -2.95639700 | -0.04005000 |
| H | 2.02906100  | -2.49030800 | -2.03832700 |
| S | -0.36102600 | 2.98207700  | -1.10816000 |
| O | -0.31378300 | 2.87098500  | 0.43479400  |
| C | 0.31188500  | 1.43334500  | -1.78391300 |
| H | 0.35295500  | 1.52866100  | -2.87218900 |
| H | 1.30631100  | 1.24007800  | -1.37649000 |
| H | -0.39223700 | 0.64548600  | -1.52277300 |
| C | 1.04696100  | 4.05905700  | -1.54303200 |
| H | 1.99561800  | 3.61808100  | -1.23044300 |
| H | 1.04317200  | 4.21253300  | -2.62642200 |
| H | 0.88569400  | 5.01306000  | -1.03653800 |

### SQ3 • DMSO-1

|   |             |             |             |
|---|-------------|-------------|-------------|
| C | 1.77437700  | -1.39091500 | -2.33716800 |
| C | 0.25612400  | -1.61562100 | -2.40699300 |
| C | 0.10171200  | -0.19012700 | -2.00175100 |
| C | 1.49129300  | 0.00137500  | -1.90665700 |
| O | 2.77736700  | -2.06966200 | -2.47877200 |
| O | -0.47646800 | -2.56978700 | -2.59373400 |
| N | -0.89803100 | 0.68411000  | -1.72490300 |
| H | -0.56939500 | 1.61746100  | -1.44207100 |
| N | 2.26232600  | 1.01860400  | -1.48889800 |
| H | 1.76158300  | 1.77317200  | -1.00237900 |
| C | -2.18971300 | 0.38353200  | -1.28802700 |
| C | -2.71053800 | -0.91699300 | -1.25853500 |
| C | -2.96167700 | 1.44515600  | -0.79174600 |
| C | -3.95655700 | -1.13786300 | -0.67723400 |
| H | -2.14966100 | -1.74278300 | -1.68542200 |

|   |             |             |             |
|---|-------------|-------------|-------------|
| C | -4.20510100 | 1.19777800  | -0.21809200 |
| H | -2.58068900 | 2.46006300  | -0.84479800 |
| C | -4.71450600 | -0.09735200 | -0.14062400 |
| H | -5.67523100 | -0.28890000 | 0.31767100  |
| C | -4.94456500 | 2.35408500  | 0.39502700  |
| C | -4.43048200 | -2.56191300 | -0.57018100 |
| F | -3.66668300 | -3.25901400 | 0.31416500  |
| F | -4.34602900 | -3.21037700 | -1.74701700 |
| F | -5.70675800 | -2.64782900 | -0.14204700 |
| F | -6.22686600 | 2.05179400  | 0.67846500  |
| F | -4.94569500 | 3.43387200  | -0.41706900 |
| F | -4.35797300 | 2.74378800  | 1.55498400  |
| C | 3.60706300  | 0.71233400  | -0.97369800 |
| H | 3.97448500  | -0.12855000 | -1.56083000 |
| C | 4.59916900  | 1.88694800  | -1.16801300 |
| C | 5.95091700  | 1.46657700  | -0.56566700 |
| H | 6.33020800  | 0.55201700  | -1.03707900 |
| H | 6.69674000  | 2.25390800  | -0.71913500 |
| H | 5.87234700  | 1.28928900  | 0.51340100  |
| C | 4.11952500  | 3.18433400  | -0.49533000 |
| H | 4.06445100  | 3.07337800  | 0.58949800  |
| H | 4.82119700  | 3.99428100  | -0.72531800 |
| H | 3.13195500  | 3.48962200  | -0.85701700 |
| C | 4.75890400  | 2.12315100  | -2.67922700 |
| H | 5.12290100  | 1.22120800  | -3.18555000 |
| H | 3.80478900  | 2.40421800  | -3.13484300 |
| H | 5.47838100  | 2.92865900  | -2.86377200 |
| C | 3.38914500  | 0.28412900  | 0.48824200  |
| O | 2.78003000  | 1.03634100  | 1.26434200  |
| N | 3.73965100  | -0.96448000 | 0.86371000  |
| C | 3.24098200  | -1.48267900 | 2.15566200  |
| C | 4.61031800  | -1.92403800 | 0.15585900  |
| C | 4.07917900  | -2.76386400 | 2.35520500  |
| H | 3.44756700  | -0.74661700 | 2.93662000  |
| C | 4.39330400  | -3.23159600 | 0.92719100  |
| H | 4.32673000  | -2.01610800 | -0.89318100 |
| H | 5.00685100  | -2.51146300 | 2.88232300  |
| H | 5.26629000  | -3.88743100 | 0.87382600  |
| H | 3.54191100  | -3.77439100 | 0.50569800  |
| H | 5.65426400  | -1.59258500 | 0.22221500  |
| H | 3.54385300  | -3.50970600 | 2.94726300  |
| C | 1.73853900  | -1.72276100 | 2.11179300  |
| C | 0.95798500  | -1.43855200 | 3.23697800  |
| C | 1.10905400  | -2.23918500 | 0.97250800  |

|   |             |             |             |
|---|-------------|-------------|-------------|
| C | -0.42060900 | -1.65693600 | 3.22406300  |
| H | 1.43303100  | -1.02725200 | 4.12482300  |
| C | -0.26871200 | -2.45868500 | 0.95509300  |
| H | 1.69292900  | -2.46217600 | 0.08658800  |
| C | -1.04061100 | -2.16224400 | 2.07959300  |
| H | -1.01132700 | -1.42334800 | 4.10592400  |
| H | -0.73687300 | -2.86231100 | 0.06348200  |
| H | -2.11270400 | -2.32773800 | 2.05518300  |
| S | -0.23998300 | 3.09031300  | 0.95052900  |
| O | 0.28820900  | 2.87948700  | -0.48920700 |
| C | 1.17868300  | 3.72942500  | 1.89180600  |
| H | 0.87472400  | 3.86587400  | 2.93366900  |
| H | 1.99816300  | 3.01412500  | 1.80112100  |
| H | 1.44457000  | 4.69275800  | 1.45167600  |
| C | -0.33671900 | 1.45512900  | 1.74420200  |
| H | 0.62714800  | 0.95036400  | 1.65868000  |
| H | -0.60595700 | 1.60544100  | 2.79337300  |
| H | -1.12510100 | 0.88596100  | 1.25050700  |

**SQ3 • DMSO-2**

|   |             |             |             |
|---|-------------|-------------|-------------|
| C | 1.77437700  | -1.39091500 | -2.33716800 |
| C | 0.25612400  | -1.61562100 | -2.40699300 |
| C | 0.10171200  | -0.19012700 | -2.00175100 |
| C | 1.49129300  | 0.00137500  | -1.90665700 |
| O | 2.77736700  | -2.06966200 | -2.47877200 |
| O | -0.47646800 | -2.56978700 | -2.59373400 |
| N | -0.89803100 | 0.68411000  | -1.72490300 |
| H | -0.56939500 | 1.61746100  | -1.44207100 |
| N | 2.26232600  | 1.01860400  | -1.48889800 |
| H | 1.76158300  | 1.77317200  | -1.00237900 |
| C | -2.18971300 | 0.38353200  | -1.28802700 |
| C | -2.71053800 | -0.91699300 | -1.25853500 |
| C | -2.96167700 | 1.44515600  | -0.79174600 |
| C | -3.95655700 | -1.13786300 | -0.67723400 |
| H | -2.14966100 | -1.74278300 | -1.68542200 |
| C | -4.20510100 | 1.19777800  | -0.21809200 |
| H | -2.58068900 | 2.46006300  | -0.84479800 |
| C | -4.71450600 | -0.09735200 | -0.14062400 |
| H | -5.67523100 | -0.28890000 | 0.31767100  |
| C | -4.94456500 | 2.35408500  | 0.39502700  |
| C | -4.43048200 | -2.56191300 | -0.57018100 |
| F | -3.66668300 | -3.25901400 | 0.31416500  |
| F | -4.34602900 | -3.21037700 | -1.74701700 |
| F | -5.70675800 | -2.64782900 | -0.14204700 |

|   |             |             |             |
|---|-------------|-------------|-------------|
| F | -6.22686600 | 2.05179400  | 0.67846500  |
| F | -4.94569500 | 3.43387200  | -0.41706900 |
| F | -4.35797300 | 2.74378800  | 1.55498400  |
| C | 3.60706300  | 0.71233400  | -0.97369800 |
| H | 3.97448500  | -0.12855000 | -1.56083000 |
| C | 4.59916900  | 1.88694800  | -1.16801300 |
| C | 5.95091700  | 1.46657700  | -0.56566700 |
| H | 6.33020800  | 0.55201700  | -1.03707900 |
| H | 6.69674000  | 2.25390800  | -0.71913500 |
| H | 5.87234700  | 1.28928900  | 0.51340100  |
| C | 4.11952500  | 3.18433400  | -0.49533000 |
| H | 4.06445100  | 3.07337800  | 0.58949800  |
| H | 4.82119700  | 3.99428100  | -0.72531800 |
| H | 3.13195500  | 3.48962200  | -0.85701700 |
| C | 4.75890400  | 2.12315100  | -2.67922700 |
| H | 5.12290100  | 1.22120800  | -3.18555000 |
| H | 3.80478900  | 2.40421800  | -3.13484300 |
| H | 5.47838100  | 2.92865900  | -2.86377200 |
| C | 3.38914500  | 0.28412900  | 0.48824200  |
| O | 2.78003000  | 1.03634100  | 1.26434200  |
| N | 3.73965100  | -0.96448000 | 0.86371000  |
| C | 3.24098200  | -1.48267900 | 2.15566200  |
| C | 4.61031800  | -1.92403800 | 0.15585900  |
| C | 4.07917900  | -2.76386400 | 2.35520500  |
| H | 3.44756700  | -0.74661700 | 2.93662000  |
| C | 4.39330400  | -3.23159600 | 0.92719100  |
| H | 4.32673000  | -2.01610800 | -0.89318100 |
| H | 5.00685100  | -2.51146300 | 2.88232300  |
| H | 5.26629000  | -3.88743100 | 0.87382600  |
| H | 3.54191100  | -3.77439100 | 0.50569800  |
| H | 5.65426400  | -1.59258500 | 0.22221500  |
| H | 3.54385300  | -3.50970600 | 2.94726300  |
| C | 1.73853900  | -1.72276100 | 2.11179300  |
| C | 0.95798500  | -1.43855200 | 3.23697800  |
| C | 1.10905400  | -2.23918500 | 0.97250800  |
| C | -0.42060900 | -1.65693600 | 3.22406300  |
| H | 1.43303100  | -1.02725200 | 4.12482300  |
| C | -0.26871200 | -2.45868500 | 0.95509300  |
| H | 1.69292900  | -2.46217600 | 0.08658800  |
| C | -1.04061100 | -2.16224400 | 2.07959300  |
| H | -1.01132700 | -1.42334800 | 4.10592400  |
| H | -0.73687300 | -2.86231100 | 0.06348200  |
| H | -2.11270400 | -2.32773800 | 2.05518300  |
| S | -0.23998300 | 3.09031300  | 0.95052900  |



|   |             |            |             |
|---|-------------|------------|-------------|
| O | 0.28820900  | 2.87948700 | -0.48920700 |
| C | 1.17868300  | 3.72942500 | 1.89180600  |
| H | 0.87472400  | 3.86587400 | 2.93366900  |
| H | 1.99816300  | 3.01412500 | 1.80112100  |
| H | 1.44457000  | 4.69275800 | 1.45167600  |
| C | -0.33671900 | 1.45512900 | 1.74420200  |
| H | 0.62714800  | 0.95036400 | 1.65868000  |
| H | -0.60595700 | 1.60544100 | 2.79337300  |
| H | -1.12510100 | 0.88596100 | 1.25050700  |

A

|   |             |             |             |
|---|-------------|-------------|-------------|
| C | -0.18626100 | -2.90034700 | -2.57504500 |
| C | -1.67974600 | -2.64221900 | -2.32558800 |
| C | -1.28607800 | -1.27840600 | -1.84671300 |
| C | 0.07988700  | -1.53897700 | -2.06202000 |
| O | 0.50422100  | -3.82241200 | -2.98209100 |
| O | -2.70752200 | -3.28141800 | -2.43094700 |
| N | -1.88779500 | -0.16071500 | -1.39117400 |
| H | -1.26710100 | 0.62158000  | -1.15402200 |
| N | 1.20703300  | -0.82504500 | -1.88379300 |
| H | 1.15182700  | -0.07455400 | -1.20067600 |
| C | -3.18014400 | -0.01301700 | -0.88065300 |
| C | -4.14842200 | -1.02854900 | -0.89900600 |
| C | -3.48874100 | 1.22392900  | -0.29720000 |
| C | -5.38741600 | -0.79470400 | -0.30580800 |
| H | -3.94114500 | -1.98065400 | -1.37853800 |
| C | -4.72536600 | 1.42126200  | 0.30799000  |
| H | -2.74955100 | 2.01655700  | -0.31492200 |
| C | -5.69110600 | 0.41825100  | 0.31566100  |
| H | -6.65400100 | 0.57627000  | 0.78296300  |
| C | -4.96146900 | 2.74104700  | 0.98279000  |
| C | -6.39314700 | -1.91428100 | -0.26269500 |
| F | -6.32457300 | -2.70047700 | -1.35366600 |
| F | -7.65977300 | -1.44715600 | -0.17314800 |
| F | -6.19398600 | -2.71139700 | 0.81501800  |
| F | -6.18424500 | 2.83060100  | 1.54107400  |
| F | -4.82498100 | 3.77844100  | 0.12788000  |
| F | -4.05186000 | 2.94738800  | 1.97693100  |
| C | 2.51858200  | -1.48043500 | -1.96413000 |
| H | 2.35893800  | -2.41389400 | -2.50108800 |
| C | 3.54132500  | -0.64570200 | -2.78685500 |
| C | 4.91936700  | -1.31824400 | -2.67206100 |
| H | 4.88016800  | -2.36720100 | -2.99111700 |
| H | 5.64585800  | -0.80505700 | -3.31136100 |

|   |             |             |             |
|---|-------------|-------------|-------------|
| H | 5.29776900  | -1.28443500 | -1.64426100 |
| C | 3.62696500  | 0.81017700  | -2.30452900 |
| H | 3.95308700  | 0.87289300  | -1.26509500 |
| H | 4.33869700  | 1.36421000  | -2.92726600 |
| H | 2.66001000  | 1.31430400  | -2.39176800 |
| C | 3.07530800  | -0.66546900 | -4.25235400 |
| H | 3.04046800  | -1.68805300 | -4.64652500 |
| H | 2.07532100  | -0.23104200 | -4.34778100 |
| H | 3.76042300  | -0.08263900 | -4.87810200 |
| C | 2.96579900  | -1.76780100 | -0.52440400 |
| O | 3.10516300  | -0.84054300 | 0.28711800  |
| N | 3.13618600  | -3.05523900 | -0.15296400 |
| C | 3.46531500  | -3.36736300 | 1.24752400  |
| C | 3.09016100  | -4.26214200 | -1.00776900 |
| C | 3.96217400  | -4.82656400 | 1.15846600  |
| H | 4.25704800  | -2.69098500 | 1.58263600  |
| C | 3.12859300  | -5.40677200 | 0.00977400  |
| H | 2.19542200  | -4.27919300 | -1.63237100 |
| H | 5.02706600  | -4.83536100 | 0.89737000  |
| H | 3.55065100  | -6.32087800 | -0.41534000 |
| H | 2.11405600  | -5.63056900 | 0.35640500  |
| H | 3.97243500  | -4.28632000 | -1.66038600 |
| H | 3.83556800  | -5.35953500 | 2.10362900  |
| C | 2.27194300  | -3.21256400 | 2.18032400  |
| C | 2.49878300  | -3.16545600 | 3.56218800  |
| C | 0.95876700  | -3.14491900 | 1.71167000  |
| C | 1.43512500  | -3.06416100 | 4.45712600  |
| H | 3.51886600  | -3.20761500 | 3.93825600  |
| C | -0.11005000 | -3.03767200 | 2.60342600  |
| H | 0.76497300  | -3.14654700 | 0.64549000  |
| C | 0.12234400  | -3.00157600 | 3.97831900  |
| H | 1.62871800  | -3.03242000 | 5.52586200  |
| H | -1.12179200 | -2.97227100 | 2.21492600  |
| H | -0.70960900 | -2.92588900 | 4.67302700  |
| C | 2.86343600  | 5.05584400  | -2.18533300 |
| C | 2.46420500  | 4.02488300  | -1.33747600 |
| C | 1.10066300  | 3.77274500  | -1.12458900 |
| C | 0.15052300  | 4.56606600  | -1.78452000 |
| C | 0.55161500  | 5.60619600  | -2.61781800 |
| C | 1.91086400  | 5.85420200  | -2.82050000 |
| H | 3.92219800  | 5.23348000  | -2.35102000 |
| H | 3.21385900  | 3.40977300  | -0.85759700 |
| H | -0.90017300 | 4.34452300  | -1.63442000 |
| H | -0.19486400 | 6.21925900  | -3.11478500 |

|   |             |             |             |
|---|-------------|-------------|-------------|
| H | 2.22605100  | 6.66165800  | -3.47558900 |
| C | 0.58062500  | 2.65618700  | -0.27263600 |
| C | 1.35025500  | 2.11278700  | 0.78435200  |
| O | -0.57445200 | 2.20403000  | -0.53393400 |
| S | 0.51973400  | 0.81663100  | 1.56704600  |
| O | 0.05352500  | -0.32916600 | 0.74742900  |
| C | 1.59145400  | 0.22272300  | 2.87967300  |
| H | 1.92869500  | 1.05197700  | 3.50077000  |
| H | 1.00034800  | -0.50271000 | 3.44087500  |
| H | 2.42018000  | -0.27988400 | 2.38093800  |
| C | -0.90841500 | 1.45519700  | 2.48891800  |
| H | -1.40019800 | 0.60504800  | 2.96665200  |
| H | -0.54882000 | 2.17754800  | 3.22487400  |
| H | -1.57004800 | 1.92685800  | 1.76483700  |
| C | 2.54639800  | 2.70056200  | 1.43700200  |
| C | 2.45039700  | 3.97662500  | 2.01800700  |
| C | 3.78478700  | 2.03770300  | 1.46961200  |
| C | 3.56200100  | 4.58298100  | 2.59959800  |
| H | 1.49727300  | 4.49666300  | 1.98778000  |
| C | 4.89100600  | 2.63850900  | 2.06960600  |
| H | 3.86694000  | 1.05701200  | 1.01567400  |
| C | 4.78620700  | 3.91246400  | 2.63093600  |
| H | 3.47138300  | 5.57528200  | 3.03240300  |
| H | 5.84259100  | 2.11406900  | 2.08599500  |
| H | 5.65291100  | 4.38111900  | 3.08846700  |

#### A-1

|   |             |             |             |
|---|-------------|-------------|-------------|
| C | -1.58395700 | -3.19005600 | -0.72208100 |
| C | -0.04883800 | -3.26586700 | -0.82960100 |
| C | -0.00612900 | -2.43403900 | 0.40844200  |
| C | -1.40170800 | -2.41236700 | 0.52756000  |
| O | -2.54738900 | -3.51506300 | -1.39625300 |
| O | 0.75595000  | -3.74102600 | -1.60652000 |
| N | 0.91379100  | -1.81248100 | 1.18984400  |
| H | 0.52852100  | -1.16626600 | 1.88066000  |
| N | -2.25673900 | -1.87385200 | 1.40698000  |
| H | -1.92378100 | -1.09328700 | 1.96893600  |
| C | 2.27248300  | -1.61459800 | 0.95100700  |
| C | 2.92837800  | -2.06529800 | -0.20453200 |
| C | 2.98365300  | -0.87848400 | 1.91034300  |
| C | 4.26888100  | -1.73835900 | -0.38891500 |
| H | 2.39504700  | -2.64537700 | -0.95101300 |
| C | 4.32175800  | -0.56282500 | 1.69728700  |
| H | 2.46848800  | -0.51373800 | 2.79121200  |

|   |             |             |             |
|---|-------------|-------------|-------------|
| C | 4.98215100  | -0.98636800 | 0.54537000  |
| H | 6.01605300  | -0.71812900 | 0.36628800  |
| C | 5.05107500  | 0.28353100  | 2.70071700  |
| C | 4.94706400  | -2.08593300 | -1.68555900 |
| F | 4.30530400  | -3.04680500 | -2.36967400 |
| F | 6.22147100  | -2.49373600 | -1.49090600 |
| F | 5.01539700  | -0.99332500 | -2.49619400 |
| F | 5.75521200  | -0.44339900 | 3.58999500  |
| F | 4.19389500  | 1.06019100  | 3.41813200  |
| F | 5.92464600  | 1.12472700  | 2.09552700  |
| C | -3.68810700 | -1.82198000 | 1.09390800  |
| H | -3.82368800 | -2.36827800 | 0.16172000  |
| C | -4.54359400 | -2.54334800 | 2.18281900  |
| C | -6.03457400 | -2.37303900 | 1.84749600  |
| H | -6.27176500 | -2.78267800 | 0.85855500  |
| H | -6.64794400 | -2.90873100 | 2.58019700  |
| H | -6.33818000 | -1.32030100 | 1.86802200  |
| C | -4.26274000 | -1.99136700 | 3.58893100  |
| H | -4.50654100 | -0.92914700 | 3.66024300  |
| H | -4.85830500 | -2.54128900 | 4.32683600  |
| H | -3.20762900 | -2.11705600 | 3.85381700  |
| C | -4.17747500 | -4.03659600 | 2.13379800  |
| H | -4.35950300 | -4.45928200 | 1.13875100  |
| H | -3.12089100 | -4.18744100 | 2.37560300  |
| H | -4.77486600 | -4.59923000 | 2.86015100  |
| C | -4.06558600 | -0.34888300 | 0.92041400  |
| O | -3.78965500 | 0.46910200  | 1.80645500  |
| N | -4.72118300 | 0.01511300  | -0.20553600 |
| C | -5.23641100 | 1.38929200  | -0.33504100 |
| C | -5.11118500 | -0.85686800 | -1.33025900 |
| C | -6.30316600 | 1.23251200  | -1.44238100 |
| H | -5.68631400 | 1.67839300  | 0.61880300  |
| C | -5.73518900 | 0.12038300  | -2.33535600 |
| H | -4.24917600 | -1.39786100 | -1.73014800 |
| H | -7.24854800 | 0.90819900  | -0.99157100 |
| H | -6.49443500 | -0.36179600 | -2.95661700 |
| H | -4.96643600 | 0.52575600  | -3.00050800 |
| H | -5.84898300 | -1.59710400 | -1.00006700 |
| H | -6.48119600 | 2.16939400  | -1.97537500 |
| C | -4.17205200 | 2.41363800  | -0.68752400 |
| C | -3.10969900 | 2.10572800  | -1.54038300 |
| C | -4.28603300 | 3.72073500  | -0.20047800 |
| C | -2.18932800 | 3.08307900  | -1.91485700 |
| H | -2.97787900 | 1.09110300  | -1.88999300 |

|   |             |             |             |
|---|-------------|-------------|-------------|
| C | -3.36581100 | 4.70287800  | -0.56804500 |
| H | -5.10088800 | 3.96894300  | 0.47570400  |
| C | -2.31373400 | 4.38676800  | -1.43197200 |
| H | -1.37346800 | 2.81467000  | -2.57963000 |
| H | -3.46942200 | 5.71278100  | -0.18047500 |
| H | -1.59759400 | 5.15038000  | -1.72352500 |
| C | 1.92195500  | -0.64639700 | -3.51005100 |
| C | 1.60874800  | 0.06010500  | -2.34950400 |
| C | 0.28780800  | 0.09451400  | -1.87857200 |
| C | -0.70503700 | -0.59281100 | -2.59554400 |
| C | -0.39390400 | -1.28939100 | -3.75690000 |
| C | 0.92440600  | -1.31877400 | -4.21593600 |
| H | 2.95364100  | -0.69553500 | -3.84007800 |
| H | 2.40208800  | 0.54779100  | -1.79916200 |
| H | -1.70964000 | -0.61311300 | -2.19110800 |
| H | -1.17022300 | -1.83819000 | -4.28111600 |
| H | 1.17739400  | -1.88353000 | -5.10843500 |
| C | -0.11561600 | 0.68432100  | -0.56625000 |
| C | 0.72835600  | 1.56570300  | 0.17518300  |
| O | -1.20464200 | 0.32032500  | -0.05812000 |
| S | 0.09582500  | 1.74971300  | 1.75734400  |
| O | 0.01783400  | 0.54451700  | 2.65550900  |
| C | 1.17149300  | 2.95059200  | 2.56611200  |
| H | 1.21742000  | 3.86985900  | 1.98125000  |
| H | 0.73472900  | 3.12291200  | 3.55114600  |
| H | 2.16215300  | 2.50798900  | 2.66547600  |
| C | -1.51137500 | 2.58592000  | 1.82912000  |
| H | -1.63696500 | 2.96060200  | 2.84787900  |
| H | -1.50132300 | 3.39453600  | 1.09631300  |
| H | -2.27707000 | 1.84677300  | 1.59196200  |
| C | 1.83096300  | 2.43420900  | -0.30152500 |
| C | 1.57216600  | 3.42910400  | -1.25944400 |
| C | 3.15006700  | 2.27836900  | 0.14950200  |
| C | 2.60243700  | 4.22478000  | -1.75862900 |
| H | 0.55420500  | 3.56471700  | -1.60771200 |
| C | 4.17905500  | 3.08501300  | -0.32943700 |
| H | 3.36555100  | 1.49575400  | 0.86115700  |
| C | 3.90848900  | 4.05921900  | -1.29193700 |
| H | 2.38470000  | 4.98061500  | -2.50824600 |
| H | 5.18835900  | 2.93409900  | 0.04220800  |
| H | 4.70910200  | 4.68304900  | -1.67888400 |

**A-2**

|   |             |             |             |
|---|-------------|-------------|-------------|
| C | -0.18641300 | -2.90005600 | -2.57547000 |
|---|-------------|-------------|-------------|

|   |             |             |             |
|---|-------------|-------------|-------------|
| C | -1.67988900 | -2.64162600 | -2.32622700 |
| C | -1.28599000 | -1.27801800 | -1.84700300 |
| C | 0.07995500  | -1.53883100 | -2.06209400 |
| O | 0.50394300  | -3.82203300 | -2.98291600 |
| O | -2.70780200 | -3.28057700 | -2.43181900 |
| N | -1.88765900 | -0.16023300 | -1.39160200 |
| H | -1.26706500 | 0.62221400  | -1.15484200 |
| N | 1.20725000  | -0.82530900 | -1.88330700 |
| H | 1.15204800  | -0.07493300 | -1.20005100 |
| C | -3.17998000 | -0.01244900 | -0.88102700 |
| C | -4.14823700 | -1.02797700 | -0.89906200 |
| C | -3.48854300 | 1.22461900  | -0.29776000 |
| C | -5.38718800 | -0.79403500 | -0.30574500 |
| H | -3.94101600 | -1.98014900 | -1.37849400 |
| C | -4.72507700 | 1.42203900  | 0.30753700  |
| H | -2.74935300 | 2.01724500  | -0.31568800 |
| C | -5.69081700 | 0.41899800  | 0.31553200  |
| H | -6.65363300 | 0.57708100  | 0.78296400  |
| C | -4.96108200 | 2.74189500  | 0.98223800  |
| C | -6.39270000 | -1.91381400 | -0.26253200 |
| F | -6.32624000 | -2.69796300 | -1.35514300 |
| F | -7.65921400 | -1.44711600 | -0.16949000 |
| F | -6.19109300 | -2.71295300 | 0.81321200  |
| F | -6.18378300 | 2.83154500  | 1.54063300  |
| F | -4.82462000 | 3.77922400  | 0.12725600  |
| F | -4.05135800 | 2.94827200  | 1.97629400  |
| C | 2.51868900  | -1.48082300 | -1.96381100 |
| H | 2.35895500  | -2.41423000 | -2.50083400 |
| C | 3.54151800  | -0.64614600 | -2.78646800 |
| C | 4.91947000  | -1.31885500 | -2.67164100 |
| H | 4.88015200  | -2.36782100 | -2.99067500 |
| H | 5.64604800  | -0.80578700 | -3.31094400 |
| H | 5.29783700  | -1.28505700 | -1.64382500 |
| C | 3.62728700  | 0.80971500  | -2.30408200 |
| H | 3.95344100  | 0.87235200  | -1.26465000 |
| H | 4.33904700  | 1.36370400  | -2.92682900 |
| H | 2.66036000  | 1.31391900  | -2.39127000 |
| C | 3.07550600  | -0.66583500 | -4.25196500 |
| H | 3.04080100  | -1.68838600 | -4.64623600 |
| H | 2.07545500  | -0.23153400 | -4.34735900 |
| H | 3.76052600  | -0.08283700 | -4.87766400 |
| C | 2.96587600  | -1.76842400 | -0.52409600 |
| O | 3.10595000  | -0.84124000 | 0.28737200  |
| N | 3.13514400  | -3.05602500 | -0.15263400 |

|   |             |             |             |
|---|-------------|-------------|-------------|
| C | 3.46398700  | -3.36843500 | 1.24786800  |
| C | 3.08905600  | -4.26277200 | -1.00764300 |
| C | 3.96056000  | -4.82771000 | 1.15869900  |
| H | 4.25578800  | -2.69224700 | 1.58317800  |
| C | 3.12709300  | -5.40756900 | 0.00974200  |
| H | 2.19441000  | -4.27956000 | -1.63239000 |
| H | 5.02550600  | -4.83667900 | 0.89783300  |
| H | 3.54902500  | -6.32170200 | -0.41543700 |
| H | 2.11244000  | -5.63118700 | 0.35616000  |
| H | 3.97140200  | -4.28699100 | -1.66015800 |
| H | 3.83364200  | -5.36081900 | 2.10374500  |
| C | 2.27046700  | -3.21341400 | 2.18045800  |
| C | 2.49703100  | -3.16654400 | 3.56237800  |
| C | 0.95742000  | -3.14512300 | 1.71153600  |
| C | 1.43323100  | -3.06479000 | 4.45709400  |
| H | 3.51701400  | -3.20923500 | 3.93866300  |
| C | -0.11154000 | -3.03743300 | 2.60307200  |
| H | 0.76385800  | -3.14658100 | 0.64531500  |
| C | 0.12058100  | -3.00152500 | 3.97801200  |
| H | 1.62661100  | -3.03321900 | 5.52587400  |
| H | -1.12316800 | -2.97153300 | 2.21436100  |
| H | -0.71148100 | -2.92543900 | 4.67255000  |
| C | 2.86476900  | 5.05516100  | -2.18531000 |
| C | 2.46512500  | 4.02429300  | -1.33752500 |
| C | 1.10148700  | 3.77282100  | -1.12449700 |
| C | 0.15164700  | 4.56668600  | -1.78421100 |
| C | 0.55316000  | 5.60671500  | -2.61743300 |
| C | 1.91251300  | 5.85407000  | -2.82025000 |
| H | 3.92359700  | 5.23230000  | -2.35110600 |
| H | 3.21452300  | 3.40872900  | -0.85781100 |
| H | -0.89913900 | 4.34564000  | -1.63399400 |
| H | -0.19306400 | 6.22021800  | -3.11423900 |
| H | 2.22801900  | 6.66144500  | -3.47528800 |
| C | 0.58106800  | 2.65644500  | -0.27256100 |
| C | 1.35068000  | 2.11260500  | 0.78425100  |
| O | -0.57422800 | 2.20477400  | -0.53371000 |
| S | 0.51970100  | 0.81673600  | 1.56693500  |
| O | 0.05318700  | -0.32884600 | 0.74715100  |
| C | 1.59134600  | 0.22213600  | 2.87926800  |
| H | 1.92928700  | 1.05104500  | 3.50044900  |
| H | 1.00001700  | -0.50312900 | 3.44045200  |
| H | 2.41959900  | -0.28075500 | 2.38001000  |
| C | -0.90826800 | 1.45572100  | 2.48880400  |
| H | -1.56967600 | 1.92745300  | 1.76455800  |

|   |             |            |            |
|---|-------------|------------|------------|
| H | -1.40031300 | 0.60576100 | 2.96660000 |
| H | -0.54849400 | 2.17808000 | 3.22465900 |
| C | 2.54670100  | 2.70032500 | 1.43720600 |
| C | 2.45065400  | 3.97630500 | 2.01835100 |
| C | 3.78504500  | 2.03737300 | 1.46998700 |
| C | 3.56216900  | 4.58248100 | 2.60032700 |
| H | 1.49760600  | 4.49647300 | 1.98793100 |
| C | 4.89115800  | 2.63798900 | 2.07034900 |
| H | 3.86721900  | 1.05676300 | 1.01587600 |
| C | 4.78630800  | 3.91186200 | 2.63188600 |
| H | 3.47150000  | 5.57471100 | 3.03328800 |
| H | 5.84272400  | 2.11351700 | 2.08684500 |
| H | 5.65293200  | 4.38034700 | 3.08974600 |

**S-B**

|   |             |            |             |
|---|-------------|------------|-------------|
| C | -3.05452400 | 2.74646100 | -0.39346700 |
| C | -1.67426600 | 3.35302200 | -0.12567400 |
| C | -1.12849300 | 2.35407300 | -1.08578000 |
| C | -2.39141200 | 1.75465700 | -1.27724500 |
| O | -4.19950900 | 2.95718100 | -0.02414100 |
| O | -1.23177200 | 4.22539300 | 0.60156500  |
| N | 0.06253500  | 2.01666200 | -1.63118700 |
| H | -0.00092200 | 1.27432600 | -2.34746300 |
| N | -2.80904500 | 0.68356000 | -1.95717600 |
| H | -2.08190700 | 0.10198200 | -2.38749900 |
| C | 1.33789900  | 2.33851500 | -1.17727500 |
| C | 1.57364200  | 3.31553000 | -0.19944300 |
| C | 2.42425000  | 1.60937800 | -1.70194000 |
| C | 2.87625700  | 3.53344800 | 0.25161700  |
| H | 0.74852000  | 3.89053300 | 0.21314200  |
| C | 3.70862000  | 1.84734600 | -1.22913900 |
| H | 2.25934700  | 0.82482800 | -2.43152800 |
| C | 3.95495900  | 2.80865300 | -0.24523700 |
| H | 4.95841500  | 2.98346000 | 0.12166400  |
| C | 4.87115500  | 1.04605700 | -1.74283200 |
| C | 3.08555500  | 4.54452400 | 1.34609200  |
| F | 4.38894900  | 4.85275300 | 1.51497400  |
| F | 2.63636800  | 4.07506400 | 2.54358100  |
| F | 2.41968400  | 5.68927700 | 1.10965000  |
| F | 5.49928300  | 0.39940300 | -0.71597900 |
| F | 5.80614400  | 1.82550400 | -2.32521900 |
| F | 4.50943700  | 0.10170200 | -2.62966100 |
| C | -4.15576600 | 0.13966200 | -1.78684900 |
| H | -4.80607800 | 0.99451700 | -1.60549500 |



|   |             |             |             |
|---|-------------|-------------|-------------|
| C | -4.66656000 | -0.55633800 | -3.08018900 |
| C | -6.10212800 | -1.04576400 | -2.82171100 |
| H | -6.76519100 | -0.21519700 | -2.55201300 |
| H | -6.50807500 | -1.51568900 | -3.72383500 |
| H | -6.13751800 | -1.78920200 | -2.01672900 |
| C | -3.79052700 | -1.74932300 | -3.50293000 |
| H | -3.80948000 | -2.54091800 | -2.74998200 |
| H | -4.17538900 | -2.16268300 | -4.44232100 |
| H | -2.75011100 | -1.45525100 | -3.68002200 |
| C | -4.67591600 | 0.48996200  | -4.20792200 |
| H | -5.29124000 | 1.35728200  | -3.93975400 |
| H | -3.66462200 | 0.84432300  | -4.42612100 |
| H | -5.08906800 | 0.05202100  | -5.12333300 |
| C | -4.16690400 | -0.77653900 | -0.54400100 |
| O | -3.38525700 | -1.73662800 | -0.45251500 |
| N | -5.00266500 | -0.46044800 | 0.47167700  |
| C | -4.91034300 | -1.18705900 | 1.75127900  |
| C | -6.08839200 | 0.54621800  | 0.47726600  |
| C | -6.22270300 | -0.79516700 | 2.46196300  |
| H | -4.87124700 | -2.26130900 | 1.54622100  |
| C | -6.47526300 | 0.62900500  | 1.95560200  |
| H | -5.73514400 | 1.50312800  | 0.09543700  |
| H | -7.02990500 | -1.46300900 | 2.13822700  |
| H | -7.50668000 | 0.96333000  | 2.09398100  |
| H | -5.81416100 | 1.33713700  | 2.46628800  |
| H | -6.92613400 | 0.18506100  | -0.13204700 |
| H | -6.13416300 | -0.86474200 | 3.54858400  |
| C | -3.67033500 | -0.80317700 | 2.55345900  |
| C | -3.33728700 | -1.55641500 | 3.68705500  |
| C | -2.84970400 | 0.26831000  | 2.19642400  |
| C | -2.20287500 | -1.24936500 | 4.43827000  |
| H | -3.96583300 | -2.39577900 | 3.97774700  |
| C | -1.70525200 | 0.57197600  | 2.93569800  |
| H | -3.10164300 | 0.86668900  | 1.33260500  |
| C | -1.37604900 | -0.18675200 | 4.05917400  |
| H | -1.95762900 | -1.84531700 | 5.31324400  |
| H | -1.07342600 | 1.39849500  | 2.62497900  |
| H | -0.47961200 | 0.04067200  | 4.62703000  |
| C | 5.27983200  | -5.21803900 | -0.72801900 |
| C | 3.96727400  | -4.99501900 | -0.33412900 |
| C | 3.46494600  | -3.68350100 | -0.27002400 |
| C | 4.29717600  | -2.60273400 | -0.60182100 |
| C | 5.61212700  | -2.83049500 | -0.99424900 |
| C | 6.10257700  | -4.13543900 | -1.05920500 |

|   |             |             |             |
|---|-------------|-------------|-------------|
| H | 5.66599500  | -6.23149700 | -0.78084400 |
| H | 3.30881100  | -5.81693500 | -0.07508300 |
| H | 3.93682900  | -1.58454300 | -0.55439400 |
| H | 6.24137900  | -1.98592100 | -1.25037600 |
| H | 7.12830800  | -4.31225600 | -1.37006100 |
| C | 2.06332000  | -3.49804500 | 0.14514500  |
| C | 1.55103100  | -2.06384800 | 0.24352000  |
| O | 1.32139000  | -4.43311100 | 0.43900200  |
| S | -0.28434000 | -1.96826200 | 0.00904800  |
| O | -0.62055600 | -0.55102300 | -0.21158200 |
| C | -1.06995700 | -2.65924600 | 1.45716400  |
| H | -2.13680900 | -2.62584900 | 1.23333600  |
| H | -0.82932900 | -2.01288300 | 2.30050800  |
| H | -0.68059200 | -3.66942500 | 1.58604600  |
| C | -0.76344500 | -3.07046900 | -1.32939000 |
| H | -1.77927900 | -2.75919600 | -1.57748400 |
| H | -0.71458500 | -4.08875000 | -0.94516800 |
| H | -0.04684200 | -2.91187800 | -2.13845700 |
| C | 1.88862200  | -1.37307300 | 1.54143200  |
| C | 2.03157100  | -2.10299500 | 2.72990900  |
| C | 2.00600800  | 0.02220100  | 1.56611300  |
| C | 2.30146400  | -1.44048700 | 3.92541000  |
| H | 1.93499900  | -3.18417300 | 2.71972400  |
| C | 2.27015800  | 0.68265100  | 2.76444700  |
| H | 1.88324400  | 0.58670200  | 0.65132400  |
| C | 2.42071200  | -0.04889100 | 3.94384300  |
| H | 2.42010800  | -2.01148800 | 4.84143200  |
| H | 2.36249200  | 1.76275300  | 2.77050200  |
| H | 2.63462100  | 0.46517900  | 4.87647900  |
| H | 1.85548000  | -1.48840300 | -0.64001600 |
| N | -0.41112600 | -0.19839600 | -3.42678300 |
| N | 0.53950400  | -0.84731600 | -3.13190800 |
| N | 1.48434700  | -1.48413700 | -2.81852000 |

**S-B-1**

|   |             |             |             |
|---|-------------|-------------|-------------|
| C | -1.99221700 | -2.86543600 | 0.45347800  |
| C | -0.53074600 | -3.16258600 | 0.08446700  |
| C | -0.15624100 | -2.02632500 | 0.96850200  |
| C | -1.49615800 | -1.75213800 | 1.29953600  |
| O | -3.09280300 | -3.30122700 | 0.15165000  |
| O | 0.05205000  | -3.95778000 | -0.63082400 |
| N | 0.95647300  | -1.35408200 | 1.35311800  |
| H | 0.77366700  | -0.45282600 | 1.82472400  |
| N | -2.06692600 | -0.83906200 | 2.08508500  |

|   |             |             |             |
|---|-------------|-------------|-------------|
| H | -1.48145100 | -0.04787100 | 2.37651800  |
| C | 2.28932000  | -1.64160300 | 1.08047000  |
| C | 2.70665400  | -2.79888500 | 0.40507500  |
| C | 3.24271400  | -0.69667500 | 1.49146300  |
| C | 4.06070200  | -2.97141700 | 0.12891200  |
| H | 1.97890300  | -3.52989800 | 0.06522400  |
| C | 4.58654900  | -0.88970600 | 1.18976900  |
| H | 2.91791900  | 0.18534500  | 2.03468400  |
| C | 5.01468000  | -2.02535100 | 0.50393100  |
| H | 6.06237900  | -2.17464700 | 0.27926300  |
| C | 5.56883800  | 0.19044200  | 1.54118900  |
| C | 4.48620500  | -4.17694500 | -0.66500800 |
| F | 5.78464000  | -4.48572600 | -0.45862300 |
| F | 4.34819100  | -3.96101700 | -2.00269500 |
| F | 3.75228700  | -5.26470000 | -0.37032600 |
| F | 5.53576200  | 1.19642900  | 0.62995700  |
| F | 6.83773900  | -0.25949700 | 1.58664400  |
| F | 5.29183700  | 0.75473700  | 2.74230000  |
| C | -3.50480100 | -0.79343100 | 2.32953100  |
| H | -3.85820400 | -1.82544000 | 2.32633400  |
| C | -3.80288400 | -0.19557600 | 3.74135500  |
| C | -5.32673500 | -0.10641600 | 3.93179600  |
| H | -5.80302300 | -1.08849800 | 3.83011000  |
| H | -5.55326800 | 0.26744900  | 4.93587700  |
| H | -5.78767700 | 0.57780500  | 3.21143000  |
| C | -3.18720800 | 1.20540800  | 3.91754400  |
| H | -3.50377100 | 1.88749400  | 3.12578600  |
| H | -3.50148300 | 1.61674700  | 4.88354600  |
| H | -2.09269200 | 1.17762300  | 3.92035300  |
| C | -3.21818700 | -1.15102300 | 4.79569700  |
| H | -3.67087900 | -2.14769000 | 4.72439100  |
| H | -2.13621400 | -1.25986000 | 4.67585600  |
| H | -3.41010200 | -0.76407900 | 5.80263300  |
| C | -4.19111500 | -0.00725700 | 1.20354300  |
| O | -3.76915900 | 1.10346200  | 0.86718900  |
| N | -5.26844800 | -0.56060000 | 0.59680800  |
| C | -5.94018000 | 0.18250000  | -0.47890000 |
| C | -5.89097900 | -1.87431600 | 0.85922500  |
| C | -7.27716100 | -0.57711200 | -0.61969700 |
| H | -6.09041200 | 1.21590000  | -0.15431400 |
| C | -6.88835400 | -2.02524400 | -0.29636800 |
| H | -5.13456900 | -2.66030000 | 0.85996400  |
| H | -7.99027200 | -0.19902200 | 0.12244800  |
| H | -7.74210000 | -2.65154900 | -0.02445500 |

|   |             |             |             |
|---|-------------|-------------|-------------|
| H | -6.39174700 | -2.48400000 | -1.15741700 |
| H | -6.41049600 | -1.85934500 | 1.82448500  |
| H | -7.71653100 | -0.45395500 | -1.61252300 |
| C | -5.14905200 | 0.19561200  | -1.77774800 |
| C | -4.19106400 | -0.77766700 | -2.07517100 |
| C | -5.43075100 | 1.18459800  | -2.72984100 |
| C | -3.54368400 | -0.77543000 | -3.31252600 |
| H | -3.93321000 | -1.53288700 | -1.34042600 |
| C | -4.78516300 | 1.19066100  | -3.96581800 |
| H | -6.16318600 | 1.95488900  | -2.49887400 |
| C | -3.84270500 | 0.20089900  | -4.26438000 |
| H | -2.79801200 | -1.53612400 | -3.52075900 |
| H | -5.01998000 | 1.96076700  | -4.69561700 |
| H | -3.35603800 | 0.18634600  | -5.23668100 |
| C | 2.67048500  | 5.78456300  | 1.28227400  |
| C | 1.81859000  | 5.21116600  | 0.34871400  |
| C | 1.87234900  | 3.82970000  | 0.10366200  |
| C | 2.80540900  | 3.03662200  | 0.78675400  |
| C | 3.66481500  | 3.61779900  | 1.71653500  |
| C | 3.59216800  | 4.98733300  | 1.96983000  |
| H | 2.61706600  | 6.85073200  | 1.48167300  |
| H | 1.08812000  | 5.80470800  | -0.18915900 |
| H | 2.89219800  | 1.97839300  | 0.57454100  |
| H | 4.38900400  | 3.00129500  | 2.23539700  |
| H | 4.25774000  | 5.43714800  | 2.70107000  |
| C | 0.94334000  | 3.27474100  | -0.89884700 |
| C | 0.86598000  | 1.74928000  | -1.03460500 |
| O | 0.33218300  | 3.97058000  | -1.70808300 |
| S | -0.73954500 | 1.24056600  | -1.84776600 |
| O | -0.95008000 | -0.20427200 | -1.61569700 |
| C | -0.52662600 | 1.62578600  | -3.59035800 |
| H | -1.46615200 | 1.35600000  | -4.07610700 |
| H | 0.30107700  | 1.02050100  | -3.96015100 |
| H | -0.30852800 | 2.69266700  | -3.65851100 |
| C | -2.14192900 | 2.23389800  | -1.34626900 |
| H | -2.94528600 | 1.94857400  | -2.03005200 |
| H | -1.85618700 | 3.28046400  | -1.43121800 |
| H | -2.39427600 | 1.96232100  | -0.31976000 |
| C | 1.99017100  | 1.15539200  | -1.85724400 |
| C | 2.82141000  | 1.97190000  | -2.63758100 |
| C | 2.19924100  | -0.23067300 | -1.84515600 |
| C | 3.86682200  | 1.40838700  | -3.36623400 |
| H | 2.66413800  | 3.04447500  | -2.66662200 |
| C | 3.23965000  | -0.79129400 | -2.58276900 |

|   |             |             |             |
|---|-------------|-------------|-------------|
| H | 1.53958000  | -0.86779200 | -1.27254500 |
| C | 4.07950600  | 0.02914700  | -3.33699700 |
| H | 4.51692900  | 2.04990200  | -3.95339800 |
| H | 3.40083600  | -1.86220000 | -2.55205500 |
| H | 4.89904400  | -0.40654500 | -3.90082900 |
| H | 0.78012500  | 1.24079100  | -0.06878700 |
| N | 0.10398100  | 1.16070300  | 2.36918400  |
| N | -0.33313500 | 2.10765600  | 1.78563300  |
| N | -0.74792600 | 3.03239000  | 1.19568800  |

**S-B-2**

|   |             |             |             |
|---|-------------|-------------|-------------|
| C | -0.90137500 | -3.95409000 | 1.28841300  |
| C | 0.61837000  | -3.94001600 | 1.04134200  |
| C | 0.65827900  | -2.67747900 | 1.82555600  |
| C | -0.73444400 | -2.66066800 | 2.00320800  |
| O | -1.84515900 | -4.66243800 | 0.98386700  |
| O | 1.40970300  | -4.59770600 | 0.38934900  |
| N | 1.59732500  | -1.78554500 | 2.23079400  |
| H | 1.23659000  | -1.04409800 | 2.86079400  |
| N | -1.59200300 | -1.76733000 | 2.51729200  |
| H | -1.15628000 | -0.88852000 | 2.82130000  |
| C | 2.76008100  | -1.45682300 | 1.54642600  |
| C | 3.05717500  | -1.96286300 | 0.26840000  |
| C | 3.61395100  | -0.50310800 | 2.12084400  |
| C | 4.17453300  | -1.49665900 | -0.41163400 |
| H | 2.41740800  | -2.70500400 | -0.18588100 |
| C | 4.73292300  | -0.05672600 | 1.42171500  |
| H | 3.38028100  | -0.09722400 | 3.09946400  |
| C | 5.03029500  | -0.54220900 | 0.14834700  |
| H | 5.89921000  | -0.18752600 | -0.39207300 |
| C | 5.53985400  | 1.07746400  | 1.98606400  |
| C | 4.39748100  | -1.92009600 | -1.83581900 |
| F | 3.75674500  | -3.05722500 | -2.15631300 |
| F | 5.70425300  | -2.08117000 | -2.12254800 |
| F | 3.93779400  | -0.95814800 | -2.69968200 |
| F | 6.80935500  | 1.07815200  | 1.53031500  |
| F | 5.58262700  | 1.06001600  | 3.33150700  |
| F | 4.99486600  | 2.27390900  | 1.62559900  |
| C | -2.93615900 | -1.66175400 | 1.93326400  |
| H | -3.32118500 | -2.67846700 | 1.85170900  |
| C | -3.89409500 | -0.85344200 | 2.85544800  |
| C | -5.19654400 | -0.56375800 | 2.08856100  |
| H | -5.67383100 | -1.48697100 | 1.73958200  |
| H | -5.90922300 | -0.05443200 | 2.74650100  |

|   |             |             |             |
|---|-------------|-------------|-------------|
| H | -5.02083600 | 0.08650100  | 1.22473700  |
| C | -3.27203300 | 0.47979800  | 3.30771100  |
| H | -2.94048400 | 1.06852500  | 2.45184300  |
| H | -4.02023100 | 1.05961700  | 3.86078100  |
| H | -2.41589900 | 0.32909100  | 3.97205100  |
| C | -4.20087200 | -1.71826000 | 4.08906100  |
| H | -4.72199500 | -2.64167700 | 3.80823500  |
| H | -3.27824600 | -1.99274800 | 4.60979500  |
| H | -4.83905700 | -1.16935400 | 4.79092400  |
| C | -2.77492800 | -1.04776900 | 0.52440600  |
| O | -2.16401100 | 0.01823300  | 0.38971200  |
| N | -3.26193700 | -1.74612100 | -0.53074300 |
| C | -3.06545900 | -1.26696400 | -1.91135000 |
| C | -4.12476500 | -2.94872800 | -0.47752100 |
| C | -4.24223900 | -1.93073500 | -2.65358700 |
| H | -3.13924900 | -0.18000300 | -1.92246300 |
| C | -4.35253800 | -3.29098500 | -1.95524700 |
| H | -3.63557900 | -3.75750600 | 0.06746800  |
| H | -5.15425800 | -1.34245600 | -2.49334400 |
| H | -5.31241000 | -3.78859200 | -2.11711100 |
| H | -3.55959300 | -3.95767500 | -2.30926200 |
| H | -5.07255200 | -2.70280300 | 0.01498100  |
| H | -4.06232700 | -2.00578300 | -3.72860400 |
| C | -1.71917700 | -1.66772900 | -2.50321400 |
| C | -0.88081500 | -2.60079900 | -1.89364400 |
| C | -1.32470800 | -1.11331000 | -3.72870600 |
| C | 0.34579700  | -2.94927800 | -2.46369600 |
| H | -1.19141700 | -3.06561100 | -0.96896500 |
| C | -0.10748600 | -1.46795700 | -4.31107000 |
| H | -1.96731700 | -0.38552500 | -4.21689700 |
| C | 0.74246200  | -2.37505900 | -3.67017600 |
| H | 0.97736700  | -3.67501900 | -1.96107100 |
| H | 0.18298400  | -1.02727900 | -5.26187300 |
| H | 1.70317900  | -2.63314100 | -4.10556100 |
| C | -5.41052300 | 2.78877100  | -0.87824900 |
| C | -4.17712700 | 2.43624700  | -1.41282900 |
| C | -3.00935700 | 2.56782200  | -0.64563900 |
| C | -3.09013700 | 3.07833400  | 0.65794000  |
| C | -4.32734500 | 3.43686200  | 1.18726900  |
| C | -5.48724200 | 3.28835500  | 0.42559800  |
| H | -6.31197300 | 2.67736300  | -1.47347900 |
| H | -4.09348000 | 2.05095100  | -2.42316200 |
| H | -2.20595700 | 3.17218100  | 1.27875800  |
| H | -4.38529300 | 3.81745900  | 2.20210300  |

|   |             |             |             |
|---|-------------|-------------|-------------|
| H | -6.45088600 | 3.56074300  | 0.84635300  |
| C | -1.73423700 | 2.13187100  | -1.25956400 |
| C | -0.45274300 | 2.44744500  | -0.49095500 |
| O | -1.66854900 | 1.66286200  | -2.38949700 |
| S | 0.86898300  | 1.18294200  | -0.80825000 |
| O | 0.57832600  | -0.15319200 | -0.26986800 |
| C | 2.33152300  | 1.90773000  | -0.05615700 |
| H | 2.56644900  | 2.85110200  | -0.54836500 |
| H | 3.12760400  | 1.17526700  | -0.19082100 |
| H | 2.08926500  | 2.06388700  | 0.99970500  |
| C | 1.27582500  | 1.12682600  | -2.55550700 |
| H | 2.15389700  | 0.48229300  | -2.63079400 |
| H | 1.47764400  | 2.14020300  | -2.90462500 |
| H | 0.41976900  | 0.68471400  | -3.06188800 |
| C | 0.03687200  | 3.84319300  | -0.81009100 |
| C | 0.01296900  | 4.33460000  | -2.12392000 |
| C | 0.51017500  | 4.65811800  | 0.22887100  |
| C | 0.47711300  | 5.61989900  | -2.39806500 |
| H | -0.38813800 | 3.71960000  | -2.92313800 |
| C | 0.96800200  | 5.94415900  | -0.05364200 |
| H | 0.52258200  | 4.27159000  | 1.24265900  |
| C | 0.95820300  | 6.42531900  | -1.36429200 |
| H | 0.45420200  | 5.99435800  | -3.41712000 |
| H | 1.33342500  | 6.57098200  | 0.75424600  |
| H | 1.31749600  | 7.42748600  | -1.57897000 |
| H | -0.54464200 | 2.30576300  | 0.59462100  |
| N | 0.23489000  | 0.27925700  | 3.61601000  |
| N | 0.27965400  | 1.30078100  | 3.01697400  |
| N | 0.32818500  | 2.32688500  | 2.43499200  |

### S-TS1

|   |             |             |             |
|---|-------------|-------------|-------------|
| C | -3.16697700 | 2.92779400  | -0.64652600 |
| C | -1.80975100 | 3.60710000  | -0.41322900 |
| C | -1.19612800 | 2.46213300  | -1.15161600 |
| C | -2.43620200 | 1.81305800  | -1.30241600 |
| O | -4.33720100 | 3.18256600  | -0.41856400 |
| O | -1.41891900 | 4.60540400  | 0.15789500  |
| N | 0.02723200  | 2.10657900  | -1.60949800 |
| H | 0.03643200  | 1.31677700  | -2.25940000 |
| N | -2.81667500 | 0.64234000  | -1.83576000 |
| H | -2.09387400 | -0.06576400 | -1.93496100 |
| C | 1.28198000  | 2.54959500  | -1.18126300 |
| C | 1.44789600  | 3.54431900  | -0.20757900 |
| C | 2.41306500  | 1.90690900  | -1.70976200 |

|   |             |             |             |
|---|-------------|-------------|-------------|
| C | 2.73243600  | 3.84423400  | 0.24433200  |
| H | 0.59034400  | 4.08318300  | 0.18423500  |
| C | 3.67945400  | 2.20794600  | -1.22311500 |
| H | 2.30799400  | 1.13846900  | -2.46370100 |
| C | 3.85768000  | 3.17871300  | -0.23866000 |
| H | 4.84463900  | 3.41006500  | 0.14046800  |
| C | 4.85265500  | 1.38638000  | -1.68181900 |
| C | 2.88324700  | 4.82404600  | 1.37570700  |
| F | 4.11663000  | 5.37178500  | 1.41192400  |
| F | 2.69467500  | 4.20561100  | 2.57365500  |
| F | 1.98855300  | 5.82555100  | 1.30813900  |
| F | 5.02519400  | 0.29949200  | -0.87944000 |
| F | 6.00703200  | 2.08441800  | -1.63462900 |
| F | 4.69844700  | 0.92690300  | -2.93704000 |
| C | -4.19722600 | 0.15786700  | -1.71289700 |
| H | -4.80080300 | 1.03821500  | -1.49987500 |
| C | -4.72842000 | -0.44673700 | -3.04221200 |
| C | -6.15524700 | -0.96272900 | -2.78915500 |
| H | -6.80876100 | -0.16289000 | -2.41992600 |
| H | -6.59098200 | -1.34461900 | -3.71859300 |
| H | -6.16344600 | -1.77922300 | -2.05810600 |
| C | -3.84935300 | -1.59407800 | -3.56717700 |
| H | -3.85780300 | -2.44485900 | -2.88287700 |
| H | -4.23024300 | -1.92994000 | -4.53828700 |
| H | -2.81245600 | -1.27367700 | -3.71895200 |
| C | -4.76417700 | 0.68287300  | -4.08544500 |
| H | -5.39810600 | 1.51311400  | -3.75171900 |
| H | -3.76027200 | 1.07571700  | -4.27238500 |
| H | -5.16619900 | 0.31013200  | -5.03393300 |
| C | -4.24142600 | -0.80874800 | -0.51547300 |
| O | -3.56567400 | -1.84971800 | -0.51886900 |
| N | -4.96264700 | -0.43897600 | 0.56647300  |
| C | -4.85598500 | -1.20682300 | 1.81931300  |
| C | -5.95212100 | 0.65875100  | 0.66598000  |
| C | -6.09932400 | -0.74626100 | 2.60718500  |
| H | -4.90226900 | -2.27434200 | 1.58417500  |
| C | -6.26349900 | 0.71153600  | 2.16419700  |
| H | -5.54821400 | 1.60004000  | 0.29320900  |
| H | -6.96953500 | -1.33834500 | 2.29995700  |
| H | -7.25811600 | 1.11850700  | 2.36301900  |
| H | -5.52814200 | 1.34481900  | 2.67190900  |
| H | -6.84644300 | 0.39672900  | 0.08612600  |
| H | -5.96693700 | -0.86319500 | 3.68510000  |
| C | -3.55083400 | -0.92792200 | 2.55928800  |



|   |             |             |             |
|---|-------------|-------------|-------------|
| C | -3.24006200 | -1.69744200 | 3.68851400  |
| C | -2.64567000 | 0.05236000  | 2.14734500  |
| C | -2.04784000 | -1.49632400 | 4.38311400  |
| H | -3.93239900 | -2.46911700 | 4.01875600  |
| C | -1.44578600 | 0.25003500  | 2.83280900  |
| H | -2.86091300 | 0.65113700  | 1.27159600  |
| C | -1.14050400 | -0.52316100 | 3.95217400  |
| H | -1.82158800 | -2.10556500 | 5.25394100  |
| H | -0.74131000 | 0.99434000  | 2.47719900  |
| H | -0.19845500 | -0.37861000 | 4.47078300  |
| C | 5.28796700  | -5.40719000 | 0.08123500  |
| C | 3.91281600  | -5.20486800 | 0.13613000  |
| C | 3.37900700  | -3.92538200 | -0.07689900 |
| C | 4.24099000  | -2.85428300 | -0.36011000 |
| C | 5.61567600  | -3.06183100 | -0.42276900 |
| C | 6.14145800  | -4.33544200 | -0.19767800 |
| H | 5.69729300  | -6.39864600 | 0.25248700  |
| H | 3.23076600  | -6.02340200 | 0.34016700  |
| H | 3.85235800  | -1.86165600 | -0.54513300 |
| H | 6.26703800  | -2.22405800 | -0.65122400 |
| H | 7.21512800  | -4.49547900 | -0.24312500 |
| C | 1.89901700  | -3.76262800 | -0.02117000 |
| C | 1.39461800  | -2.36989800 | 0.03062500  |
| O | 1.14619700  | -4.74539200 | -0.06148500 |
| S | -0.37596200 | -2.24965300 | -0.14101600 |
| O | -0.74692300 | -0.82562000 | -0.32882600 |
| C | -1.20556900 | -3.00008200 | 1.25898800  |
| H | -2.27473400 | -2.90861200 | 1.06689900  |
| H | -0.91295700 | -2.43258200 | 2.14280100  |
| H | -0.85412700 | -4.03276900 | 1.30352100  |
| C | -0.92122800 | -3.23836300 | -1.54123200 |
| H | -1.98653200 | -3.01598000 | -1.62377900 |
| H | -0.70491200 | -4.28302400 | -1.32757200 |
| H | -0.37656400 | -2.89413100 | -2.41963000 |
| C | 1.82778300  | -1.51271100 | 1.18891700  |
| C | 2.16263600  | -2.10378300 | 2.41903100  |
| C | 1.86358300  | -0.11603900 | 1.08157900  |
| C | 2.54683900  | -1.31828600 | 3.50318800  |
| H | 2.13127100  | -3.18472000 | 2.52119300  |
| C | 2.23012000  | 0.67296800  | 2.17119500  |
| H | 1.59605500  | 0.34720000  | 0.14413200  |
| C | 2.57781800  | 0.07275700  | 3.38245200  |
| H | 2.81592700  | -1.79229200 | 4.44286700  |
| H | 2.25382100  | 1.75256500  | 2.07554900  |

|   |            |             |             |
|---|------------|-------------|-------------|
| H | 2.87525100 | 0.68762300  | 4.22710400  |
| H | 1.74424100 | -1.79731600 | -1.28596000 |
| N | 0.04777700 | -0.32933800 | -3.37621500 |
| N | 0.98089900 | -0.85073900 | -2.91302900 |
| N | 1.95724900 | -1.37462100 | -2.44155200 |

**S-TS1-1**

|   |             |             |             |
|---|-------------|-------------|-------------|
| C | 0.69166800  | -3.34876700 | -1.89307800 |
| C | -0.75297900 | -3.37822000 | -1.40373400 |
| C | -0.71512900 | -1.87596700 | -1.41488700 |
| C | 0.64449600  | -1.87716100 | -1.80678200 |
| O | 1.54964200  | -4.17787300 | -2.16501700 |
| O | -1.53543500 | -4.24694700 | -1.06850900 |
| N | -1.54574700 | -0.85624700 | -1.12051600 |
| H | -1.11664900 | 0.06734200  | -1.09575300 |
| N | 1.58663500  | -0.93658200 | -2.02427100 |
| H | 1.37895200  | -0.00830600 | -1.66071900 |
| C | -2.91485200 | -0.88423100 | -0.79793000 |
| C | -3.61832900 | -2.07591300 | -0.58940500 |
| C | -3.57598600 | 0.34729000  | -0.68485300 |
| C | -4.97336400 | -2.01807300 | -0.27070400 |
| H | -3.11783900 | -3.03590000 | -0.65888800 |
| C | -4.93019000 | 0.37671900  | -0.36204800 |
| H | -3.03810400 | 1.27976900  | -0.82295300 |
| C | -5.64337400 | -0.80211100 | -0.15403700 |
| H | -6.69500800 | -0.77172500 | 0.09714300  |
| C | -5.61219400 | 1.71144300  | -0.20402000 |
| C | -5.73116800 | -3.30723400 | -0.10409600 |
| F | -6.13379500 | -3.80496900 | -1.29595500 |
| F | -6.84258800 | -3.14418100 | 0.64963400  |
| F | -4.97849400 | -4.26012000 | 0.48608900  |
| F | -6.95900000 | 1.57915300  | -0.13665800 |
| F | -5.34049200 | 2.53133700  | -1.23739600 |
| F | -5.21942800 | 2.33594500  | 0.92544300  |
| C | 3.00204300  | -1.33510700 | -1.99837100 |
| H | 3.04834400  | -2.31453500 | -2.47281800 |
| C | 3.90239000  | -0.36993000 | -2.81871700 |
| C | 5.32864400  | -0.94746200 | -2.83293400 |
| H | 5.35076700  | -1.94491000 | -3.28663200 |
| H | 5.99177500  | -0.30024200 | -3.41676900 |
| H | 5.74406600  | -1.02042200 | -1.82105300 |
| C | 3.94487400  | 1.04923700  | -2.22735900 |
| H | 4.39811700  | 1.05894000  | -1.23375500 |
| H | 4.53466700  | 1.70050600  | -2.88211100 |

|   |             |             |             |
|---|-------------|-------------|-------------|
| H | 2.95007500  | 1.49396100  | -2.14473200 |
| C | 3.36260500  | -0.31451100 | -4.25762100 |
| H | 3.31959000  | -1.31515800 | -4.70324800 |
| H | 2.35389900  | 0.10742100  | -4.28830400 |
| H | 4.01460500  | 0.30729200  | -4.88114200 |
| C | 3.40316400  | -1.44237700 | -0.51779700 |
| O | 3.12657400  | -0.51411000 | 0.25823300  |
| N | 3.96534400  | -2.58171300 | -0.06302000 |
| C | 4.11411300  | -2.77031500 | 1.39304900  |
| C | 4.42626400  | -3.75136600 | -0.84069200 |
| C | 5.02231500  | -4.01540000 | 1.47870900  |
| H | 4.59662400  | -1.88742800 | 1.82033900  |
| C | 4.63722700  | -4.82508800 | 0.23357700  |
| H | 3.67898400  | -4.04652800 | -1.57819800 |
| H | 6.07236100  | -3.70494800 | 1.42059600  |
| H | 5.39835300  | -5.55325000 | -0.05834000 |
| H | 3.70165400  | -5.36623500 | 0.40595100  |
| H | 5.36723900  | -3.50915100 | -1.34841800 |
| H | 4.87766200  | -4.56039800 | 2.41440200  |
| C | 2.76883200  | -2.96629400 | 2.07933800  |
| C | 2.62788200  | -2.62527300 | 3.42903500  |
| C | 1.67487800  | -3.52442100 | 1.40865200  |
| C | 1.42047500  | -2.83985100 | 4.09525100  |
| H | 3.47020400  | -2.18850900 | 3.96152800  |
| C | 0.45972400  | -3.72604400 | 2.06455100  |
| H | 1.76872900  | -3.80487700 | 0.36680400  |
| C | 0.32926400  | -3.38498300 | 3.41262100  |
| H | 1.32928100  | -2.57459800 | 5.14531500  |
| H | -0.37778500 | -4.14884100 | 1.51677000  |
| H | -0.61304800 | -3.54761700 | 3.92796400  |
| C | 1.24033400  | 4.22027100  | -3.66933800 |
| C | 0.98071800  | 3.22594800  | -2.73517400 |
| C | 0.80619800  | 3.55299600  | -1.37931700 |
| C | 0.86272600  | 4.89833500  | -0.98000900 |
| C | 1.11482700  | 5.89165600  | -1.92162900 |
| C | 1.31353000  | 5.55565600  | -3.26198700 |
| H | 1.37744400  | 3.95958900  | -4.71441400 |
| H | 0.89653200  | 2.18811400  | -3.03699900 |
| H | 0.66766300  | 5.17379000  | 0.04900700  |
| H | 1.14549500  | 6.93095500  | -1.60971200 |
| H | 1.51182300  | 6.33475300  | -3.99244800 |
| C | 0.52349800  | 2.45721700  | -0.43019600 |
| C | 0.50206600  | 2.76869800  | 1.01711700  |
| O | 0.28516100  | 1.30343100  | -0.83971000 |

|   |             |             |             |
|---|-------------|-------------|-------------|
| S | -0.26664900 | 1.40213200  | 1.91567200  |
| O | -1.58459500 | 0.99363000  | 1.39204500  |
| C | -0.45188600 | 2.07038800  | 3.57500400  |
| H | 0.52276600  | 2.32619200  | 3.99090400  |
| H | -0.95482800 | 1.29910700  | 4.16175100  |
| H | -1.08130000 | 2.95850500  | 3.45508300  |
| C | 0.84776400  | 0.00791800  | 2.09823400  |
| H | 0.30385700  | -0.77612800 | 2.62846600  |
| H | 1.73208700  | 0.32763100  | 2.64837000  |
| H | 1.14358000  | -0.31207300 | 1.10106800  |
| C | 1.79246800  | 3.22530600  | 1.64627600  |
| C | 2.98684700  | 2.54033900  | 1.37568700  |
| C | 1.80578100  | 4.33410700  | 2.50579200  |
| C | 4.17925900  | 2.96117600  | 1.96312400  |
| H | 2.98150500  | 1.67237600  | 0.72310100  |
| C | 3.00223200  | 4.74897900  | 3.08890500  |
| H | 0.88214600  | 4.87326400  | 2.69414800  |
| C | 4.18926700  | 4.06336800  | 2.81990300  |
| H | 5.09912500  | 2.42459200  | 1.74938700  |
| H | 3.00871300  | 5.61165700  | 3.74872200  |
| H | 5.11985700  | 4.39052200  | 3.27486800  |
| H | -0.39119800 | 3.67372400  | 1.27586800  |
| N | -2.90745600 | 4.12536800  | -0.17503500 |
| N | -2.19126900 | 4.34323500  | 0.70715200  |
| N | -1.40558200 | 4.54771700  | 1.61478500  |

#### S-TS1-2

|   |             |             |             |
|---|-------------|-------------|-------------|
| C | 3.78065000  | -1.45716600 | -1.94295900 |
| C | 2.74530800  | -2.59510500 | -1.94314400 |
| C | 1.71757000  | -1.56009400 | -2.21804000 |
| C | 2.64047300  | -0.50680500 | -2.09694000 |
| O | 4.98908000  | -1.35787300 | -1.83949400 |
| O | 2.75705500  | -3.78630200 | -1.69065500 |
| N | 0.38258000  | -1.53881100 | -2.48804500 |
| H | 0.04061800  | -0.64405000 | -2.85171300 |
| N | 2.52986200  | 0.82338300  | -2.04234200 |
| C | -0.57756900 | -2.34445600 | -1.88536300 |
| C | -0.23377700 | -3.36190800 | -0.98200300 |
| C | -1.93548300 | -2.08047700 | -2.13485700 |
| C | -1.23532100 | -4.05415800 | -0.30985600 |
| H | 0.80442300  | -3.62143500 | -0.82124000 |
| C | -2.91908800 | -2.81234000 | -1.47397600 |
| H | -2.22084200 | -1.28673000 | -2.81500600 |
| C | -2.58629700 | -3.79827300 | -0.54235800 |

|   |             |             |             |
|---|-------------|-------------|-------------|
| H | -3.35618700 | -4.33983500 | -0.00705000 |
| C | -4.37050000 | -2.56766700 | -1.78393500 |
| C | -0.84389900 | -4.97660100 | 0.80978100  |
| F | 0.39177800  | -5.48452600 | 0.66016800  |
| F | -1.70525400 | -6.00139300 | 0.95943100  |
| F | -0.84259800 | -4.29556100 | 1.99795600  |
| F | -4.85147500 | -3.45969800 | -2.67383800 |
| F | -4.58460300 | -1.33622900 | -2.29546500 |
| F | -5.13780300 | -2.67536700 | -0.66798200 |
| C | 3.61194600  | 1.65258400  | -1.49303800 |
| H | 4.54450000  | 1.22249600  | -1.85786500 |
| C | 3.51743900  | 3.11407700  | -2.01415300 |
| C | 4.57006600  | 3.95359400  | -1.26987700 |
| H | 5.57429000  | 3.52413300  | -1.37554600 |
| H | 4.59892200  | 4.96875700  | -1.67983500 |
| H | 4.33760100  | 4.03230500  | -0.20237600 |
| C | 2.11930900  | 3.72426500  | -1.79390800 |
| H | 1.80256300  | 3.65966500  | -0.75104200 |
| H | 2.13763800  | 4.77893800  | -2.09192300 |
| H | 1.36208500  | 3.23216000  | -2.41459400 |
| C | 3.83691300  | 3.10128900  | -3.51841900 |
| H | 4.85339900  | 2.73464100  | -3.70778700 |
| H | 3.13550600  | 2.46034100  | -4.06146400 |
| H | 3.76063100  | 4.11368500  | -3.93044800 |
| C | 3.54630800  | 1.55238000  | 0.04524000  |
| O | 2.51713700  | 1.87832700  | 0.64034700  |
| N | 4.60678200  | 1.02757500  | 0.71129200  |
| C | 4.47878200  | 0.76525200  | 2.15695300  |
| C | 5.97064900  | 0.77474500  | 0.20781300  |
| C | 5.93969300  | 0.50708400  | 2.59152900  |
| H | 4.06894500  | 1.65418500  | 2.64593500  |
| C | 6.59445300  | -0.06231600 | 1.32696600  |
| H | 5.94725400  | 0.23852100  | -0.73973100 |
| H | 6.41268500  | 1.45735500  | 2.86621500  |
| H | 7.68555900  | 0.00500500  | 1.33667100  |
| H | 6.31885500  | -1.11372100 | 1.19261700  |
| H | 6.50495500  | 1.72601200  | 0.08107700  |
| H | 5.99512500  | -0.16313300 | 3.45259900  |
| C | 3.55363600  | -0.40788900 | 2.45673900  |
| C | 3.27242300  | -1.39282500 | 1.50709200  |
| C | 2.98877900  | -0.52717700 | 3.73240900  |
| C | 2.42167500  | -2.45827600 | 1.80691100  |
| H | 3.72799900  | -1.32696700 | 0.52848900  |
| C | 2.14232500  | -1.59310200 | 4.04193100  |

|   |             |             |             |
|---|-------------|-------------|-------------|
| H | 3.20181100  | 0.22946800  | 4.48474500  |
| C | 1.84343300  | -2.55758600 | 3.07402200  |
| H | 2.23237400  | -3.22028000 | 1.05711900  |
| H | 1.70965200  | -1.66690500 | 5.03626300  |
| H | 1.17564400  | -3.38258700 | 3.30130700  |
| C | -3.06056600 | 6.52757600  | 0.76974900  |
| C | -2.21189200 | 5.44223000  | 0.95947200  |
| C | -2.56822000 | 4.17267500  | 0.48078800  |
| C | -3.77479200 | 4.00901000  | -0.21501000 |
| C | -4.61469500 | 5.10184300  | -0.41649700 |
| C | -4.26507800 | 6.35805900  | 0.08183300  |
| H | -2.78334700 | 7.50616200  | 1.15094300  |
| H | -1.26299800 | 5.55302100  | 1.47329400  |
| H | -4.04593100 | 3.04378800  | -0.62412900 |
| H | -5.54153800 | 4.97206300  | -0.96717800 |
| H | -4.92687400 | 7.20596100  | -0.07133000 |
| C | -1.60292000 | 3.05981100  | 0.70859900  |
| C | -2.10030200 | 1.66353400  | 0.59028300  |
| O | -0.41410200 | 3.29354800  | 0.93640600  |
| S | -0.74306400 | 0.52755800  | 0.90349300  |
| O | 0.11190800  | 0.29600900  | -0.28140200 |
| C | -1.50379000 | -1.02064300 | 1.41478400  |
| H | -2.06307400 | -0.86881100 | 2.33838400  |
| H | -0.67826900 | -1.71951400 | 1.55760800  |
| H | -2.16133400 | -1.36374300 | 0.61846800  |
| C | 0.21916800  | 0.95380100  | 2.37101100  |
| H | 0.59414500  | 0.01573000  | 2.78203500  |
| H | -0.44112200 | 1.46828900  | 3.07113300  |
| H | 1.03538700  | 1.58629500  | 2.02452000  |
| C | -3.38240600 | 1.25669100  | 1.25195200  |
| C | -3.70063100 | 1.69516300  | 2.54623000  |
| C | -4.27095000 | 0.40027500  | 0.58546700  |
| C | -4.87746500 | 1.27692700  | 3.16471800  |
| H | -3.02843000 | 2.37758400  | 3.06026800  |
| C | -5.44150100 | -0.02815800 | 1.20889400  |
| H | -4.04729000 | 0.08533100  | -0.42761900 |
| C | -5.74562600 | 0.40769300  | 2.49959800  |
| H | -5.11635400 | 1.62696900  | 4.16484200  |
| H | -6.10776700 | -0.70347700 | 0.68262300  |
| H | -6.65911200 | 0.07662000  | 2.98505400  |
| H | -2.26595900 | 1.49581800  | -0.79067700 |
| N | -0.43408900 | 1.22140500  | -3.23753700 |
| N | -1.43473200 | 1.31336200  | -2.64819900 |
| N | -2.47933700 | 1.37967400  | -2.05690700 |

H 1.58698800 1.18291300 -1.91000200

**S-TS2**

C 0.41598700 -3.44149100 -1.83720400  
C -1.06827700 -3.24487400 -1.52348600  
C -0.90976800 -1.83647400 -2.00236300  
C 0.48221800 -2.00489300 -2.17129100  
O 1.22475400 -4.35738700 -1.76990200  
O -1.94474300 -3.91151800 -1.00093100  
N -1.66011200 -0.72711800 -2.15771500  
H -1.13445500 0.08926300 -2.50209800  
N 1.49580000 -1.16999200 -2.44299700  
H 1.26115000 -0.17272600 -2.47545500  
C -2.92995500 -0.46396900 -1.62331400  
C -3.79780800 -1.48012500 -1.20983900  
C -3.28583800 0.87983700 -1.43462200  
C -4.99623900 -1.13683800 -0.58666300  
H -3.51587800 -2.52241800 -1.30628700  
C -4.48633400 1.19340200 -0.80975900  
H -2.59819200 1.67676200 -1.69455600  
C -5.35756100 0.19198300 -0.38165800  
H -6.27992600 0.44198500 0.12756400  
C -4.84324600 2.63169200 -0.54765700  
C -5.84108600 -2.22750300 0.00869300  
F -5.77216200 -3.37375600 -0.69314500  
F -7.14178100 -1.87381200 0.09499200  
F -5.43142900 -2.51468500 1.27528400  
F -5.42519900 2.77063700 0.67151400  
F -5.72877900 3.10255500 -1.45461600  
F -3.76770900 3.43797400 -0.57447700  
C 2.86459700 -1.54587700 -2.09172200  
H 3.00357500 -2.57218000 -2.43201900  
C 3.90230400 -0.65820800 -2.84318500  
C 5.32084000 -1.12043900 -2.46999600  
H 5.49074800 -2.16345000 -2.75879100  
H 6.06150600 -0.50855400 -2.99548000  
H 5.51369400 -1.02362000 -1.39527000  
C 3.75394600 0.83484900 -2.50203800  
H 3.88589600 1.02223100 -1.43380100  
H 4.51717700 1.40410500 -3.04517400  
H 2.77765500 1.22694900 -2.80278500  
C 3.68741100 -0.85561500 -4.35406900  
H 2.69199200 -0.52277600 -4.66001700  
H 4.42940100 -0.27862500 -4.91717800

|   |             |             |             |
|---|-------------|-------------|-------------|
| H | 3.79489500  | -1.91018600 | -4.63410900 |
| C | 3.00746300  | -1.49961800 | -0.55445400 |
| O | 2.57829400  | -0.51805000 | 0.08356100  |
| N | 3.56350500  | -2.55690900 | 0.07051300  |
| C | 3.63873600  | -2.60350200 | 1.54449500  |
| C | 4.10448900  | -3.78958100 | -0.55237800 |
| C | 4.66698600  | -3.72713800 | 1.78587800  |
| H | 4.00519600  | -1.63908900 | 1.90863400  |
| C | 4.37181500  | -4.70821800 | 0.64575200  |
| H | 3.37813000  | -4.21369500 | -1.24666200 |
| H | 5.68245900  | -3.32392900 | 1.69078600  |
| H | 5.19150000  | -5.40449900 | 0.45148500  |
| H | 3.47566000  | -5.29324600 | 0.87410400  |
| H | 5.03299800  | -3.55644400 | -1.08272000 |
| H | 4.56123600  | -4.16772900 | 2.77978200  |
| C | 2.29322500  | -2.89891900 | 2.19357200  |
| C | 1.24407700  | -3.48951700 | 1.48509400  |
| C | 2.11203900  | -2.61276000 | 3.55205400  |
| C | 0.02532000  | -3.76220400 | 2.10930700  |
| H | 1.37518400  | -3.75289700 | 0.44439500  |
| C | 0.89548800  | -2.87949300 | 4.17966700  |
| H | 2.92802100  | -2.17112300 | 4.12122500  |
| C | -0.15597600 | -3.44735000 | 3.45600800  |
| H | -0.77523700 | -4.21391300 | 1.52973300  |
| H | 0.76776900  | -2.64237600 | 5.23229900  |
| H | -1.10651800 | -3.64760100 | 3.94154300  |
| C | 3.46090900  | 6.12075400  | 0.34538400  |
| C | 2.24899600  | 5.56426300  | 0.74692400  |
| C | 1.74456000  | 4.42824400  | 0.09875100  |
| C | 2.45795300  | 3.86850500  | -0.97110900 |
| C | 3.66364000  | 4.43509300  | -1.37832200 |
| C | 4.17143200  | 5.55579900  | -0.71646400 |
| H | 3.85251400  | 6.99277600  | 0.86074000  |
| H | 1.68506100  | 5.97874100  | 1.57507400  |
| H | 2.07384600  | 3.00930600  | -1.50583500 |
| H | 4.20227000  | 4.00289800  | -2.21623600 |
| H | 5.11600000  | 5.99053300  | -1.03101700 |
| C | 0.49177600  | 3.83225800  | 0.66141800  |
| C | 0.42396600  | 2.32095300  | 0.64758600  |
| O | -0.31207200 | 4.50534900  | 1.28226600  |
| S | 1.88256600  | 2.15154700  | 2.37628900  |
| O | 1.78935800  | 3.19615400  | 3.43590700  |
| C | 3.57715100  | 2.00286100  | 1.75127500  |
| H | 3.83345600  | 2.94983500  | 1.27582800  |



|   |             |             |             |
|---|-------------|-------------|-------------|
| H | 3.58953800  | 1.17467300  | 1.03820700  |
| H | 4.22759500  | 1.81100600  | 2.60899700  |
| C | 1.61784400  | 0.50437000  | 3.05143500  |
| H | 2.29759600  | 0.38802700  | 3.89816300  |
| H | 1.82427400  | -0.21932600 | 2.26210700  |
| H | 0.58018800  | 0.43095800  | 3.37800400  |
| C | -0.71059300 | 1.51212600  | 1.07032200  |
| C | -1.83846900 | 2.04308300  | 1.72937600  |
| C | -0.63826900 | 0.12207100  | 0.83444400  |
| C | -2.86419300 | 1.19363500  | 2.13012800  |
| H | -1.90039400 | 3.11039400  | 1.88842100  |
| C | -1.66291500 | -0.71713900 | 1.25353300  |
| H | 0.23540100  | -0.28845900 | 0.33759200  |
| C | -2.77927200 | -0.18281800 | 1.90080200  |
| H | -3.74864800 | 1.61179100  | 2.59940100  |
| H | -1.60477100 | -1.78162200 | 1.05852000  |
| H | -3.59590400 | -0.83695100 | 2.18887000  |
| H | 1.10211600  | 1.81668500  | -0.03579100 |
| N | 0.23418100  | 1.38954300  | -2.84756100 |
| N | -0.19925400 | 2.28304700  | -2.19480300 |
| N | -0.64329600 | 3.15426900  | -1.53684200 |

#### S-TS2-1

|   |             |             |             |
|---|-------------|-------------|-------------|
| C | 0.95137900  | -3.13233600 | -1.95588000 |
| C | -0.52653000 | -3.17915400 | -1.56664200 |
| C | -0.61075300 | -1.74972600 | -1.99280100 |
| C | 0.78165200  | -1.68808400 | -2.22147900 |
| O | 1.88972400  | -3.91618600 | -1.97820100 |
| O | -1.26258100 | -3.99292300 | -1.03373800 |
| N | -1.53135900 | -0.76671300 | -2.07732100 |
| H | -1.16306300 | 0.12684200  | -2.42252400 |
| N | 1.63916400  | -0.69940800 | -2.49722400 |
| H | 1.25848500  | 0.25149100  | -2.49065400 |
| C | -2.83772600 | -0.74889800 | -1.57178800 |
| C | -3.51610000 | -1.91403700 | -1.19377500 |
| C | -3.45333200 | 0.49997000  | -1.40835100 |
| C | -4.79109400 | -1.80905900 | -0.64232300 |
| H | -3.03838900 | -2.88405400 | -1.27696500 |
| C | -4.73085200 | 0.57517600  | -0.86453900 |
| H | -2.92074100 | 1.41360800  | -1.64748100 |
| C | -5.41583900 | -0.57477500 | -0.47500700 |
| H | -6.40995700 | -0.50992000 | -0.05129100 |
| C | -5.33680700 | 1.92482500  | -0.59328000 |
| C | -5.45573100 | -3.05046500 | -0.11666900 |

|   |             |             |             |
|---|-------------|-------------|-------------|
| F | -5.14324300 | -4.14389500 | -0.83632600 |
| F | -6.80145700 | -2.93777400 | -0.09991900 |
| F | -5.07186800 | -3.30133800 | 1.16601300  |
| F | -6.68633000 | 1.88948000  | -0.66495200 |
| F | -4.90322300 | 2.86171600  | -1.45604300 |
| F | -5.02841600 | 2.36281800  | 0.65585700  |
| C | 3.06965500  | -0.87339800 | -2.24770800 |
| H | 3.35154300  | -1.82836000 | -2.69259300 |
| C | 3.89886700  | 0.24093200  | -2.95702300 |
| C | 5.39628300  | -0.06951000 | -2.79285900 |
| H | 5.66016100  | -1.02628800 | -3.25715300 |
| H | 5.99147400  | 0.70954500  | -3.28063400 |
| H | 5.69321200  | -0.10084200 | -1.73849600 |
| C | 3.61537100  | 1.63839000  | -2.37956300 |
| H | 3.89087000  | 1.69471200  | -1.32326900 |
| H | 4.20725800  | 2.37963800  | -2.92855700 |
| H | 2.56500800  | 1.92723800  | -2.47927900 |
| C | 3.54361200  | 0.22294200  | -4.45451900 |
| H | 3.71012500  | -0.76988400 | -4.88903800 |
| H | 2.49888500  | 0.49689400  | -4.62308300 |
| H | 4.17345500  | 0.93888000  | -4.99420900 |
| C | 3.29883600  | -0.93259000 | -0.72029600 |
| O | 2.72840400  | -0.11873600 | 0.02732900  |
| N | 4.10356500  | -1.90263600 | -0.23393200 |
| C | 4.33136800  | -2.03400000 | 1.21804200  |
| C | 4.78506400  | -2.97307100 | -1.00132400 |
| C | 5.56847100  | -2.95304100 | 1.27224700  |
| H | 4.54752500  | -1.04352900 | 1.62946000  |
| C | 5.33575100  | -3.89962800 | 0.08940700  |
| H | 4.07482900  | -3.47882400 | -1.65672800 |
| H | 6.47610500  | -2.35814100 | 1.11508800  |
| H | 6.24129600  | -4.41897700 | -0.23441200 |
| H | 4.58650800  | -4.65290800 | 0.35230200  |
| H | 5.59678000  | -2.54403400 | -1.59624300 |
| H | 5.65312100  | -3.46667900 | 2.23261700  |
| C | 3.13980600  | -2.63014600 | 1.95677500  |
| C | 2.11247000  | -3.29811700 | 1.28755100  |
| C | 3.08645700  | -2.53852500 | 3.35299900  |
| C | 1.03267400  | -3.83606700 | 1.99025900  |
| H | 2.15720500  | -3.41685900 | 0.21400500  |
| C | 2.00984400  | -3.07344500 | 4.06027900  |
| H | 3.88950000  | -2.03608500 | 3.88903200  |
| C | 0.97221500  | -3.71515200 | 3.37877500  |
| H | 0.24728500  | -4.34748700 | 1.44000500  |

|   |             |             |             |
|---|-------------|-------------|-------------|
| H | 1.98013200  | -2.98846100 | 5.14331000  |
| H | 0.13047900  | -4.12647200 | 3.92829800  |
| C | 1.49053700  | 6.77753600  | -0.41067400 |
| C | 0.62133000  | 5.90192800  | 0.22842800  |
| C | 0.92756000  | 4.53556200  | 0.31275400  |
| C | 2.12905700  | 4.06449700  | -0.23492200 |
| C | 3.00392600  | 4.94671300  | -0.86411700 |
| C | 2.68487900  | 6.30110900  | -0.95957400 |
| H | 1.23981900  | 7.83169100  | -0.48419300 |
| H | -0.30976900 | 6.24914300  | 0.66198100  |
| H | 2.40978500  | 3.02188800  | -0.16057600 |
| H | 3.93485400  | 4.57182200  | -1.27792900 |
| H | 3.36517000  | 6.98575100  | -1.45814900 |
| C | -0.04911200 | 3.66298200  | 1.01787000  |
| C | 0.11436800  | 2.16866500  | 0.88872200  |
| O | -0.89714900 | 4.12762000  | 1.77446400  |
| S | 1.49242000  | 2.07358800  | 2.74640500  |
| O | 2.72814000  | 2.91129800  | 2.81681900  |
| C | 1.89940500  | 0.34282800  | 3.05594200  |
| H | 0.99262000  | -0.24112700 | 3.21012600  |
| H | 2.54111300  | 0.32174000  | 3.93906800  |
| H | 2.42345000  | -0.00882200 | 2.16521900  |
| C | 0.37547400  | 2.45740000  | 4.11964400  |
| H | 0.92373800  | 2.31015600  | 5.05296600  |
| H | -0.49450000 | 1.80153200  | 4.05506400  |
| H | 0.06603900  | 3.49614300  | 3.99824200  |
| C | -0.88205100 | 1.16027000  | 1.23240000  |
| C | -2.14137900 | 1.46320300  | 1.78758600  |
| C | -0.53672800 | -0.18925300 | 1.00030000  |
| C | -3.01865200 | 0.43318700  | 2.11037100  |
| H | -2.42188800 | 2.49809600  | 1.92568300  |
| C | -1.41604200 | -1.20986200 | 1.34063200  |
| H | 0.42933500  | -0.42350300 | 0.56239200  |
| C | -2.65935000 | -0.90036400 | 1.89849300  |
| H | -4.00184600 | 0.67588500  | 2.49870300  |
| H | -1.15021100 | -2.24195000 | 1.14333700  |
| H | -3.36238900 | -1.69582700 | 2.12148800  |
| H | 0.89290000  | 1.81332600  | 0.22161900  |
| N | 0.01974500  | 1.68218400  | -2.74342700 |
| N | -0.53375300 | 2.33233100  | -1.92299300 |
| N | -1.12263200 | 2.95074100  | -1.10514000 |

**S-TS2-2**

|   |            |            |             |
|---|------------|------------|-------------|
| C | 0.43680000 | 3.50513200 | -2.28898100 |
|---|------------|------------|-------------|

|   |             |             |             |
|---|-------------|-------------|-------------|
| C | 1.81470000  | 2.83644000  | -2.24967600 |
| C | 1.10190100  | 1.52694600  | -2.36236900 |
| C | -0.16063900 | 2.15265900  | -2.34911000 |
| O | 0.00495900  | 4.64570400  | -2.21863400 |
| O | 2.96057400  | 3.21684600  | -2.09052600 |
| N | 1.40028500  | 0.20678700  | -2.39267500 |
| H | 0.58349300  | -0.40069900 | -2.55143100 |
| N | -1.42791900 | 1.71191200  | -2.29612900 |
| H | -1.54336700 | 0.69937300  | -2.20354000 |
| C | 2.53442800  | -0.42113100 | -1.86483800 |
| C | 3.65492100  | 0.29683000  | -1.43031800 |
| C | 2.47945800  | -1.81094500 | -1.67056800 |
| C | 4.67598900  | -0.37624100 | -0.76356800 |
| H | 3.71452500  | 1.37084900  | -1.57434700 |
| C | 3.52215600  | -2.45927500 | -1.02030700 |
| H | 1.59744500  | -2.37414200 | -1.95468100 |
| C | 4.63046500  | -1.75189800 | -0.55354000 |
| H | 5.41938100  | -2.25622400 | -0.01045100 |
| C | 3.44844400  | -3.94421600 | -0.78762700 |
| C | 5.75116600  | 0.43636800  | -0.10136300 |
| F | 6.07116800  | 1.54204400  | -0.79579200 |
| F | 6.88261900  | -0.27087600 | 0.09959800  |
| F | 5.33402500  | 0.85747000  | 1.13214300  |
| F | 4.09366900  | -4.63485000 | -1.75525200 |
| F | 2.18084300  | -4.39276600 | -0.75077900 |
| F | 4.03441000  | -4.28497400 | 0.38878500  |
| C | -2.43248100 | 2.56000700  | -1.64418900 |
| H | -2.28663400 | 3.56698400  | -2.03515100 |
| C | -3.87960000 | 2.11876300  | -1.99874700 |
| C | -4.86373400 | 3.08541900  | -1.31814000 |
| H | -4.70885100 | 4.11660800  | -1.65561600 |
| H | -5.89347100 | 2.80670100  | -1.56553100 |
| H | -4.76817300 | 3.05999900  | -0.22640700 |
| C | -4.18357300 | 0.68305500  | -1.53741800 |
| H | -4.09218100 | 0.58189300  | -0.45290400 |
| H | -5.21070100 | 0.42510600  | -1.82100000 |
| H | -3.52146500 | -0.04769000 | -2.01310800 |
| C | -4.04471100 | 2.21196000  | -3.52510600 |
| H | -3.84305900 | 3.22832900  | -3.88376900 |
| H | -3.36194300 | 1.52974100  | -4.03903700 |
| H | -5.07004300 | 1.94975800  | -3.80899700 |
| C | -2.12782500 | 2.54095400  | -0.13153100 |
| O | -1.94412800 | 1.45379200  | 0.44276800  |
| N | -1.99046900 | 3.71383000  | 0.52162400  |

|   |             |             |             |
|---|-------------|-------------|-------------|
| C | -1.53603000 | 3.72586200  | 1.92711800  |
| C | -2.24328700 | 5.07516800  | -0.00251600 |
| C | -1.87642800 | 5.16352800  | 2.37522100  |
| H | -2.11622900 | 2.99233100  | 2.49307000  |
| C | -1.68823400 | 5.98852200  | 1.09662200  |
| H | -1.73446900 | 5.22126000  | -0.95599200 |
| H | -2.92187200 | 5.20461400  | 2.70368500  |
| H | -2.20403400 | 6.95175700  | 1.12657700  |
| H | -0.62539000 | 6.18020700  | 0.92107500  |
| H | -3.32052400 | 5.22538700  | -0.13320300 |
| H | -1.24274400 | 5.49078600  | 3.20262700  |
| C | -0.05465100 | 3.40126100  | 2.06663800  |
| C | 0.86822500  | 3.72516400  | 1.06633100  |
| C | 0.41756200  | 2.82965200  | 3.25401000  |
| C | 2.23115700  | 3.47719900  | 1.24264200  |
| H | 0.52899600  | 4.17801900  | 0.14315700  |
| C | 1.77850100  | 2.58130900  | 3.43597200  |
| H | -0.28674800 | 2.58242600  | 4.04598200  |
| C | 2.69099400  | 2.90300000  | 2.42890900  |
| H | 2.92178400  | 3.71954100  | 0.44072800  |
| H | 2.12504500  | 2.12790000  | 4.36063600  |
| H | 3.74759200  | 2.68429600  | 2.55160900  |
| C | -4.94604000 | -5.34284900 | -0.74888500 |
| C | -3.74402100 | -5.07736300 | -0.10533100 |
| C | -3.29065200 | -3.75569700 | 0.03303400  |
| C | -4.07178900 | -2.70541800 | -0.46853200 |
| C | -5.28242000 | -2.97411900 | -1.10240300 |
| C | -5.71900300 | -4.29032700 | -1.24952700 |
| H | -5.28316000 | -6.36876000 | -0.86436000 |
| H | -3.12837000 | -5.87757100 | 0.28962100  |
| H | -3.76426200 | -1.67564500 | -0.35606900 |
| H | -5.88052500 | -2.15152300 | -1.48185600 |
| H | -6.65938700 | -4.49800300 | -1.75213000 |
| C | -2.00163200 | -3.55344000 | 0.74562500  |
| C | -1.37877600 | -2.17466900 | 0.73721900  |
| O | -1.50147700 | -4.44771400 | 1.42134400  |
| S | -2.49200700 | -1.38350100 | 2.51147200  |
| O | -3.93329200 | -1.01772400 | 2.38445900  |
| C | -1.53944700 | 0.00756800  | 3.16516200  |
| H | -0.52183500 | -0.31022100 | 3.39070500  |
| H | -2.06669900 | 0.34625500  | 4.06082400  |
| H | -1.54332100 | 0.76915400  | 2.38116300  |
| C | -2.24859200 | -2.63181500 | 3.80175200  |
| H | -2.60435400 | -2.21606900 | 4.74714700  |

|   |             |             |             |
|---|-------------|-------------|-------------|
| H | -1.18648100 | -2.88064700 | 3.84183300  |
| H | -2.82427000 | -3.51300800 | 3.51762000  |
| C | 0.00612500  | -1.87585100 | 1.09652200  |
| C | 0.86177800  | -2.77396500 | 1.76723000  |
| C | 0.46374700  | -0.57540700 | 0.80633500  |
| C | 2.12965600  | -2.35599600 | 2.15729000  |
| H | 0.52703600  | -3.78582500 | 1.94874200  |
| C | 1.72861600  | -0.16744400 | 1.20836700  |
| H | -0.19493800 | 0.12168800  | 0.30021300  |
| C | 2.56171700  | -1.05166700 | 1.89402800  |
| H | 2.79433900  | -3.05859600 | 2.64963400  |
| H | 2.06297200  | 0.83726300  | 0.98898800  |
| H | 3.55318000  | -0.72839900 | 2.19290300  |
| H | -1.82406200 | -1.44406800 | 0.07037000  |
| N | -1.16694900 | -1.18624300 | -2.58951100 |
| N | -0.97133000 | -2.21637000 | -2.03540700 |
| N | -0.75553800 | -3.22634400 | -1.46291600 |

#### R-C

|   |             |             |             |
|---|-------------|-------------|-------------|
| C | 0.59098000  | -3.61082100 | 2.12440000  |
| C | 2.02916900  | -3.12792500 | 1.85373600  |
| C | 1.53672000  | -1.74731800 | 2.16260000  |
| C | 0.23126100  | -2.19711100 | 2.39318100  |
| O | -0.01269700 | -4.66597100 | 2.07406200  |
| O | 3.06420400  | -3.63020100 | 1.46900100  |
| N | 2.04698000  | -0.49214700 | 2.20192000  |
| H | 1.43839300  | 0.22439900  | 2.58625900  |
| N | -0.94830500 | -1.58916700 | 2.65509700  |
| H | -0.92594300 | -0.57933300 | 2.54309100  |
| C | 3.16638100  | 0.00515000  | 1.52229600  |
| C | 3.90546100  | -0.77120400 | 0.62216100  |
| C | 3.48962800  | 1.35449900  | 1.70829000  |
| C | 4.95128400  | -0.18106700 | -0.07882700 |
| H | 3.67018500  | -1.81520100 | 0.46779400  |
| C | 4.54539200  | 1.91840500  | 1.00158400  |
| H | 2.89488000  | 1.96937600  | 2.37484900  |
| C | 5.29435400  | 1.15695500  | 0.10732800  |
| H | 6.09656900  | 1.60689900  | -0.46467600 |
| C | 4.87764600  | 3.37208000  | 1.19337200  |
| C | 5.61485900  | -0.94426600 | -1.18993700 |
| F | 5.43535500  | -2.27531100 | -1.09154100 |
| F | 6.94118800  | -0.70609700 | -1.25148700 |
| F | 5.09676500  | -0.56580100 | -2.39353000 |
| F | 5.29830300  | 3.93884300  | 0.03811400  |

|   |             |             |             |
|---|-------------|-------------|-------------|
| F | 5.86563000  | 3.54845400  | 2.09857000  |
| F | 3.81140600  | 4.08022500  | 1.62479200  |
| C | -2.14677200 | -2.19131300 | 2.03208900  |
| H | -2.09191100 | -3.25906800 | 2.24201700  |
| C | -3.45569800 | -1.64579700 | 2.66217000  |
| C | -4.65330300 | -2.27640400 | 1.92969400  |
| H | -4.64386700 | -3.36773200 | 2.03095300  |
| H | -5.58838800 | -1.91716000 | 2.37441100  |
| H | -4.66756900 | -2.02303300 | 0.86344300  |
| C | -3.55409700 | -0.11456400 | 2.55248800  |
| H | -3.52070100 | 0.20581800  | 1.51049900  |
| H | -4.50181500 | 0.22106400  | 2.98921100  |
| H | -2.75191400 | 0.38899400  | 3.10484700  |
| C | -3.47966800 | -2.05566100 | 4.14395400  |
| H | -2.62477900 | -1.63911400 | 4.68522200  |
| H | -4.39835800 | -1.69607400 | 4.62106900  |
| H | -3.44872800 | -3.14626100 | 4.25120100  |
| C | -2.00285200 | -1.93677400 | 0.51694600  |
| O | -1.71414900 | -0.78980700 | 0.12749900  |
| N | -2.07529500 | -2.98585100 | -0.31814900 |
| C | -1.83039200 | -2.80122900 | -1.76219800 |
| C | -2.53224600 | -4.35491900 | 0.00588000  |
| C | -2.50525100 | -4.04399600 | -2.37589500 |
| H | -2.35019700 | -1.90186900 | -2.08109100 |
| C | -2.31252000 | -5.12145600 | -1.30310900 |
| H | -1.95704100 | -4.77135200 | 0.83454300  |
| H | -3.56967800 | -3.82471800 | -2.51365200 |
| H | -3.00519300 | -5.96138100 | -1.40306800 |
| H | -1.29263800 | -5.51785300 | -1.33939300 |
| H | -3.59417400 | -4.33235400 | 0.27006300  |
| H | -2.07060800 | -4.30913300 | -3.34264200 |
| C | -0.35290100 | -2.68876800 | -2.09369200 |
| C | 0.63614600  | -3.32143700 | -1.33254900 |
| C | 0.03340500  | -1.97216200 | -3.23272300 |
| C | 1.98134500  | -3.23783700 | -1.69759100 |
| H | 0.35816800  | -3.88574700 | -0.44976400 |
| C | 1.37432300  | -1.89601800 | -3.60777600 |
| H | -0.72413100 | -1.46864400 | -3.82918500 |
| C | 2.35500400  | -2.52713600 | -2.83893100 |
| H | 2.73218500  | -3.72549800 | -1.08390700 |
| H | 1.65593900  | -1.32624600 | -4.48890600 |
| H | 3.40212200  | -2.44585200 | -3.11130900 |
| C | -5.56799500 | 4.80942800  | -0.86311300 |
| C | -4.24045200 | 4.56739800  | -1.19912200 |

|   |             |             |             |
|---|-------------|-------------|-------------|
| C | -3.46512500 | 3.67228700  | -0.44267700 |
| C | -4.04724800 | 3.02509000  | 0.65637000  |
| C | -5.38020500 | 3.26227500  | 0.98721000  |
| C | -6.14174800 | 4.15353700  | 0.23120400  |
| H | -6.15795300 | 5.50607500  | -1.45135800 |
| H | -3.77762700 | 5.05546800  | -2.04992200 |
| H | -3.46765000 | 2.33919100  | 1.25643200  |
| H | -5.82103700 | 2.74816800  | 1.83596700  |
| H | -7.17975800 | 4.33891600  | 0.49231100  |
| C | -2.06931900 | 3.41540400  | -0.90910200 |
| C | -1.16136400 | 2.45680000  | -0.10969000 |
| O | -1.67055400 | 3.88692600  | -1.96019200 |
| S | -4.27428300 | 0.24637100  | -1.32291900 |
| O | -4.56654800 | -1.24385500 | -1.43685100 |
| C | -3.11320600 | 0.67327900  | -2.67432900 |
| H | -2.12910900 | 0.30191900  | -2.38419500 |
| H | -3.07395600 | 1.75520800  | -2.81669000 |
| H | -3.45433400 | 0.17471400  | -3.58630800 |
| C | -5.72327600 | 1.11190700  | -2.02848900 |
| H | -5.93177300 | 0.71309800  | -3.02503600 |
| H | -5.52882200 | 2.18650500  | -2.06233500 |
| H | -6.56738900 | 0.91025300  | -1.36565500 |
| C | 0.22808900  | 2.32055700  | -0.67674200 |
| C | 1.05800400  | 3.44355700  | -0.80232800 |
| C | 0.69671600  | 1.06342200  | -1.06941800 |
| C | 2.33105900  | 3.31429600  | -1.34646700 |
| H | 0.69820000  | 4.41648100  | -0.48273000 |
| C | 1.97420200  | 0.93925100  | -1.62180900 |
| H | 0.06830300  | 0.18671100  | -0.94465800 |
| C | 2.78371400  | 2.06187900  | -1.77206400 |
| H | 2.97434200  | 4.18420500  | -1.43362500 |
| H | 2.33221300  | -0.03452700 | -1.93011900 |
| H | 3.77368700  | 1.95505600  | -2.20291700 |
| H | -1.64691200 | 1.47275100  | -0.09209200 |
| N | -0.12379200 | 1.54206400  | 2.91272500  |
| N | -0.59895300 | 2.20190300  | 2.10305500  |
| N | -1.12629200 | 2.96773600  | 1.31465100  |

#### R-TS1

|   |             |             |             |
|---|-------------|-------------|-------------|
| C | -2.65351700 | -2.80497100 | 0.13450500  |
| C | -1.20671500 | -3.11543400 | -0.27195300 |
| C | -0.78268700 | -2.17590400 | 0.81284900  |
| C | -2.11657900 | -1.80708400 | 1.07811100  |
| O | -3.76734400 | -3.18755500 | -0.19589200 |



|   |             |             |             |
|---|-------------|-------------|-------------|
| O | -0.66588800 | -3.75288300 | -1.15511300 |
| N | 0.35423200  | -1.77661900 | 1.41190800  |
| H | 0.23934000  | -1.13794500 | 2.20047500  |
| N | -2.66336000 | -0.86986700 | 1.87911700  |
| H | -2.04635400 | -0.08637000 | 2.07383300  |
| C | 1.68191100  | -1.94442100 | 0.99976400  |
| C | 2.03591600  | -2.52614500 | -0.22415000 |
| C | 2.68193000  | -1.46497500 | 1.85570600  |
| C | 3.38329700  | -2.62279400 | -0.56136300 |
| H | 1.27186200  | -2.89166200 | -0.90175900 |
| C | 4.02137200  | -1.57185300 | 1.49222600  |
| H | 2.40890100  | -1.00944300 | 2.80118600  |
| C | 4.38925000  | -2.15914400 | 0.28608200  |
| H | 5.42797100  | -2.21875300 | -0.00458800 |
| C | 5.05979200  | -1.05143500 | 2.44552700  |
| C | 3.73749100  | -3.23202400 | -1.89016800 |
| F | 3.50574800  | -4.56137100 | -1.91435300 |
| F | 5.04221200  | -3.04868000 | -2.20502400 |
| F | 3.00856900  | -2.69040800 | -2.89536100 |
| F | 5.15556300  | -1.82639900 | 3.55076500  |
| F | 4.75763700  | 0.19655000  | 2.87594900  |
| F | 6.28999800  | -0.99942600 | 1.88909500  |
| C | -4.07875200 | -0.50895000 | 1.76571300  |
| H | -4.62390500 | -1.44283900 | 1.63291600  |
| C | -4.58108700 | 0.14901600  | 3.08547400  |
| C | -6.04561600 | 0.57889300  | 2.89662400  |
| H | -6.68056400 | -0.27411000 | 2.63037900  |
| H | -6.43560900 | 1.00276200  | 3.82818400  |
| H | -6.14787100 | 1.34109000  | 2.11605800  |
| C | -3.73862900 | 1.37702500  | 3.47760100  |
| H | -3.76499100 | 2.14092500  | 2.69740600  |
| H | -4.13794200 | 1.81020500  | 4.40150200  |
| H | -2.69300200 | 1.11424500  | 3.67393700  |
| C | -4.49718800 | -0.90401400 | 4.20324000  |
| H | -5.12286000 | -1.77499800 | 3.97384100  |
| H | -3.46899000 | -1.25070700 | 4.33958100  |
| H | -4.84502300 | -0.47882400 | 5.15130600  |
| C | -4.28135100 | 0.38804600  | 0.52554700  |
| O | -3.59935300 | 1.41313500  | 0.36711000  |
| N | -5.19084000 | 0.00276300  | -0.39745900 |
| C | -5.30845300 | 0.75267300  | -1.66222600 |
| C | -6.14251600 | -1.12785400 | -0.32134900 |
| C | -6.65541300 | 0.25296000  | -2.22467000 |
| H | -5.33678600 | 1.82258200  | -1.43812300 |

|   |             |             |             |
|---|-------------|-------------|-------------|
| C | -6.71793900 | -1.20050800 | -1.74028000 |
| H | -5.62742800 | -2.04719000 | -0.04227100 |
| H | -7.47406000 | 0.83645600  | -1.78651700 |
| H | -7.72845100 | -1.61721000 | -1.75253500 |
| H | -6.08136500 | -1.83590400 | -2.36402000 |
| H | -6.92645900 | -0.90204600 | 0.41136000  |
| H | -6.70470400 | 0.35359700  | -3.31146300 |
| C | -4.14006800 | 0.48132500  | -2.60028600 |
| C | -3.82944700 | 1.41064800  | -3.60018000 |
| C | -3.37896500 | -0.68745100 | -2.50696000 |
| C | -2.77345800 | 1.17872100  | -4.48229300 |
| H | -4.41300500 | 2.32554200  | -3.68266200 |
| C | -2.31347600 | -0.91882800 | -3.37840600 |
| H | -3.61308800 | -1.42312400 | -1.74908800 |
| C | -2.00712700 | 0.01522200  | -4.36953400 |
| H | -2.54349100 | 1.91011500  | -5.25257800 |
| H | -1.72433200 | -1.82509900 | -3.26842900 |
| H | -1.17648300 | -0.16002800 | -5.04704500 |
| C | 5.38209600  | 0.17642500  | -2.03037400 |
| C | 4.00187400  | 0.32959700  | -1.95367500 |
| C | 3.43225800  | 1.06682700  | -0.90614900 |
| C | 4.25558700  | 1.62971600  | 0.07886000  |
| C | 5.63541900  | 1.45818400  | 0.00865100  |
| C | 6.19973300  | 0.74152400  | -1.04860100 |
| H | 5.81641300  | -0.40711700 | -2.83583100 |
| H | 3.34489600  | -0.13911600 | -2.67702700 |
| H | 3.82103600  | 2.15692400  | 0.92041400  |
| H | 6.26779500  | 1.86375700  | 0.79167100  |
| H | 7.27683800  | 0.60866400  | -1.09710300 |
| C | 1.95157800  | 1.16839700  | -0.85662300 |
| C | 1.36251700  | 2.27842100  | -0.05108100 |
| O | 1.23766100  | 0.35468100  | -1.44993900 |
| S | -0.39940900 | 2.01146100  | 0.02057800  |
| O | -0.70288900 | 0.78197900  | 0.77786500  |
| C | -1.08255400 | 3.43475600  | 0.87738900  |
| H | -0.92123100 | 4.34241600  | 0.29554700  |
| H | -2.14163200 | 3.19633400  | 0.99629600  |
| H | -0.57168900 | 3.49108300  | 1.84044800  |
| C | -1.22231900 | 2.06604800  | -1.57532400 |
| H | -2.29094100 | 2.02128600  | -1.36203000 |
| H | -0.92724000 | 2.99302500  | -2.07177400 |
| H | -0.88883600 | 1.19108600  | -2.12861300 |
| C | 1.75653400  | 3.68320400  | -0.41050400 |
| C | 1.90191900  | 4.05390500  | -1.75735800 |

|   |            |            |             |
|---|------------|------------|-------------|
| C | 1.98585100 | 4.64499100 | 0.58555800  |
| C | 2.26308300 | 5.35471000 | -2.10267000 |
| H | 1.74504100 | 3.30952700 | -2.53383400 |
| C | 2.34140400 | 5.94775000 | 0.23810200  |
| H | 1.89989800 | 4.36124700 | 1.62961800  |
| C | 2.47871300 | 6.30625100 | -1.10411200 |
| H | 2.37855100 | 5.62424200 | -3.14851200 |
| H | 2.52090000 | 6.68175400 | 1.01838400  |
| H | 2.76074700 | 7.32064000 | -1.37093300 |
| H | 1.57178700 | 2.09905200 | 1.36540300  |
| N | 0.36888700 | 0.34826300 | 3.61191400  |
| N | 0.97733000 | 1.20946300 | 3.12460900  |
| N | 1.61278400 | 2.11259400 | 2.63789800  |

#### R-TS1-1

|   |             |             |             |
|---|-------------|-------------|-------------|
| C | -2.63205100 | -2.93993500 | 0.27939100  |
| C | -1.20203000 | -3.21187200 | -0.19901800 |
| C | -0.74991000 | -2.22957800 | 0.83743900  |
| C | -2.08141900 | -1.90318900 | 1.17029600  |
| O | -3.74850600 | -3.36741700 | 0.01855300  |
| O | -0.69069300 | -3.86107000 | -1.09136100 |
| N | 0.40521100  | -1.77454800 | 1.35653300  |
| H | 0.31658400  | -1.10545700 | 2.12267800  |
| N | -2.62590600 | -0.98117500 | 1.98971900  |
| H | -2.03484900 | -0.17047600 | 2.14844500  |
| C | 1.72123000  | -1.98213200 | 0.92447700  |
| C | 2.04250200  | -2.68585100 | -0.24513200 |
| C | 2.74365000  | -1.43796300 | 1.71157800  |
| C | 3.38081500  | -2.83776000 | -0.59399200 |
| H | 1.26128100  | -3.11856600 | -0.86103500 |
| C | 4.07497300  | -1.60120400 | 1.33661600  |
| H | 2.49585300  | -0.89783500 | 2.61857600  |
| C | 4.40987300  | -2.30518700 | 0.18556800  |
| H | 5.44420400  | -2.42624000 | -0.10617200 |
| C | 5.14648800  | -1.05486900 | 2.23754700  |
| C | 3.73270000  | -3.52483100 | -1.88450600 |
| F | 2.79673500  | -4.41087800 | -2.26776300 |
| F | 4.91174800  | -4.18190800 | -1.79563000 |
| F | 3.87118300  | -2.63393600 | -2.90615100 |
| F | 5.34087500  | -1.84862100 | 3.31672800  |
| F | 4.82474200  | 0.17048100  | 2.71218300  |
| F | 6.33861600  | -0.94738800 | 1.60938400  |
| C | -4.05897100 | -0.67953200 | 1.94383600  |
| H | -4.57238600 | -1.63608800 | 1.85291000  |

|   |             |             |             |
|---|-------------|-------------|-------------|
| C | -4.51854200 | -0.01939000 | 3.27791300  |
| C | -6.00614300 | 0.35208600  | 3.15833200  |
| H | -6.62052900 | -0.52857800 | 2.93792400  |
| H | -6.36418300 | 0.77658300  | 4.10235000  |
| H | -6.17730500 | 1.09666600  | 2.37283000  |
| C | -3.70481900 | 1.24569000  | 3.60834100  |
| H | -3.79776700 | 1.99434000  | 2.81854400  |
| H | -4.07398600 | 1.67965500  | 4.54428500  |
| H | -2.64163400 | 1.02519500  | 3.75627500  |
| C | -4.33795300 | -1.04982200 | 4.40529500  |
| H | -4.94121900 | -1.94697900 | 4.22133700  |
| H | -3.29182200 | -1.35609900 | 4.49363500  |
| H | -4.65270700 | -0.62202300 | 5.36369000  |
| C | -4.35938500 | 0.18785900  | 0.70266600  |
| O | -3.72380200 | 1.23328300  | 0.49197100  |
| N | -5.30051700 | -0.24500400 | -0.16580800 |
| C | -5.50466400 | 0.47708500  | -1.43585800 |
| C | -6.20720600 | -1.40536100 | -0.02345100 |
| C | -6.85424500 | -0.08497500 | -1.92935600 |
| H | -5.56621200 | 1.54889900  | -1.22824400 |
| C | -6.84274500 | -1.52883600 | -1.41295200 |
| H | -5.64789300 | -2.30005400 | 0.25052800  |
| H | -7.67513100 | 0.47794600  | -1.46908700 |
| H | -7.83736500 | -1.98037500 | -1.37064000 |
| H | -6.21302100 | -2.15560600 | -2.05210600 |
| H | -6.96504300 | -1.19050200 | 0.73940700  |
| H | -6.95289600 | -0.01048600 | -3.01489400 |
| C | -4.36761600 | 0.23589600  | -2.41918200 |
| C | -4.11726200 | 1.17403000  | -3.42747400 |
| C | -3.57614600 | -0.91507200 | -2.35804800 |
| C | -3.09016200 | 0.96921800  | -4.34962100 |
| H | -4.72472300 | 2.07515700  | -3.48469800 |
| C | -2.53981000 | -1.11930600 | -3.27037000 |
| H | -3.76143900 | -1.65669500 | -1.59220300 |
| C | -2.29318800 | -0.17606800 | -4.26957300 |
| H | -2.90692800 | 1.70747600  | -5.12587700 |
| H | -1.92596900 | -2.01188300 | -3.18587200 |
| H | -1.48544600 | -0.33042400 | -4.97916900 |
| C | 5.24364300  | 0.18213900  | -1.94852600 |
| C | 3.86092600  | 0.30496100  | -1.86781500 |
| C | 3.28190600  | 1.11848400  | -0.88495500 |
| C | 4.10043800  | 1.79504600  | 0.03139400  |
| C | 5.48349000  | 1.66086100  | -0.04623100 |
| C | 6.05613800  | 0.86171900  | -1.03830300 |

|   |             |             |             |
|---|-------------|-------------|-------------|
| H | 5.68167700  | -0.46423500 | -2.70267000 |
| H | 3.21172600  | -0.24423900 | -2.53821700 |
| H | 3.66074600  | 2.38579400  | 0.82697200  |
| H | 6.11405200  | 2.15931000  | 0.68300900  |
| H | 7.13587800  | 0.75399000  | -1.08819600 |
| C | 1.80015000  | 1.17571600  | -0.82447900 |
| C | 1.18139600  | 2.31032300  | -0.07791000 |
| O | 1.10648100  | 0.30141700  | -1.35305400 |
| S | -0.56463500 | 1.97098300  | 0.05491700  |
| O | -0.78882300 | 0.77643900  | 0.89177700  |
| C | -1.29318000 | 3.40744200  | 0.84852000  |
| H | -1.17701200 | 4.29021900  | 0.21953300  |
| H | -2.33997700 | 3.13400800  | 0.99721300  |
| H | -0.77028700 | 3.52942600  | 1.79919300  |
| C | -1.42605600 | 1.89208200  | -1.51977900 |
| H | -2.48721000 | 1.81707300  | -1.27933600 |
| H | -1.18102400 | 2.79774800  | -2.07883300 |
| H | -1.06721900 | 0.99957100  | -2.02714900 |
| C | 1.50681000  | 3.70635000  | -0.52507300 |
| C | 1.61229900  | 4.00536300  | -1.89312100 |
| C | 1.71060500  | 4.73197800  | 0.41113100  |
| C | 1.90968100  | 5.29894800  | -2.31757800 |
| H | 1.47474800  | 3.21183800  | -2.62318800 |
| C | 2.00188300  | 6.02708100  | -0.01547100 |
| H | 1.65581100  | 4.50413700  | 1.47095600  |
| C | 2.09998600  | 6.31408800  | -1.37825200 |
| H | 1.99513500  | 5.51352400  | -3.37889600 |
| H | 2.16217200  | 6.81139800  | 0.71866100  |
| H | 2.33214600  | 7.32290800  | -1.70701600 |
| H | 1.43141000  | 2.21596500  | 1.33147500  |
| N | 0.52808500  | 0.34916800  | 3.60094200  |
| N | 1.00103200  | 1.28759800  | 3.10686400  |
| N | 1.49111000  | 2.27068300  | 2.60555800  |

#### R-TS1-2

|   |             |             |             |
|---|-------------|-------------|-------------|
| C | -1.40944900 | -3.23695400 | -0.95472800 |
| C | 0.07448900  | -3.06887900 | -1.29412400 |
| C | 0.19985000  | -2.29346100 | -0.01746100 |
| C | -1.16932800 | -2.44270200 | 0.27119200  |
| O | -2.38593500 | -3.76082800 | -1.46926900 |
| O | 0.79359300  | -3.38202300 | -2.22258600 |
| N | 1.16964700  | -1.65851000 | 0.67990500  |
| H | 0.87525200  | -1.19623600 | 1.53655200  |
| N | -1.96818300 | -2.05189100 | 1.27337900  |

|   |             |             |             |
|---|-------------|-------------|-------------|
| H | -1.67957100 | -1.24809900 | 1.82727500  |
| C | 2.54013900  | -1.55688600 | 0.37586800  |
| C | 3.04478000  | -1.81307900 | -0.90385700 |
| C | 3.40535800  | -1.16156100 | 1.40201700  |
| C | 4.40693200  | -1.64979000 | -1.13835000 |
| H | 2.39269100  | -2.14844600 | -1.69962900 |
| C | 4.76568400  | -1.01035200 | 1.14330100  |
| H | 3.01803800  | -0.94781600 | 2.39099200  |
| C | 5.27952300  | -1.24853000 | -0.12809000 |
| H | 6.33477700  | -1.11091300 | -0.32813900 |
| C | 5.69496800  | -0.65942500 | 2.27253600  |
| C | 4.96320300  | -1.84802800 | -2.52064500 |
| F | 4.07402300  | -2.40318700 | -3.36668200 |
| F | 6.06264800  | -2.63547400 | -2.50675600 |
| F | 5.34976800  | -0.66609400 | -3.07179100 |
| F | 5.11403400  | 0.16713000  | 3.16873300  |
| F | 6.82400600  | -0.06829700 | 1.83679200  |
| F | 6.06975700  | -1.77016900 | 2.95731100  |
| C | -3.40339300 | -2.34348300 | 1.24177800  |
| H | -3.54546300 | -3.08830700 | 0.46036700  |
| C | -3.89424900 | -2.97082600 | 2.58160900  |
| C | -5.42046400 | -3.14661500 | 2.51023700  |
| H | -5.71121300 | -3.76545000 | 1.65284400  |
| H | -5.78619800 | -3.64388300 | 3.41515600  |
| H | -5.93475300 | -2.18242200 | 2.43023200  |
| C | -3.53047300 | -2.10046300 | 3.79628000  |
| H | -3.99112900 | -1.11274500 | 3.73069200  |
| H | -3.87287500 | -2.59079700 | 4.71477600  |
| H | -2.44627400 | -1.96722700 | 3.87914700  |
| C | -3.22538000 | -4.34851400 | 2.72078000  |
| H | -3.48954200 | -5.00580100 | 1.88383400  |
| H | -2.13540600 | -4.25407700 | 2.74571800  |
| H | -3.54572700 | -4.83548900 | 3.64863700  |
| C | -4.13582700 | -1.04749300 | 0.88200400  |
| O | -3.99035700 | -0.03883600 | 1.58667500  |
| N | -4.91543900 | -1.03132200 | -0.22016900 |
| C | -5.63211100 | 0.20333500  | -0.58061200 |
| C | -5.26588800 | -2.17185300 | -1.09456100 |
| C | -6.75035500 | -0.32483700 | -1.50652500 |
| H | -6.03657200 | 0.65085600  | 0.33111200  |
| C | -6.08710900 | -1.51545800 | -2.21056200 |
| H | -4.37144200 | -2.68213000 | -1.45776900 |
| H | -7.59603500 | -0.66682900 | -0.89797400 |
| H | -6.80435900 | -2.21049500 | -2.65457900 |

|   |             |             |             |
|---|-------------|-------------|-------------|
| H | -5.42412100 | -1.16032900 | -3.00625900 |
| H | -5.87500200 | -2.89395000 | -0.53673200 |
| H | -7.10981800 | 0.44436600  | -2.19393300 |
| C | -4.75033500 | 1.22860800  | -1.27577700 |
| C | -3.60596000 | 0.86455200  | -1.99074100 |
| C | -5.14230100 | 2.57292100  | -1.26877400 |
| C | -2.88645500 | 1.81872300  | -2.71171200 |
| H | -3.26050000 | -0.16287900 | -1.96335300 |
| C | -4.42469700 | 3.53010400  | -1.98461800 |
| H | -6.02327600 | 2.86855200  | -0.70304100 |
| C | -3.29832800 | 3.15171200  | -2.71961300 |
| H | -1.99521300 | 1.52106600  | -3.25540600 |
| H | -4.74675300 | 4.56797100  | -1.97284700 |
| H | -2.73794200 | 3.89169300  | -3.28421800 |
| C | 1.11151600  | -0.27561000 | -3.59029400 |
| C | 0.30000300  | 0.02627100  | -2.50354100 |
| C | 0.74527400  | 0.91358900  | -1.50990700 |
| C | 2.00993800  | 1.50815200  | -1.63369400 |
| C | 2.82321500  | 1.20109300  | -2.71999200 |
| C | 2.37748200  | 0.30783100  | -3.69610800 |
| H | 0.77582700  | -0.99394400 | -4.33087500 |
| H | -0.66830100 | -0.44433200 | -2.38230700 |
| H | 2.37595500  | 2.19083300  | -0.87848200 |
| H | 3.81791300  | 1.62843600  | -2.78176200 |
| H | 3.03038100  | 0.04099100  | -4.52041800 |
| C | -0.10694800 | 1.09887400  | -0.31556000 |
| C | 0.36727000  | 2.03547200  | 0.75272000  |
| O | -1.15987300 | 0.46990500  | -0.16594100 |
| S | -0.52829700 | 1.61079500  | 2.24931000  |
| O | -0.41899300 | 0.17424400  | 2.64078200  |
| C | 0.24171800  | 2.61728900  | 3.52537800  |
| H | 0.06210600  | 3.67133700  | 3.31031900  |
| H | -0.21696200 | 2.31574300  | 4.46920500  |
| H | 1.31199800  | 2.39027800  | 3.49675900  |
| C | -2.23356200 | 2.18705400  | 2.23969000  |
| H | -2.61308200 | 2.10230500  | 3.26028500  |
| H | -2.22083700 | 3.22330400  | 1.89680100  |
| H | -2.79860400 | 1.53174300  | 1.57371400  |
| C | 0.24304900  | 3.50255600  | 0.42448400  |
| C | -0.83081900 | 3.95063000  | -0.36256100 |
| C | 1.18773400  | 4.43292300  | 0.88437800  |
| C | -0.95752800 | 5.30008800  | -0.68326200 |
| H | -1.56584200 | 3.24117300  | -0.72825200 |
| C | 1.05500600  | 5.78363300  | 0.56385600  |

|   |             |            |             |
|---|-------------|------------|-------------|
| H | 2.02582900  | 4.08687000 | 1.48030400  |
| C | -0.01597500 | 6.22049000 | -0.21850400 |
| H | -1.79318600 | 5.62696600 | -1.29516200 |
| H | 1.79565500  | 6.49416600 | 0.91897000  |
| H | -0.11280500 | 7.27304300 | -0.46865200 |
| H | 1.65154000  | 1.81799600 | 1.21628100  |
| N | 4.74286100  | 2.15436600 | 0.64253400  |
| N | 3.77249600  | 1.98494000 | 1.24505300  |
| N | 2.76673500  | 1.79080600 | 1.89950900  |

**R-B**

|   |             |             |             |
|---|-------------|-------------|-------------|
| C | -1.47487000 | -3.02875800 | -0.91856800 |
| C | -0.01880100 | -2.85908700 | -1.36248100 |
| C | 0.24381300  | -2.27543600 | -0.01651600 |
| C | -1.11210200 | -2.37879600 | 0.35822000  |
| O | -2.50362800 | -3.47827000 | -1.40823800 |
| O | 0.61665900  | -3.06156600 | -2.38133900 |
| N | 1.28139400  | -1.80447600 | 0.70180800  |
| H | 1.03526100  | -1.47220000 | 1.65100500  |
| N | -1.78330000 | -2.00961400 | 1.45513700  |
| H | -1.29264500 | -1.39319200 | 2.10749700  |
| C | 2.63099700  | -1.73811600 | 0.36566900  |
| C | 3.11133800  | -1.93722700 | -0.93694600 |
| C | 3.53279500  | -1.45171000 | 1.40394100  |
| C | 4.48234800  | -1.86882000 | -1.17017200 |
| H | 2.42366200  | -2.15577300 | -1.74803100 |
| C | 4.89784600  | -1.40593500 | 1.14466600  |
| H | 3.15910000  | -1.29020700 | 2.40952500  |
| C | 5.39063800  | -1.62080700 | -0.14170200 |
| H | 6.45387800  | -1.57612100 | -0.34035100 |
| C | 5.85073500  | -1.04140400 | 2.24725300  |
| C | 4.99828500  | -2.08726600 | -2.56631100 |
| F | 6.14979700  | -1.39758000 | -2.78330200 |
| F | 4.11425800  | -1.68288900 | -3.50187000 |
| F | 5.27371000  | -3.38608300 | -2.80981600 |
| F | 7.05625000  | -1.62778400 | 2.08529200  |
| F | 5.38427400  | -1.38833300 | 3.46290200  |
| F | 6.07899100  | 0.30105200  | 2.28671600  |
| C | -3.21882900 | -2.21643600 | 1.60672500  |
| H | -3.44143700 | -3.18070000 | 1.14936000  |
| C | -3.60971800 | -2.32622200 | 3.11312500  |
| C | -5.11569900 | -2.62543200 | 3.20802600  |
| H | -5.36878600 | -3.56484400 | 2.70317600  |
| H | -5.41175800 | -2.72351900 | 4.25783100  |



|   |             |             |             |
|---|-------------|-------------|-------------|
| H | -5.71926100 | -1.82411700 | 2.76693100  |
| C | -3.30097200 | -1.03913300 | 3.89968100  |
| H | -3.88392200 | -0.19501600 | 3.52327300  |
| H | -3.56186100 | -1.19170900 | 4.95319500  |
| H | -2.23790500 | -0.77640100 | 3.86674200  |
| C | -2.82111500 | -3.49698700 | 3.72621700  |
| H | -3.00719600 | -4.42921200 | 3.17943000  |
| H | -1.74511800 | -3.30383600 | 3.71341500  |
| H | -3.12677700 | -3.64892800 | 4.76737300  |
| C | -4.00748600 | -1.11905900 | 0.86295800  |
| O | -3.77819100 | 0.08527100  | 1.06320300  |
| N | -4.95262000 | -1.50343000 | -0.02181800 |
| C | -5.68496500 | -0.48297900 | -0.79322800 |
| C | -5.37706800 | -2.87969100 | -0.36299100 |
| C | -6.86152400 | -1.28914100 | -1.38284400 |
| H | -6.03290000 | 0.29459400  | -0.10691800 |
| C | -6.25095600 | -2.67750400 | -1.60489700 |
| H | -4.50833600 | -3.50349000 | -0.57159600 |
| H | -7.67394500 | -1.34301900 | -0.64817900 |
| H | -6.99864900 | -3.46727400 | -1.71501500 |
| H | -5.62141000 | -2.67608800 | -2.50049300 |
| H | -5.95866500 | -3.30401400 | 0.46369600  |
| H | -7.25190300 | -0.83127300 | -2.29472700 |
| C | -4.82810700 | 0.16851700  | -1.86998300 |
| C | -5.24844800 | 1.38320700  | -2.42659500 |
| C | -3.65262200 | -0.42157200 | -2.34276800 |
| C | -4.50911600 | 1.99710300  | -3.43763400 |
| H | -6.16090700 | 1.85200200  | -2.06317000 |
| C | -2.90583000 | 0.19534600  | -3.34823800 |
| H | -3.31596600 | -1.36458400 | -1.93004700 |
| C | -3.33070800 | 1.40470700  | -3.90056900 |
| H | -4.84917800 | 2.93872500  | -3.86029800 |
| H | -1.98932800 | -0.27401000 | -3.69344800 |
| H | -2.74702400 | 1.88450100  | -4.68076800 |
| C | 4.01545100  | 1.46396100  | -2.72718600 |
| C | 2.70245100  | 1.87224900  | -2.54598100 |
| C | 2.21974500  | 2.15744700  | -1.25436800 |
| C | 3.07576700  | 2.01958000  | -0.14629900 |
| C | 4.39851600  | 1.63369500  | -0.33885100 |
| C | 4.86745100  | 1.35630300  | -1.62321900 |
| H | 4.37726600  | 1.21369000  | -3.71895600 |
| H | 2.02170600  | 1.96804800  | -3.38439600 |
| H | 2.72717100  | 2.18807000  | 0.86698800  |
| H | 5.05085200  | 1.51266300  | 0.51722400  |

|   |             |             |             |
|---|-------------|-------------|-------------|
| H | 5.89014500  | 1.02420500  | -1.76583300 |
| C | 0.81747800  | 2.58648200  | -1.13906900 |
| C | 0.25283900  | 2.88234300  | 0.26163000  |
| O | 0.07603300  | 2.72934800  | -2.10684600 |
| S | -1.26834700 | 1.85896500  | 0.41035800  |
| O | -0.91935300 | 0.46226400  | 0.10643800  |
| C | -1.85086000 | 2.15264900  | 2.08380300  |
| H | -2.25958200 | 3.16363300  | 2.12451100  |
| H | -2.61410500 | 1.38866400  | 2.24153800  |
| H | -0.98824500 | 2.05222500  | 2.74674300  |
| C | -2.58030200 | 2.50235100  | -0.62188600 |
| H | -3.45870100 | 1.91462800  | -0.35008500 |
| H | -2.69817900 | 3.56582300  | -0.40902900 |
| H | -2.28787700 | 2.33014300  | -1.65584500 |
| C | 0.02634200  | 4.33673200  | 0.57849900  |
| C | -0.47258000 | 5.23565000  | -0.37472900 |
| C | 0.31869800  | 4.78503600  | 1.87511800  |
| C | -0.68648600 | 6.56841100  | -0.02691800 |
| H | -0.67218000 | 4.89082400  | -1.38359900 |
| C | 0.10233800  | 6.11961500  | 2.21435900  |
| H | 0.71482500  | 4.08322400  | 2.60383900  |
| C | -0.40327700 | 7.01146200  | 1.26669700  |
| H | -1.06836000 | 7.26274700  | -0.76949900 |
| H | 0.33394100  | 6.46290700  | 3.21817800  |
| H | -0.56950400 | 8.05121600  | 1.53292500  |
| H | 0.83278100  | 2.41055800  | 1.06443800  |
| N | 0.33659200  | -0.63737000 | 3.11729200  |
| N | 0.75958000  | 0.47032800  | 3.03681200  |
| N | 1.16782400  | 1.57587800  | 2.95889400  |

#### R-B-1

|   |             |             |             |
|---|-------------|-------------|-------------|
| C | -2.66742600 | -2.97717100 | 0.03290400  |
| C | -1.21567400 | -3.28393200 | -0.34790600 |
| C | -0.81203700 | -2.45733400 | 0.82330600  |
| C | -2.14517300 | -2.08438300 | 1.08989900  |
| O | -3.77666900 | -3.28534800 | -0.38194700 |
| O | -0.65624400 | -3.85678500 | -1.26713900 |
| N | 0.31059500  | -2.08228100 | 1.46829700  |
| H | 0.14267000  | -1.48436900 | 2.29368200  |
| N | -2.69309800 | -1.20021900 | 1.93282300  |
| H | -2.04233100 | -0.57957900 | 2.42280900  |
| C | 1.62962500  | -2.12045400 | 1.02115900  |
| C | 2.00798100  | -2.65206200 | -0.22034800 |
| C | 2.60796200  | -1.56738700 | 1.86289200  |

|   |             |             |             |
|---|-------------|-------------|-------------|
| C | 3.35240700  | -2.62877400 | -0.58782300 |
| H | 1.26293300  | -3.08571100 | -0.88180200 |
| C | 3.94266300  | -1.56458700 | 1.47300900  |
| H | 2.32106100  | -1.13502100 | 2.81499200  |
| C | 4.33439600  | -2.10032100 | 0.24770000  |
| H | 5.37020300  | -2.08433700 | -0.05695000 |
| C | 4.95069400  | -0.96389000 | 2.41191100  |
| C | 3.72123800  | -3.18782900 | -1.93461600 |
| F | 3.43726800  | -4.50263200 | -2.02957100 |
| F | 5.03941300  | -3.04085400 | -2.20988400 |
| F | 3.03973100  | -2.56981800 | -2.93108300 |
| F | 4.97497000  | -1.60746100 | 3.59912600  |
| F | 4.66898800  | 0.33479400  | 2.68532500  |
| F | 6.20709100  | -0.99859900 | 1.91072500  |
| C | -4.09621500 | -0.80775900 | 1.82515400  |
| H | -4.65409100 | -1.71983900 | 1.61288600  |
| C | -4.63035600 | -0.24550200 | 3.17598500  |
| C | -6.12674500 | 0.07185700  | 3.01214700  |
| H | -6.69754700 | -0.82370600 | 2.74050700  |
| H | -6.53463000 | 0.45196200  | 3.95479800  |
| H | -6.29908400 | 0.83534000  | 2.24476800  |
| C | -3.88942100 | 1.02828900  | 3.62219600  |
| H | -4.03471600 | 1.84231000  | 2.90774400  |
| H | -4.28373400 | 1.35106000  | 4.59263900  |
| H | -2.81450900 | 0.85988400  | 3.74964200  |
| C | -4.45562500 | -1.33579000 | 4.24756100  |
| H | -4.96505300 | -2.26235100 | 3.95665000  |
| H | -3.39939100 | -1.56544800 | 4.41166400  |
| H | -4.88346400 | -0.99843600 | 5.19825600  |
| C | -4.27345700 | 0.17526300  | 0.64650200  |
| O | -3.57454300 | 1.19805400  | 0.55676000  |
| N | -5.18583600 | -0.12304400 | -0.30442400 |
| C | -5.30215200 | 0.73380200  | -1.49976400 |
| C | -6.13640100 | -1.25727000 | -0.33115100 |
| C | -6.63486600 | 0.26501700  | -2.12086000 |
| H | -5.35251300 | 1.77909500  | -1.18084200 |
| C | -6.67621800 | -1.22513100 | -1.76401000 |
| H | -5.62315200 | -2.19253400 | -0.10945900 |
| H | -7.46893300 | 0.79414300  | -1.64431900 |
| H | -7.67593200 | -1.66117800 | -1.83727900 |
| H | -6.00728800 | -1.79150700 | -2.42002800 |
| H | -6.93767000 | -1.08489000 | 0.39719000  |
| H | -6.67291100 | 0.45929700  | -3.19526200 |
| C | -4.12473900 | 0.57270800  | -2.45344000 |

|   |             |             |             |
|---|-------------|-------------|-------------|
| C | -3.91777600 | 1.53392900  | -3.45084200 |
| C | -3.25714100 | -0.51950000 | -2.38100600 |
| C | -2.86086700 | 1.40536800  | -4.35276500 |
| H | -4.58698400 | 2.38948700  | -3.52002000 |
| C | -2.18827200 | -0.64495500 | -3.26960200 |
| H | -3.42031900 | -1.28244000 | -1.63303500 |
| C | -1.98681600 | 0.31782900  | -4.25992100 |
| H | -2.71427700 | 2.15803100  | -5.12296200 |
| H | -1.51945900 | -1.49599100 | -3.17788000 |
| H | -1.15397700 | 0.22454400  | -4.95055900 |
| C | 5.26876300  | 0.11794000  | -2.39549600 |
| C | 3.90689500  | 0.38510200  | -2.35054800 |
| C | 3.35692400  | 1.05778500  | -1.24634500 |
| C | 4.18486200  | 1.44127800  | -0.18015700 |
| C | 5.55122800  | 1.18223500  | -0.23626100 |
| C | 6.09321500  | 0.52729000  | -1.34299700 |
| H | 5.68592700  | -0.42278100 | -3.23848700 |
| H | 3.24533300  | 0.06652200  | -3.14673500 |
| H | 3.77619600  | 1.92535000  | 0.69853900  |
| H | 6.18438100  | 1.46429000  | 0.59721500  |
| H | 7.15845000  | 0.31735800  | -1.37693500 |
| C | 1.91010600  | 1.34524900  | -1.27443700 |
| C | 1.31841000  | 2.11132400  | -0.08335500 |
| O | 1.19156700  | 1.05395000  | -2.22240400 |
| S | -0.48733700 | 1.73050100  | -0.00624000 |
| O | -0.68053100 | 0.28560000  | 0.17593300  |
| C | -1.10073400 | 2.73837500  | 1.34926000  |
| H | -1.12638900 | 3.77700300  | 1.01661200  |
| H | -2.09937400 | 2.34037500  | 1.54017700  |
| H | -0.41381600 | 2.60925500  | 2.18859600  |
| C | -1.36079900 | 2.38808400  | -1.42583900 |
| H | -2.41526200 | 2.26994500  | -1.16964500 |
| H | -1.07393100 | 3.43233200  | -1.55934900 |
| H | -1.08632800 | 1.77602900  | -2.28151800 |
| C | 1.59266500  | 3.59200500  | -0.11614000 |
| C | 1.56352900  | 4.30125500  | -1.32483400 |
| C | 1.87831400  | 4.26218100  | 1.08160600  |
| C | 1.80734500  | 5.67344700  | -1.33348100 |
| H | 1.36710400  | 3.77621800  | -2.25522300 |
| C | 2.12285700  | 5.63445300  | 1.06466100  |
| H | 1.90358800  | 3.70015200  | 2.01124700  |
| C | 2.08438300  | 6.34149000  | -0.13897500 |
| H | 1.78872800  | 6.21839200  | -2.27250800 |
| H | 2.34678100  | 6.15086400  | 1.99323600  |

|   |             |             |             |
|---|-------------|-------------|-------------|
| H | 2.27723600  | 7.41021100  | -0.14776600 |
| H | 1.62143300  | 1.68423300  | 0.88643900  |
| N | -0.35836400 | -0.11559800 | 3.46708500  |
| N | 0.47668800  | 0.69619000  | 3.23525600  |
| N | 1.30734700  | 1.50189900  | 2.99341400  |

**R-B-2**

|   |             |             |             |
|---|-------------|-------------|-------------|
| C | 2.97875400  | -1.14560400 | -2.73261900 |
| C | 1.69618000  | -1.90565200 | -3.09525300 |
| C | 0.94340300  | -0.73379900 | -2.59349000 |
| C | 2.10995500  | -0.02234800 | -2.24327100 |
| O | 4.17900100  | -1.35266700 | -2.76835700 |
| O | 1.41017300  | -3.00874600 | -3.52111600 |
| N | -0.39663700 | -0.48340000 | -2.50642100 |
| H | -0.67134400 | 0.45544400  | -2.21704300 |
| N | 2.41241400  | 1.14067500  | -1.66246200 |
| H | 1.67526600  | 1.66753100  | -1.16815500 |
| C | -1.31823200 | -1.44529500 | -2.07221900 |
| C | -2.68343200 | -1.11579100 | -2.08541200 |
| C | -0.92491500 | -2.67612300 | -1.52571700 |
| C | -3.61783600 | -1.97162200 | -1.50927200 |
| H | -2.99598300 | -0.16624800 | -2.49695500 |
| C | -1.87763900 | -3.52381600 | -0.96708100 |
| H | 0.11465100  | -2.96416800 | -1.52188800 |
| C | -3.23005200 | -3.18562800 | -0.93854100 |
| H | -3.95769400 | -3.84199100 | -0.47723600 |
| C | -1.42574800 | -4.74650200 | -0.22220400 |
| C | -5.07415000 | -1.59978000 | -1.51597500 |
| F | -5.69327400 | -2.00521400 | -0.37693900 |
| F | -5.74343500 | -2.15656900 | -2.54411700 |
| F | -5.25626800 | -0.25908300 | -1.60238300 |
| F | -2.29576100 | -5.76796600 | -0.33024700 |
| F | -1.31957500 | -4.47281500 | 1.11714900  |
| F | -0.21554700 | -5.18385400 | -0.61741700 |
| C | 3.78449200  | 1.35231500  | -1.16863200 |
| H | 4.41481500  | 0.67027900  | -1.73585300 |
| C | 4.32886800  | 2.78457700  | -1.43613800 |
| C | 5.77877700  | 2.84216400  | -0.92223200 |
| H | 6.41260800  | 2.09940800  | -1.42075200 |
| H | 6.20650100  | 3.83052900  | -1.12163000 |
| H | 5.83123800  | 2.67217200  | 0.15951400  |
| C | 3.50491200  | 3.88411600  | -0.75157700 |
| H | 3.44463000  | 3.73474200  | 0.32915300  |
| H | 3.97181300  | 4.85771600  | -0.94211300 |

|   |             |             |             |
|---|-------------|-------------|-------------|
| H | 2.48424100  | 3.91785400  | -1.13947100 |
| C | 4.32254200  | 3.00849400  | -2.95764200 |
| H | 4.92292400  | 2.25043100  | -3.47557800 |
| H | 3.30415600  | 2.96420500  | -3.35494600 |
| H | 4.73922400  | 3.99346600  | -3.19660000 |
| C | 3.78047300  | 0.93768700  | 0.31379600  |
| O | 2.93777200  | 1.38309800  | 1.09678800  |
| N | 4.68034600  | -0.00028500 | 0.71526600  |
| C | 4.58852200  | -0.52905000 | 2.08247000  |
| C | 5.80884700  | -0.58078300 | -0.04195400 |
| C | 5.95325500  | -1.22639000 | 2.26800100  |
| H | 4.45639700  | 0.30215500  | 2.78048200  |
| C | 6.27577600  | -1.73185500 | 0.85647400  |
| H | 5.49229600  | -0.92055500 | -1.02920500 |
| H | 6.69835300  | -0.48832100 | 2.58755400  |
| H | 7.33373200  | -1.96499900 | 0.71042200  |
| H | 5.69662500  | -2.63540200 | 0.63797600  |
| H | 6.60195900  | 0.16665300  | -0.16128200 |
| H | 5.91173700  | -2.01978700 | 3.01828800  |
| C | 3.42276800  | -1.49423800 | 2.25352600  |
| C | 2.99441500  | -1.82104500 | 3.54753000  |
| C | 2.79377900  | -2.10375300 | 1.16485100  |
| C | 1.96169600  | -2.73703500 | 3.75019800  |
| H | 3.47421700  | -1.34911000 | 4.40240500  |
| C | 1.76587700  | -3.02724500 | 1.36296200  |
| H | 3.10350700  | -1.85198100 | 0.15689000  |
| C | 1.34331500  | -3.34679700 | 2.65431700  |
| H | 1.64382200  | -2.97867400 | 4.76094500  |
| H | 1.30400400  | -3.51040900 | 0.50933200  |
| H | 0.54747200  | -4.07073800 | 2.79853300  |
| C | -3.06988600 | 5.38200800  | -1.91923600 |
| C | -2.64000800 | 4.08400000  | -1.67578900 |
| C | -2.25650700 | 3.69395800  | -0.38344000 |
| C | -2.32352900 | 4.62420100  | 0.66487300  |
| C | -2.75315400 | 5.92603400  | 0.41493400  |
| C | -3.12699200 | 6.30812000  | -0.87306300 |
| H | -3.36064100 | 5.67603000  | -2.92361600 |
| H | -2.58510400 | 3.35093300  | -2.47250500 |
| H | -2.02906200 | 4.35484700  | 1.67135200  |
| H | -2.79332700 | 6.64207800  | 1.23022400  |
| H | -3.46333800 | 7.32343200  | -1.06286300 |
| C | -1.82353500 | 2.28548000  | -0.20000600 |
| C | -1.64531200 | 1.80552700  | 1.24165300  |
| O | -1.92786100 | 1.44054200  | -1.09660600 |

|   |             |             |             |
|---|-------------|-------------|-------------|
| S | -0.51153400 | 0.27264800  | 1.28100300  |
| O | 0.33603300  | -0.07032700 | 0.13316200  |
| C | 0.45425300  | 0.58557400  | 2.76052200  |
| H | -0.23160500 | 0.83357500  | 3.57290800  |
| H | 1.02396400  | -0.32124700 | 2.96857100  |
| H | 1.12566600  | 1.41553700  | 2.52037500  |
| C | -1.55054600 | -1.14363200 | 1.68844300  |
| H | -0.86078900 | -1.98553300 | 1.76609200  |
| H | -2.08869100 | -0.96751000 | 2.61878400  |
| H | -2.24189200 | -1.28815200 | 0.85796300  |
| C | -2.94487100 | 1.47074700  | 1.91833500  |
| C | -3.99125600 | 0.86885200  | 1.20508400  |
| C | -3.09800600 | 1.72519400  | 3.28768900  |
| C | -5.16258200 | 0.49982000  | 1.86037500  |
| H | -3.88489900 | 0.69279000  | 0.14209200  |
| C | -4.27498600 | 1.36091400  | 3.94069500  |
| H | -2.30019500 | 2.22072900  | 3.83602300  |
| C | -5.30389200 | 0.73930700  | 3.22940200  |
| H | -5.95500400 | 0.01788800  | 1.29767000  |
| H | -4.38981000 | 1.56508800  | 5.00098600  |
| H | -6.21753800 | 0.45022800  | 3.74024100  |
| H | -1.06597100 | 2.50859000  | 1.84885900  |
| N | 0.43661800  | 2.88488700  | -0.28539600 |
| N | 0.64538500  | 3.39855900  | 0.77215000  |
| N | 0.75511100  | 3.86964900  | 1.84120900  |

#### R-TS2

|   |             |             |             |
|---|-------------|-------------|-------------|
| C | 0.27098700  | 3.06146100  | -1.99467500 |
| C | 1.64915100  | 2.43655600  | -2.16883300 |
| C | 0.96341700  | 1.10645800  | -2.23841900 |
| C | -0.29924700 | 1.69405900  | -1.99352100 |
| O | -0.17303000 | 4.19368300  | -1.86521500 |
| O | 2.79351000  | 2.85289000  | -2.15095500 |
| N | 1.32737800  | -0.18072300 | -2.42629200 |
| H | 0.57915000  | -0.86046800 | -2.63389000 |
| N | -1.54658900 | 1.25377700  | -1.75268300 |
| H | -1.67648500 | 0.25681000  | -1.57364300 |
| C | 2.57296200  | -0.75631300 | -2.14676400 |
| C | 3.66047600  | -0.01722200 | -1.66418900 |
| C | 2.68669700  | -2.14976200 | -2.26849000 |
| C | 4.81545500  | -0.68302600 | -1.26141600 |
| H | 3.61226900  | 1.06355600  | -1.60420800 |
| C | 3.85298400  | -2.78879500 | -1.86614000 |
| H | 1.85794400  | -2.72594500 | -2.65741500 |

|   |             |             |             |
|---|-------------|-------------|-------------|
| C | 4.92933800  | -2.06857400 | -1.34705700 |
| H | 5.83069200  | -2.57389000 | -1.02399000 |
| C | 3.92132100  | -4.29066200 | -1.90038200 |
| C | 5.89686400  | 0.11380700  | -0.58935800 |
| F | 7.10082400  | -0.49016800 | -0.65977800 |
| F | 5.62338000  | 0.27284000  | 0.74299400  |
| F | 6.02268400  | 1.35145900  | -1.10029500 |
| F | 3.10453200  | -4.81872800 | -2.83151800 |
| F | 3.56244000  | -4.82993700 | -0.70681600 |
| F | 5.17530300  | -4.72722100 | -2.15659400 |
| C | -2.46538400 | 2.17123300  | -1.05458900 |
| H | -2.21004800 | 3.16656500  | -1.41518100 |
| C | -3.95893500 | 1.93619800  | -1.41267900 |
| C | -4.77472400 | 3.10462300  | -0.83161100 |
| H | -4.44972200 | 4.06685700  | -1.24322500 |
| H | -5.83564700 | 2.97863100  | -1.07292200 |
| H | -4.68929600 | 3.14973200  | 0.26095200  |
| C | -4.52045200 | 0.61877700  | -0.85721100 |
| H | -4.58751000 | 0.65144100  | 0.23415700  |
| H | -5.53247100 | 0.46030200  | -1.24711200 |
| H | -3.90920900 | -0.24142900 | -1.13609300 |
| C | -4.08308500 | 1.94322600  | -2.94584100 |
| H | -3.66247000 | 2.86067600  | -3.37379100 |
| H | -3.55672500 | 1.09442400  | -3.39094700 |
| H | -5.13813200 | 1.88531100  | -3.23607100 |
| C | -2.11337300 | 2.07428600  | 0.44578800  |
| O | -2.02196400 | 0.96031000  | 0.99347200  |
| N | -1.78545000 | 3.20198300  | 1.11010600  |
| C | -1.15613700 | 3.10491900  | 2.44311500  |
| C | -2.00164500 | 4.60464200  | 0.68717500  |
| C | -1.36538900 | 4.52274400  | 3.01413700  |
| H | -1.68723300 | 2.35422000  | 3.03306100  |
| C | -1.29238200 | 5.42339100  | 1.77412500  |
| H | -1.58378500 | 4.78012200  | -0.30491800 |
| H | -2.35970900 | 4.58630900  | 3.47241100  |
| H | -1.76684600 | 6.39670200  | 1.92373400  |
| H | -0.25006800 | 5.59908300  | 1.49317400  |
| H | -3.07517200 | 4.81948200  | 0.67202300  |
| H | -0.62051200 | 4.76877000  | 3.77434800  |
| C | 0.31367400  | 2.71491300  | 2.35306400  |
| C | 0.89672800  | 1.97131200  | 3.38523600  |
| C | 1.12608900  | 3.14470000  | 1.29599600  |
| C | 2.26025900  | 1.67311300  | 3.36987800  |
| H | 0.27757600  | 1.62687800  | 4.21151500  |



|   |             |             |             |
|---|-------------|-------------|-------------|
| C | 2.49066500  | 2.84898900  | 1.27691100  |
| H | 0.69986000  | 3.70999500  | 0.47598500  |
| C | 3.06369200  | 2.11412400  | 2.31658200  |
| H | 2.69236000  | 1.08531400  | 4.17492800  |
| H | 3.09244700  | 3.17786800  | 0.43517000  |
| H | 4.11859700  | 1.85989900  | 2.28299400  |
| C | -4.99657000 | -5.17164500 | -0.22237700 |
| C | -3.81733700 | -4.48803500 | 0.07176400  |
| C | -3.38733400 | -3.43604400 | -0.75130800 |
| C | -4.15009200 | -3.09340800 | -1.87853000 |
| C | -5.31544500 | -3.78985100 | -2.17814400 |
| C | -5.74630500 | -4.82785500 | -1.34750000 |
| H | -5.32370700 | -5.97814300 | 0.42708300  |
| H | -3.25513400 | -4.77975100 | 0.95298000  |
| H | -3.79539100 | -2.29230700 | -2.51669200 |
| H | -5.88942800 | -3.52523500 | -3.06142000 |
| H | -6.65984200 | -5.36803200 | -1.57842300 |
| C | -2.17313600 | -2.61537400 | -0.47941300 |
| C | -1.22518000 | -3.05071300 | 0.61018100  |
| O | -2.03902800 | -1.50634300 | -1.01170000 |
| S | -2.16803900 | -2.46548000 | 2.39470600  |
| O | -2.45111900 | -3.62874400 | 3.28177400  |
| C | -1.14995700 | -1.22940400 | 3.23490800  |
| H | -1.14622300 | -0.31473900 | 2.63675900  |
| H | -1.61889500 | -1.07880100 | 4.21113500  |
| H | -0.14414600 | -1.63616400 | 3.34207400  |
| C | -3.65006900 | -1.50362300 | 2.03247700  |
| H | -4.08581800 | -1.21214200 | 2.99148700  |
| H | -3.33425400 | -0.63471300 | 1.44871200  |
| H | -4.33194100 | -2.14386300 | 1.47262700  |
| C | 0.13899500  | -2.50032500 | 0.73668700  |
| C | 1.16336100  | -3.36298500 | 1.15979800  |
| C | 0.41177600  | -1.13421200 | 0.57037700  |
| C | 2.43731700  | -2.86594100 | 1.42140200  |
| H | 0.95994500  | -4.42482100 | 1.26138200  |
| C | 1.68103500  | -0.64426600 | 0.85076600  |
| H | -0.37780000 | -0.45912600 | 0.27496500  |
| C | 2.69402200  | -1.50092000 | 1.28245600  |
| H | 3.22893200  | -3.54520000 | 1.71913500  |
| H | 1.87720600  | 0.41294500  | 0.73481000  |
| H | 3.68364600  | -1.10516000 | 1.48094900  |
| H | -1.27842400 | -4.11363800 | 0.82999500  |
| N | -0.54727400 | -2.27249200 | -3.18727300 |
| N | -0.61284700 | -3.19210500 | -2.45528900 |

N -0.73946000 -4.06748100 -1.66285400

**R-TS2-1**

C -0.02041100 3.09234600 -2.43845700  
C 1.41521000 2.58190900 -2.42060900  
C 0.85149300 1.20159900 -2.27960400  
C -0.47069000 1.69810700 -2.21743500  
O -0.56707800 4.18159900 -2.53872200  
O 2.51559700 3.10399500 -2.41972500  
N 1.33269900 -0.05878200 -2.19714800  
H 0.65813000 -0.82937100 -2.32451900  
N -1.68818100 1.18744200 -1.96439100  
H -1.74129000 0.23006700 -1.61298000  
C 2.58437900 -0.45278300 -1.70740100  
C 3.59087400 0.46113900 -1.37128000  
C 2.77413300 -1.81727500 -1.43928100  
C 4.73973300 0.00537300 -0.72845900  
H 3.47770400 1.51622300 -1.59327300  
C 3.92791100 -2.24432500 -0.79572000  
H 1.99708000 -2.52937800 -1.67711800  
C 4.92571500 -1.34138500 -0.42773300  
H 5.80753500 -1.67531100 0.10459600  
C 4.09260900 -3.69894300 -0.45153000  
C 5.71224200 1.01926300 -0.19786500  
F 6.95933700 0.51961900 -0.07332800  
F 5.33843200 1.43433600 1.05232300  
F 5.78192500 2.12374600 -0.96128300  
F 2.91425800 -4.35028100 -0.41269200  
F 4.67592400 -3.84796300 0.76631500  
F 4.88239100 -4.34384100 -1.33895100  
C -2.72794900 2.11821500 -1.48977200  
H -2.53744900 3.05556500 -2.01043700  
C -4.16776300 1.67851900 -1.87412300  
C -5.12058900 2.84384100 -1.55396700  
H -4.85557000 3.74672000 -2.11567500  
H -6.14782300 2.57324700 -1.82089100  
H -5.11212800 3.08733800 -0.48453000  
C -4.64633200 0.42903700 -1.11960200  
H -4.78815100 0.64480300 -0.05658600  
H -5.61219500 0.10576500 -1.52446100  
H -3.94416500 -0.40192400 -1.20828500  
C -4.18945100 1.40611900 -3.38784900  
H -3.82400500 2.27209900 -3.95202500  
H -3.56150600 0.54910800 -3.64645100

|   |             |             |             |
|---|-------------|-------------|-------------|
| H | -5.21353400 | 1.19462900  | -3.71530400 |
| C | -2.47042200 | 2.31939100  | 0.01969000  |
| O | -2.31804800 | 1.33300400  | 0.76318500  |
| N | -2.29037500 | 3.57285000  | 0.48576800  |
| C | -1.75182800 | 3.77320800  | 1.84649500  |
| C | -2.59629600 | 4.85174600  | -0.19543200 |
| C | -2.12571600 | 5.24110400  | 2.13928600  |
| H | -2.25508500 | 3.08783200  | 2.53256900  |
| C | -2.04016500 | 5.91341200  | 0.76289500  |
| H | -2.12525900 | 4.89106300  | -1.17842300 |
| H | -3.15293400 | 5.28488000  | 2.52095800  |
| H | -2.60542800 | 6.84729300  | 0.70665500  |
| H | -0.99886400 | 6.13685400  | 0.51370700  |
| H | -3.68051200 | 4.95456700  | -0.30840000 |
| H | -1.46324800 | 5.68871300  | 2.88364300  |
| C | -0.25032300 | 3.52394800  | 1.90870700  |
| C | 0.32426400  | 3.05345500  | 3.09478000  |
| C | 0.59126700  | 3.82735600  | 0.83100900  |
| C | 1.70722400  | 2.90228000  | 3.20824600  |
| H | -0.31722600 | 2.80903600  | 3.93947600  |
| C | 1.97522800  | 3.67647500  | 0.93978000  |
| H | 0.17289300  | 4.18099500  | -0.10364700 |
| C | 2.53881800  | 3.21689800  | 2.13162600  |
| H | 2.13395700  | 2.52661100  | 4.13406000  |
| H | 2.60203600  | 3.89949700  | 0.08172900  |
| H | 3.61244300  | 3.07343200  | 2.20284800  |
| C | -4.92288100 | -4.19705500 | -1.69184400 |
| C | -3.85258200 | -3.34396100 | -1.44763900 |
| C | -3.15072100 | -3.41403900 | -0.23412100 |
| C | -3.54539400 | -4.35274400 | 0.73133900  |
| C | -4.63142800 | -5.19326800 | 0.48954700  |
| C | -5.32028800 | -5.12081300 | -0.72141200 |
| H | -5.44860900 | -4.14390200 | -2.64075800 |
| H | -3.52375400 | -2.62880400 | -2.19278100 |
| H | -3.02874200 | -4.43424500 | 1.68224900  |
| H | -4.93303400 | -5.90940800 | 1.24812400  |
| H | -6.16036700 | -5.78292200 | -0.90994000 |
| C | -2.04007400 | -2.43953100 | -0.03710200 |
| C | -1.14223100 | -2.58830300 | 1.16539300  |
| O | -1.97211300 | -1.42302400 | -0.73981800 |
| S | -2.26632700 | -1.80454500 | 2.75396700  |
| O | -2.51486700 | -2.81863600 | 3.81662600  |
| C | -1.42955700 | -0.34549400 | 3.41878100  |
| H | -1.45996100 | 0.44777500  | 2.66760000  |

|   |             |             |             |
|---|-------------|-------------|-------------|
| H | -1.98560100 | -0.07655700 | 4.32104500  |
| H | -0.40339500 | -0.62396800 | 3.65961200  |
| C | -3.79288900 | -1.07199500 | 2.13303900  |
| H | -4.32569800 | -0.66313000 | 2.99528200  |
| H | -3.50829900 | -0.29078000 | 1.42285900  |
| H | -4.37091500 | -1.86380300 | 1.65643700  |
| C | 0.15539900  | -1.89234700 | 1.27972200  |
| C | 1.20740400  | -2.55994400 | 1.92955500  |
| C | 0.32435600  | -0.55647400 | 0.88735400  |
| C | 2.40253400  | -1.89749400 | 2.19563800  |
| H | 1.08747600  | -3.60295900 | 2.20698800  |
| C | 1.51587100  | 0.10145100  | 1.16914600  |
| H | -0.48932000 | -0.02729100 | 0.41350600  |
| C | 2.55204200  | -0.55759900 | 1.83000500  |
| H | 3.22065900  | -2.43160400 | 2.66745800  |
| H | 1.63145300  | 1.13550500  | 0.87450000  |
| H | 3.48104000  | -0.03417300 | 2.02719200  |
| H | -1.11813700 | -3.59979600 | 1.56248700  |
| N | -0.33380400 | -2.39504900 | -2.70384600 |
| N | -0.33767300 | -3.17757600 | -1.82425800 |
| N | -0.40604400 | -3.90833300 | -0.89029300 |

#### R-TS2-2

|   |             |             |             |
|---|-------------|-------------|-------------|
| C | -0.02238300 | 3.09195000  | -2.43868900 |
| C | 1.41358600  | 2.58249500  | -2.42068500 |
| C | 0.85080200  | 1.20179900  | -2.27962100 |
| C | -0.47172800 | 1.69741700  | -2.21767600 |
| O | -0.56979200 | 4.18083200  | -2.53895400 |
| O | 2.51361700  | 3.10532500  | -2.41977300 |
| N | 1.33292600  | -0.05821500 | -2.19694300 |
| H | 0.65895200  | -0.82935000 | -2.32403200 |
| N | -1.68893400 | 1.18593900  | -1.96486600 |
| H | -1.74140500 | 0.22862800  | -1.61320500 |
| C | 2.58495800  | -0.45125000 | -1.70726000 |
| C | 3.59065600  | 0.46339400  | -1.37074900 |
| C | 2.77587100  | -1.81568100 | -1.43964400 |
| C | 4.73984800  | 0.00835400  | -0.72798000 |
| H | 3.47666800  | 1.51844900  | -1.59245100 |
| C | 3.92988600  | -2.24199400 | -0.79604100 |
| H | 1.99951900  | -2.52831100 | -1.67816100 |
| C | 4.92688100  | -1.33833500 | -0.42760800 |
| H | 5.80890000  | -1.67170000 | 0.10473900  |
| C | 4.09575500  | -3.69660700 | -0.45236900 |
| C | 5.71153400  | 1.02289900  | -0.19711800 |

|   |             |             |             |
|---|-------------|-------------|-------------|
| F | 6.95889100  | 0.52406400  | -0.07202000 |
| F | 5.33697900  | 1.43791100  | 1.05287700  |
| F | 5.78083700  | 2.12733100  | -0.96064800 |
| F | 2.91794700  | -4.34897300 | -0.41423200 |
| F | 4.67868200  | -3.84550000 | 0.76567800  |
| F | 4.88645100  | -4.34056700 | -1.33964800 |
| C | -2.72938300 | 2.11602600  | -1.49042500 |
| H | -2.53959400 | 3.05342400  | -2.01126000 |
| C | -4.16885900 | 1.67508200  | -1.87467400 |
| C | -5.12266900 | 2.83965200  | -1.55473100 |
| H | -4.85819500 | 3.74275100  | -2.11633800 |
| H | -6.14962300 | 2.56827900  | -1.82193900 |
| H | -5.11467200 | 3.08313200  | -0.48528500 |
| C | -4.64623200 | 0.42535900  | -1.11980900 |
| H | -4.78705800 | 0.64104600  | -0.05665600 |
| H | -5.61234200 | 0.10165600  | -1.52372000 |
| H | -3.94370400 | -0.40523100 | -1.20918200 |
| C | -4.19038700 | 1.40233200  | -3.38833300 |
| H | -3.82636600 | 2.26876100  | -3.95274400 |
| H | -3.56118100 | 0.54623100  | -3.64686800 |
| H | -5.21420300 | 1.18921600  | -3.71556900 |
| C | -2.47199700 | 2.31764700  | 0.01900000  |
| O | -2.31860700 | 1.33150500  | 0.76262400  |
| N | -2.29321400 | 3.57132500  | 0.48494900  |
| C | -1.75507600 | 3.77228900  | 1.84576100  |
| C | -2.60030800 | 4.84987200  | -0.19635700 |
| C | -2.12984700 | 5.24005300  | 2.13814600  |
| H | -2.25809800 | 3.08677500  | 2.53187600  |
| C | -2.04449300 | 5.91202400  | 0.76158200  |
| H | -2.12974400 | 4.88934200  | -1.17956400 |
| H | -3.15714600 | 5.28334000  | 2.51965800  |
| H | -2.60997900 | 6.84574900  | 0.70502700  |
| H | -1.00323800 | 6.13561400  | 0.51233100  |
| H | -3.68465600 | 4.95194600  | -0.30880400 |
| H | -1.46773800 | 5.68822900  | 2.88248100  |
| C | -0.25344700 | 3.52389200  | 1.90834900  |
| C | 0.32116100  | 3.05404600  | 3.09466800  |
| C | 0.58819700  | 3.82758100  | 0.83077500  |
| C | 1.70419200  | 2.90380000  | 3.20850000  |
| H | -0.32037100 | 2.80942400  | 3.93927400  |
| C | 1.97223100  | 3.67765800  | 0.93992200  |
| H | 0.16980400  | 4.18072400  | -0.10405800 |
| C | 2.53583500  | 3.21874300  | 2.13201500  |
| H | 2.13095400  | 2.52863000  | 4.13450400  |

|            |             |             |             |
|------------|-------------|-------------|-------------|
| H          | 2.59910600  | 3.90092800  | 0.08198400  |
| H          | 3.60954100  | 3.07605600  | 2.20354700  |
| C          | -4.92035600 | -4.19912800 | -1.69171100 |
| C          | -3.85022900 | -3.34580000 | -1.44757100 |
| C          | -3.14882600 | -3.41512300 | -0.23375100 |
| C          | -3.54375200 | -4.35335400 | 0.73206900  |
| C          | -4.62959300 | -5.19413900 | 0.49032200  |
| C          | -5.31801900 | -5.12240800 | -0.72093000 |
| H          | -5.44573000 | -4.14654800 | -2.64085300 |
| H          | -3.52115500 | -2.63103000 | -2.19297300 |
| H          | -3.02742600 | -4.43430400 | 1.68320800  |
| H          | -4.93138800 | -5.90992000 | 1.24916300  |
| H          | -6.15794900 | -5.78471800 | -0.90941600 |
| C          | -2.03828500 | -2.44047600 | -0.03686500 |
| C          | -1.14063700 | -2.58874300 | 1.16589800  |
| O          | -1.96998400 | -1.42444100 | -0.74020500 |
| S          | -2.26484600 | -1.80509300 | 2.75434800  |
| O          | -2.51259900 | -2.81915100 | 3.81722200  |
| C          | -1.42869100 | -0.34549400 | 3.41873400  |
| H          | -1.45935600 | 0.44755000  | 2.66732800  |
| H          | -1.98484500 | -0.07650800 | 4.32091500  |
| H          | -0.40242300 | -0.62349900 | 3.65965800  |
| C          | -3.79202600 | -1.07352800 | 2.13379000  |
| H          | -4.32514000 | -0.66558100 | 2.99628200  |
| H          | -3.50818800 | -0.29170300 | 1.42398700  |
| H          | -4.36941300 | -1.86558800 | 1.65683400  |
| C          | 0.15676500  | -1.89225600 | 1.27993500  |
| C          | 1.20908300  | -2.55915200 | 1.92997100  |
| C          | 0.32505000  | -0.55637100 | 0.88729400  |
| C          | 2.40382400  | -1.89598000 | 2.19604400  |
| H          | 1.08970200  | -3.60218000 | 2.20758900  |
| C          | 1.51613900  | 0.10229500  | 1.16914300  |
| H          | -0.48881900 | -0.02778000 | 0.41311700  |
| C          | 2.55259800  | -0.55604900 | 1.83025100  |
| H          | 3.22220900  | -2.42953500 | 2.66803800  |
| H          | 1.63115400  | 1.13637400  | 0.87435800  |
| H          | 3.48124200  | -0.03203400 | 2.02753000  |
| H          | -1.11620200 | -3.60016800 | 1.56314000  |
| N          | -0.33015500 | -2.39746700 | -2.70283200 |
| N          | -0.33488000 | -3.17952000 | -1.82283700 |
| N          | -0.40400500 | -3.90988600 | -0.88859400 |
| <b>S-C</b> |             |             |             |
| C          | 0.67003600  | -2.54502000 | -2.82395800 |

|   |             |             |             |
|---|-------------|-------------|-------------|
| C | -0.84425600 | -2.31840200 | -2.73395300 |
| C | -0.53086600 | -0.93920700 | -2.23444800 |
| C | 0.85282300  | -1.17006800 | -2.30630800 |
| O | 1.41221100  | -3.46490900 | -3.12956200 |
| O | -1.84297100 | -2.98582800 | -2.90772500 |
| N | -1.24443700 | 0.13652000  | -1.84091800 |
| H | -0.70966000 | 0.96964400  | -1.58684700 |
| N | 1.96170600  | -0.47156300 | -1.98068800 |
| H | 1.80356600  | 0.39849000  | -1.47960800 |
| C | -2.57637700 | 0.12048800  | -1.39249000 |
| C | -3.20769500 | -1.06087000 | -0.98425800 |
| C | -3.24879500 | 1.33852300  | -1.27494800 |
| C | -4.49445600 | -1.00708000 | -0.46498100 |
| H | -2.69938100 | -2.00851000 | -1.05997500 |
| C | -4.53411500 | 1.37397500  | -0.73666200 |
| H | -2.76711100 | 2.25630700  | -1.59060300 |
| C | -5.17149700 | 0.20585100  | -0.32804400 |
| H | -6.17007100 | 0.23882000  | 0.08918400  |
| C | -5.19312900 | 2.70850400  | -0.52423000 |
| C | -5.11457600 | -2.25901500 | 0.08716700  |
| F | -6.44214700 | -2.31256900 | -0.14249900 |
| F | -4.95552600 | -2.32862200 | 1.44087800  |
| F | -4.56034000 | -3.37974400 | -0.41937000 |
| F | -4.70744400 | 3.32481300  | 0.58474800  |
| F | -6.52753800 | 2.59431400  | -0.35423400 |
| F | -4.98154200 | 3.54646100  | -1.55880600 |
| C | 3.15031400  | -1.23519300 | -1.56425800 |
| H | 3.24455400  | -2.05610100 | -2.27439400 |
| C | 4.44268800  | -0.37649700 | -1.64648800 |
| C | 5.60139000  | -1.16368000 | -1.01217300 |
| H | 5.74323900  | -2.13375900 | -1.50198800 |
| H | 6.53590900  | -0.60192800 | -1.11506900 |
| H | 5.43519600  | -1.33947800 | 0.05672300  |
| C | 4.27652000  | 0.96904500  | -0.92321800 |
| H | 3.91004800  | 0.83835000  | 0.09597300  |
| H | 5.23510800  | 1.49839900  | -0.88827800 |
| H | 3.57807000  | 1.62043600  | -1.45295700 |
| C | 4.74927100  | -0.11923000 | -3.13116200 |
| H | 4.95139000  | -1.05604600 | -3.66369900 |
| H | 3.90516900  | 0.37473100  | -3.62220700 |
| H | 5.62989700  | 0.52512500  | -3.23230500 |
| C | 2.86060200  | -1.79593500 | -0.15728400 |
| O | 2.47282700  | -1.03484600 | 0.74255200  |
| N | 2.95744500  | -3.12786600 | 0.04438700  |

|   |             |             |             |
|---|-------------|-------------|-------------|
| C | 2.49114600  | -3.70186900 | 1.32302300  |
| C | 3.53453600  | -4.14633300 | -0.85930200 |
| C | 3.12758500  | -5.10818800 | 1.31165000  |
| H | 2.88002900  | -3.09696900 | 2.14630700  |
| C | 3.17232700  | -5.47149200 | -0.17797100 |
| H | 3.10888900  | -4.06549500 | -1.86009000 |
| H | 4.14432300  | -5.05132000 | 1.71872800  |
| H | 3.89469100  | -6.25934900 | -0.40693100 |
| H | 2.18835900  | -5.80891600 | -0.51725100 |
| H | 4.62226200  | -4.01819800 | -0.91302200 |
| H | 2.55605900  | -5.81663100 | 1.91552300  |
| C | 0.97274700  | -3.73527900 | 1.42046200  |
| C | 0.36176300  | -3.61974100 | 2.67394300  |
| C | 0.16421400  | -3.93600200 | 0.29496500  |
| C | -1.02543200 | -3.70292100 | 2.80248100  |
| H | 0.97687200  | -3.45309400 | 3.55565200  |
| C | -1.22408300 | -4.01652000 | 0.41943100  |
| H | 0.61441100  | -4.02519700 | -0.68685400 |
| C | -1.82465000 | -3.89909500 | 1.67435200  |
| H | -1.48256100 | -3.59659700 | 3.78218900  |
| H | -1.83175000 | -4.16710300 | -0.46764900 |
| H | -2.90496600 | -3.93977600 | 1.76546700  |
| C | 3.84415800  | 4.84929800  | -1.95498400 |
| C | 2.70319200  | 4.08816600  | -1.73783800 |
| C | 2.25959600  | 3.83044600  | -0.42825600 |
| C | 2.97855300  | 4.34275100  | 0.66390600  |
| C | 4.13575300  | 5.08657200  | 0.43713200  |
| C | 4.56606000  | 5.34584600  | -0.86460300 |
| H | 4.17465600  | 5.05573400  | -2.96855600 |
| H | 2.13476900  | 3.68425000  | -2.56878600 |
| H | 2.68139600  | 4.12434900  | 1.68494300  |
| H | 4.70001600  | 5.46517900  | 1.28402800  |
| H | 5.46273500  | 5.93583800  | -1.03253700 |
| C | 1.05586400  | 2.98573300  | -0.26644200 |
| C | 0.18523700  | 3.16411400  | 0.98818900  |
| O | 0.68789100  | 2.24544700  | -1.18336300 |
| S | 2.62668300  | 1.40350600  | 2.65939400  |
| O | 2.49443500  | 2.72663900  | 3.41024400  |
| C | 1.82277900  | 0.11585200  | 3.67312300  |
| H | 1.89974100  | -0.83026200 | 3.13413800  |
| H | 2.29497900  | 0.07600000  | 4.65840500  |
| H | 0.77363700  | 0.39955700  | 3.76357100  |
| C | 4.34041300  | 0.81078100  | 2.89092200  |
| H | 4.58764700  | 0.81660700  | 3.95603000  |



|   |             |             |             |
|---|-------------|-------------|-------------|
| H | 4.41564700  | -0.19272700 | 2.46569400  |
| H | 4.99620200  | 1.49717600  | 2.35085600  |
| C | -0.71949000 | 1.98828500  | 1.30505300  |
| C | -1.99773100 | 2.19303900  | 1.83262800  |
| C | -0.24767900 | 0.67772000  | 1.15698600  |
| C | -2.79112400 | 1.10623600  | 2.20280900  |
| H | -2.37999000 | 3.20026400  | 1.95196800  |
| C | -1.03787700 | -0.40440800 | 1.53259900  |
| H | 0.73914200  | 0.48102100  | 0.75902500  |
| C | -2.31354600 | -0.19518500 | 2.05770600  |
| H | -3.79003700 | 1.28459800  | 2.58852900  |
| H | -0.65393400 | -1.40730300 | 1.39848100  |
| H | -2.93958600 | -1.04132000 | 2.31826700  |
| H | 0.81616700  | 3.37380200  | 1.85498500  |
| N | -2.07810800 | 4.59482400  | -1.03808000 |
| N | -1.32601000 | 4.45415700  | -0.19237300 |
| N | -0.54061100 | 4.45070500  | 0.76615800  |

## VII. Determination of the Product Stereochemistry

The absolute stereochemistry of the product derivative **8** was determined by X-ray crystallography. The X-ray data have been deposited at the Cambridge Crystallographic Data Center (CCDC 2149693). The stereochemistry of other products was assumed by analogy.

The single crystal of compound **8** was obtained by slow evaporation of its solution in *n*-hexane/Et<sub>2</sub>O (5:1) at 0 °C.

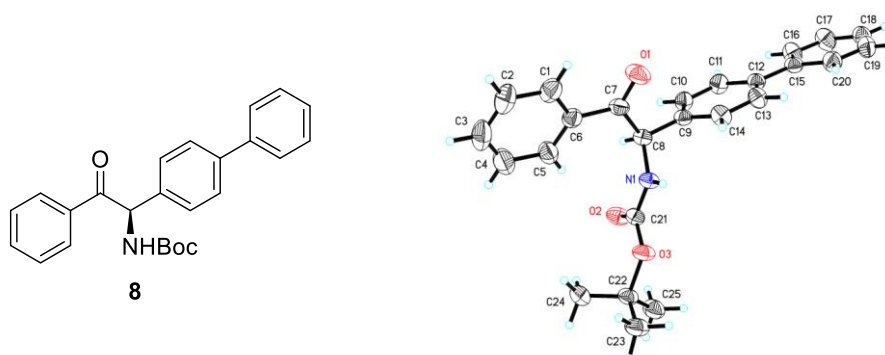

**Table S4.** Crystal data and structure refinement for **8**.

|                                 |                                                  |                    |
|---------------------------------|--------------------------------------------------|--------------------|
| Identification code             | <b>8</b>                                         |                    |
| Empirical formula               | C <sub>25</sub> H <sub>25</sub> N O <sub>3</sub> |                    |
| Formula weight                  | 387.46                                           |                    |
| Temperature                     | 293(2) K                                         |                    |
| Wavelength                      | 1.54178 Å                                        |                    |
| Crystal system                  | Monoclinic                                       |                    |
| Space group                     | P 21                                             |                    |
| Unit cell dimensions            | a = 10.5777(2) Å                                 | α = 90°.           |
|                                 | b = 41.8595(7) Å                                 | β = 115.1980(10)°. |
|                                 | c = 10.6059(2) Å                                 | γ = 90°.           |
| Volume                          | 4249.18(14) Å <sup>3</sup>                       |                    |
| Z                               | 8                                                |                    |
| Density (calculated)            | 1.211 Mg/m <sup>3</sup>                          |                    |
| Absorption coefficient          | 0.630 mm <sup>-1</sup>                           |                    |
| F(000)                          | 1648                                             |                    |
| Crystal size                    | 0.200 x 0.160 x 0.130 mm <sup>3</sup>            |                    |
| Theta range for data collection | 4.607 to 67.496°.                                |                    |

|                                   |                                             |
|-----------------------------------|---------------------------------------------|
| Index ranges                      | -12<=h<=12, -50<=k<=50, -11<=l<=12          |
| Reflections collected             | 39522                                       |
| Independent reflections           | 14813 [R(int) = 0.0304]                     |
| Completeness to theta = 67.679°   | 97.8 %                                      |
| Absorption correction             | Semi-empirical from equivalents             |
| Max. and min. transmission        | 0.7456 and 0.5692                           |
| Refinement method                 | Full-matrix least-squares on F <sup>2</sup> |
| Data / restraints / parameters    | 14813 / 1 / 1073                            |
| Goodness-of-fit on F <sup>2</sup> | 1.020                                       |
| Final R indices [I>2sigma(I)]     | R1 = 0.0386, wR2 = 0.1030                   |
| R indices (all data)              | R1 = 0.0425, wR2 = 0.1071                   |
| Absolute structure parameter      | 0.05(5)                                     |
| Extinction coefficient            | n/a                                         |
| Largest diff. peak and hole       | 0.132 and -0.106 e.Å <sup>-3</sup>          |

**Table S5.** Atomic coordinates ( x 10<sup>4</sup>) and equivalent isotropic displacement parameters (Å<sup>2</sup>x 10<sup>3</sup>) for **8**. U(eq) is defined as one third of the trace of the orthogonalized U<sup>ij</sup> tensor.

|       | x       | y       | z        | U(eq) |
|-------|---------|---------|----------|-------|
| N(1)  | 2573(2) | 3680(1) | 6422(2)  | 54(1) |
| N(1A) | 2477(2) | 3699(1) | 1371(2)  | 54(1) |
| N(1B) | 3264(2) | 6767(1) | 2562(2)  | 60(1) |
| N(1C) | 3458(2) | 6794(1) | 7582(2)  | 57(1) |
| O(1)  | 5517(3) | 3490(1) | 6226(3)  | 94(1) |
| O(2)  | 2027(2) | 3691(1) | 8270(2)  | 69(1) |
| O(3)  | 378(2)  | 3629(1) | 6049(2)  | 66(1) |
| O(1A) | 5419(3) | 3526(1) | 1157(3)  | 93(1) |
| O(2A) | 1931(2) | 3703(1) | 3218(2)  | 68(1) |
| O(3A) | 284(2)  | 3648(1) | 996(2)   | 63(1) |
| O(1B) | 5409(2) | 6760(1) | 5046(2)  | 85(1) |
| O(2B) | 2587(2) | 6790(1) | 237(2)   | 72(1) |
| O(3B) | 1603(2) | 7103(1) | 1322(2)  | 69(1) |
| O(1C) | 5472(2) | 6760(1) | 10119(2) | 88(1) |
| O(2C) | 2641(2) | 6781(1) | 5236(2)  | 72(1) |
| O(3C) | 1722(2) | 7112(1) | 6323(2)  | 68(1) |
| C(1)  | 5083(4) | 2853(1) | 6586(4)  | 80(1) |

|        |          |         |         |        |
|--------|----------|---------|---------|--------|
| C(2)   | 4878(5)  | 2538(1) | 6803(5) | 103(1) |
| C(3)   | 4135(5)  | 2456(1) | 7542(5) | 101(1) |
| C(4)   | 3582(4)  | 2692(1) | 8064(4) | 96(1)  |
| C(5)   | 3781(3)  | 3012(1) | 7847(3) | 74(1)  |
| C(6)   | 4530(3)  | 3095(1) | 7103(3) | 62(1)  |
| C(7)   | 4788(2)  | 3432(1) | 6811(3) | 58(1)  |
| C(8)   | 4079(2)  | 3709(1) | 7236(3) | 52(1)  |
| C(9)   | 4647(2)  | 4029(1) | 7078(2) | 51(1)  |
| C(10)  | 5548(3)  | 4198(1) | 8239(3) | 61(1)  |
| C(11)  | 6076(3)  | 4491(1) | 8097(3) | 66(1)  |
| C(12)  | 5718(2)  | 4632(1) | 6798(3) | 55(1)  |
| C(13)  | 4806(3)  | 4462(1) | 5645(3) | 64(1)  |
| C(14)  | 4286(3)  | 4166(1) | 5779(3) | 64(1)  |
| C(15)  | 6235(2)  | 4955(1) | 6643(3) | 58(1)  |
| C(16)  | 7057(3)  | 5136(1) | 7789(3) | 76(1)  |
| C(17)  | 7514(4)  | 5438(1) | 7636(4) | 86(1)  |
| C(18)  | 7173(3)  | 5567(1) | 6356(4) | 76(1)  |
| C(19)  | 6351(4)  | 5392(1) | 5199(4) | 82(1)  |
| C(20)  | 5890(3)  | 5089(1) | 5340(3) | 74(1)  |
| C(21)  | 1682(2)  | 3670(1) | 7027(3) | 53(1)  |
| C(22)  | -813(2)  | 3577(1) | 6409(3) | 59(1)  |
| C(23)  | -1967(3) | 3476(1) | 5014(3) | 75(1)  |
| C(24)  | -508(3)  | 3307(1) | 7439(3) | 69(1)  |
| C(25)  | -1152(4) | 3884(1) | 6931(4) | 81(1)  |
| C(1A)  | 5055(4)  | 2886(1) | 1554(4) | 84(1)  |
| C(2A)  | 4879(5)  | 2570(1) | 1785(5) | 109(1) |
| C(3A)  | 4149(5)  | 2486(1) | 2535(5) | 108(1) |
| C(4A)  | 3591(4)  | 2718(1) | 3058(4) | 98(1)  |
| C(5A)  | 3754(3)  | 3038(1) | 2829(3) | 76(1)  |
| C(6A)  | 4489(3)  | 3126(1) | 2067(3) | 64(1)  |
| C(7A)  | 4708(2)  | 3464(1) | 1758(3) | 59(1)  |
| C(8A)  | 3980(2)  | 3735(1) | 2183(3) | 55(1)  |
| C(9A)  | 4534(2)  | 4059(1) | 2028(3) | 54(1)  |
| C(10A) | 5722(3)  | 4178(1) | 3107(3) | 64(1)  |
| C(11A) | 6308(3)  | 4463(1) | 2958(3) | 67(1)  |
| C(12A) | 5719(3)  | 4644(1) | 1757(3) | 59(1)  |
| C(13A) | 4502(3)  | 4526(1) | 702(3)  | 76(1)  |
| C(14A) | 3923(3)  | 4240(1) | 829(3)  | 75(1)  |

|        |          |         |          |        |
|--------|----------|---------|----------|--------|
| C(15A) | 6351(3)  | 4948(1) | 1578(3)  | 62(1)  |
| C(16A) | 7779(3)  | 4995(1) | 2192(4)  | 88(1)  |
| C(17A) | 8348(4)  | 5279(1) | 1985(5)  | 102(1) |
| C(18A) | 7526(4)  | 5515(1) | 1175(4)  | 86(1)  |
| C(19A) | 6123(4)  | 5471(1) | 541(4)   | 86(1)  |
| C(20A) | 5540(3)  | 5190(1) | 731(4)   | 79(1)  |
| C(21A) | 1587(2)  | 3685(1) | 1975(2)  | 52(1)  |
| C(22A) | -902(2)  | 3592(1) | 1361(3)  | 58(1)  |
| C(23A) | -2072(3) | 3502(1) | -44(3)   | 78(1)  |
| C(24A) | -1220(3) | 3894(1) | 1935(4)  | 80(1)  |
| C(25A) | -605(3)  | 3315(1) | 2352(3)  | 72(1)  |
| C(1B)  | 8103(3)  | 6556(1) | 5652(3)  | 76(1)  |
| C(2B)  | 9420(3)  | 6439(1) | 5974(4)  | 90(1)  |
| C(3B)  | 9619(3)  | 6203(1) | 5192(3)  | 84(1)  |
| C(4B)  | 8494(4)  | 6082(1) | 4084(3)  | 88(1)  |
| C(5B)  | 7161(3)  | 6201(1) | 3733(3)  | 76(1)  |
| C(6B)  | 6945(3)  | 6440(1) | 4513(3)  | 58(1)  |
| C(7B)  | 5558(3)  | 6587(1) | 4204(3)  | 59(1)  |
| C(8B)  | 4324(3)  | 6526(1) | 2782(3)  | 55(1)  |
| C(9B)  | 3735(2)  | 6188(1) | 2652(2)  | 53(1)  |
| C(10B) | 3116(3)  | 6079(1) | 3484(3)  | 58(1)  |
| C(11B) | 2534(3)  | 5777(1) | 3301(3)  | 64(1)  |
| C(12B) | 2561(3)  | 5572(1) | 2275(3)  | 64(1)  |
| C(13B) | 3167(3)  | 5687(1) | 1435(3)  | 72(1)  |
| C(14B) | 3749(3)  | 5988(1) | 1624(3)  | 65(1)  |
| C(15B) | 1958(3)  | 5245(1) | 2044(4)  | 75(1)  |
| C(16B) | 2035(3)  | 5056(1) | 3139(4)  | 92(1)  |
| C(17B) | 1518(4)  | 4746(1) | 2918(6)  | 115(2) |
| C(18B) | 931(5)   | 4623(1) | 1600(7)  | 126(2) |
| C(19B) | 800(5)   | 4808(1) | 480(6)   | 125(2) |
| C(20B) | 1324(4)  | 5117(1) | 709(4)   | 100(1) |
| C(21B) | 2489(3)  | 6879(1) | 1275(3)  | 55(1)  |
| C(22B) | 813(4)   | 7301(1) | 82(3)    | 73(1)  |
| C(23B) | 30(7)    | 7526(1) | 597(4)   | 140(2) |
| C(24B) | 1833(5)  | 7477(1) | -332(4)  | 107(1) |
| C(25B) | -187(4)  | 7096(1) | -1099(4) | 91(1)  |
| C(1C)  | 8109(3)  | 6493(1) | 11002(3) | 69(1)  |
| C(2C)  | 9442(3)  | 6380(1) | 11391(3) | 80(1)  |

|        |         |         |          |        |
|--------|---------|---------|----------|--------|
| C(3C)  | 9833(3) | 6250(1) | 10430(3) | 75(1)  |
| C(4C)  | 8884(3) | 6235(1) | 9056(3)  | 71(1)  |
| C(5C)  | 7535(3) | 6348(1) | 8647(3)  | 63(1)  |
| C(6C)  | 7123(2) | 6476(1) | 9619(3)  | 54(1)  |
| C(7C)  | 5704(3) | 6610(1) | 9268(3)  | 56(1)  |
| C(8C)  | 4512(2) | 6552(1) | 7811(2)  | 50(1)  |
| C(9C)  | 3930(2) | 6213(1) | 7699(2)  | 47(1)  |
| C(10C) | 4332(2) | 5971(1) | 7059(3)  | 56(1)  |
| C(11C) | 3747(2) | 5669(1) | 6884(3)  | 57(1)  |
| C(12C) | 2704(2) | 5602(1) | 7317(2)  | 51(1)  |
| C(13C) | 2323(3) | 5846(1) | 7977(3)  | 59(1)  |
| C(14C) | 2933(2) | 6144(1) | 8175(3)  | 56(1)  |
| C(15C) | 2009(3) | 5286(1) | 7052(3)  | 56(1)  |
| C(16C) | 2743(3) | 5007(1) | 7137(3)  | 70(1)  |
| C(17C) | 2090(4) | 4714(1) | 6874(4)  | 86(1)  |
| C(18C) | 689(4)  | 4694(1) | 6506(5)  | 98(1)  |
| C(19C) | -65(4)  | 4966(1) | 6404(5)  | 106(1) |
| C(20C) | 585(3)  | 5260(1) | 6676(4)  | 84(1)  |
| C(21C) | 2605(3) | 6886(1) | 6281(3)  | 55(1)  |
| C(22C) | 934(4)  | 7309(1) | 5076(3)  | 78(1)  |
| C(23C) | 1953(5) | 7484(1) | 4662(4)  | 99(1)  |
| C(24C) | 142(7)  | 7534(1) | 5603(4)  | 137(2) |
| C(25C) | -86(4)  | 7102(1) | 3889(4)  | 91(1)  |

**Table S6.** Bond lengths [ $\text{\AA}$ ] and angles [ $^\circ$ ] for **8**.

|              |          |
|--------------|----------|
| N(1)-C(21)   | 1.348(3) |
| N(1)-C(8)    | 1.458(3) |
| N(1)-H(1)    | 0.88(3)  |
| N(1A)-C(21A) | 1.347(3) |
| N(1A)-C(8A)  | 1.458(3) |
| N(1A)-H(1A)  | 0.89(3)  |
| N(1B)-C(21B) | 1.344(3) |
| N(1B)-C(8B)  | 1.452(3) |
| N(1B)-H(1B)  | 0.83(4)  |
| N(1C)-C(21C) | 1.345(3) |

|              |          |
|--------------|----------|
| N(1C)-C(8C)  | 1.448(3) |
| N(1C)-H(1C)  | 0.87(4)  |
| O(1)-C(7)    | 1.201(3) |
| O(2)-C(21)   | 1.212(3) |
| O(3)-C(21)   | 1.337(3) |
| O(3)-C(22)   | 1.480(2) |
| O(1A)-C(7A)  | 1.203(3) |
| O(2A)-C(21A) | 1.212(3) |
| O(3A)-C(21A) | 1.336(3) |
| O(3A)-C(22A) | 1.480(2) |
| O(1B)-C(7B)  | 1.211(3) |
| O(2B)-C(21B) | 1.208(3) |
| O(3B)-C(21B) | 1.342(3) |
| O(3B)-C(22B) | 1.475(3) |
| O(1C)-C(7C)  | 1.207(3) |
| O(2C)-C(21C) | 1.207(3) |
| O(3C)-C(21C) | 1.344(3) |
| O(3C)-C(22C) | 1.478(3) |
| C(1)-C(2)    | 1.372(5) |
| C(1)-C(6)    | 1.393(4) |
| C(1)-H(1D)   | 0.9300   |
| C(2)-C(3)    | 1.369(7) |
| C(2)-H(2)    | 0.9300   |
| C(3)-C(4)    | 1.377(6) |
| C(3)-H(3)    | 0.9300   |
| C(4)-C(5)    | 1.390(5) |
| C(4)-H(4)    | 0.9300   |
| C(5)-C(6)    | 1.379(4) |
| C(5)-H(5)    | 0.9300   |
| C(6)-C(7)    | 1.497(4) |
| C(7)-C(8)    | 1.547(3) |
| C(8)-C(9)    | 1.507(3) |
| C(8)-H(8)    | 0.9800   |
| C(9)-C(10)   | 1.387(3) |
| C(9)-C(14)   | 1.388(4) |
| C(10)-C(11)  | 1.384(4) |
| C(10)-H(10)  | 0.9300   |
| C(11)-C(12)  | 1.395(4) |

|              |          |
|--------------|----------|
| C(11)-H(11)  | 0.9300   |
| C(12)-C(13)  | 1.390(4) |
| C(12)-C(15)  | 1.493(3) |
| C(13)-C(14)  | 1.386(4) |
| C(13)-H(13)  | 0.9300   |
| C(14)-H(14)  | 0.9300   |
| C(15)-C(16)  | 1.381(4) |
| C(15)-C(20)  | 1.390(4) |
| C(16)-C(17)  | 1.387(4) |
| C(16)-H(16)  | 0.9300   |
| C(17)-C(18)  | 1.360(5) |
| C(17)-H(17)  | 0.9300   |
| C(18)-C(19)  | 1.375(5) |
| C(18)-H(18)  | 0.9300   |
| C(19)-C(20)  | 1.388(4) |
| C(19)-H(19)  | 0.9300   |
| C(20)-H(20)  | 0.9300   |
| C(22)-C(25)  | 1.504(4) |
| C(22)-C(24)  | 1.508(4) |
| C(22)-C(23)  | 1.523(4) |
| C(23)-H(23A) | 0.9600   |
| C(23)-H(23B) | 0.9600   |
| C(23)-H(23C) | 0.9600   |
| C(24)-H(24A) | 0.9600   |
| C(24)-H(24B) | 0.9600   |
| C(24)-H(24C) | 0.9600   |
| C(25)-H(25A) | 0.9600   |
| C(25)-H(25B) | 0.9600   |
| C(25)-H(25C) | 0.9600   |
| C(1A)-C(2A)  | 1.371(6) |
| C(1A)-C(6A)  | 1.394(4) |
| C(1A)-H(1E)  | 0.9300   |
| C(2A)-C(3A)  | 1.371(7) |
| C(2A)-H(2A)  | 0.9300   |
| C(3A)-C(4A)  | 1.370(7) |
| C(3A)-H(3A)  | 0.9300   |
| C(4A)-C(5A)  | 1.385(5) |
| C(4A)-H(4A)  | 0.9300   |



|               |          |
|---------------|----------|
| C(5A)-C(6A)   | 1.389(4) |
| C(5A)-H(5A)   | 0.9300   |
| C(6A)-C(7A)   | 1.490(4) |
| C(7A)-C(8A)   | 1.542(3) |
| C(8A)-C(9A)   | 1.514(3) |
| C(8A)-H(8A)   | 0.9800   |
| C(9A)-C(14A)  | 1.383(4) |
| C(9A)-C(10A)  | 1.384(3) |
| C(10A)-C(11A) | 1.385(4) |
| C(10A)-H(10A) | 0.9300   |
| C(11A)-C(12A) | 1.380(4) |
| C(11A)-H(11A) | 0.9300   |
| C(12A)-C(13A) | 1.388(4) |
| C(12A)-C(15A) | 1.486(4) |
| C(13A)-C(14A) | 1.376(4) |
| C(13A)-H(13A) | 0.9300   |
| C(14A)-H(14A) | 0.9300   |
| C(15A)-C(16A) | 1.382(4) |
| C(15A)-C(20A) | 1.384(4) |
| C(16A)-C(17A) | 1.392(5) |
| C(16A)-H(16A) | 0.9300   |
| C(17A)-C(18A) | 1.354(5) |
| C(17A)-H(17A) | 0.9300   |
| C(18A)-C(19A) | 1.357(5) |
| C(18A)-H(18A) | 0.9300   |
| C(19A)-C(20A) | 1.384(4) |
| C(19A)-H(19A) | 0.9300   |
| C(20A)-H(20A) | 0.9300   |
| C(22A)-C(24A) | 1.502(4) |
| C(22A)-C(25A) | 1.506(4) |
| C(22A)-C(23A) | 1.525(4) |
| C(23A)-H(23D) | 0.9600   |
| C(23A)-H(23E) | 0.9600   |
| C(23A)-H(23F) | 0.9600   |
| C(24A)-H(24D) | 0.9600   |
| C(24A)-H(24E) | 0.9600   |
| C(24A)-H(24F) | 0.9600   |
| C(25A)-H(25D) | 0.9600   |

|               |          |
|---------------|----------|
| C(25A)-H(25E) | 0.9600   |
| C(25A)-H(25F) | 0.9600   |
| C(1B)-C(2B)   | 1.376(5) |
| C(1B)-C(6B)   | 1.391(4) |
| C(1B)-H(1F)   | 0.9300   |
| C(2B)-C(3B)   | 1.362(5) |
| C(2B)-H(2B)   | 0.9300   |
| C(3B)-C(4B)   | 1.365(5) |
| C(3B)-H(3B)   | 0.9300   |
| C(4B)-C(5B)   | 1.389(4) |
| C(4B)-H(4B)   | 0.9300   |
| C(5B)-C(6B)   | 1.378(4) |
| C(5B)-H(5B)   | 0.9300   |
| C(6B)-C(7B)   | 1.492(4) |
| C(7B)-C(8B)   | 1.539(3) |
| C(8B)-C(9B)   | 1.526(3) |
| C(8B)-H(8B)   | 0.9800   |
| C(9B)-C(14B)  | 1.379(3) |
| C(9B)-C(10B)  | 1.380(3) |
| C(10B)-C(11B) | 1.385(4) |
| C(10B)-H(10B) | 0.9300   |
| C(11B)-C(12B) | 1.394(4) |
| C(11B)-H(11B) | 0.9300   |
| C(12B)-C(13B) | 1.386(4) |
| C(12B)-C(15B) | 1.488(4) |
| C(13B)-C(14B) | 1.381(4) |
| C(13B)-H(13B) | 0.9300   |
| C(14B)-H(14B) | 0.9300   |
| C(15B)-C(16B) | 1.379(5) |
| C(15B)-C(20B) | 1.390(5) |
| C(16B)-C(17B) | 1.388(5) |
| C(16B)-H(16B) | 0.9300   |
| C(17B)-C(18B) | 1.366(7) |
| C(17B)-H(17B) | 0.9300   |
| C(18B)-C(19B) | 1.376(7) |
| C(18B)-H(18B) | 0.9300   |
| C(19B)-C(20B) | 1.387(5) |
| C(19B)-H(19B) | 0.9300   |

|               |          |
|---------------|----------|
| C(20B)-H(20B) | 0.9300   |
| C(22B)-C(23B) | 1.502(5) |
| C(22B)-C(25B) | 1.515(5) |
| C(22B)-C(24B) | 1.519(6) |
| C(23B)-H(23G) | 0.9600   |
| C(23B)-H(23H) | 0.9600   |
| C(23B)-H(23I) | 0.9600   |
| C(24B)-H(24G) | 0.9600   |
| C(24B)-H(24H) | 0.9600   |
| C(24B)-H(24I) | 0.9600   |
| C(25B)-H(25G) | 0.9600   |
| C(25B)-H(25H) | 0.9600   |
| C(25B)-H(25I) | 0.9600   |
| C(1C)-C(2C)   | 1.374(4) |
| C(1C)-C(6C)   | 1.394(4) |
| C(1C)-H(1G)   | 0.9300   |
| C(2C)-C(3C)   | 1.366(5) |
| C(2C)-H(2C)   | 0.9300   |
| C(3C)-C(4C)   | 1.375(4) |
| C(3C)-H(3C)   | 0.9300   |
| C(4C)-C(5C)   | 1.386(4) |
| C(4C)-H(4C)   | 0.9300   |
| C(5C)-C(6C)   | 1.387(4) |
| C(5C)-H(5C)   | 0.9300   |
| C(6C)-C(7C)   | 1.493(3) |
| C(7C)-C(8C)   | 1.542(3) |
| C(8C)-C(9C)   | 1.529(3) |
| C(8C)-H(8C)   | 0.9800   |
| C(9C)-C(14C)  | 1.379(3) |
| C(9C)-C(10C)  | 1.384(3) |
| C(10C)-C(11C) | 1.384(3) |
| C(10C)-H(10C) | 0.9300   |
| C(11C)-C(12C) | 1.392(3) |
| C(11C)-H(11C) | 0.9300   |
| C(12C)-C(13C) | 1.392(3) |
| C(12C)-C(15C) | 1.480(3) |
| C(13C)-C(14C) | 1.379(4) |
| C(13C)-H(13C) | 0.9300   |

|                    |            |
|--------------------|------------|
| C(14C)-H(14C)      | 0.9300     |
| C(15C)-C(16C)      | 1.385(4)   |
| C(15C)-C(20C)      | 1.389(4)   |
| C(16C)-C(17C)      | 1.376(4)   |
| C(16C)-H(16C)      | 0.9300     |
| C(17C)-C(18C)      | 1.365(5)   |
| C(17C)-H(17C)      | 0.9300     |
| C(18C)-C(19C)      | 1.370(5)   |
| C(18C)-H(18C)      | 0.9300     |
| C(19C)-C(20C)      | 1.379(4)   |
| C(19C)-H(19C)      | 0.9300     |
| C(20C)-H(20C)      | 0.9300     |
| C(22C)-C(23C)      | 1.514(6)   |
| C(22C)-C(24C)      | 1.517(5)   |
| C(22C)-C(25C)      | 1.531(5)   |
| C(23C)-H(23J)      | 0.9600     |
| C(23C)-H(23K)      | 0.9600     |
| C(23C)-H(23L)      | 0.9600     |
| C(24C)-H(24J)      | 0.9600     |
| C(24C)-H(24K)      | 0.9600     |
| C(24C)-H(24L)      | 0.9600     |
| C(25C)-H(25J)      | 0.9600     |
| C(25C)-H(25K)      | 0.9600     |
| C(25C)-H(25L)      | 0.9600     |
|                    |            |
| C(21)-N(1)-C(8)    | 122.0(2)   |
| C(21)-N(1)-H(1)    | 117(2)     |
| C(8)-N(1)-H(1)     | 121(2)     |
| C(21A)-N(1A)-C(8A) | 122.1(2)   |
| C(21A)-N(1A)-H(1A) | 117.6(17)  |
| C(8A)-N(1A)-H(1A)  | 120.3(17)  |
| C(21B)-N(1B)-C(8B) | 120.2(2)   |
| C(21B)-N(1B)-H(1B) | 121(2)     |
| C(8B)-N(1B)-H(1B)  | 119(2)     |
| C(21C)-N(1C)-C(8C) | 120.4(2)   |
| C(21C)-N(1C)-H(1C) | 121(2)     |
| C(8C)-N(1C)-H(1C)  | 118(2)     |
| C(21)-O(3)-C(22)   | 121.88(19) |

|                     |            |
|---------------------|------------|
| C(21A)-O(3A)-C(22A) | 121.64(18) |
| C(21B)-O(3B)-C(22B) | 119.8(2)   |
| C(21C)-O(3C)-C(22C) | 119.8(2)   |
| C(2)-C(1)-C(6)      | 120.7(4)   |
| C(2)-C(1)-H(1D)     | 119.7      |
| C(6)-C(1)-H(1D)     | 119.7      |
| C(3)-C(2)-C(1)      | 120.3(4)   |
| C(3)-C(2)-H(2)      | 119.8      |
| C(1)-C(2)-H(2)      | 119.8      |
| C(2)-C(3)-C(4)      | 119.9(3)   |
| C(2)-C(3)-H(3)      | 120.0      |
| C(4)-C(3)-H(3)      | 120.0      |
| C(3)-C(4)-C(5)      | 120.2(4)   |
| C(3)-C(4)-H(4)      | 119.9      |
| C(5)-C(4)-H(4)      | 119.9      |
| C(6)-C(5)-C(4)      | 120.0(3)   |
| C(6)-C(5)-H(5)      | 120.0      |
| C(4)-C(5)-H(5)      | 120.0      |
| C(5)-C(6)-C(1)      | 118.9(3)   |
| C(5)-C(6)-C(7)      | 123.7(3)   |
| C(1)-C(6)-C(7)      | 117.4(3)   |
| O(1)-C(7)-C(6)      | 120.6(2)   |
| O(1)-C(7)-C(8)      | 120.0(2)   |
| C(6)-C(7)-C(8)      | 119.4(2)   |
| N(1)-C(8)-C(9)      | 113.3(2)   |
| N(1)-C(8)-C(7)      | 107.97(19) |
| C(9)-C(8)-C(7)      | 111.49(18) |
| N(1)-C(8)-H(8)      | 108.0      |
| C(9)-C(8)-H(8)      | 108.0      |
| C(7)-C(8)-H(8)      | 108.0      |
| C(10)-C(9)-C(14)    | 117.8(2)   |
| C(10)-C(9)-C(8)     | 120.6(2)   |
| C(14)-C(9)-C(8)     | 121.6(2)   |
| C(11)-C(10)-C(9)    | 120.8(2)   |
| C(11)-C(10)-H(10)   | 119.6      |
| C(9)-C(10)-H(10)    | 119.6      |
| C(10)-C(11)-C(12)   | 122.0(2)   |
| C(10)-C(11)-H(11)   | 119.0      |

|                    |            |
|--------------------|------------|
| C(12)-C(11)-H(11)  | 119.0      |
| C(13)-C(12)-C(11)  | 116.6(2)   |
| C(13)-C(12)-C(15)  | 121.2(2)   |
| C(11)-C(12)-C(15)  | 122.2(2)   |
| C(14)-C(13)-C(12)  | 121.7(2)   |
| C(14)-C(13)-H(13)  | 119.2      |
| C(12)-C(13)-H(13)  | 119.2      |
| C(13)-C(14)-C(9)   | 121.1(2)   |
| C(13)-C(14)-H(14)  | 119.4      |
| C(9)-C(14)-H(14)   | 119.4      |
| C(16)-C(15)-C(20)  | 117.0(3)   |
| C(16)-C(15)-C(12)  | 121.5(2)   |
| C(20)-C(15)-C(12)  | 121.5(2)   |
| C(15)-C(16)-C(17)  | 121.1(3)   |
| C(15)-C(16)-H(16)  | 119.4      |
| C(17)-C(16)-H(16)  | 119.4      |
| C(18)-C(17)-C(16)  | 121.4(3)   |
| C(18)-C(17)-H(17)  | 119.3      |
| C(16)-C(17)-H(17)  | 119.3      |
| C(17)-C(18)-C(19)  | 118.5(3)   |
| C(17)-C(18)-H(18)  | 120.8      |
| C(19)-C(18)-H(18)  | 120.8      |
| C(18)-C(19)-C(20)  | 120.6(3)   |
| C(18)-C(19)-H(19)  | 119.7      |
| C(20)-C(19)-H(19)  | 119.7      |
| C(19)-C(20)-C(15)  | 121.4(3)   |
| C(19)-C(20)-H(20)  | 119.3      |
| C(15)-C(20)-H(20)  | 119.3      |
| O(2)-C(21)-O(3)    | 126.0(2)   |
| O(2)-C(21)-N(1)    | 124.5(2)   |
| O(3)-C(21)-N(1)    | 109.5(2)   |
| O(3)-C(22)-C(25)   | 109.3(2)   |
| O(3)-C(22)-C(24)   | 110.8(2)   |
| C(25)-C(22)-C(24)  | 112.6(2)   |
| O(3)-C(22)-C(23)   | 102.04(19) |
| C(25)-C(22)-C(23)  | 112.1(3)   |
| C(24)-C(22)-C(23)  | 109.4(2)   |
| C(22)-C(23)-H(23A) | 109.5      |

|                     |          |
|---------------------|----------|
| C(22)-C(23)-H(23B)  | 109.5    |
| H(23A)-C(23)-H(23B) | 109.5    |
| C(22)-C(23)-H(23C)  | 109.5    |
| H(23A)-C(23)-H(23C) | 109.5    |
| H(23B)-C(23)-H(23C) | 109.5    |
| C(22)-C(24)-H(24A)  | 109.5    |
| C(22)-C(24)-H(24B)  | 109.5    |
| H(24A)-C(24)-H(24B) | 109.5    |
| C(22)-C(24)-H(24C)  | 109.5    |
| H(24A)-C(24)-H(24C) | 109.5    |
| H(24B)-C(24)-H(24C) | 109.5    |
| C(22)-C(25)-H(25A)  | 109.5    |
| C(22)-C(25)-H(25B)  | 109.5    |
| H(25A)-C(25)-H(25B) | 109.5    |
| C(22)-C(25)-H(25C)  | 109.5    |
| H(25A)-C(25)-H(25C) | 109.5    |
| H(25B)-C(25)-H(25C) | 109.5    |
| C(2A)-C(1A)-C(6A)   | 120.8(4) |
| C(2A)-C(1A)-H(1E)   | 119.6    |
| C(6A)-C(1A)-H(1E)   | 119.6    |
| C(3A)-C(2A)-C(1A)   | 120.3(4) |
| C(3A)-C(2A)-H(2A)   | 119.8    |
| C(1A)-C(2A)-H(2A)   | 119.8    |
| C(4A)-C(3A)-C(2A)   | 119.9(4) |
| C(4A)-C(3A)-H(3A)   | 120.0    |
| C(2A)-C(3A)-H(3A)   | 120.0    |
| C(3A)-C(4A)-C(5A)   | 120.5(4) |
| C(3A)-C(4A)-H(4A)   | 119.8    |
| C(5A)-C(4A)-H(4A)   | 119.8    |
| C(4A)-C(5A)-C(6A)   | 120.2(4) |
| C(4A)-C(5A)-H(5A)   | 119.9    |
| C(6A)-C(5A)-H(5A)   | 119.9    |
| C(5A)-C(6A)-C(1A)   | 118.3(3) |
| C(5A)-C(6A)-C(7A)   | 124.0(3) |
| C(1A)-C(6A)-C(7A)   | 117.7(3) |
| O(1A)-C(7A)-C(6A)   | 120.8(2) |
| O(1A)-C(7A)-C(8A)   | 120.0(3) |
| C(6A)-C(7A)-C(8A)   | 119.2(2) |

|                      |            |
|----------------------|------------|
| N(1A)-C(8A)-C(9A)    | 113.7(2)   |
| N(1A)-C(8A)-C(7A)    | 107.87(19) |
| C(9A)-C(8A)-C(7A)    | 111.27(19) |
| N(1A)-C(8A)-H(8A)    | 107.9      |
| C(9A)-C(8A)-H(8A)    | 107.9      |
| C(7A)-C(8A)-H(8A)    | 107.9      |
| C(14A)-C(9A)-C(10A)  | 117.8(2)   |
| C(14A)-C(9A)-C(8A)   | 122.8(2)   |
| C(10A)-C(9A)-C(8A)   | 119.4(2)   |
| C(9A)-C(10A)-C(11A)  | 120.7(3)   |
| C(9A)-C(10A)-H(10A)  | 119.7      |
| C(11A)-C(10A)-H(10A) | 119.7      |
| C(12A)-C(11A)-C(10A) | 121.9(2)   |
| C(12A)-C(11A)-H(11A) | 119.0      |
| C(10A)-C(11A)-H(11A) | 119.0      |
| C(11A)-C(12A)-C(13A) | 116.7(2)   |
| C(11A)-C(12A)-C(15A) | 122.4(2)   |
| C(13A)-C(12A)-C(15A) | 121.0(3)   |
| C(14A)-C(13A)-C(12A) | 121.9(3)   |
| C(14A)-C(13A)-H(13A) | 119.0      |
| C(12A)-C(13A)-H(13A) | 119.0      |
| C(13A)-C(14A)-C(9A)  | 120.9(3)   |
| C(13A)-C(14A)-H(14A) | 119.5      |
| C(9A)-C(14A)-H(14A)  | 119.5      |
| C(16A)-C(15A)-C(20A) | 116.8(3)   |
| C(16A)-C(15A)-C(12A) | 121.6(3)   |
| C(20A)-C(15A)-C(12A) | 121.5(2)   |
| C(15A)-C(16A)-C(17A) | 120.6(3)   |
| C(15A)-C(16A)-H(16A) | 119.7      |
| C(17A)-C(16A)-H(16A) | 119.7      |
| C(18A)-C(17A)-C(16A) | 121.3(3)   |
| C(18A)-C(17A)-H(17A) | 119.4      |
| C(16A)-C(17A)-H(17A) | 119.4      |
| C(17A)-C(18A)-C(19A) | 119.1(3)   |
| C(17A)-C(18A)-H(18A) | 120.4      |
| C(19A)-C(18A)-H(18A) | 120.4      |
| C(18A)-C(19A)-C(20A) | 120.4(3)   |
| C(18A)-C(19A)-H(19A) | 119.8      |



|                      |            |
|----------------------|------------|
| C(20A)-C(19A)-H(19A) | 119.8      |
| C(19A)-C(20A)-C(15A) | 121.8(3)   |
| C(19A)-C(20A)-H(20A) | 119.1      |
| C(15A)-C(20A)-H(20A) | 119.1      |
| O(2A)-C(21A)-O(3A)   | 125.8(2)   |
| O(2A)-C(21A)-N(1A)   | 124.6(2)   |
| O(3A)-C(21A)-N(1A)   | 109.58(19) |
| O(3A)-C(22A)-C(24A)  | 109.6(2)   |
| O(3A)-C(22A)-C(25A)  | 110.8(2)   |
| C(24A)-C(22A)-C(25A) | 112.4(2)   |
| O(3A)-C(22A)-C(23A)  | 102.03(19) |
| C(24A)-C(22A)-C(23A) | 112.1(3)   |
| C(25A)-C(22A)-C(23A) | 109.4(2)   |
| C(22A)-C(23A)-H(23D) | 109.5      |
| C(22A)-C(23A)-H(23E) | 109.5      |
| H(23D)-C(23A)-H(23E) | 109.5      |
| C(22A)-C(23A)-H(23F) | 109.5      |
| H(23D)-C(23A)-H(23F) | 109.5      |
| H(23E)-C(23A)-H(23F) | 109.5      |
| C(22A)-C(24A)-H(24D) | 109.5      |
| C(22A)-C(24A)-H(24E) | 109.5      |
| H(24D)-C(24A)-H(24E) | 109.5      |
| C(22A)-C(24A)-H(24F) | 109.5      |
| H(24D)-C(24A)-H(24F) | 109.5      |
| H(24E)-C(24A)-H(24F) | 109.5      |
| C(22A)-C(25A)-H(25D) | 109.5      |
| C(22A)-C(25A)-H(25E) | 109.5      |
| H(25D)-C(25A)-H(25E) | 109.5      |
| C(22A)-C(25A)-H(25F) | 109.5      |
| H(25D)-C(25A)-H(25F) | 109.5      |
| H(25E)-C(25A)-H(25F) | 109.5      |
| C(2B)-C(1B)-C(6B)    | 120.9(3)   |
| C(2B)-C(1B)-H(1F)    | 119.5      |
| C(6B)-C(1B)-H(1F)    | 119.5      |
| C(3B)-C(2B)-C(1B)    | 120.7(3)   |
| C(3B)-C(2B)-H(2B)    | 119.6      |
| C(1B)-C(2B)-H(2B)    | 119.6      |
| C(2B)-C(3B)-C(4B)    | 119.3(3)   |

|                      |            |
|----------------------|------------|
| C(2B)-C(3B)-H(3B)    | 120.4      |
| C(4B)-C(3B)-H(3B)    | 120.4      |
| C(3B)-C(4B)-C(5B)    | 120.7(3)   |
| C(3B)-C(4B)-H(4B)    | 119.7      |
| C(5B)-C(4B)-H(4B)    | 119.7      |
| C(6B)-C(5B)-C(4B)    | 120.6(3)   |
| C(6B)-C(5B)-H(5B)    | 119.7      |
| C(4B)-C(5B)-H(5B)    | 119.7      |
| C(5B)-C(6B)-C(1B)    | 117.8(3)   |
| C(5B)-C(6B)-C(7B)    | 124.4(2)   |
| C(1B)-C(6B)-C(7B)    | 117.8(3)   |
| O(1B)-C(7B)-C(6B)    | 120.5(2)   |
| O(1B)-C(7B)-C(8B)    | 120.0(2)   |
| C(6B)-C(7B)-C(8B)    | 119.4(2)   |
| N(1B)-C(8B)-C(9B)    | 111.7(2)   |
| N(1B)-C(8B)-C(7B)    | 108.4(2)   |
| C(9B)-C(8B)-C(7B)    | 112.74(19) |
| N(1B)-C(8B)-H(8B)    | 107.9      |
| C(9B)-C(8B)-H(8B)    | 107.9      |
| C(7B)-C(8B)-H(8B)    | 107.9      |
| C(14B)-C(9B)-C(10B)  | 118.2(2)   |
| C(14B)-C(9B)-C(8B)   | 119.4(2)   |
| C(10B)-C(9B)-C(8B)   | 122.3(2)   |
| C(9B)-C(10B)-C(11B)  | 121.1(2)   |
| C(9B)-C(10B)-H(10B)  | 119.5      |
| C(11B)-C(10B)-H(10B) | 119.5      |
| C(10B)-C(11B)-C(12B) | 121.0(2)   |
| C(10B)-C(11B)-H(11B) | 119.5      |
| C(12B)-C(11B)-H(11B) | 119.5      |
| C(13B)-C(12B)-C(11B) | 117.3(3)   |
| C(13B)-C(12B)-C(15B) | 119.7(3)   |
| C(11B)-C(12B)-C(15B) | 123.0(3)   |
| C(14B)-C(13B)-C(12B) | 121.5(3)   |
| C(14B)-C(13B)-H(13B) | 119.2      |
| C(12B)-C(13B)-H(13B) | 119.2      |
| C(9B)-C(14B)-C(13B)  | 121.0(2)   |
| C(9B)-C(14B)-H(14B)  | 119.5      |
| C(13B)-C(14B)-H(14B) | 119.5      |

|                      |          |
|----------------------|----------|
| C(16B)-C(15B)-C(20B) | 117.8(3) |
| C(16B)-C(15B)-C(12B) | 121.5(3) |
| C(20B)-C(15B)-C(12B) | 120.6(3) |
| C(15B)-C(16B)-C(17B) | 121.1(4) |
| C(15B)-C(16B)-H(16B) | 119.4    |
| C(17B)-C(16B)-H(16B) | 119.4    |
| C(18B)-C(17B)-C(16B) | 119.9(4) |
| C(18B)-C(17B)-H(17B) | 120.0    |
| C(16B)-C(17B)-H(17B) | 120.0    |
| C(17B)-C(18B)-C(19B) | 120.4(4) |
| C(17B)-C(18B)-H(18B) | 119.8    |
| C(19B)-C(18B)-H(18B) | 119.8    |
| C(18B)-C(19B)-C(20B) | 119.3(5) |
| C(18B)-C(19B)-H(19B) | 120.3    |
| C(20B)-C(19B)-H(19B) | 120.3    |
| C(19B)-C(20B)-C(15B) | 121.3(4) |
| C(19B)-C(20B)-H(20B) | 119.3    |
| C(15B)-C(20B)-H(20B) | 119.3    |
| O(2B)-C(21B)-O(3B)   | 125.6(2) |
| O(2B)-C(21B)-N(1B)   | 124.4(2) |
| O(3B)-C(21B)-N(1B)   | 109.9(2) |
| O(3B)-C(22B)-C(23B)  | 102.6(2) |
| O(3B)-C(22B)-C(25B)  | 110.5(2) |
| C(23B)-C(22B)-C(25B) | 110.9(4) |
| O(3B)-C(22B)-C(24B)  | 109.1(3) |
| C(23B)-C(22B)-C(24B) | 111.7(4) |
| C(25B)-C(22B)-C(24B) | 111.6(3) |
| C(22B)-C(23B)-H(23G) | 109.5    |
| C(22B)-C(23B)-H(23H) | 109.5    |
| H(23G)-C(23B)-H(23H) | 109.5    |
| C(22B)-C(23B)-H(23I) | 109.5    |
| H(23G)-C(23B)-H(23I) | 109.5    |
| H(23H)-C(23B)-H(23I) | 109.5    |
| C(22B)-C(24B)-H(24G) | 109.5    |
| C(22B)-C(24B)-H(24H) | 109.5    |
| H(24G)-C(24B)-H(24H) | 109.5    |
| C(22B)-C(24B)-H(24I) | 109.5    |
| H(24G)-C(24B)-H(24I) | 109.5    |

|                      |            |
|----------------------|------------|
| H(24H)-C(24B)-H(24I) | 109.5      |
| C(22B)-C(25B)-H(25G) | 109.5      |
| C(22B)-C(25B)-H(25H) | 109.5      |
| H(25G)-C(25B)-H(25H) | 109.5      |
| C(22B)-C(25B)-H(25I) | 109.5      |
| H(25G)-C(25B)-H(25I) | 109.5      |
| H(25H)-C(25B)-H(25I) | 109.5      |
| C(2C)-C(1C)-C(6C)    | 120.7(3)   |
| C(2C)-C(1C)-H(1G)    | 119.6      |
| C(6C)-C(1C)-H(1G)    | 119.6      |
| C(3C)-C(2C)-C(1C)    | 120.8(3)   |
| C(3C)-C(2C)-H(2C)    | 119.6      |
| C(1C)-C(2C)-H(2C)    | 119.6      |
| C(2C)-C(3C)-C(4C)    | 119.5(3)   |
| C(2C)-C(3C)-H(3C)    | 120.2      |
| C(4C)-C(3C)-H(3C)    | 120.3      |
| C(3C)-C(4C)-C(5C)    | 120.4(3)   |
| C(3C)-C(4C)-H(4C)    | 119.8      |
| C(5C)-C(4C)-H(4C)    | 119.8      |
| C(4C)-C(5C)-C(6C)    | 120.5(3)   |
| C(4C)-C(5C)-H(5C)    | 119.8      |
| C(6C)-C(5C)-H(5C)    | 119.8      |
| C(5C)-C(6C)-C(1C)    | 118.1(2)   |
| C(5C)-C(6C)-C(7C)    | 124.1(2)   |
| C(1C)-C(6C)-C(7C)    | 117.7(2)   |
| O(1C)-C(7C)-C(6C)    | 120.8(2)   |
| O(1C)-C(7C)-C(8C)    | 119.4(2)   |
| C(6C)-C(7C)-C(8C)    | 119.8(2)   |
| N(1C)-C(8C)-C(9C)    | 112.25(18) |
| N(1C)-C(8C)-C(7C)    | 107.50(19) |
| C(9C)-C(8C)-C(7C)    | 110.75(18) |
| N(1C)-C(8C)-H(8C)    | 108.8      |
| C(9C)-C(8C)-H(8C)    | 108.8      |
| C(7C)-C(8C)-H(8C)    | 108.8      |
| C(14C)-C(9C)-C(10C)  | 117.9(2)   |
| C(14C)-C(9C)-C(8C)   | 120.7(2)   |
| C(10C)-C(9C)-C(8C)   | 121.3(2)   |
| C(11C)-C(10C)-C(9C)  | 121.4(2)   |

|                      |          |
|----------------------|----------|
| C(11C)-C(10C)-H(10C) | 119.3    |
| C(9C)-C(10C)-H(10C)  | 119.3    |
| C(10C)-C(11C)-C(12C) | 120.8(2) |
| C(10C)-C(11C)-H(11C) | 119.6    |
| C(12C)-C(11C)-H(11C) | 119.6    |
| C(13C)-C(12C)-C(11C) | 117.2(2) |
| C(13C)-C(12C)-C(15C) | 121.7(2) |
| C(11C)-C(12C)-C(15C) | 121.1(2) |
| C(14C)-C(13C)-C(12C) | 121.6(2) |
| C(14C)-C(13C)-H(13C) | 119.2    |
| C(12C)-C(13C)-H(13C) | 119.2    |
| C(13C)-C(14C)-C(9C)  | 121.0(2) |
| C(13C)-C(14C)-H(14C) | 119.5    |
| C(9C)-C(14C)-H(14C)  | 119.5    |
| C(16C)-C(15C)-C(20C) | 117.5(3) |
| C(16C)-C(15C)-C(12C) | 121.5(2) |
| C(20C)-C(15C)-C(12C) | 121.0(2) |
| C(17C)-C(16C)-C(15C) | 121.4(3) |
| C(17C)-C(16C)-H(16C) | 119.3    |
| C(15C)-C(16C)-H(16C) | 119.3    |
| C(18C)-C(17C)-C(16C) | 120.2(3) |
| C(18C)-C(17C)-H(17C) | 119.9    |
| C(16C)-C(17C)-H(17C) | 119.9    |
| C(17C)-C(18C)-C(19C) | 119.7(3) |
| C(17C)-C(18C)-H(18C) | 120.2    |
| C(19C)-C(18C)-H(18C) | 120.2    |
| C(18C)-C(19C)-C(20C) | 120.4(3) |
| C(18C)-C(19C)-H(19C) | 119.8    |
| C(20C)-C(19C)-H(19C) | 119.8    |
| C(19C)-C(20C)-C(15C) | 120.9(3) |
| C(19C)-C(20C)-H(20C) | 119.6    |
| C(15C)-C(20C)-H(20C) | 119.6    |
| O(2C)-C(21C)-O(3C)   | 125.5(2) |
| O(2C)-C(21C)-N(1C)   | 124.6(2) |
| O(3C)-C(21C)-N(1C)   | 109.9(2) |
| O(3C)-C(22C)-C(23C)  | 109.2(3) |
| O(3C)-C(22C)-C(24C)  | 101.9(2) |
| C(23C)-C(22C)-C(24C) | 112.3(4) |

|                      |          |
|----------------------|----------|
| O(3C)-C(22C)-C(25C)  | 110.6(3) |
| C(23C)-C(22C)-C(25C) | 112.0(3) |
| C(24C)-C(22C)-C(25C) | 110.4(4) |
| C(22C)-C(23C)-H(23J) | 109.5    |
| C(22C)-C(23C)-H(23K) | 109.5    |
| H(23J)-C(23C)-H(23K) | 109.5    |
| C(22C)-C(23C)-H(23L) | 109.5    |
| H(23J)-C(23C)-H(23L) | 109.5    |
| H(23K)-C(23C)-H(23L) | 109.5    |
| C(22C)-C(24C)-H(24J) | 109.5    |
| C(22C)-C(24C)-H(24K) | 109.5    |
| H(24J)-C(24C)-H(24K) | 109.5    |
| C(22C)-C(24C)-H(24L) | 109.5    |
| H(24J)-C(24C)-H(24L) | 109.5    |
| H(24K)-C(24C)-H(24L) | 109.5    |
| C(22C)-C(25C)-H(25J) | 109.5    |
| C(22C)-C(25C)-H(25K) | 109.5    |
| H(25J)-C(25C)-H(25K) | 109.5    |
| C(22C)-C(25C)-H(25L) | 109.5    |
| H(25J)-C(25C)-H(25L) | 109.5    |
| H(25K)-C(25C)-H(25L) | 109.5    |

---

Symmetry transformations used to generate equivalent atoms:

**Table S7.** Anisotropic displacement parameters ( $\text{\AA}^2 \times 10^3$ ) for **8**. The anisotropic displacement factor exponent takes the form:  $-2\pi^2 [h^2 a^{*2} U^{11} + \dots + 2 h k a^* b^* U^{12}]$

|       | $U^{11}$ | $U^{22}$ | $U^{33}$ | $U^{23}$ | $U^{13}$ | $U^{12}$ |
|-------|----------|----------|----------|----------|----------|----------|
| N(1)  | 44(1)    | 72(1)    | 51(1)    | -5(1)    | 25(1)    | -5(1)    |
| N(1A) | 44(1)    | 74(1)    | 50(1)    | -8(1)    | 24(1)    | -7(1)    |
| N(1B) | 76(1)    | 56(1)    | 52(1)    | 5(1)     | 30(1)    | 11(1)    |
| N(1C) | 66(1)    | 51(1)    | 53(1)    | 5(1)     | 25(1)    | 12(1)    |
| O(1)  | 100(2)   | 67(1)    | 160(2)   | -11(1)   | 99(2)    | -4(1)    |
| O(2)  | 61(1)    | 97(1)    | 58(1)    | -17(1)   | 34(1)    | -15(1)   |
| O(3)  | 44(1)    | 103(1)   | 57(1)    | 3(1)     | 27(1)    | -6(1)    |
| O(1A) | 92(2)    | 80(1)    | 146(2)   | -12(1)   | 89(2)    | -5(1)    |

|       |        |        |        |        |       |        |
|-------|--------|--------|--------|--------|-------|--------|
| O(2A) | 60(1)  | 96(1)  | 55(1)  | -17(1) | 32(1) | -16(1) |
| O(3A) | 46(1)  | 96(1)  | 54(1)  | -1(1)  | 28(1) | -5(1)  |
| O(1B) | 71(1)  | 112(2) | 71(1)  | -26(1) | 30(1) | -2(1)  |
| O(2B) | 81(1)  | 84(1)  | 55(1)  | 3(1)   | 32(1) | 18(1)  |
| O(3B) | 95(1)  | 61(1)  | 51(1)  | 7(1)   | 30(1) | 24(1)  |
| O(1C) | 65(1)  | 122(2) | 68(1)  | -29(1) | 22(1) | 7(1)   |
| O(2C) | 79(1)  | 83(1)  | 55(1)  | 6(1)   | 31(1) | 25(1)  |
| O(3C) | 85(1)  | 67(1)  | 51(1)  | 10(1)  | 27(1) | 29(1)  |
| C(1)  | 80(2)  | 65(2)  | 89(2)  | -2(1)  | 31(2) | 10(1)  |
| C(2)  | 125(3) | 60(2)  | 121(3) | 8(2)   | 48(3) | 19(2)  |
| C(3)  | 121(3) | 57(2)  | 107(3) | 11(2)  | 30(2) | 0(2)   |
| C(4)  | 98(2)  | 86(2)  | 95(2)  | 17(2)  | 35(2) | -17(2) |
| C(5)  | 77(2)  | 63(2)  | 77(2)  | 4(1)   | 30(2) | -10(1) |
| C(6)  | 51(1)  | 59(1)  | 65(2)  | -1(1)  | 16(1) | -2(1)  |
| C(7)  | 47(1)  | 60(1)  | 71(2)  | -7(1)  | 28(1) | -6(1)  |
| C(8)  | 47(1)  | 58(1)  | 55(1)  | -6(1)  | 25(1) | -5(1)  |
| C(9)  | 46(1)  | 52(1)  | 59(1)  | -5(1)  | 27(1) | 0(1)   |
| C(10) | 61(1)  | 60(1)  | 56(1)  | 0(1)   | 17(1) | -4(1)  |
| C(11) | 64(1)  | 60(1)  | 60(2)  | -6(1)  | 13(1) | -8(1)  |
| C(12) | 52(1)  | 52(1)  | 65(1)  | -4(1)  | 30(1) | 0(1)   |
| C(13) | 75(2)  | 64(1)  | 57(1)  | -4(1)  | 31(1) | -9(1)  |
| C(14) | 72(2)  | 66(2)  | 55(1)  | -12(1) | 28(1) | -14(1) |
| C(15) | 53(1)  | 52(1)  | 74(2)  | -5(1)  | 34(1) | 1(1)   |
| C(16) | 95(2)  | 62(2)  | 77(2)  | -9(1)  | 42(2) | -12(1) |
| C(17) | 105(2) | 60(2)  | 101(2) | -16(2) | 52(2) | -22(2) |
| C(18) | 82(2)  | 54(1)  | 106(2) | 2(1)   | 53(2) | -4(1)  |
| C(19) | 82(2)  | 71(2)  | 91(2)  | 17(2)  | 36(2) | -2(2)  |
| C(20) | 72(2)  | 67(2)  | 76(2)  | 3(1)   | 26(1) | -7(1)  |
| C(21) | 52(1)  | 58(1)  | 57(1)  | -4(1)  | 30(1) | -4(1)  |
| C(22) | 51(1)  | 78(2)  | 61(1)  | 3(1)   | 35(1) | -4(1)  |
| C(23) | 52(1)  | 110(2) | 67(2)  | 2(2)   | 30(1) | -7(1)  |
| C(24) | 72(2)  | 73(2)  | 68(2)  | -1(1)  | 36(1) | -14(1) |
| C(25) | 77(2)  | 72(2)  | 115(3) | -5(2)  | 60(2) | -3(1)  |
| C(1A) | 80(2)  | 79(2)  | 87(2)  | 0(2)   | 29(2) | 15(2)  |
| C(2A) | 131(3) | 67(2)  | 120(3) | 7(2)   | 45(3) | 20(2)  |
| C(3A) | 123(3) | 67(2)  | 110(3) | 12(2)  | 27(3) | 3(2)   |
| C(4A) | 96(2)  | 91(2)  | 95(3)  | 17(2)  | 29(2) | -18(2) |
| C(5A) | 76(2)  | 72(2)  | 76(2)  | 3(1)   | 30(2) | -6(1)  |

|        |        |        |        |        |       |        |
|--------|--------|--------|--------|--------|-------|--------|
| C(6A)  | 52(1)  | 67(2)  | 64(2)  | -2(1)  | 15(1) | -1(1)  |
| C(7A)  | 46(1)  | 67(2)  | 67(2)  | -8(1)  | 26(1) | -5(1)  |
| C(8A)  | 48(1)  | 66(1)  | 52(1)  | -7(1)  | 24(1) | -7(1)  |
| C(9A)  | 49(1)  | 61(1)  | 55(1)  | -8(1)  | 26(1) | -3(1)  |
| C(10A) | 55(1)  | 67(2)  | 62(2)  | -2(1)  | 16(1) | -2(1)  |
| C(11A) | 53(1)  | 67(2)  | 69(2)  | -12(1) | 15(1) | -8(1)  |
| C(12A) | 55(1)  | 59(1)  | 67(2)  | -11(1) | 30(1) | -2(1)  |
| C(13A) | 76(2)  | 74(2)  | 65(2)  | 4(1)   | 17(1) | -14(1) |
| C(14A) | 66(2)  | 81(2)  | 62(2)  | 0(1)   | 12(1) | -20(1) |
| C(15A) | 58(1)  | 61(1)  | 70(2)  | -13(1) | 32(1) | -3(1)  |
| C(16A) | 62(2)  | 74(2)  | 120(3) | 9(2)   | 31(2) | -3(1)  |
| C(17A) | 72(2)  | 94(2)  | 137(3) | 3(2)   | 42(2) | -19(2) |
| C(18A) | 96(2)  | 68(2)  | 101(2) | -8(2)  | 50(2) | -18(2) |
| C(19A) | 99(2)  | 64(2)  | 90(2)  | -1(2)  | 35(2) | -1(2)  |
| C(20A) | 68(2)  | 66(2)  | 96(2)  | -4(2)  | 28(2) | -2(1)  |
| C(21A) | 50(1)  | 59(1)  | 52(1)  | -6(1)  | 27(1) | -4(1)  |
| C(22A) | 51(1)  | 76(2)  | 60(1)  | 0(1)   | 34(1) | -6(1)  |
| C(23A) | 50(1)  | 122(3) | 68(2)  | -4(2)  | 30(1) | -11(2) |
| C(24A) | 75(2)  | 78(2)  | 107(2) | -8(2)  | 58(2) | -4(1)  |
| C(25A) | 76(2)  | 75(2)  | 74(2)  | -2(1)  | 40(2) | -17(1) |
| C(1B)  | 69(2)  | 85(2)  | 71(2)  | -12(2) | 26(1) | -10(2) |
| C(2B)  | 61(2)  | 109(3) | 88(2)  | -7(2)  | 19(2) | -4(2)  |
| C(3B)  | 68(2)  | 109(2) | 71(2)  | 15(2)  | 25(1) | 16(2)  |
| C(4B)  | 81(2)  | 103(2) | 73(2)  | 0(2)   | 25(2) | 24(2)  |
| C(5B)  | 70(2)  | 89(2)  | 58(2)  | -5(1)  | 18(1) | 8(2)   |
| C(6B)  | 61(1)  | 63(1)  | 51(1)  | 9(1)   | 24(1) | -3(1)  |
| C(7B)  | 63(1)  | 64(1)  | 51(1)  | 0(1)   | 27(1) | -6(1)  |
| C(8B)  | 60(1)  | 55(1)  | 50(1)  | 4(1)   | 25(1) | 4(1)   |
| C(9B)  | 52(1)  | 57(1)  | 48(1)  | 6(1)   | 20(1) | 6(1)   |
| C(10B) | 61(1)  | 59(1)  | 52(1)  | 2(1)   | 25(1) | 4(1)   |
| C(11B) | 62(1)  | 69(2)  | 62(2)  | 11(1)  | 28(1) | 2(1)   |
| C(12B) | 57(1)  | 58(1)  | 72(2)  | 6(1)   | 22(1) | 4(1)   |
| C(13B) | 83(2)  | 63(2)  | 80(2)  | -13(1) | 43(2) | -7(1)  |
| C(14B) | 75(2)  | 66(2)  | 64(2)  | -6(1)  | 39(1) | -6(1)  |
| C(15B) | 62(2)  | 62(2)  | 94(2)  | 8(1)   | 27(1) | 3(1)   |
| C(16B) | 70(2)  | 76(2)  | 110(3) | 26(2)  | 21(2) | -1(2)  |
| C(17B) | 87(2)  | 83(2)  | 157(4) | 39(3)  | 33(3) | -6(2)  |
| C(18B) | 107(3) | 68(2)  | 199(6) | -5(3)  | 61(4) | -22(2) |



|        |        |        |        |        |       |        |
|--------|--------|--------|--------|--------|-------|--------|
| C(19B) | 135(4) | 83(3)  | 157(4) | -27(3) | 62(3) | -34(3) |
| C(20B) | 109(3) | 76(2)  | 115(3) | -14(2) | 48(2) | -21(2) |
| C(21B) | 66(1)  | 48(1)  | 56(1)  | 2(1)   | 29(1) | 1(1)   |
| C(22B) | 101(2) | 60(1)  | 49(1)  | 6(1)   | 22(1) | 22(1)  |
| C(23B) | 212(6) | 122(3) | 74(2)  | 19(2)  | 51(3) | 108(4) |
| C(24B) | 133(3) | 76(2)  | 89(2)  | 27(2)  | 26(2) | -5(2)  |
| C(25B) | 87(2)  | 80(2)  | 80(2)  | 3(2)   | 10(2) | 11(2)  |
| C(1C)  | 64(2)  | 78(2)  | 56(2)  | 3(1)   | 18(1) | 3(1)   |
| C(2C)  | 60(2)  | 95(2)  | 69(2)  | 8(2)   | 11(1) | 8(2)   |
| C(3C)  | 54(1)  | 71(2)  | 88(2)  | 10(1)  | 19(1) | 7(1)   |
| C(4C)  | 55(1)  | 74(2)  | 83(2)  | -8(1)  | 29(1) | -1(1)  |
| C(5C)  | 51(1)  | 68(2)  | 64(2)  | -7(1)  | 20(1) | -4(1)  |
| C(6C)  | 51(1)  | 51(1)  | 54(1)  | 3(1)   | 18(1) | -5(1)  |
| C(7C)  | 54(1)  | 59(1)  | 53(1)  | -2(1)  | 22(1) | -4(1)  |
| C(8C)  | 50(1)  | 53(1)  | 47(1)  | 4(1)   | 20(1) | 6(1)   |
| C(9C)  | 44(1)  | 51(1)  | 40(1)  | 5(1)   | 12(1) | 7(1)   |
| C(10C) | 52(1)  | 58(1)  | 64(1)  | -2(1)  | 30(1) | 0(1)   |
| C(11C) | 57(1)  | 53(1)  | 66(1)  | -6(1)  | 30(1) | 3(1)   |
| C(12C) | 43(1)  | 56(1)  | 50(1)  | 6(1)   | 15(1) | 7(1)   |
| C(13C) | 57(1)  | 60(1)  | 67(2)  | 0(1)   | 33(1) | 3(1)   |
| C(14C) | 59(1)  | 55(1)  | 59(1)  | -3(1)  | 31(1) | 5(1)   |
| C(15C) | 54(1)  | 56(1)  | 59(1)  | 4(1)   | 24(1) | 3(1)   |
| C(16C) | 65(2)  | 58(1)  | 88(2)  | 3(1)   | 32(1) | 6(1)   |
| C(17C) | 90(2)  | 57(2)  | 113(3) | 1(2)   | 45(2) | 5(2)   |
| C(18C) | 97(2)  | 64(2)  | 136(3) | -7(2)  | 53(2) | -19(2) |
| C(19C) | 69(2)  | 82(2)  | 169(4) | -10(2) | 52(2) | -16(2) |
| C(20C) | 60(2)  | 66(2)  | 126(3) | -4(2)  | 40(2) | -2(1)  |
| C(21C) | 61(1)  | 50(1)  | 56(1)  | 5(1)   | 27(1) | 6(1)   |
| C(22C) | 99(2)  | 76(2)  | 51(2)  | 15(1)  | 25(1) | 38(2)  |
| C(23C) | 135(3) | 71(2)  | 78(2)  | 23(2)  | 32(2) | 11(2)  |
| C(24C) | 192(5) | 141(4) | 77(2)  | 29(2)  | 55(3) | 118(4) |
| C(25C) | 82(2)  | 109(3) | 67(2)  | 16(2)  | 16(2) | 23(2)  |

---

**Table S8.** Hydrogen coordinates ( $\times 10^4$ ) and isotropic displacement parameters ( $\text{\AA}^2 \times 10^{-3}$ ) for **8**.

|        | x     | y    | z    | U(eq) |
|--------|-------|------|------|-------|
| H(1D)  | 5596  | 2905 | 6089 | 96    |
| H(2)   | 5246  | 2378 | 6445 | 124   |
| H(3)   | 4003  | 2243 | 7691 | 122   |
| H(4)   | 3073  | 2637 | 8563 | 115   |
| H(5)   | 3409  | 3170 | 8205 | 88    |
| H(8)   | 4281  | 3681 | 8221 | 63    |
| H(10)  | 5800  | 4113 | 9123 | 73    |
| H(11)  | 6688  | 4598 | 8893 | 79    |
| H(13)  | 4538  | 4548 | 4760 | 77    |
| H(14)  | 3683  | 4058 | 4984 | 77    |
| H(16)  | 7308  | 5054 | 8679 | 91    |
| H(17)  | 8065  | 5554 | 8427 | 103   |
| H(18)  | 7489  | 5769 | 6264 | 92    |
| H(19)  | 6103  | 5477 | 4315 | 98    |
| H(20)  | 5339  | 4974 | 4545 | 88    |
| H(23A) | -2099 | 3639 | 4333 | 112   |
| H(23B) | -2820 | 3446 | 5112 | 112   |
| H(23C) | -1709 | 3280 | 4717 | 112   |
| H(24A) | -94   | 3132 | 7163 | 103   |
| H(24B) | -1362 | 3238 | 7463 | 103   |
| H(24C) | 127   | 3380 | 8348 | 103   |
| H(25A) | -385  | 3943 | 7792 | 122   |
| H(25B) | -1978 | 3856 | 7081 | 122   |
| H(25C) | -1308 | 4050 | 6253 | 122   |
| H(1E)  | 5559  | 2941 | 1050 | 101   |
| H(2A)  | 5257  | 2413 | 1430 | 131   |
| H(3A)  | 4032  | 2271 | 2689 | 130   |
| H(4A)  | 3099  | 2660 | 3570 | 118   |
| H(5A)  | 3371  | 3194 | 3187 | 91    |
| H(8A)  | 4185  | 3705 | 3168 | 66    |
| H(10A) | 6131  | 4066 | 3941 | 77    |
| H(11A) | 7122  | 4535 | 3689 | 80    |
| H(13A) | 4064  | 4644 | -114 | 91    |
| H(14A) | 3109  | 4168 | 97   | 90    |

|        |       |      |       |     |
|--------|-------|------|-------|-----|
| H(16A) | 8365  | 4836 | 2749  | 105 |
| H(17A) | 9312  | 5308 | 2411  | 123 |
| H(18A) | 7919  | 5705 | 1054  | 103 |
| H(19A) | 5549  | 5631 | -23   | 103 |
| H(20A) | 4576  | 5163 | 277   | 95  |
| H(23D) | -2222 | 3674 | -693  | 118 |
| H(23E) | -2915 | 3463 | 64    | 118 |
| H(23F) | -1815 | 3313 | -389  | 118 |
| H(24D) | -453  | 3945 | 2809  | 120 |
| H(24E) | -2052 | 3865 | 2074  | 120 |
| H(24F) | -1357 | 4066 | 1290  | 120 |
| H(25D) | -220  | 3142 | 2036  | 108 |
| H(25E) | -1457 | 3247 | 2386  | 108 |
| H(25F) | 52    | 3380 | 3266  | 108 |
| H(1F)  | 7985  | 6716 | 6204  | 92  |
| H(2B)  | 10182 | 6521 | 6733  | 108 |
| H(3B)  | 10511 | 6125 | 5412  | 101 |
| H(4B)  | 8621  | 5918 | 3558  | 106 |
| H(5B)  | 6407  | 6119 | 2965  | 91  |
| H(8B)  | 4662  | 6553 | 2059  | 66  |
| H(10B) | 3090  | 6211 | 4178  | 69  |
| H(11B) | 2119  | 5709 | 3872  | 76  |
| H(13B) | 3181  | 5558 | 728   | 87  |
| H(14B) | 4158  | 6058 | 1051  | 78  |
| H(16B) | 2439  | 5137 | 4040  | 110 |
| H(17B) | 1572  | 4622 | 3667  | 139 |
| H(18B) | 617   | 4413 | 1458  | 151 |
| H(19B) | 365   | 4728 | -421  | 150 |
| H(20B) | 1249  | 5242 | -47   | 120 |
| H(23G) | -645  | 7408 | 794   | 209 |
| H(23H) | -439  | 7684 | -104  | 209 |
| H(23I) | 675   | 7629 | 1432  | 209 |
| H(24G) | 2495  | 7591 | 458   | 160 |
| H(24H) | 1331  | 7625 | -1067 | 160 |
| H(24I) | 2318  | 7326 | -650  | 160 |
| H(25G) | 336   | 6951 | -1398 | 136 |
| H(25H) | -756  | 7230 | -1865 | 136 |
| H(25I) | -772  | 6976 | -784  | 136 |

|        |          |         |          |       |
|--------|----------|---------|----------|-------|
| H(1G)  | 7861     | 6582    | 11669    | 83    |
| H(2C)  | 10086    | 6392    | 12319    | 97    |
| H(3C)  | 10734    | 6171    | 10704    | 90    |
| H(4C)  | 9149     | 6149    | 8396     | 85    |
| H(5C)  | 6901     | 6337    | 7715     | 75    |
| H(8C)  | 4882     | 6578    | 7113     | 60    |
| H(10C) | 5009     | 6012    | 6739     | 67    |
| H(11C) | 4055     | 5510    | 6473     | 69    |
| H(13C) | 1640     | 5808    | 8291     | 71    |
| H(14C) | 2669     | 6301    | 8636     | 67    |
| H(16C) | 3696     | 5018    | 7377     | 84    |
| H(17C) | 2605     | 4529    | 6947     | 103   |
| H(18C) | 248      | 4496    | 6326     | 117   |
| H(19C) | -1020    | 4953    | 6151     | 128   |
| H(20C) | 63       | 5444    | 6606     | 101   |
| H(23J) | 2610     | 7599    | 5449     | 149   |
| H(23K) | 1451     | 7630    | 3919     | 149   |
| H(23L) | 2443     | 7332    | 4355     | 149   |
| H(24J) | -533     | 7416    | 5795     | 206   |
| H(24K) | -328     | 7693    | 4907     | 206   |
| H(24L) | 786      | 7637    | 6441     | 206   |
| H(25J) | 430      | 6958    | 3579     | 137   |
| H(25K) | -666     | 7236    | 3129     | 137   |
| H(25L) | -661     | 6982    | 4215     | 137   |
| H(1A)  | 2120(30) | 3684(6) | 450(30)  | 52(7) |
| H(1)   | 2210(30) | 3667(7) | 5510(30) | 65(8) |
| H(1C)  | 3330(30) | 6857(8) | 8290(40) | 72(9) |
| H(1B)  | 3150(30) | 6835(8) | 3240(40) | 73(9) |

---

**Table S9.** Torsion angles [°] for **8**.

---

|                     |         |
|---------------------|---------|
| C(6)-C(1)-C(2)-C(3) | -0.5(6) |
| C(1)-C(2)-C(3)-C(4) | 0.4(7)  |
| C(2)-C(3)-C(4)-C(5) | -0.3(6) |
| C(3)-C(4)-C(5)-C(6) | 0.3(6)  |
| C(4)-C(5)-C(6)-C(1) | -0.4(5) |

|                         |           |
|-------------------------|-----------|
| C(4)-C(5)-C(6)-C(7)     | 179.5(3)  |
| C(2)-C(1)-C(6)-C(5)     | 0.5(5)    |
| C(2)-C(1)-C(6)-C(7)     | -179.4(3) |
| C(5)-C(6)-C(7)-O(1)     | 175.7(3)  |
| C(1)-C(6)-C(7)-O(1)     | -4.4(4)   |
| C(5)-C(6)-C(7)-C(8)     | -5.8(4)   |
| C(1)-C(6)-C(7)-C(8)     | 174.1(2)  |
| C(21)-N(1)-C(8)-C(9)    | -109.9(3) |
| C(21)-N(1)-C(8)-C(7)    | 126.2(2)  |
| O(1)-C(7)-C(8)-N(1)     | 114.0(3)  |
| C(6)-C(7)-C(8)-N(1)     | -64.5(3)  |
| O(1)-C(7)-C(8)-C(9)     | -11.0(4)  |
| C(6)-C(7)-C(8)-C(9)     | 170.5(2)  |
| N(1)-C(8)-C(9)-C(10)    | 132.2(2)  |
| C(7)-C(8)-C(9)-C(10)    | -105.8(3) |
| N(1)-C(8)-C(9)-C(14)    | -47.3(3)  |
| C(7)-C(8)-C(9)-C(14)    | 74.7(3)   |
| C(14)-C(9)-C(10)-C(11)  | -0.7(4)   |
| C(8)-C(9)-C(10)-C(11)   | 179.7(2)  |
| C(9)-C(10)-C(11)-C(12)  | 0.9(4)    |
| C(10)-C(11)-C(12)-C(13) | -0.4(4)   |
| C(10)-C(11)-C(12)-C(15) | 177.3(2)  |
| C(11)-C(12)-C(13)-C(14) | -0.3(4)   |
| C(15)-C(12)-C(13)-C(14) | -178.0(2) |
| C(12)-C(13)-C(14)-C(9)  | 0.6(4)    |
| C(10)-C(9)-C(14)-C(13)  | 0.0(4)    |
| C(8)-C(9)-C(14)-C(13)   | 179.5(2)  |
| C(13)-C(12)-C(15)-C(16) | 175.1(3)  |
| C(11)-C(12)-C(15)-C(16) | -2.4(4)   |
| C(13)-C(12)-C(15)-C(20) | -3.7(4)   |
| C(11)-C(12)-C(15)-C(20) | 178.7(3)  |
| C(20)-C(15)-C(16)-C(17) | 0.0(4)    |
| C(12)-C(15)-C(16)-C(17) | -178.9(3) |
| C(15)-C(16)-C(17)-C(18) | -0.1(5)   |
| C(16)-C(17)-C(18)-C(19) | 0.3(5)    |
| C(17)-C(18)-C(19)-C(20) | -0.4(5)   |
| C(18)-C(19)-C(20)-C(15) | 0.3(5)    |
| C(16)-C(15)-C(20)-C(19) | -0.1(4)   |

|                             |           |
|-----------------------------|-----------|
| C(12)-C(15)-C(20)-C(19)     | 178.8(3)  |
| C(22)-O(3)-C(21)-O(2)       | -5.3(4)   |
| C(22)-O(3)-C(21)-N(1)       | 173.8(2)  |
| C(8)-N(1)-C(21)-O(2)        | 1.8(4)    |
| C(8)-N(1)-C(21)-O(3)        | -177.3(2) |
| C(21)-O(3)-C(22)-C(25)      | 72.5(3)   |
| C(21)-O(3)-C(22)-C(24)      | -52.2(3)  |
| C(21)-O(3)-C(22)-C(23)      | -168.6(2) |
| C(6A)-C(1A)-C(2A)-C(3A)     | -0.5(7)   |
| C(1A)-C(2A)-C(3A)-C(4A)     | 0.0(7)    |
| C(2A)-C(3A)-C(4A)-C(5A)     | 0.3(7)    |
| C(3A)-C(4A)-C(5A)-C(6A)     | -0.1(6)   |
| C(4A)-C(5A)-C(6A)-C(1A)     | -0.4(5)   |
| C(4A)-C(5A)-C(6A)-C(7A)     | 179.5(3)  |
| C(2A)-C(1A)-C(6A)-C(5A)     | 0.7(5)    |
| C(2A)-C(1A)-C(6A)-C(7A)     | -179.2(3) |
| C(5A)-C(6A)-C(7A)-O(1A)     | 175.9(3)  |
| C(1A)-C(6A)-C(7A)-O(1A)     | -4.3(4)   |
| C(5A)-C(6A)-C(7A)-C(8A)     | -5.7(4)   |
| C(1A)-C(6A)-C(7A)-C(8A)     | 174.2(3)  |
| C(21A)-N(1A)-C(8A)-C(9A)    | -109.4(3) |
| C(21A)-N(1A)-C(8A)-C(7A)    | 126.7(2)  |
| O(1A)-C(7A)-C(8A)-N(1A)     | 113.3(3)  |
| C(6A)-C(7A)-C(8A)-N(1A)     | -65.1(3)  |
| O(1A)-C(7A)-C(8A)-C(9A)     | -12.1(4)  |
| C(6A)-C(7A)-C(8A)-C(9A)     | 169.5(2)  |
| N(1A)-C(8A)-C(9A)-C(14A)    | -29.5(3)  |
| C(7A)-C(8A)-C(9A)-C(14A)    | 92.5(3)   |
| N(1A)-C(8A)-C(9A)-C(10A)    | 152.3(2)  |
| C(7A)-C(8A)-C(9A)-C(10A)    | -85.7(3)  |
| C(14A)-C(9A)-C(10A)-C(11A)  | -2.8(4)   |
| C(8A)-C(9A)-C(10A)-C(11A)   | 175.5(2)  |
| C(9A)-C(10A)-C(11A)-C(12A)  | 1.9(4)    |
| C(10A)-C(11A)-C(12A)-C(13A) | 0.3(4)    |
| C(10A)-C(11A)-C(12A)-C(15A) | -179.1(2) |
| C(11A)-C(12A)-C(13A)-C(14A) | -1.5(5)   |
| C(15A)-C(12A)-C(13A)-C(14A) | 178.0(3)  |
| C(12A)-C(13A)-C(14A)-C(9A)  | 0.4(5)    |

|                             |           |
|-----------------------------|-----------|
| C(10A)-C(9A)-C(14A)-C(13A)  | 1.7(4)    |
| C(8A)-C(9A)-C(14A)-C(13A)   | -176.5(3) |
| C(11A)-C(12A)-C(15A)-C(16A) | 32.1(4)   |
| C(13A)-C(12A)-C(15A)-C(16A) | -147.3(3) |
| C(11A)-C(12A)-C(15A)-C(20A) | -151.3(3) |
| C(13A)-C(12A)-C(15A)-C(20A) | 29.3(4)   |
| C(20A)-C(15A)-C(16A)-C(17A) | 1.8(5)    |
| C(12A)-C(15A)-C(16A)-C(17A) | 178.6(3)  |
| C(15A)-C(16A)-C(17A)-C(18A) | -0.4(6)   |
| C(16A)-C(17A)-C(18A)-C(19A) | -0.8(6)   |
| C(17A)-C(18A)-C(19A)-C(20A) | 0.5(6)    |
| C(18A)-C(19A)-C(20A)-C(15A) | 0.9(5)    |
| C(16A)-C(15A)-C(20A)-C(19A) | -2.1(5)   |
| C(12A)-C(15A)-C(20A)-C(19A) | -178.9(3) |
| C(22A)-O(3A)-C(21A)-O(2A)   | -6.0(4)   |
| C(22A)-O(3A)-C(21A)-N(1A)   | 173.8(2)  |
| C(8A)-N(1A)-C(21A)-O(2A)    | 0.8(4)    |
| C(8A)-N(1A)-C(21A)-O(3A)    | -179.1(2) |
| C(21A)-O(3A)-C(22A)-C(24A)  | 71.5(3)   |
| C(21A)-O(3A)-C(22A)-C(25A)  | -53.2(3)  |
| C(21A)-O(3A)-C(22A)-C(23A)  | -169.6(2) |
| C(6B)-C(1B)-C(2B)-C(3B)     | -0.8(5)   |
| C(1B)-C(2B)-C(3B)-C(4B)     | -0.3(6)   |
| C(2B)-C(3B)-C(4B)-C(5B)     | 1.3(6)    |
| C(3B)-C(4B)-C(5B)-C(6B)     | -1.1(5)   |
| C(4B)-C(5B)-C(6B)-C(1B)     | 0.1(4)    |
| C(4B)-C(5B)-C(6B)-C(7B)     | 178.9(3)  |
| C(2B)-C(1B)-C(6B)-C(5B)     | 0.9(5)    |
| C(2B)-C(1B)-C(6B)-C(7B)     | -178.1(3) |
| C(5B)-C(6B)-C(7B)-O(1B)     | 168.6(3)  |
| C(1B)-C(6B)-C(7B)-O(1B)     | -12.5(4)  |
| C(5B)-C(6B)-C(7B)-C(8B)     | -13.4(4)  |
| C(1B)-C(6B)-C(7B)-C(8B)     | 165.5(2)  |
| C(21B)-N(1B)-C(8B)-C(9B)    | -89.9(3)  |
| C(21B)-N(1B)-C(8B)-C(7B)    | 145.3(2)  |
| O(1B)-C(7B)-C(8B)-N(1B)     | 16.0(3)   |
| C(6B)-C(7B)-C(8B)-N(1B)     | -162.0(2) |
| O(1B)-C(7B)-C(8B)-C(9B)     | -108.2(3) |

|                             |           |
|-----------------------------|-----------|
| C(6B)-C(7B)-C(8B)-C(9B)     | 73.8(3)   |
| N(1B)-C(8B)-C(9B)-C(14B)    | 118.1(3)  |
| C(7B)-C(8B)-C(9B)-C(14B)    | -119.5(3) |
| N(1B)-C(8B)-C(9B)-C(10B)    | -58.5(3)  |
| C(7B)-C(8B)-C(9B)-C(10B)    | 63.9(3)   |
| C(14B)-C(9B)-C(10B)-C(11B)  | 0.5(4)    |
| C(8B)-C(9B)-C(10B)-C(11B)   | 177.1(2)  |
| C(9B)-C(10B)-C(11B)-C(12B)  | 0.3(4)    |
| C(10B)-C(11B)-C(12B)-C(13B) | -1.2(4)   |
| C(10B)-C(11B)-C(12B)-C(15B) | 179.6(2)  |
| C(11B)-C(12B)-C(13B)-C(14B) | 1.5(4)    |
| C(15B)-C(12B)-C(13B)-C(14B) | -179.4(3) |
| C(10B)-C(9B)-C(14B)-C(13B)  | -0.3(4)   |
| C(8B)-C(9B)-C(14B)-C(13B)   | -177.0(2) |
| C(12B)-C(13B)-C(14B)-C(9B)  | -0.7(5)   |
| C(13B)-C(12B)-C(15B)-C(16B) | 144.6(3)  |
| C(11B)-C(12B)-C(15B)-C(16B) | -36.3(4)  |
| C(13B)-C(12B)-C(15B)-C(20B) | -34.0(4)  |
| C(11B)-C(12B)-C(15B)-C(20B) | 145.1(3)  |
| C(20B)-C(15B)-C(16B)-C(17B) | 1.2(5)    |
| C(12B)-C(15B)-C(16B)-C(17B) | -177.5(3) |
| C(15B)-C(16B)-C(17B)-C(18B) | 0.4(6)    |
| C(16B)-C(17B)-C(18B)-C(19B) | -2.4(7)   |
| C(17B)-C(18B)-C(19B)-C(20B) | 2.7(8)    |
| C(18B)-C(19B)-C(20B)-C(15B) | -1.0(7)   |
| C(16B)-C(15B)-C(20B)-C(19B) | -0.9(6)   |
| C(12B)-C(15B)-C(20B)-C(19B) | 177.8(4)  |
| C(22B)-O(3B)-C(21B)-O(2B)   | -10.4(4)  |
| C(22B)-O(3B)-C(21B)-N(1B)   | 169.6(2)  |
| C(8B)-N(1B)-C(21B)-O(2B)    | 1.3(4)    |
| C(8B)-N(1B)-C(21B)-O(3B)    | -178.7(2) |
| C(21B)-O(3B)-C(22B)-C(23B)  | -177.0(4) |
| C(21B)-O(3B)-C(22B)-C(25B)  | 64.6(4)   |
| C(21B)-O(3B)-C(22B)-C(24B)  | -58.5(4)  |
| C(6C)-C(1C)-C(2C)-C(3C)     | 0.3(5)    |
| C(1C)-C(2C)-C(3C)-C(4C)     | 0.7(5)    |
| C(2C)-C(3C)-C(4C)-C(5C)     | -0.8(5)   |
| C(3C)-C(4C)-C(5C)-C(6C)     | -0.1(4)   |



|                             |           |
|-----------------------------|-----------|
| C(4C)-C(5C)-C(6C)-C(1C)     | 1.0(4)    |
| C(4C)-C(5C)-C(6C)-C(7C)     | 178.7(2)  |
| C(2C)-C(1C)-C(6C)-C(5C)     | -1.1(4)   |
| C(2C)-C(1C)-C(6C)-C(7C)     | -178.9(3) |
| C(5C)-C(6C)-C(7C)-O(1C)     | -169.0(3) |
| C(1C)-C(6C)-C(7C)-O(1C)     | 8.6(4)    |
| C(5C)-C(6C)-C(7C)-C(8C)     | 11.7(4)   |
| C(1C)-C(6C)-C(7C)-C(8C)     | -170.6(2) |
| C(21C)-N(1C)-C(8C)-C(9C)    | -84.5(3)  |
| C(21C)-N(1C)-C(8C)-C(7C)    | 153.5(2)  |
| O(1C)-C(7C)-C(8C)-N(1C)     | 21.4(3)   |
| C(6C)-C(7C)-C(8C)-N(1C)     | -159.4(2) |
| O(1C)-C(7C)-C(8C)-C(9C)     | -101.6(3) |
| C(6C)-C(7C)-C(8C)-C(9C)     | 77.7(3)   |
| N(1C)-C(8C)-C(9C)-C(14C)    | -36.5(3)  |
| C(7C)-C(8C)-C(9C)-C(14C)    | 83.7(2)   |
| N(1C)-C(8C)-C(9C)-C(10C)    | 140.3(2)  |
| C(7C)-C(8C)-C(9C)-C(10C)    | -99.5(3)  |
| C(14C)-C(9C)-C(10C)-C(11C)  | 0.7(3)    |
| C(8C)-C(9C)-C(10C)-C(11C)   | -176.2(2) |
| C(9C)-C(10C)-C(11C)-C(12C)  | 1.7(4)    |
| C(10C)-C(11C)-C(12C)-C(13C) | -2.5(4)   |
| C(10C)-C(11C)-C(12C)-C(15C) | 176.0(2)  |
| C(11C)-C(12C)-C(13C)-C(14C) | 1.1(4)    |
| C(15C)-C(12C)-C(13C)-C(14C) | -177.4(2) |
| C(12C)-C(13C)-C(14C)-C(9C)  | 1.3(4)    |
| C(10C)-C(9C)-C(14C)-C(13C)  | -2.1(3)   |
| C(8C)-C(9C)-C(14C)-C(13C)   | 174.8(2)  |
| C(13C)-C(12C)-C(15C)-C(16C) | -144.0(3) |
| C(11C)-C(12C)-C(15C)-C(16C) | 37.5(4)   |
| C(13C)-C(12C)-C(15C)-C(20C) | 37.5(4)   |
| C(11C)-C(12C)-C(15C)-C(20C) | -141.0(3) |
| C(20C)-C(15C)-C(16C)-C(17C) | -0.7(5)   |
| C(12C)-C(15C)-C(16C)-C(17C) | -179.2(3) |
| C(15C)-C(16C)-C(17C)-C(18C) | 0.7(5)    |
| C(16C)-C(17C)-C(18C)-C(19C) | -0.2(6)   |
| C(17C)-C(18C)-C(19C)-C(20C) | -0.2(7)   |
| C(18C)-C(19C)-C(20C)-C(15C) | 0.2(7)    |

|                             |           |
|-----------------------------|-----------|
| C(16C)-C(15C)-C(20C)-C(19C) | 0.2(5)    |
| C(12C)-C(15C)-C(20C)-C(19C) | 178.8(3)  |
| C(22C)-O(3C)-C(21C)-O(2C)   | -15.2(4)  |
| C(22C)-O(3C)-C(21C)-N(1C)   | 164.5(3)  |
| C(8C)-N(1C)-C(21C)-O(2C)    | -0.1(4)   |
| C(8C)-N(1C)-C(21C)-O(3C)    | -179.8(2) |
| C(21C)-O(3C)-C(22C)-C(23C)  | -58.8(4)  |
| C(21C)-O(3C)-C(22C)-C(24C)  | -177.7(4) |
| C(21C)-O(3C)-C(22C)-C(25C)  | 64.9(4)   |

**Table S10.** Hydrogen bonds for **8** [Å and °].

| D-H...A                 | d(D-H)  | d(H...A) | d(D...A) | <(DHA) |
|-------------------------|---------|----------|----------|--------|
| N(1B)-H(1B)...O(2C)     | 0.83(4) | 2.41(4)  | 3.174(3) | 154(3) |
| N(1C)-H(1C)...O(2B)#1   | 0.87(4) | 2.51(4)  | 3.314(3) | 155(3) |
| N(1)-H(1)...O(2A)       | 0.88(3) | 2.32(3)  | 3.171(3) | 162(3) |
| N(1A)-H(1A)...O(2)#2    | 0.89(3) | 2.27(3)  | 3.116(3) | 159(2) |
| C(25C)-H(25J)...O(2C)   | 0.96    | 2.37     | 2.941(4) | 117.9  |
| C(23C)-H(23L)...O(2C)   | 0.96    | 2.46     | 3.027(4) | 117.5  |
| C(8C)-H(8C)...O(1B)     | 0.98    | 2.60     | 3.554(3) | 165.8  |
| C(25B)-H(25G)...O(2B)   | 0.96    | 2.37     | 2.952(4) | 118.6  |
| C(24B)-H(24I)...O(2B)   | 0.96    | 2.40     | 2.977(4) | 118.0  |
| C(25A)-H(25F)...O(2A)   | 0.96    | 2.42     | 2.929(3) | 112.6  |
| C(24A)-H(24D)...O(2A)   | 0.96    | 2.58     | 3.120(4) | 116.2  |
| C(23A)-H(23E)...O(1A)#3 | 0.96    | 2.50     | 3.399(3) | 155.7  |
| C(25)-H(25A)...O(2)     | 0.96    | 2.60     | 3.148(4) | 116.2  |
| C(24)-H(24C)...O(2)     | 0.96    | 2.43     | 2.921(3) | 111.8  |
| C(23)-H(23B)...O(1)#3   | 0.96    | 2.51     | 3.415(3) | 157.1  |

Symmetry transformations used to generate equivalent atoms:

#1 x,y,z+1 #2 x,y,z-1 #3 x-1,y,z

7.37  
7.35  
7.34  
7.26  
7.24  
7.22  
7.22  
7.21  
7.20  
7.19  
7.19  
7.18  
7.18  
7.16  
7.16  
7.15  
7.14  
7.13  
7.11  
7.10

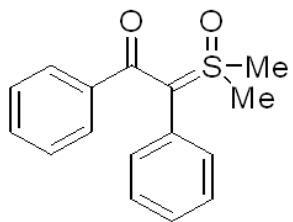

**1a**

it's a known compound

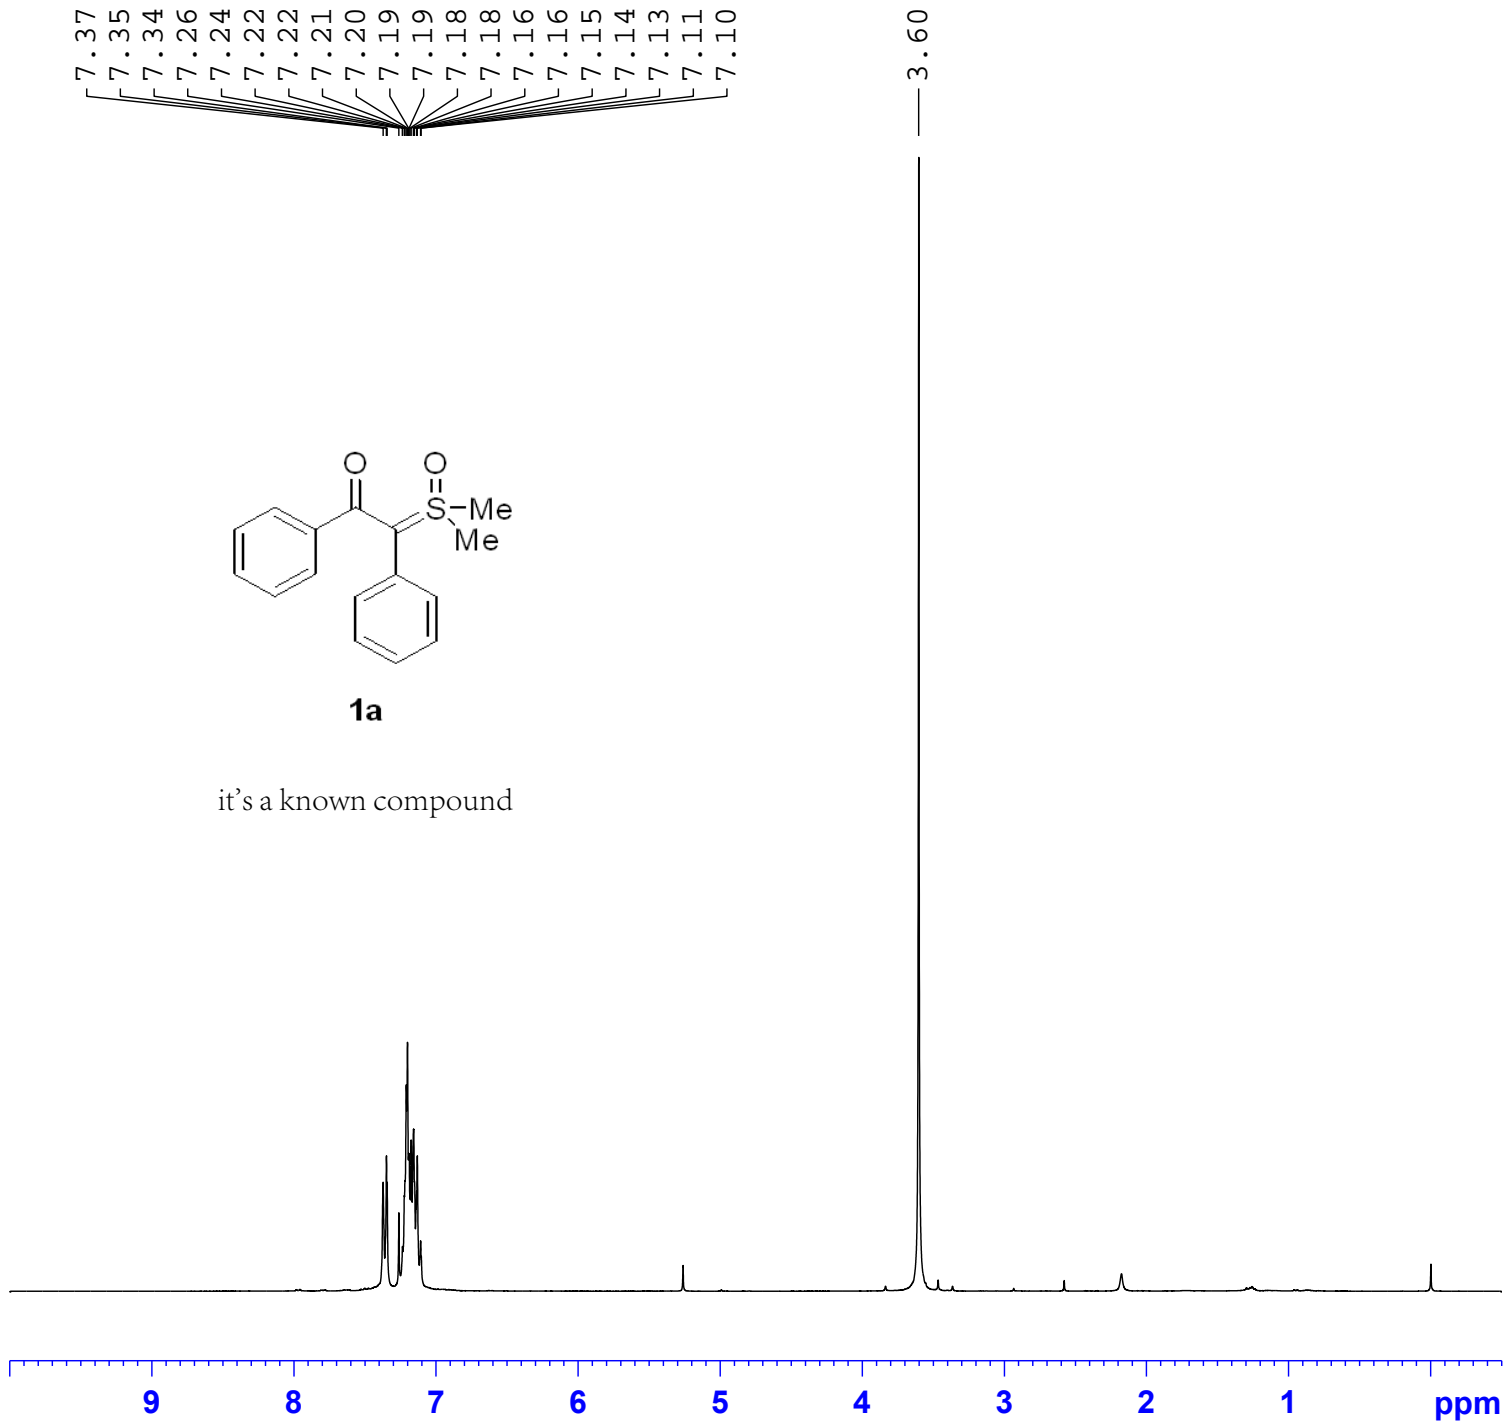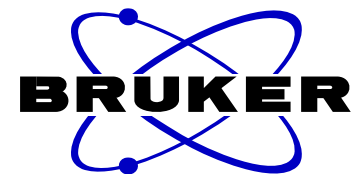

```

NAME          HNMR-gwg-1-2
EXPNO         2703
PROCNO        1
Date_         20210316
Time          9.30
INSTRUM       spect
PROBHD        5 mm PABBO BB-
PULPROG       zg30
TD            65536
SOLVENT       CDCl3
NS            16
DS            2
SWH           6009.615 Hz
FIDRES        0.091699 Hz
AQ            5.4526453 sec
RG            80.6
DW            83.200 usec
DE            6.50 usec
TE            291.1 K
D1            1.00000000 sec
TD0           1
  
```

```

===== CHANNEL f1 =====
SFO1          300.1318534 MHz
NUC1           1H
P1            10.00 usec
SI            65536
SF            300.1300065 MHz
WDW           EM
SSB           0
LB            0.30 Hz
GB            0
PC            1.00
  
```

7.41  
7.40  
7.39  
7.39  
7.33  
7.33  
7.33  
7.32  
7.31  
7.31  
7.30  
7.29  
7.29  
7.26  
7.26  
7.25  
7.24  
7.24  
7.23  
7.22  
7.22  
7.21  
7.21  
7.18  
7.18  
7.17  
7.16  
7.15  
7.14  
7.14  
3.66

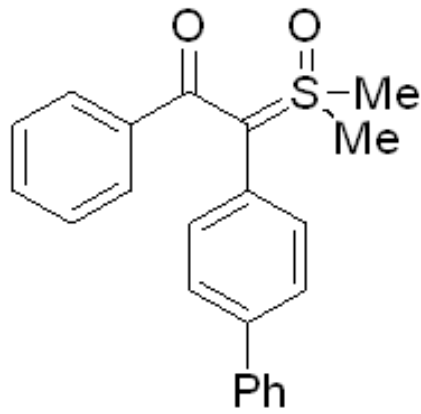

1b

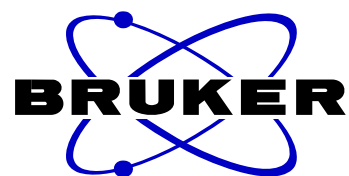

```

NAME      HNMR-gwg-1-37
EXPNO     85
PROCNO    1
Date_     20210401
Time      14.41
INSTRUM   spect
PROBHD    5 mm PABBO BB-
PULPROG   zg30
TD        65536
SOLVENT   CDCl3
NS        6
DS        2
SWH       8223.685 Hz
FIDRES    0.125483 Hz
AQ        3.9846387 sec
RG        100.49
DW        60.800 usec
DE        6.50 usec
TE        293.8 K
D1        1.00000000 sec
TD0       1
  
```

```

===== CHANNEL f1 =====
NUC1      1H
P1        14.40 usec
SI        65536
SF        400.1900182 MHz
WDW       EM
SSB       0
LB        0.30 Hz
GB        0
PC        1.00
  
```

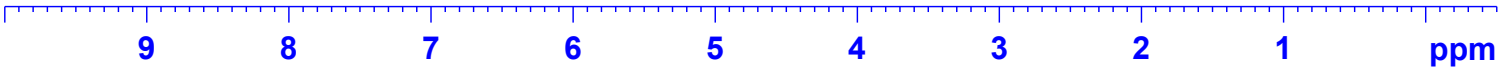

2.01  
2.04  
4.02  
1.04  
3.15  
2.00

6.00

S-148

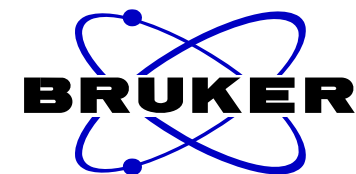

NAME CNMR-gwg-1-37  
EXPNO 86  
PROCNO 1  
Date\_ 20210401  
Time 14.47  
INSTRUM spect  
PROBHD 5 mm PABBO BB-  
PULPROG zgpg30  
TD 65536  
SOLVENT CDCl3  
NS 62  
DS 4  
SWH 24038.461 Hz  
FIDRES 0.366798 Hz  
AQ 1.3631988 sec  
RG 193.13  
DW 20.800 usec  
DE 6.50 usec  
TE 294.4 K  
D1 2.00000000 sec  
D11 0.03000000 sec  
TD0 1

==== CHANNEL f1 =====  
NUC1 13C  
P1 9.90 usec  
SI 32768  
SF 100.6278560 MHz  
WDW EM  
SSB 0  
LB 1.00 Hz  
GB 0  
PC 1.40

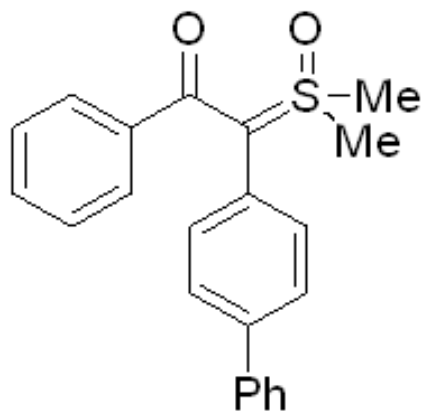

1b

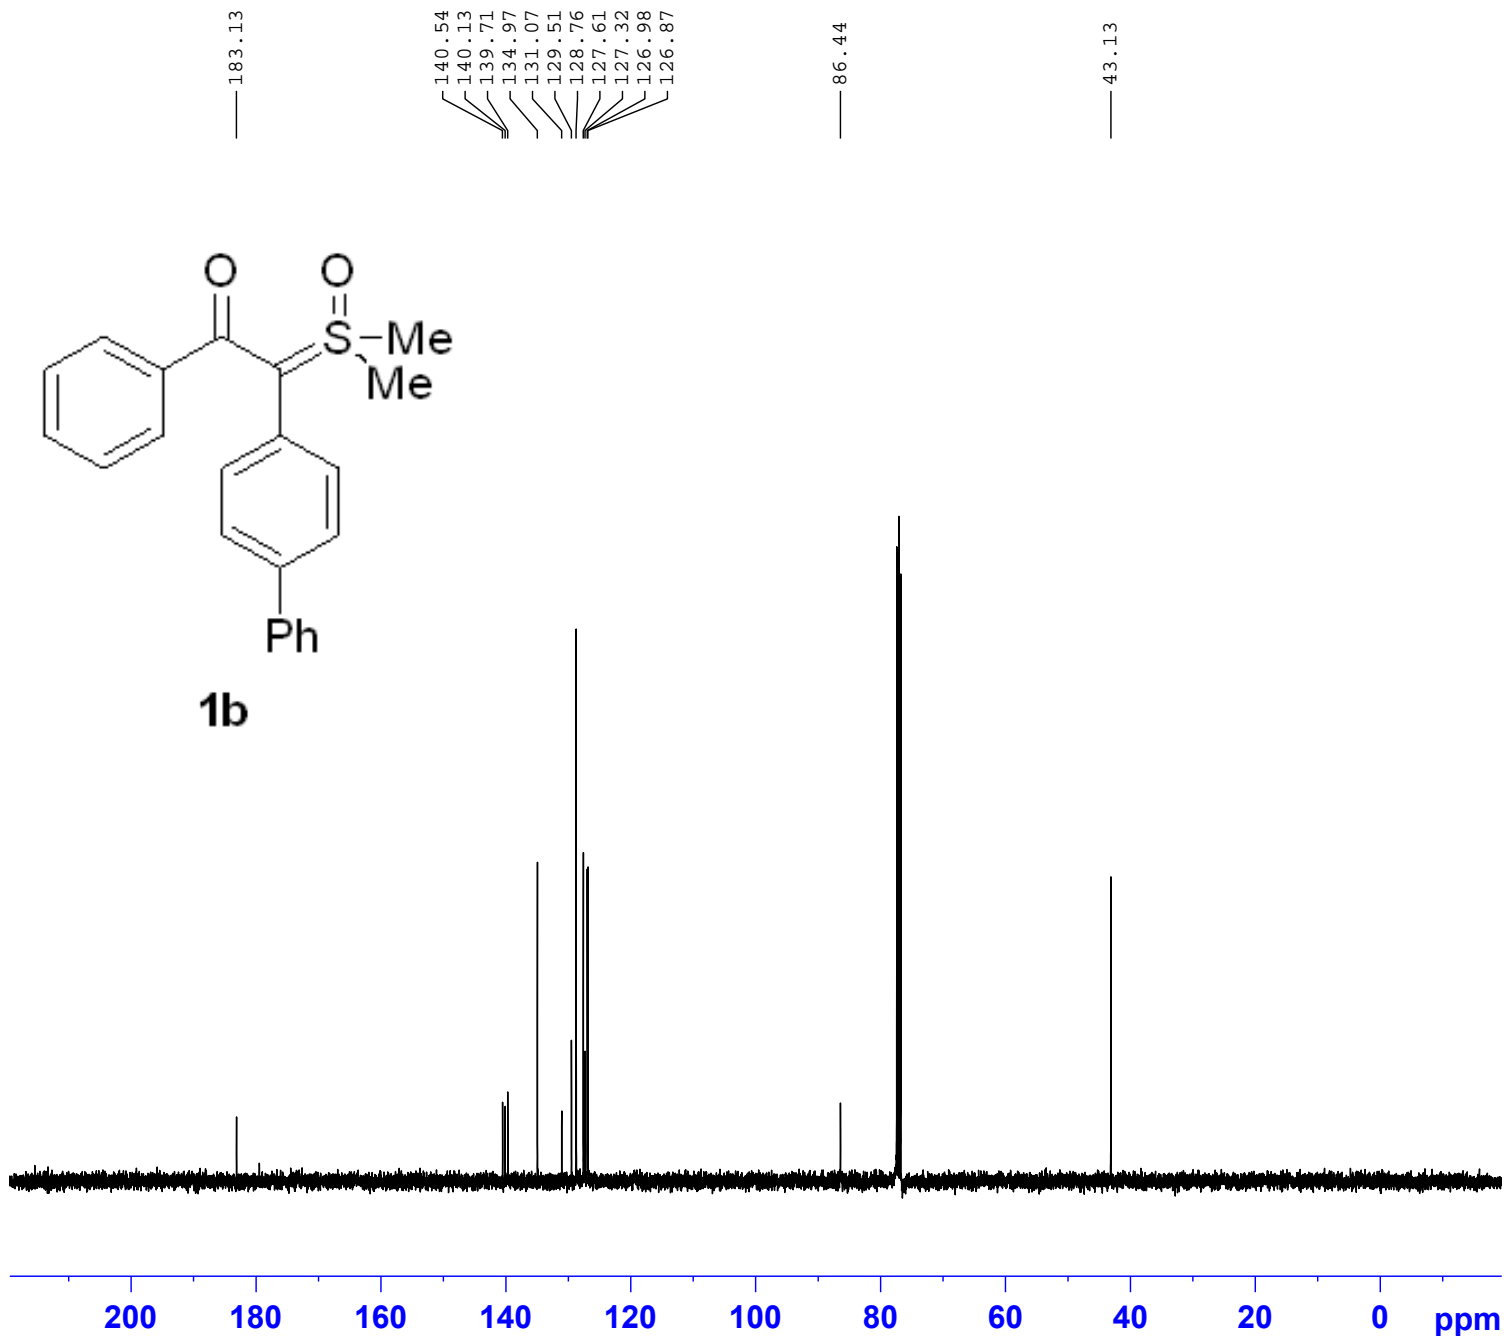

7.51  
7.50  
7.49  
7.49  
7.38  
7.36  
7.35  
7.34  
7.33  
7.32  
7.32  
7.27  
7.26  
7.25  
7.23  
7.19  
7.17  
7.15  
7.14  
7.12

— 3.64

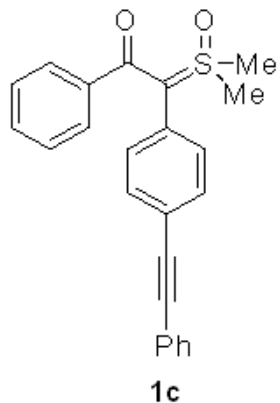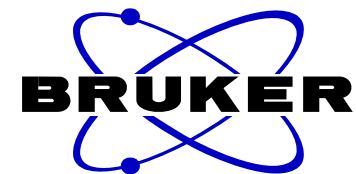

NAME HNMR-gwg-wm-1-29  
EXPNO 117  
PROCNO 1  
Date\_ 20210412  
Time 14.34  
INSTRUM spect  
PROBHD 5 mm PABBO BB-  
PULPROG zg30  
TD 65536  
SOLVENT CDCl3  
NS 6  
DS 2  
SWH 8223.685 Hz  
FIDRES 0.125483 Hz  
AQ 3.9846387 sec  
RG 140.02  
DW 60.800 usec  
DE 6.50 usec  
TE 293.7 K  
D1 1.00000000 sec  
TD0 1

==== CHANNEL f1 =====  
NUC1 1H  
P1 14.40 usec  
SI 65536  
SF 400.1900163 MHz  
WDW EM  
SSB 0  
LB 0.30 Hz  
GB 0  
PC 1.00

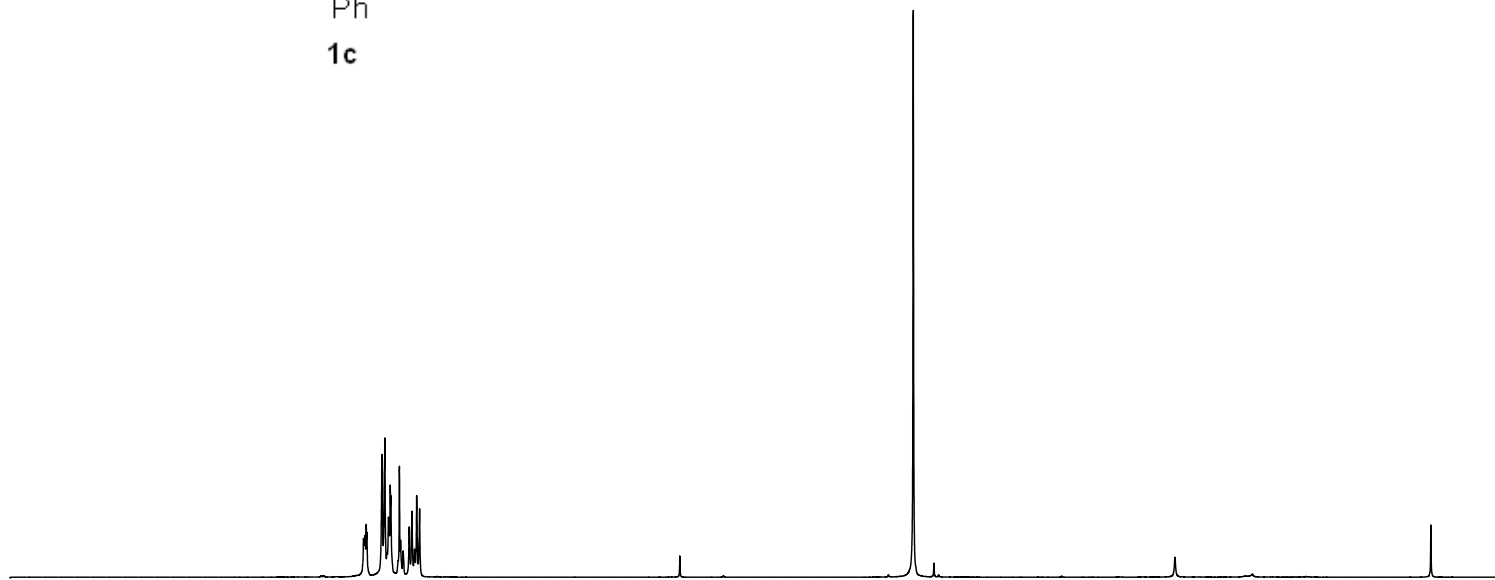

9 8 7 6 5 4 3 2 1 ppm

2.08  
4.12  
2.94  
1.08  
4.03

6.00

S-150

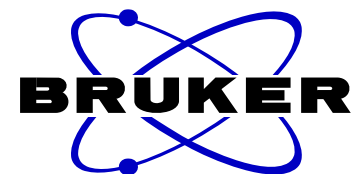

NAME CNMR-gwg-wm-1-29  
EXPNO 118  
PROCNO 1  
Date\_ 20210412  
Time 14.37  
INSTRUM spect  
PROBHD 5 mm PABBO BB-  
PULPROG zgpg30  
TD 65536  
SOLVENT CDCl3  
NS 53  
DS 4  
SWH 24038.461 Hz  
FIDRES 0.366798 Hz  
AQ 1.3631988 sec  
RG 193.13  
DW 20.800 usec  
DE 6.50 usec  
TE 294.2 K  
D1 2.00000000 sec  
D11 0.03000000 sec  
TD0 1

==== CHANNEL f1 =====  
NUC1 13C  
P1 9.90 usec  
SI 32768  
SF 100.6278560 MHz  
WDW EM  
SSB 0  
LB 1.00 Hz  
GB 0  
PC 1.40

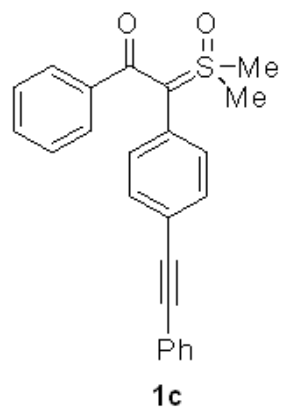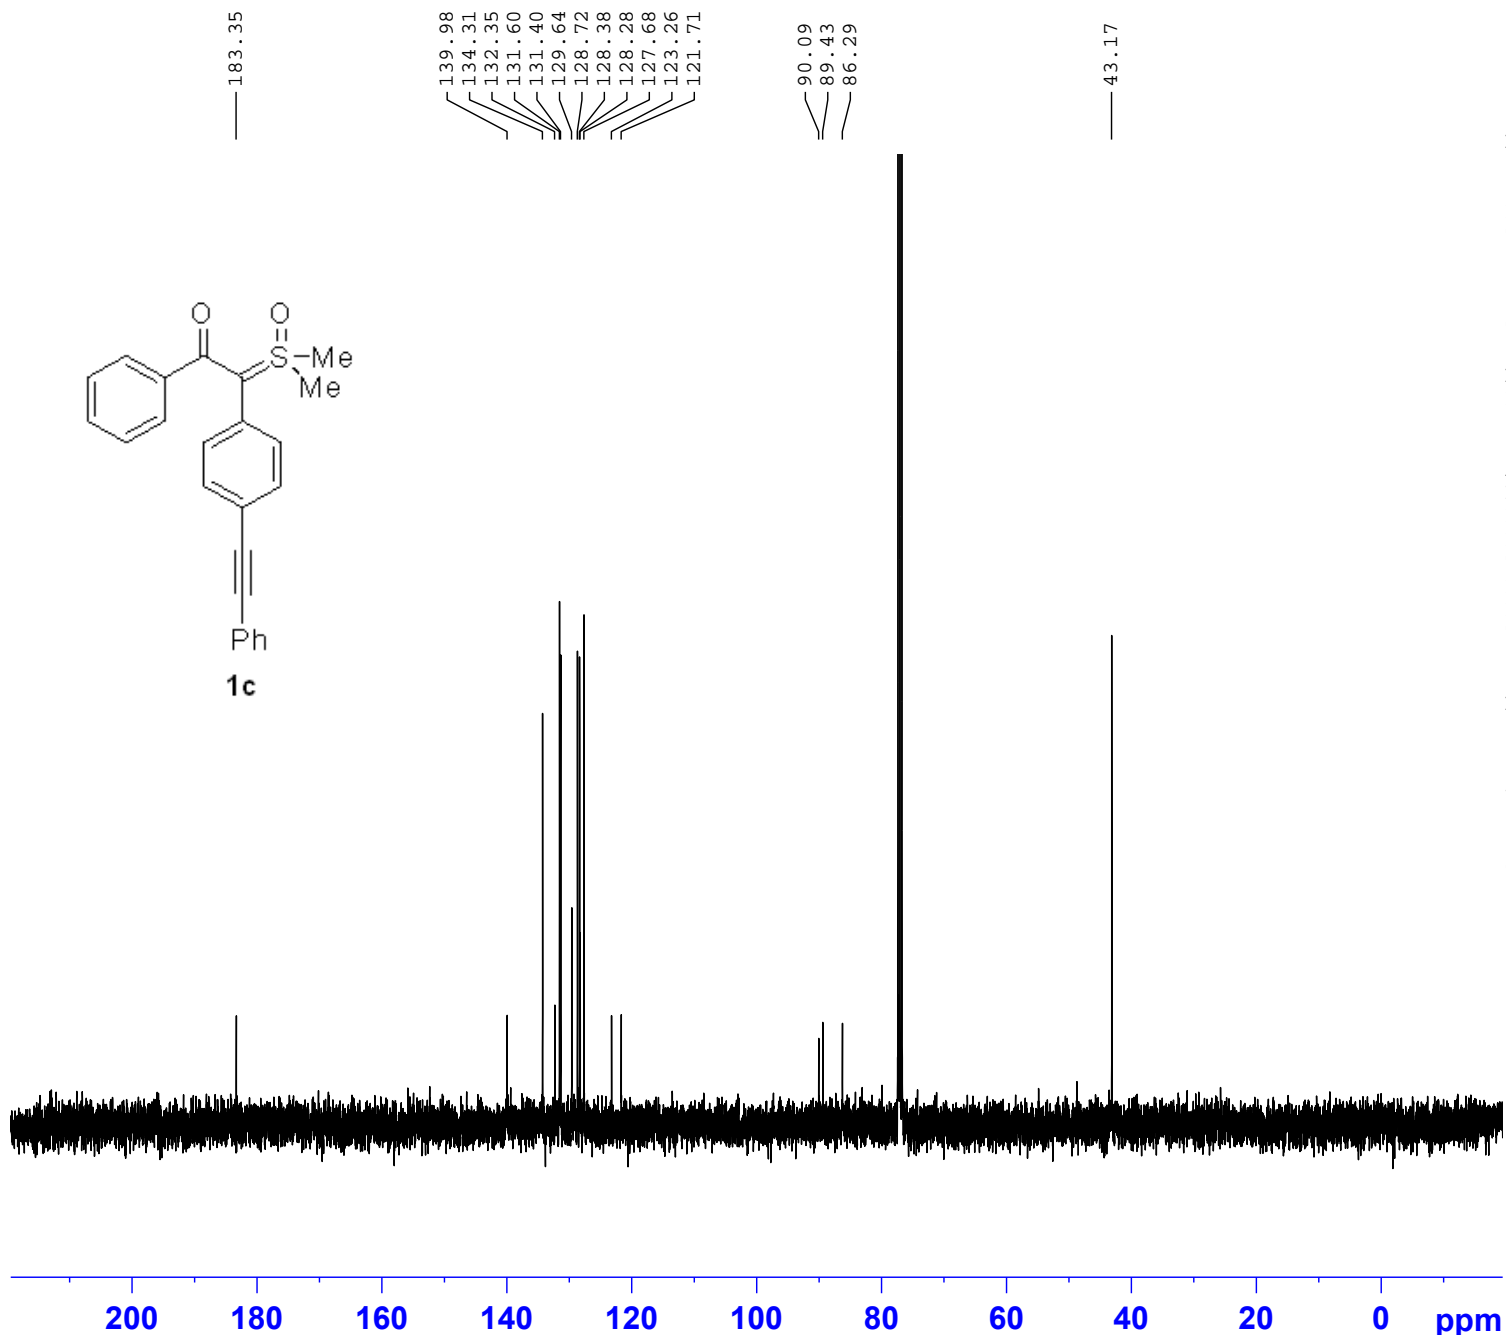

7.43  
7.41  
7.30  
7.30  
7.28  
7.28  
7.26  
7.24  
7.24  
7.21  
7.19  
7.17  
7.11  
7.09  
7.08  
7.06

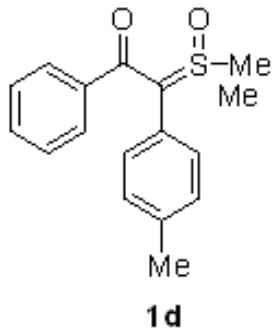

3.66

2.34

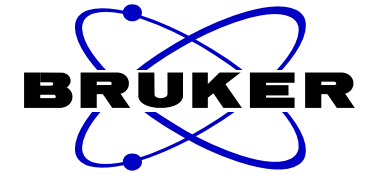

NAME HNMR-gwg-1-16  
EXPNO 21  
PROCNO 1  
Date\_ 20210322  
Time 15.26  
INSTRUM spect  
PROBHD 5 mm PABBO BB-  
PULPROG zg30  
TD 65536  
SOLVENT CDCl3  
NS 6  
DS 2  
SWH 8223.685 Hz  
FIDRES 0.125483 Hz  
AQ 3.9846387 sec  
RG 140.02  
DW 60.800 usec  
DE 6.50 usec  
TE 293.8 K  
D1 1.00000000 sec  
TD0 1

==== CHANNEL f1 =====  
NUC1 1H  
P1 14.40 usec  
SI 65536  
SF 400.1900000 MHz  
WDW EM  
SSB 0  
LB 0.30 Hz  
GB 0  
PC 1.00

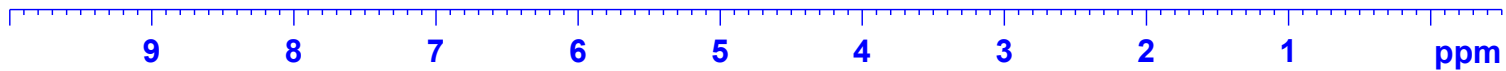

2.16  
1.09  
1.96  
3.90

5.98

S-152

3.00



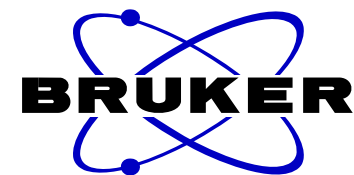

NAME CNMR-gwg-1-16  
EXPNO 23  
PROCNO 1  
Date\_ 20210323  
Time 15.03  
INSTRUM spect  
PROBHD 5 mm PABBO BB-  
PULPROG zgpg30  
TD 65536  
SOLVENT CDCl3  
NS 35  
DS 4  
SWH 24038.461 Hz  
FIDRES 0.366798 Hz  
AQ 1.3631988 sec  
RG 193.13  
DW 20.800 usec  
DE 6.50 usec  
TE 294.1 K  
D1 2.00000000 sec  
D11 0.03000000 sec  
TD0 1

==== CHANNEL f1 =====  
NUC1 13C  
P1 9.90 usec  
SI 32768  
SF 100.6278560 MHz  
WDW EM  
SSB 0  
LB 1.00 Hz  
GB 0  
PC 1.40

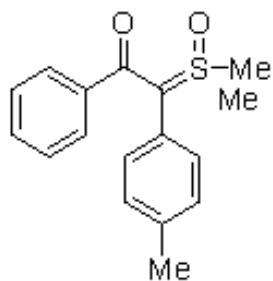

1d

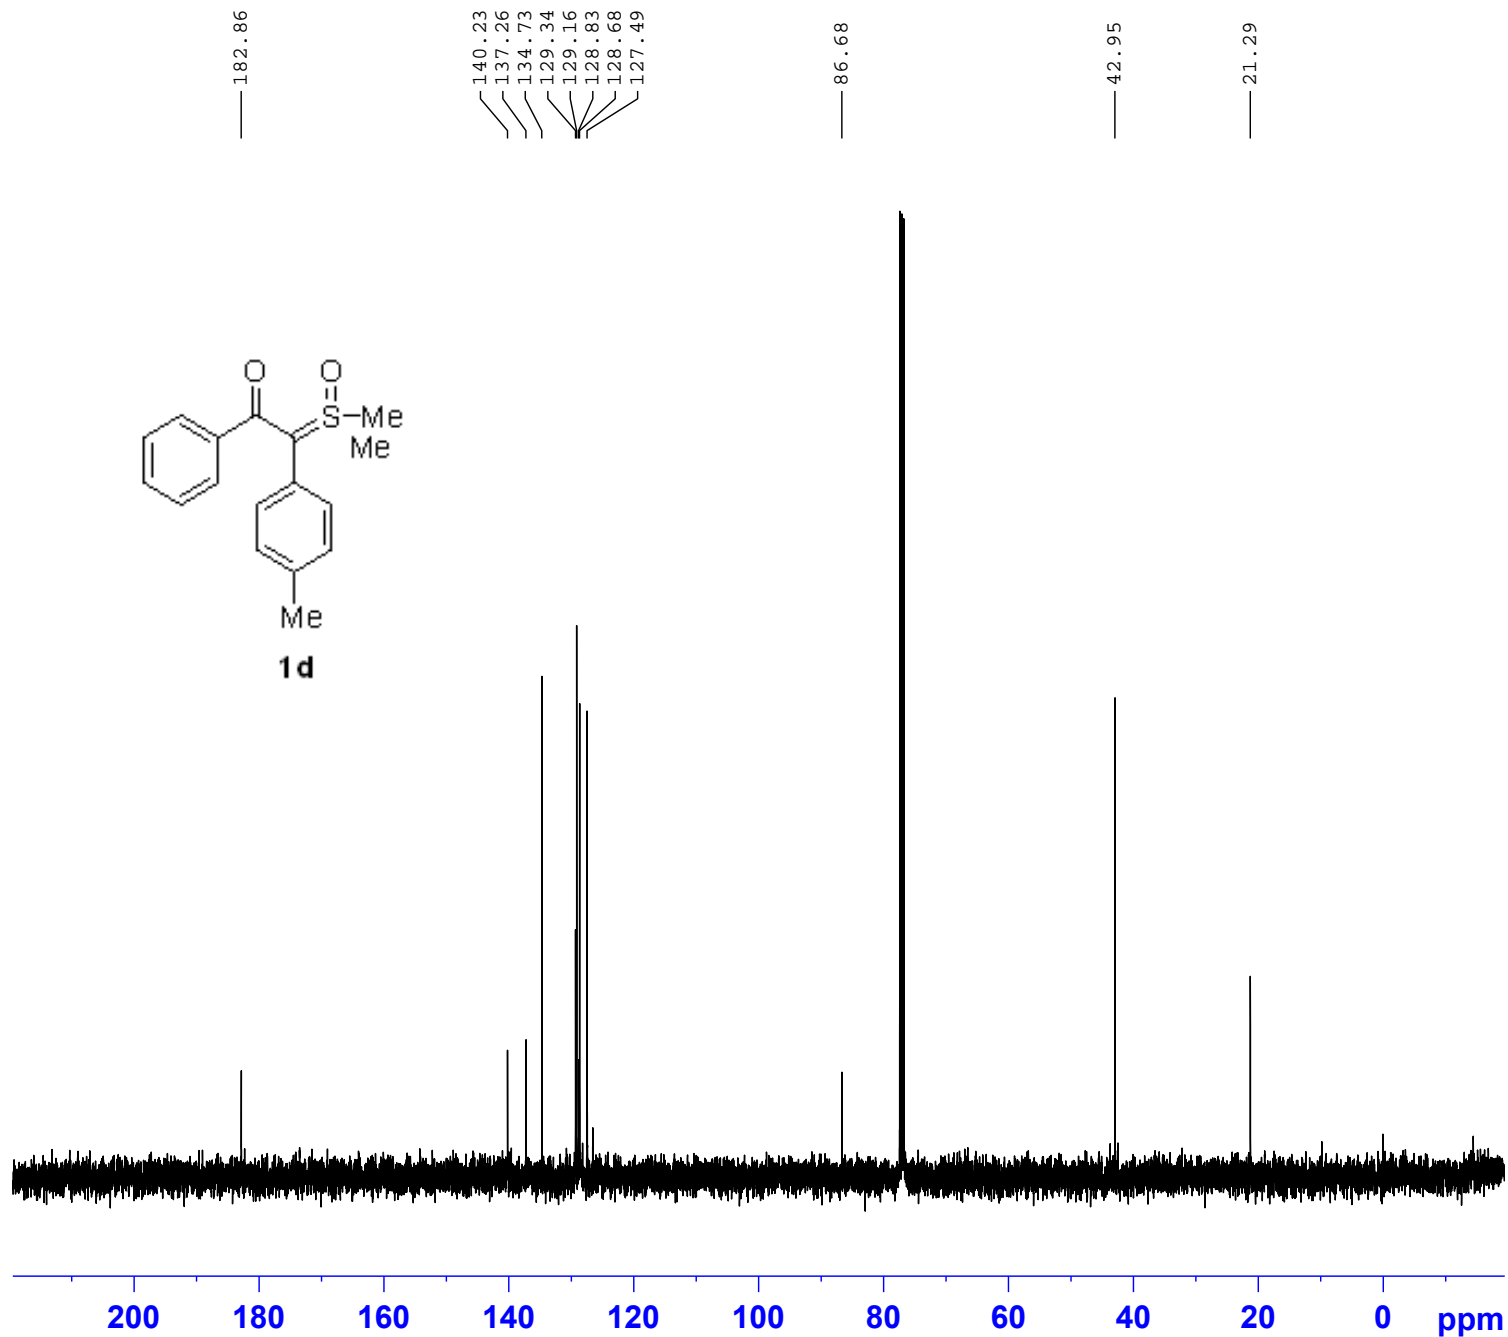

7.40  
7.40  
7.39  
7.38  
7.38  
7.26  
7.24  
7.23  
7.23  
7.22  
7.22  
7.21  
7.20  
7.20  
7.19  
7.16  
7.16  
7.15  
7.14  
7.13  
7.13  
7.12  
6.86  
6.80

— 3.61

— 2.21

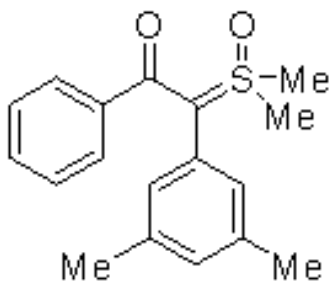

1e



NAME HNMR-gwg-3-22  
EXPNO 58  
PROCNO 1  
Date\_ 20210624  
Time 14.39  
INSTRUM spect  
PROBHD 5 mm PABBO BB-  
PULPROG zg30  
TD 65536  
SOLVENT CDCl3  
NS 6  
DS 2  
SWH 8223.685 Hz  
FIDRES 0.125483 Hz  
AQ 3.9846387 sec  
RG 100.49  
DW 60.800 usec  
DE 6.50 usec  
TE 295.0 K  
D1 1.00000000 sec  
TD0 1

==== CHANNEL f1 =====  
NUC1 1H  
P1 14.40 usec  
SI 65536  
SF 400.1900156 MHz  
WDW EM  
SSB 0  
LB 0.30 Hz  
GB 0  
PC 1.00

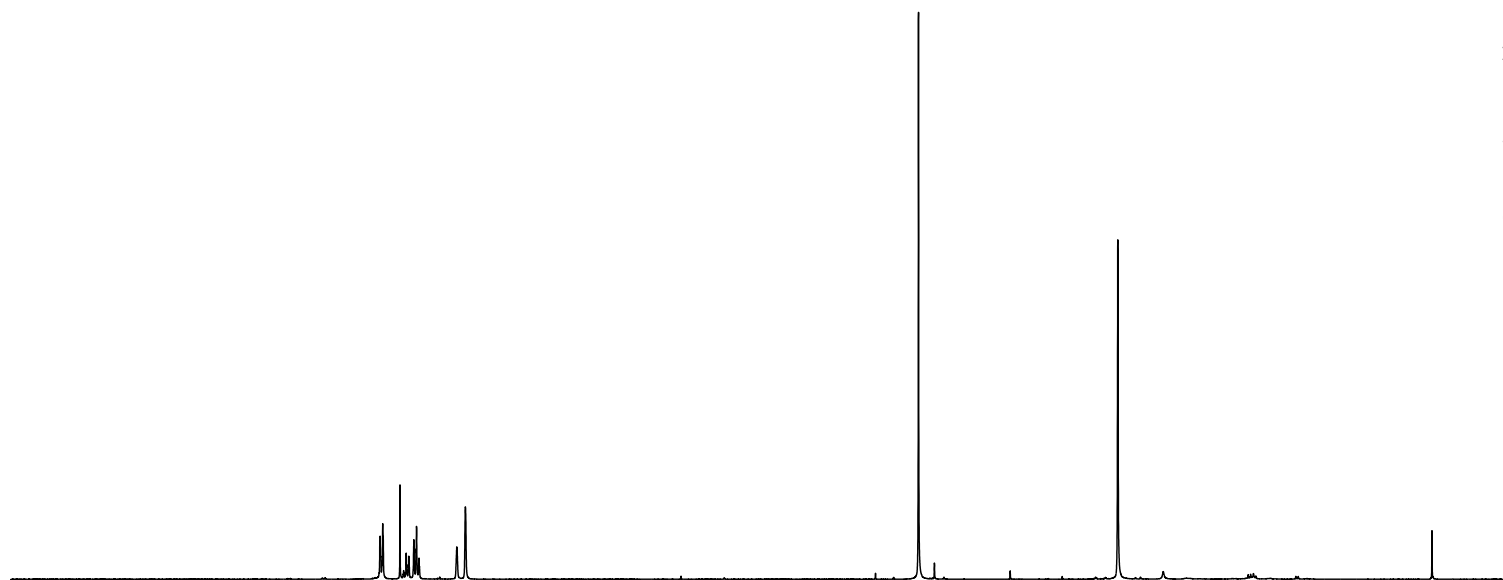

9 8 7 6 5 4 3 2 1 ppm

2.16  
1.06  
2.07  
1.00  
1.95

6.03

S-154

6.07



NAME CNMR-gwg-3-22  
EXPNO 4286  
PROCNO 1  
Date\_ 20210625  
Time 11.26  
INSTRUM spect  
PROBHD 5 mm PABBO BB-  
PULPROG zgpg30  
TD 65536  
SOLVENT CDCl3  
NS 600  
DS 4  
SWH 18028.846 Hz  
FIDRES 0.275098 Hz  
AQ 1.8175818 sec  
RG 203  
DW 27.733 usec  
DE 6.50 usec  
TE 296.2 K  
D1 2.00000000 sec  
D11 0.03000000 sec  
TD0 1

==== CHANNEL f1 =====  
SFO1 75.4752949 MHz  
NUC1 13C  
P1 9.50 usec  
SI 32768  
SF 75.4677485 MHz  
WDW EM  
SSB 0  
LB 1.00 Hz  
GB 0  
PC 1.40

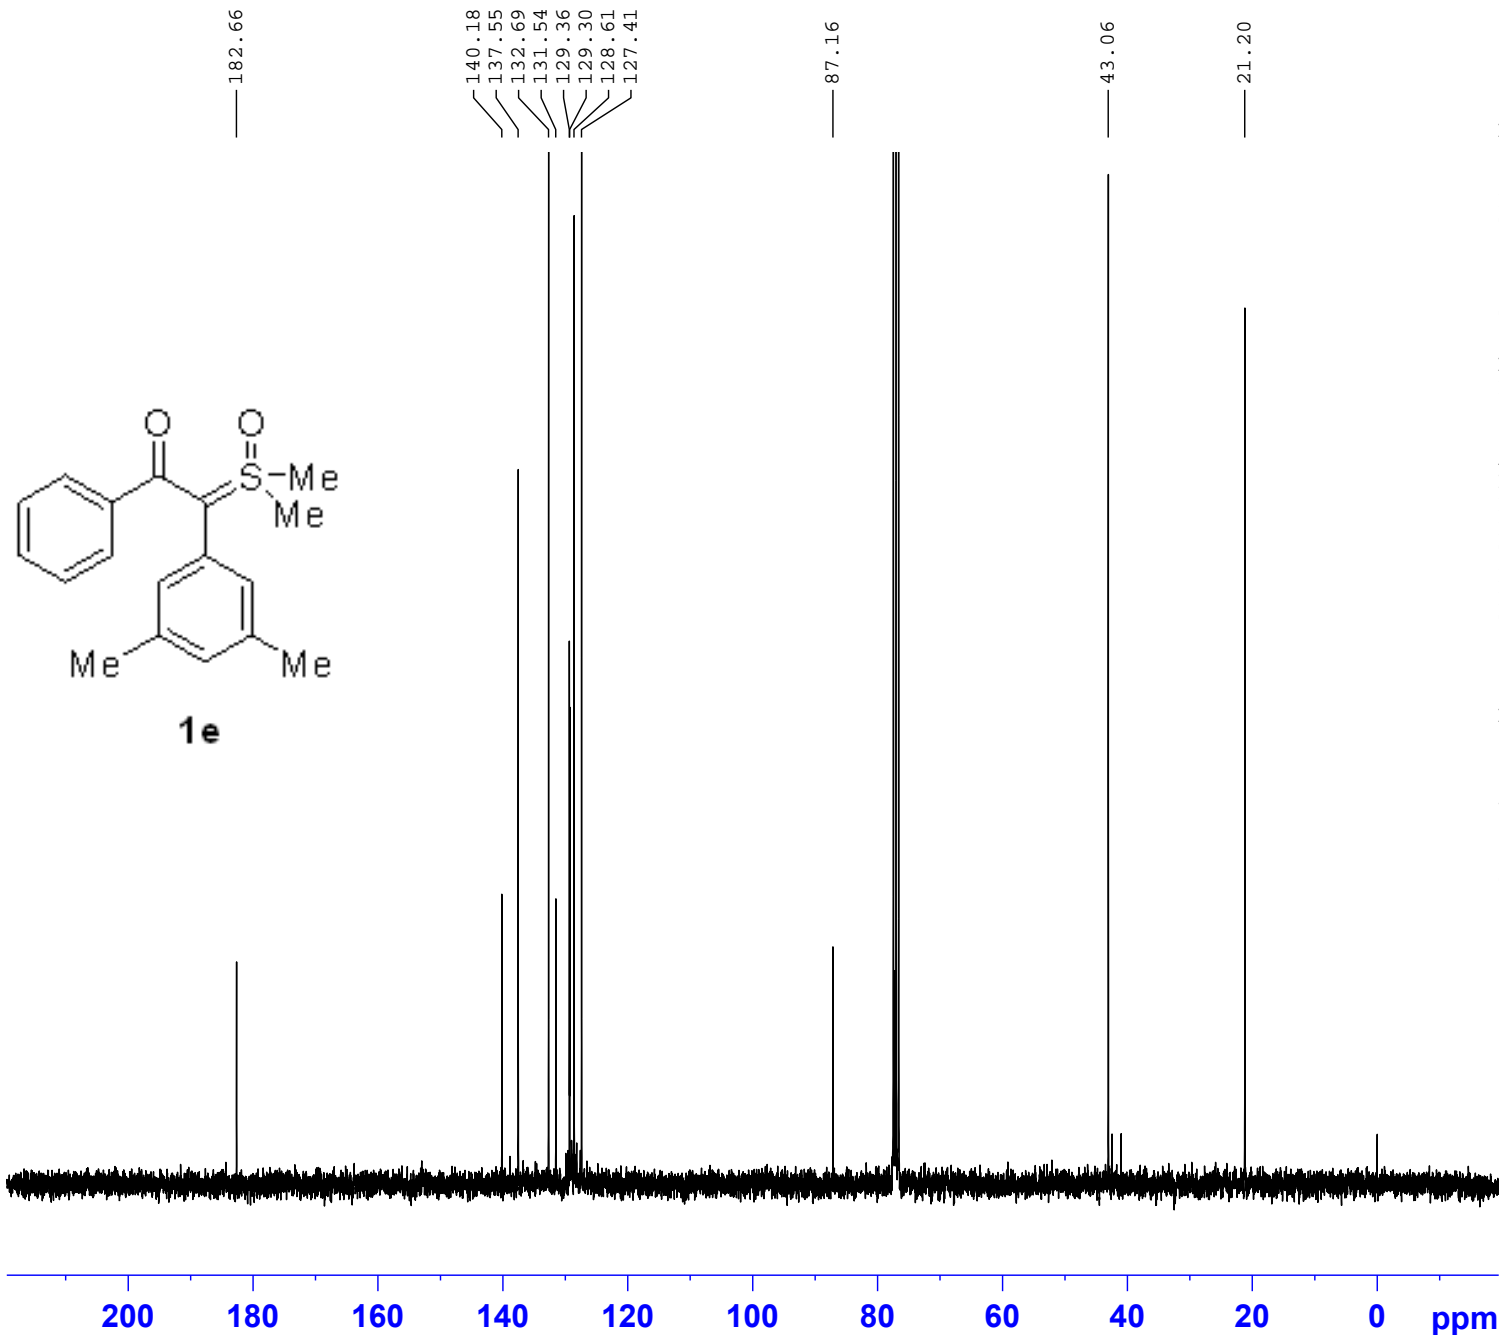

7.26  
7.25  
7.24  
7.24  
7.23  
7.22  
7.22  
7.18  
7.17  
7.16  
7.15  
7.14  
7.14  
7.13  
7.12  
7.11  
7.11  
7.10  
6.95  
6.94  
6.93  
6.92  
6.92  
6.91  
6.90  
6.89  
3.64

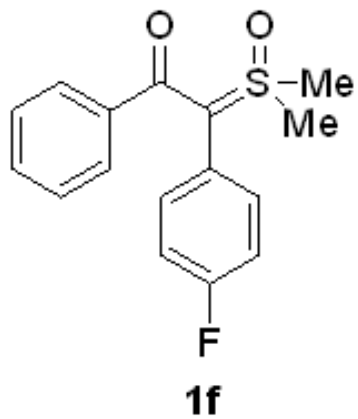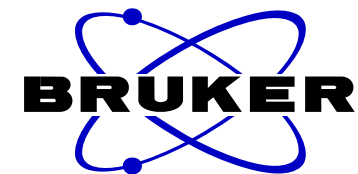

NAME HNMR-gwg-1-13  
EXPNO 20  
PROCNO 1  
Date\_ 20210322  
Time 15.24  
INSTRUM spect  
PROBHD 5 mm PABBO BB-  
PULPROG zg30  
TD 65536  
SOLVENT CDCl3  
NS 6  
DS 2  
SWH 8223.685 Hz  
FIDRES 0.125483 Hz  
AQ 3.9846387 sec  
RG 140.02  
DW 60.800 usec  
DE 6.50 usec  
TE 293.7 K  
D1 1.00000000 sec  
TD0 1

==== CHANNEL f1 =====  
NUC1 1H  
P1 14.40 usec  
SI 65536  
SF 400.1900138 MHz  
WDW EM  
SSB 0  
LB 0.30 Hz  
GB 0  
PC 1.00

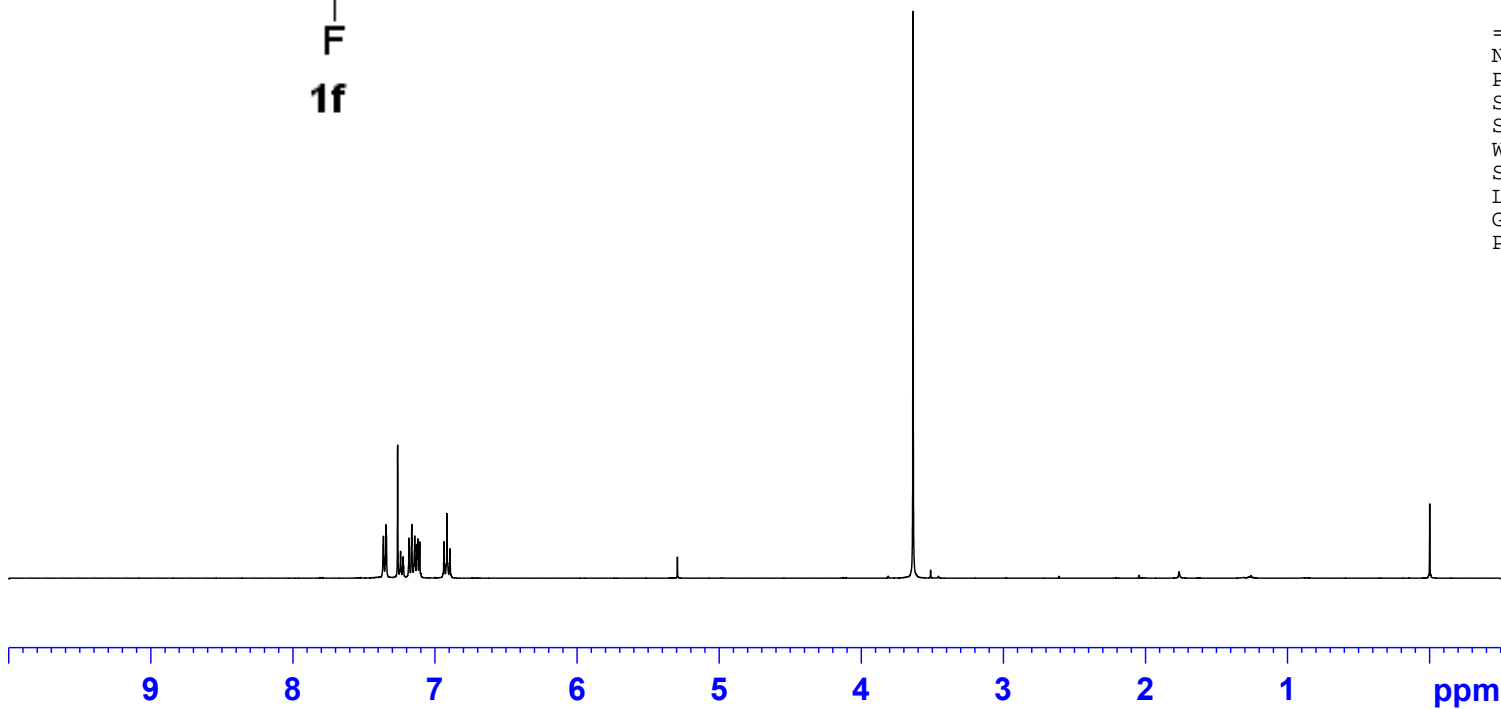

1.98  
0.92  
4.02  
1.98

6.00

S-156

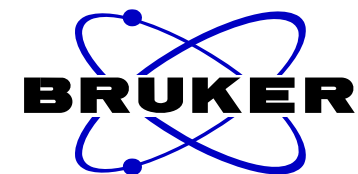

NAME CNMR-gwg-1-13  
EXPNO 22  
PROCNO 1  
Date\_ 20210323  
Time 14.59  
INSTRUM spect  
PROBHD 5 mm PABBO BB-  
PULPROG zgpg30  
TD 65536  
SOLVENT CDCl3  
NS 56  
DS 4  
SWH 24038.461 Hz  
FIDRES 0.366798 Hz  
AQ 1.3631988 sec  
RG 193.13  
DW 20.800 usec  
DE 6.50 usec  
TE 294.1 K  
D1 2.00000000 sec  
D11 0.03000000 sec  
TD0 1

==== CHANNEL f1 =====  
NUC1 13C  
P1 9.90 usec  
SI 32768  
SF 100.6278560 MHz  
WDW EM  
SSB 0  
LB 1.00 Hz  
GB 0  
PC 1.40

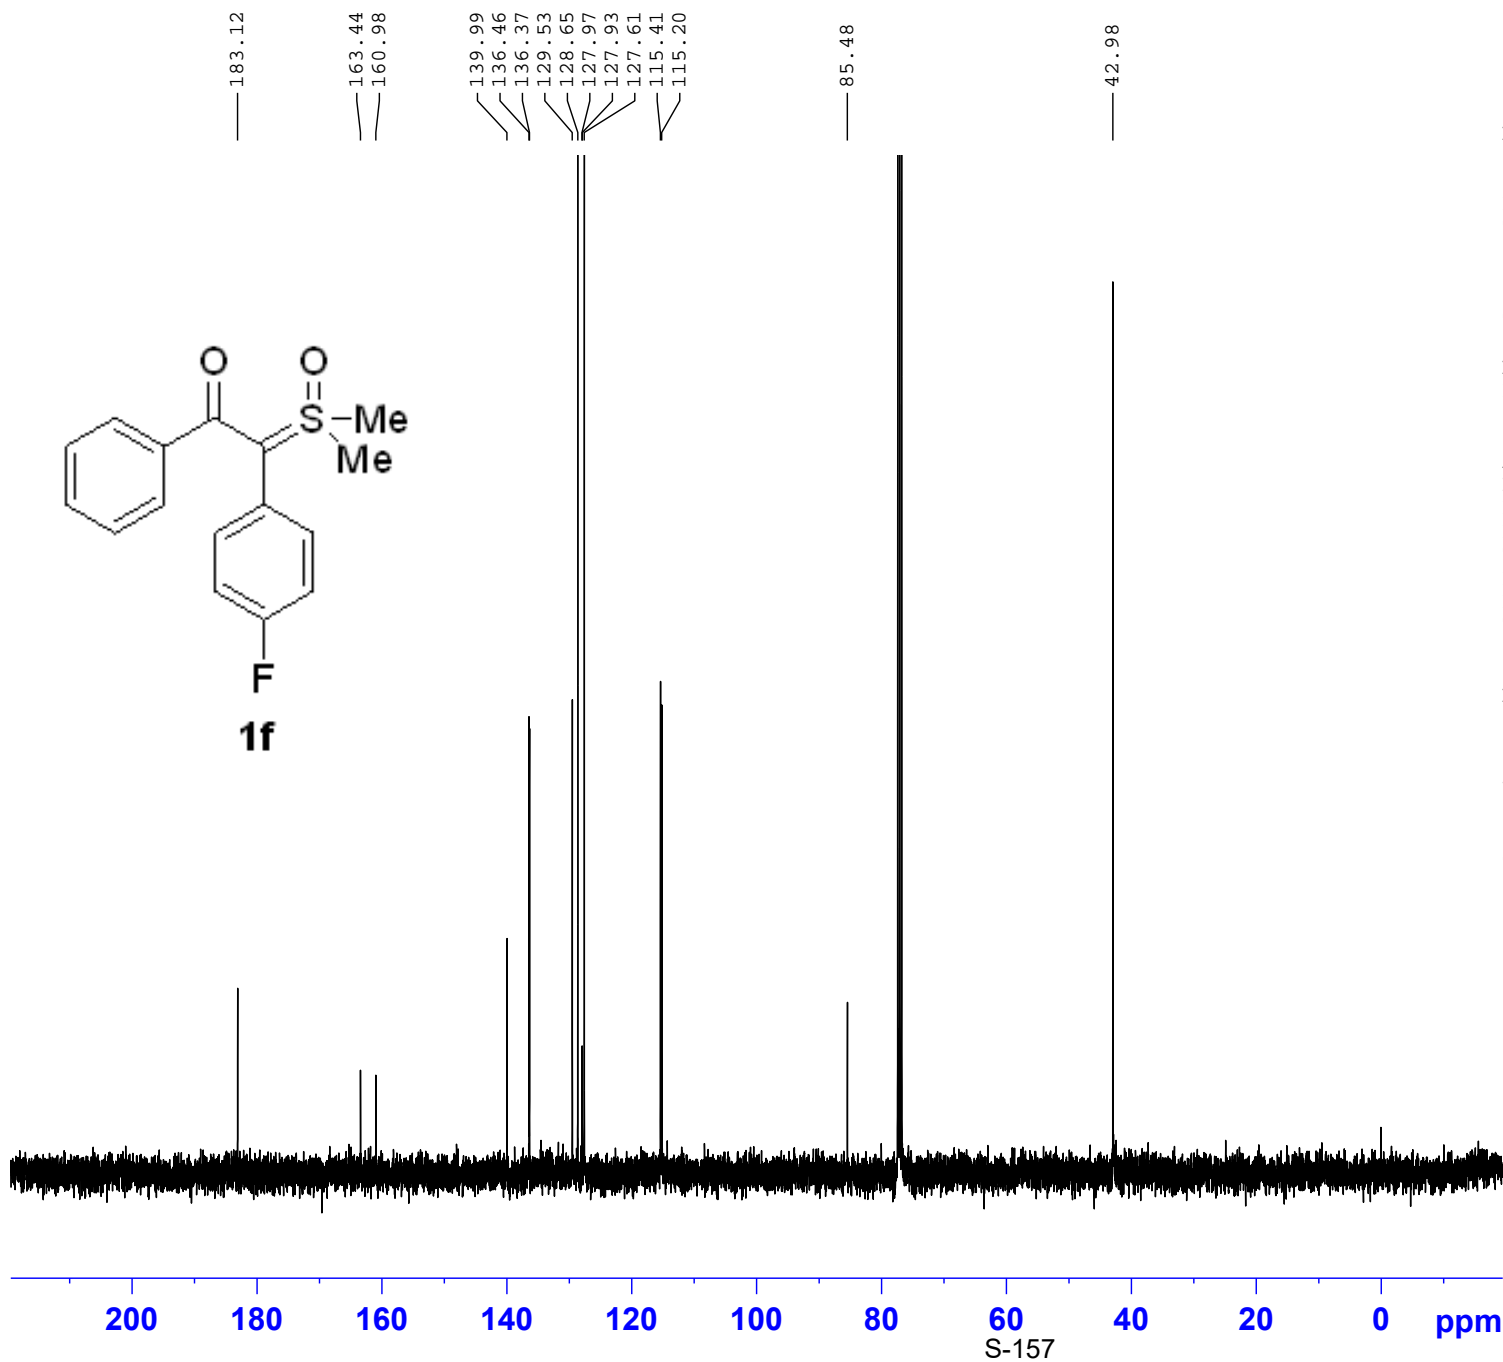

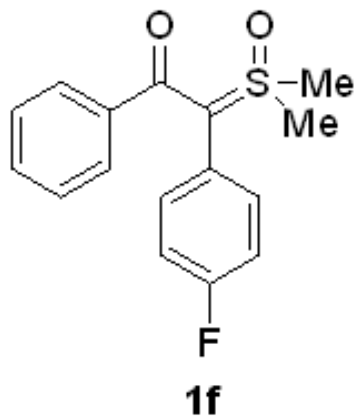

— -114.59

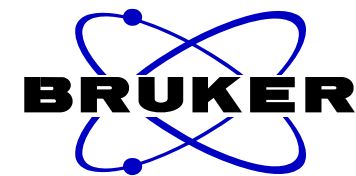

```

NAME          FNMN-gwg-1-13
EXPNO         2808
PROCNO        1
Date_         20210330
Time          10.48
INSTRUM       spect
PROBHD        5 mm PABBO BB-
PULPROG       zgfhigqn.2
TD            131072
SOLVENT       CDCl3
NS            16
DS            4
SWH           66964.289 Hz
FIDRES        0.510897 Hz
AQ            0.9787210 sec
RG            203
DW            7.467 usec
DE            6.50 usec
TE            296.2 K
D1            1.00000000 sec
D11           0.03000000 sec
D12           0.00002000 sec
TD0           1
  
```

```

===== CHANNEL f1 =====
SFO1         282.3761148 MHz
NUC1          19F
P1            14.50 usec
SI            65536
SF            282.4043552 MHz
WDW           EM
SSB           0
LB            0.30 Hz
GB            0
PC            1.00
  
```

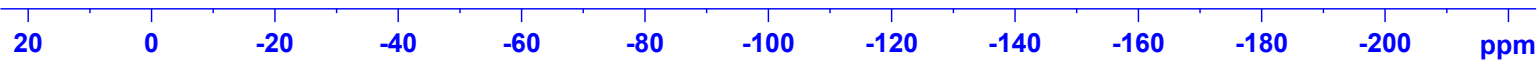

7.36  
7.34  
7.34  
7.27  
7.27  
7.26  
7.26  
7.25  
7.25  
7.24  
7.19  
7.17  
7.17  
7.16  
7.16  
7.09  
7.08  
7.08  
7.07  
7.06

— 3.63

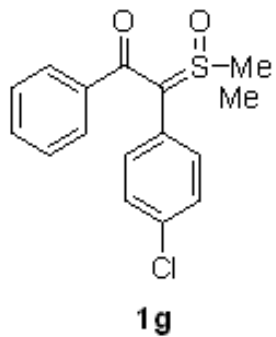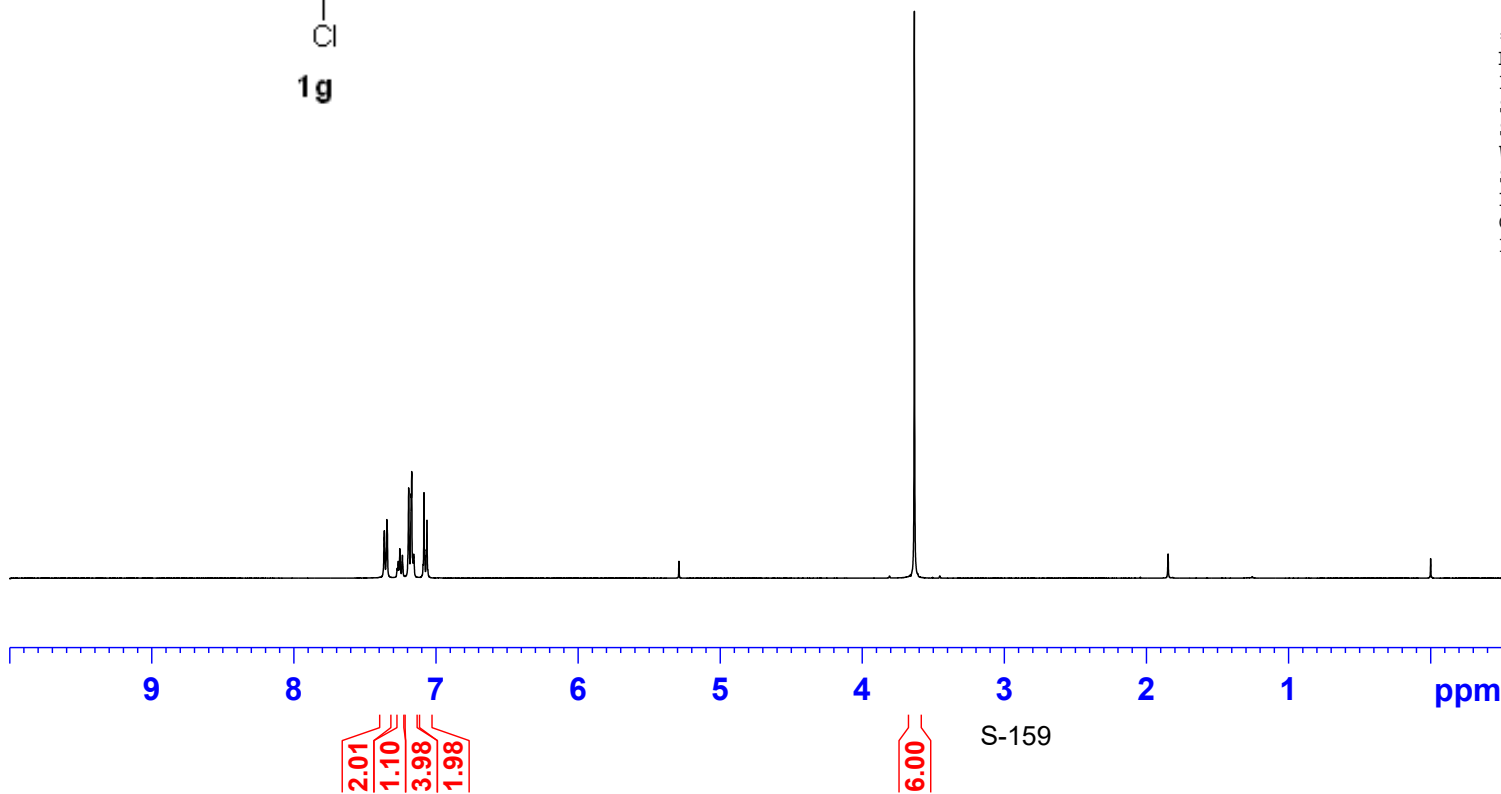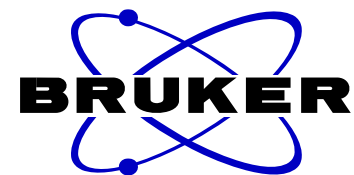

NAME HNMR-gwg-1-30  
EXPNO 59  
PROCNO 1  
Date\_ 20210329  
Time 14.41  
INSTRUM spect  
PROBHD 5 mm PABBO BB-  
PULPROG zg30  
TD 65536  
SOLVENT CDCl3  
NS 6  
DS 2  
SWH 8223.685 Hz  
FIDRES 0.125483 Hz  
AQ 3.9846387 sec  
RG 125.76  
DW 60.800 usec  
DE 6.50 usec  
TE 293.9 K  
D1 1.00000000 sec  
TD0 1

==== CHANNEL f1 =====  
NUC1 1H  
P1 14.40 usec  
SI 65536  
SF 400.1900136 MHz  
WDW EM  
SSB 0  
LB 0.30 Hz  
GB 0  
PC 1.00

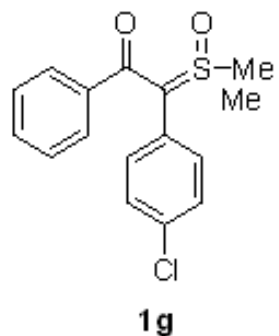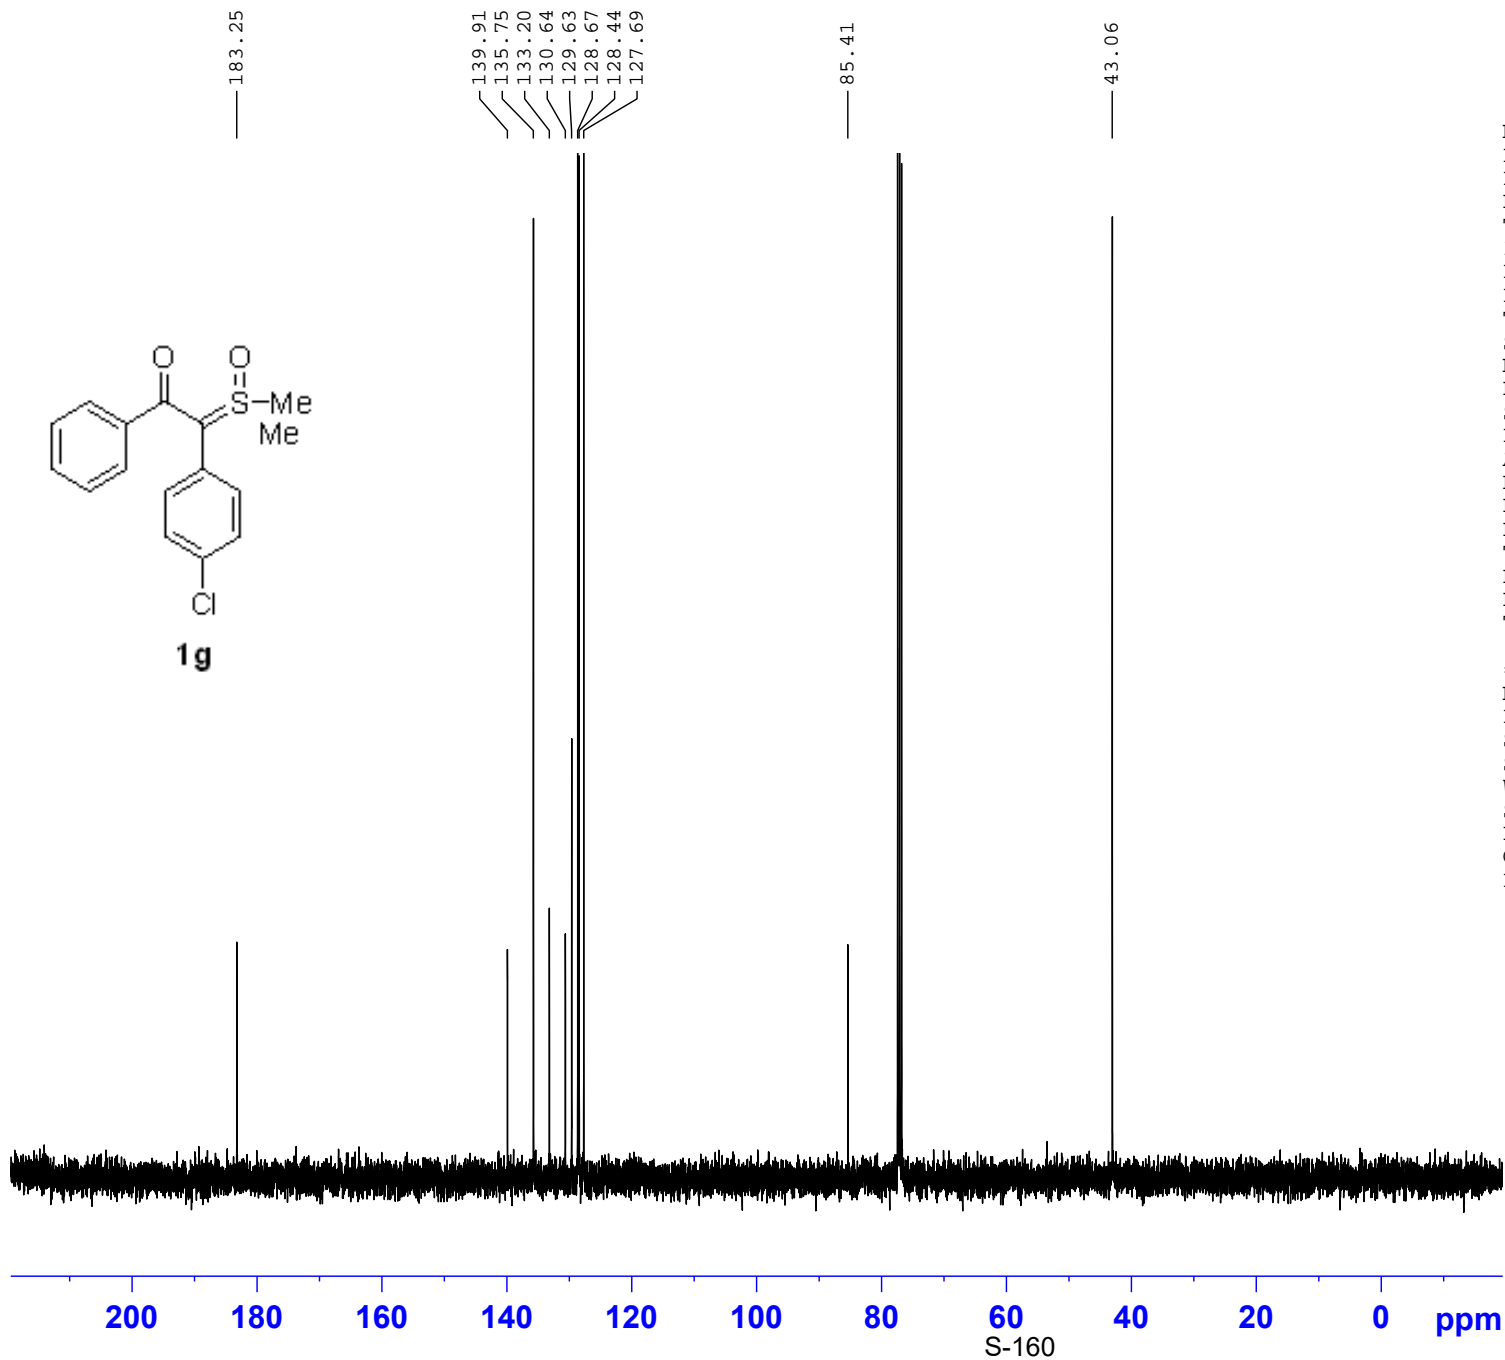

NAME CNMR-gwg-1-30  
EXPNO 69  
PROCNO 1  
Date\_ 20210330  
Time 14.39  
INSTRUM spect  
PROBHD 5 mm PABBO BB-  
PULPROG zgpg30  
TD 65536  
SOLVENT CDCl3  
NS 67  
DS 4  
SWH 24038.461 Hz  
FIDRES 0.366798 Hz  
AQ 1.3631988 sec  
RG 193.13  
DW 20.800 usec  
DE 6.50 usec  
TE 294.5 K  
D1 2.00000000 sec  
D11 0.03000000 sec  
TD0 1

===== CHANNEL f1 =====  
NUC1 13C  
P1 9.90 usec  
SI 32768  
SF 100.6278560 MHz  
WDW EM  
SSB 0  
LB 1.00 Hz  
GB 0  
PC 1.40



7.37  
7.36  
7.36  
7.34  
7.34  
7.32  
7.31  
7.28  
7.26  
7.24  
7.23  
7.20  
7.18  
7.15  
7.15  
7.02  
7.02  
7.00  
6.99

— 3.64

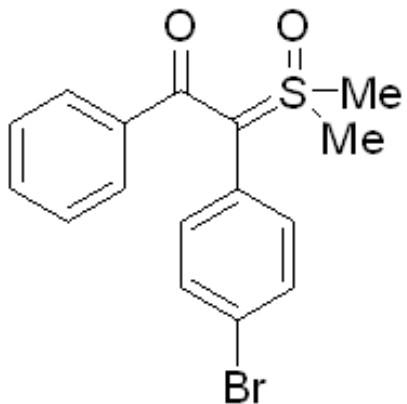

1h

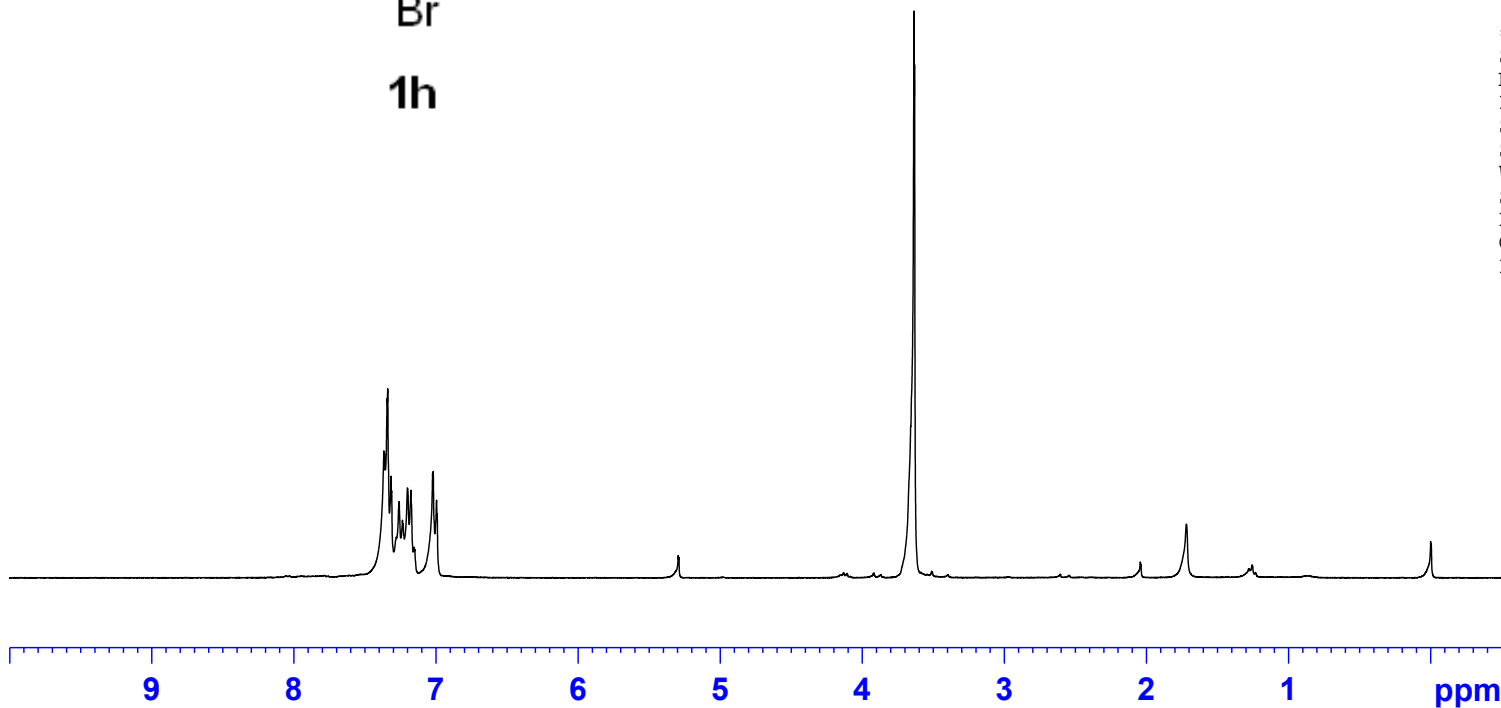

4.25  
3.34  
2.06

6.00

S-161

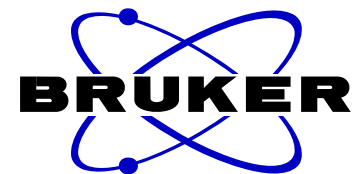

NAME HNMR-gwg-1-75  
EXPNO 3095  
PROCNO 1  
Date\_ 20210417  
Time 9.58  
INSTRUM spect  
PROBHD 5 mm PABBO BB-  
PULPROG zg30  
TD 65536  
SOLVENT CDCl3  
NS 16  
DS 2  
SWH 6009.615 Hz  
FIDRES 0.091699 Hz  
AQ 5.4526453 sec  
RG 203  
DW 83.200 usec  
DE 6.50 usec  
TE 296.2 K  
D1 1.00000000 sec  
TD0 1

==== CHANNEL f1 =====  
SFO1 300.1318534 MHz  
NUC1 1H  
P1 10.00 usec  
SI 65536  
SF 300.1300060 MHz  
WDW EM  
SSB 0  
LB 0.30 Hz  
GB 0  
PC 1.00



NAME CNMR-gwg-1-75  
EXPNO 3121  
PROCNO 1  
Date\_ 20210419  
Time 11.31  
INSTRUM spect  
PROBHD 5 mm PABBO BB-  
PULPROG zgpg30  
TD 65536  
SOLVENT CDCl3  
NS 1024  
DS 4  
SWH 18028.846 Hz  
FIDRES 0.275098 Hz  
AQ 1.8175818 sec  
RG 203  
DW 27.733 usec  
DE 6.50 usec  
TE 296.2 K  
D1 2.00000000 sec  
D11 0.03000000 sec  
TD0 1

==== CHANNEL f1 =====  
SFO1 75.4752949 MHz  
NUC1 13C  
P1 9.50 usec  
SI 32768  
SF 75.4677485 MHz  
WDW EM  
SSB 0  
LB 1.00 Hz  
GB 0  
PC 1.40

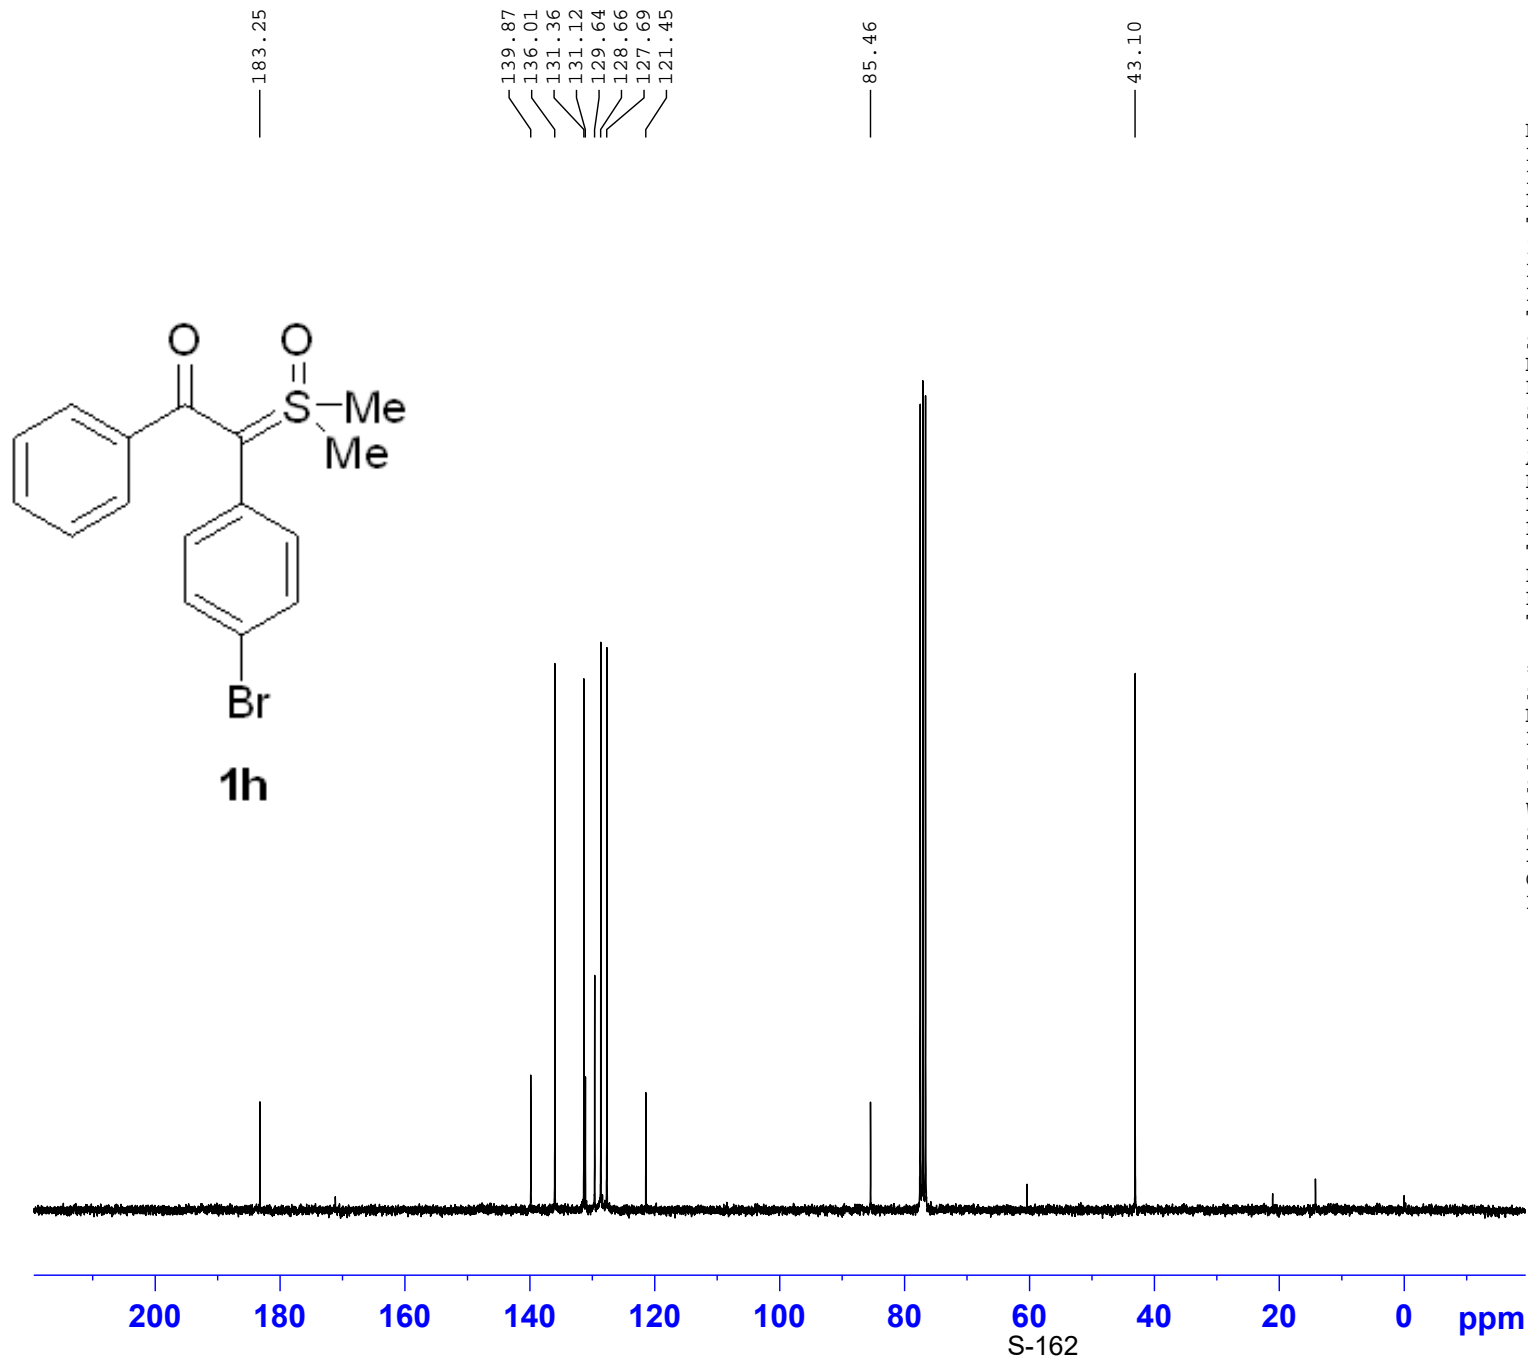

7.37  
7.37  
7.36  
7.36  
7.35  
7.34  
7.31  
7.31  
7.30  
7.29  
7.29  
7.28  
7.27  
7.27  
7.23  
7.21  
7.20  
7.19  
7.09  
7.09  
7.09  
7.08  
7.08  
7.07

— 3.67

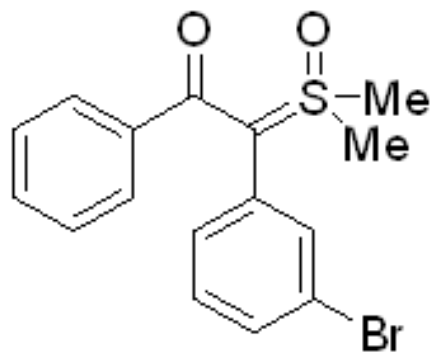

**1i**

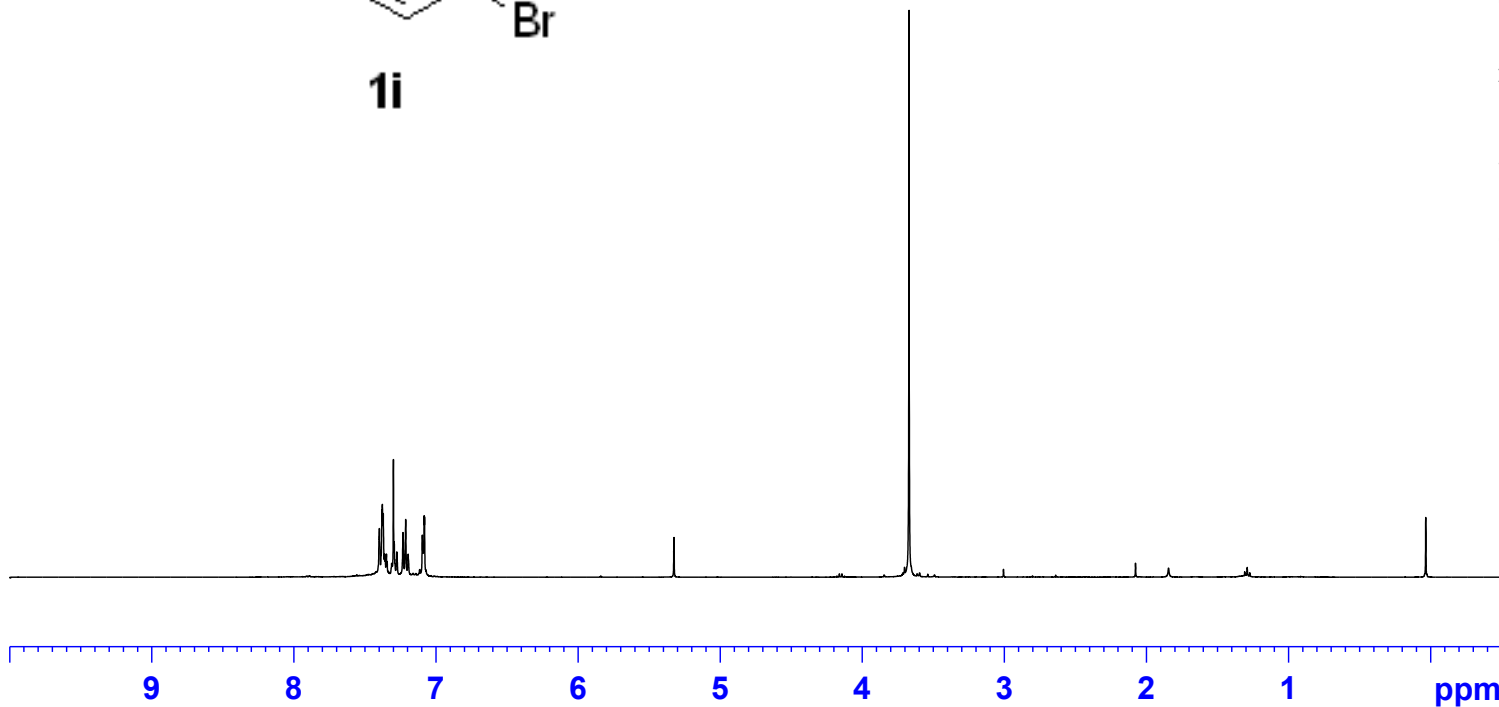

NAME HNMR-gwg-1-34  
EXPNO 63  
PROCNO 1  
Date\_ 20210330  
Time 14.14  
INSTRUM spect  
PROBHD 5 mm PABBO BB-  
PULPROG zg30  
TD 65536  
SOLVENT CDCl3  
NS 6  
DS 2  
SWH 8223.685 Hz  
FIDRES 0.125483 Hz  
AQ 3.9846387 sec  
RG 90.23  
DW 60.800 usec  
DE 6.50 usec  
TE 294.0 K  
D1 1.00000000 sec  
TD0 1

==== CHANNEL f1 =====  
NUC1 1H  
P1 14.40 usec  
SI 65536  
SF 400.1900000 MHz  
WDW EM  
SSB 0  
LB 0.30 Hz  
GB 0  
PC 1.00

4.04  
1.25  
2.18  
2.00

6.00

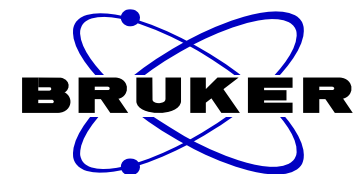

NAME CNMR-gwg-1-34  
EXPNO 78  
PROCNO 1  
Date\_ 20210331  
Time 14.41  
INSTRUM spect  
PROBHD 5 mm PABBO BB-  
PULPROG zgpg30  
TD 65536  
SOLVENT CDCl3  
NS 68  
DS 4  
SWH 24038.461 Hz  
FIDRES 0.366798 Hz  
AQ 1.3631988 sec  
RG 193.13  
DW 20.800 usec  
DE 6.50 usec  
TE 294.4 K  
D1 2.00000000 sec  
D11 0.03000000 sec  
TD0 1

==== CHANNEL f1 =====  
NUC1 13C  
P1 9.90 usec  
SI 32768  
SF 100.6278560 MHz  
WDW EM  
SSB 0  
LB 1.00 Hz  
GB 0  
PC 1.40

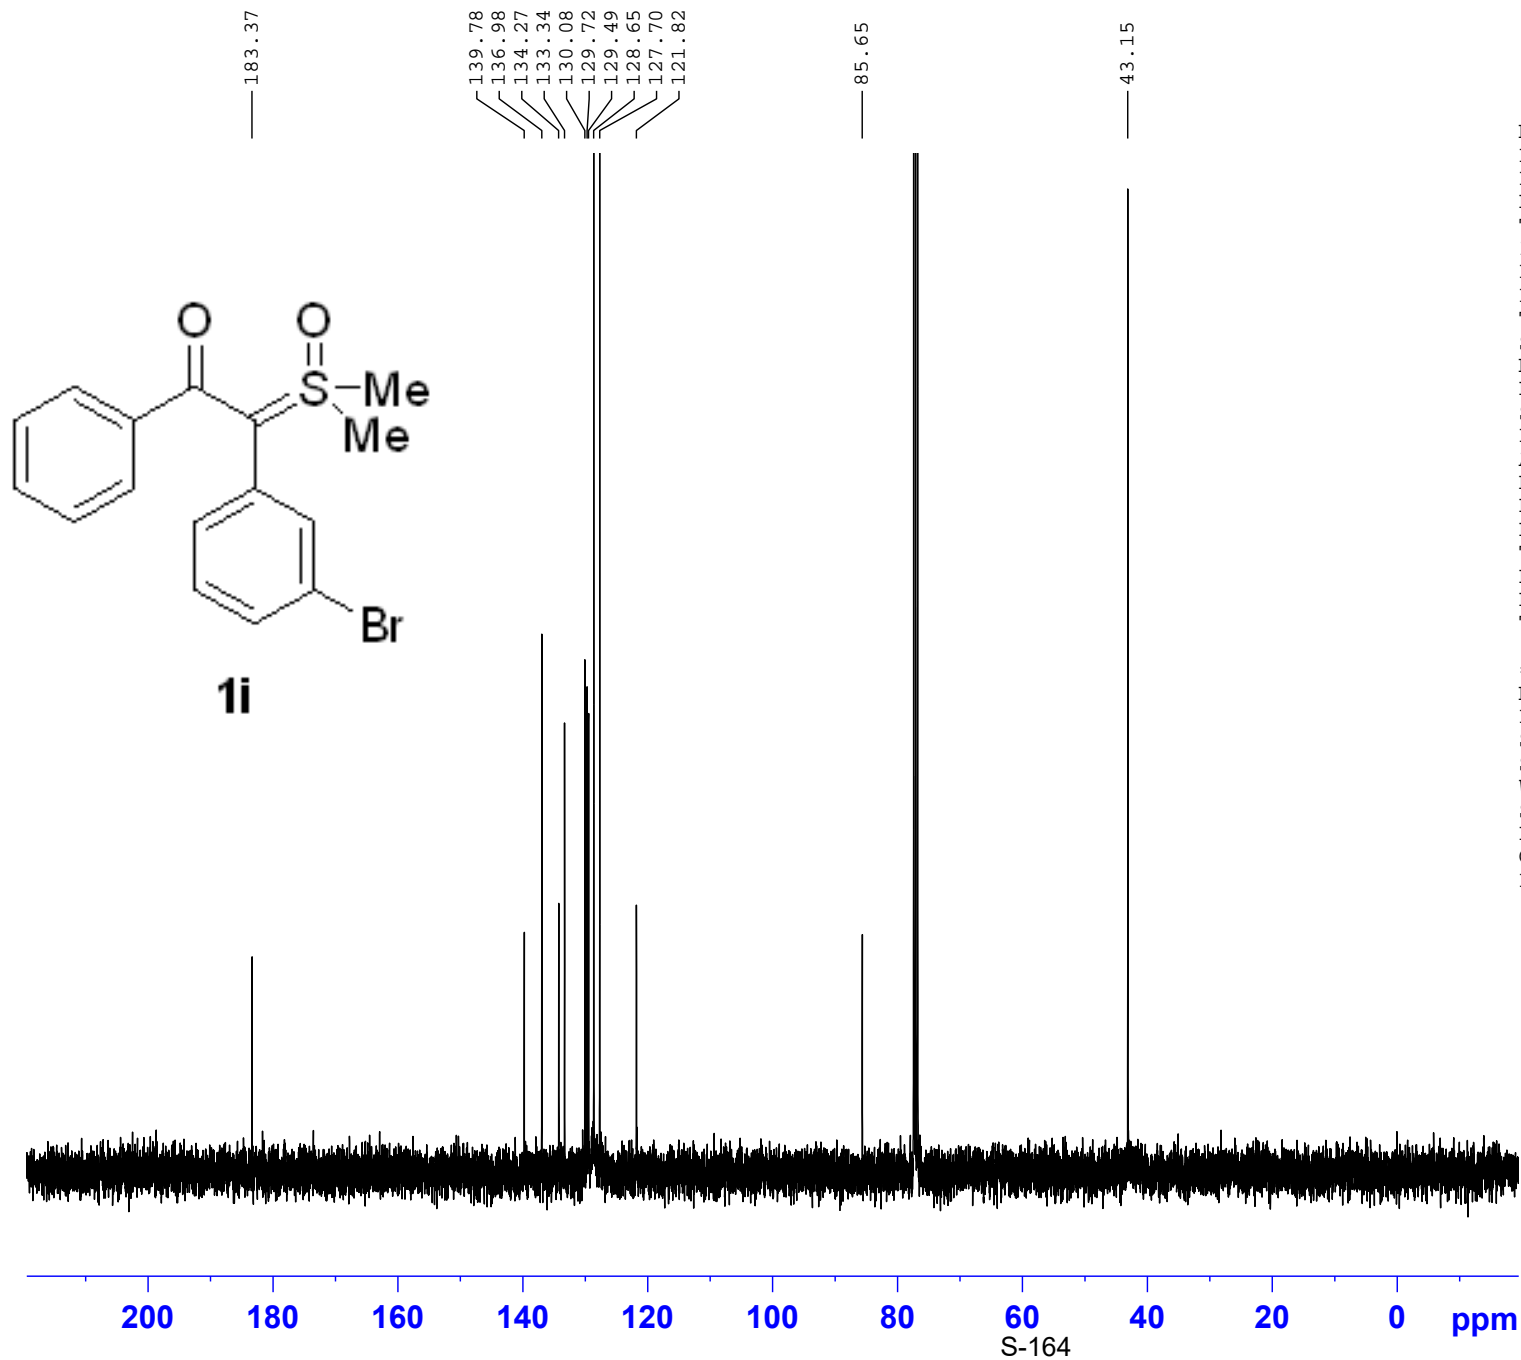

7.27  
7.26  
7.24  
7.15  
7.15  
7.13  
7.12  
7.11  
7.11  
6.99  
6.97  
6.95  
6.95  
6.94  
6.94  
6.92  
6.91  
6.88

— 3.60

— 2.26

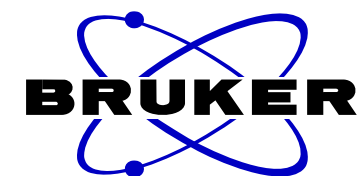

```

NAME      HNMR-gwg-1-86
EXPNO     3242
PROCNO    1
Date_     20210426
Time      10.03
INSTRUM   spect
PROBHD    5 mm PABBO BB-
PULPROG   zg30
TD        65536
SOLVENT   CDCl3
NS        16
DS        2
SWH       6009.615 Hz
FIDRES    0.091699 Hz
AQ        5.4526453 sec
RG        71.8
DW        83.200 usec
DE        6.50 usec
TE        296.2 K
D1        1.00000000 sec
TD0       1
  
```

```

===== CHANNEL f1 =====
SFO1     300.1318534 MHz
NUC1     1H
P1       10.00 usec
SI       65536
SF       300.1300043 MHz
WDW      EM
SSB      0
LB       0.30 Hz
GB       0
PC       1.00
  
```

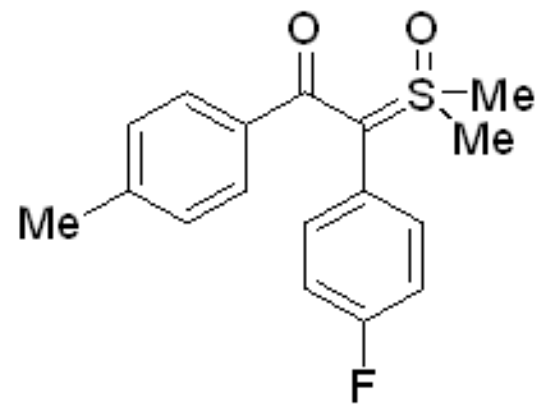

1j

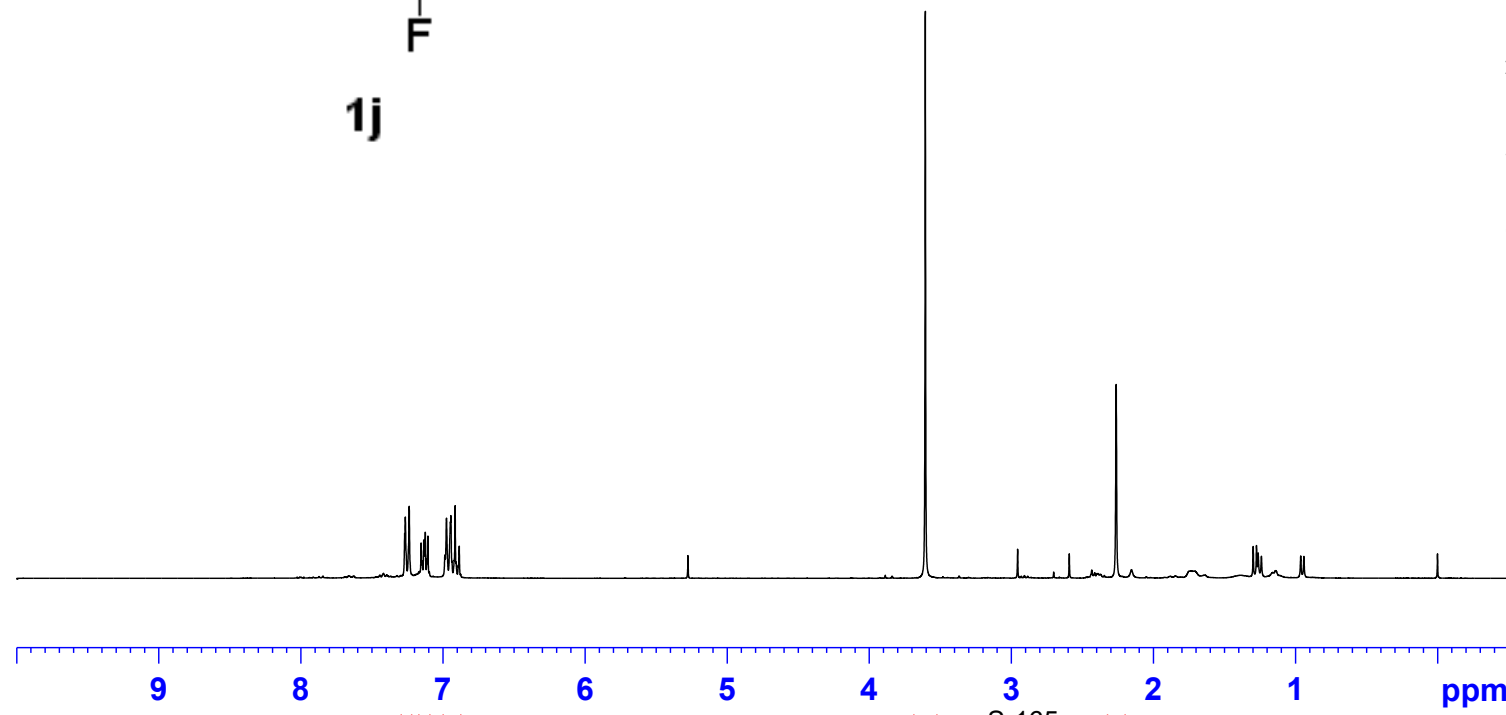

2.37  
2.14  
4.21

6.00

S-165

3.10

ppm

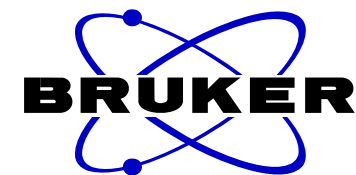

NAME CNMR-gwg-1-86  
EXPNO 3244  
PROCNO 1  
Date\_ 20210426  
Time 10.46  
INSTRUM spect  
PROBHD 5 mm PABBO BB-  
PULPROG zgpg30  
TD 65536  
SOLVENT CDCl3  
NS 600  
DS 4  
SWH 18028.846 Hz  
FIDRES 0.275098 Hz  
AQ 1.8175818 sec  
RG 203  
DW 27.733 usec  
DE 6.50 usec  
TE 296.2 K  
D1 2.00000000 sec  
D11 0.03000000 sec  
TD0 1

==== CHANNEL f1 =====  
SFO1 75.4752949 MHz  
NUC1 13C  
P1 9.50 usec  
SI 32768  
SF 75.4677485 MHz  
WDW EM  
SSB 0  
LB 1.00 Hz  
GB 0  
PC 1.40

183.00  
163.82  
160.54  
139.64  
137.09  
136.47  
136.36  
128.69  
128.27  
128.18  
128.14  
115.41  
115.13

85.20

43.04

21.33

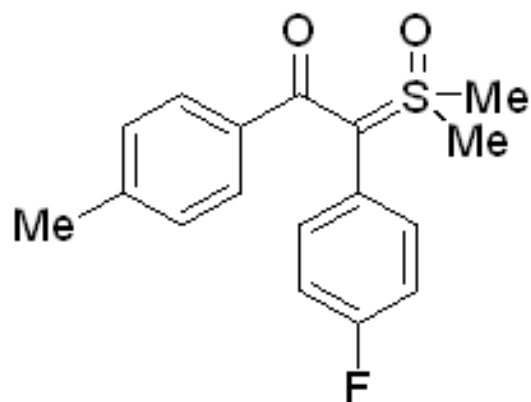

1j

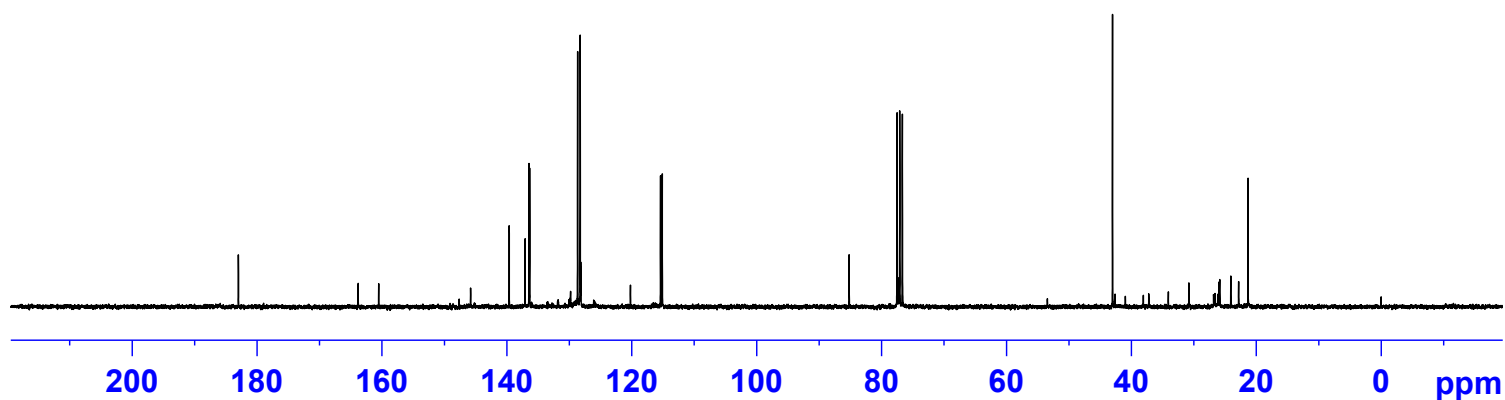

— -114.67

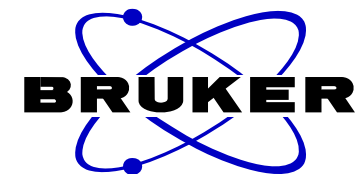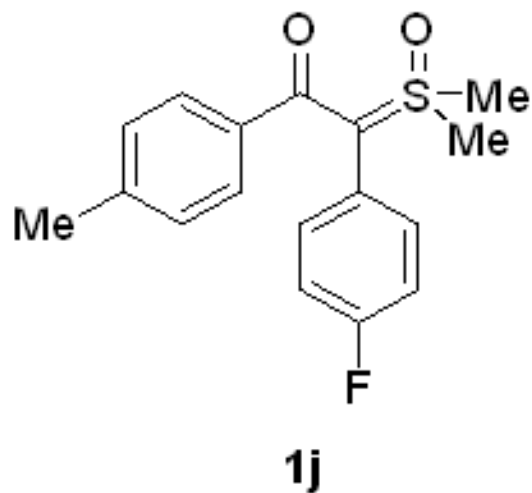

NAME FNMN-gwg-1-86  
EXPNO 3243  
PROCNO 1  
Date\_ 20210426  
Time 10.05  
INSTRUM spect  
PROBHD 5 mm PABBO BB-  
PULPROG zgfhigqn.2  
TD 131072  
SOLVENT CDCl3  
NS 16  
DS 4  
SWH 66964.289 Hz  
FIDRES 0.510897 Hz  
AQ 0.9787210 sec  
RG 203  
DW 7.467 usec  
DE 6.50 usec  
TE 296.1 K  
D1 1.00000000 sec  
D11 0.03000000 sec  
D12 0.00002000 sec  
TD0 1

==== CHANNEL f1 =====  
SFO1 282.3761148 MHz  
NUC1 19F  
P1 14.50 usec  
SI 65536  
SF 282.4043552 MHz  
WDW EM  
SSB 0  
LB 0.30 Hz  
GB 0  
PC 1.00

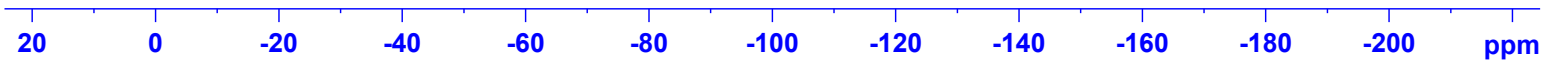

7.35  
7.34  
7.34  
7.32  
7.31  
7.26  
7.26  
7.24  
7.17  
7.16  
7.15  
7.14  
7.13  
7.12  
6.97  
6.96  
6.94  
6.92  
6.91  
6.70  
6.69  
6.69  
6.67  
6.66

3.76  
3.62

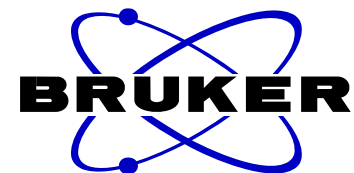

NAME HNMR-gwg-wm-1-38-p-OMe  
EXPNO 3157  
PROCNO 1  
Date\_ 20210422  
Time 9.51  
INSTRUM spect  
PROBHD 5 mm PABBO BB-  
PULPROG zg30  
TD 65536  
SOLVENT CDCl3  
NS 16  
DS 2  
SWH 6009.615 Hz  
FIDRES 0.091699 Hz  
AQ 5.4526453 sec  
RG 203  
DW 83.200 usec  
DE 6.50 usec  
TE 296.1 K  
D1 1.00000000 sec  
TD0 1

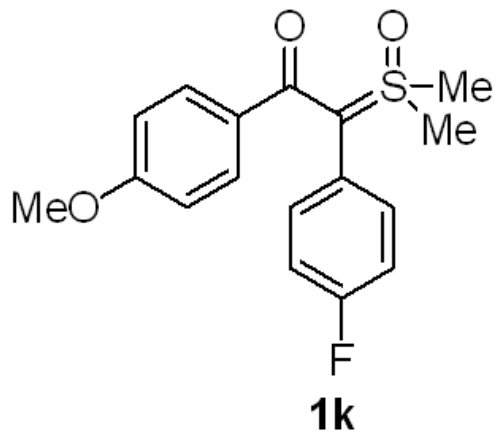

==== CHANNEL f1 =====  
SFO1 300.1318534 MHz  
NUC1 1H  
P1 10.00 usec  
SI 65536  
SF 300.1300067 MHz  
WDW EM  
SSB 0  
LB 0.30 Hz  
GB 0  
PC 1.00

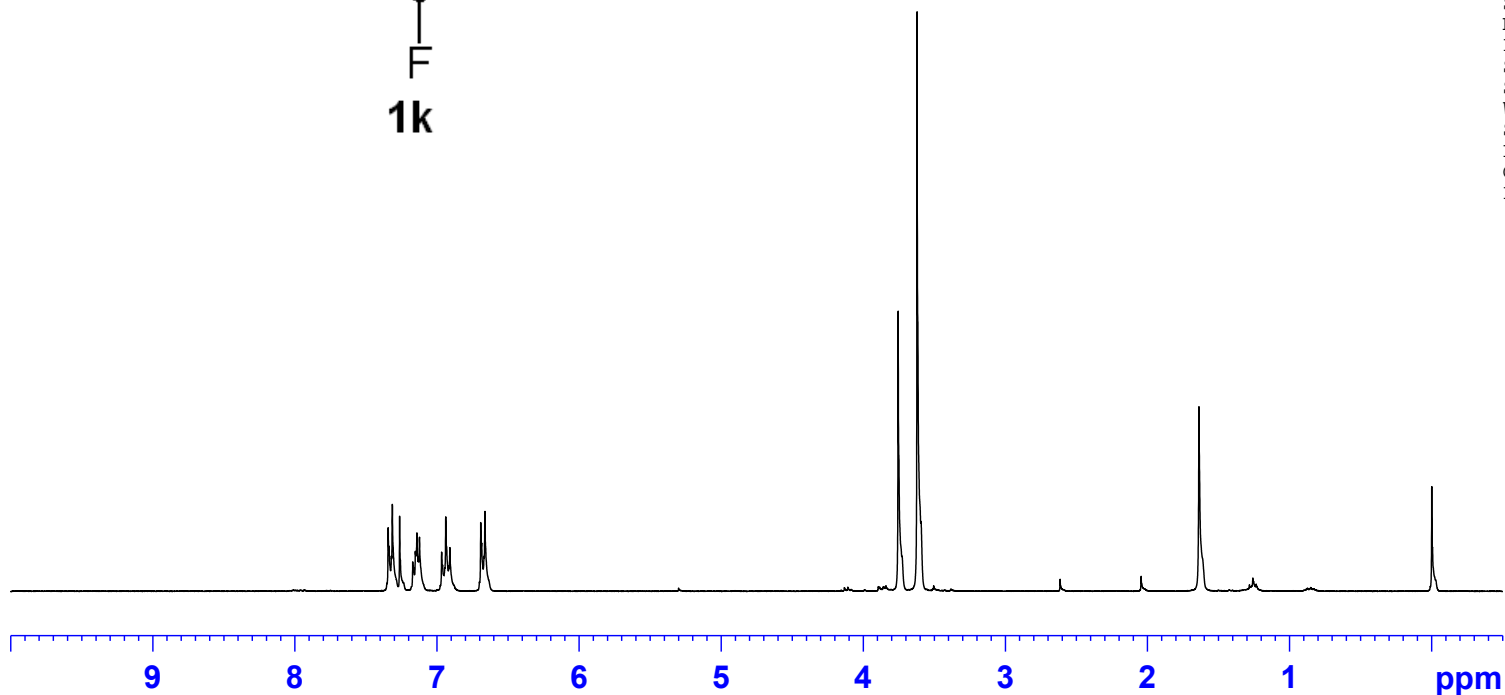

1.95  
2.01  
2.10  
1.99

3.00  
5.93

S-168





NAME CNMR-gwg-wm-1-38-p-OMe  
EXPNO 3203  
PROCNO 1  
Date\_ 20210423  
Time 11.25  
INSTRUM spect  
PROBHD 5 mm PABBO BB-  
PULPROG zgpg30  
TD 65536  
SOLVENT CDC13  
NS 600  
DS 4  
SWH 18028.846 Hz  
FIDRES 0.275098 Hz  
AQ 1.8175818 sec  
RG 203  
DW 27.733 usec  
DE 6.50 usec  
TE 296.1 K  
D1 2.00000000 sec  
D11 0.03000000 sec  
TD0 1

==== CHANNEL f1 =====  
SFO1 75.4752949 MHz  
NUC1 13C  
P1 9.50 usec  
SI 32768  
SF 75.4677485 MHz  
WDW EM  
SSB 0  
LB 1.00 Hz  
GB 0  
PC 1.40

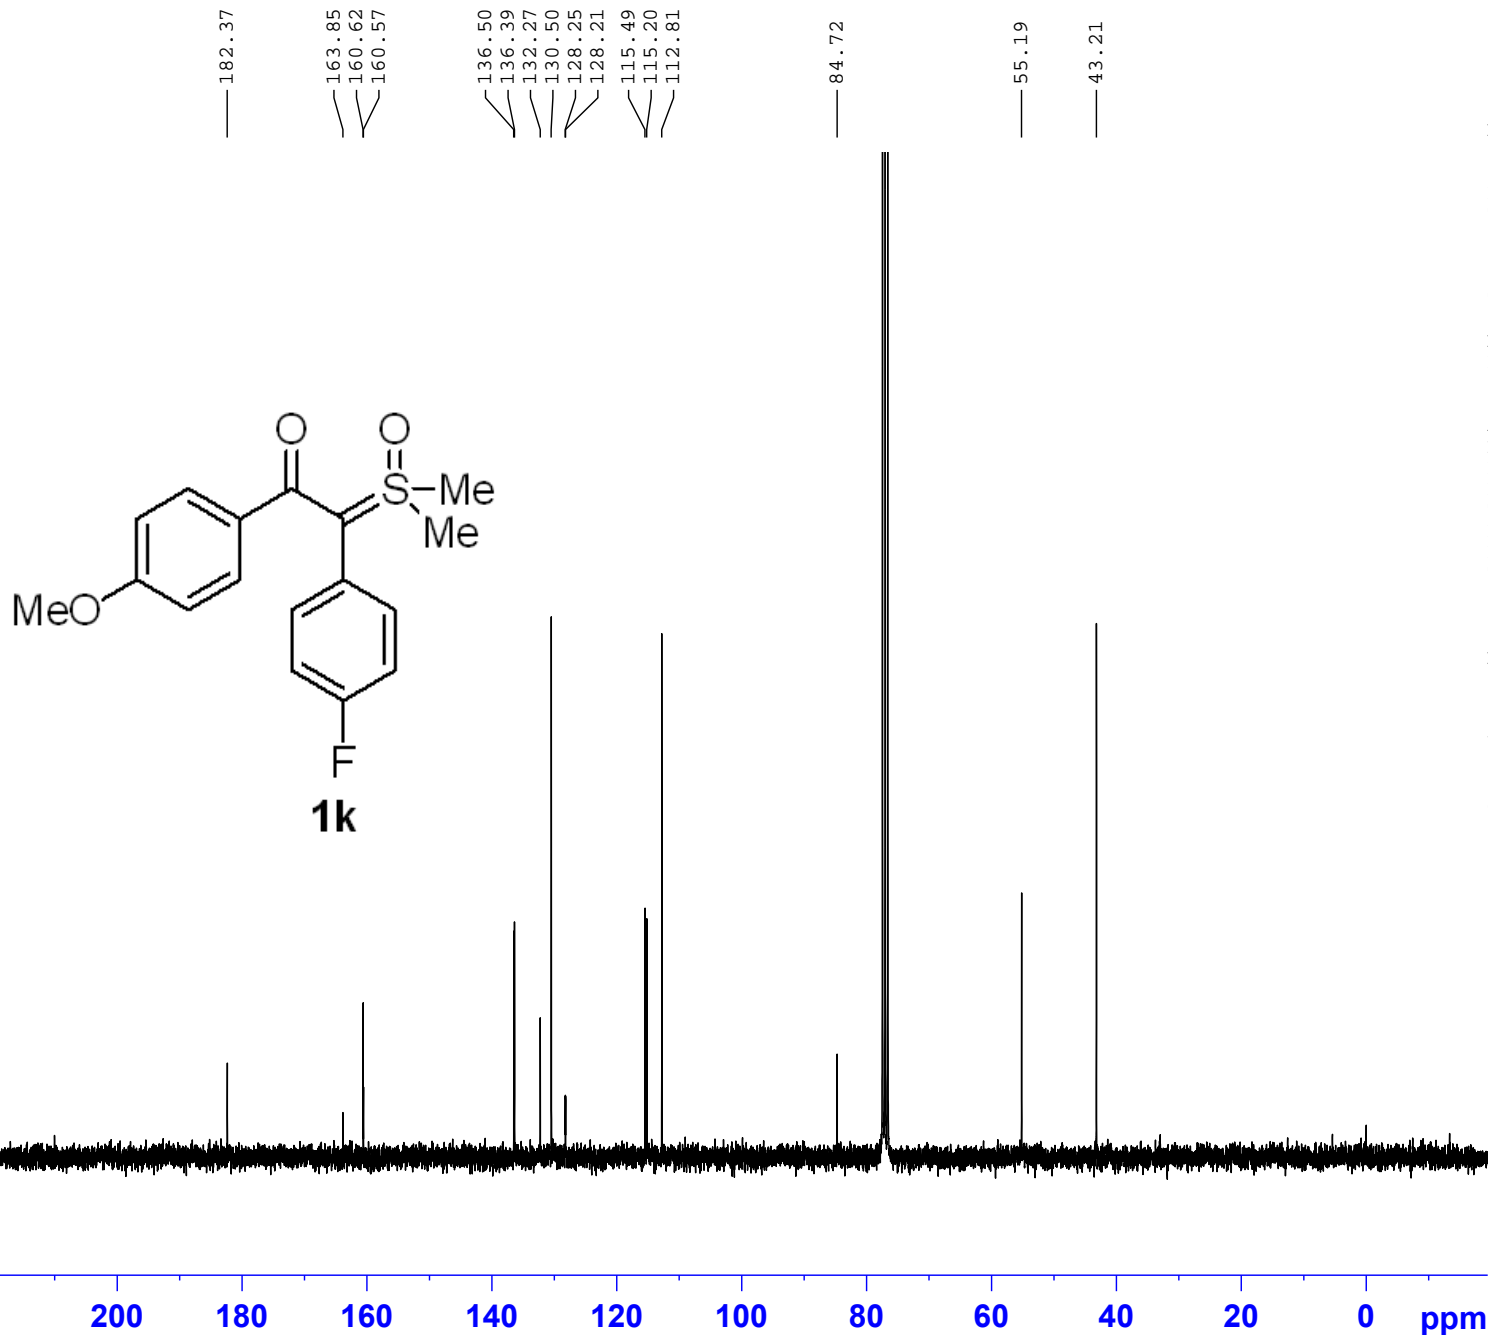

— -114.67

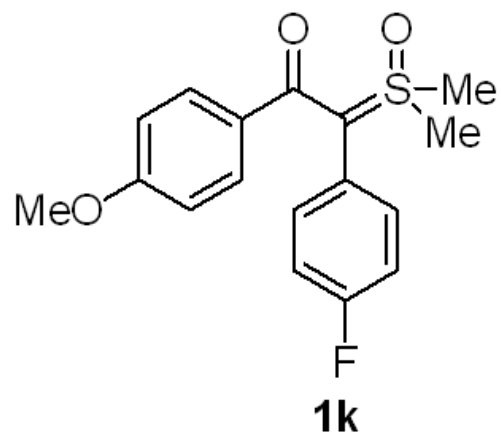

```
NAME      FNMR-gwg-wm-1-38-p-OMe
EXPNO     3202
PROCNO    1
Date_     20210423
Time      10.44
INSTRUM   spect
PROBHD    5 mm PABBO BB-
PULPROG   zgfhigqn.2
TD        131072
SOLVENT   CDC13
NS        16
DS        4
SWH       66964.289 Hz
FIDRES    0.510897 Hz
AQ        0.9787210 sec
RG        203
DW        7.467 usec
DE        6.50 usec
TE        296.2 K
D1        1.00000000 sec
D11       0.03000000 sec
D12       0.00002000 sec
TD0       1
```

```
===== CHANNEL f1 =====
SF01     282.3761148 MHz
NUC1      19F
P1        14.50 usec
SI        65536
SF        282.4043552 MHz
WDW       EM
SSB       0
LB        0.30 Hz
GB        0
PC        1.00
```

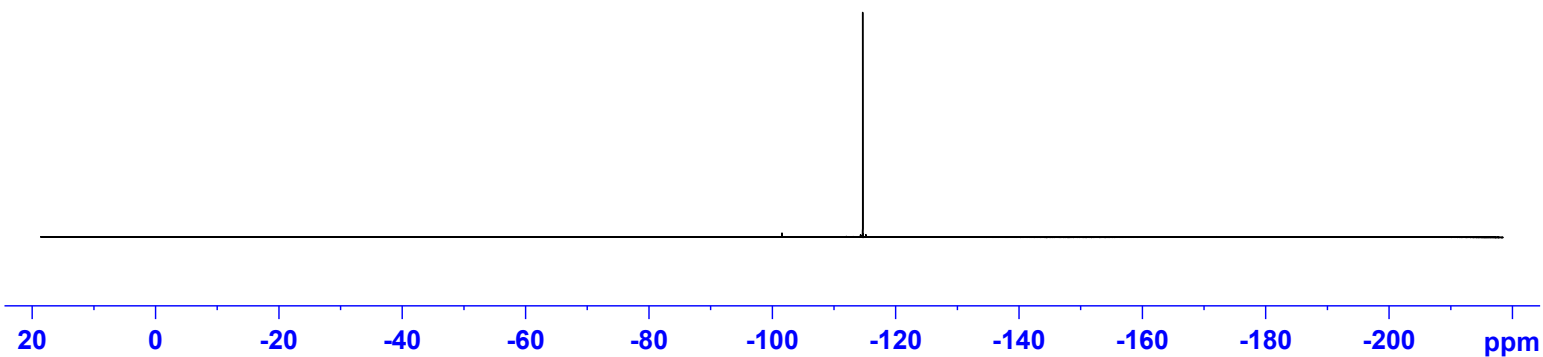

S-170

7.65  
7.63  
7.51  
7.50  
7.49  
7.49  
7.47  
7.46  
7.46  
7.46  
7.45  
7.45  
7.44  
7.43  
7.30  
7.22  
7.22  
7.21  
7.20  
7.19  
7.19  
6.97  
6.96  
6.94  
6.93  
6.92  
3.70

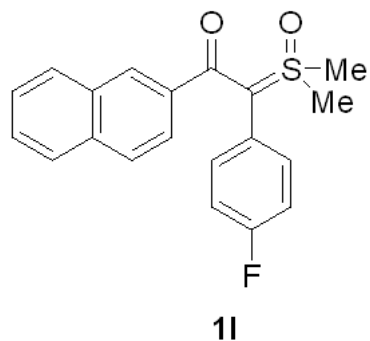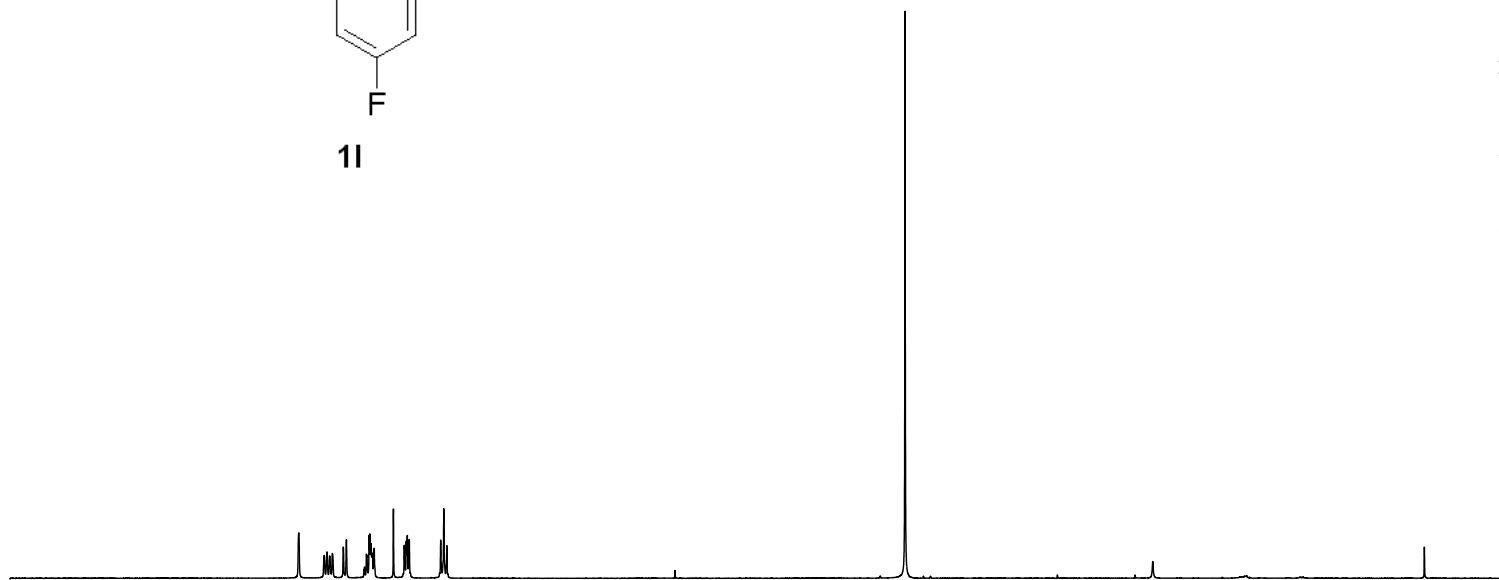

NAME HNMR-gwg-1-80  
EXPNO 24  
PROCNO 1  
Date\_ 20210422  
Time 14.30  
INSTRUM spect  
PROBHD 5 mm PABBO BB-  
PULPROG zg30  
TD 65536  
SOLVENT CDCl3  
NS 6  
DS 2  
SWH 8223.685 Hz  
FIDRES 0.125483 Hz  
AQ 3.9846387 sec  
RG 113.67  
DW 60.800 usec  
DE 6.50 usec  
TE 294.2 K  
D1 1.00000000 sec  
TD0 1

==== CHANNEL f1 =====  
NUC1 1H  
P1 14.40 usec  
SI 65536  
SF 400.1900000 MHz  
WDW EM  
SSB 0  
LB 0.30 Hz  
GB 0  
PC 1.00

1.00  
1.98  
1.07  
2.96  
1.97  
1.94

5.84

S-171



NAME CNMR-gwg-1-80  
EXPNO 3184  
PROCNO 1  
Date\_ 20210422  
Time 23.19  
INSTRUM spect  
PROBHD 5 mm PABBO BB-  
PULPROG zgpg30  
TD 65536  
SOLVENT CDCl3  
NS 500  
DS 4  
SWH 18028.846 Hz  
FIDRES 0.275098 Hz  
AQ 1.8175818 sec  
RG 203  
DW 27.733 usec  
DE 6.50 usec  
TE 296.2 K  
D1 2.00000000 sec  
D11 0.03000000 sec  
TD0 1

==== CHANNEL f1 =====  
SFO1 75.4752949 MHz  
NUC1 13C  
P1 9.50 usec  
SI 32768  
SF 75.4677485 MHz  
WDW EM  
SSB 0  
LB 1.00 Hz  
GB 0  
PC 1.40

182.80  
163.88  
160.60  
137.39  
136.53  
136.42  
133.77  
132.61  
129.00  
128.81  
127.97  
127.92  
127.52  
127.01  
126.85  
126.03  
125.87  
115.52  
115.24

85.91

43.02

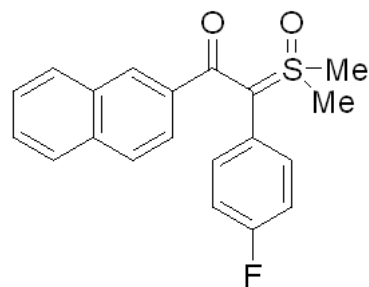

11

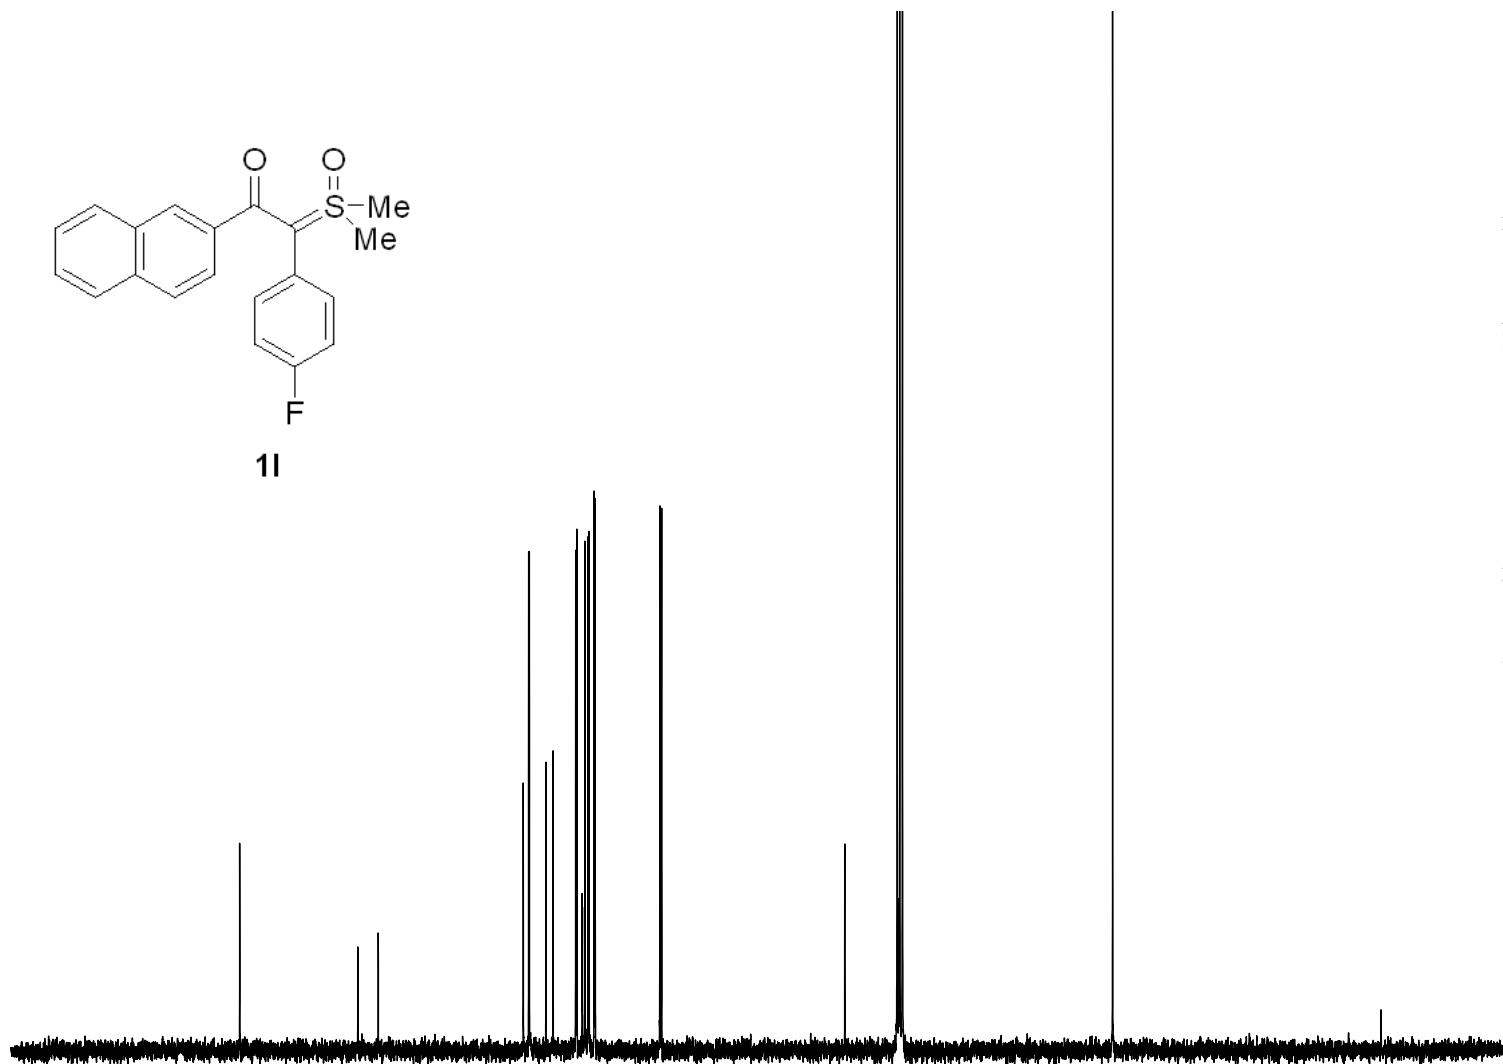

200 180 160 140 120 100 80 60 40 20 0 ppm

— -114.40

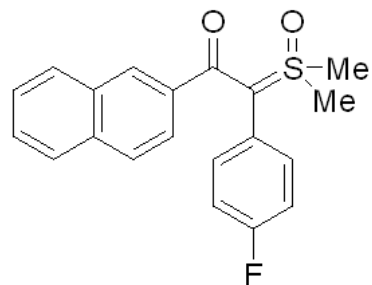

11

NAME FNMN-gwg-1-80  
EXPNO 3185  
PROCNO 1  
Date\_ 20210422  
Time 23.21  
INSTRUM spect  
PROBHD 5 mm PABBO BB-  
PULPROG zgfhigqn.2  
TD 131072  
SOLVENT CDCl3  
NS 16  
DS 4  
SWH 66964.289 Hz  
FIDRES 0.510897 Hz  
AQ 0.9787210 sec  
RG 203  
DW 7.467 usec  
DE 6.50 usec  
TE 296.1 K  
D1 1.00000000 sec  
D11 0.03000000 sec  
D12 0.00002000 sec  
TD0 1

==== CHANNEL f1 =====  
SFO1 282.3761148 MHz  
NUC1 19F  
P1 14.50 usec  
SI 65536  
SF 282.4043552 MHz  
WDW EM  
SSB 0  
LB 0.30 Hz  
GB 0  
PC 1.00



S-173

7.15  
7.14  
7.13  
7.12  
7.11  
7.10  
7.00  
6.96  
6.93  
6.92  
6.91  
6.90  
6.90  
6.88  
6.87  
6.86

— 3.58

— 2.14



NAME HNMR-gwg-2-24  
EXPNO 3563  
PROCNO 1  
Date\_ 20210518  
Time 11.16  
INSTRUM spect  
PROBHD 5 mm PABBO BB-  
PULPROG zg30  
TD 65536  
SOLVENT CDCl3  
NS 16  
DS 2  
SWH 6009.615 Hz  
FIDRES 0.091699 Hz  
AQ 5.4526453 sec  
RG 32  
DW 83.200 usec  
DE 6.50 usec  
TE 296.1 K  
D1 1.00000000 sec  
TD0 1

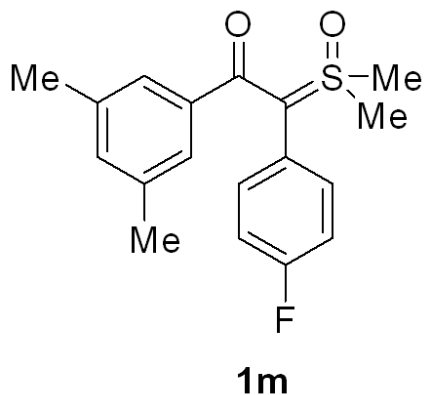

==== CHANNEL f1 =====  
SFO1 300.1318534 MHz  
NUC1 1H  
P1 10.00 usec  
SI 65536  
SF 300.1300000 MHz  
WDW EM  
SSB 0  
LB 0.30 Hz  
GB 0  
PC 1.00

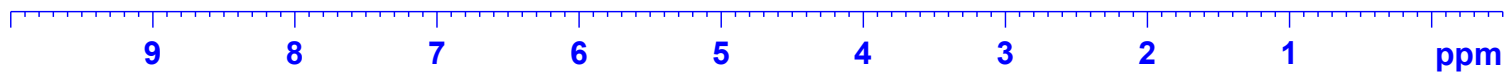

2.15  
4.96

6.00

S-174

6.09



NAME CNMR-gwg-2-24  
EXPNO 3565  
PROCNO 1  
Date\_ 20210518  
Time 11.58  
INSTRUM spect  
PROBHD 5 mm PABBO BB-  
PULPROG zgpg30  
TD 65536  
SOLVENT CDCl3  
NS 600  
DS 4  
SWH 18028.846 Hz  
FIDRES 0.275098 Hz  
AQ 1.8175818 sec  
RG 203  
DW 27.733 usec  
DE 6.50 usec  
TE 296.1 K  
D1 2.00000000 sec  
D11 0.03000000 sec  
TD0 1

===== CHANNEL f1 =====  
SFO1 75.4752949 MHz  
NUC1 13C  
P1 9.50 usec  
SI 32768  
SF 75.4677485 MHz  
WDW EM  
SSB 0  
LB 1.00 Hz  
GB 0  
PC 1.40

183.40  
163.78  
160.50  
139.87  
136.92  
136.47  
136.36  
131.06  
128.22  
128.18  
126.50  
115.26  
114.98

85.55

42.90

21.14

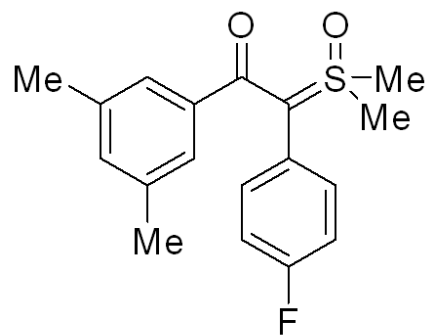

1m

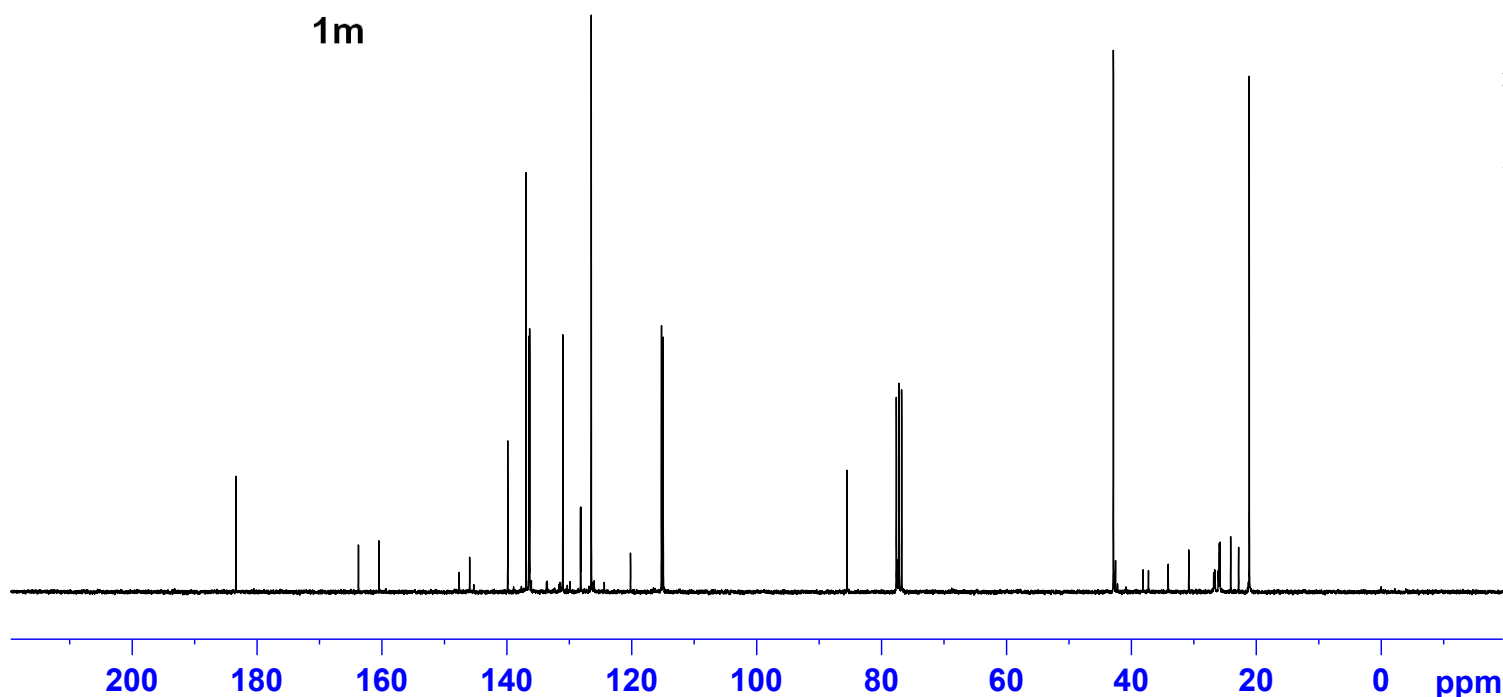



NAME FNMN-gwg-2-24  
EXPNO 3564  
PROCNO 1  
Date\_ 20210518  
Time 11.18  
INSTRUM spect  
PROBHD 5 mm PABBO BB-  
PULPROG zgfhigqn.2  
TD 131072  
SOLVENT CDCl3  
NS 16  
DS 4  
SWH 66964.289 Hz  
FIDRES 0.510897 Hz  
AQ 0.9787210 sec  
RG 203  
DW 7.467 usec  
DE 6.50 usec  
TE 296.2 K  
D1 1.00000000 sec  
D11 0.03000000 sec  
D12 0.00002000 sec  
TD0 1

==== CHANNEL f1 =====  
SFO1 282.3761148 MHz  
NUC1 19F  
P1 14.50 usec  
SI 65536  
SF 282.4043552 MHz  
WDW EM  
SSB 0  
LB 0.30 Hz  
GB 0  
PC 1.00

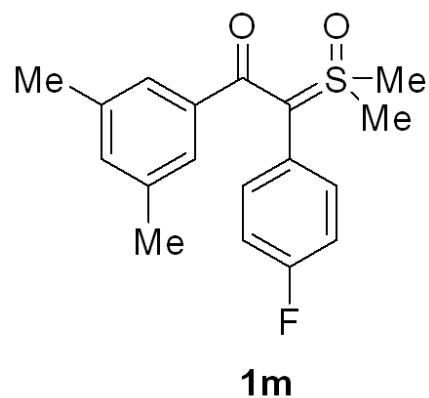

-114.76





7.51  
7.51  
7.50  
7.50  
7.49  
7.48  
7.48  
7.48  
7.34  
7.34  
7.33  
7.32  
7.32  
7.31  
7.21  
7.19  
7.18  
7.09  
7.09  
7.06  
7.06

— 3.63

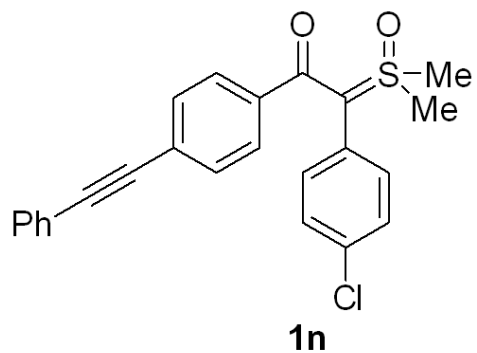

NAME HNMR-gwg-2-83  
EXPNO 3952  
PROCNO 1  
Date\_ 20210603  
Time 9.58  
INSTRUM spect  
PROBHD 5 mm PABBO BB-  
PULPROG zg30  
TD 65536  
SOLVENT CDCl3  
NS 16  
DS 2  
SWH 6009.615 Hz  
FIDRES 0.091699 Hz  
AQ 5.4526453 sec  
RG 144  
DW 83.200 usec  
DE 6.50 usec  
TE 296.1 K  
D1 1.00000000 sec  
TD0 1

==== CHANNEL f1 =====  
SFO1 300.1318534 MHz  
NUC1 1H  
P1 10.00 usec  
SI 65536  
SF 300.1300067 MHz  
WDW EM  
SSB 0  
LB 0.30 Hz  
GB 0  
PC 1.00

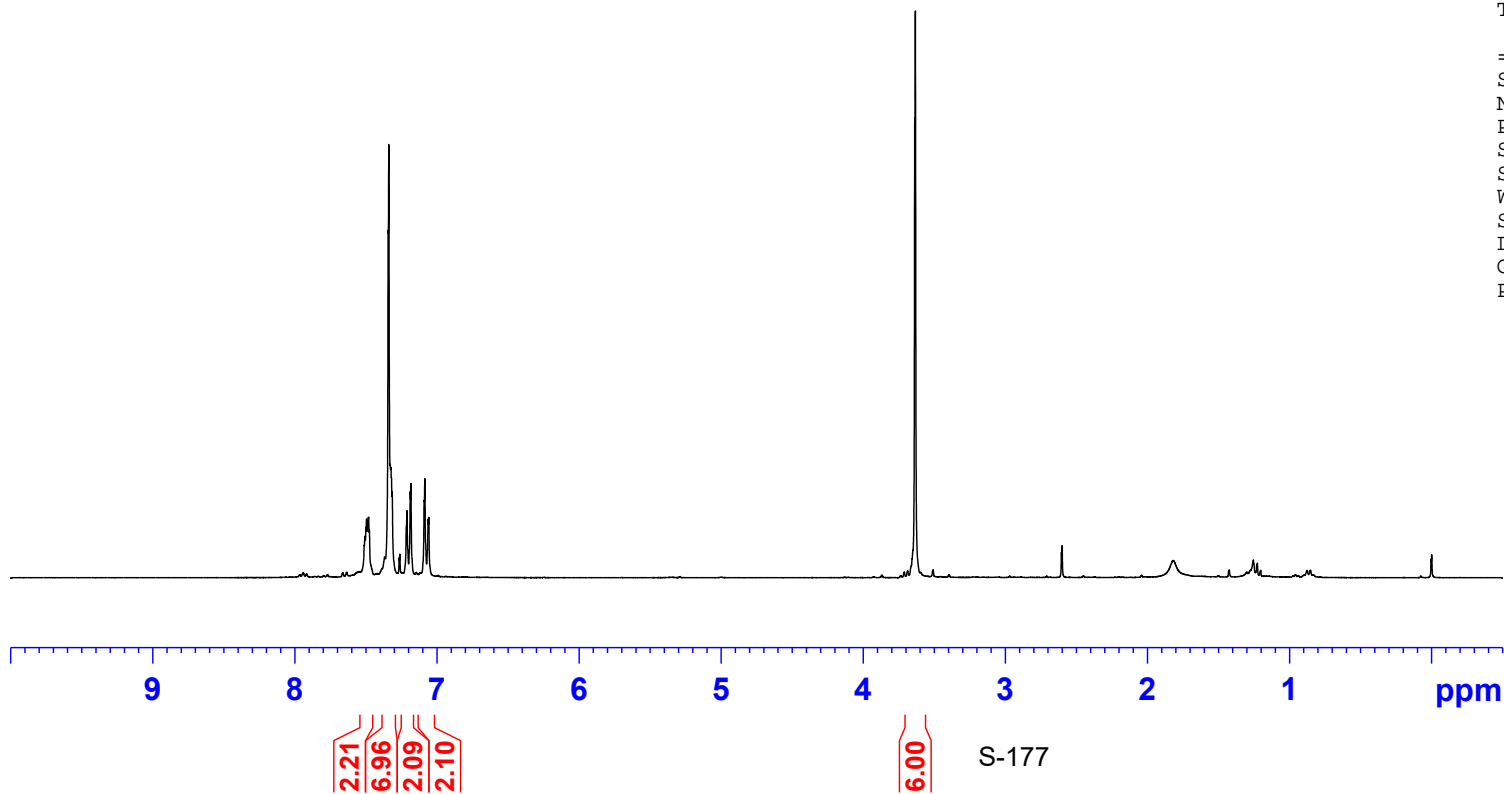



NAME CNMR-gwg-2-83  
EXPNO 4006  
PROCNO 1  
Date\_ 20210605  
Time 11.44  
INSTRUM spect  
PROBHD 5 mm PABBO BB-  
PULPROG zgpg30  
TD 65536  
SOLVENT CDCl3  
NS 1024  
DS 4  
SWH 18028.846 Hz  
FIDRES 0.275098 Hz  
AQ 1.8175818 sec  
RG 203  
DW 27.733 usec  
DE 6.50 usec  
TE 296.1 K  
D1 2.00000000 sec  
D11 0.03000000 sec  
TD0 1

==== CHANNEL f1 =====  
SFO1 75.4752949 MHz  
NUC1 13C  
P1 9.50 usec  
SI 32768  
SF 75.4677485 MHz  
WDW EM  
SSB 0  
LB 1.00 Hz  
GB 0  
PC 1.40

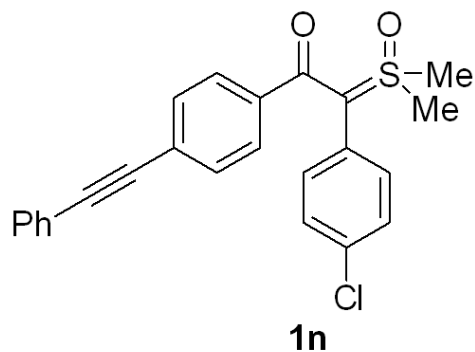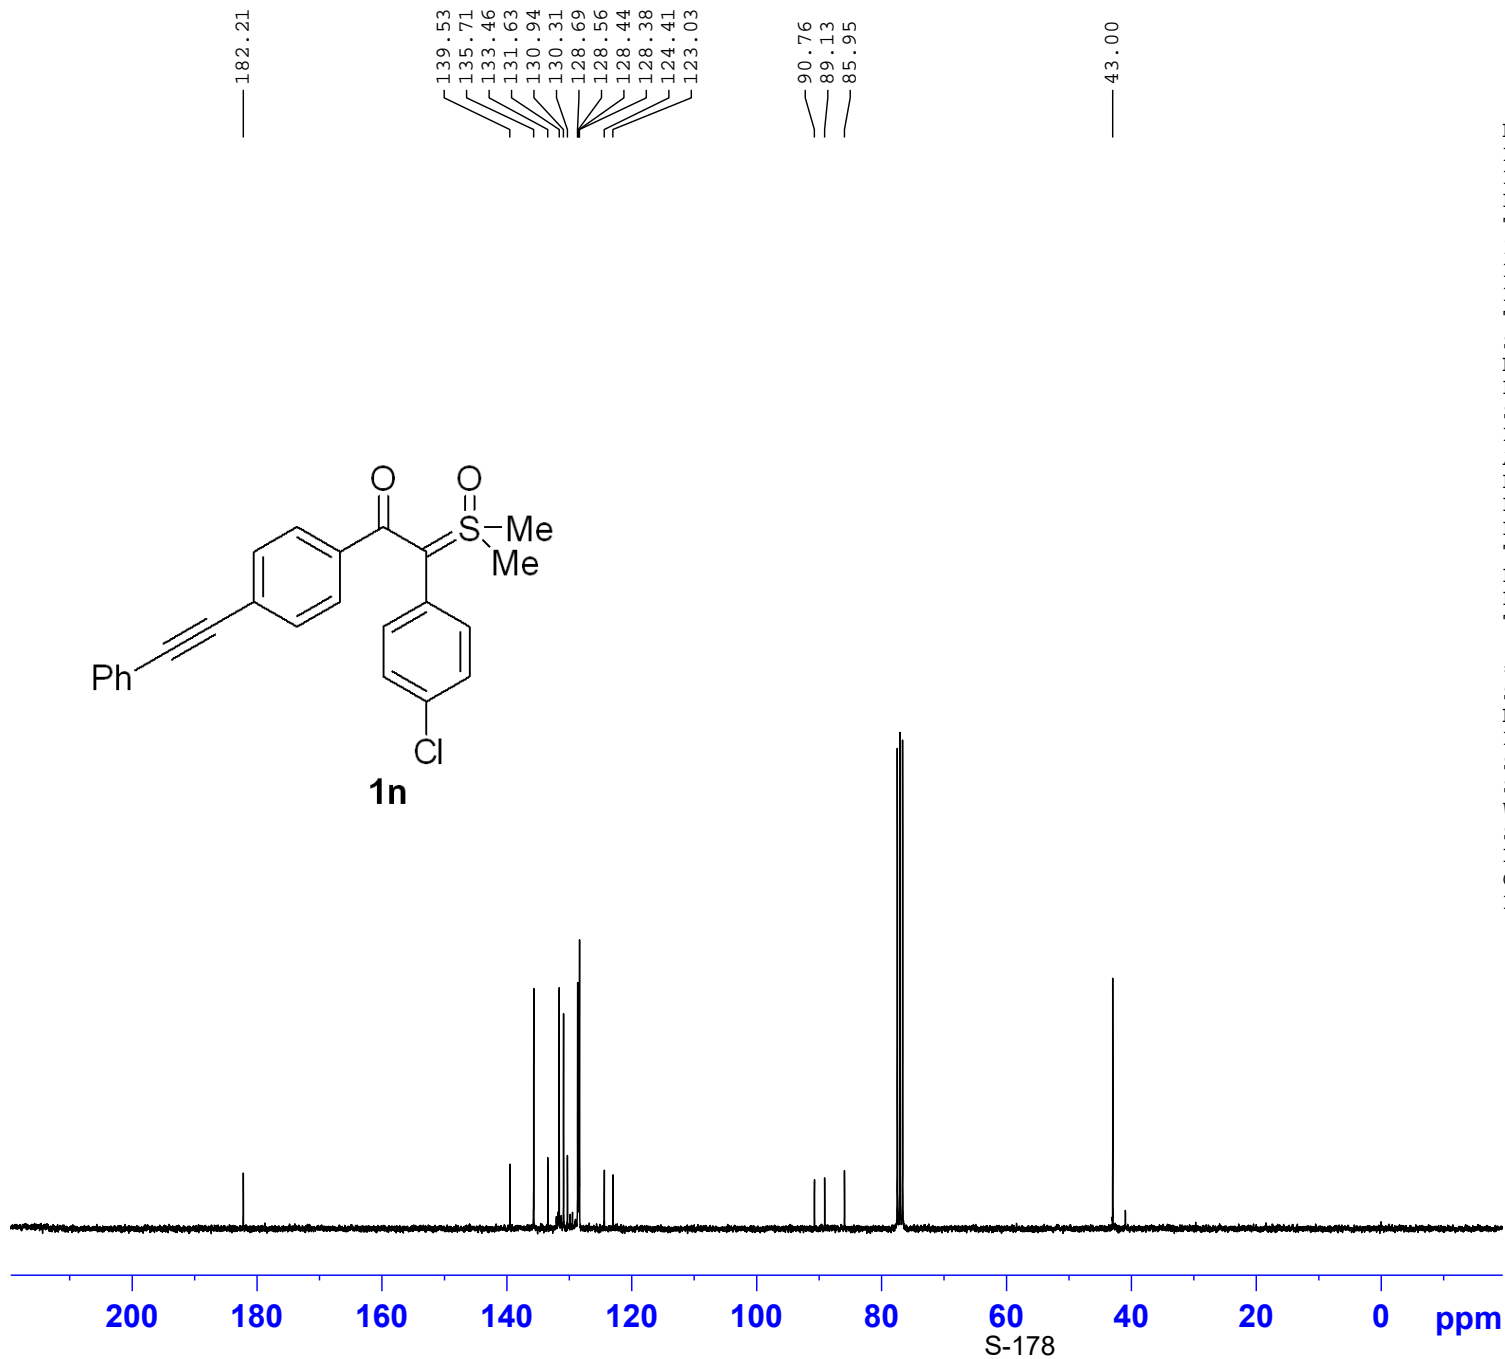

7.42  
7.41  
7.40  
7.40  
7.39  
7.38  
7.36  
7.36  
7.35  
7.28  
7.27  
7.26  
7.26  
7.26  
6.79  
6.77  
6.77  
6.76  
6.59  
6.59  
6.58  
6.58

— 3.62

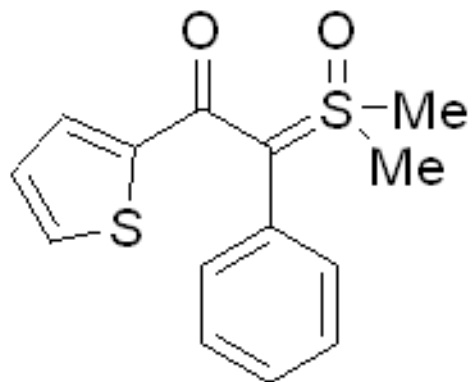

1o

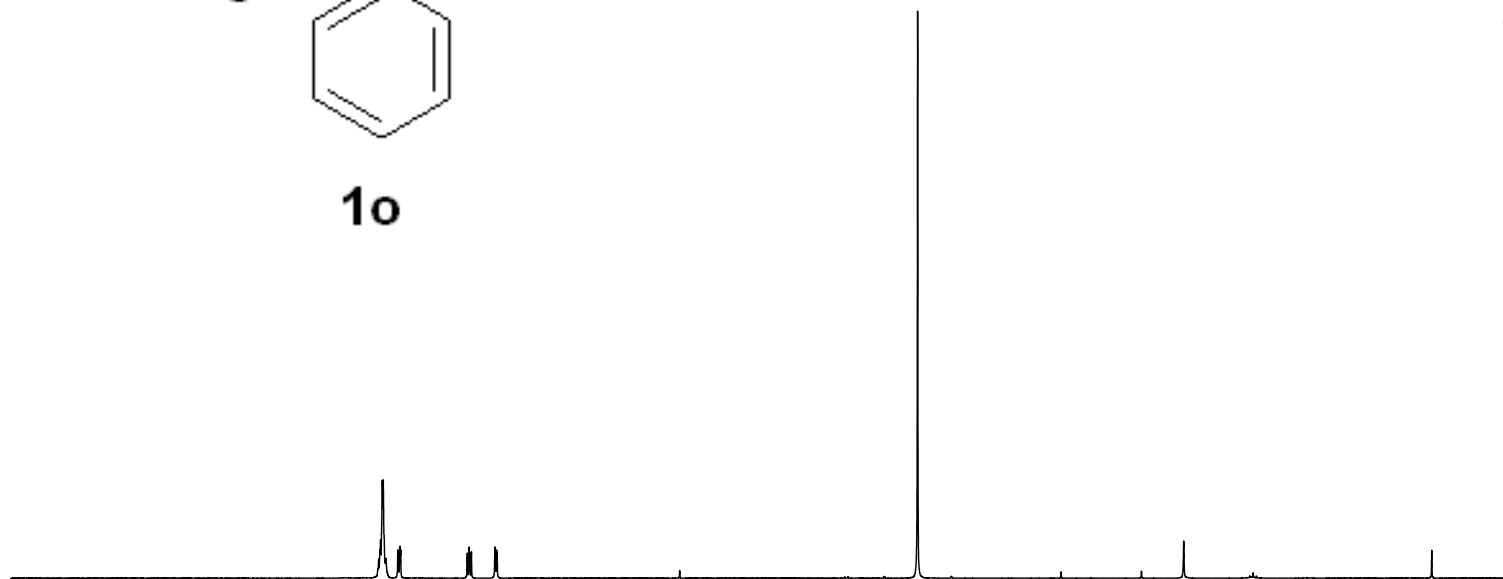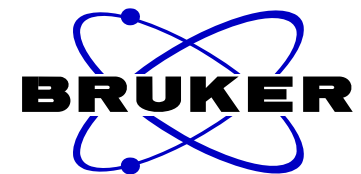

```

NAME      HNMR-gwg-wm-1-41-thiophenyl
EXPNO     3227
PROCNO    1
Date_     20210425
Time      9.56
INSTRUM   spect
PROBHD    5 mm PABBO BB-
PULPROG   zg30
TD        65536
SOLVENT   CDCl3
NS        16
DS        2
SWH       6009.615 Hz
FIDRES    0.091699 Hz
AQ        5.4526453 sec
RG        181
DW        83.200 usec
DE        6.50 usec
TE        296.2 K
D1        1.00000000 sec
TD0       1
  
```

```

===== CHANNEL f1 =====
SFO1     300.1318534 MHz
NUC1     1H
P1       10.00 usec
SI       65536
SF       300.1300060 MHz
WDW      EM
SSB      0
LB       0.30 Hz
GB       0
PC       1.00
  
```



NAME CNMR-gwg-wm-1-41-thiophenyl  
EXPNO 3248  
PROCNO 1  
Date\_ 20210426  
Time 12.16  
INSTRUM spect  
PROBHD 5 mm PABBO BB-  
PULPROG zgpg30  
TD 65536  
SOLVENT CDCl3  
NS 600  
DS 4  
SWH 18028.846 Hz  
FIDRES 0.275098 Hz  
AQ 1.8175818 sec  
RG 203  
DW 27.733 usec  
DE 6.50 usec  
TE 296.1 K  
D1 2.00000000 sec  
D11 0.03000000 sec  
TD0 1

==== CHANNEL f1 =====  
SF01 75.4752949 MHz  
NUC1 13C  
P1 9.50 usec  
SI 32768  
SF 75.4677485 MHz  
WDW EM  
SSB 0  
LB 1.00 Hz  
GB 0  
PC 1.40

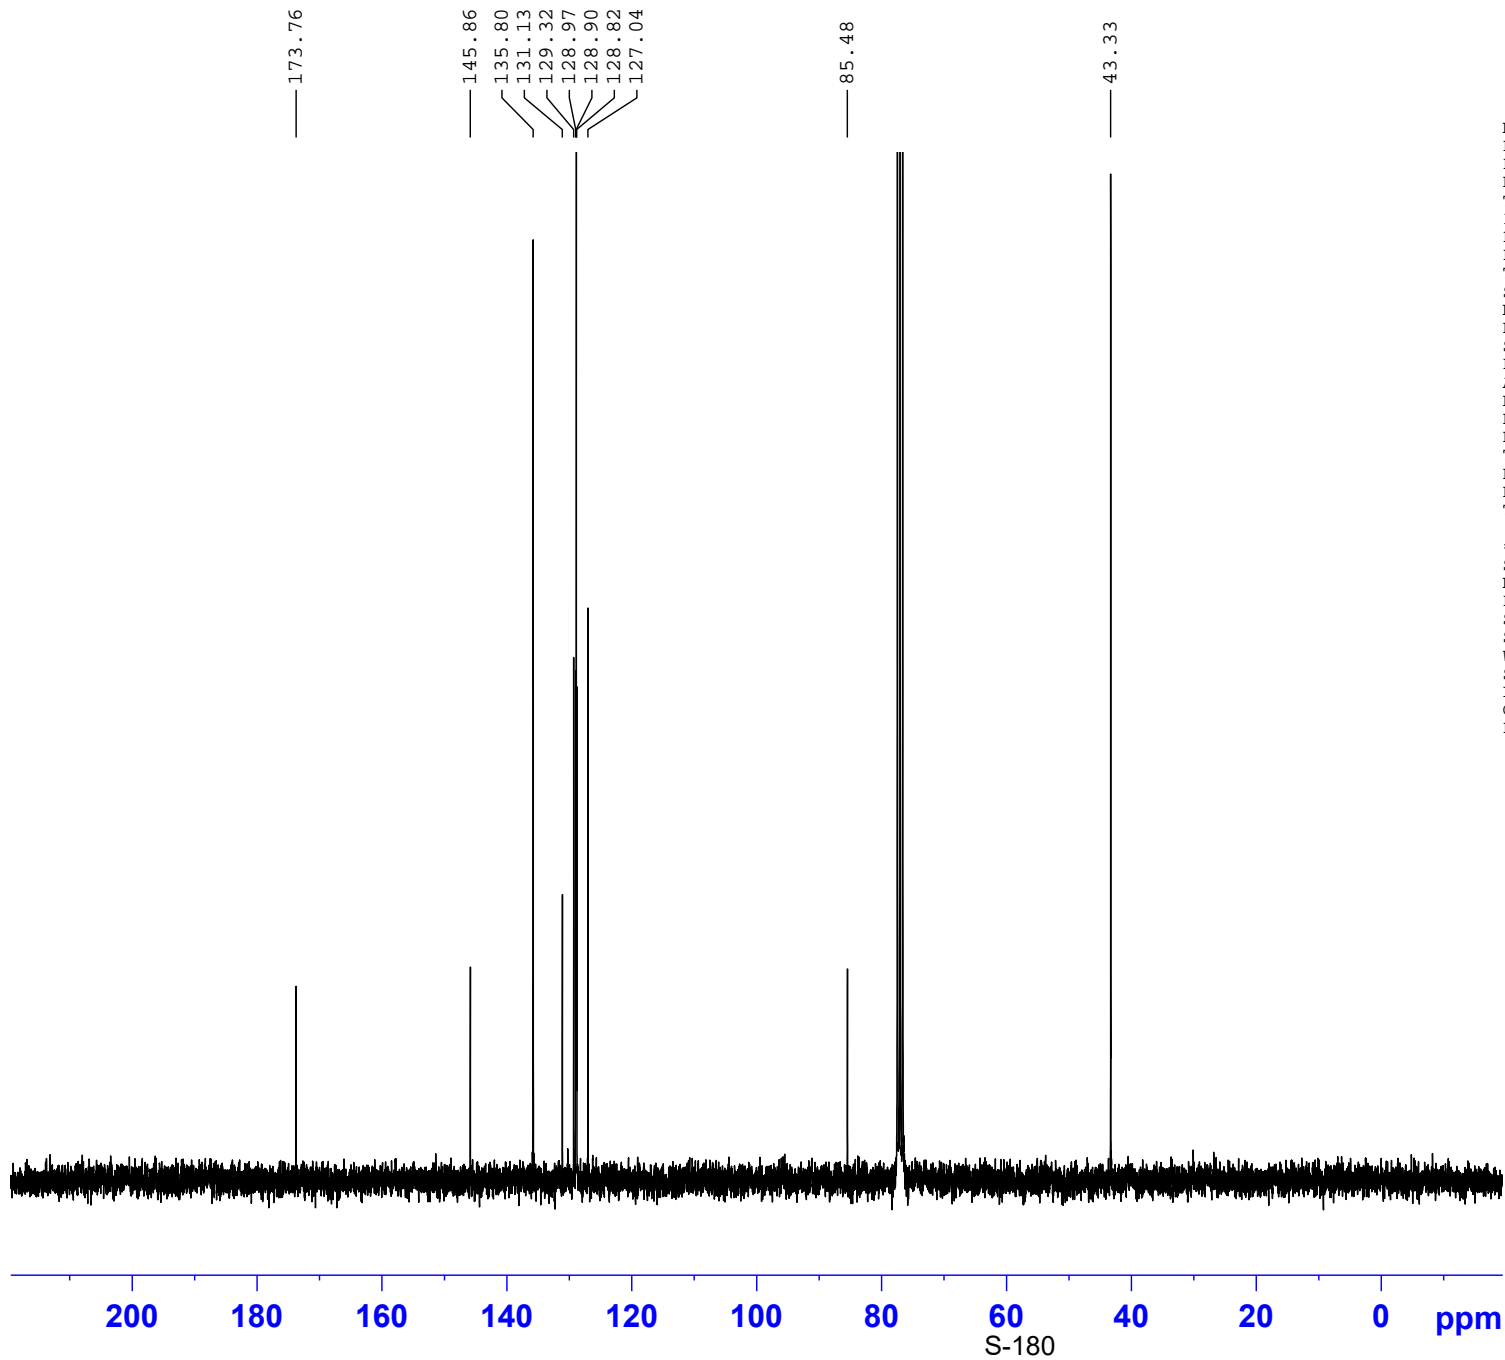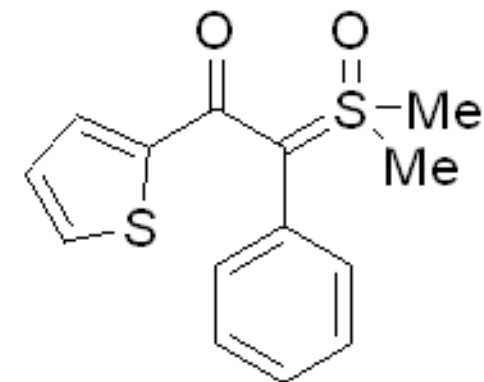

1o

7.33  
7.32  
7.32  
7.31  
7.30  
7.29  
7.28  
7.28  
7.27  
7.26  
7.25  
7.10  
7.09  
7.08  
7.07  
7.06  
7.05  
7.04  
7.03  
6.23  
6.22  
6.22  
6.21  
5.90  
5.89  
5.89  
5.88  
3.62

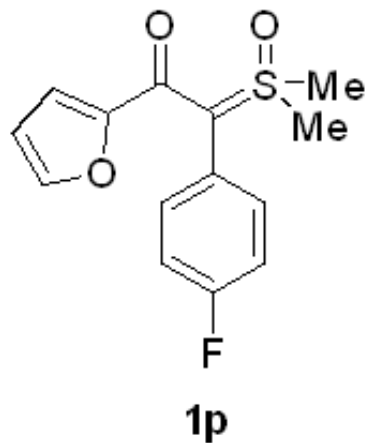

NAME HNMR-gwg-1-85  
EXPNO 3228  
PROCNO 1  
Date\_ 20210425  
Time 10.01  
INSTRUM spect  
PROBHD 5 mm PABBO BB-  
PULPROG zg30  
TD 65536  
SOLVENT CDCl3  
NS 16  
DS 2  
SWH 6009.615 Hz  
FIDRES 0.091699 Hz  
AQ 5.4526453 sec  
RG 144  
DW 83.200 usec  
DE 6.50 usec  
TE 296.1 K  
D1 1.00000000 sec  
TD0 1

==== CHANNEL f1 =====  
SFO1 300.1318534 MHz  
NUC1 1H  
P1 10.00 usec  
SI 65536  
SF 300.1300024 MHz  
WDW EM  
SSB 0  
LB 0.30 Hz  
GB 0  
PC 1.00

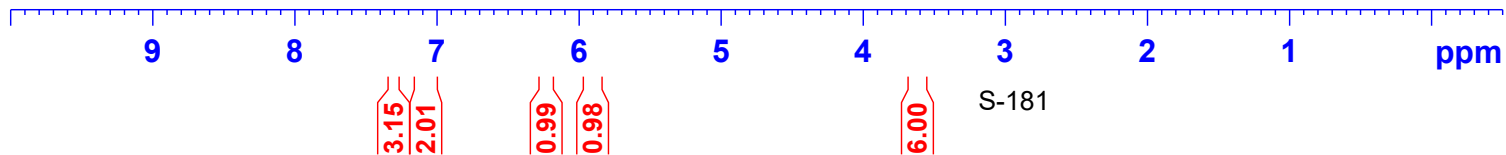

S-181

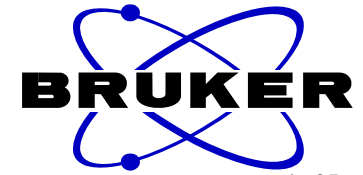

NAME CNMR-gwg-1-85  
EXPNO 3230  
PROCNO 1  
Date\_ 20210425  
Time 10.25  
INSTRUM spect  
PROBHD 5 mm PABBO BB-  
PULPROG zgpg30  
TD 65536  
SOLVENT CDCl3  
NS 300  
DS 4  
SWH 18028.846 Hz  
FIDRES 0.275098 Hz  
AQ 1.8175818 sec  
RG 203  
DW 27.733 usec  
DE 6.50 usec  
TE 296.1 K  
D1 2.00000000 sec  
D11 0.03000000 sec  
TD0 1

==== CHANNEL f1 =====  
SFO1 75.4752949 MHz  
NUC1 13C  
P1 9.50 usec  
SI 32768  
SF 75.4677485 MHz  
WDW EM  
SSB 0  
LB 1.00 Hz  
GB 0  
PC 1.40

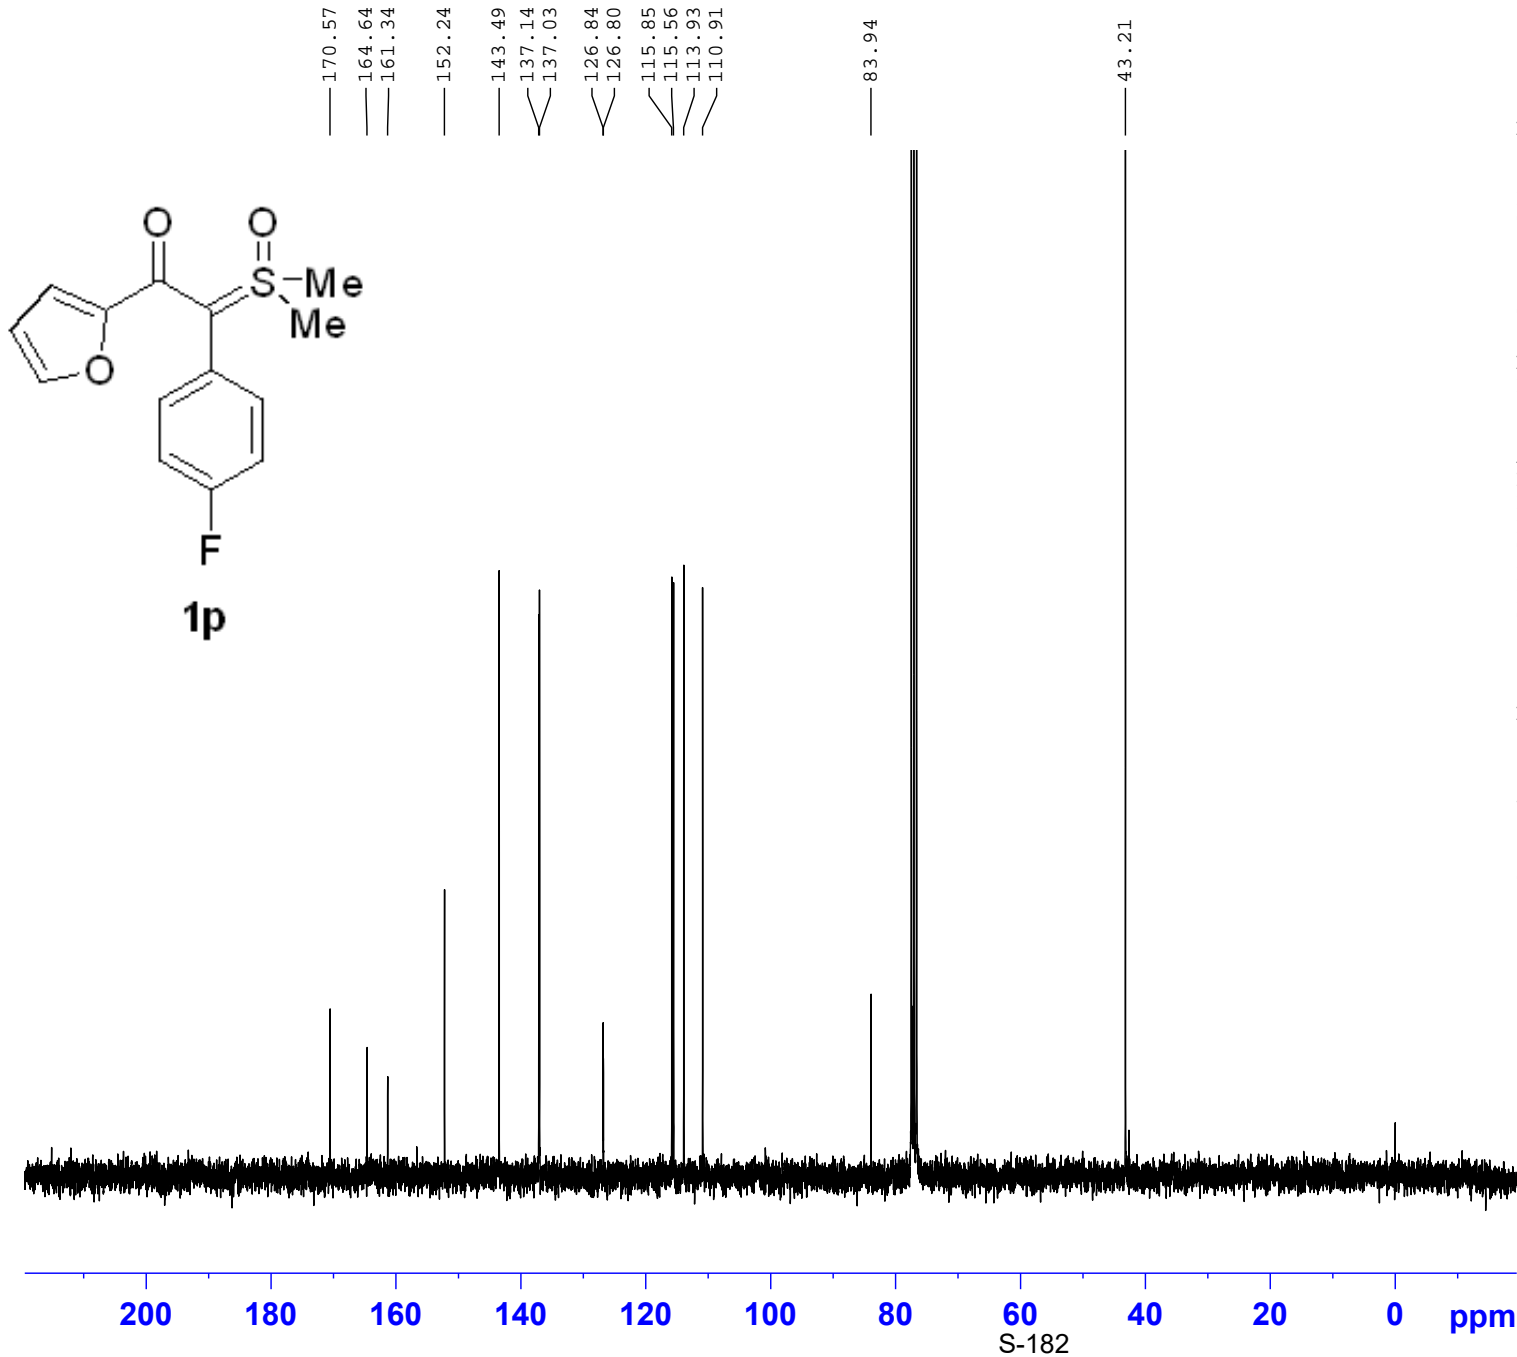



NAME FNMN-gwg-1-85  
EXPNO 3229  
PROCNO 1  
Date\_ 20210425  
Time 10.04  
INSTRUM spect  
PROBHD 5 mm PABBO BB-  
PULPROG zgfhigqn.2  
TD 131072  
SOLVENT CDCl3  
NS 16  
DS 4  
SWH 66964.289 Hz  
FIDRES 0.510897 Hz  
AQ 0.9787210 sec  
RG 203  
DW 7.467 usec  
DE 6.50 usec  
TE 296.1 K  
D1 1.00000000 sec  
D11 0.03000000 sec  
D12 0.00002000 sec  
TD0 1

==== CHANNEL f1 =====  
SFO1 282.3761148 MHz  
NUC1 19F  
P1 14.50 usec  
SI 65536  
SF 282.4043552 MHz  
WDW EM  
SSB 0  
LB 0.30 Hz  
GB 0  
PC 1.00

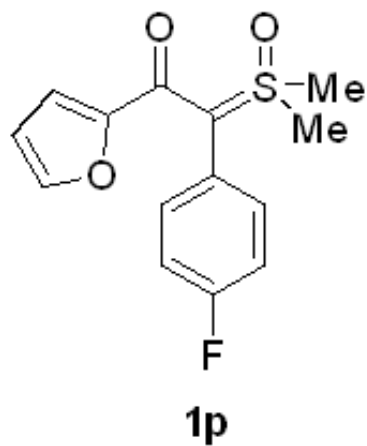

— -112.98

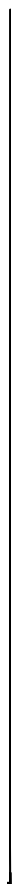

20 0 -20 -40 -60 -80 -100 -120 -140 -160 -180 -200 ppm

7.49  
7.48  
7.48  
7.47  
7.46  
7.46  
7.46  
7.45  
7.45  
7.44  
7.44  
7.30  
7.29  
7.29  
7.27  
7.27  
7.24  
7.23  
7.23  
7.22  
7.21  
7.21  
7.20  
7.16  
7.16  
7.14  
7.14  
7.13  
7.12  
3.71



NAME HNMR-gwg-1-27  
EXPNO 43  
PROCNO 1  
Date\_ 20210325  
Time 15.11  
INSTRUM spect  
PROBHD 5 mm PABBO BB-  
PULPROG zg30  
TD 65536  
SOLVENT CDCl3  
NS 6  
DS 2  
SWH 8223.685 Hz  
FIDRES 0.125483 Hz  
AQ 3.9846387 sec  
RG 100.49  
DW 60.800 usec  
DE 6.50 usec  
TE 293.7 K  
D1 1.00000000 sec  
TD0 1

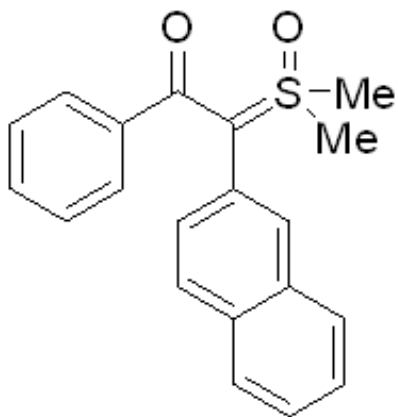

1q

==== CHANNEL f1 =====  
NUC1 1H  
P1 14.40 usec  
SI 65536  
SF 400.1900000 MHz  
WDW EM  
SSB 0  
LB 0.30 Hz  
GB 0  
PC 1.00

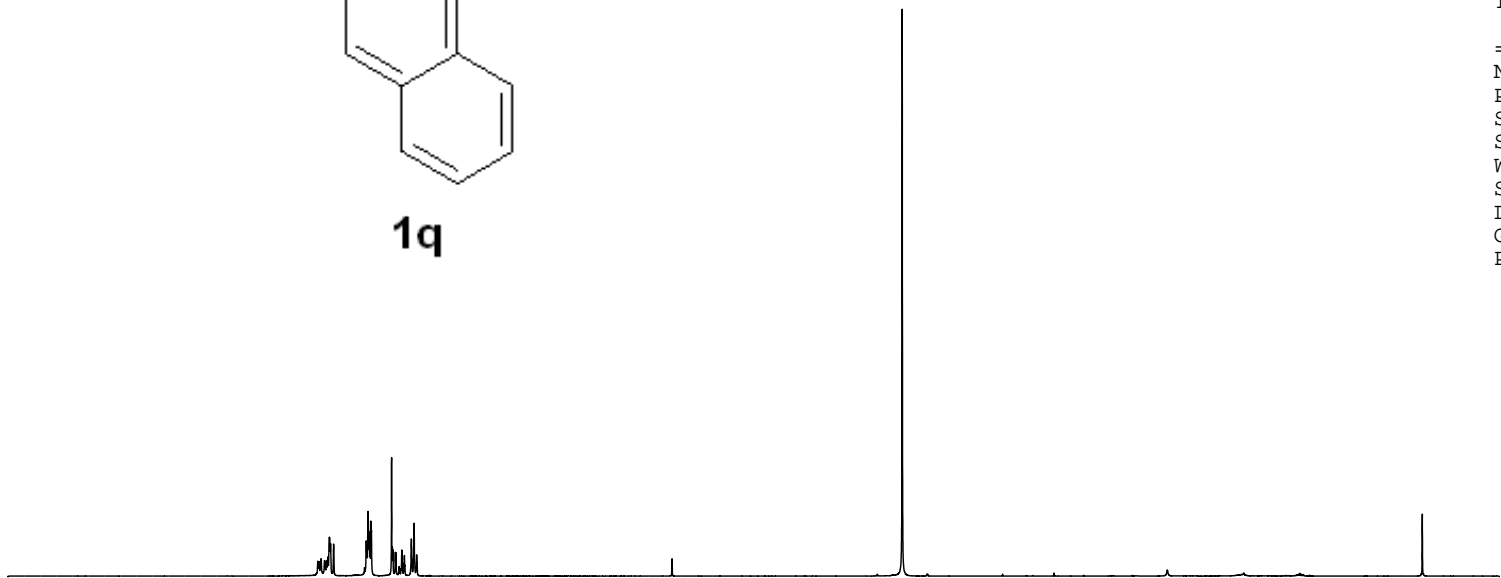

9 8 7 6 5 4 3 2 1 ppm

1.01  
2.97  
3.93  
1.43  
1.01  
1.93

6.00





NAME CNMR-gwg-1-27  
EXPNO 53  
PROCNO 1  
Date\_ 20210326  
Time 15.19  
INSTRUM spect  
PROBHD 5 mm PABBO BB-  
PULPROG zgpg30  
TD 65536  
SOLVENT CDCl3  
NS 33  
DS 4  
SWH 24038.461 Hz  
FIDRES 0.366798 Hz  
AQ 1.3631988 sec  
RG 193.13  
DW 20.800 usec  
DE 6.50 usec  
TE 294.5 K  
D1 2.00000000 sec  
D11 0.03000000 sec  
TD0 1

==== CHANNEL f1 =====  
NUC1 13C  
P1 9.90 usec  
SI 32768  
SF 100.6278560 MHz  
WDW EM  
SSB 0  
LB 1.00 Hz  
GB 0  
PC 1.40

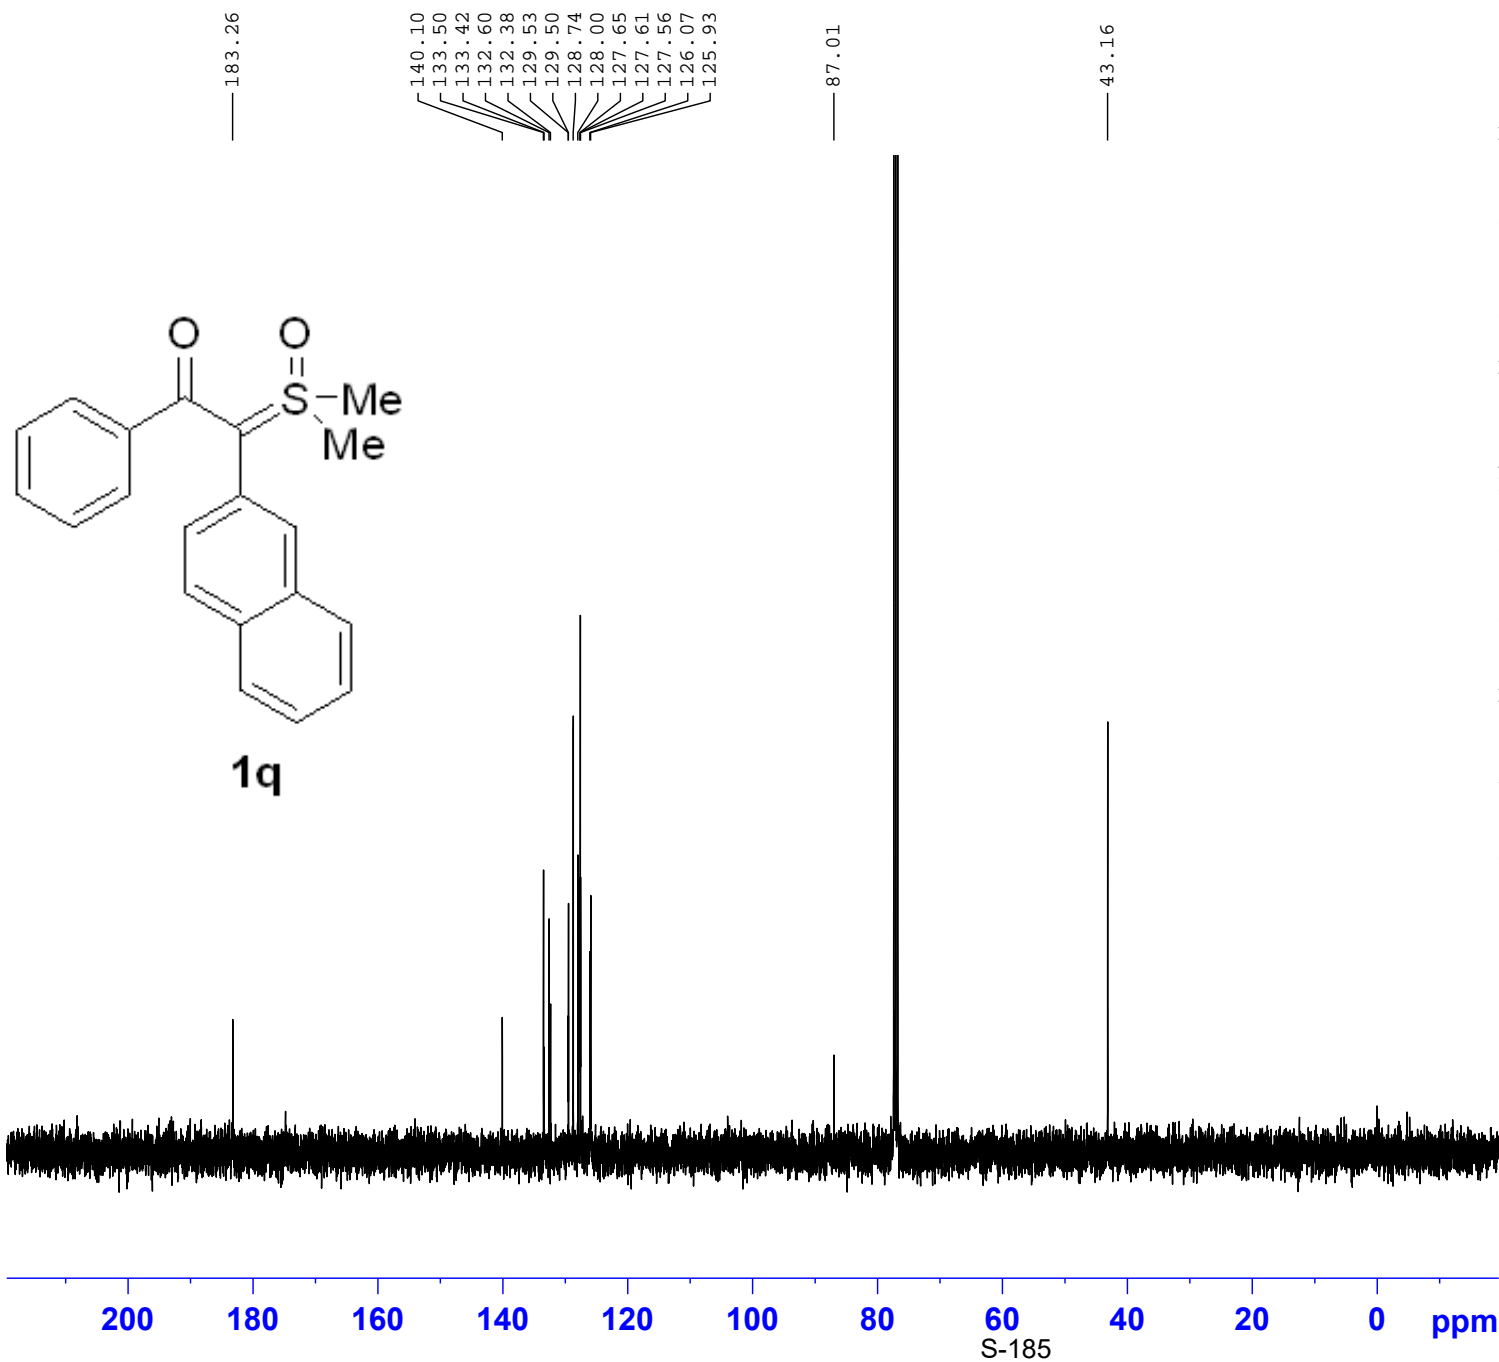

7.38  
7.36  
7.35  
7.34  
7.33  
7.27  
7.26  
7.25  
7.24  
7.24  
7.23  
7.22  
7.21  
7.17  
7.16  
7.16  
7.15  
7.14  
6.84  
6.84  
6.82  
6.81  
6.81  
6.79  
6.78

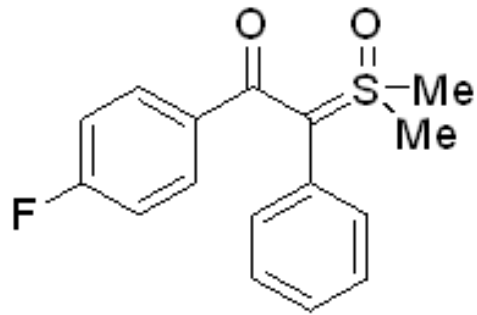

**1r**

3.61



```

NAME      HNMR-gwg-1-49-wm
EXPNO      5329
PROCNO      1
Date_      20210914
Time       11.04
INSTRUM    spect
PROBHD     5 mm PABBO BB-
PULPROG    zg30
TD         65536
SOLVENT    CDCl3
NS         16
DS         2
SWH        6009.615 Hz
FIDRES     0.091699 Hz
AQ         5.4526453 sec
RG         90.5
DW         83.200 usec
DE         6.50 usec
TE         -59.1 K
D1         1.00000000 sec
TD0        1
  
```

```

===== CHANNEL f1 =====
SFO1      300.1318534 MHz
NUC1       1H
P1         10.00 usec
SI         65536
SF         300.1300041 MHz
WDW        EM
SSB        0
LB         0.30 Hz
GB         0
PC         1.00
  
```

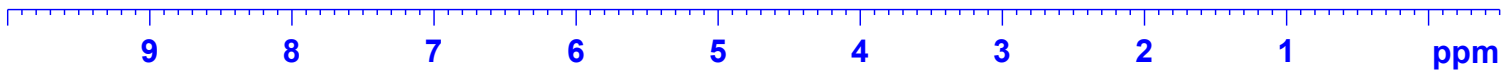

2.07  
2.92  
2.05  
2.01

6.00

S-186



NAME CNMR-gwg-1-49-wm  
EXPNO 5331  
PROCNO 1  
Date\_ 20210914  
Time 11.27  
INSTRUM spect  
PROBHD 5 mm PABBO BB-  
PULPROG zgpg30  
TD 65536  
SOLVENT CDCl3  
NS 300  
DS 4  
SWH 18028.846 Hz  
FIDRES 0.275098 Hz  
AQ 1.8175818 sec  
RG 203  
DW 27.733 usec  
DE 6.50 usec  
TE -59.1 K  
D1 2.00000000 sec  
D11 0.03000000 sec  
TD0 1

==== CHANNEL f1 =====  
SFO1 75.4752949 MHz  
NUC1 13C  
P1 9.50 usec  
SI 32768  
SF 75.4677485 MHz  
WDW EM  
SSB 0  
LB 1.00 Hz  
GB 0  
PC 1.40

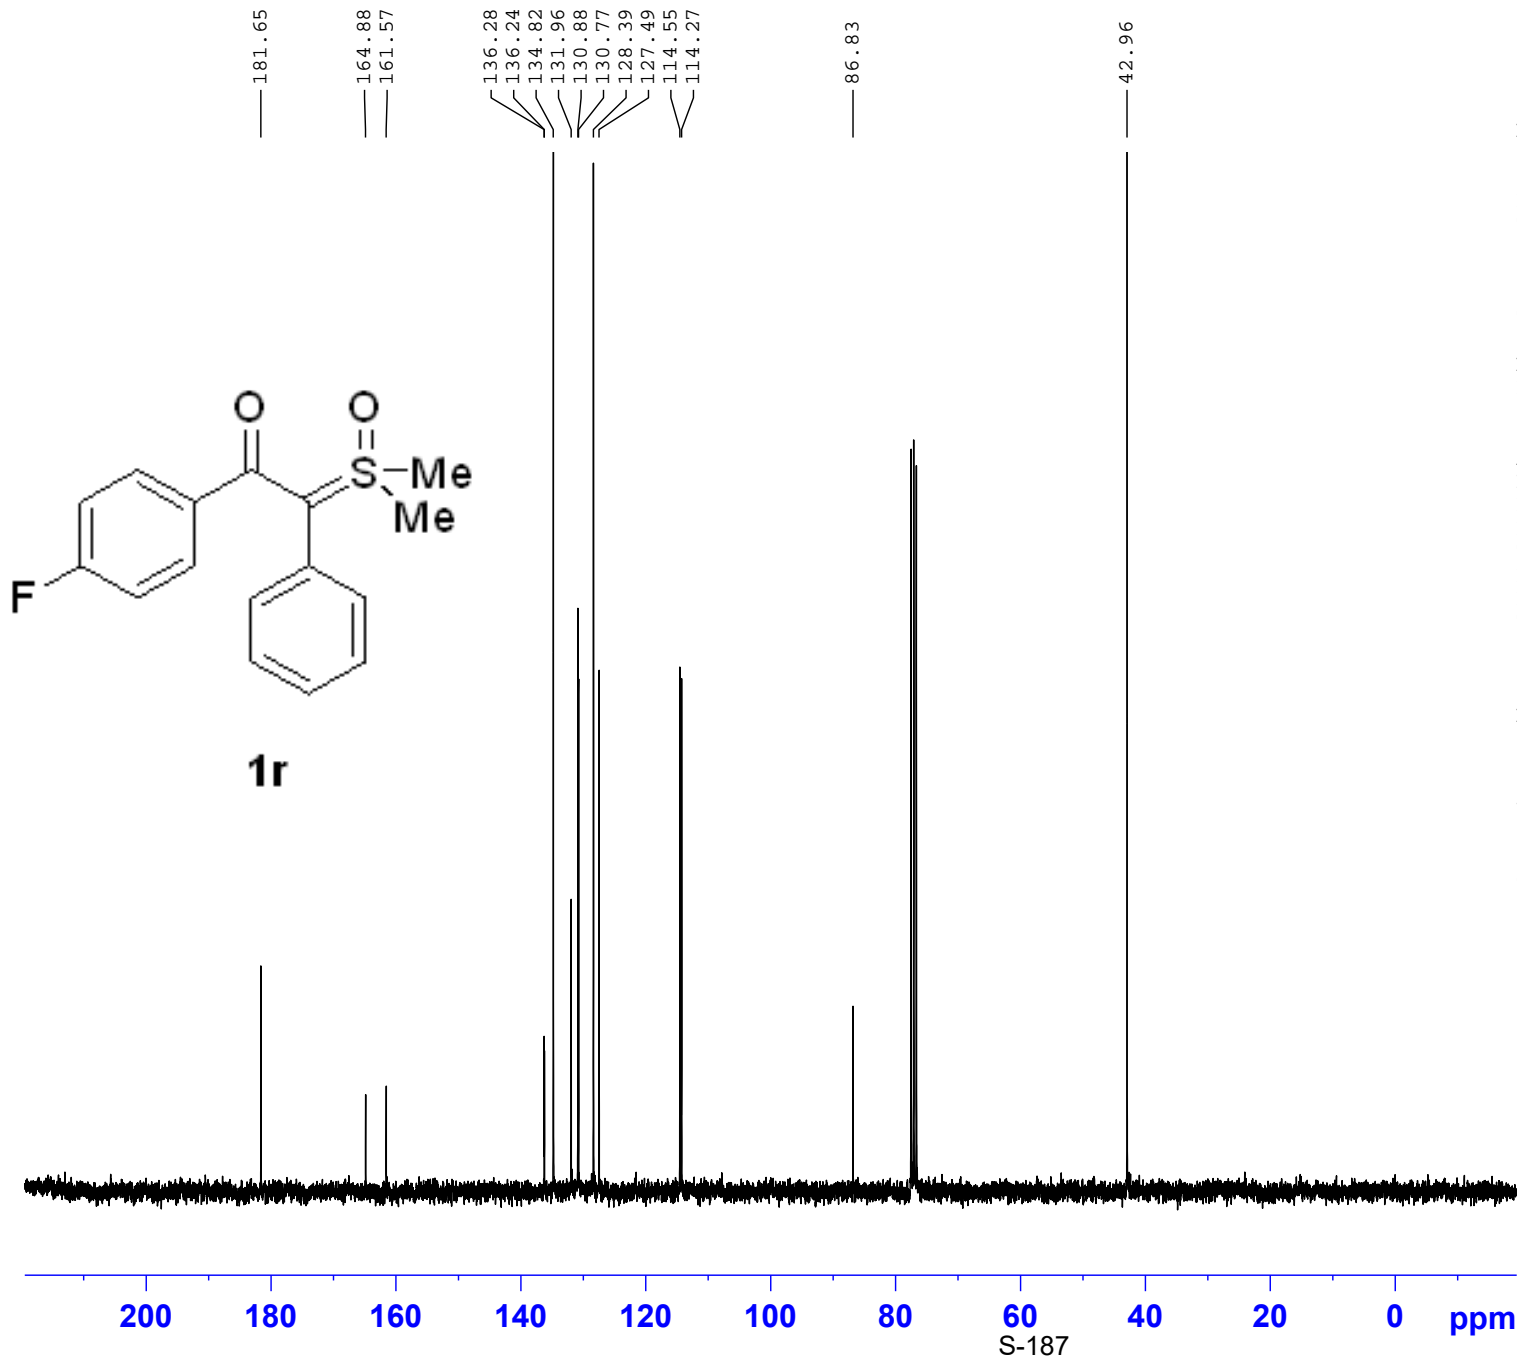



NAME FNMN-gwg-1-49-wm  
EXPNO 5330  
PROCNO 1  
Date\_ 20210914  
Time 11.06  
INSTRUM spect  
PROBHD 5 mm PABBO BB-  
PULPROG zgfhigqn.2  
TD 131072  
SOLVENT CDCl3  
NS 16  
DS 4  
SWH 66964.289 Hz  
FIDRES 0.510897 Hz  
AQ 0.9787210 sec  
RG 203  
DW 7.467 usec  
DE 6.50 usec  
TE -59.1 K  
D1 1.00000000 sec  
D11 0.03000000 sec  
D12 0.00002000 sec  
TD0 1

==== CHANNEL f1 =====  
SFO1 282.3761148 MHz  
NUC1 19F  
P1 14.50 usec  
SI 65536  
SF 282.4043552 MHz  
WDW EM  
SSB 0  
LB 0.30 Hz  
GB 0  
PC 1.00

— -111.17

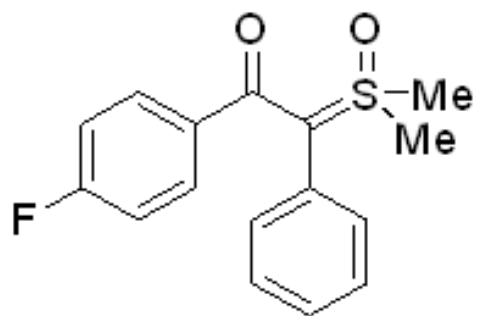

1r

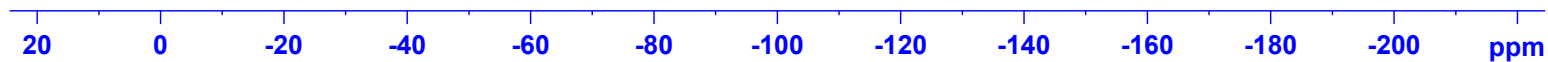

8.29  
8.26  
8.19  
8.17  
8.15  
8.12  
8.11  
8.10  
8.08  
8.04  
8.02  
8.00  
7.98  
7.85  
7.83  
6.06  
6.04  
5.91  
5.89

3.93  
3.91  
3.88  
3.86  
3.83  
3.80  
3.78  
3.75  
3.70  
3.67  
2.62  
2.59  
2.03  
1.99  
1.97  
1.95  
1.51  
1.01



NAME HNMR-gwg-3-90  
EXPNO 4859  
PROCNO 1  
Date\_ 20210727  
Time 10.50  
INSTRUM spect  
PROBHD 5 mm PABBO BB-  
PULPROG zg30  
TD 65536  
SOLVENT CDCl3  
NS 16  
DS 2  
SWH 6009.615 Hz  
FIDRES 0.091699 Hz  
AQ 5.4526453 sec  
RG 203  
DW 83.200 usec  
DE 6.50 usec  
TE 296.1 K  
D1 1.00000000 sec  
TD0 1

==== CHANNEL f1 =====  
SFO1 300.1318534 MHz  
NUC1 1H  
P1 10.00 usec  
SI 65536  
SF 300.1300093 MHz  
WDW EM  
SSB 0  
LB 0.30 Hz  
GB 0  
PC 1.00

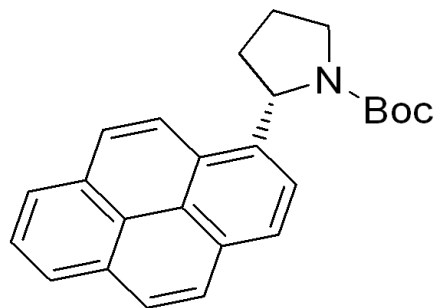

S2

rotamer ratio = 2:1

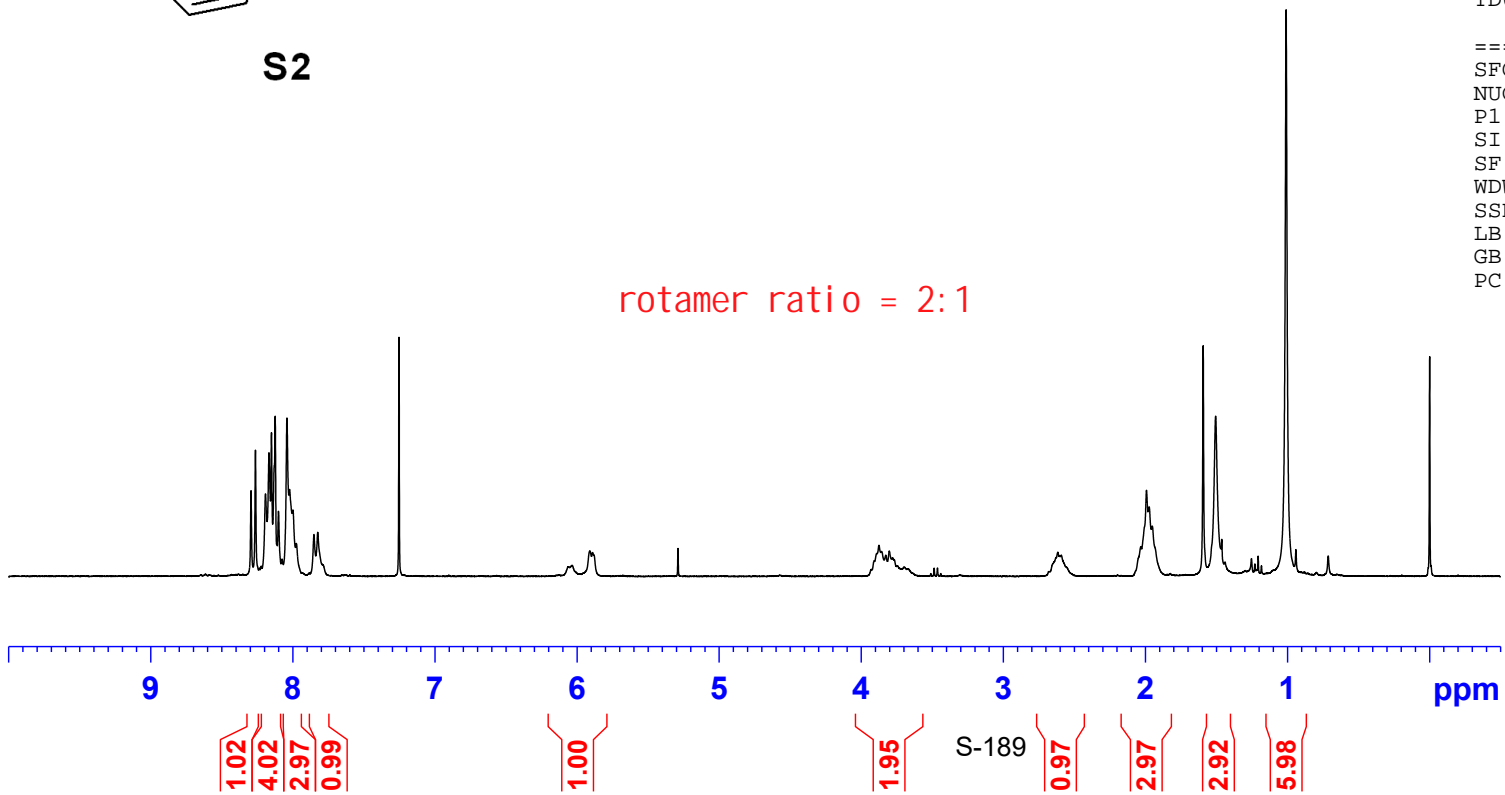

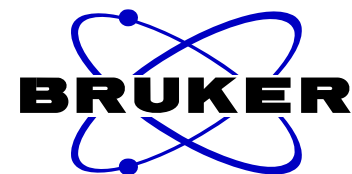

NAME HNMR-gwg-3-99  
EXPNO 4979  
PROCNO 1  
Date\_ 20210804  
Time 9.28  
INSTRUM spect  
PROBHD 5 mm PABBO BB-  
PULPROG zg30  
TD 65536  
SOLVENT DMSO  
NS 16  
DS 2  
SWH 6009.615 Hz  
FIDRES 0.091699 Hz  
AQ 5.4526453 sec  
RG 32  
DW 83.200 usec  
DE 6.50 usec  
TE 296.1 K  
D1 1.00000000 sec  
TD0 1

==== CHANNEL f1 =====  
SFO1 300.1318534 MHz  
NUC1 1H  
P1 10.00 usec  
SI 65536  
SF 300.1300000 MHz  
WDW EM  
SSB 0  
LB 0.30 Hz  
GB 0  
PC 1.00

10.36  
8.52  
8.49  
8.40  
8.37  
8.32  
8.20  
8.13  
8.09  
8.02  
7.83  
7.80  
7.75  
7.72  
7.57  
6.47  
6.45  
6.15  
6.14  
5.20  
4.31  
3.93  
2.59  
2.51  
2.02  
1.98  
1.95  
1.90  
1.07

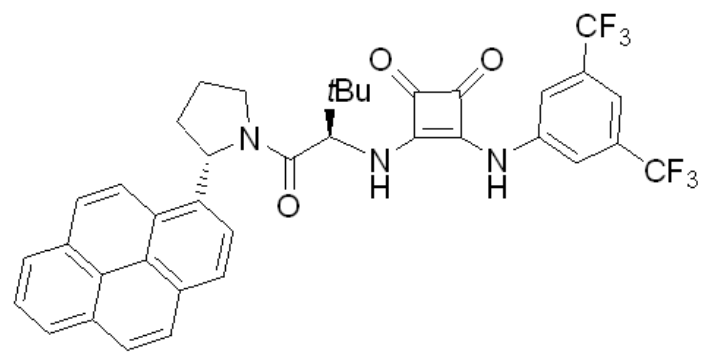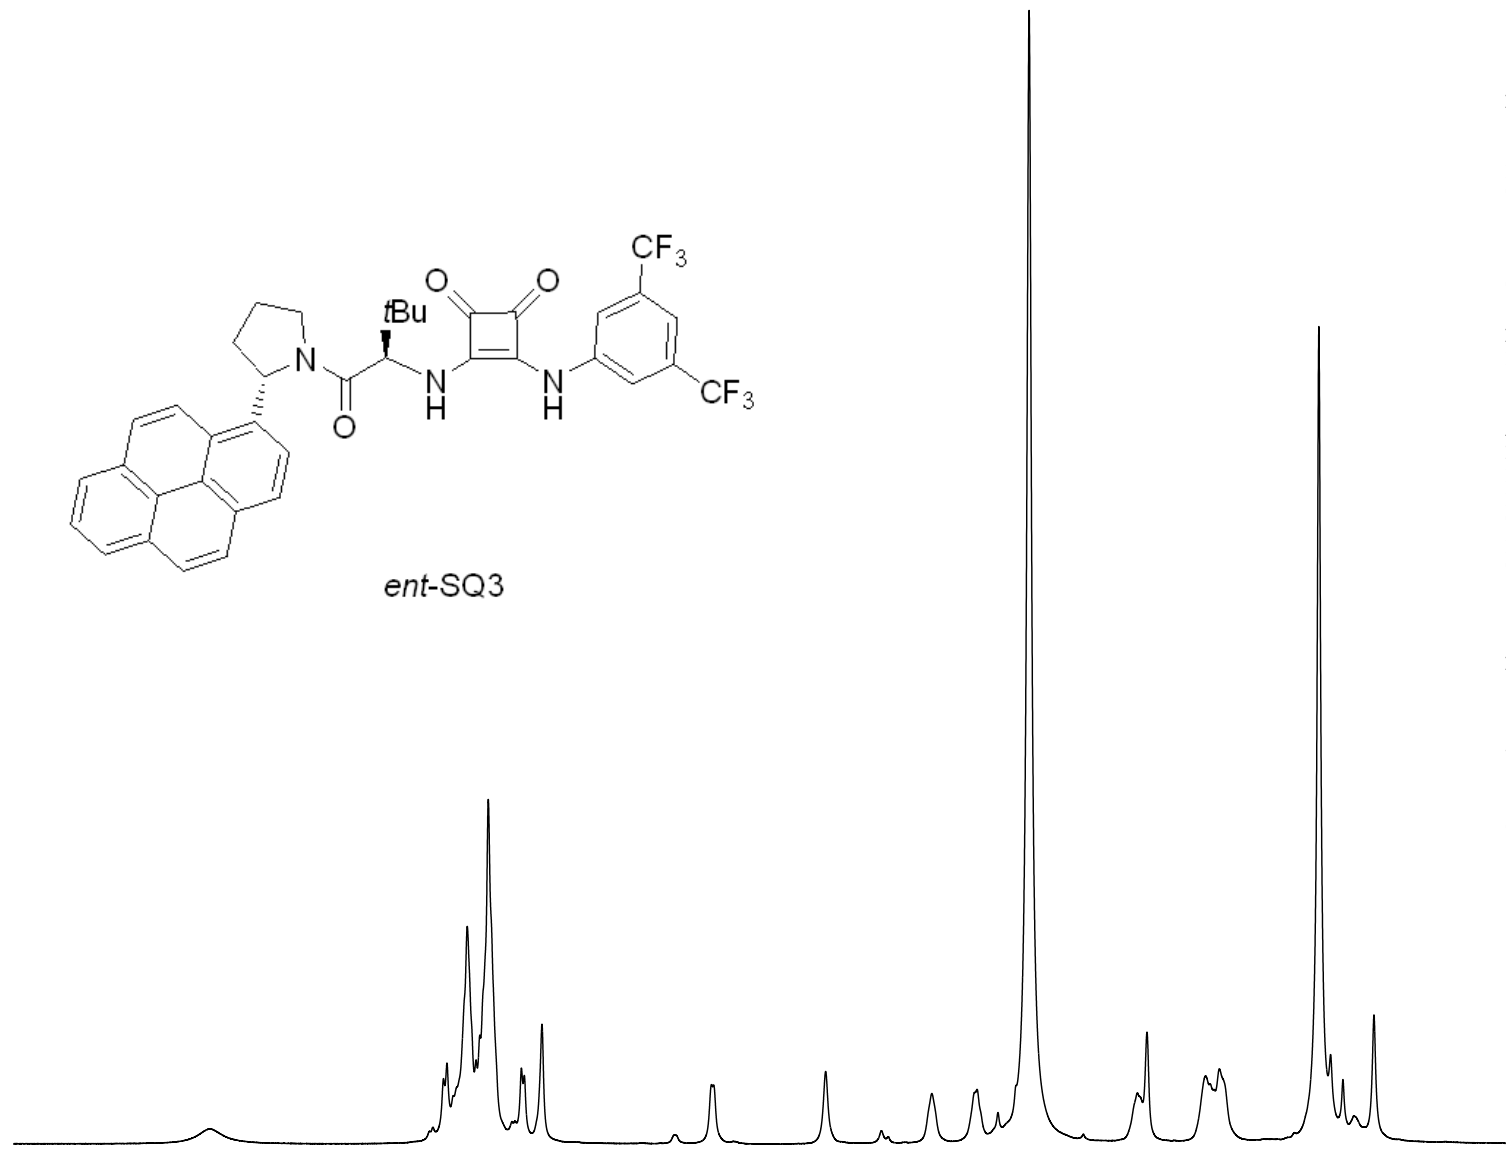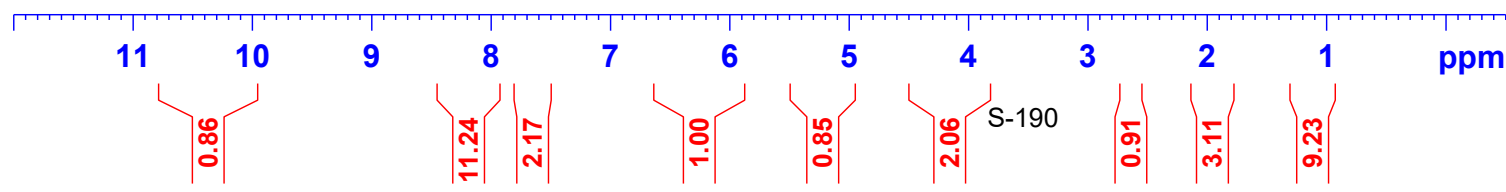

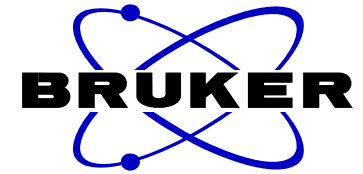

NAME HNMR-gwg-3-99  
EXPNO 5343  
PROCNO 1  
Date\_ 20210915  
Time 13.36  
INSTRUM spect  
PROBHD 5 mm PABBO BB-  
PULPROG zgpg30  
TD 65536  
SOLVENT DMSO  
NS 500  
DS 4  
SWH 18028.846 Hz  
FIDRES 0.275098 Hz  
AQ 1.8175818 sec  
RG 203  
DW 27.733 usec  
DE 6.50 usec  
TE -59.1 K  
D1 2.00000000 sec  
D11 0.03000000 sec  
TD0 1

==== CHANNEL f1 =====  
SFO1 75.4752949 MHz  
NUC1 13C  
P1 9.50 usec  
SI 32768  
SF 75.4677485 MHz  
WDW EM  
SSB 0  
LB 1.00 Hz  
GB 0  
PC 1.40

185.01  
181.03  
169.61  
168.49  
163.13  
141.50  
137.19  
132.03  
131.60  
131.27  
130.62  
129.95  
127.72  
127.12  
126.90  
126.60  
125.58  
125.46  
125.11  
124.67  
124.46  
123.44  
122.83  
121.78  
118.41  
115.20

61.85  
60.23  
58.77  
48.79  
36.21  
35.76  
34.03  
26.45  
26.24  
23.88

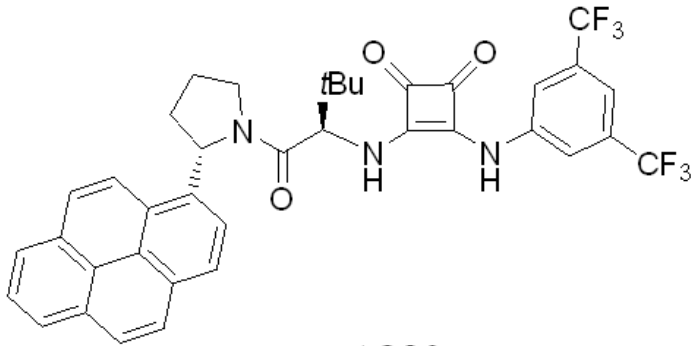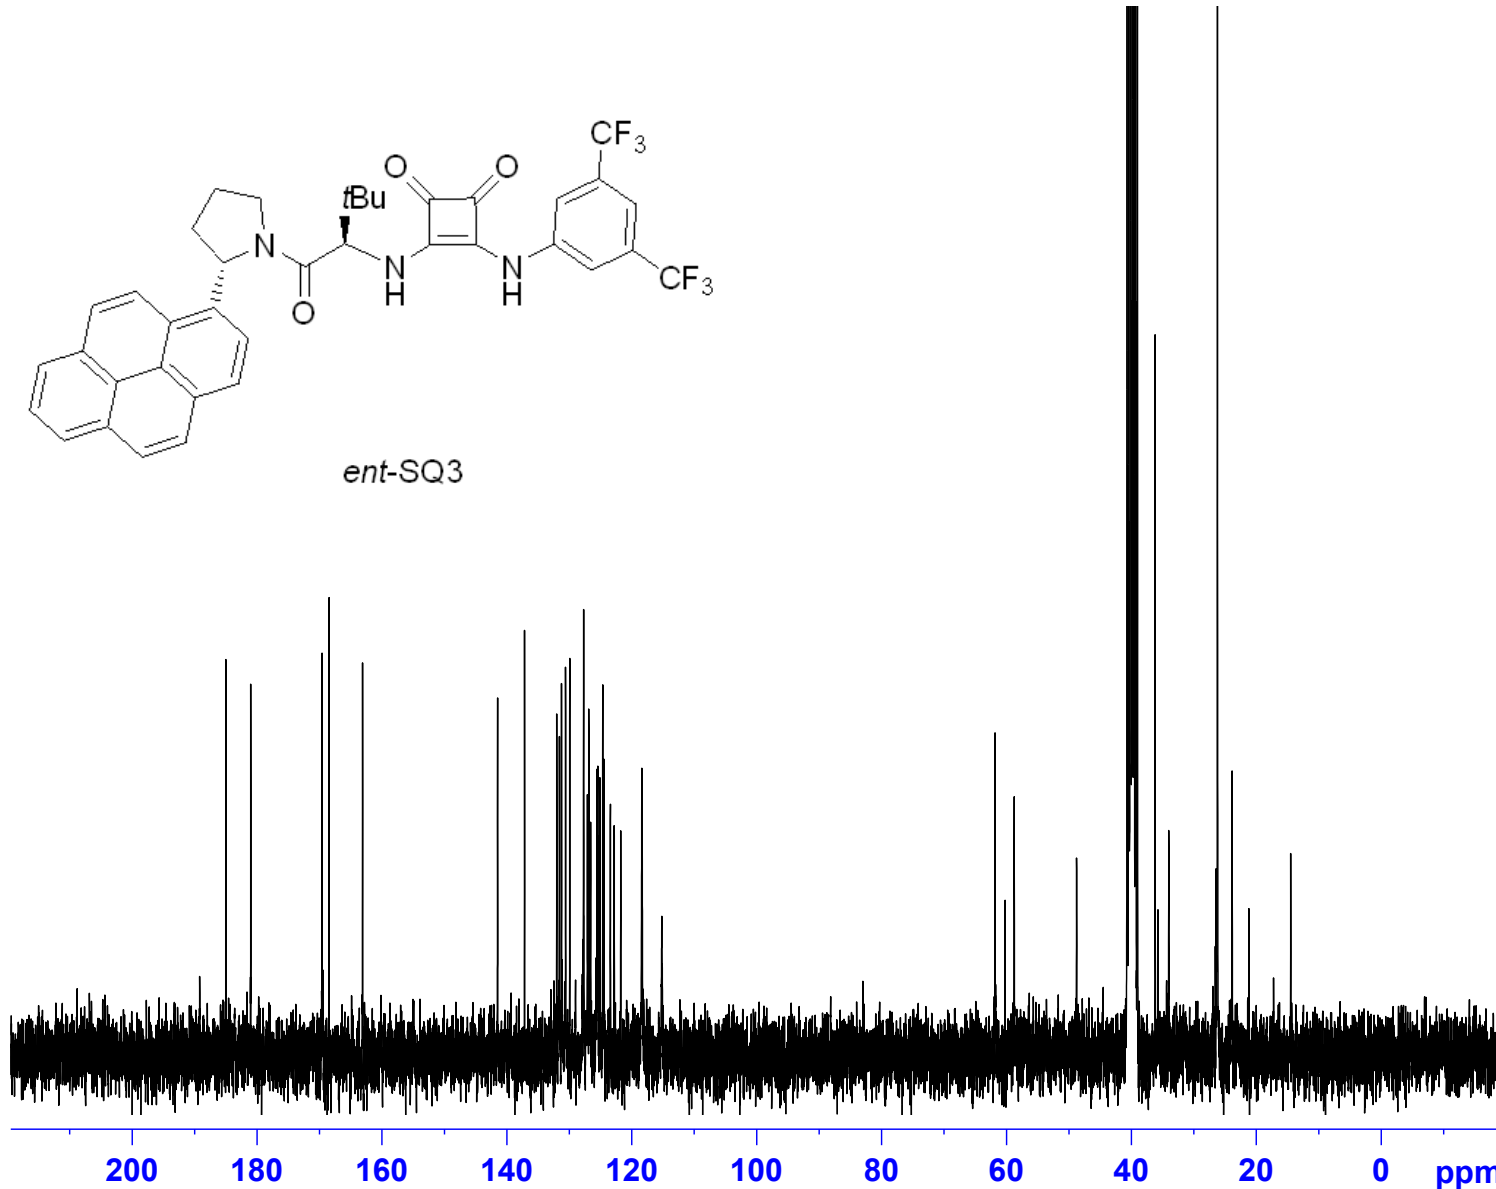

S-191



NAME HNMR-gwg-3-99  
EXPNO 5342  
PROCNO 1  
Date\_ 20210915  
Time 13.04  
INSTRUM spect  
PROBHD 5 mm PABBO BB-  
PULPROG zgfhigqn.2  
TD 131072  
SOLVENT DMSO  
NS 16  
DS 4  
SWH 66964.289 Hz  
FIDRES 0.510897 Hz  
AQ 0.9787210 sec  
RG 203  
DW 7.467 usec  
DE 6.50 usec  
TE -59.1 K  
D1 1.00000000 sec  
D11 0.03000000 sec  
D12 0.00002000 sec  
TD0 1

==== CHANNEL f1 =====  
SFO1 282.3761148 MHz  
NUC1 19F  
P1 14.50 usec  
SI 65536  
SF 282.4043552 MHz  
WDW EM  
SSB 0  
LB 0.30 Hz  
GB 0  
PC 1.00

-61.80  
-61.85

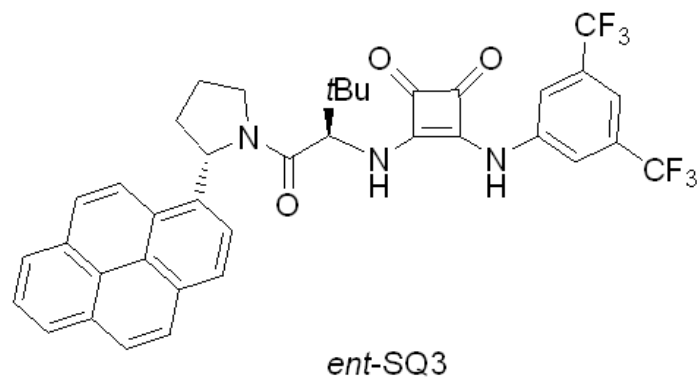

20 0 -20 -40 -60 -80 -100 -120 -140 -160 -180 -200 ppm

S-192



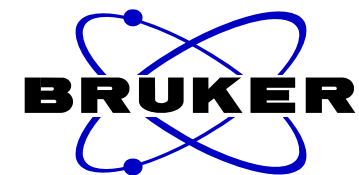

NAME HNMR-gwg-9-93-1  
EXPNO 1  
PROCNO 1  
Date\_ 20201120  
Time 14.36  
INSTRUM spect  
PROBHD 5 mm PABBO BB/  
PULPROG zg30  
TD 65536  
SOLVENT CDCl3  
NS 4  
DS 0  
SWH 8012.820 Hz  
FIDRES 0.122266 Hz  
AQ 4.0894966 sec  
RG 34.77  
DW 62.400 usec  
DE 6.50 usec  
TE 296.9 K  
D1 1.00000000 sec  
TD0 1

==== CHANNEL f1 =====  
SFO1 400.1324710 MHz  
NUC1 1H  
P1 14.50 usec  
SI 65536  
SF 400.1300154 MHz  
WDW EM  
SSB 0  
LB 0.30 Hz  
GB 0  
PC 1.00

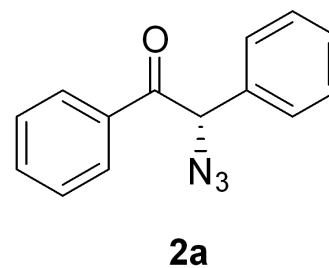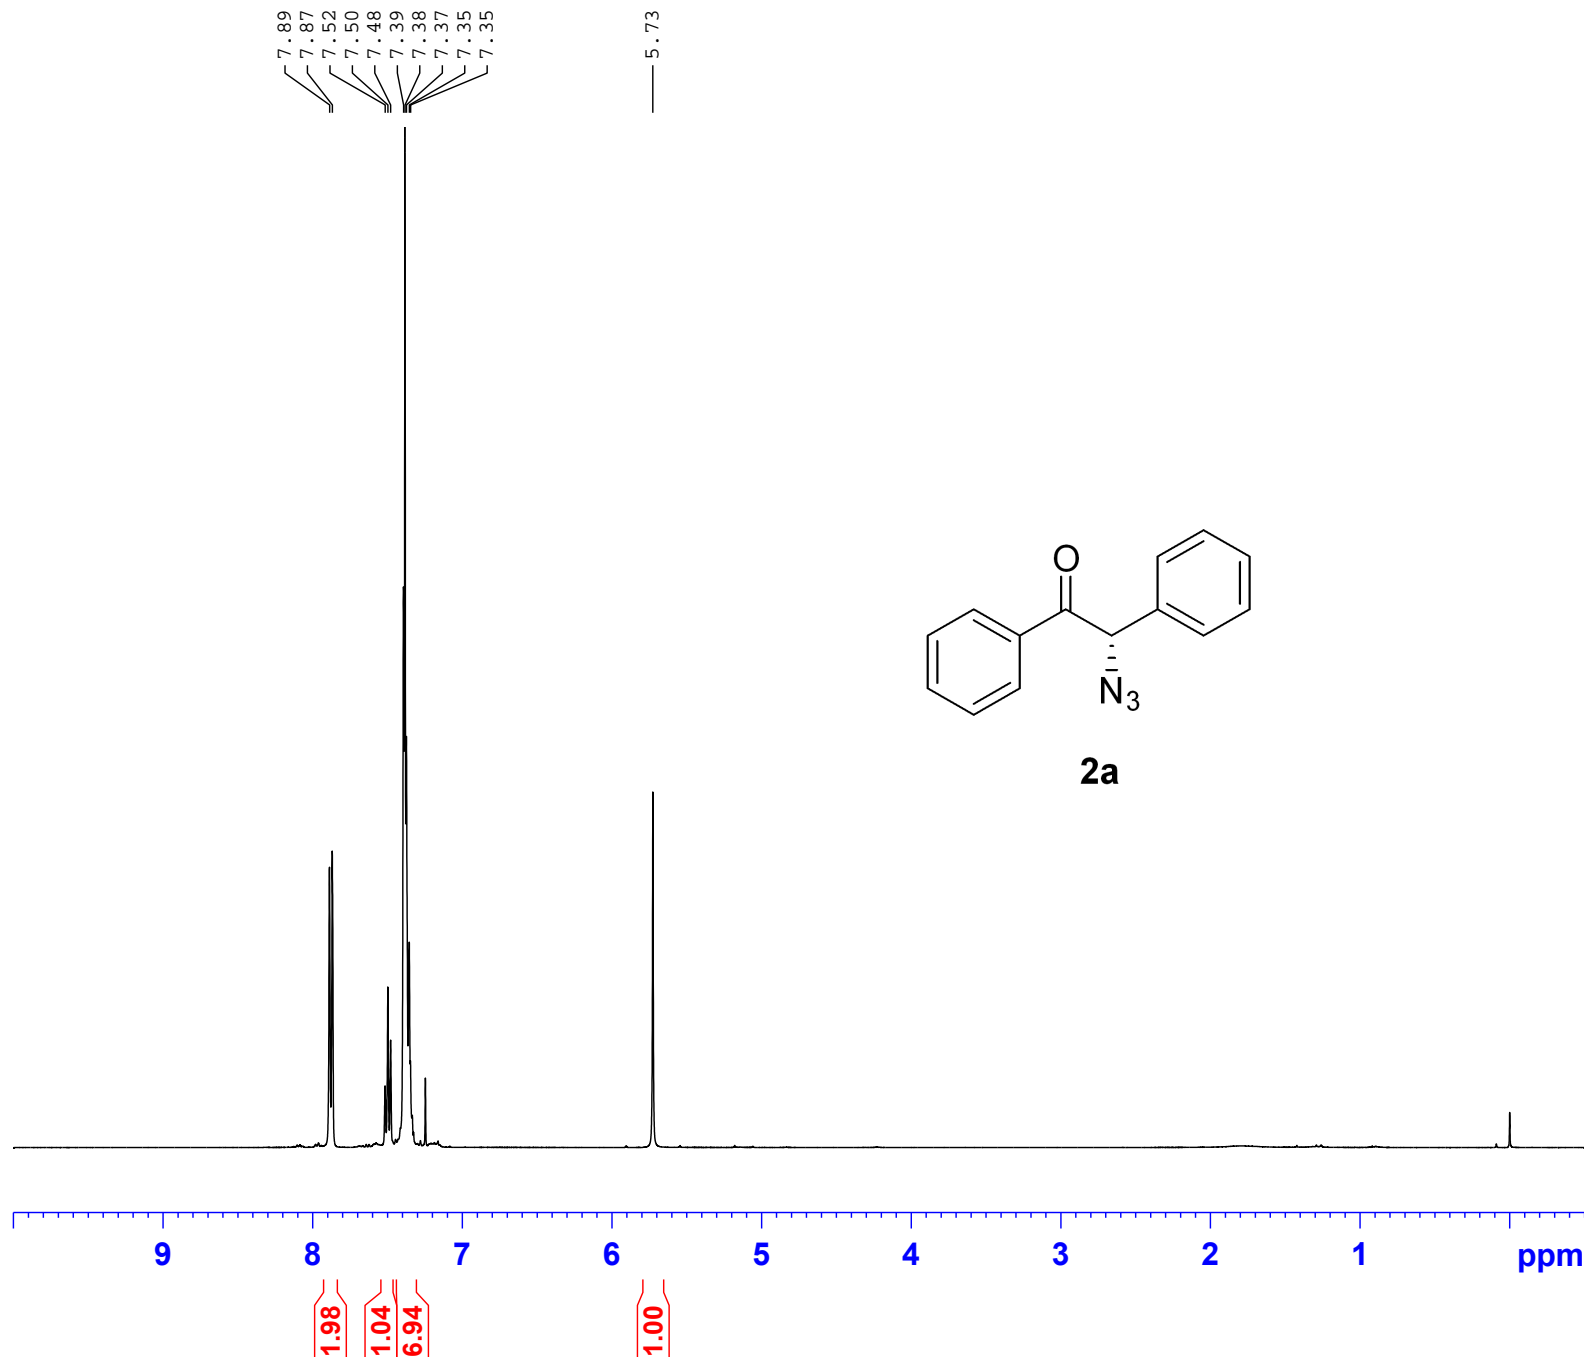

— 194.41

134.32  
133.82  
129.60  
129.43  
128.90  
128.82  
128.34

— 67.90

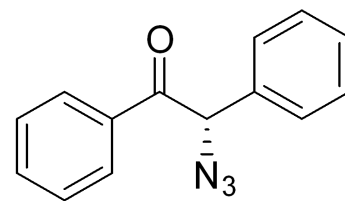

2a

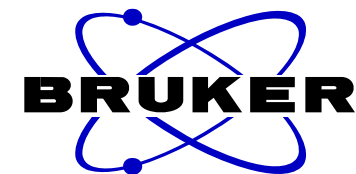

NAME CNMR-gwg-9-93-1  
EXPNO 1  
PROCNO 1  
Date\_ 20201120  
Time 14.38  
INSTRUM spect  
PROBHD 5 mm PABBO BB/  
PULPROG zgpg30  
TD 65536  
SOLVENT CDCl3  
NS 5  
DS 0  
SWH 24038.461 Hz  
FIDRES 0.366798 Hz  
AQ 1.3631988 sec  
RG 196.92  
DW 20.800 usec  
DE 6.50 usec  
TE 297.0 K  
D1 2.00000000 sec  
D11 0.03000000 sec  
TD0 1

==== CHANNEL f1 =====  
SF01 100.6228298 MHz  
NUC1 13C  
P1 9.70 usec  
SI 32768  
SF 100.6127690 MHz  
WDW EM  
SSB 0  
LB 1.00 Hz  
GB 0  
PC 1.40

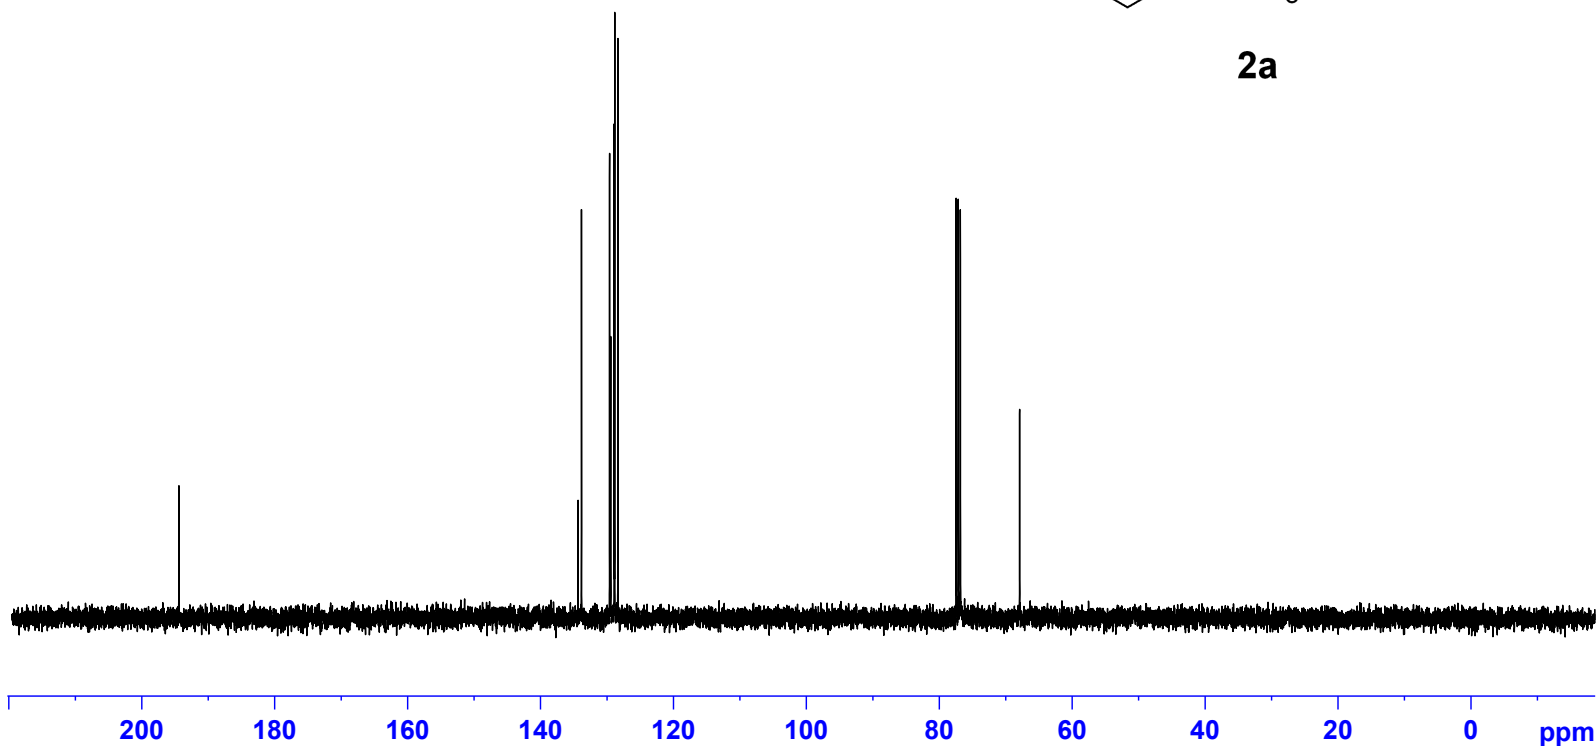

7.89  
7.57  
7.55  
7.48  
7.48  
7.46  
7.43  
7.42  
7.41  
7.41  
7.33  
7.31  
7.29  
7.28  
7.27  
7.26  
7.21  
7.21  
7.19  
7.17  
7.17  
6.11



NAME HNMR-gwg-2-66  
EXPNO 1  
PROCNO 1  
Date\_ 20210609  
Time 23.35 h  
INSTRUM Avance  
PROBHD z116098\_0833 (  
PULPROG zg30  
TD 65536  
SOLVENT Acetone  
NS 16  
DS 2  
SWH 8196.722 Hz  
FIDRES 0.250144 Hz  
AQ 3.9977460 sec  
RG 52.6316  
DW 61.000 usec  
DE 13.54 usec  
TE 294.7 K  
D1 1.00000000 sec  
TD0 1  
SFO1 400.1324708 MHz  
NUC1 1H  
P0 3.33 usec  
P1 10.00 usec  
SI 65536  
SF 400.1300716 MHz  
WDW EM  
SSB 0  
LB 0.30 Hz  
GB 0  
PC 1.00

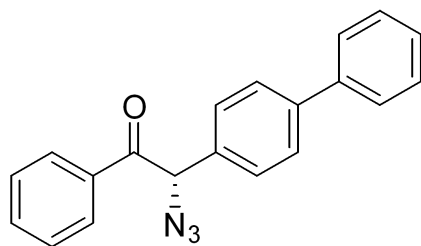

2b

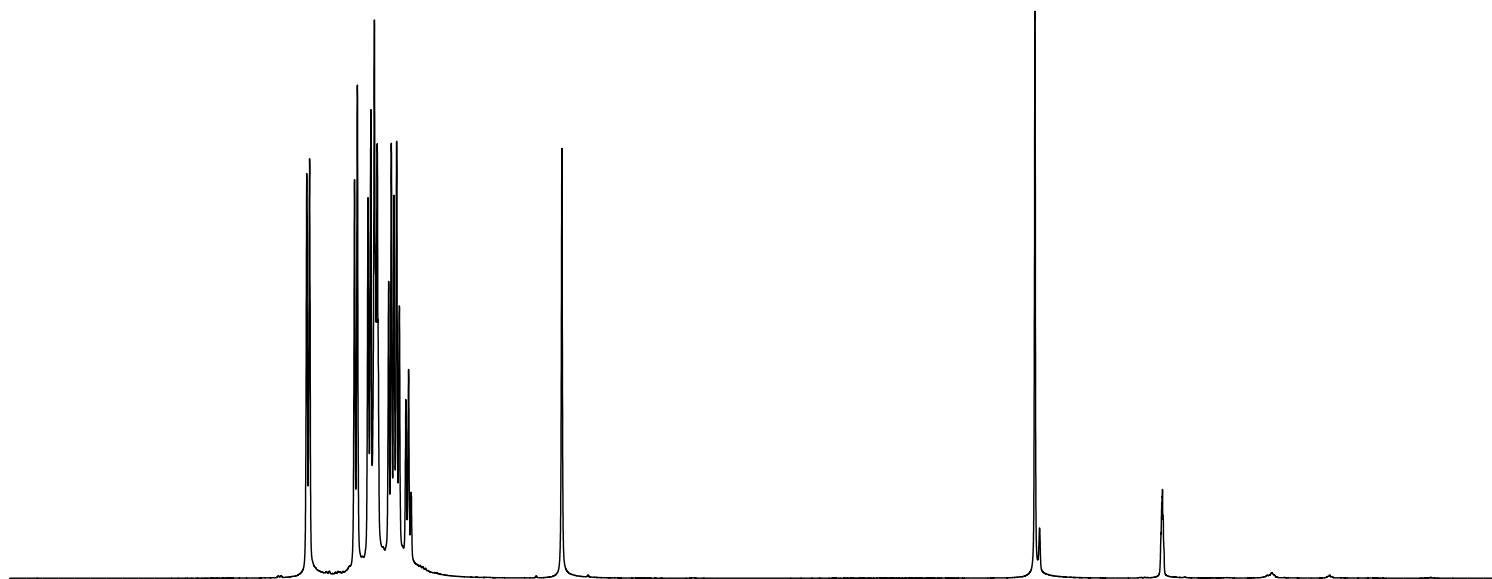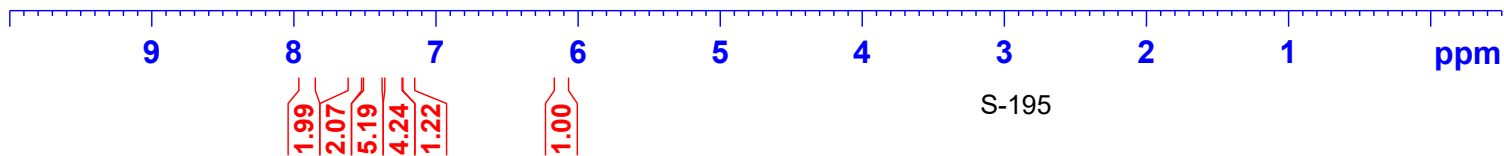

S-195



NAME CNMR-gwg-2-66  
EXPNO 2  
PROCNO 1  
Date\_ 20210609  
Time 23.47 h  
INSTRUM Avance  
PROBHD z116098\_0833 (  
PULPROG zgpg30  
TD 65536  
SOLVENT Acetone  
NS 200  
DS 4  
SWH 23809.523 Hz  
FIDRES 0.726609 Hz  
AQ 1.3763061 sec  
RG 51.55  
DW 21.000 usec  
DE 6.50 usec  
TE 295.1 K  
D1 2.00000000 sec  
D11 0.03000000 sec  
TD0 1  
SFO1 100.6228298 MHz  
NUC1 13C  
P0 3.33 usec  
P1 10.00 usec  
SI 32768  
SF 100.6127685 MHz  
WDW EM  
SSB 0  
LB 1.00 Hz  
GB 0  
PC 1.40

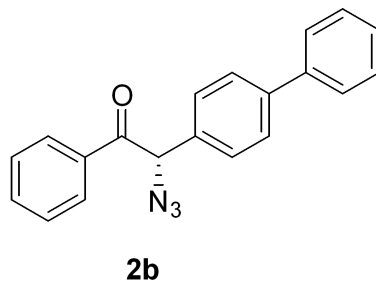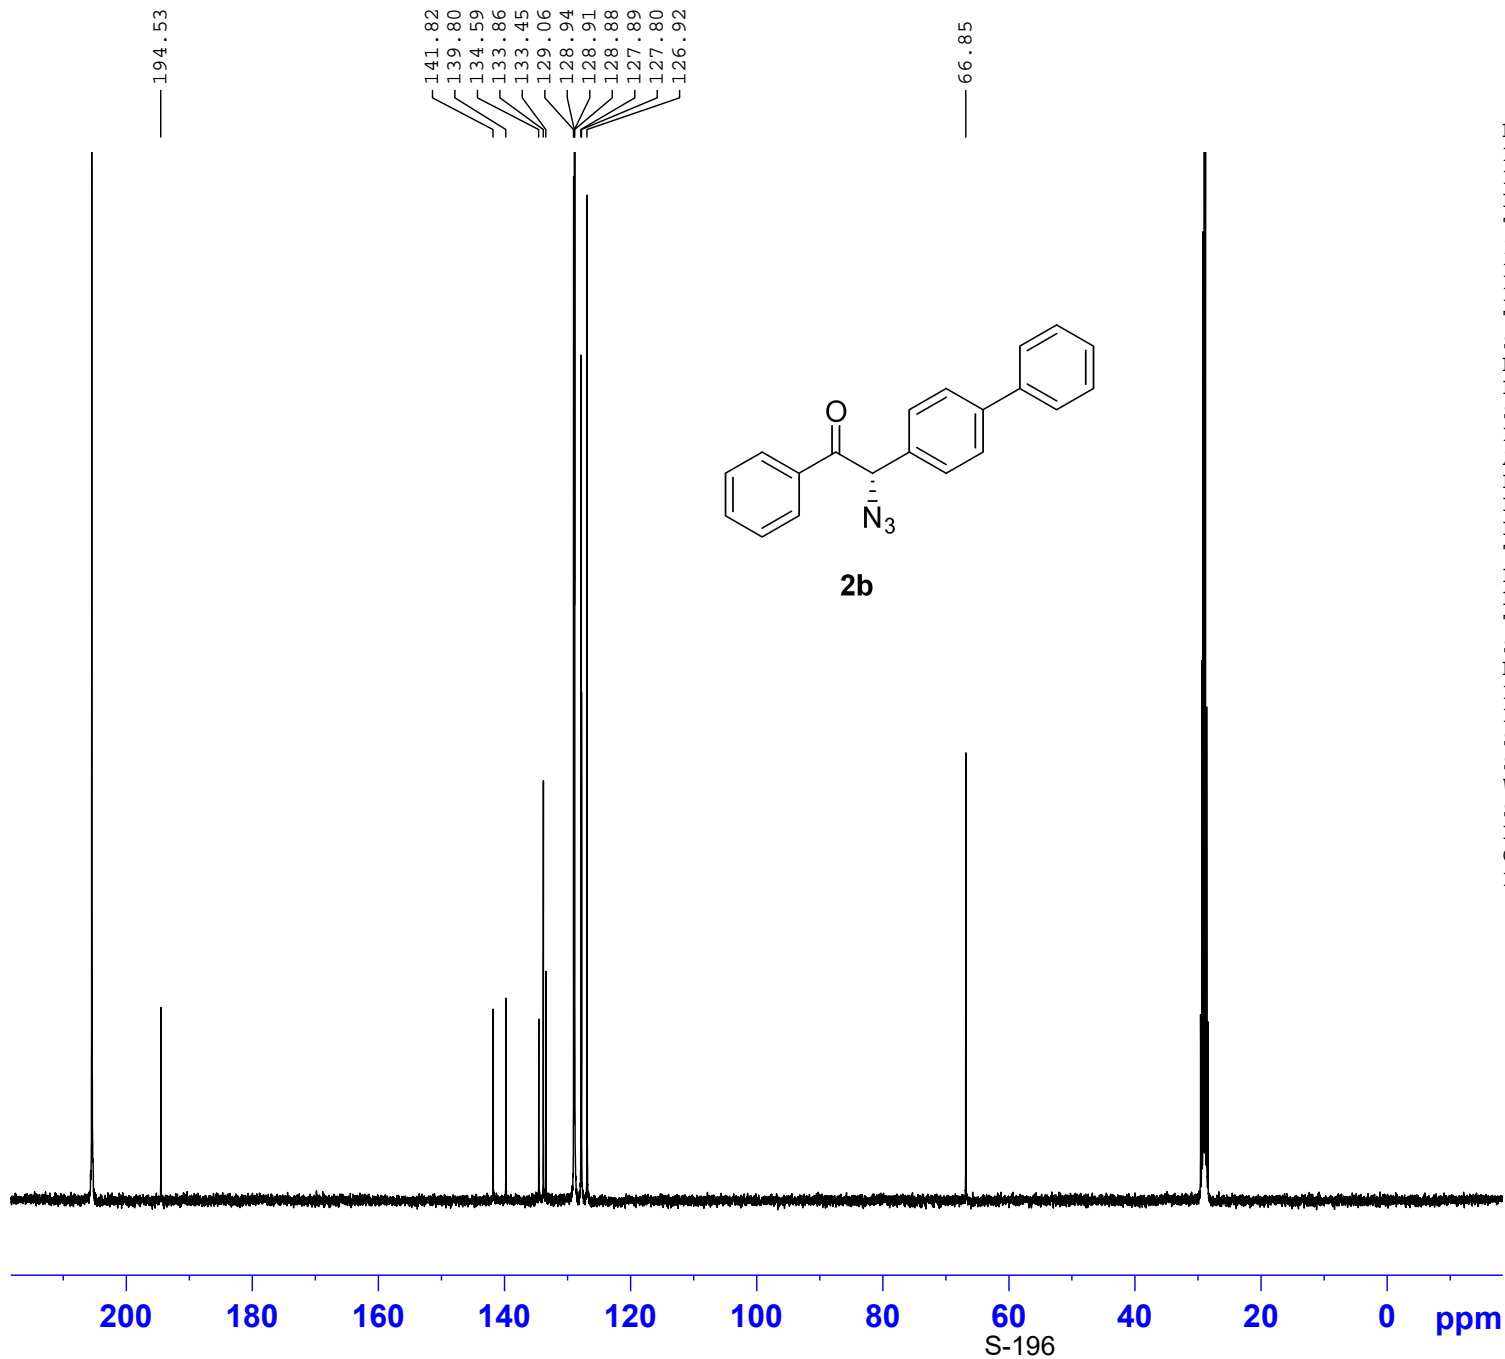

8.07  
8.05  
7.66  
7.64  
7.62  
7.57  
7.56  
7.56  
7.54  
7.52  
7.50  
7.44  
7.43  
7.43  
6.32



NAME HNMR-gwg-2-45  
EXPNO 173  
PROCNO 1  
Date\_ 20210601  
Time 14.31  
INSTRUM spect  
PROBHD 5 mm PABBO BB-  
PULPROG zg30  
TD 65536  
SOLVENT Acetone  
NS 6  
DS 2  
SWH 8223.685 Hz  
FIDRES 0.125483 Hz  
AQ 3.9846387 sec  
RG 113.67  
DW 60.800 usec  
DE 6.50 usec  
TE 294.9 K  
D1 1.00000000 sec  
TD0 1

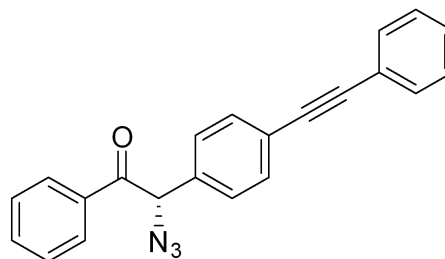

2c

==== CHANNEL f1 =====  
NUC1 1H  
P1 14.40 usec  
SI 65536  
SF 400.1900000 MHz  
WDW EM  
SSB 0  
LB 0.30 Hz  
GB 0  
PC 1.00

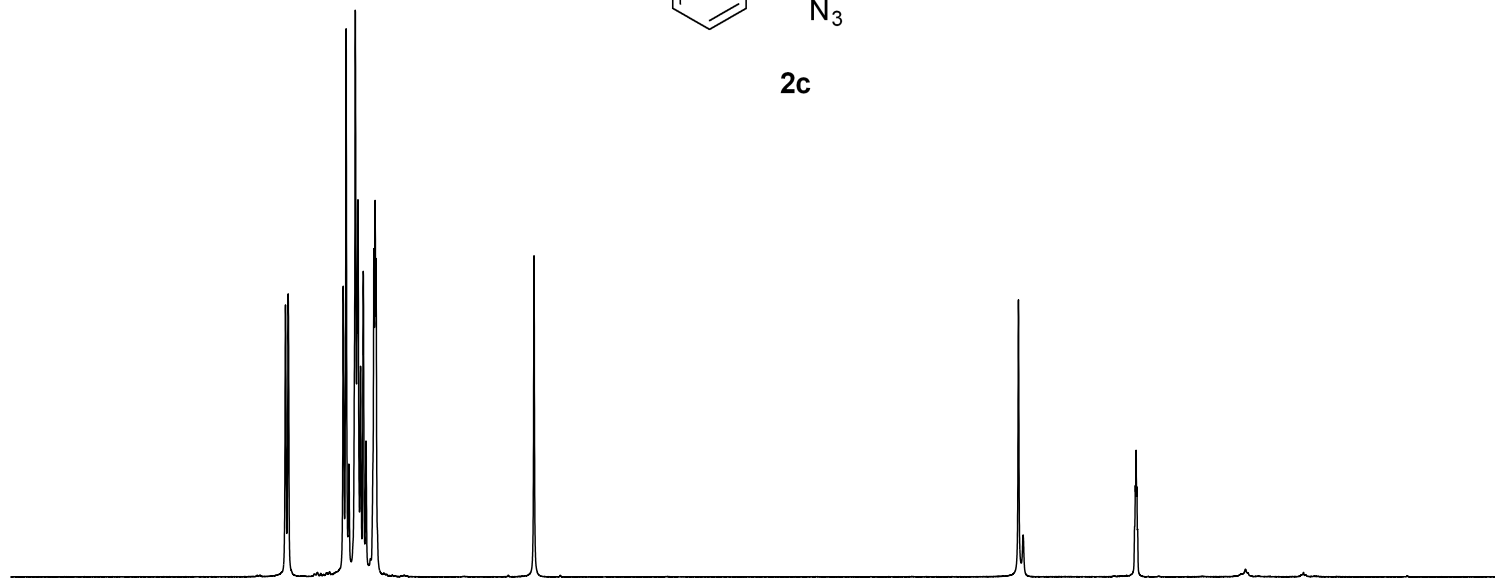

9 8 7 6 5 4 3 2 1 ppm

1.99  
3.03  
5.95  
2.95  
1.00

S-197



NAME CNMR-gwg-2-45  
EXPNO 174  
PROCNO 1  
Date\_ 20210601  
Time 14.39  
INSTRUM spect  
PROBHD 5 mm PABBO BB-  
PULPROG zgpg30  
TD 65536  
SOLVENT Acetone  
NS 101  
DS 4  
SWH 24038.461 Hz  
FIDRES 0.366798 Hz  
AQ 1.3631988 sec  
RG 193.13  
DW 20.800 usec  
DE 6.50 usec  
TE 295.3 K  
D1 2.00000000 sec  
D11 0.03000000 sec  
TD0 1

==== CHANNEL f1 =====  
NUC1 13C  
P1 9.90 usec  
SI 32768  
SF 100.6278560 MHz  
WDW EM  
SSB 0  
LB 1.00 Hz  
GB 0  
PC 1.40

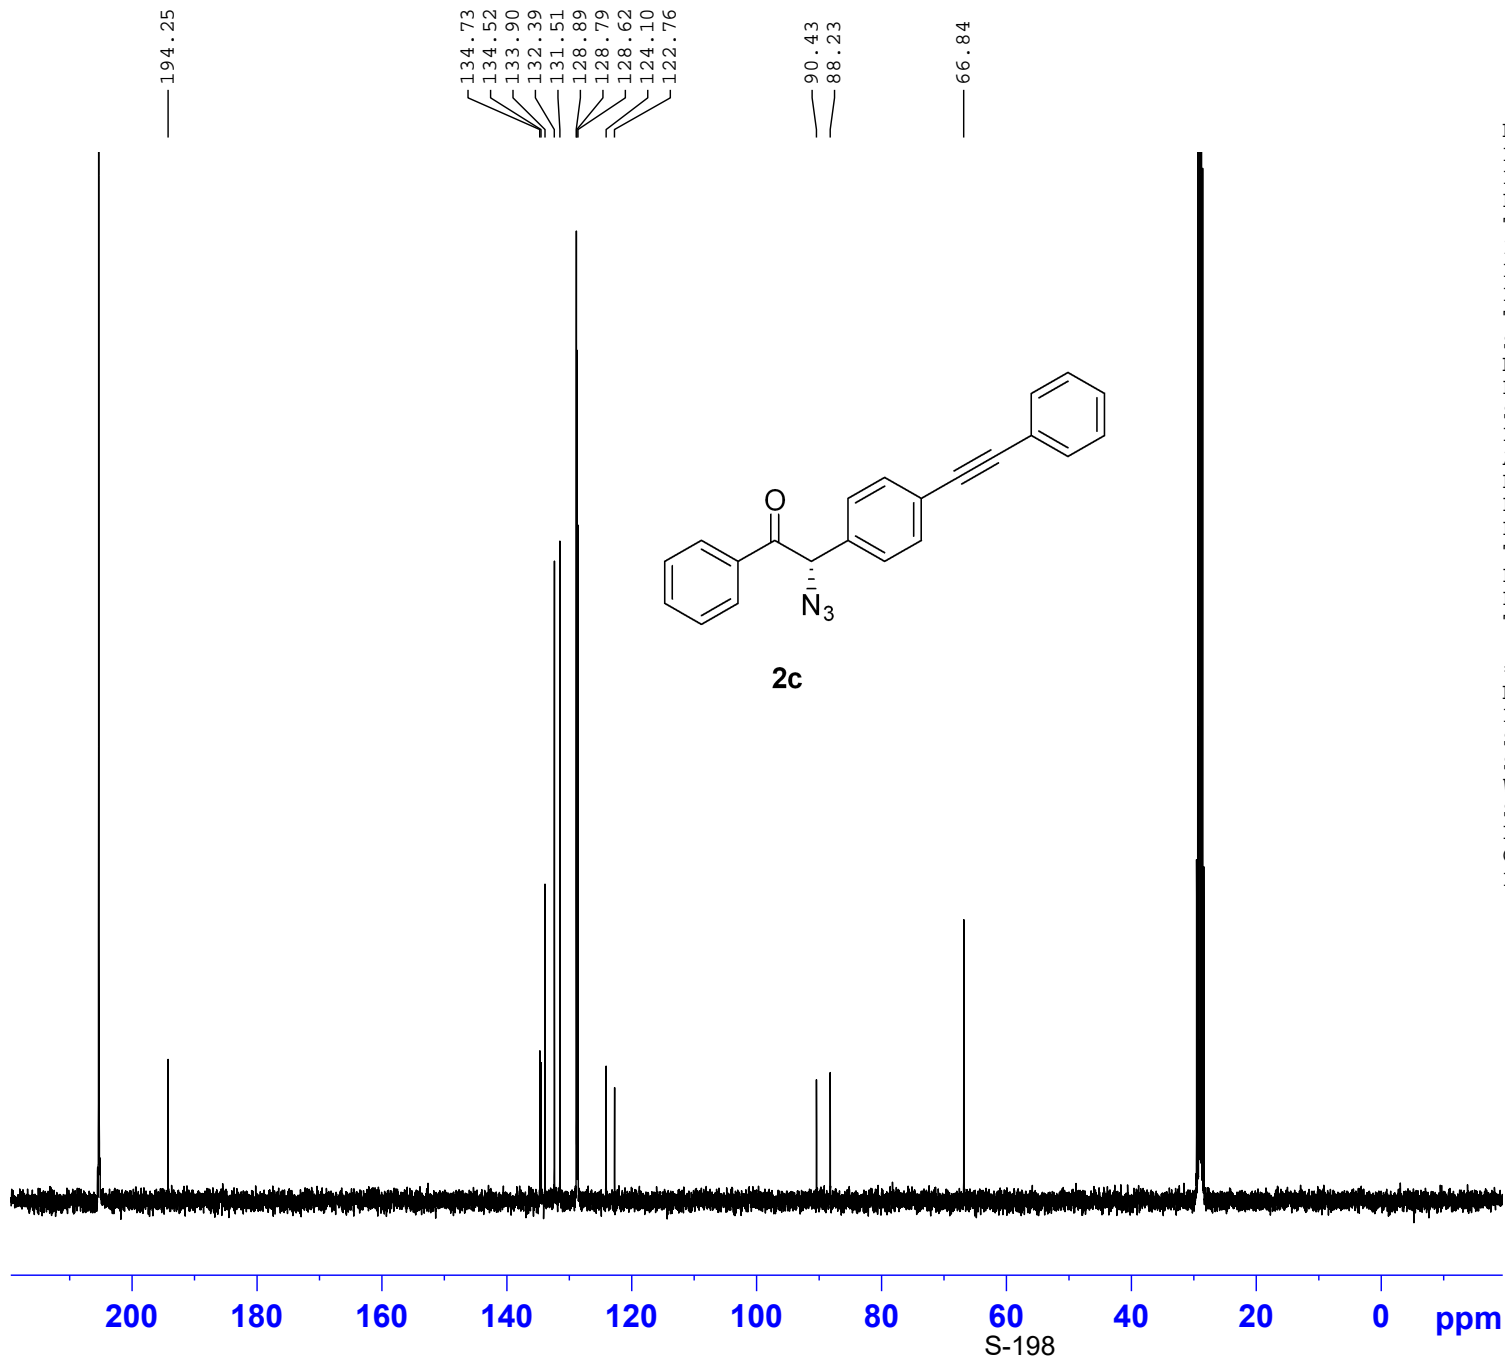

7.85  
7.84  
7.84  
7.44  
7.44  
7.44  
7.43  
7.42  
7.42  
7.41  
7.40  
7.40  
7.32  
7.32  
7.30  
7.29  
7.29  
7.22  
7.22  
7.20  
7.20  
7.10  
7.08  
6.00

— 2.13

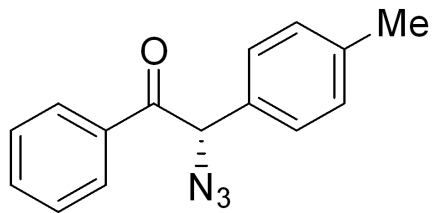

2d

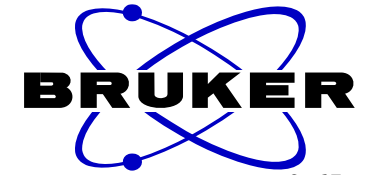

NAME HNMR-gwg-2-67  
EXPNO 5  
PROCNO 1  
Date\_ 20210610  
Time 0.09 h  
INSTRUM Avance  
PROBHD z116098\_0833 (  
PULPROG zg30  
TD 65536  
SOLVENT Acetone  
NS 16  
DS 2  
SWH 8196.722 Hz  
FIDRES 0.250144 Hz  
AQ 3.9977460 sec  
RG 50  
DW 61.000 usec  
DE 13.54 usec  
TE 294.6 K  
D1 1.00000000 sec  
TD0 1  
SFO1 400.1324708 MHz  
NUC1 1H  
P0 3.33 usec  
P1 10.00 usec  
SI 65536  
SF 400.1300675 MHz  
WDW EM  
SSB 0  
LB 0.30 Hz  
GB 0  
PC 1.00

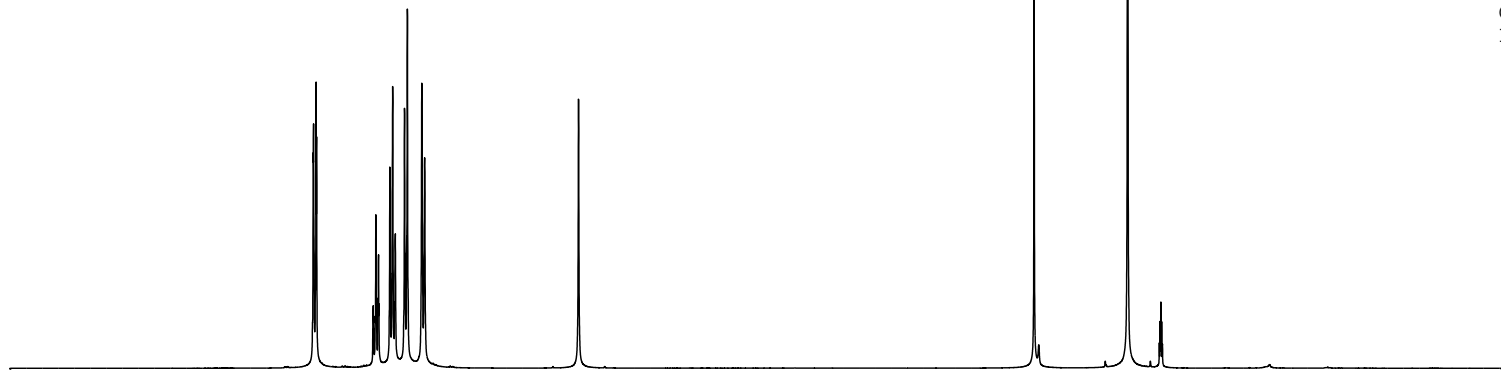

9

8

7

6

5

4

3

2

1

ppm

1.95  
1.00  
1.98  
1.96  
1.99

1.00

S-199

3.04



NAME CNMR-gwg-2-67  
EXPNO 6  
PROCNO 1  
Date\_ 20210610  
Time 0.21 h  
INSTRUM Avance  
PROBHD z116098\_0833 (  
PULPROG zgpg30  
TD 65536  
SOLVENT Acetone  
NS 200  
DS 4  
SWH 23809.523 Hz  
FIDRES 0.726609 Hz  
AQ 1.3763061 sec  
RG 50.1934  
DW 21.000 usec  
DE 6.50 usec  
TE 295.3 K  
D1 2.00000000 sec  
D11 0.03000000 sec  
TD0 1  
SFO1 100.6228298 MHz  
NUC1 13C  
P0 3.33 usec  
P1 10.00 usec  
SI 32768  
SF 100.6127685 MHz  
WDW EM  
SSB 0  
LB 1.00 Hz  
GB 0  
PC 1.40

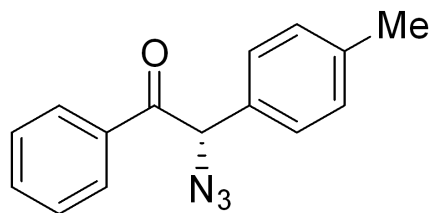

2d

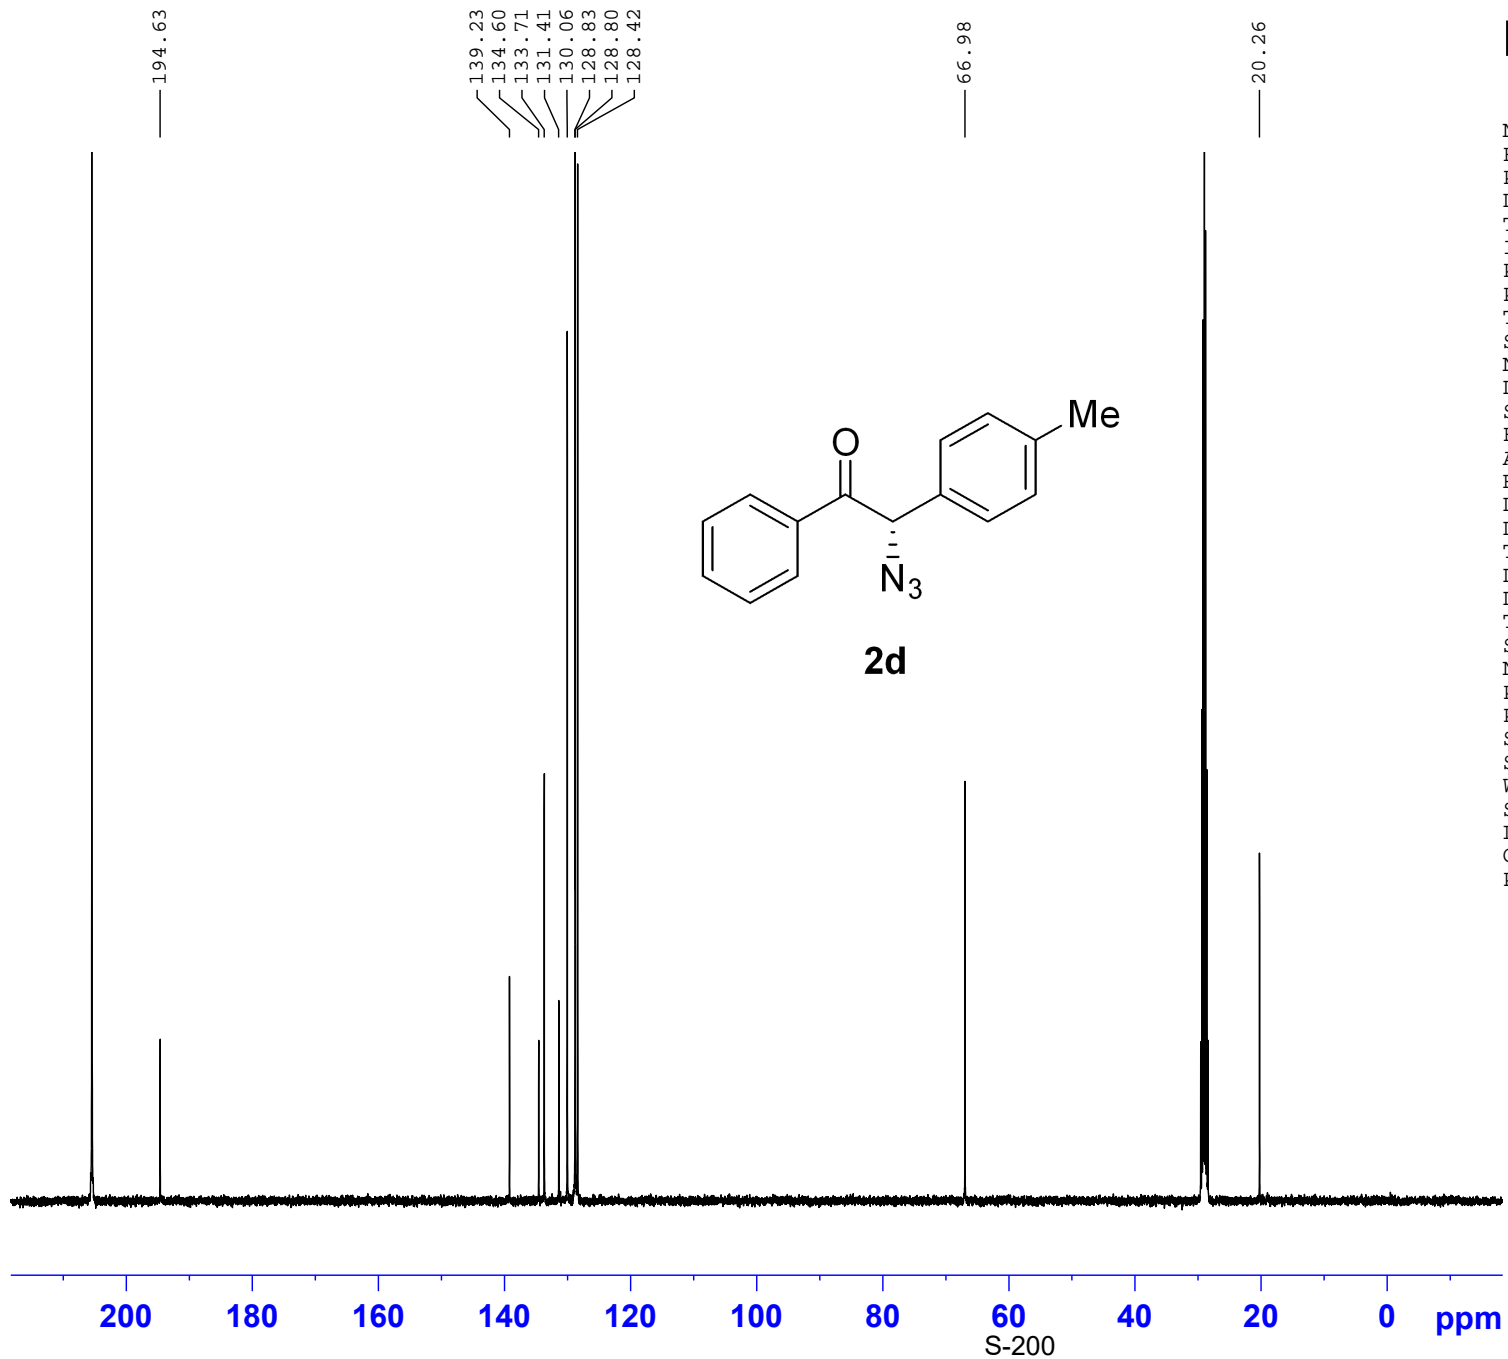



7.88  
7.86  
7.46  
7.44  
7.42  
7.34  
7.32  
7.30  
6.94  
6.88  
— 5.94

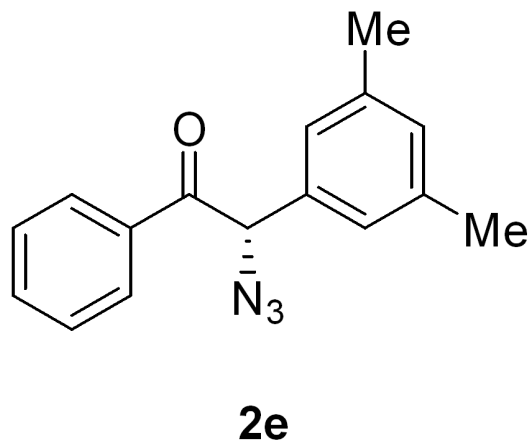

— 2.13



NAME HNMR-gwg-3-28  
EXPNO 3  
PROCNO 1  
Date\_ 20210630  
Time 6.37 h  
INSTRUM Avance  
PROBHD z116098\_0833 (  
PULPROG zg30  
TD 65536  
SOLVENT Acetone  
NS 16  
DS 2  
SWH 8196.722 Hz  
FIDRES 0.250144 Hz  
AQ 3.9977460 sec  
RG 72.8863  
DW 61.000 usec  
DE 13.54 usec  
TE 294.7 K  
D1 1.00000000 sec  
TD0 1  
SFO1 400.1324708 MHz  
NUC1 1H  
P0 3.33 usec  
P1 10.00 usec  
SI 65536  
SF 400.1300627 MHz  
WDW EM  
SSB 0  
LB 0.30 Hz  
GB 0  
PC 1.00

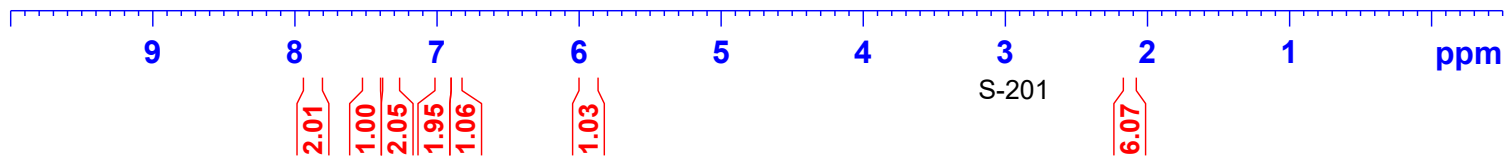



NAME CNMR-gwg-3-28  
EXPNO 4  
PROCNO 1  
Date\_ 20210630  
Time 6.48 h  
INSTRUM Avance  
PROBHD z116098\_0833 (  
PULPROG zgpg30  
TD 65536  
SOLVENT Acetone  
NS 160  
DS 4  
SWH 23809.523 Hz  
FIDRES 0.726609 Hz  
AQ 1.3763061 sec  
RG 48.6724  
DW 21.000 usec  
DE 6.50 usec  
TE 295.2 K  
D1 2.00000000 sec  
D11 0.03000000 sec  
TD0 1  
SFO1 100.6228298 MHz  
NUC1 13C  
P0 3.33 usec  
P1 10.00 usec  
SI 32768  
SF 100.6127685 MHz  
WDW EM  
SSB 0  
LB 1.00 Hz  
GB 0  
PC 1.40

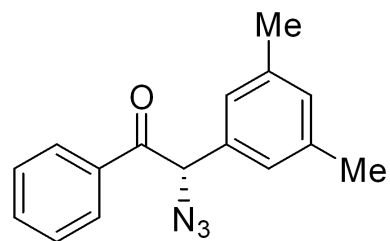

2e

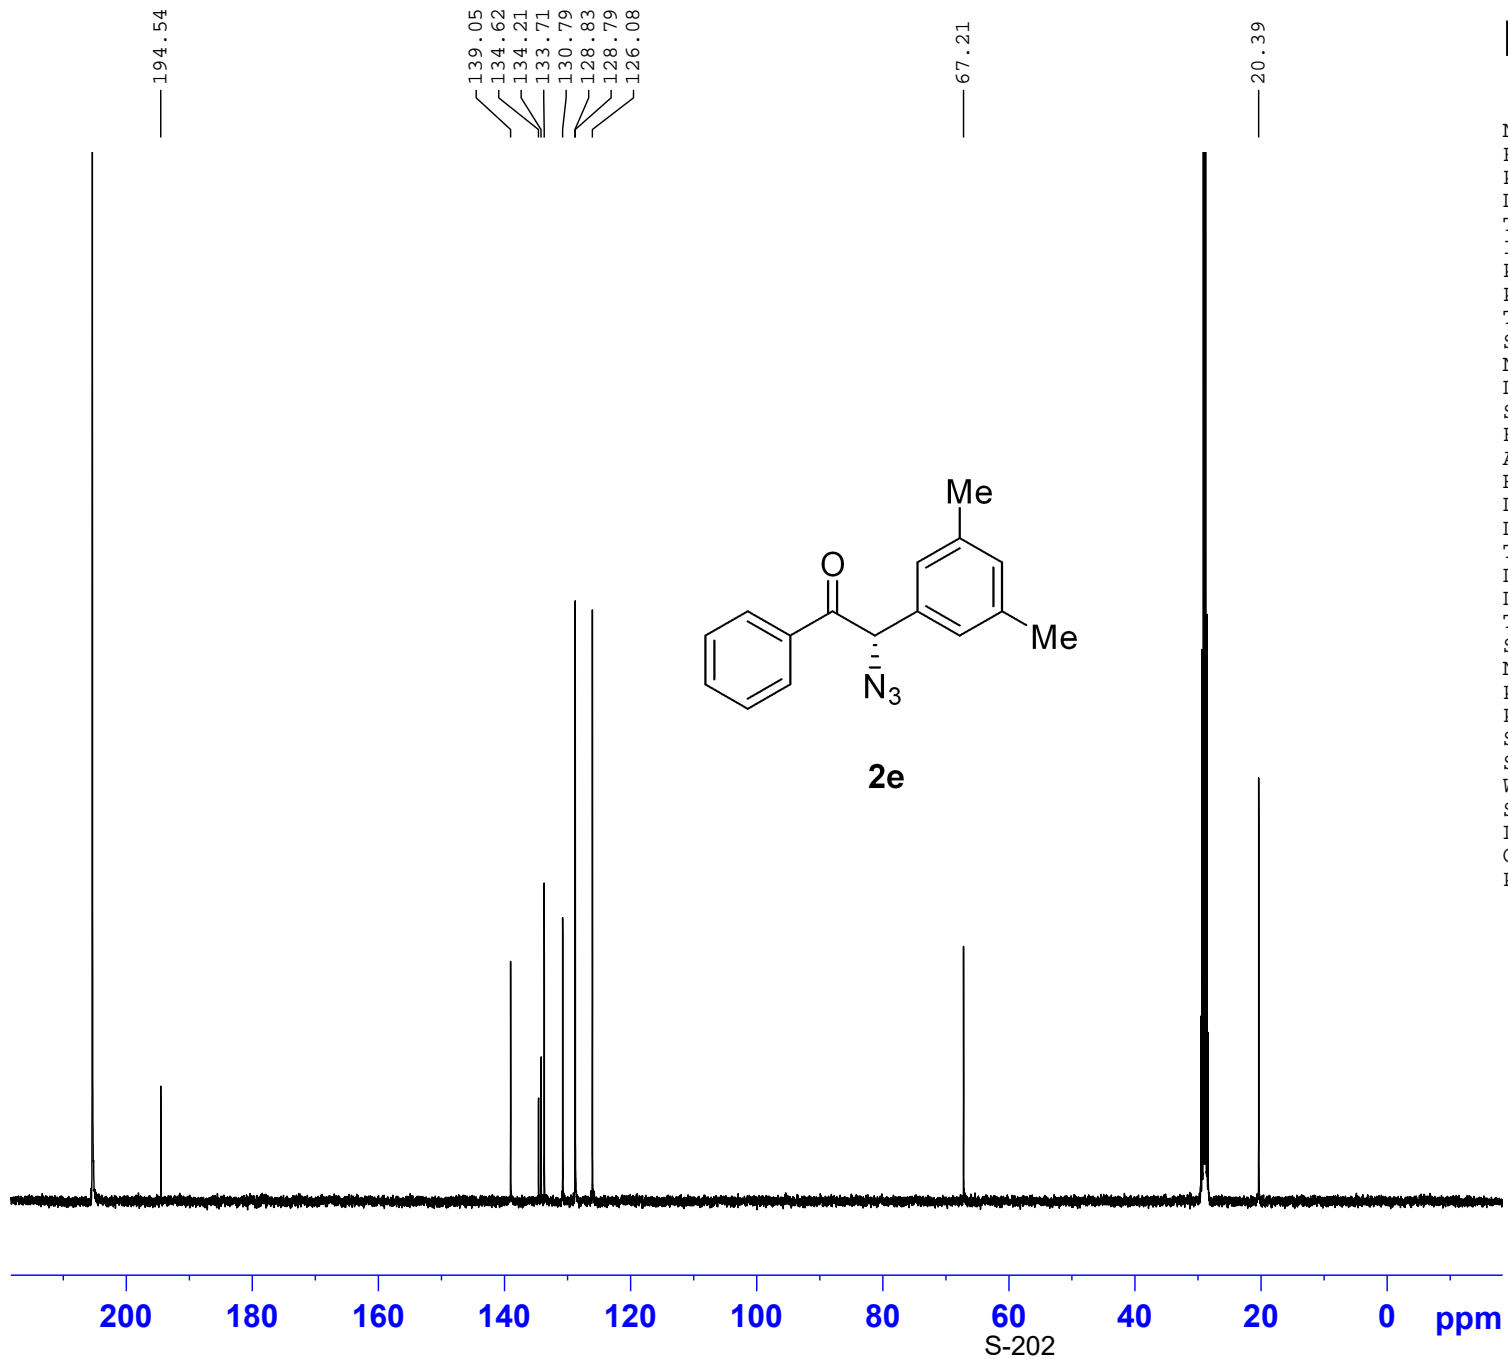

7.86  
7.47  
7.45  
7.44  
7.44  
7.43  
7.42  
7.41  
7.41  
7.40  
7.40  
7.39  
7.38  
7.38  
7.35  
7.33  
7.31  
7.09  
7.09  
7.07  
7.05  
7.05  
7.04  
6.13



NAME HNMR-gwg-2-68  
EXPNO 1  
PROCNO 1  
Date\_ 20210610  
Time 20.52 h  
INSTRUM Avance  
PROBHD z116098\_0833 (  
PULPROG zg30  
TD 65536  
SOLVENT Acetone  
NS 16  
DS 2  
SWH 8196.722 Hz  
FIDRES 0.250144 Hz  
AQ 3.9977460 sec  
RG 81.1688  
DW 61.000 usec  
DE 13.54 usec  
TE 294.5 K  
D1 1.00000000 sec  
TD0 1  
SFO1 400.1324708 MHz  
NUC1 1H  
P0 3.33 usec  
P1 10.00 usec  
SI 65536  
SF 400.1300649 MHz  
WDW EM  
SSB 0  
LB 0.30 Hz  
GB 0  
PC 1.00

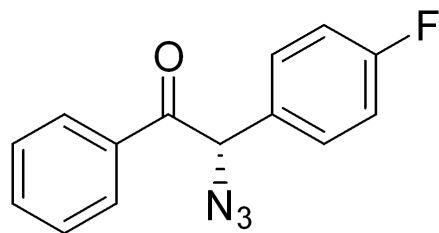

2f

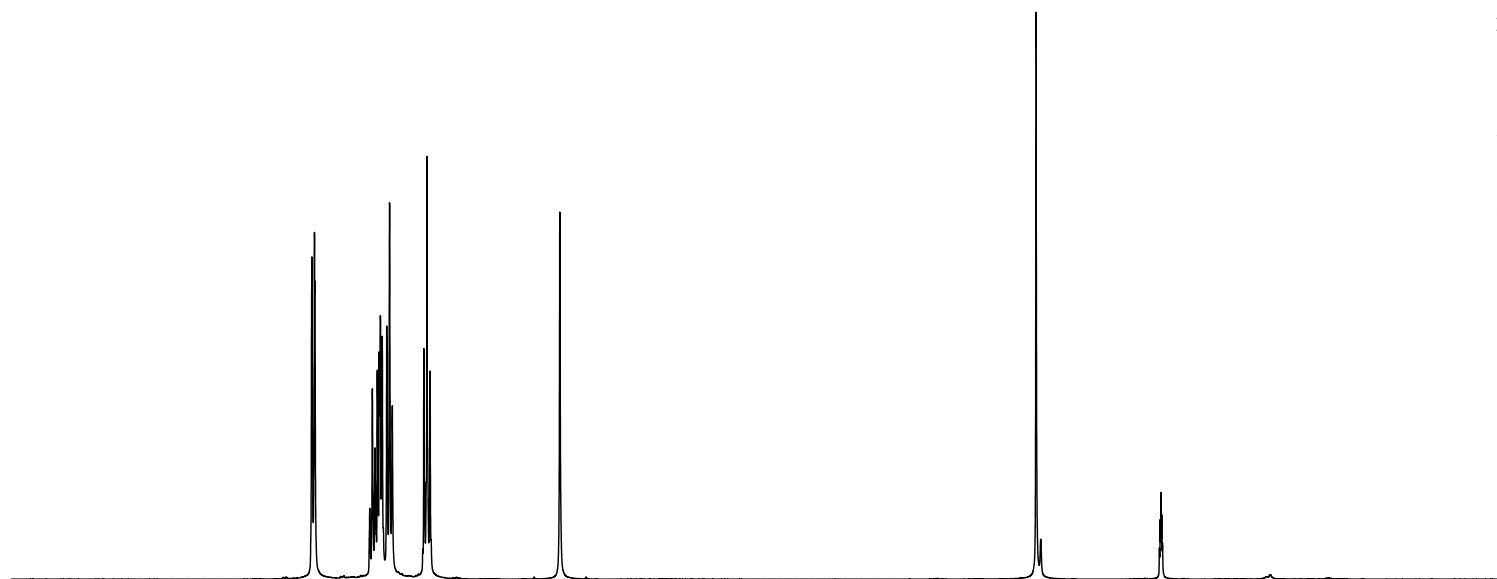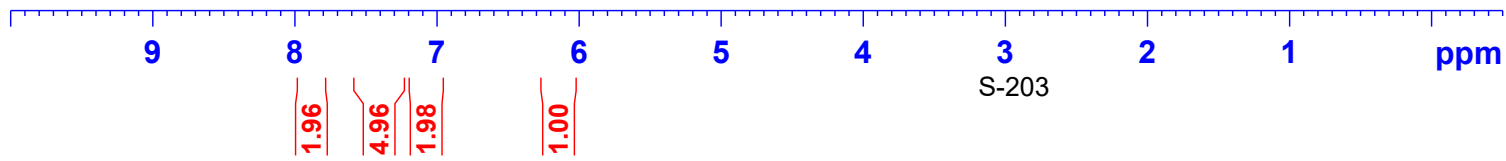

S-203

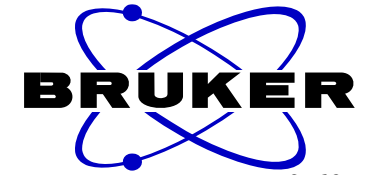

NAME CNMR-gwg-2-68  
EXPNO 2  
PROCNO 1  
Date\_ 20210610  
Time 21.05 h  
INSTRUM Avance  
PROBHD z116098\_0833 (  
PULPROG zgpg30  
TD 65536  
SOLVENT Acetone  
NS 200  
DS 4  
SWH 23809.523 Hz  
FIDRES 0.726609 Hz  
AQ 1.3763061 sec  
RG 48.6724  
DW 21.000 usec  
DE 6.50 usec  
TE 294.9 K  
D1 2.00000000 sec  
D11 0.03000000 sec  
TD0 1  
SFO1 100.6228298 MHz  
NUC1 13C  
P0 3.33 usec  
P1 10.00 usec  
SI 32768  
SF 100.6127685 MHz  
WDW EM  
SSB 0  
LB 1.00 Hz  
GB 0  
PC 1.40

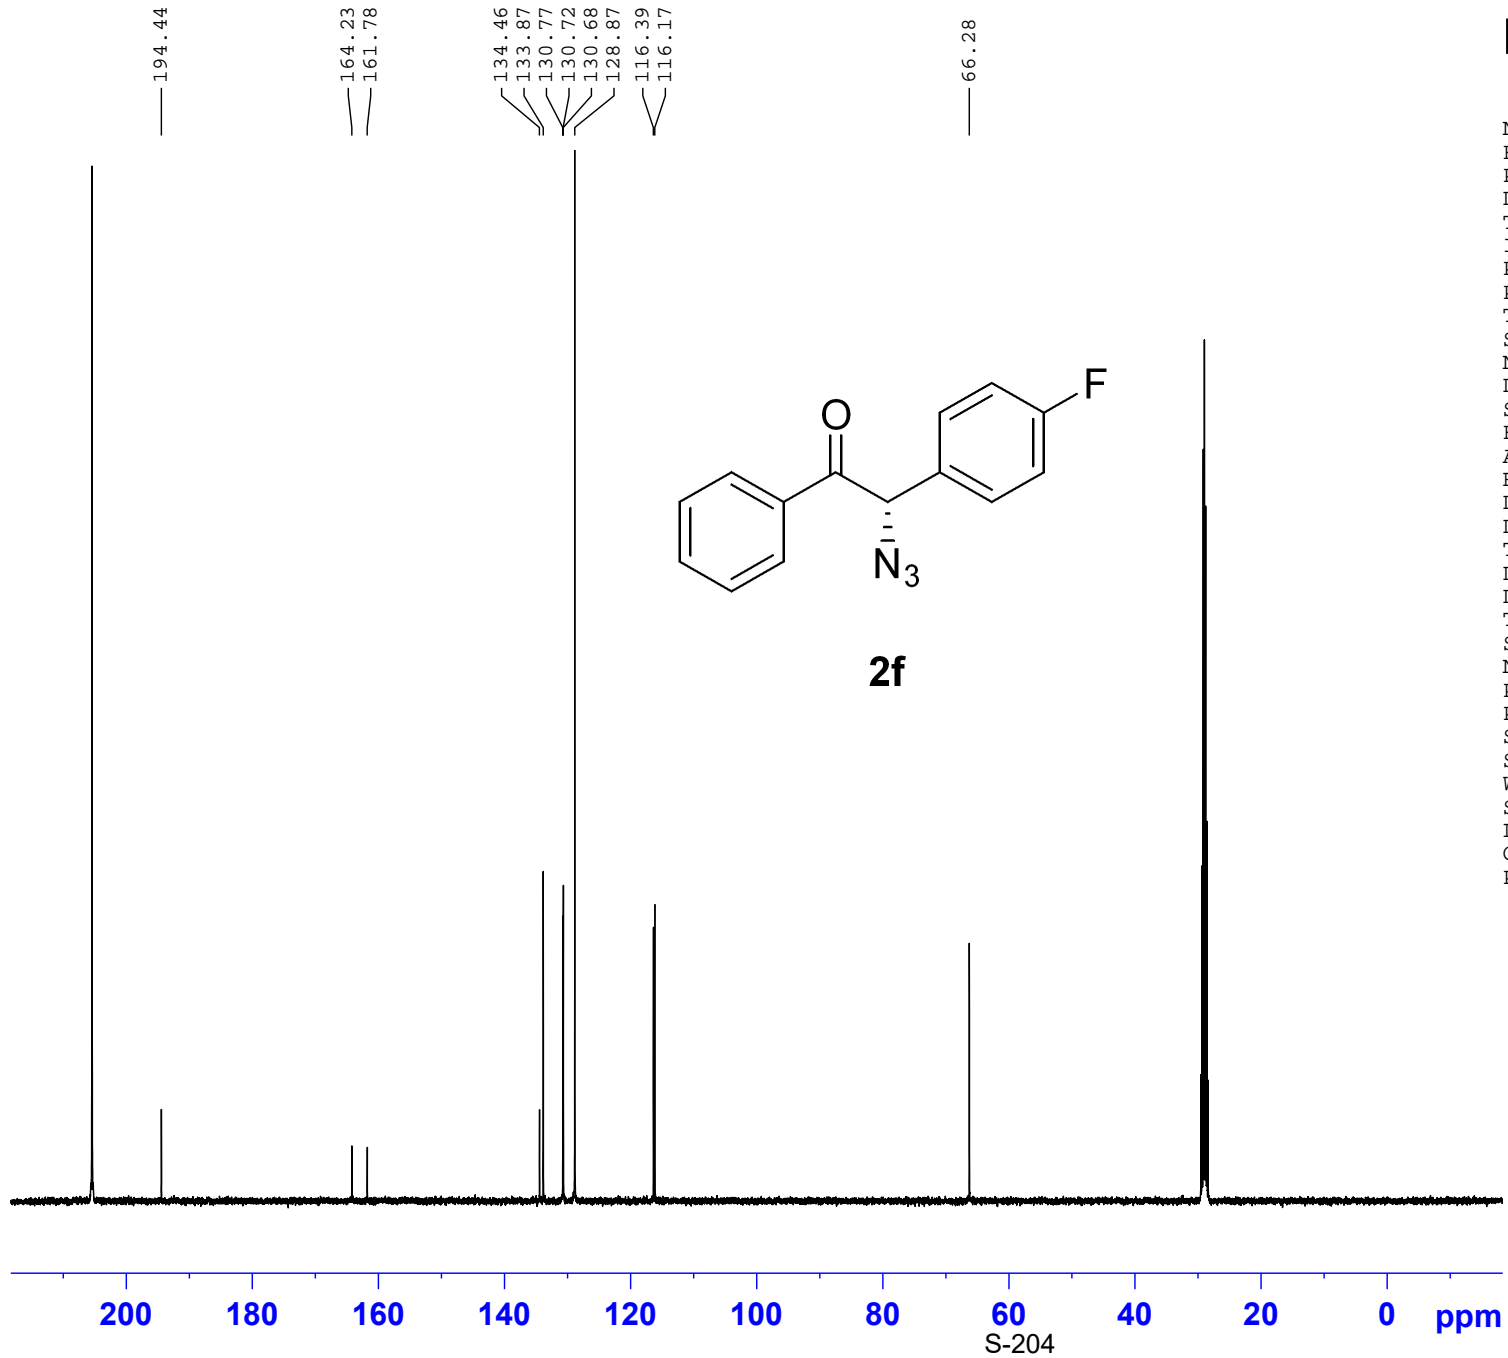



NAME FNMN-gwg-2-68  
EXPNO 3  
PROCNO 1  
Date\_ 20210610  
Time 21.07 h  
INSTRUM Avance  
PROBHD Z116098\_0833 (  
PULPROG zgig  
TD 131072  
SOLVENT Acetone  
NS 16  
DS 4  
SWH 90909.094 Hz  
FIDRES 1.387163 Hz  
AQ 0.7209460 sec  
RG 101  
DW 5.500 usec  
DE 6.50 usec  
TE 294.7 K  
D1 1.00000000 sec  
D11 0.03000000 sec  
TD0 1  
SFO1 376.4607164 MHz  
NUC1 19F  
P1 18.00 usec  
SI 65536  
SF 376.4983662 MHz  
WDW EM  
SSB 0  
LB 0.30 Hz  
GB 0  
PC 1.00

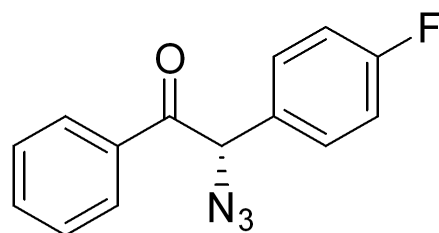

2f

-113.51

20 0 -20 -40 -60 -80 -100 -120 -140 -160 -180 -200 ppm

S-205

8.06  
8.04  
7.67  
7.66  
7.65  
7.63  
7.63  
7.56  
7.54  
7.53  
7.51  
6.33

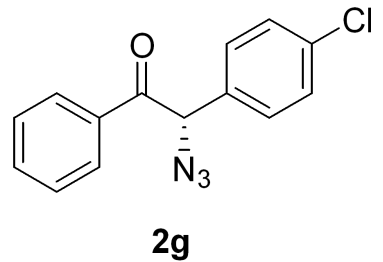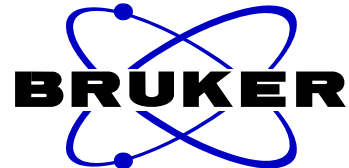

```

NAME      HNMR-gwg-2-47
EXPNO     1
PROCNO    1
Date_     20210602
Time      20.29 h
INSTRUM   Avance
PROBHD    Z116098_0833 (
PULPROG   zg30
TD        65536
SOLVENT   Acetone
NS        16
DS        2
SWH       8196.722 Hz
FIDRES    0.250144 Hz
AQ        3.9977460 sec
RG        101
DW        61.000 usec
DE        13.54 usec
TE        294.3 K
D1        1.00000000 sec
TD0       1
SFO1      400.1324708 MHz
NUC1      1H
P0        3.33 usec
P1        10.00 usec
SI        65536
SF        400.1299908 MHz
WDW       EM
SSB       0
LB        0.30 Hz
GB        0
PC        1.00
  
```

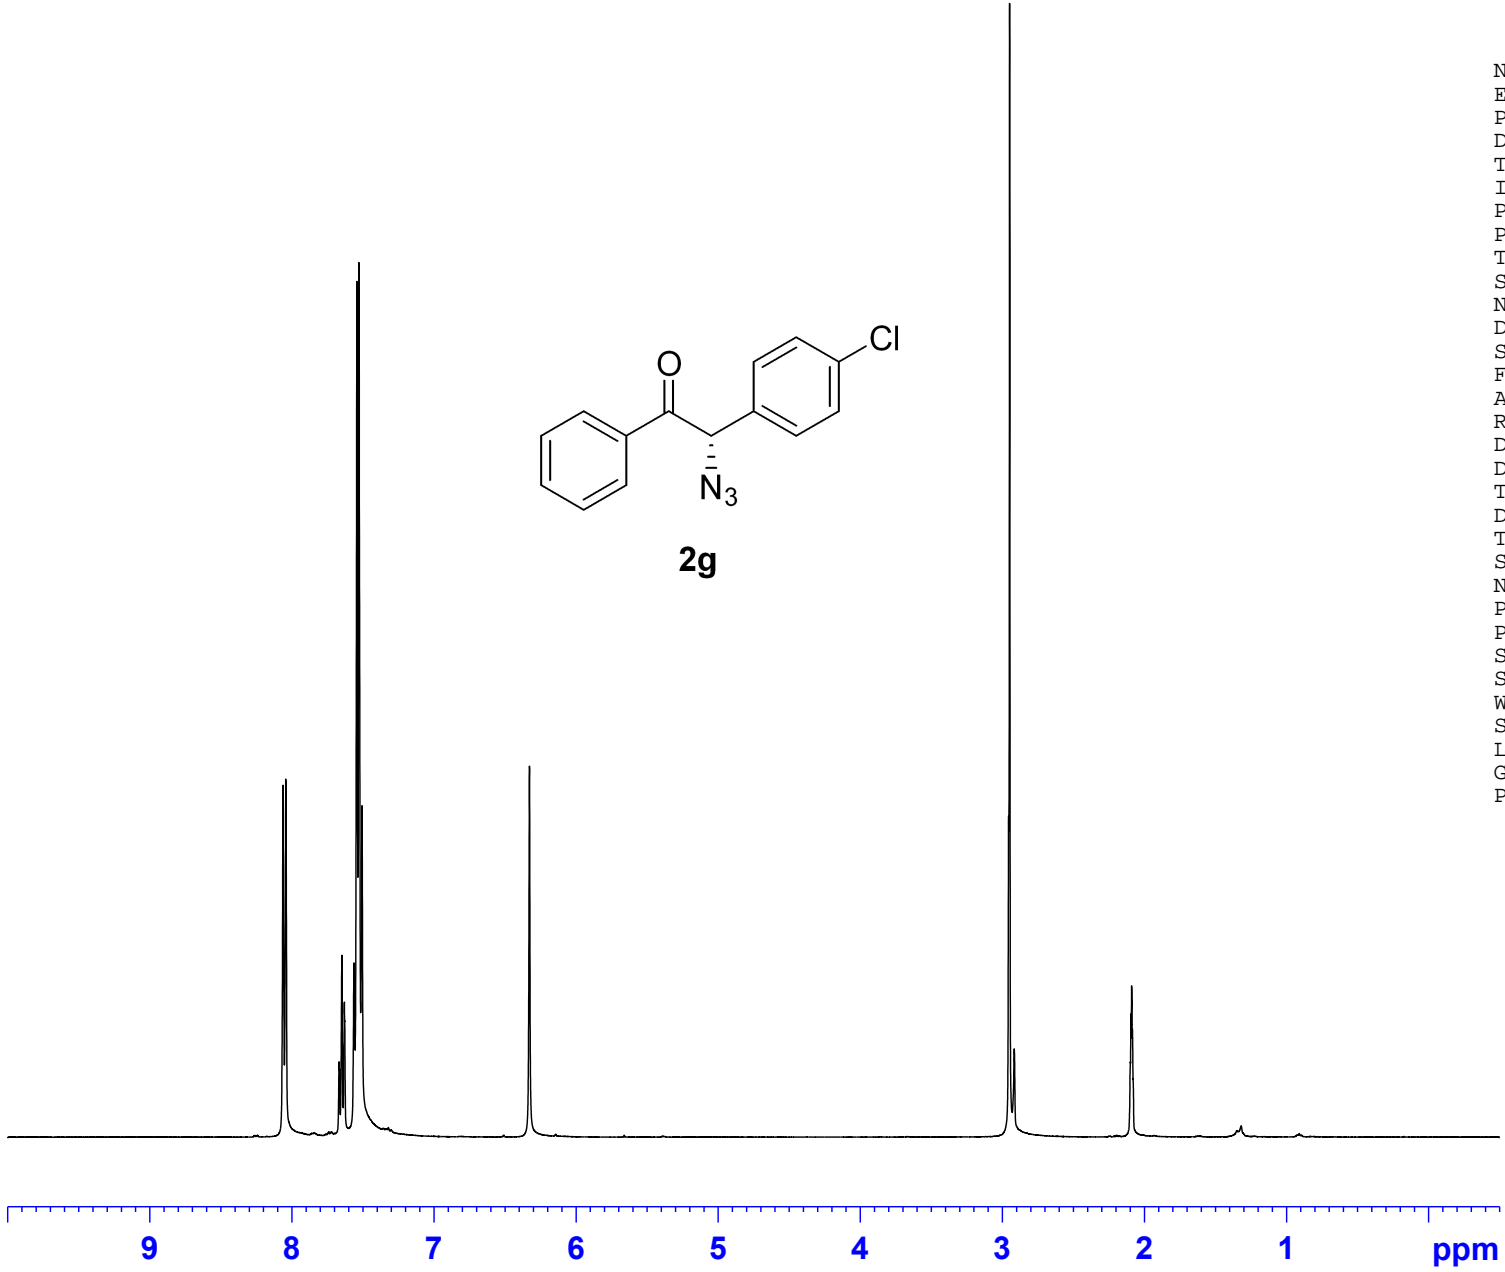

1.99  
0.97  
6.10  
1.00

S-206



NAME CNMR-gwg-2-47  
EXPNO 2  
PROCNO 1  
Date\_ 20210602  
Time 20.37 h  
INSTRUM Avance  
PROBHD z116098\_0833 (  
PULPROG zgpg30  
TD 65536  
SOLVENT Acetone  
NS 100  
DS 4  
SWH 23809.523 Hz  
FIDRES 0.726609 Hz  
AQ 1.3763061 sec  
RG 47.4244  
DW 21.000 usec  
DE 6.50 usec  
TE 294.7 K  
D1 2.00000000 sec  
D11 0.03000000 sec  
TD0 1  
SFO1 100.6228298 MHz  
NUC1 13C  
P0 3.33 usec  
P1 10.00 usec  
SI 32768  
SF 100.6127685 MHz  
WDW EM  
SSB 0  
LB 1.00 Hz  
GB 0  
PC 1.40

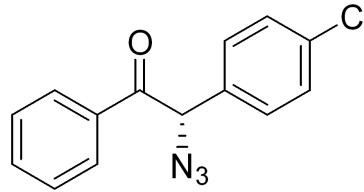

2g

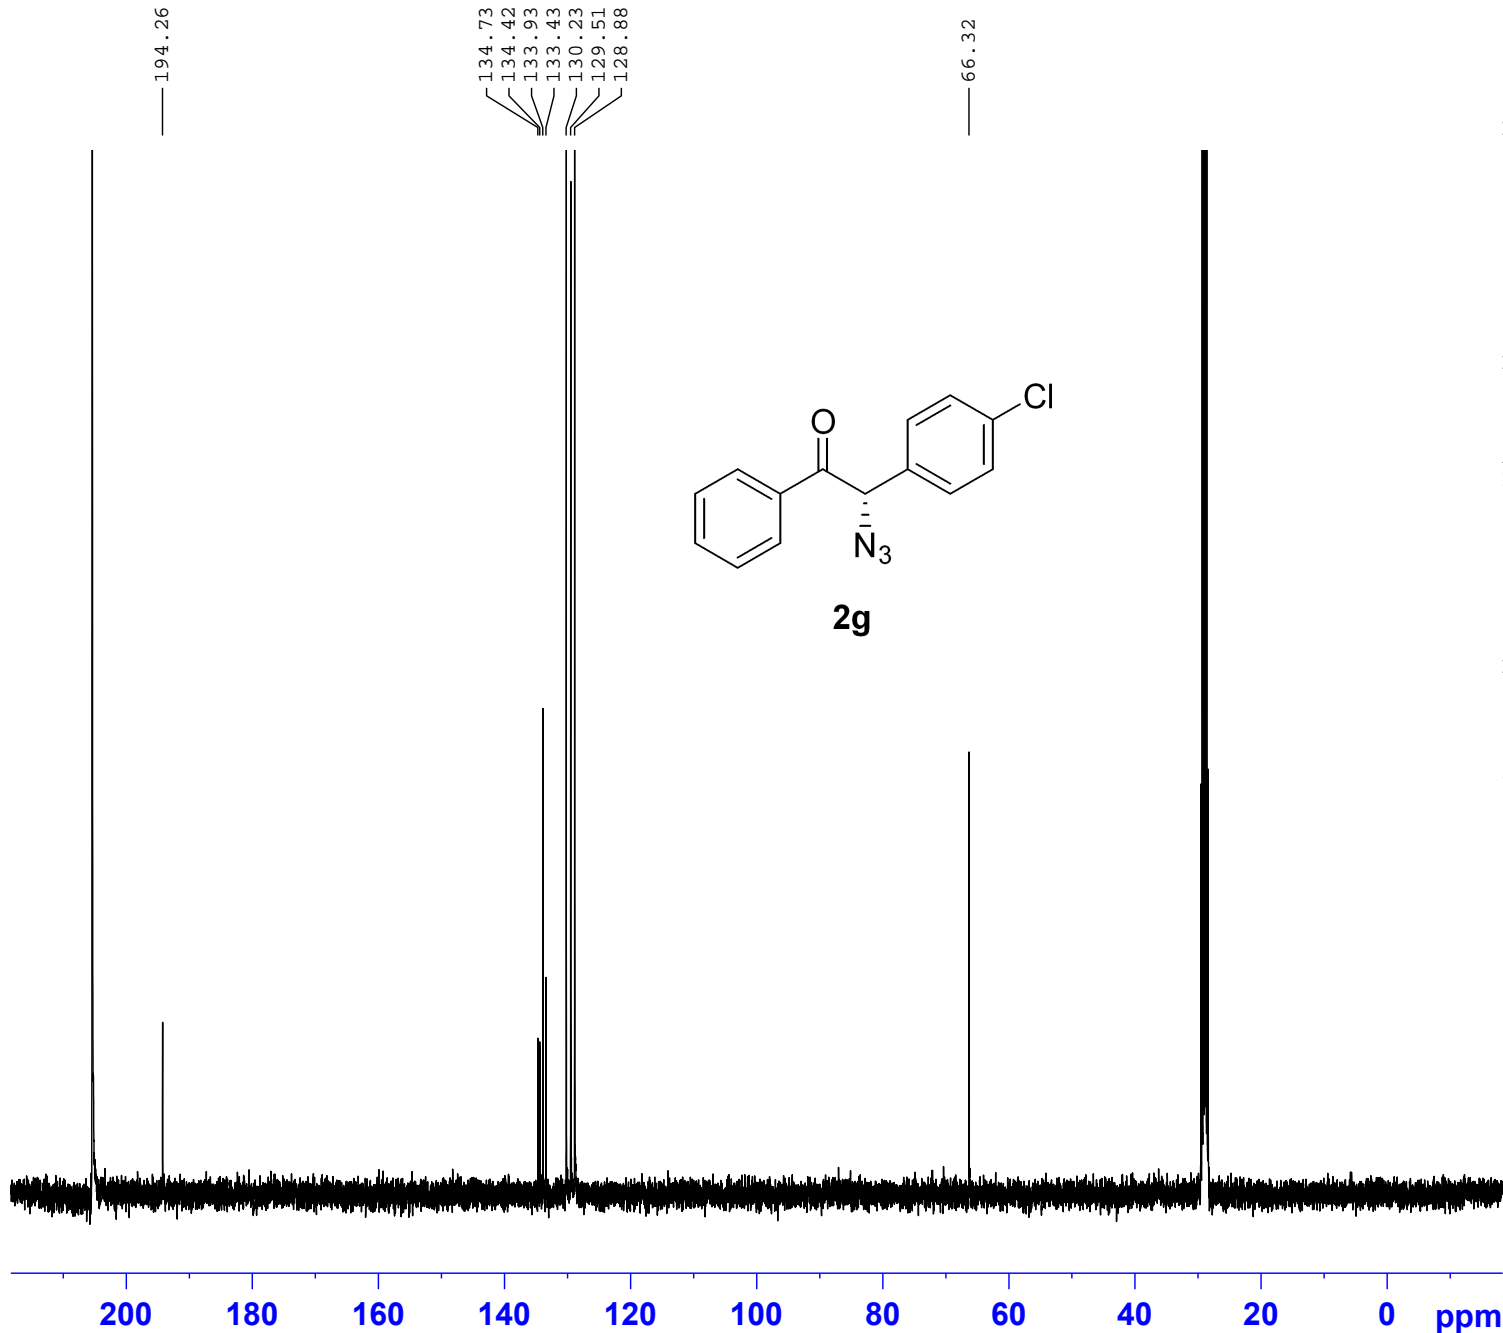

8.05  
8.03  
8.03  
7.67  
7.66  
7.65  
7.65  
7.64  
7.64  
7.62  
7.53  
7.51  
7.49  
7.48  
7.46  
6.30

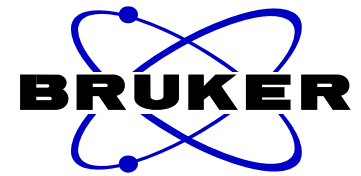

NAME HNMR-gwg-2-46  
EXPNO 180  
PROCNO 1  
Date\_ 20210602  
Time 14.31  
INSTRUM spect  
PROBHD 5 mm PABBO BB-  
PULPROG zg30  
TD 65536  
SOLVENT Acetone  
NS 6  
DS 2  
SWH 8223.685 Hz  
FIDRES 0.125483 Hz  
AQ 3.9846387 sec  
RG 100.49  
DW 60.800 usec  
DE 6.50 usec  
TE 294.7 K  
D1 1.00000000 sec  
TD0 1

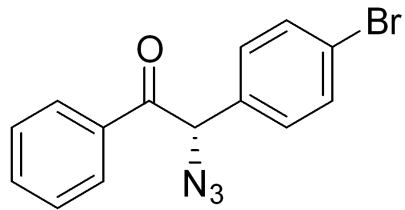

2h

==== CHANNEL f1 =====  
NUC1 1H  
P1 14.40 usec  
SI 65536  
SF 400.1900000 MHz  
WDW EM  
SSB 0  
LB 0.30 Hz  
GB 0  
PC 1.00

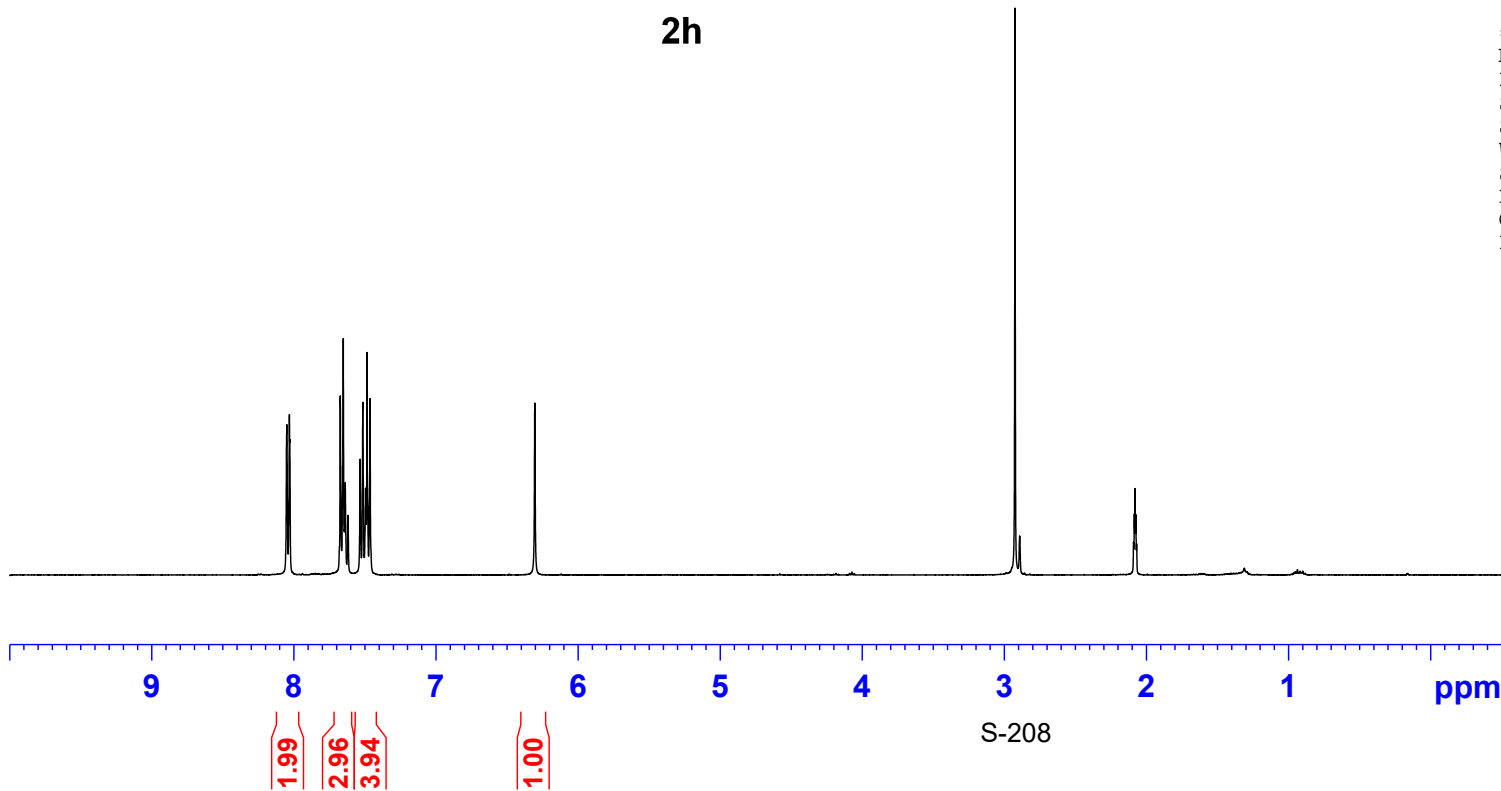





NAME CNMR-gwg-2-46  
EXPNO 181  
PROCNO 1  
Date\_ 20210602  
Time 14.41  
INSTRUM spect  
PROBHD 5 mm PABBO BB-  
PULPROG zgpg30  
TD 65536  
SOLVENT Acetone  
NS 167  
DS 4  
SWH 24038.461 Hz  
FIDRES 0.366798 Hz  
AQ 1.3631988 sec  
RG 193.13  
DW 20.800 usec  
DE 6.50 usec  
TE 295.2 K  
D1 2.00000000 sec  
D11 0.03000000 sec  
TD0 1

==== CHANNEL f1 =====  
NUC1 13C  
P1 9.90 usec  
SI 32768  
SF 100.6278560 MHz  
WDW EM  
SSB 0  
LB 1.00 Hz  
GB 0  
PC 1.40

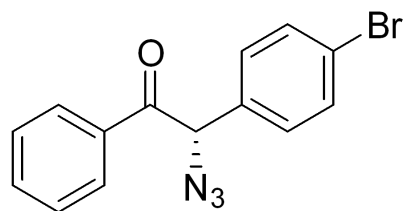

2h

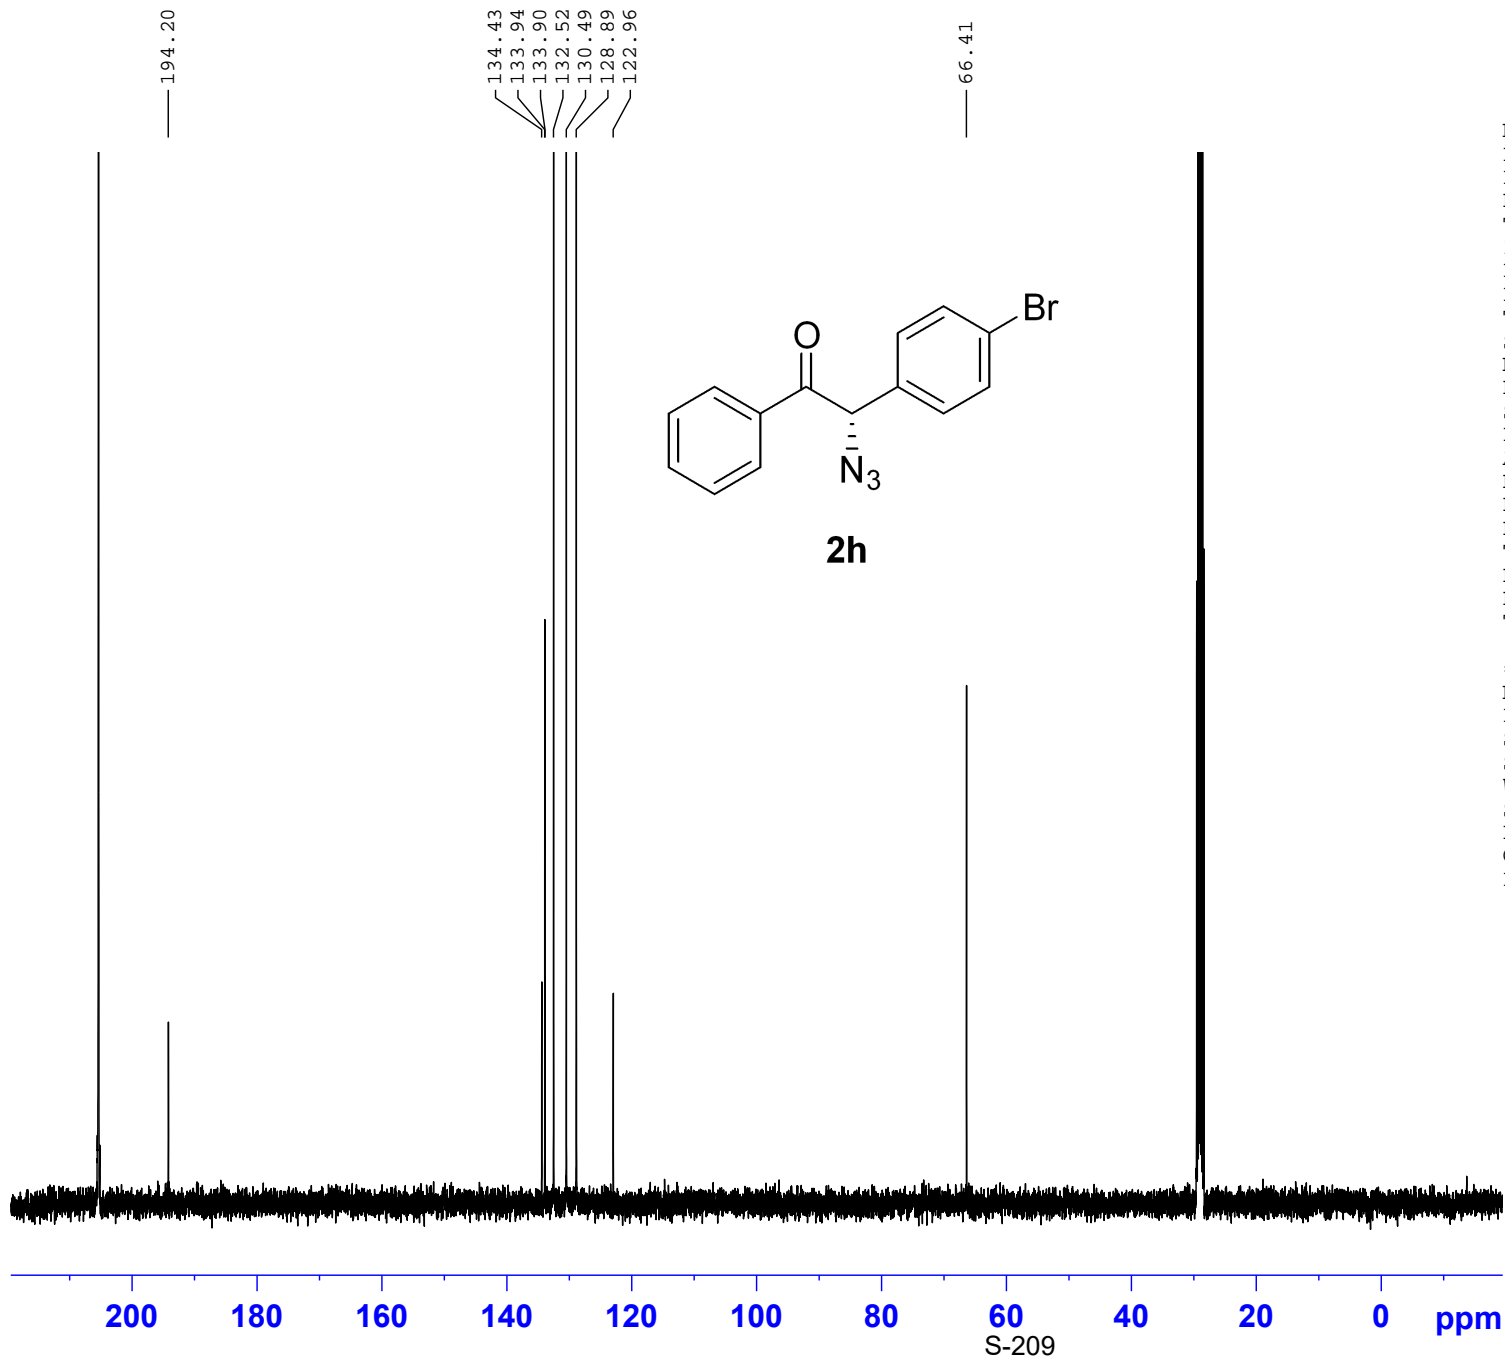

7.49  
7.49  
7.48  
7.47  
7.47  
7.47  
7.46  
7.46  
7.46  
7.44  
7.44  
7.44  
7.44  
7.39  
7.38  
7.37  
7.35  
7.35  
7.35  
7.34  
7.34  
7.33  
7.32  
7.32  
7.29  
7.27  
7.25  
6.17



NAME HNMR-gwg-3-6  
 EXPNO 3  
 PROCNO 1  
 Date\_ 20210622  
 Time 23.00 h  
 INSTRUM Avance  
 PROBHD z116098\_0833 (  
 PULPROG zg30  
 TD 65536  
 SOLVENT Acetone  
 NS 16  
 DS 2  
 SWH 8196.722 Hz  
 FIDRES 0.250144 Hz  
 AQ 3.9977460 sec  
 RG 101  
 DW 61.000 usec  
 DE 13.54 usec  
 TE 294.3 K  
 D1 1.00000000 sec  
 TD0 1  
 SFO1 400.1324708 MHz  
 NUC1 1H  
 P0 3.33 usec  
 P1 10.00 usec  
 SI 65536  
 SF 400.1300603 MHz  
 WDW EM  
 SSB 0  
 LB 0.30 Hz  
 GB 0  
 PC 1.00

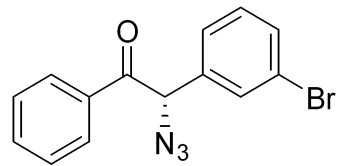

2i

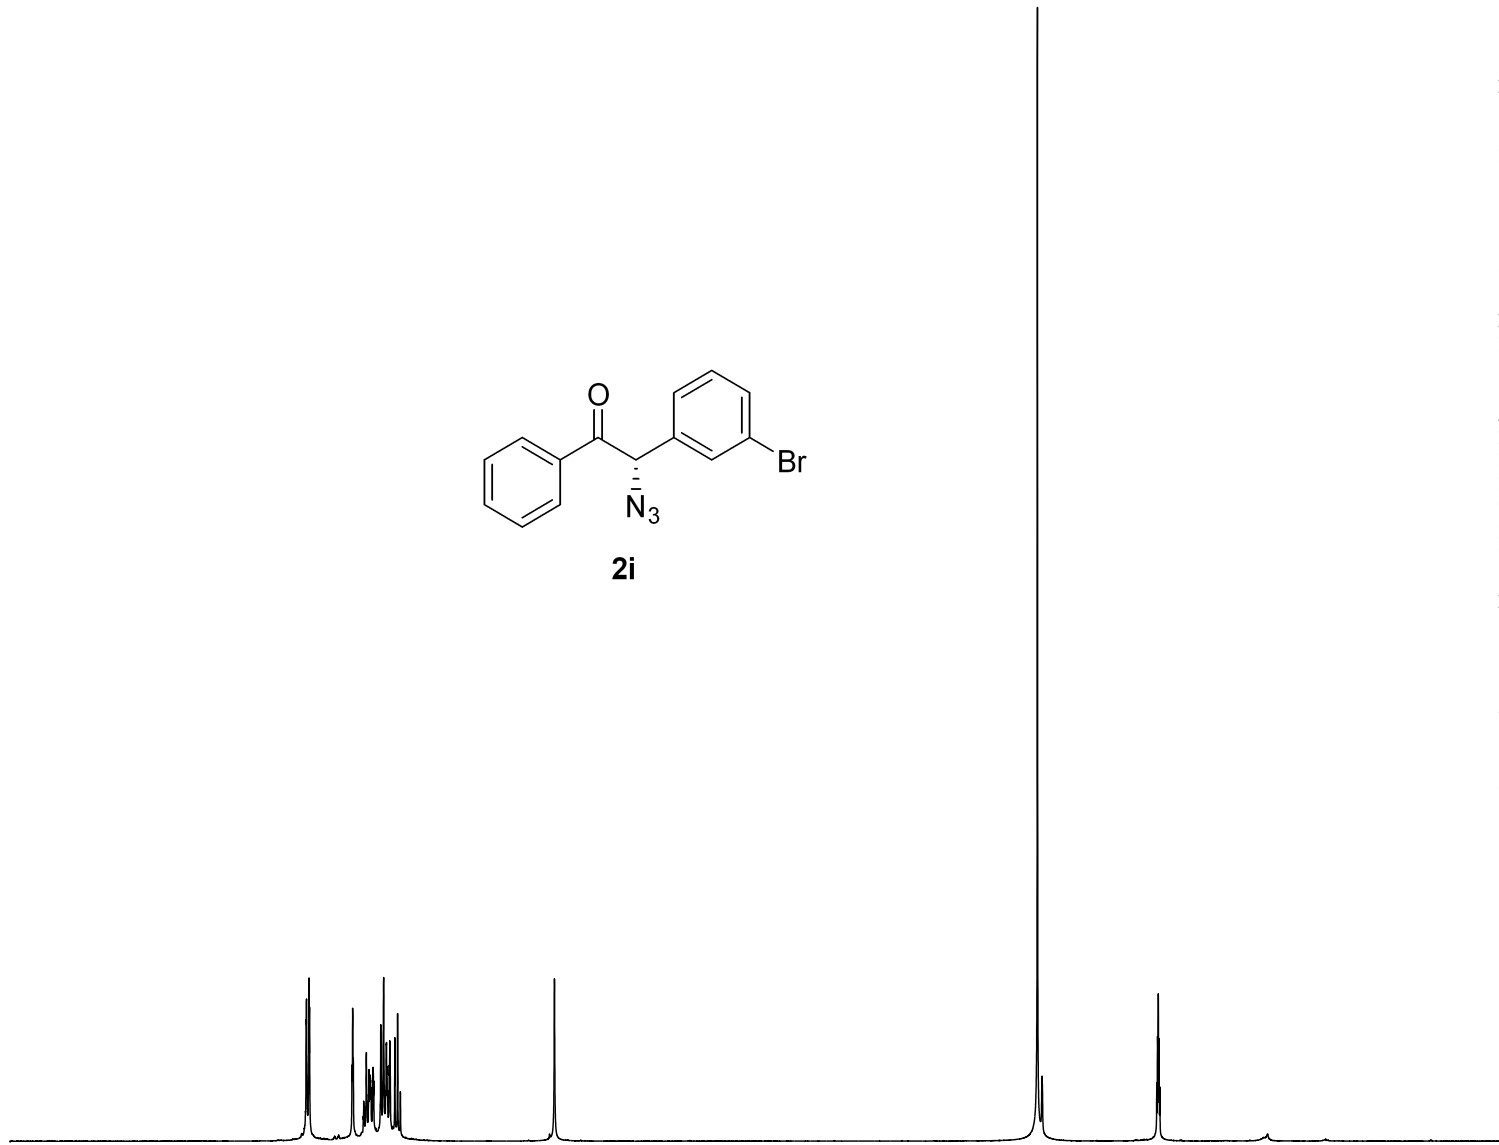

9 8 7 6 5 4 3 2 1 ppm

2.05  
1.04  
2.17  
4.32  
1.00

S-210

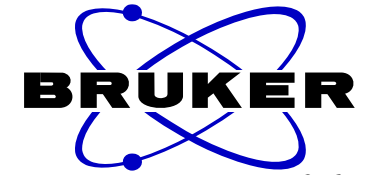

NAME CNMR-gwg-3-6  
EXPNO 4  
PROCNO 1  
Date\_ 20210623  
Time 0.00 h  
INSTRUM Avance  
PROBHD z116098\_0833 (  
PULPROG zgpg30  
TD 65536  
SOLVENT Acetone  
NS 1024  
DS 4  
SWH 23809.523 Hz  
FIDRES 0.726609 Hz  
AQ 1.3763061 sec  
RG 48.6724  
DW 21.000 usec  
DE 6.50 usec  
TE 295.0 K  
D1 2.00000000 sec  
D11 0.03000000 sec  
TD0 1  
SFO1 100.6228298 MHz  
NUC1 13C  
P0 3.33 usec  
P1 10.00 usec  
SI 32768  
SF 100.6127685 MHz  
WDW EM  
SSB 0  
LB 1.00 Hz  
GB 0  
PC 1.40

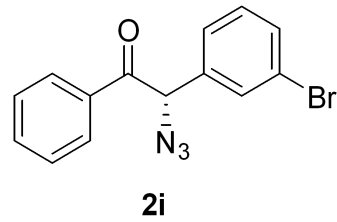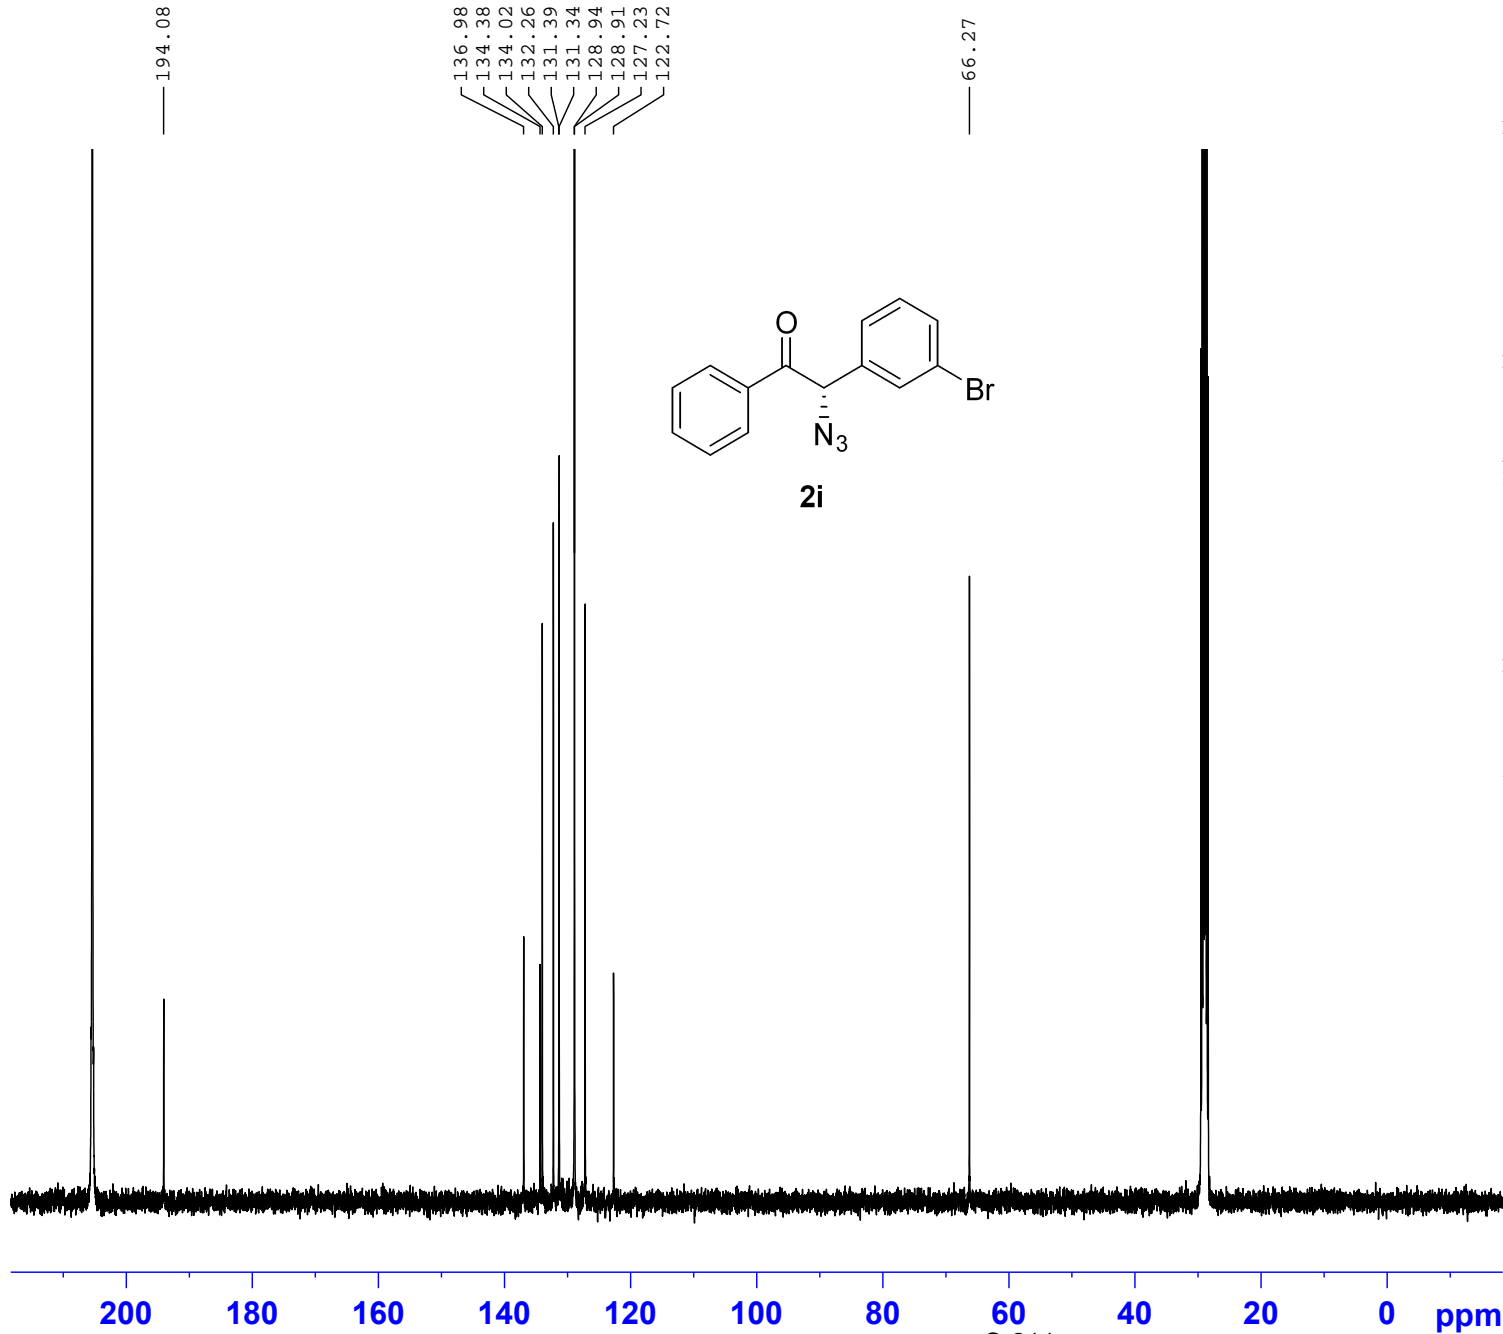

7.78  
7.76  
7.41  
7.40  
7.39  
7.38  
7.15  
7.13  
7.09  
7.07  
7.05  
6.08

— 2.20

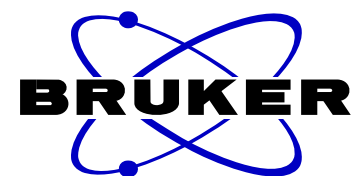

```

NAME      HNMR-gwg-2-69
EXPNO     4
PROCNO    1
Date_     20210610
Time      21.11 h
INSTRUM   Avance
PROBHD    Z116098_0833 (
PULPROG   zg30
TD        65536
SOLVENT   Acetone
NS        16
DS        2
SWH       8196.722 Hz
FIDRES    0.250144 Hz
AQ        3.9977460 sec
RG        83.1117
DW        61.000 usec
DE        13.54 usec
TE        294.5 K
D1        1.00000000 sec
TD0       1
SFO1      400.1324708 MHz
NUC1      1H
P0        3.33 usec
P1        10.00 usec
SI        65536
SF        400.1300626 MHz
WDW       EM
SSB       0
LB        0.30 Hz
GB        0
PC        1.00
  
```

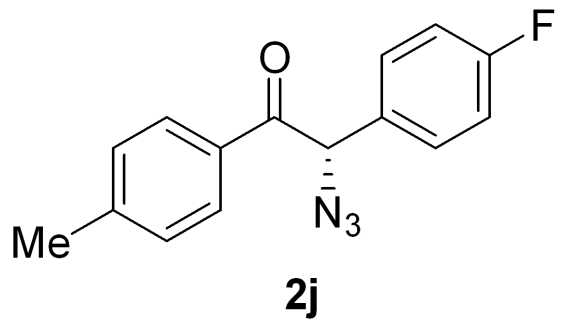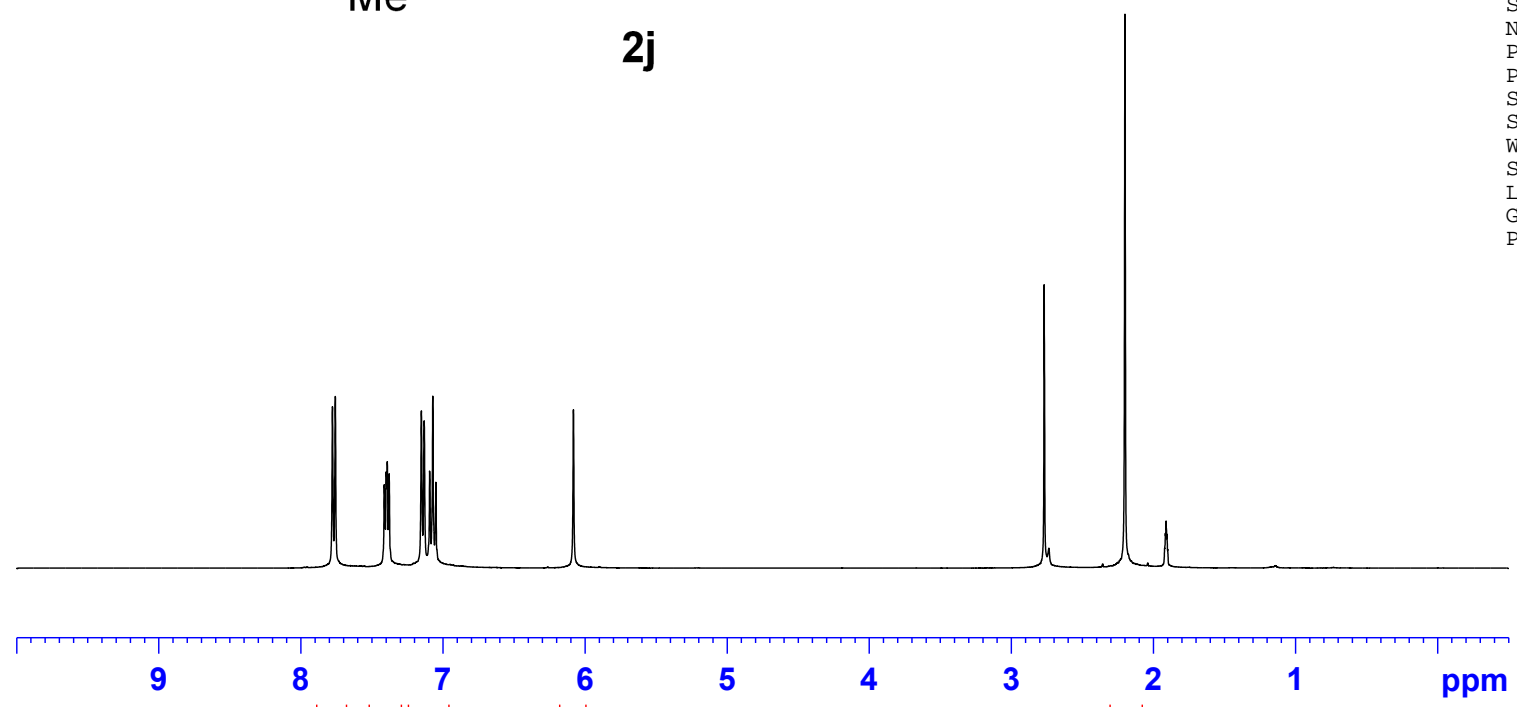

1.98  
2.05  
4.09  
1.00

S-212

3.09

ppm

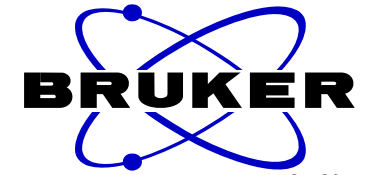

NAME CNMR-gwg-2-69  
EXPNO 5  
PROCNO 1  
Date\_ 20210610  
Time 21.24 h  
INSTRUM Avance  
PROBHD z116098\_0833 (  
PULPROG zgpg30  
TD 65536  
SOLVENT Acetone  
NS 200  
DS 4  
SWH 23809.523 Hz  
FIDRES 0.726609 Hz  
AQ 1.3763061 sec  
RG 51.55  
DW 21.000 usec  
DE 6.50 usec  
TE 295.0 K  
D1 2.00000000 sec  
D11 0.03000000 sec  
TD0 1  
SFO1 100.6228298 MHz  
NUC1 13C  
P0 3.33 usec  
P1 10.00 usec  
SI 32768  
SF 100.6127685 MHz  
WDW EM  
SSB 0  
LB 1.00 Hz  
GB 0  
PC 1.40

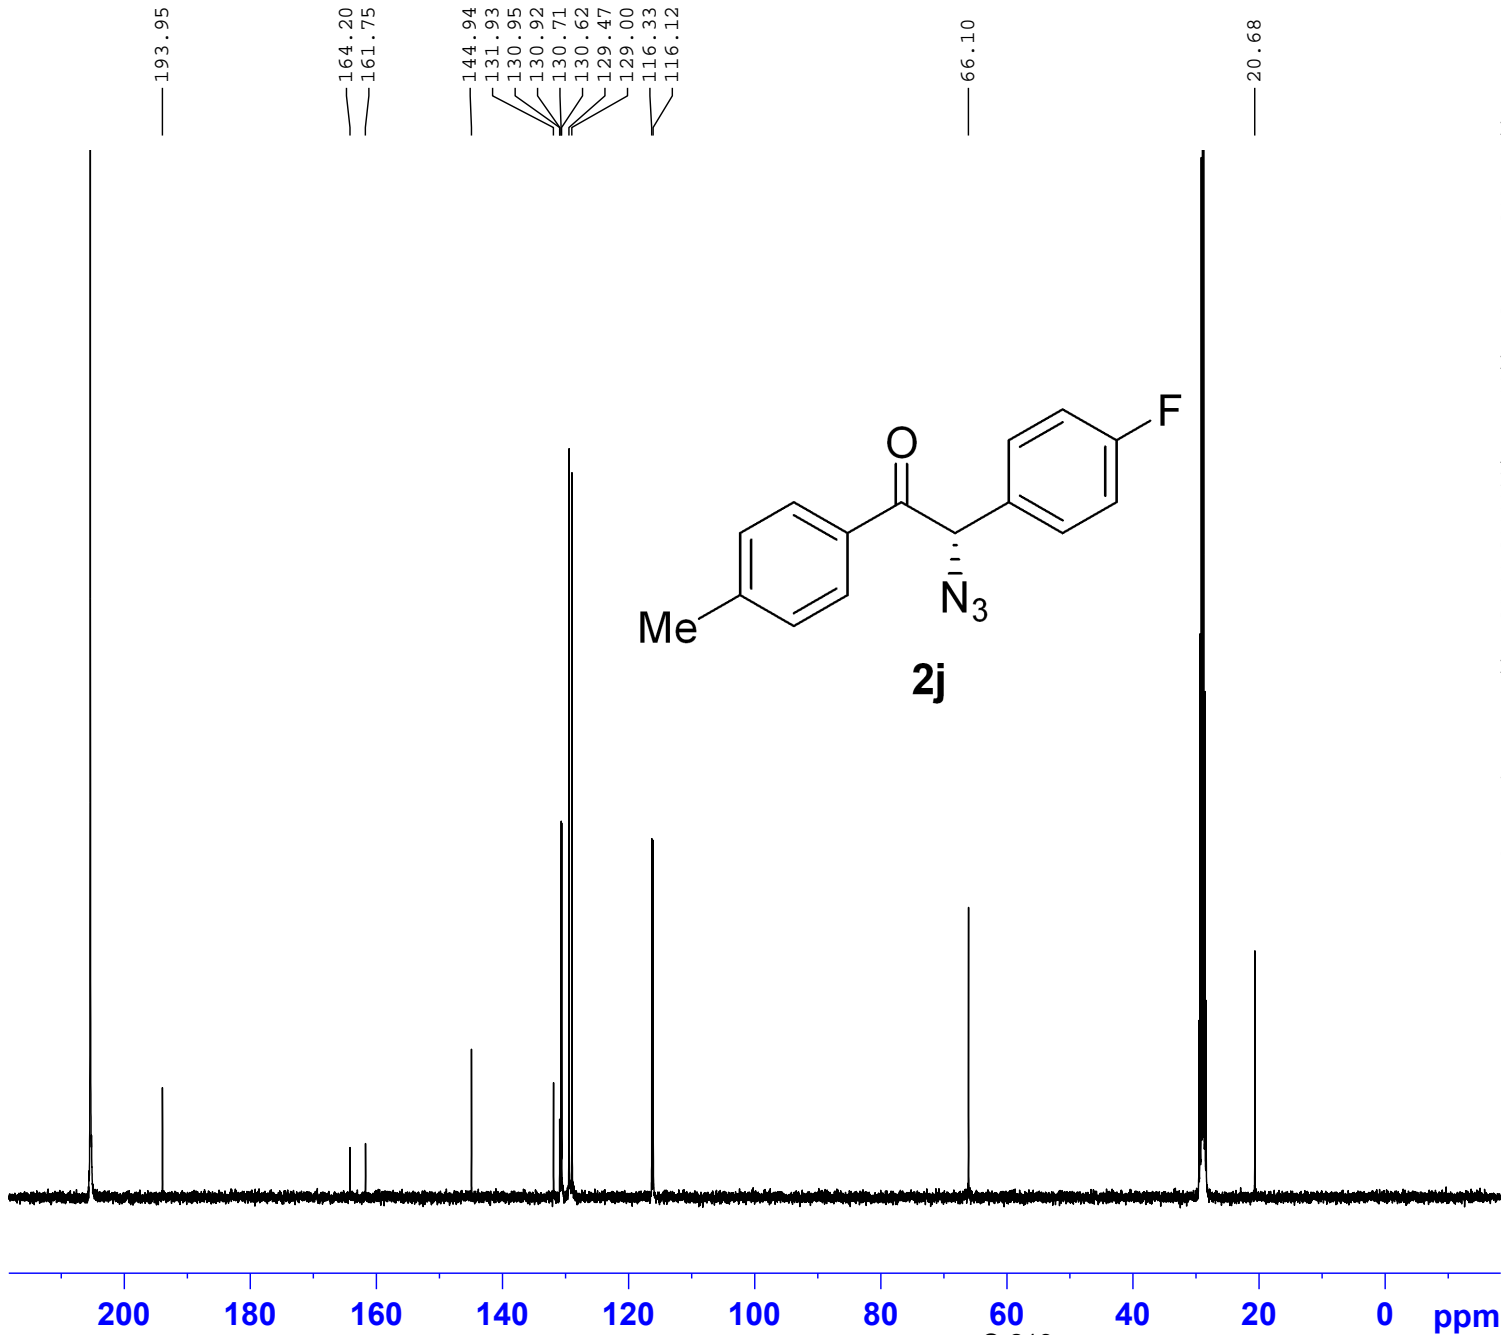



NAME FNMN-gwg-2-69  
EXPNO 6  
PROCNO 1  
Date\_ 20210610  
Time 21.26 h  
INSTRUM Avance  
PROBHD Z116098\_0833 (  
PULPROG zgig  
TD 131072  
SOLVENT Acetone  
NS 16  
DS 4  
SWH 90909.094 Hz  
FIDRES 1.387163 Hz  
AQ 0.7209460 sec  
RG 101  
DW 5.500 usec  
DE 6.50 usec  
TE 294.7 K  
D1 1.00000000 sec  
D11 0.03000000 sec  
TD0 1  
SFO1 376.4607164 MHz  
NUC1 19F  
P1 18.00 usec  
SI 65536  
SF 376.4983662 MHz  
WDW EM  
SSB 0  
LB 0.30 Hz  
GB 0  
PC 1.00

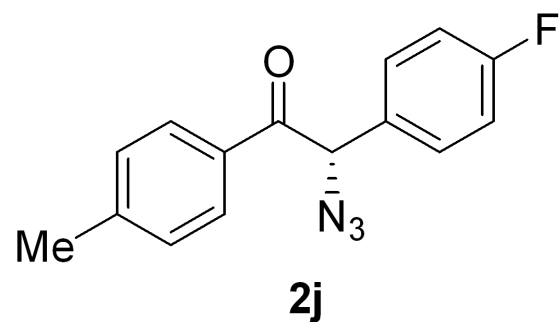

— -113.65

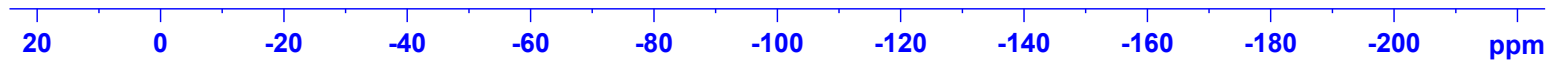

7.85  
7.84  
7.84  
7.83  
7.41  
7.41  
7.40  
7.39  
7.38  
7.38  
7.08  
7.08  
7.07  
7.06  
7.06  
7.05  
7.04  
6.85  
6.84  
6.84  
6.82  
6.82  
6.81  
6.02

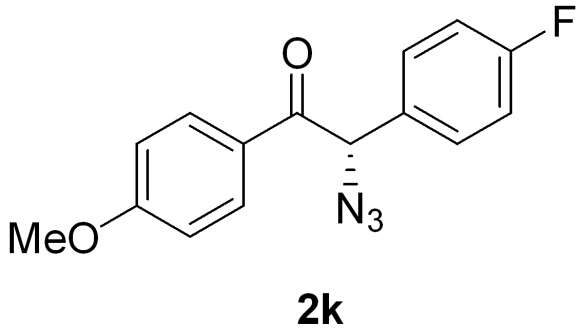

3.69

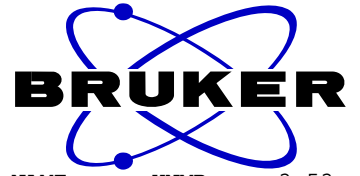

NAME HNMR-gwg-3-53  
EXPNO 1  
PROCNO 1  
Date\_ 20210710  
Time 6.12 h  
INSTRUM Avance  
PROBHD z116098\_0833 (  
PULPROG zg30  
TD 65536  
SOLVENT Acetone  
NS 16  
DS 2  
SWH 8196.722 Hz  
FIDRES 0.250144 Hz  
AQ 3.9977460 sec  
RG 47.619  
DW 61.000 usec  
DE 13.54 usec  
TE 294.6 K  
D1 1.00000000 sec  
TD0 1  
SFO1 400.1324708 MHz  
NUC1 1H  
P0 3.33 usec  
P1 10.00 usec  
SI 65536  
SF 400.1300665 MHz  
WDW EM  
SSB 0  
LB 0.30 Hz  
GB 0  
PC 1.00

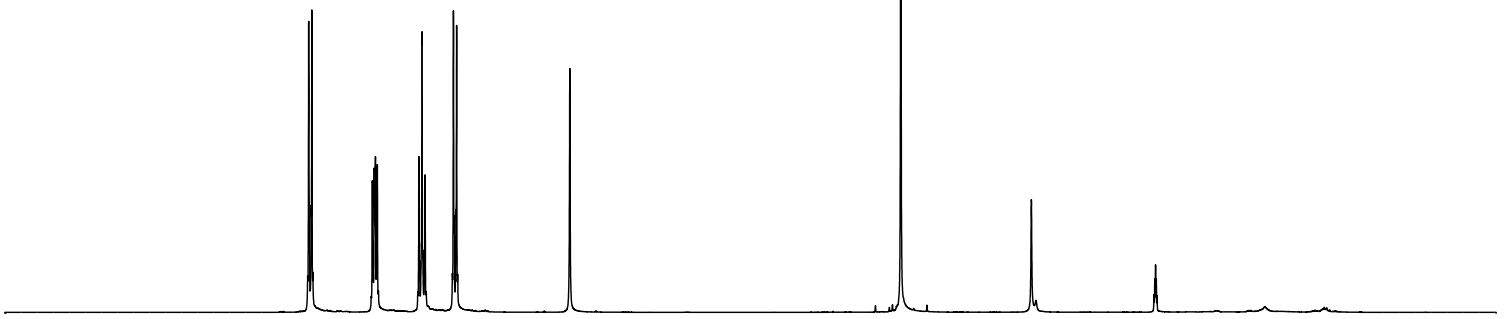

9 8 7 6 5 4 3 2 1 ppm

2.00  
1.93  
1.97  
2.01  
1.00  
3.07

S-215

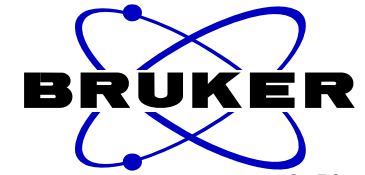

NAME CNMR-gwg-3-53  
EXPNO 2  
PROCNO 1  
Date\_ 20210710  
Time 6.25 h  
INSTRUM Avance  
PROBHD z116098\_0833 (  
PULPROG zgpg30  
TD 65536  
SOLVENT Acetone  
NS 200  
DS 4  
SWH 23809.523 Hz  
FIDRES 0.726609 Hz  
AQ 1.3763061 sec  
RG 47.4244  
DW 21.000 usec  
DE 6.50 usec  
TE 295.1 K  
D1 2.00000000 sec  
D11 0.03000000 sec  
TD0 1  
SFO1 100.6228298 MHz  
NUC1 13C  
P0 3.33 usec  
P1 10.00 usec  
SI 32768  
SF 100.6127685 MHz  
WDW EM  
SSB 0  
LB 1.00 Hz  
GB 0  
PC 1.40

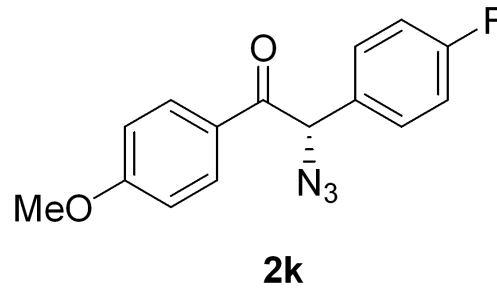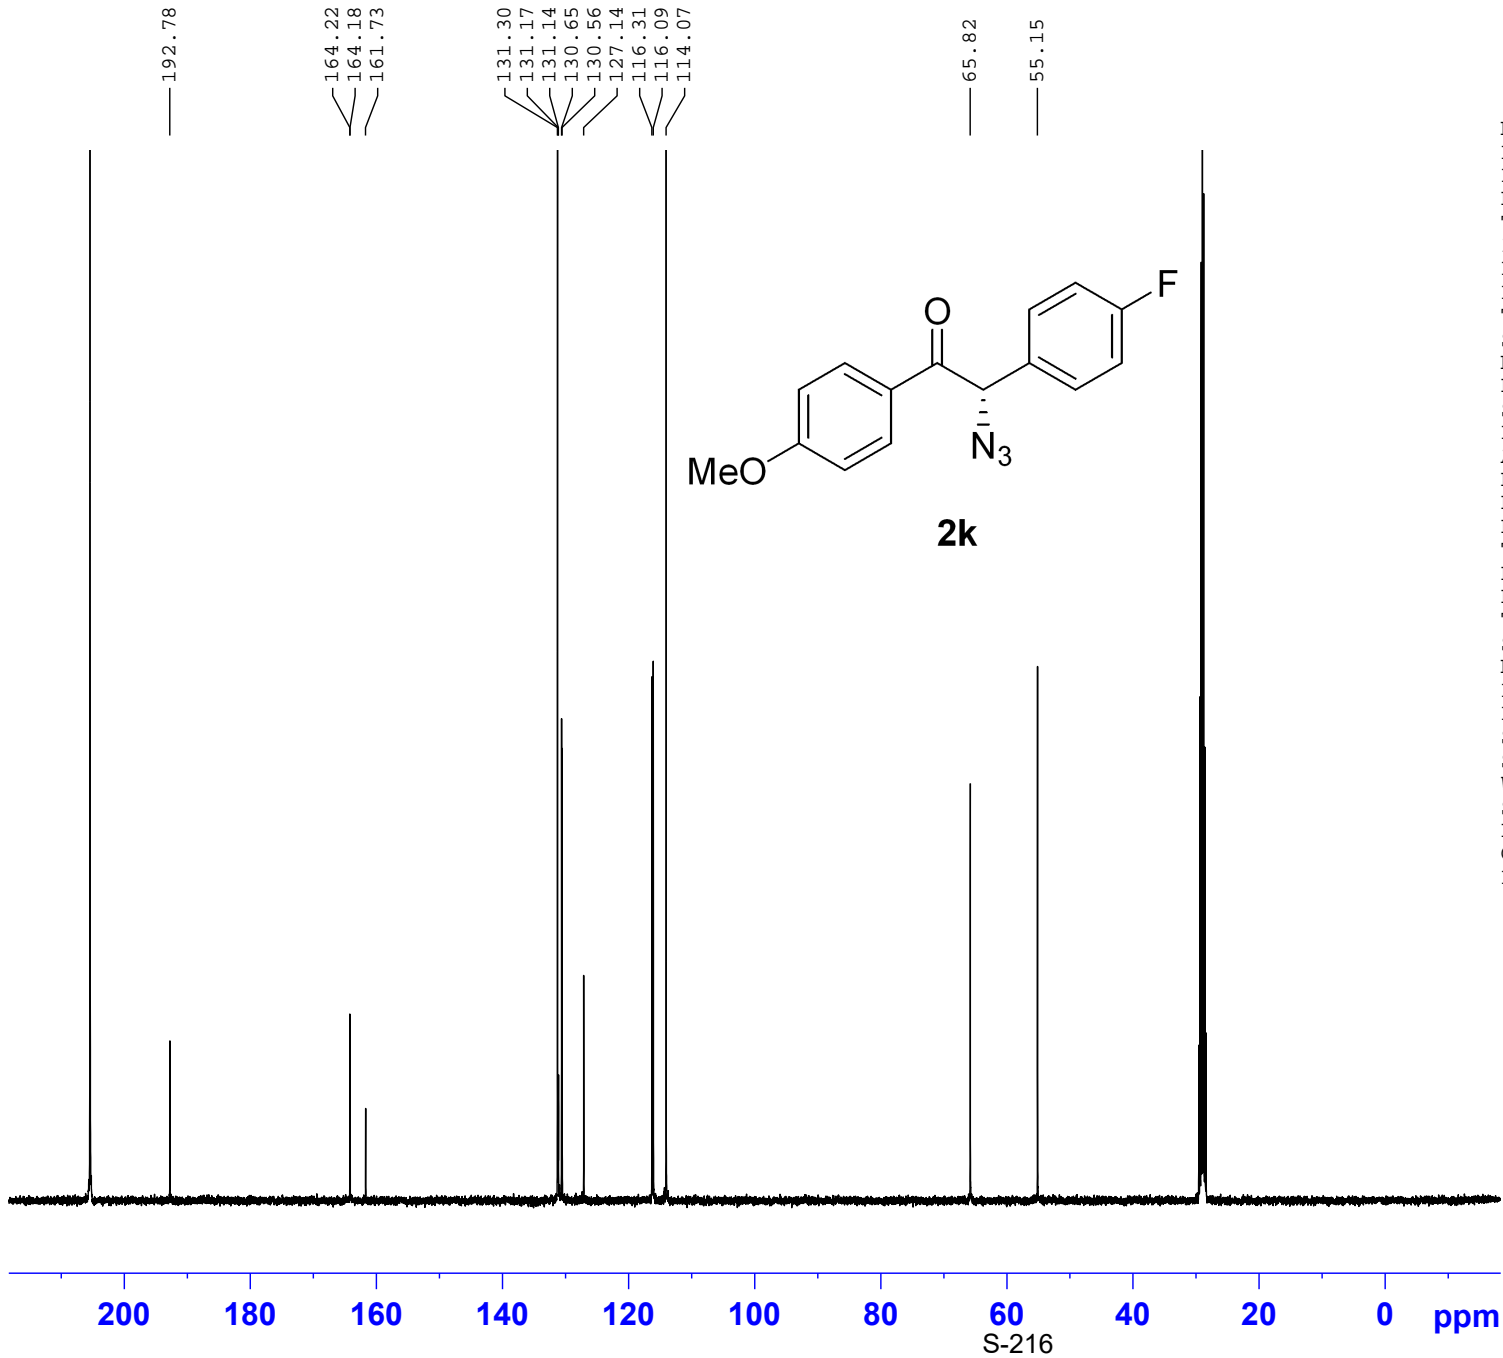





NAME FNMN-gwg-3-53  
EXPNO 3  
PROCNO 1  
Date\_ 20210710  
Time 6.27 h  
INSTRUM Avance  
PROBHD Z116098\_0833 (  
PULPROG zgig  
TD 131072  
SOLVENT Acetone  
NS 16  
DS 4  
SWH 90909.094 Hz  
FIDRES 1.387163 Hz  
AQ 0.7209460 sec  
RG 101  
DW 5.500 usec  
DE 6.50 usec  
TE 294.7 K  
D1 1.00000000 sec  
D11 0.03000000 sec  
TD0 1  
SFO1 376.4607164 MHz  
NUC1 19F  
P1 18.00 usec  
SI 65536  
SF 376.4983662 MHz  
WDW EM  
SSB 0  
LB 0.30 Hz  
GB 0  
PC 1.00

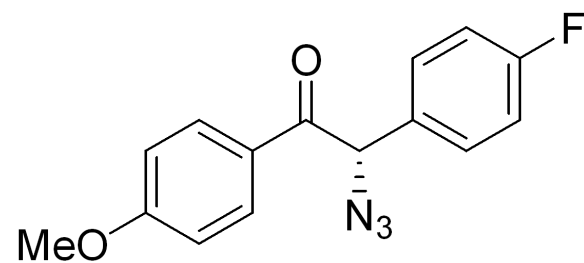

2k

— -113.65

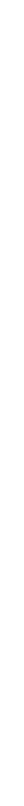

20 0 -20 -40 -60 -80 -100 -120 -140 -160 -180 -200 ppm

S-217

7.79  
7.14  
7.12  
7.11  
7.07  
7.05  
7.03  
7.01  
6.76  
6.76  
6.74  
6.73  
6.72  
6.72  
6.72  
6.71  
6.70  
6.70  
6.68  
6.66  
6.66  
6.33  
6.32  
6.30  
6.29  
6.28  
5.59

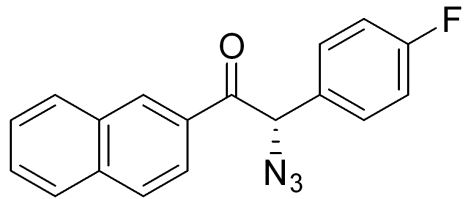

2I

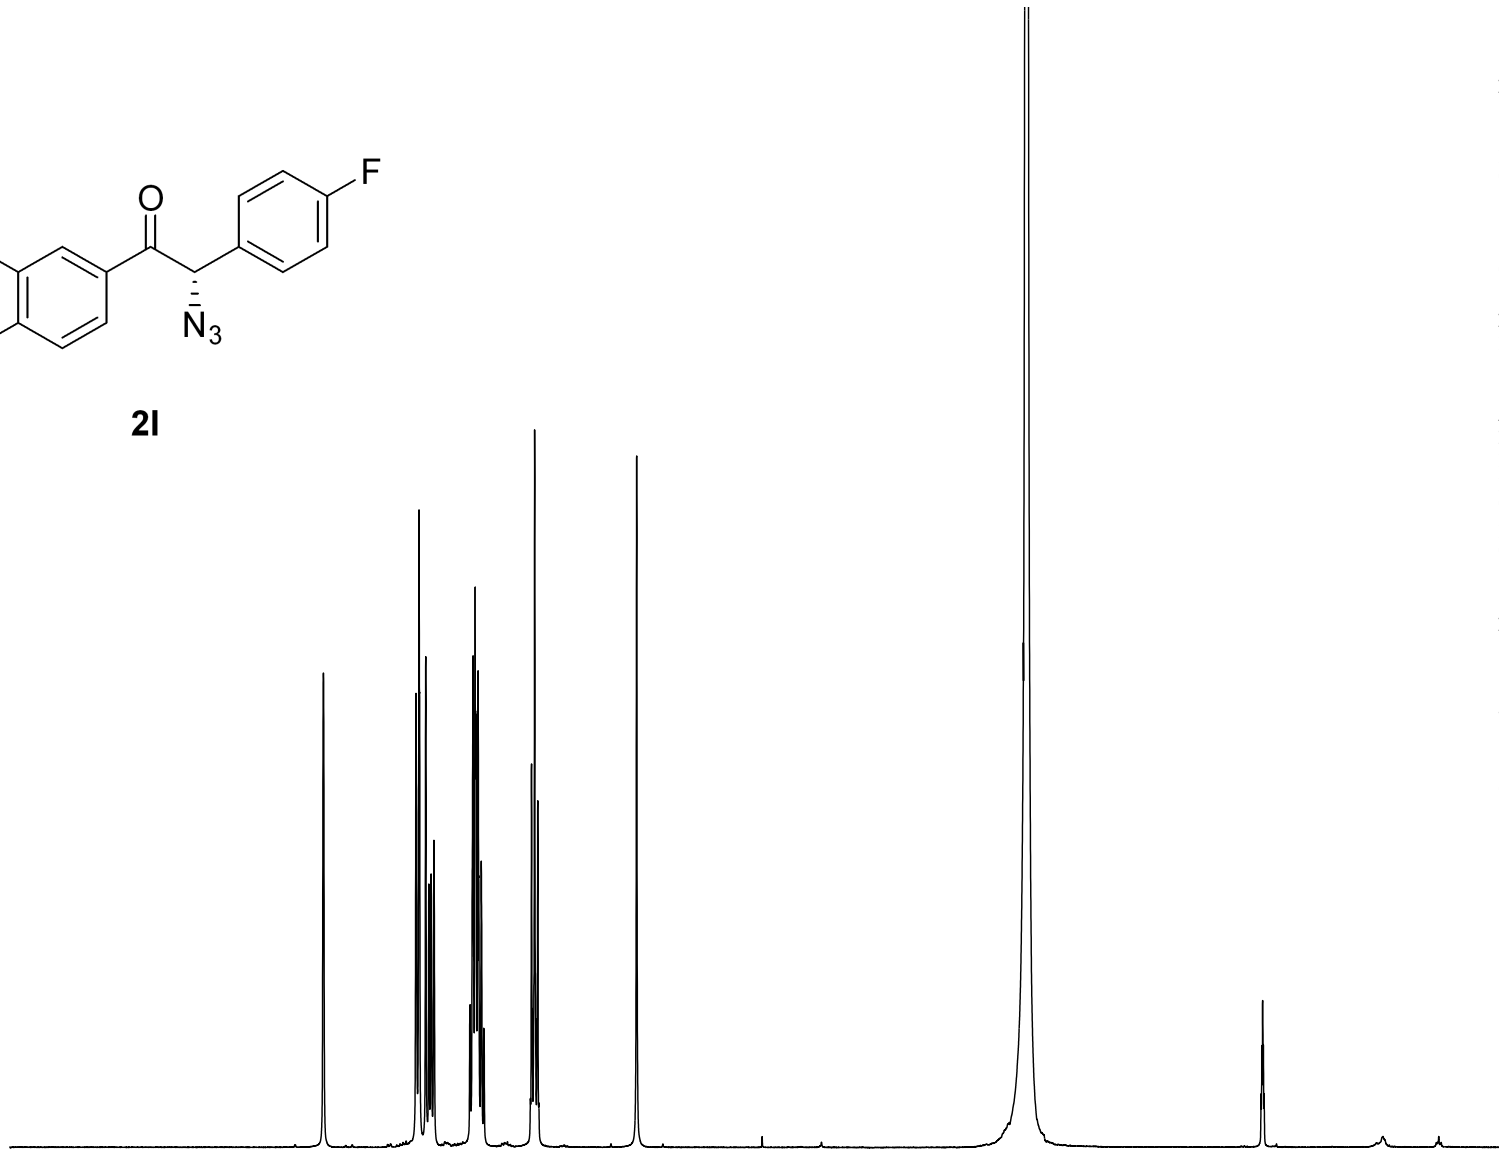

9 8 7 6 5 4 3 2 1 ppm

0.99  
1.97  
1.98  
3.92  
1.94  
1.00

S-218



NAME HNMR-gwg-2-48-2  
EXPNO 188  
PROCNO 1  
Date\_ 20210603  
Time 14.48  
INSTRUM spect  
PROBHD 5 mm PABBO BB-  
PULPROG zg30  
TD 65536  
SOLVENT Acetone  
NS 6  
DS 2  
SWH 8223.685 Hz  
FIDRES 0.125483 Hz  
AQ 3.9846387 sec  
RG 21.42  
DW 60.800 usec  
DE 6.50 usec  
TE 294.5 K  
D1 1.00000000 sec  
TD0 1

==== CHANNEL f1 =====  
NUC1 1H  
P1 14.40 usec  
SI 65536  
SF 400.1903591 MHz  
WDW EM  
SSB 0  
LB 0.30 Hz  
GB 0  
PC 1.00



NAME CNMR-gwg-2-48  
EXPNO 4  
PROCNO 1  
Date\_ 20210602  
Time 20.48 h  
INSTRUM Avance  
PROBHD z116098\_0833 (  
PULPROG zgpg30  
TD 65536  
SOLVENT Acetone  
NS 100  
DS 4  
SWH 23809.523 Hz  
FIDRES 0.726609 Hz  
AQ 1.3763061 sec  
RG 51.55  
DW 21.000 usec  
DE 6.50 usec  
TE 294.7 K  
D1 2.00000000 sec  
D11 0.03000000 sec  
TD0 1  
SFO1 100.6228298 MHz  
NUC1 13C  
P0 3.33 usec  
P1 10.00 usec  
SI 32768  
SF 100.6127685 MHz  
WDW EM  
SSB 0  
LB 1.00 Hz  
GB 0  
PC 1.40

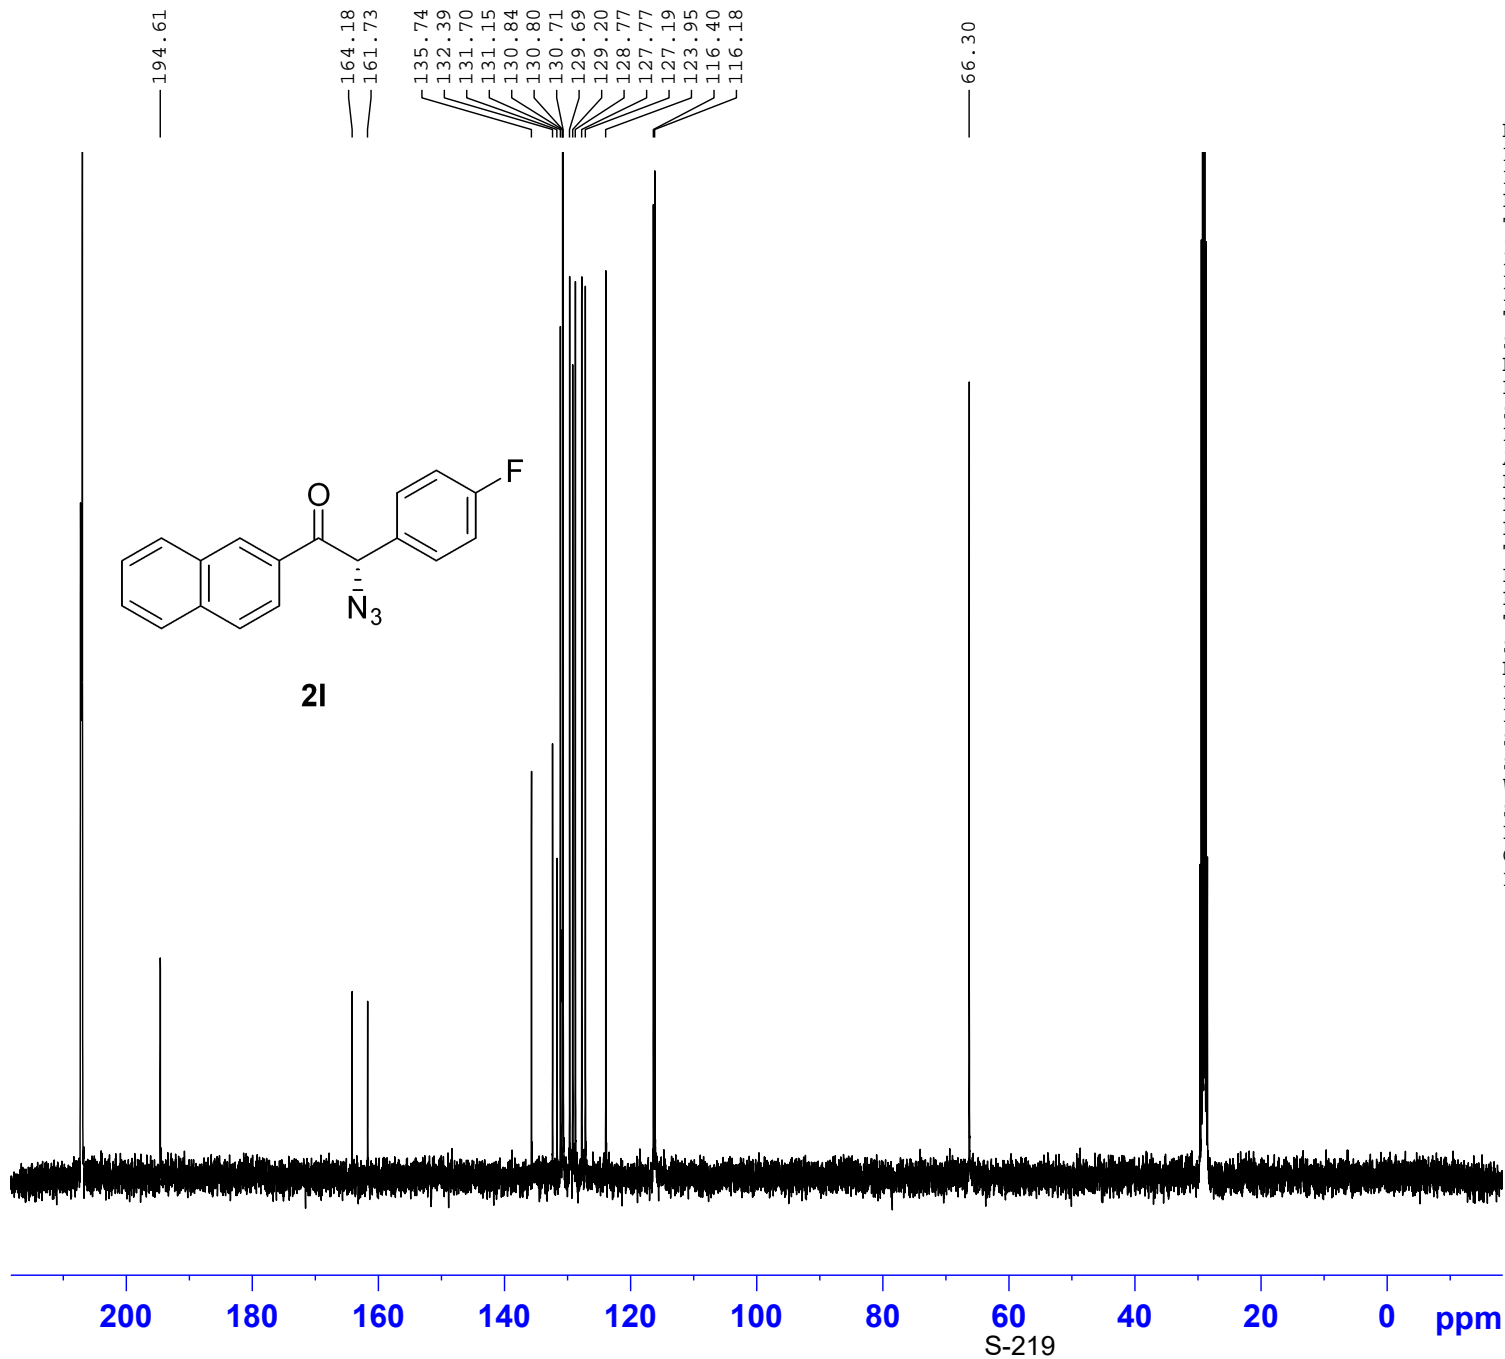



NAME FNMN-gwg-2-48  
EXPNO 5  
PROCNO 1  
Date\_ 20210602  
Time 20.49 h  
INSTRUM Avance  
PROBHD Z116098\_0833 (  
PULPROG zgig  
TD 131072  
SOLVENT Acetone  
NS 16  
DS 4  
SWH 90909.094 Hz  
FIDRES 1.387163 Hz  
AQ 0.7209460 sec  
RG 101  
DW 5.500 usec  
DE 6.50 usec  
TE 294.4 K  
D1 1.00000000 sec  
D11 0.03000000 sec  
TD0 1  
SF01 376.4607164 MHz  
NUC1 19F  
P1 18.00 usec  
SI 65536  
SF 376.4983662 MHz  
WDW EM  
SSB 0  
LB 0.30 Hz  
GB 0  
PC 1.00

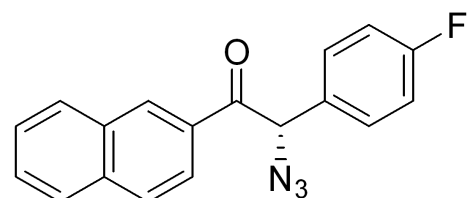

2I

— -113.37

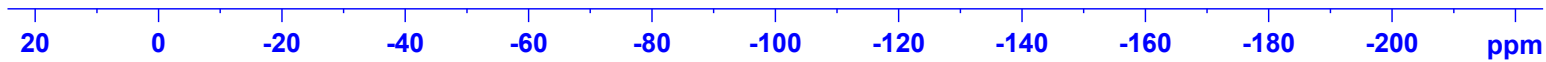

S-220

7.66  
7.59  
7.58  
7.57  
7.57  
7.56  
7.56  
7.55  
7.54  
7.25  
7.25  
7.24  
7.23  
7.23  
7.22  
7.21  
6.27

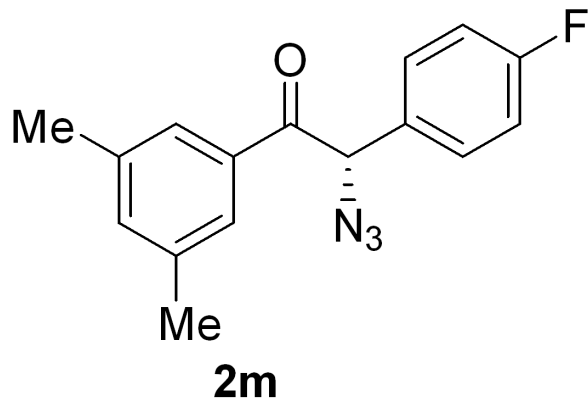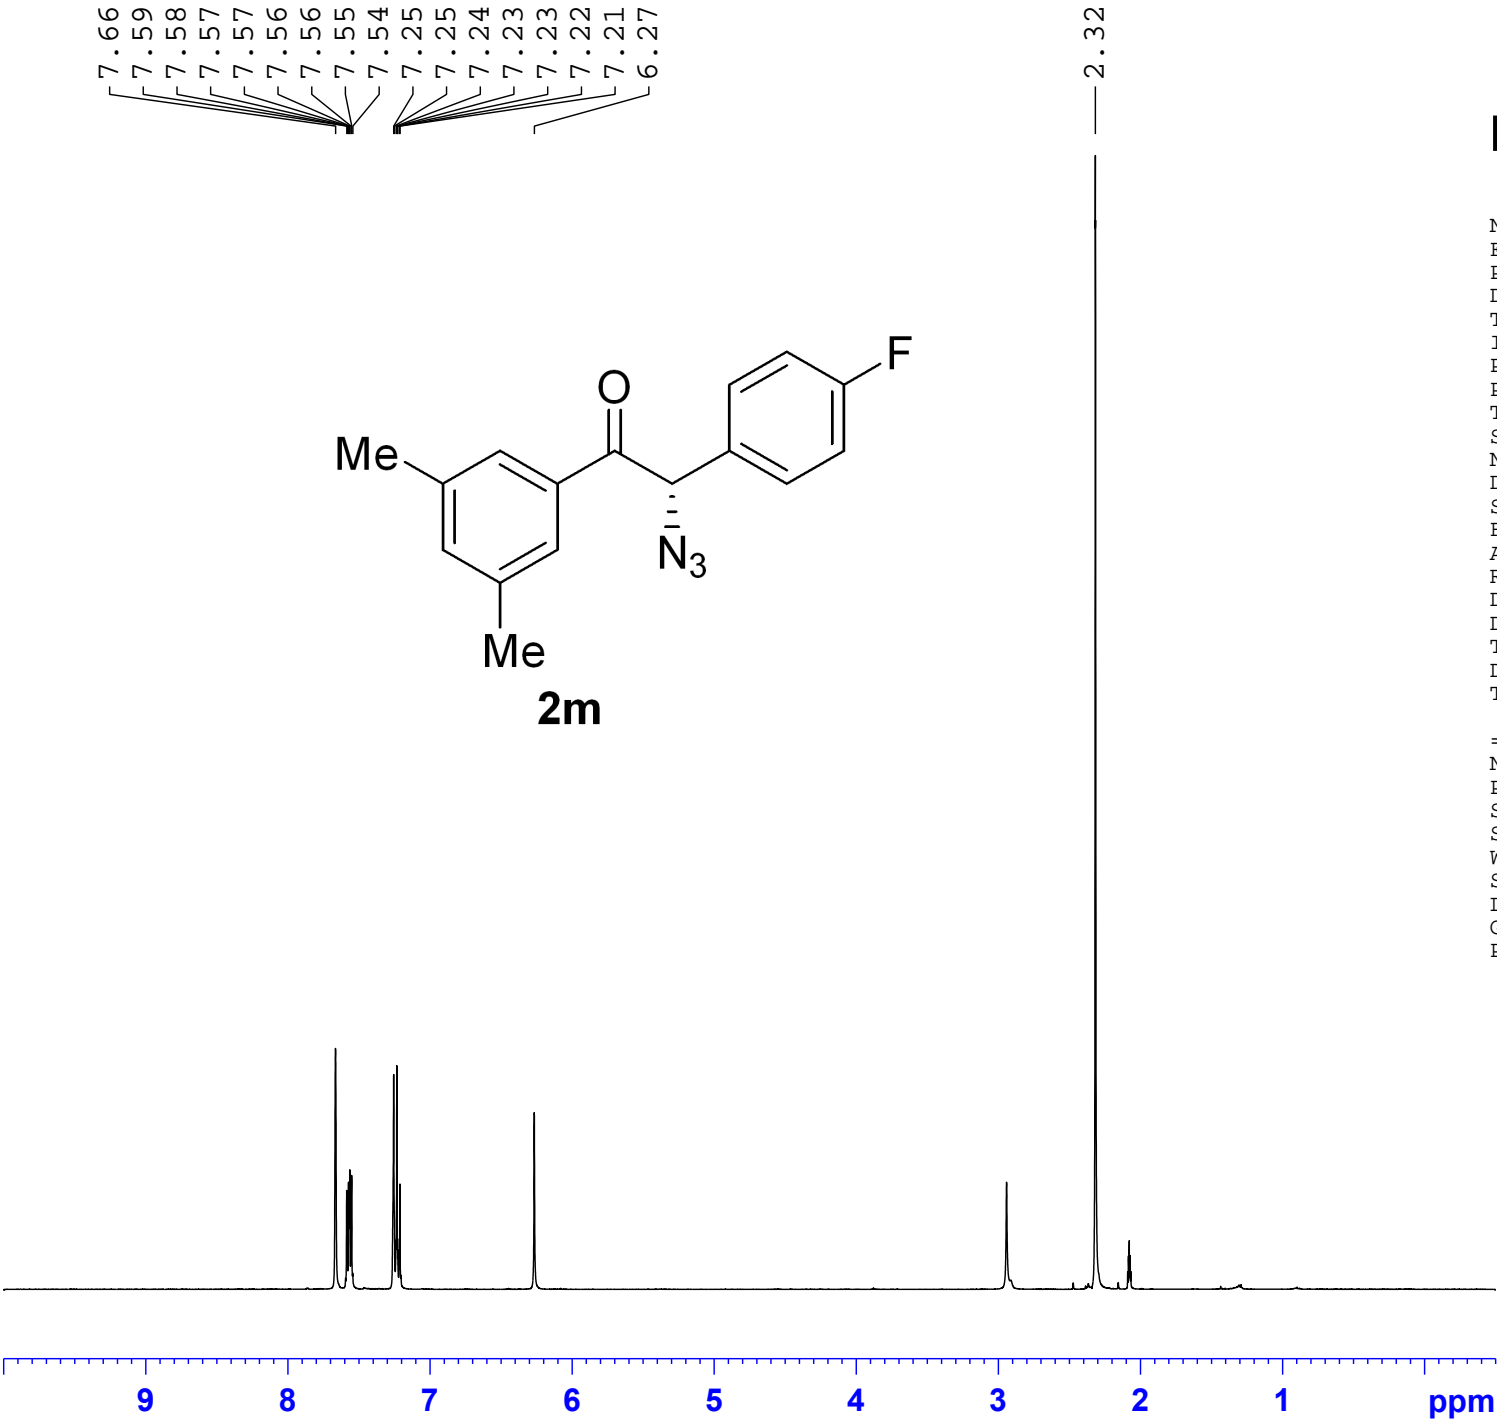

NAME HNMR-gwg-3-5  
EXPNO 59  
PROCNO 1  
Date\_ 20210624  
Time 14.42  
INSTRUM spect  
PROBHD 5 mm PABBO BB-  
PULPROG zg30  
TD 65536  
SOLVENT Acetone  
NS 6  
DS 2  
SWH 8223.685 Hz  
FIDRES 0.125483 Hz  
AQ 3.9846387 sec  
RG 68.24  
DW 60.800 usec  
DE 6.50 usec  
TE 294.9 K  
D1 1.00000000 sec  
TD0 1

===== CHANNEL f1 =====  
NUC1 1H  
P1 14.40 usec  
SI 65536  
SF 400.1900000 MHz  
WDW EM  
SSB 0  
LB 0.30 Hz  
GB 0  
PC 1.00

S-221

1.99  
2.06  
3.00

1.05

6.32

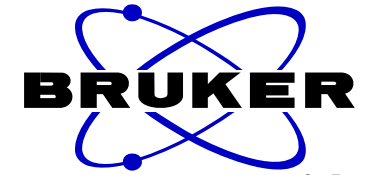

NAME CNMR-gwg-3-5  
EXPNO 60  
PROCNO 1  
Date\_ 20210624  
Time 14.58  
INSTRUM spect  
PROBHD 5 mm PABBO BB-  
PULPROG zgpg30  
TD 65536  
SOLVENT Acetone  
NS 258  
DS 4  
SWH 24038.461 Hz  
FIDRES 0.366798 Hz  
AQ 1.3631988 sec  
RG 193.13  
DW 20.800 usec  
DE 6.50 usec  
TE 295.2 K  
D1 2.00000000 sec  
D11 0.03000000 sec  
TD0 1

==== CHANNEL f1 =====  
NUC1 13C  
P1 9.90 usec  
SI 32768  
SF 100.6278560 MHz  
WDW EM  
SSB 0  
LB 1.00 Hz  
GB 0  
PC 1.40

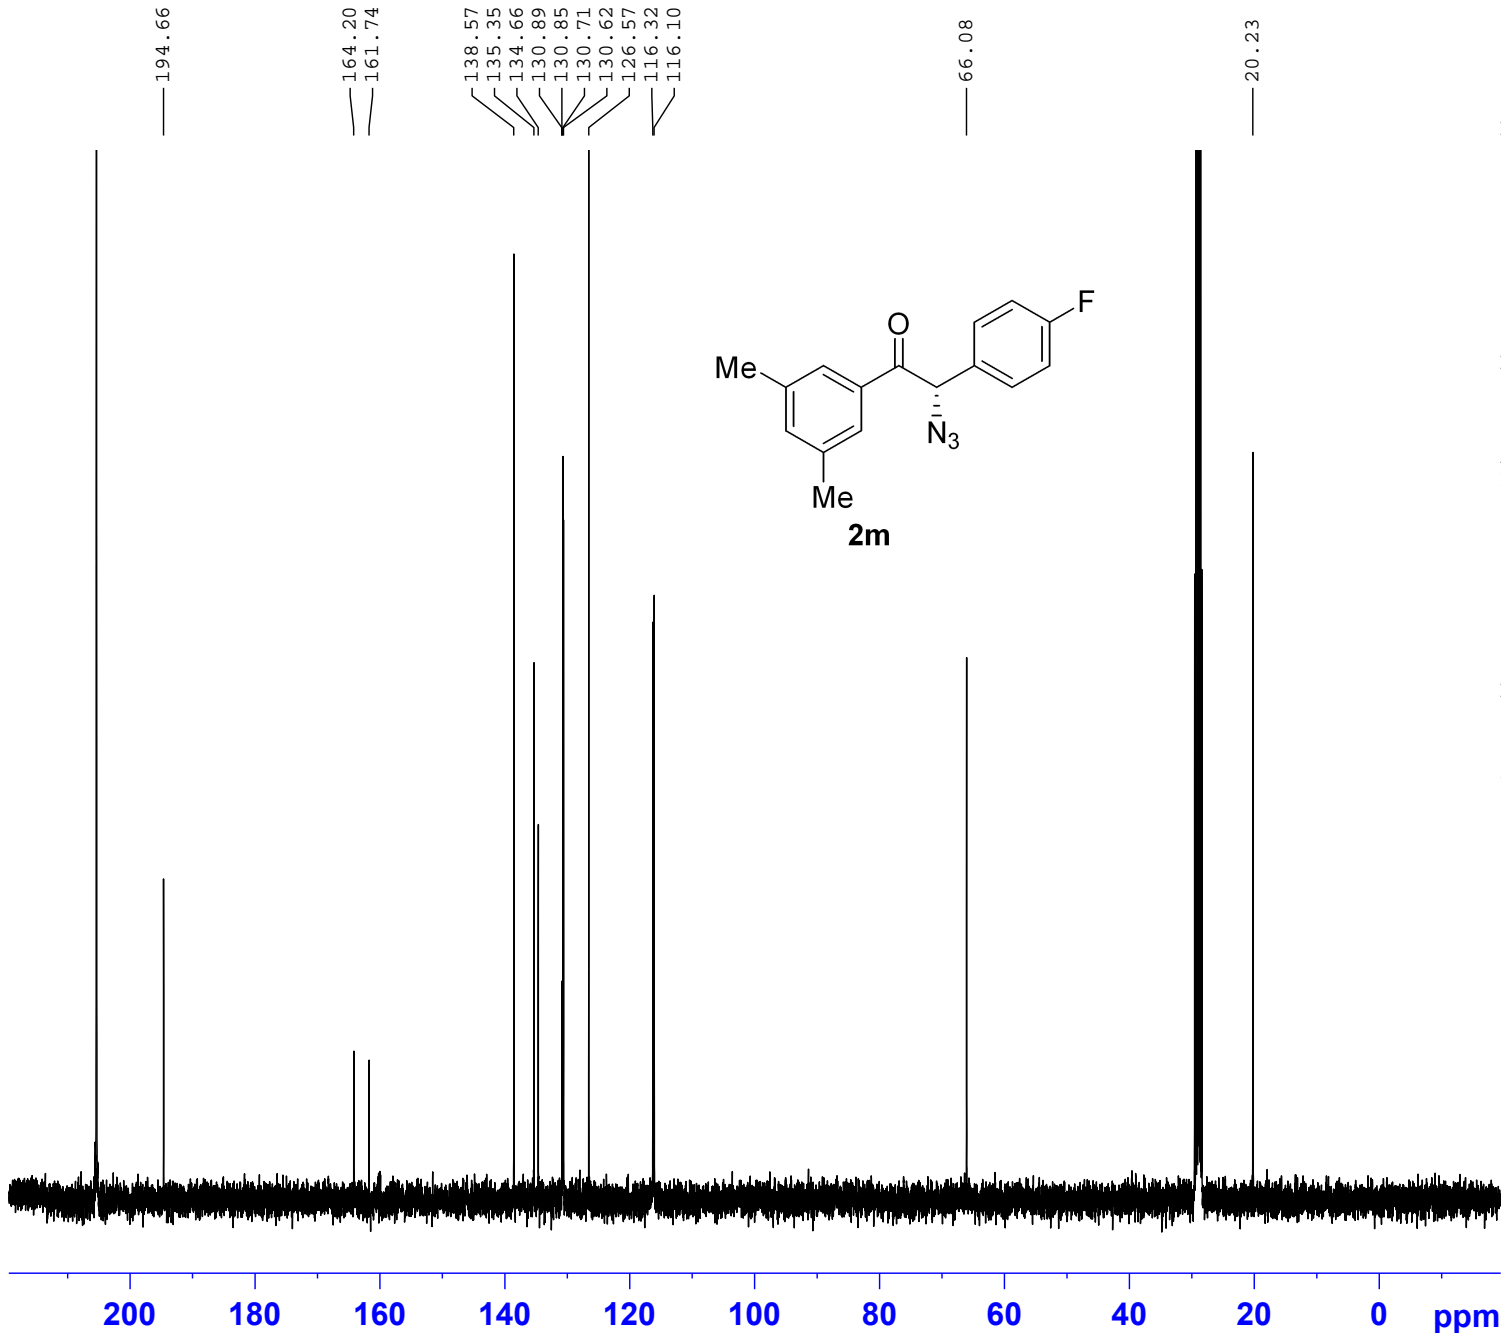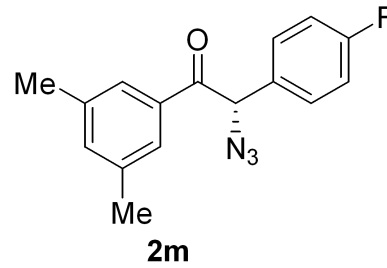



NAME FNMR-gwg-3-5  
EXPNO 4288  
PROCNO 1  
Date\_ 20210625  
Time 12.13  
INSTRUM spect  
PROBHD 5 mm PABBO BB-  
PULPROG zgfhigqn.2  
TD 131072  
SOLVENT Acetone  
NS 16  
DS 4  
SWH 66964.289 Hz  
FIDRES 0.510897 Hz  
AQ 0.9787210 sec  
RG 203  
DW 7.467 usec  
DE 6.50 usec  
TE 296.1 K  
D1 1.00000000 sec  
D11 0.03000000 sec  
D12 0.00002000 sec  
TD0 1

==== CHANNEL f1 =====  
SFO1 282.3761148 MHz  
NUC1 19F  
P1 14.50 usec  
SI 65536  
SF 282.4043552 MHz  
WDW EM  
SSB 0  
LB 0.30 Hz  
GB 0  
PC 1.00

— -113.64

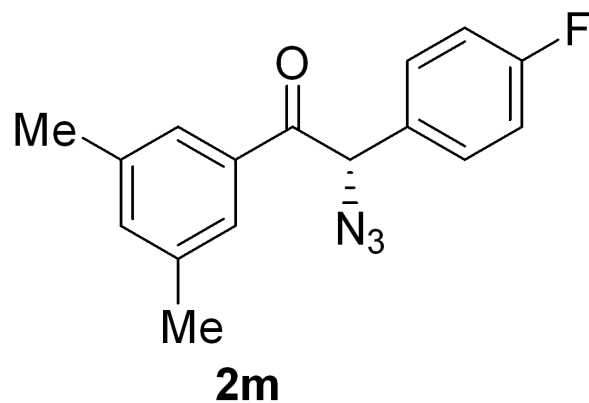

S-223

8.07  
8.05  
7.66  
7.64  
7.59  
7.59  
7.58  
7.57  
7.55  
7.54  
7.53  
7.52  
7.51  
7.49  
7.46  
7.45  
7.44  
7.44  
7.43  
6.33



NAME HNMR-gwg-3-23  
EXPNO 5  
PROCNO 1  
Date\_ 20210630  
Time 6.51 h  
INSTRUM Avance  
PROBHD z116098\_0833 (  
PULPROG zg30  
TD 65536  
SOLVENT Acetone  
NS 16  
DS 2  
SWH 8196.722 Hz  
FIDRES 0.250144 Hz  
AQ 3.9977460 sec  
RG 101  
DW 61.000 usec  
DE 13.54 usec  
TE 294.8 K  
D1 1.00000000 sec  
TD0 1  
SFO1 400.1324708 MHz  
NUC1 1H  
P0 3.33 usec  
P1 10.00 usec  
SI 65536  
SF 400.1300000 MHz  
WDW EM  
SSB 0  
LB 0.30 Hz  
GB 0  
PC 1.00

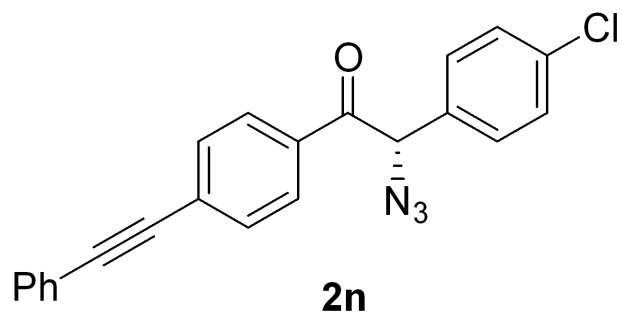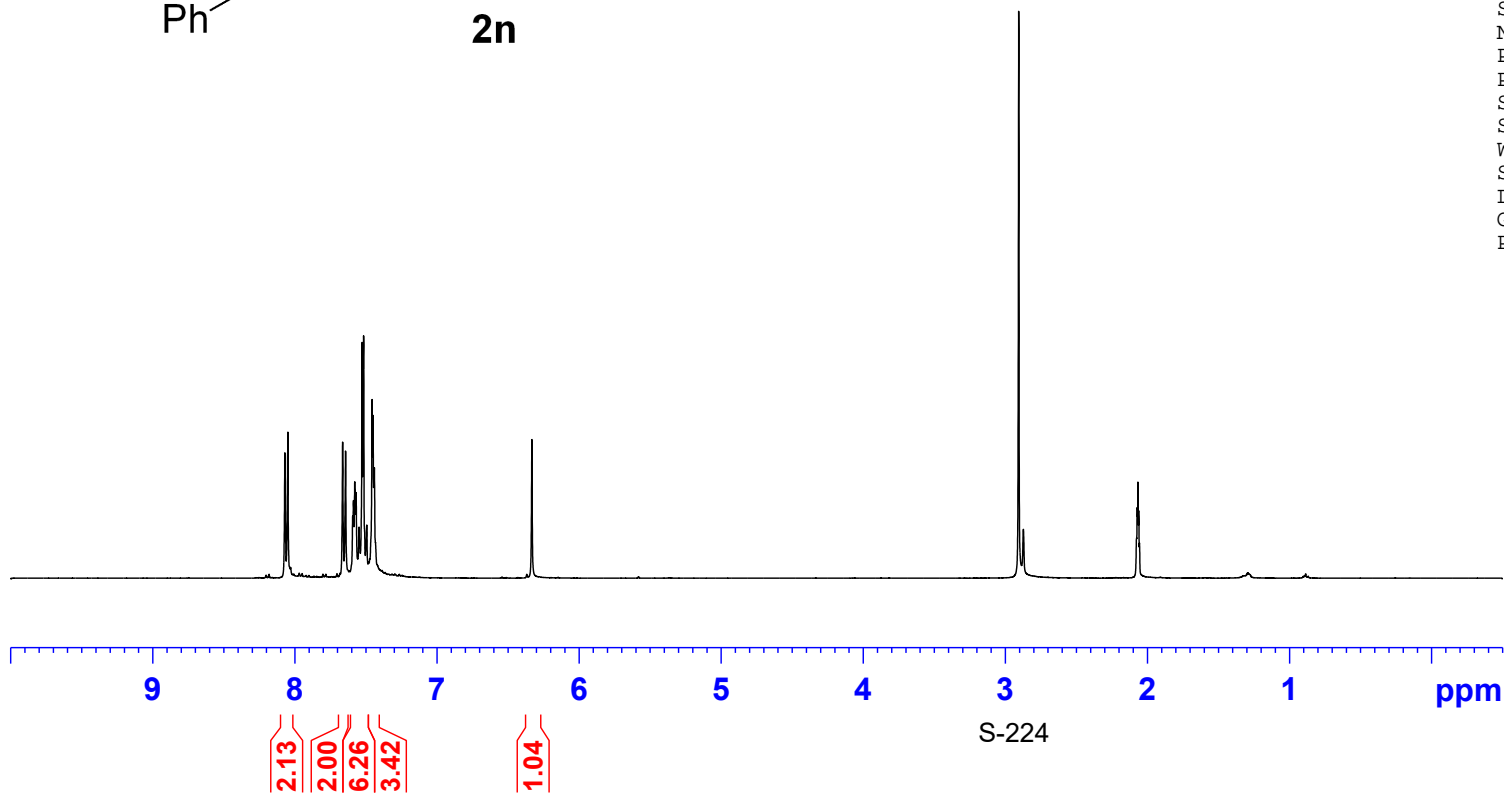





NAME CNMR-gwg-3-23  
EXPNO 6  
PROCNO 1  
Date\_ 20210630  
Time 7.02 h  
INSTRUM Avance  
PROBHD z116098\_0833 (  
PULPROG zgpg30  
TD 65536  
SOLVENT Acetone  
NS 160  
DS 4  
SWH 23809.523 Hz  
FIDRES 0.726609 Hz  
AQ 1.3763061 sec  
RG 51.55  
DW 21.000 usec  
DE 6.50 usec  
TE 295.2 K  
D1 2.00000000 sec  
D11 0.03000000 sec  
TD0 1  
SFO1 100.6228298 MHz  
NUC1 13C  
P0 3.33 usec  
P1 10.00 usec  
SI 32768  
SF 100.6127685 MHz  
WDW EM  
SSB 0  
LB 1.00 Hz  
GB 0  
PC 1.40

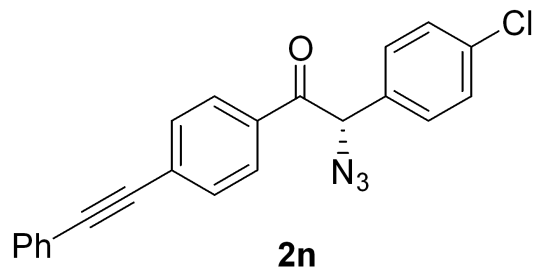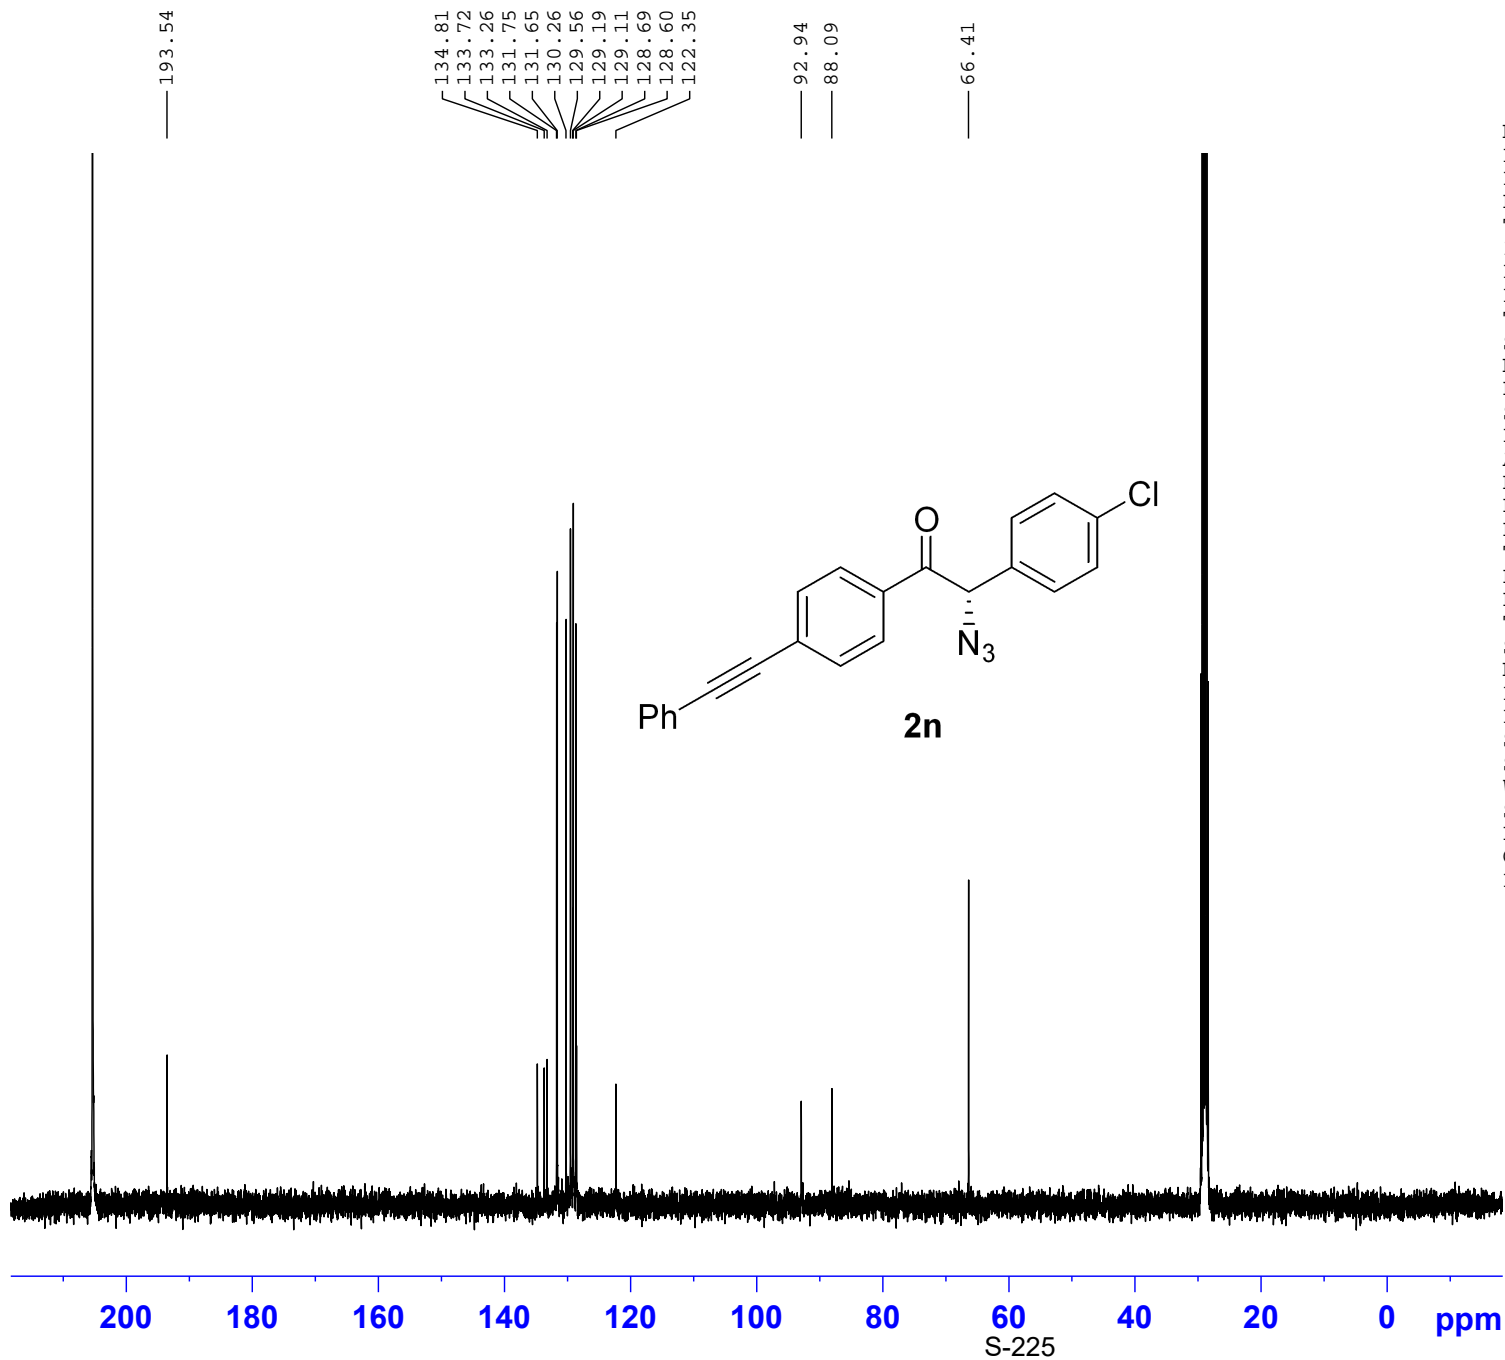

7.78  
7.78  
7.78  
7.41  
7.41  
7.39  
7.35  
7.34  
7.34  
7.33  
7.32  
7.31  
7.29  
7.29  
7.29  
7.28  
7.27  
7.27  
7.26  
7.26  
7.04  
7.03  
7.03  
7.02  
5.92

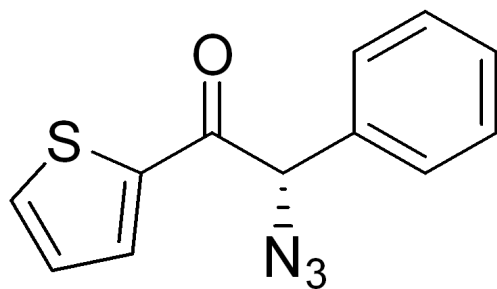

**2o**

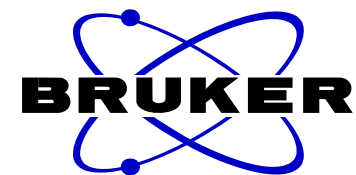

NAME HNMR-gwg-3-4  
EXPNO 1  
PROCNO 1  
Date\_ 20210622  
Time 22.43 h  
INSTRUM Avance  
PROBHD z116098\_0833 (  
PULPROG zg30  
TD 65536  
SOLVENT Acetone  
NS 16  
DS 2  
SWH 8196.722 Hz  
FIDRES 0.250144 Hz  
AQ 3.9977460 sec  
RG 101  
DW 61.000 usec  
DE 13.54 usec  
TE 294.5 K  
D1 1.00000000 sec  
TD0 1  
SFO1 400.1324708 MHz  
NUC1 1H  
P0 3.33 usec  
P1 10.00 usec  
SI 65536  
SF 400.1300627 MHz  
WDW EM  
SSB 0  
LB 0.30 Hz  
GB 0  
PC 1.00

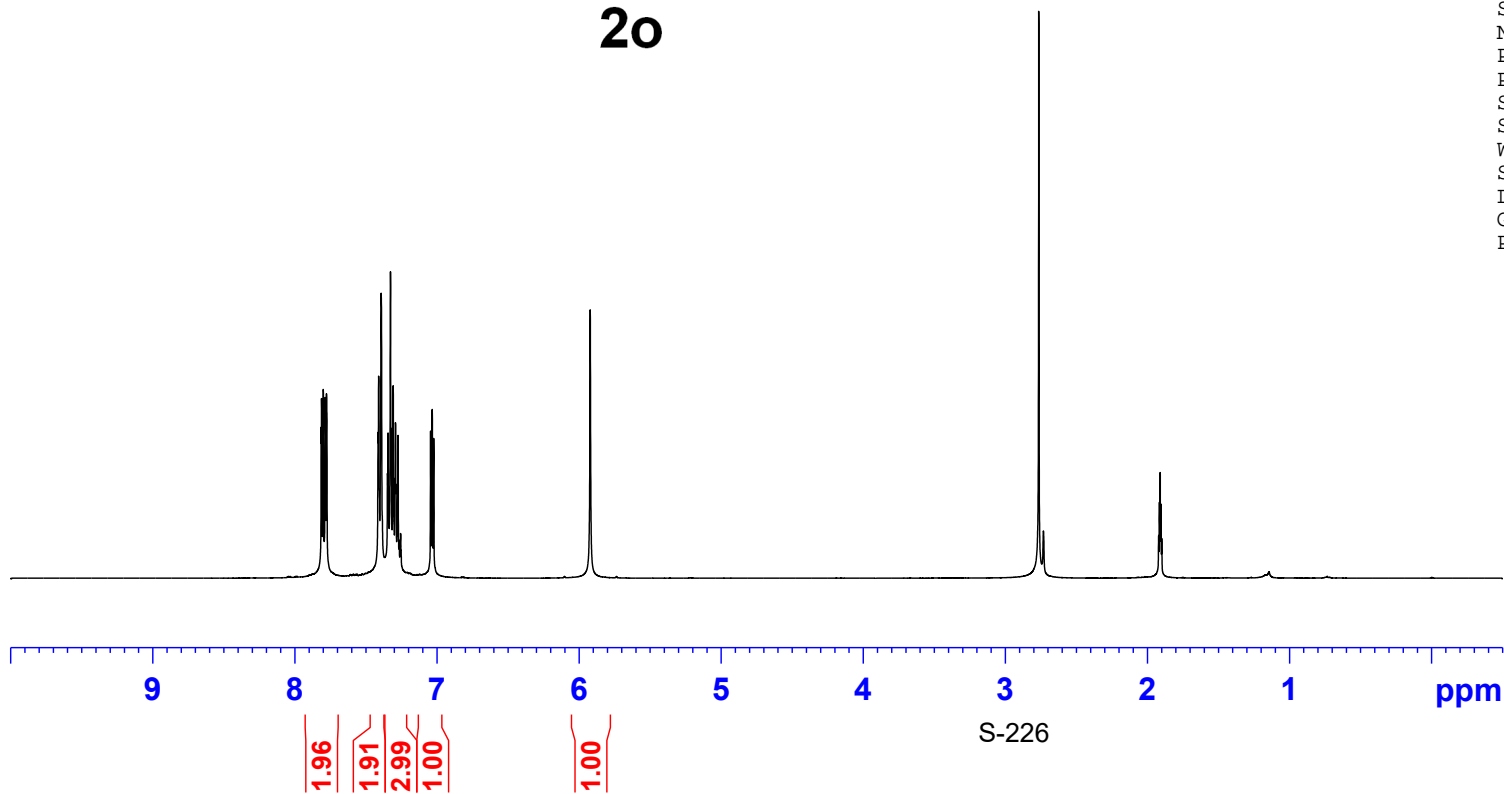



NAME CNMR-gwg-3-4  
EXPNO 2  
PROCNO 1  
Date\_ 20210622  
Time 22.56 h  
INSTRUM Avance  
PROBHD z116098\_0833 (  
PULPROG zgpg30  
TD 65536  
SOLVENT Acetone  
NS 200  
DS 4  
SWH 23809.523 Hz  
FIDRES 0.726609 Hz  
AQ 1.3763061 sec  
RG 47.4244  
DW 21.000 usec  
DE 6.50 usec  
TE 295.1 K  
D1 2.00000000 sec  
D11 0.03000000 sec  
TD0 1  
SFO1 100.6228298 MHz  
NUC1 13C  
P0 3.33 usec  
P1 10.00 usec  
SI 32768  
SF 100.6127685 MHz  
WDW EM  
SSB 0  
LB 1.00 Hz  
GB 0  
PC 1.40

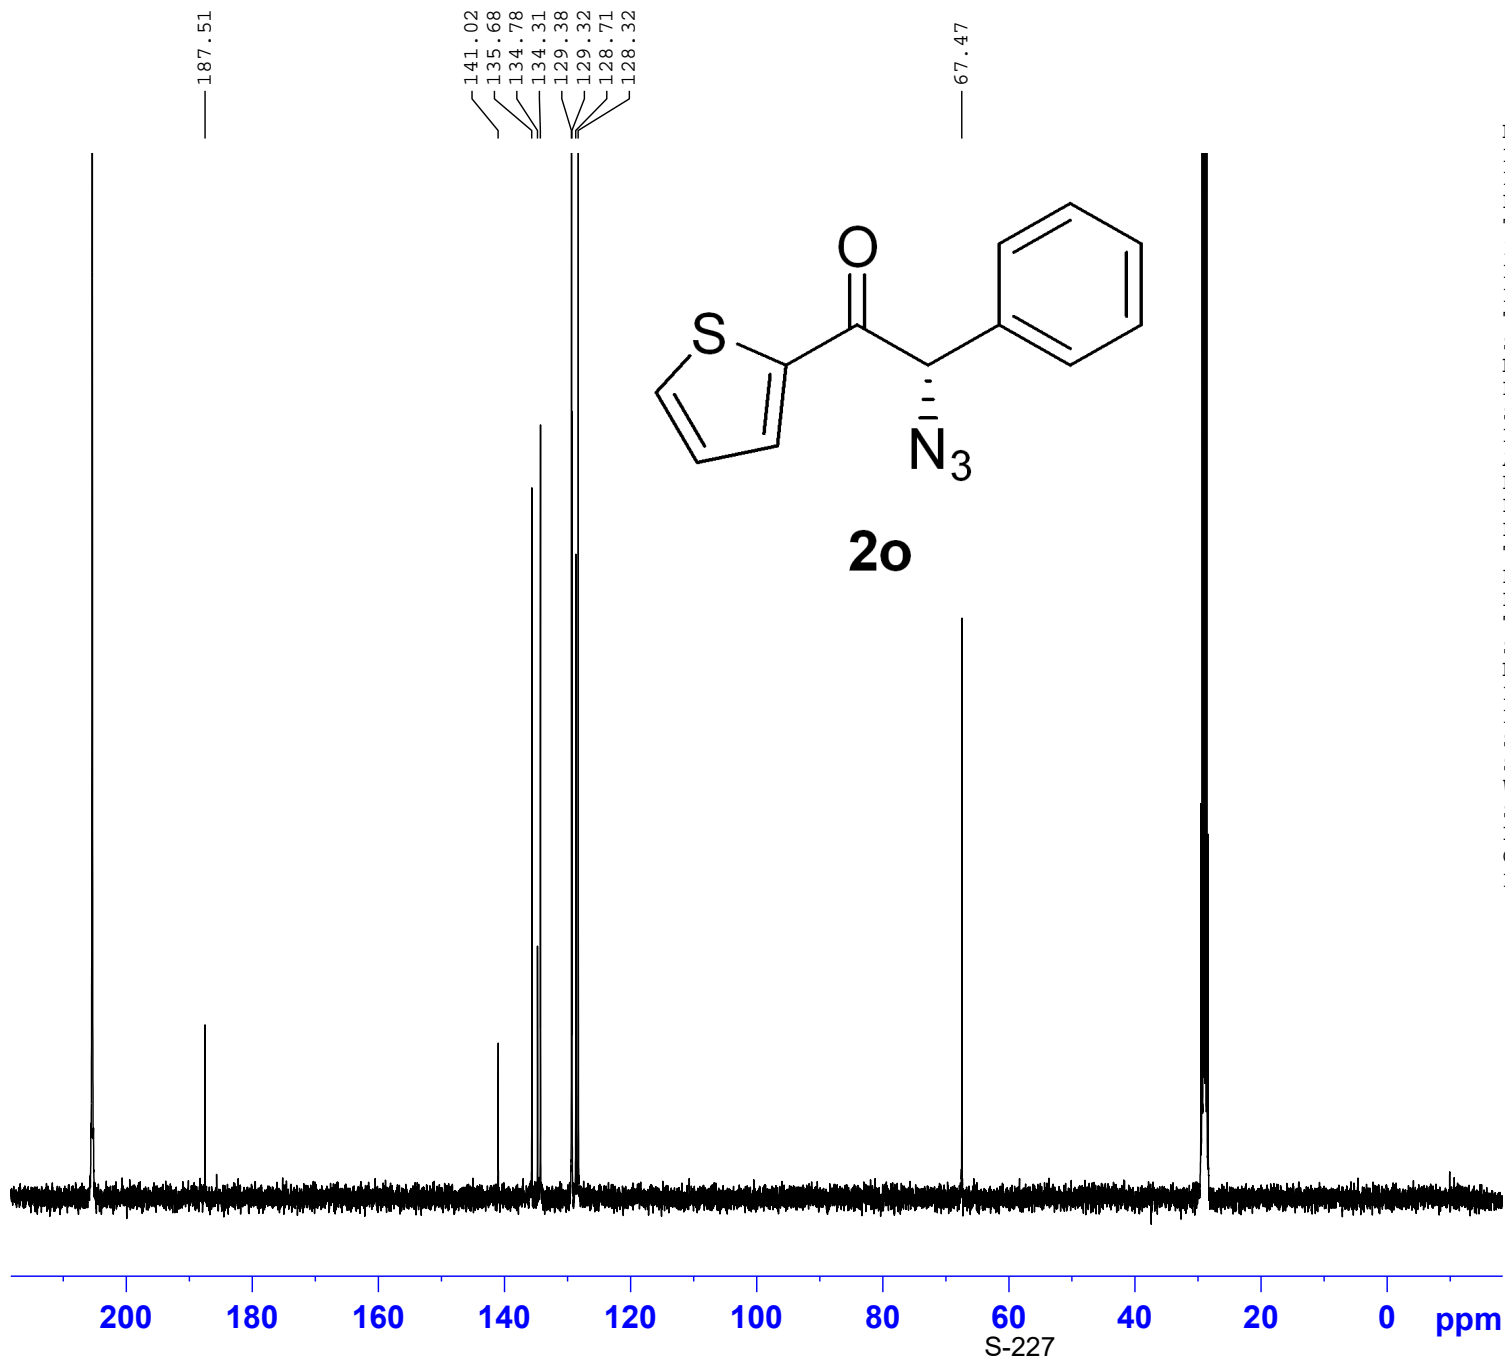

7.90  
7.61  
7.61  
7.60  
7.59  
7.58  
7.58  
7.52  
7.51  
7.29  
7.28  
7.28  
7.26  
7.26  
7.25  
7.24  
7.24  
6.71  
6.70  
6.70  
6.69  
6.01



NAME HNMR-gwg-3-3  
EXPNO 102  
PROCNO 1  
Date\_ 20210706  
Time 14.45  
INSTRUM spect  
PROBHD 5 mm PABBO BB-  
PULPROG zg30  
TD 65536  
SOLVENT Acetone  
NS 6  
DS 2  
SWH 8223.685 Hz  
FIDRES 0.125483 Hz  
AQ 3.9846387 sec  
RG 100.49  
DW 60.800 usec  
DE 6.50 usec  
TE 294.6 K  
D1 1.00000000 sec  
TD0 1

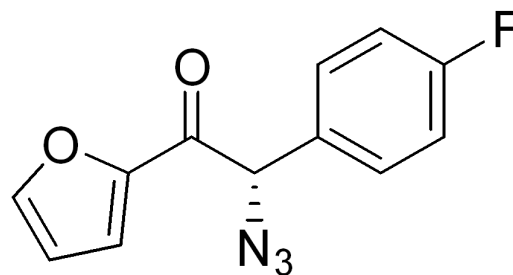

2p

===== CHANNEL f1 =====  
NUC1 1H  
P1 14.40 usec  
SI 65536  
SF 400.1900000 MHz  
WDW EM  
SSB 0  
LB 0.30 Hz  
GB 0  
PC 1.00

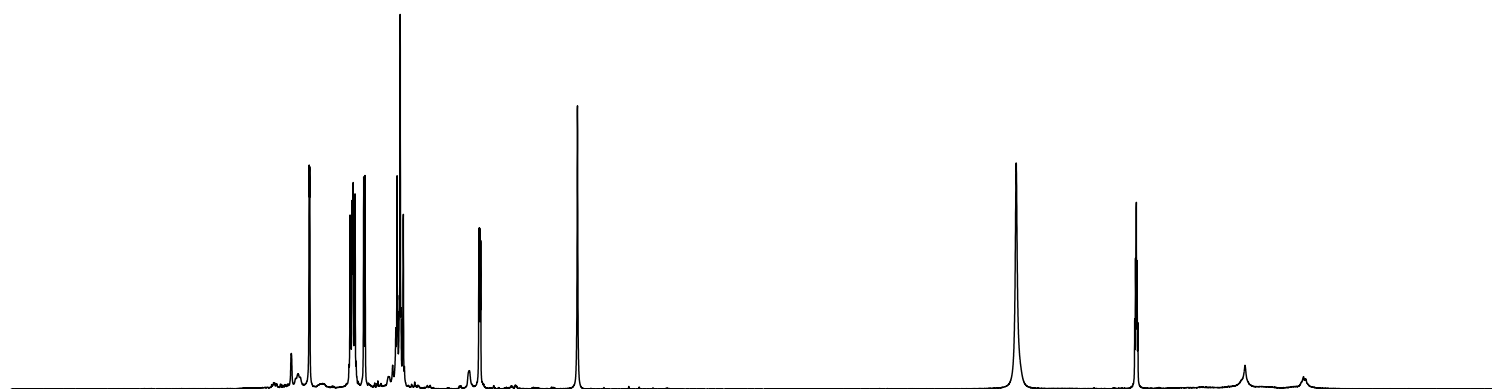

9 8 7 6 5 4 3 2 1 ppm

1.00  
2.12  
1.05  
1.99  
1.02  
1.00

S-228



NAME CNMR-gwg-3-3  
EXPNO 105  
PROCNO 1  
Date\_ 20210706  
Time 15.03  
INSTRUM spect  
PROBHD 5 mm PABBO BB-  
PULPROG zgpg30  
TD 65536  
SOLVENT Acetone  
NS 106  
DS 4  
SWH 24038.461 Hz  
FIDRES 0.366798 Hz  
AQ 1.3631988 sec  
RG 193.13  
DW 20.800 usec  
DE 6.50 usec  
TE 295.1 K  
D1 2.00000000 sec  
D11 0.03000000 sec  
TD0 1

==== CHANNEL f1 =====  
NUC1 13C  
P1 9.90 usec  
SI 32768  
SF 100.6278560 MHz  
WDW EM  
SSB 0  
LB 1.00 Hz  
GB 0  
PC 1.40

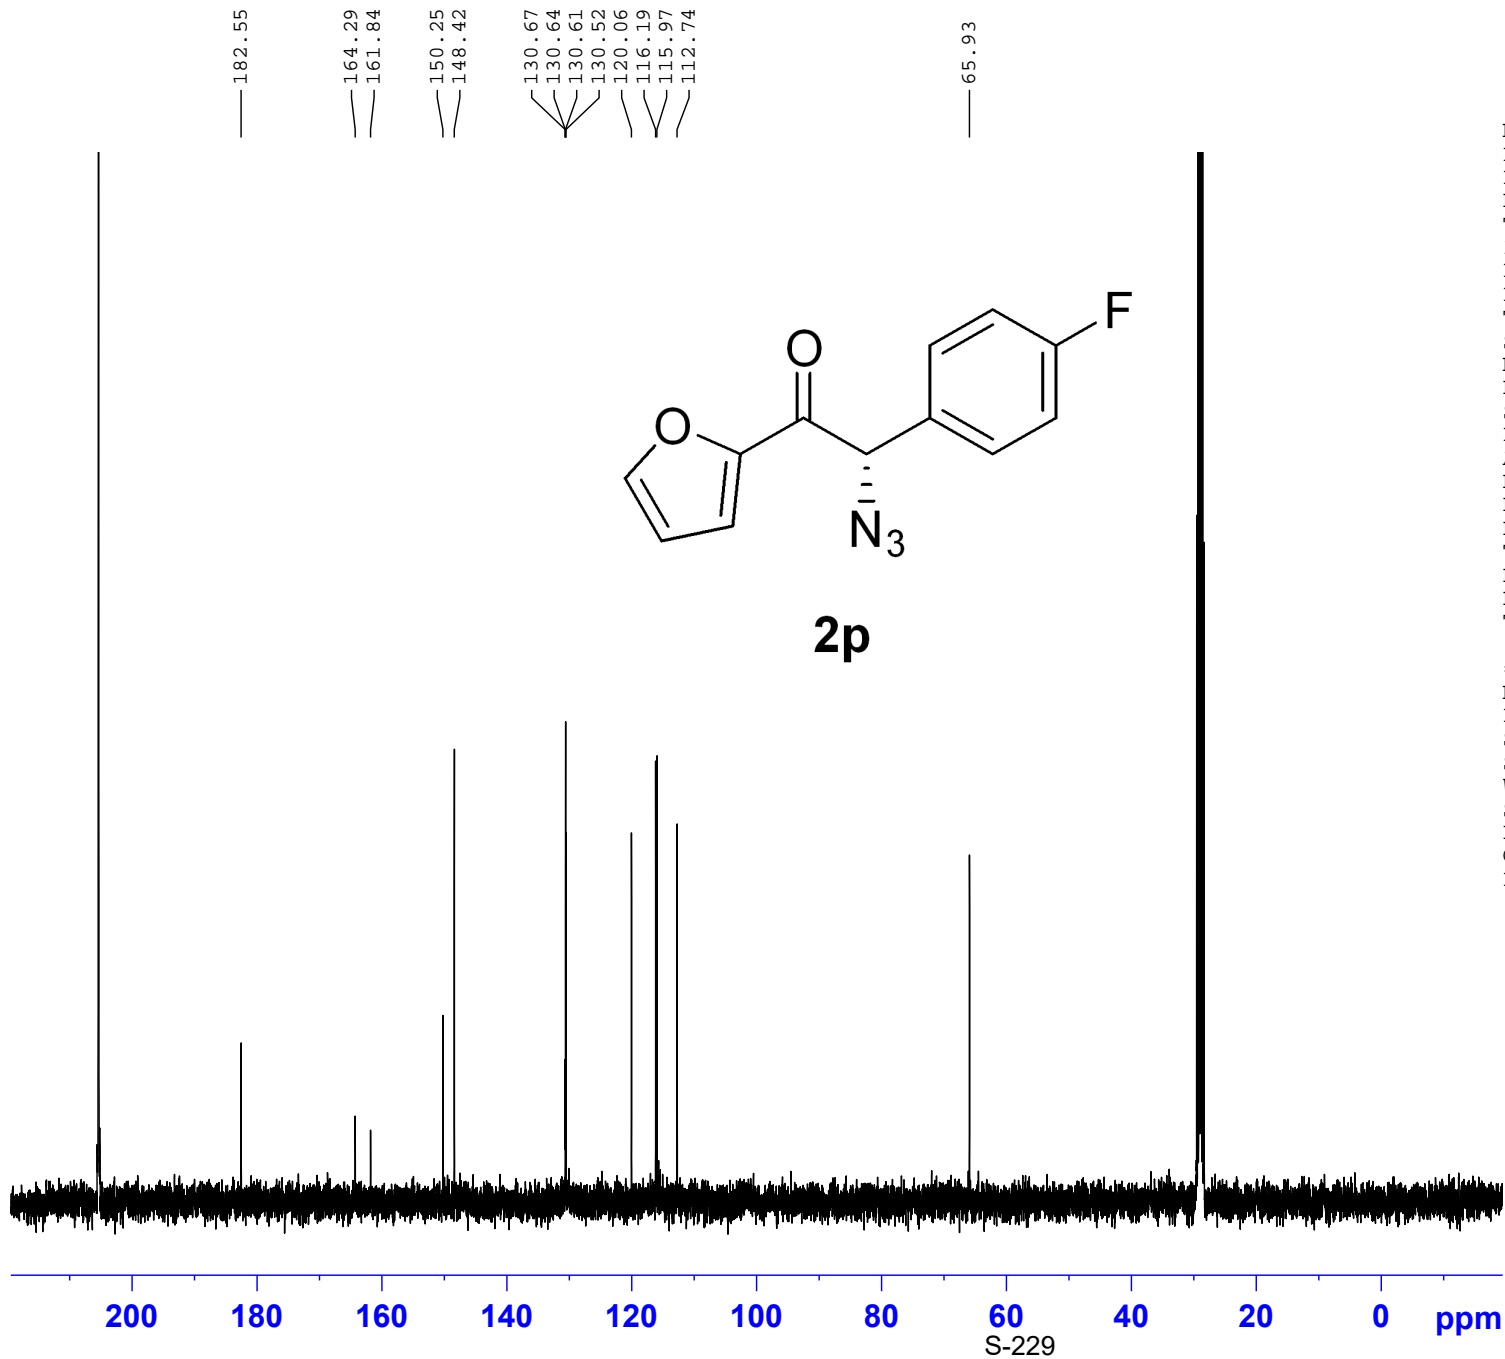



NAME FNMN-gwg-3-3  
EXPNO 4461  
PROCNO 1  
Date\_ 20210707  
Time 9.12  
INSTRUM spect  
PROBHD 5 mm PABBO BB-  
PULPROG zgfhigqn.2  
TD 131072  
SOLVENT Acetone  
NS 16  
DS 4  
SWH 66964.289 Hz  
FIDRES 0.510897 Hz  
AQ 0.9787210 sec  
RG 203  
DW 7.467 usec  
DE 6.50 usec  
TE 296.2 K  
D1 1.00000000 sec  
D11 0.03000000 sec  
D12 0.00002000 sec  
TD0 1

==== CHANNEL f1 =====  
SFO1 282.3761148 MHz  
NUC1 19F  
P1 14.50 usec  
SI 65536  
SF 282.4043552 MHz  
WDW EM  
SSB 0  
LB 0.30 Hz  
GB 0  
PC 1.00

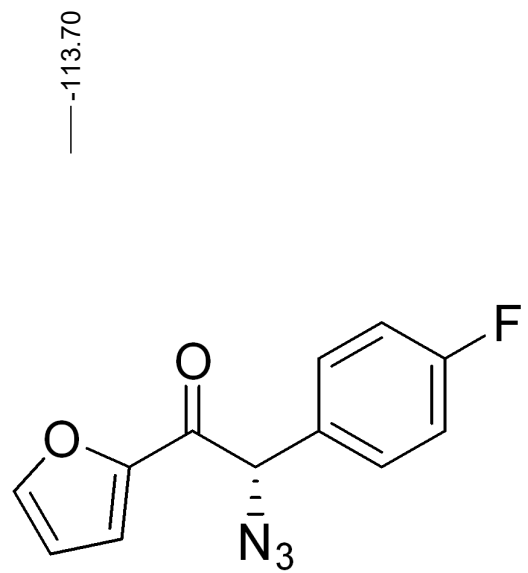

2p

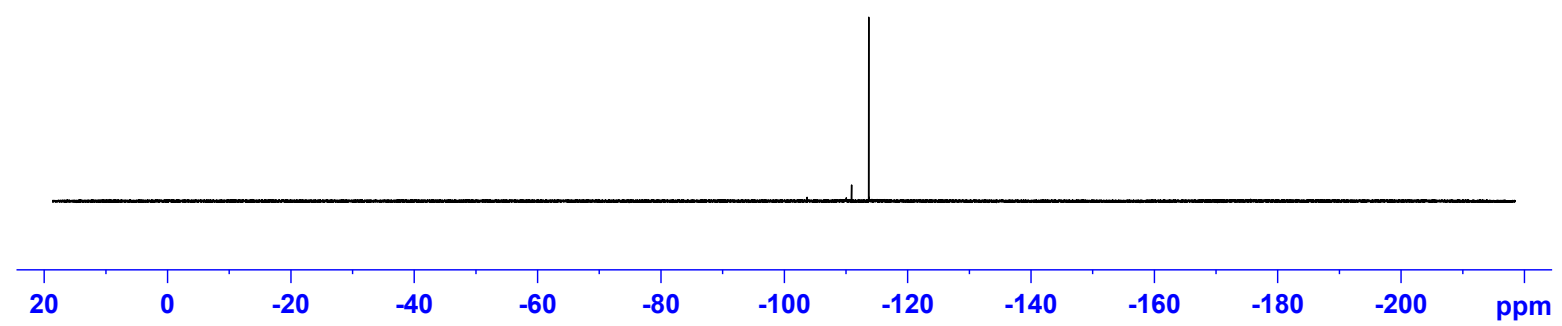

S-230

8.00  
7.96  
7.95  
7.94  
7.93  
7.92  
7.91  
7.65  
7.65  
7.63  
7.63  
7.58  
7.56  
7.55  
7.54  
7.54  
7.53  
7.52  
7.47  
7.45  
7.44  
6.42

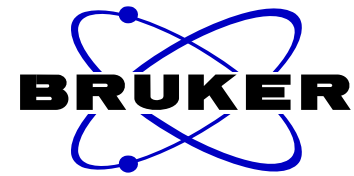

NAME HNMR-gwg-2-70  
 EXPNO 3  
 PROCNO 1  
 Date\_ 20210609  
 Time 23.52 h  
 INSTRUM Avance  
 PROBHD z116098\_0833 (  
 PULPROG zg30  
 TD 65536  
 SOLVENT Acetone  
 NS 16  
 DS 2  
 SWH 8196.722 Hz  
 FIDRES 0.250144 Hz  
 AQ 3.9977460 sec  
 RG 79.9233  
 DW 61.000 usec  
 DE 13.54 usec  
 TE 294.7 K  
 D1 1.00000000 sec  
 TD0 1  
 SFO1 400.1324708 MHz  
 NUC1 1H  
 P0 3.33 usec  
 P1 10.00 usec  
 SI 65536  
 SF 400.1300000 MHz  
 WDW EM  
 SSB 0  
 LB 0.30 Hz  
 GB 0  
 PC 1.00

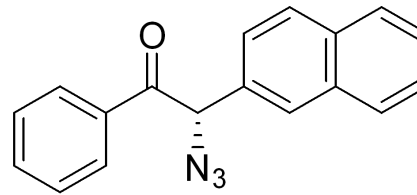

2q

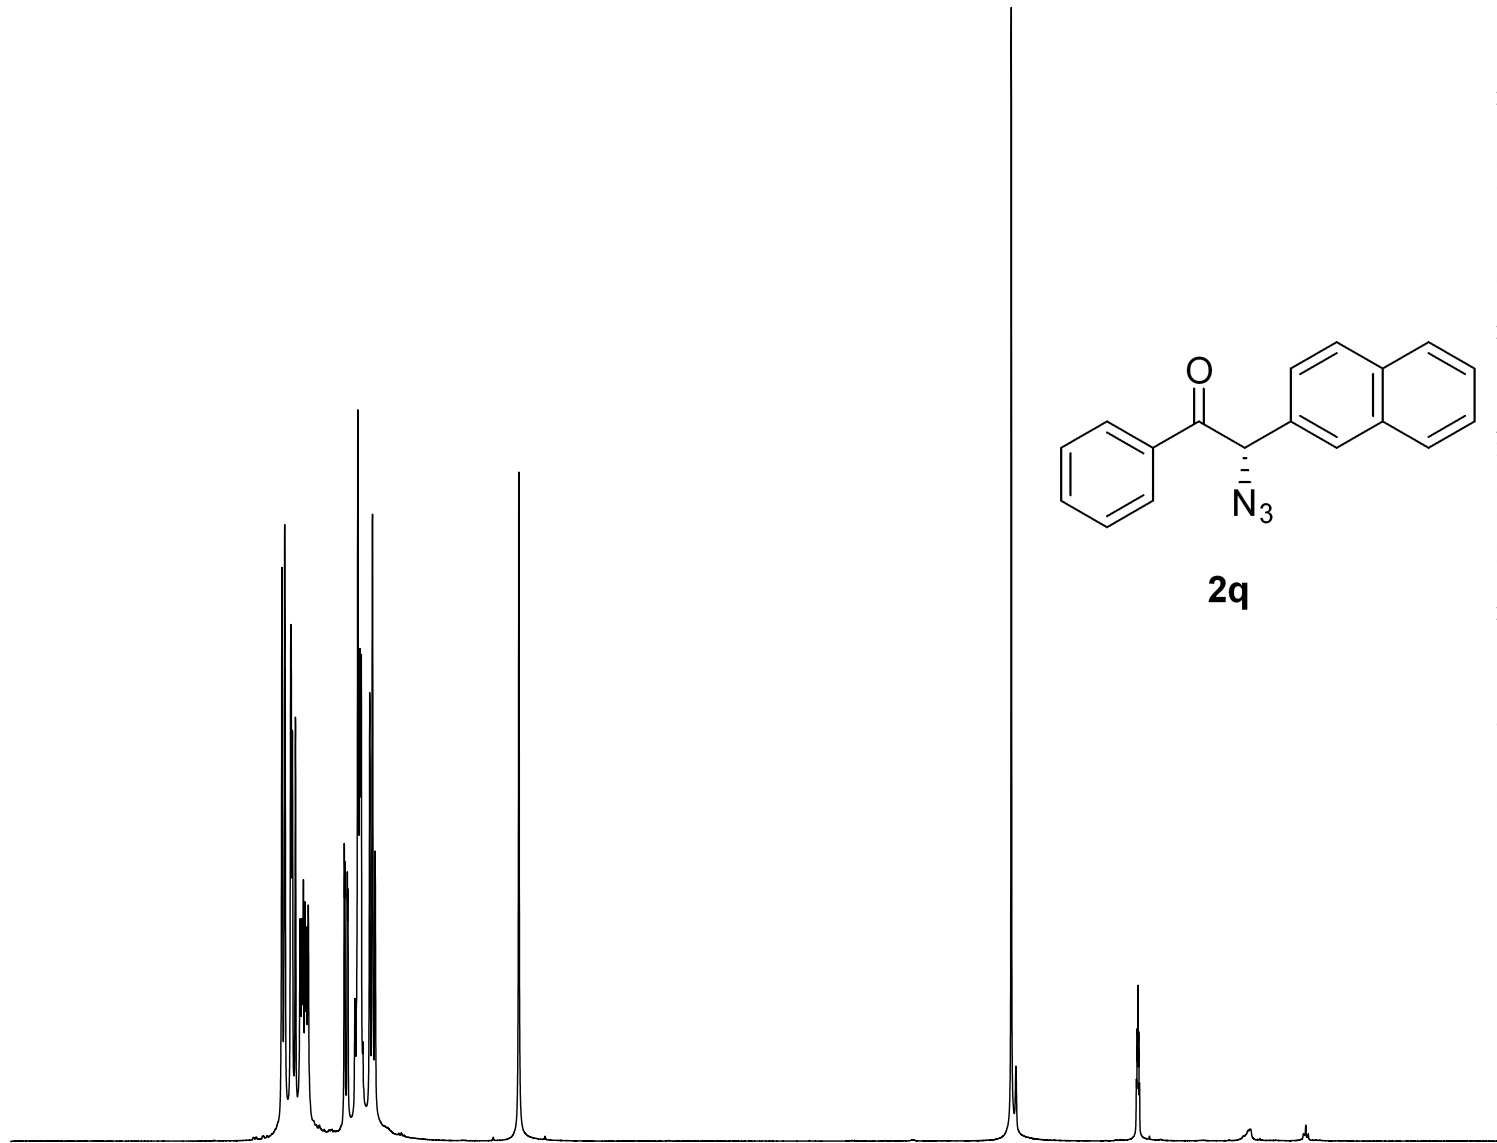

1.98  
2.03  
2.16  
1.04  
2.98  
2.09  
1.00

S-231

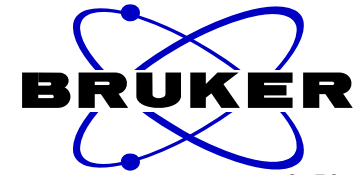

NAME CNMR-gwg-2-70  
EXPNO 4  
PROCNO 1  
Date\_ 20210610  
Time 0.04 h  
INSTRUM Avance  
PROBHD z116098\_0833 (  
PULPROG zgpg30  
TD 65536  
SOLVENT Acetone  
NS 200  
DS 4  
SWH 23809.523 Hz  
FIDRES 0.726609 Hz  
AQ 1.3763061 sec  
RG 48.6724  
DW 21.000 usec  
DE 6.50 usec  
TE 295.1 K  
D1 2.00000000 sec  
D11 0.03000000 sec  
TD0 1  
SFO1 100.6228298 MHz  
NUC1 13C  
P0 3.33 usec  
P1 10.00 usec  
SI 32768  
SF 100.6127685 MHz  
WDW EM  
SSB 0  
LB 1.00 Hz  
GB 0  
PC 1.40

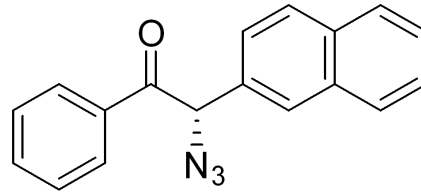

2q

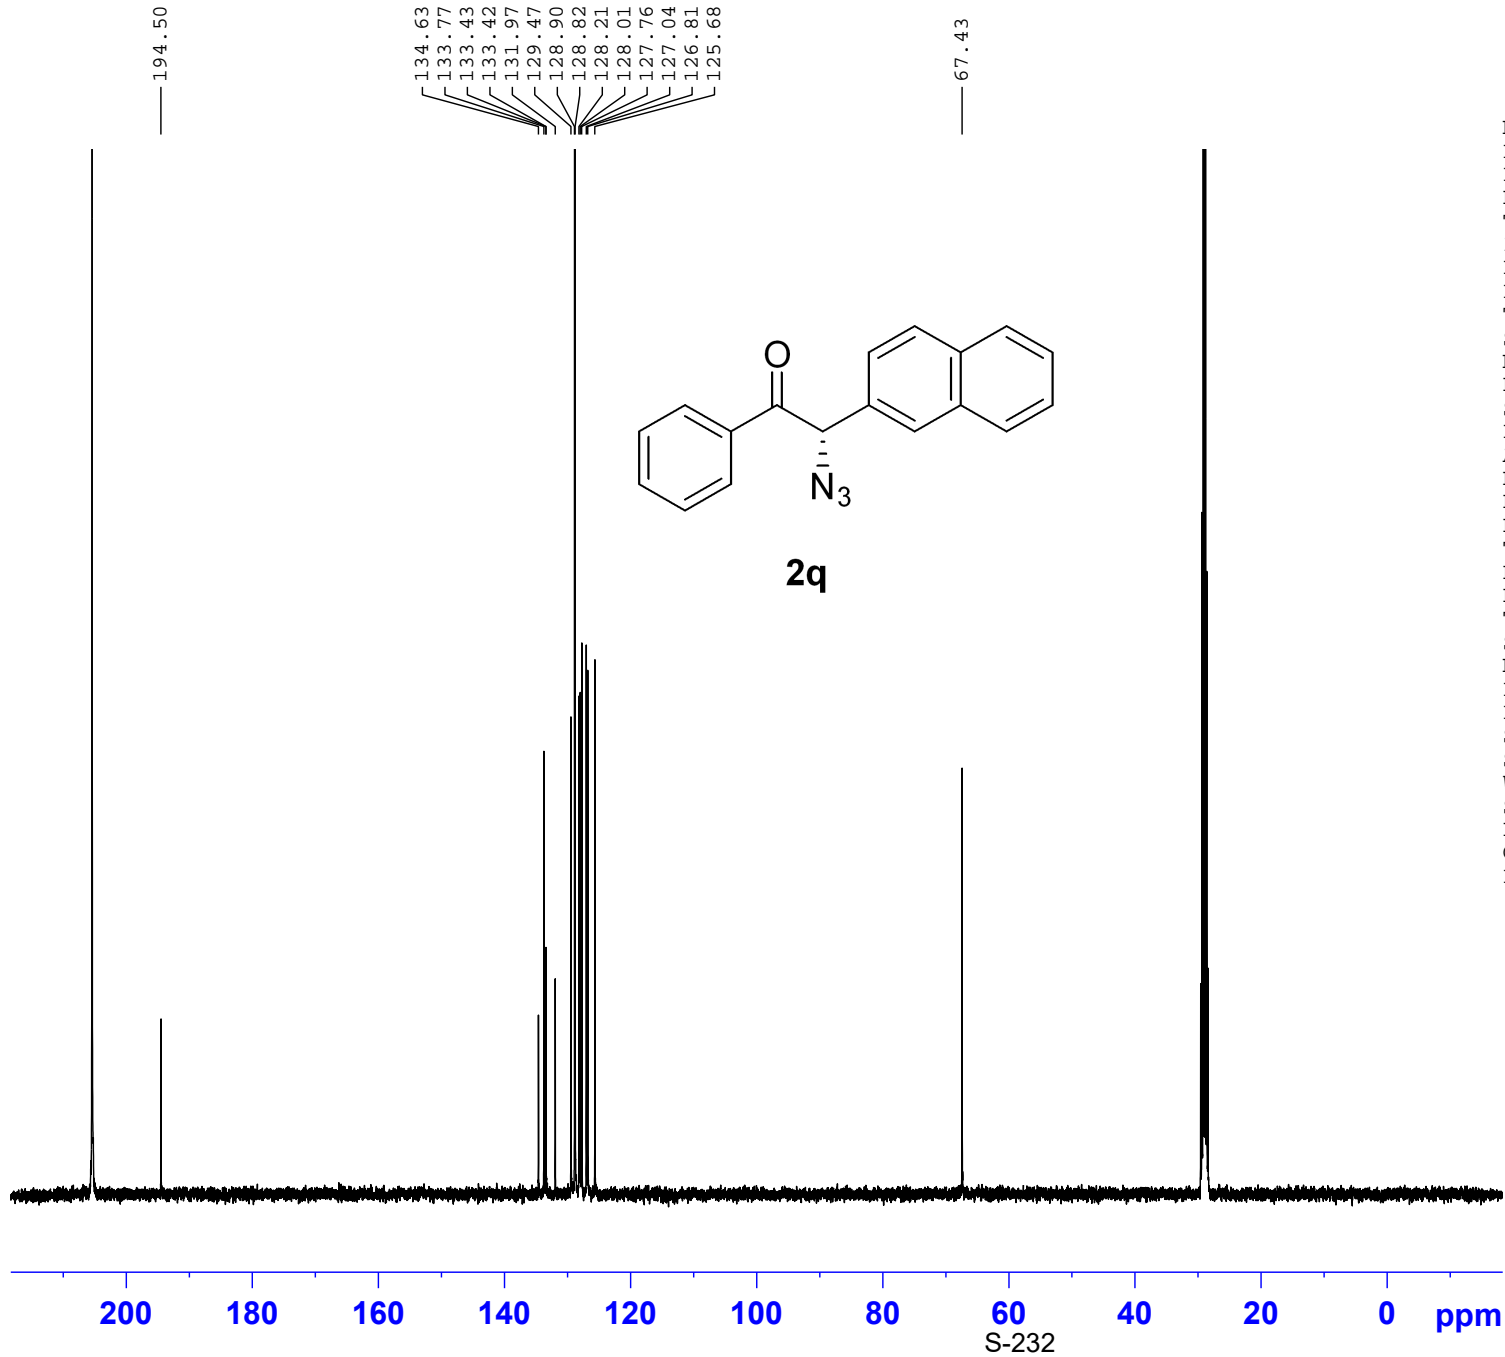



7.50  
7.48  
7.48  
7.48  
7.47  
7.47  
7.46  
7.45  
7.44  
7.44  
7.42  
7.42  
7.42  
7.41  
7.40  
7.39  
7.39  
7.39  
7.39  
7.26  
7.26  
7.25  
7.24  
7.24  
7.22  
7.22  
7.21  
6.21

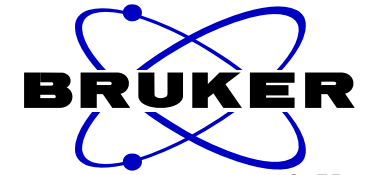

NAME HNMR-gwg-3-75  
EXPNO 1  
PROCNO 1  
Date\_ 20210719  
Time 23.32 h  
INSTRUM Avance  
PROBHD z116098\_0833 (  
PULPROG zg30  
TD 65536  
SOLVENT Acetone  
NS 16  
DS 2  
SWH 8196.722 Hz  
FIDRES 0.250144 Hz  
AQ 3.9977460 sec  
RG 101  
DW 61.000 usec  
DE 13.54 usec  
TE 294.9 K  
D1 1.00000000 sec  
TD0 1  
SFO1 400.1324708 MHz  
NUC1 1H  
P0 3.33 usec  
P1 10.00 usec  
SI 65536  
SF 400.1300044 MHz  
WDW EM  
SSB 0  
LB 0.30 Hz  
GB 0  
PC 1.00

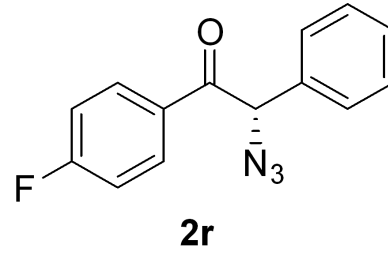

9 8 7 6 5 4 3 2 1 ppm

2.05  
5.00  
2.03  
1.03

S-233



NAME CNMR-gwg-3-75  
EXPNO 2  
PROCNO 1  
Date\_ 20210719  
Time 23.45 h  
INSTRUM Avance  
PROBHD z116098\_0833 (  
PULPROG zgpg30  
TD 65536  
SOLVENT Acetone  
NS 200  
DS 4  
SWH 23809.523 Hz  
FIDRES 0.726609 Hz  
AQ 1.3763061 sec  
RG 48.6724  
DW 21.000 usec  
DE 6.50 usec  
TE 295.5 K  
D1 2.00000000 sec  
D11 0.03000000 sec  
TD0 1  
SFO1 100.6228298 MHz  
NUC1 13C  
P0 3.33 usec  
P1 10.00 usec  
SI 32768  
SF 100.6127685 MHz  
WDW EM  
SSB 0  
LB 1.00 Hz  
GB 0  
PC 1.40

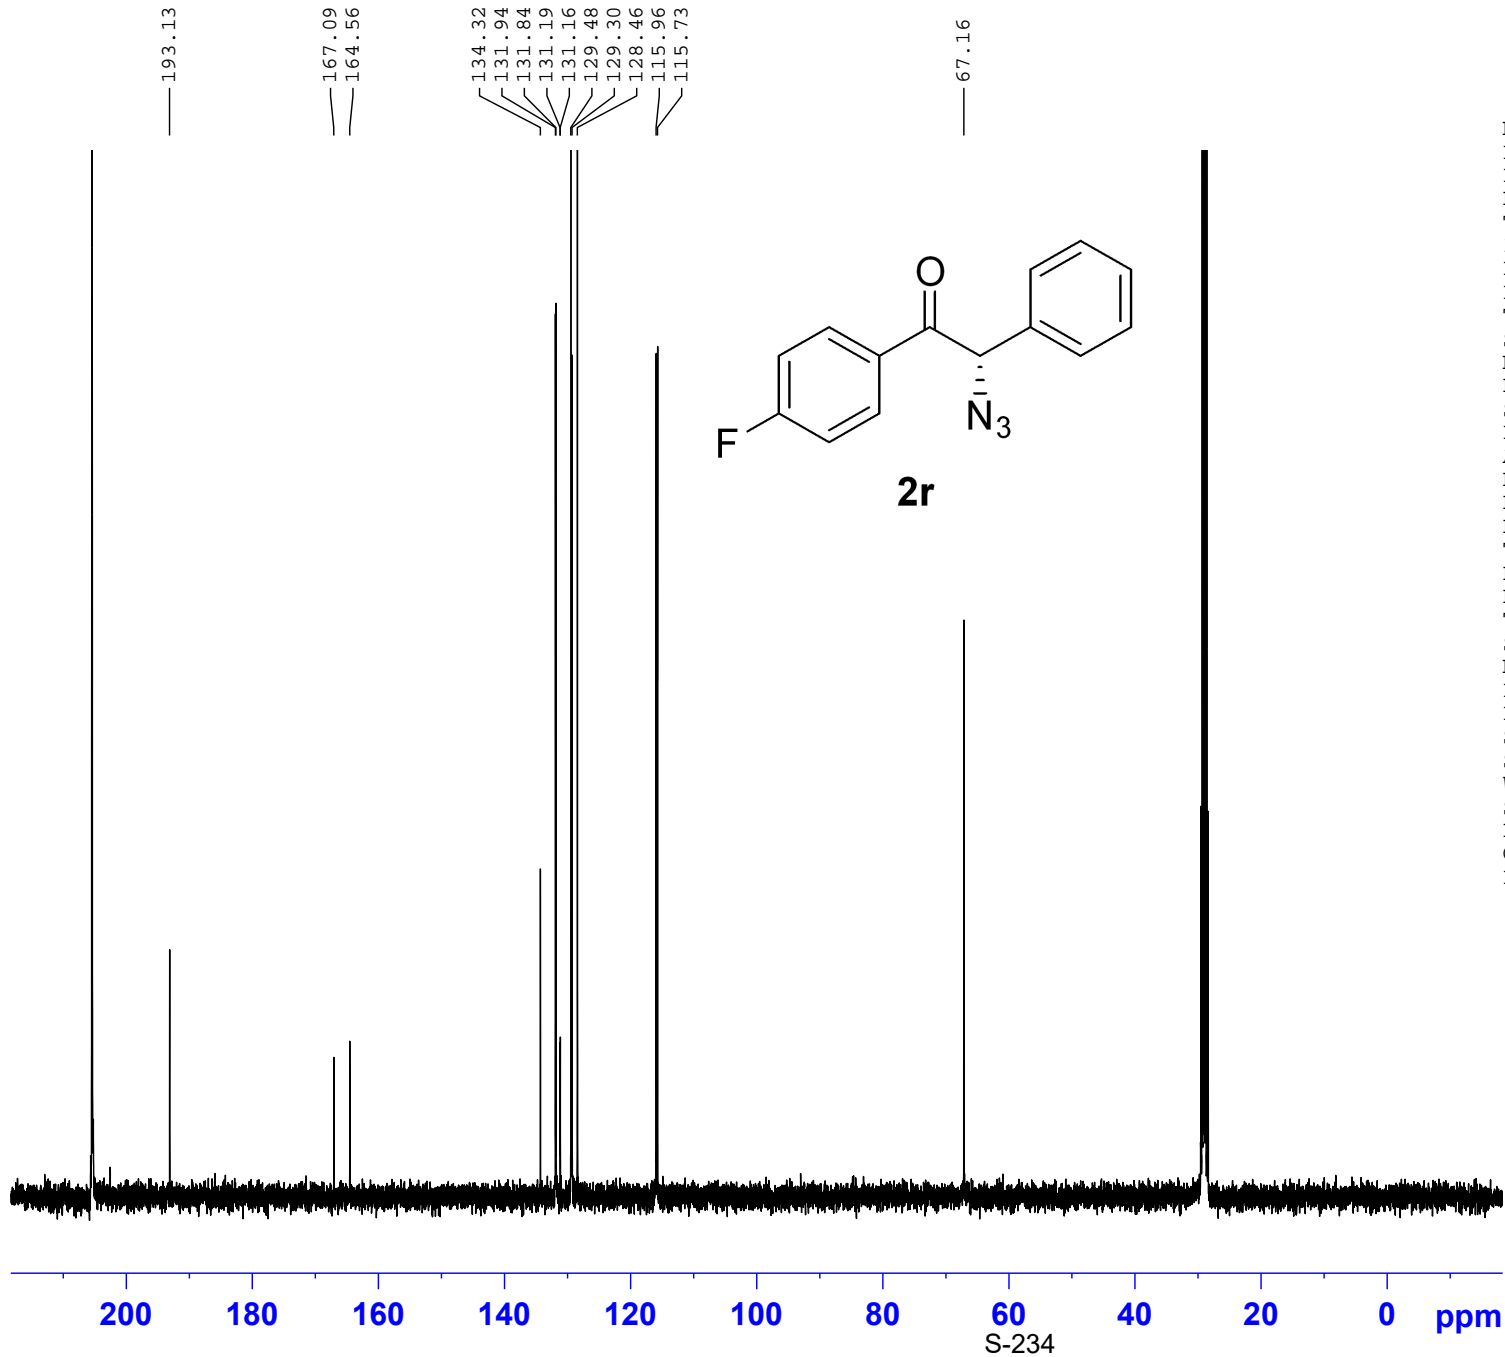



NAME FNMN-gwg-3-75  
EXPNO 3  
PROCNO 1  
Date\_ 20210719  
Time 23.47 h  
INSTRUM Avance  
PROBHD Z116098\_0833 (  
PULPROG zgig  
TD 131072  
SOLVENT Acetone  
NS 16  
DS 4  
SWH 90909.094 Hz  
FIDRES 1.387163 Hz  
AQ 0.7209460 sec  
RG 101  
DW 5.500 usec  
DE 6.50 usec  
TE 295.3 K  
D1 1.00000000 sec  
D11 0.03000000 sec  
TD0 1  
SFO1 376.4607164 MHz  
NUC1 19F  
P1 18.00 usec  
SI 65536  
SF 376.4983662 MHz  
WDW EM  
SSB 0  
LB 0.30 Hz  
GB 0  
PC 1.00

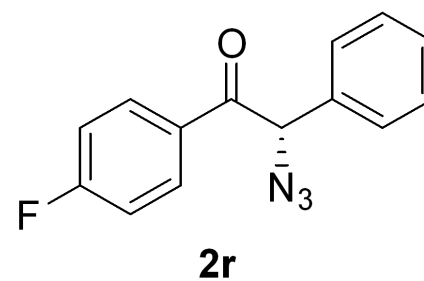

— -105.75

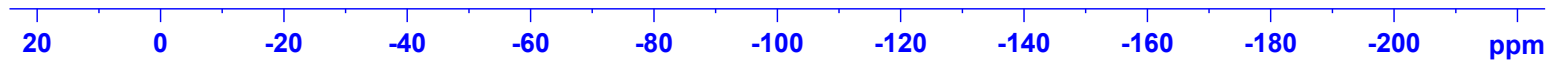

S-235

7.52  
7.51  
7.51  
7.45  
7.44  
7.42  
7.42  
7.41  
7.40  
7.40  
7.39  
7.38  
7.38  
7.35  
7.34  
7.34  
7.33  
7.32  
7.31  
7.30  
7.29  
7.26  
6.34  
6.32  
6.09  
6.07

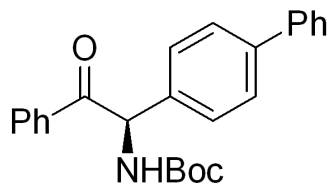

8

—1.45



NAME HNMR-gwg-3-89  
EXPNO 4780  
PROCNO 1  
Date\_ 20210722  
Time 9.37  
INSTRUM spect  
PROBHD 5 mm PABBO BB-  
PULPROG zg30  
TD 65536  
SOLVENT CDCl3  
NS 16  
DS 2  
SWH 6009.615 Hz  
FIDRES 0.091699 Hz  
AQ 5.4526453 sec  
RG 161  
DW 83.200 usec  
DE 6.50 usec  
TE 296.2 K  
D1 1.00000000 sec  
TD0 1

==== CHANNEL f1 =====  
SFO1 300.1318534 MHz  
NUC1 1H  
P1 10.00 usec  
SI 65536  
SF 300.1300072 MHz  
WDW EM  
SSB 0  
LB 0.30 Hz  
GB 0  
PC 1.00

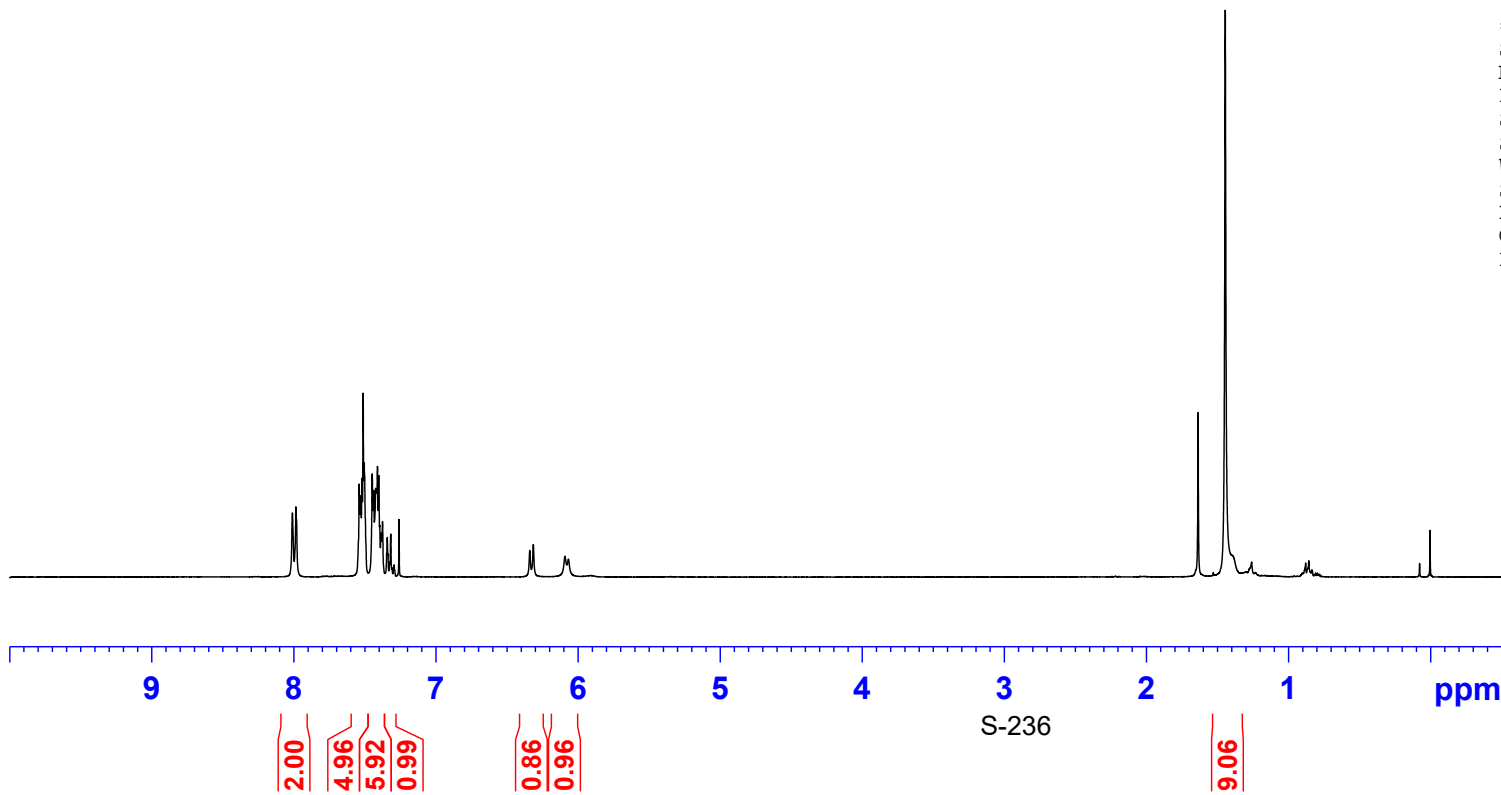

S-236



NAME CNMR-gwg-3-89  
EXPNO 4841  
PROCNO 1  
Date\_ 20210724  
Time 18.28  
INSTRUM spect  
PROBHD 5 mm PABBO BB-  
PULPROG zgpg30  
TD 65536  
SOLVENT CDCl3  
NS 300  
DS 4  
SWH 18028.846 Hz  
FIDRES 0.275098 Hz  
AQ 1.8175818 sec  
RG 203  
DW 27.733 usec  
DE 6.50 usec  
TE 296.2 K  
D1 2.00000000 sec  
D11 0.03000000 sec  
TD0 1

==== CHANNEL f1 =====  
SFO1 75.4752949 MHz  
NUC1 13C  
P1 9.50 usec  
SI 32768  
SF 75.4677485 MHz  
WDW EM  
SSB 0  
LB 1.00 Hz  
GB 0  
PC 1.40

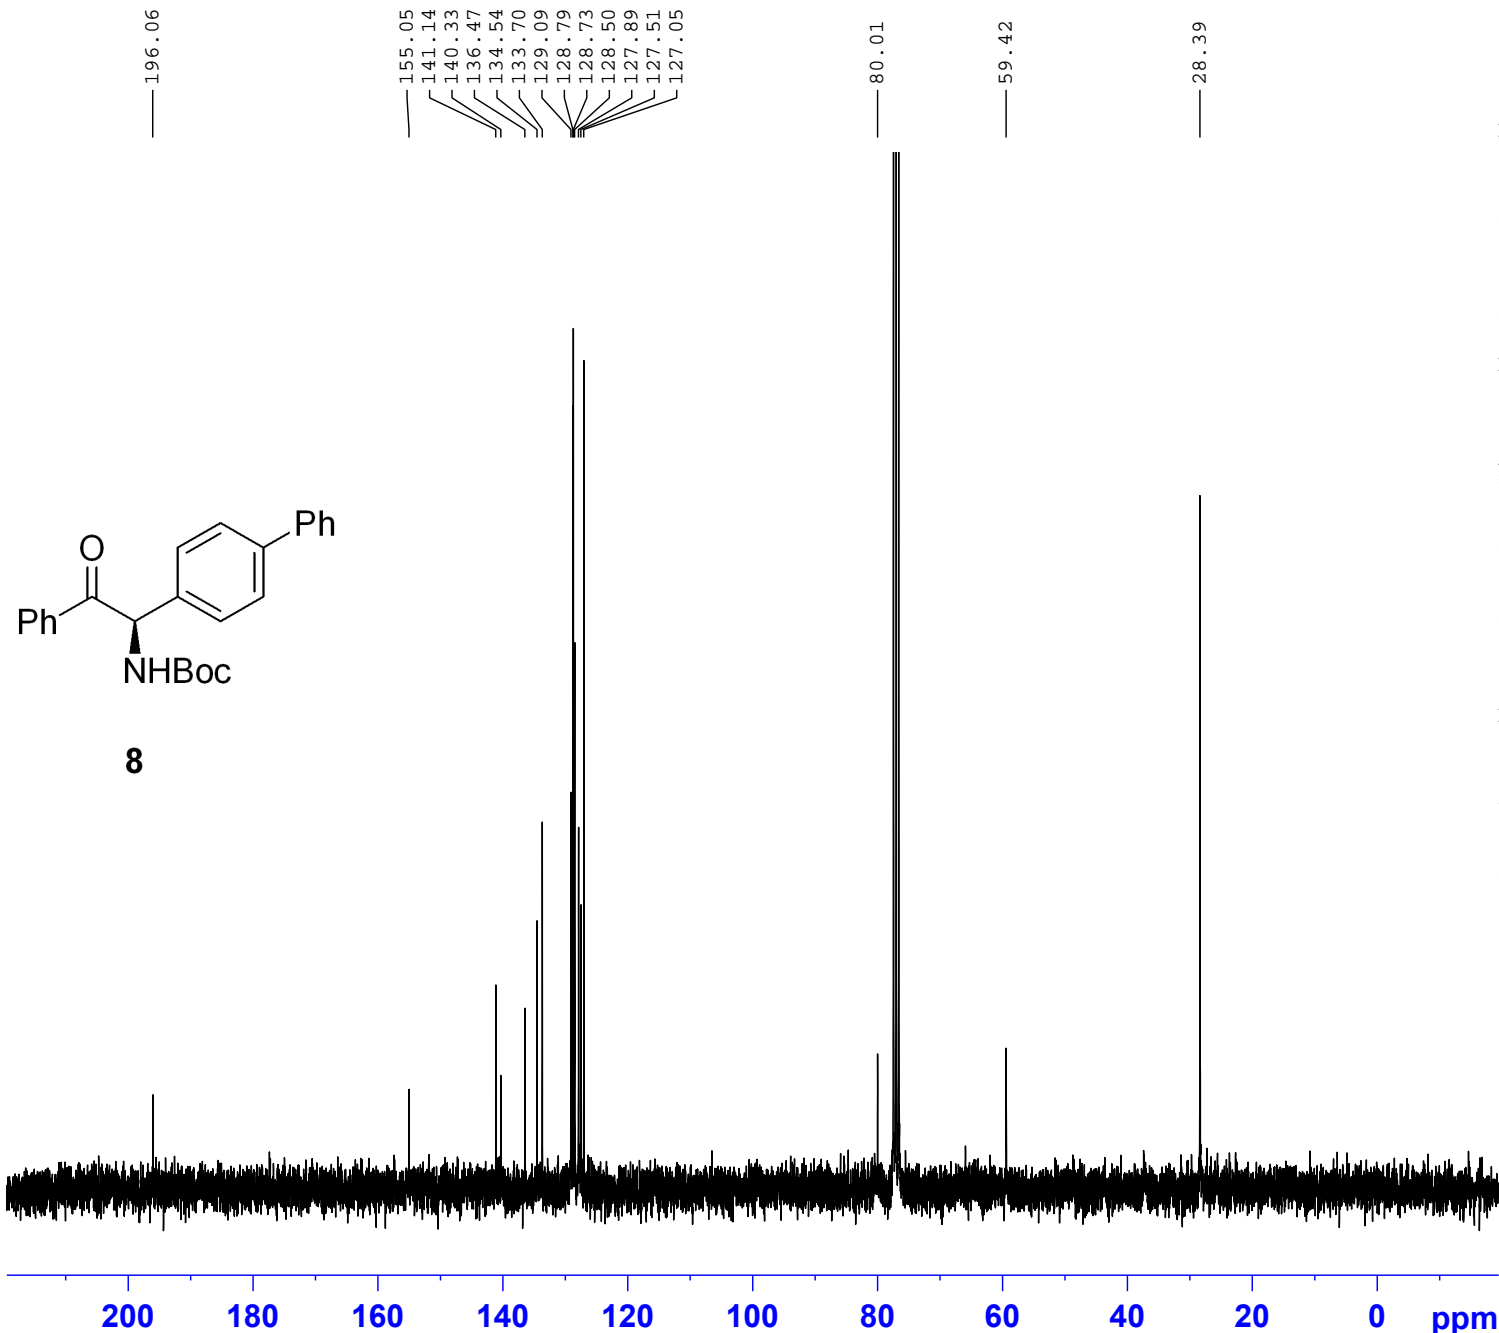

7.484  
7.456  
7.447  
7.441  
7.423  
7.398  
7.358  
7.354  
7.350  
7.337  
7.330  
7.322  
7.310  
7.306  
7.261  
7.254  
7.249  
7.240  
7.228  
7.104  
7.089  
7.081  
5.381  
5.354  
5.069  
5.020

1.407  
1.256



NAME HNMR-gwg-3-155  
EXPNO 5524  
PROCNO 1  
Date\_ 20211014  
Time 9.53  
INSTRUM spect  
PROBHD 5 mm PABBO BB-  
PULPROG zg30  
TD 65536  
SOLVENT CDCl3  
NS 16  
DS 2  
SWH 6009.615 Hz  
FIDRES 0.091699 Hz  
AQ 5.4526453 sec  
RG 161  
DW 83.200 usec  
DE 6.50 usec  
TE -59.1 K  
D1 1.00000000 sec  
TD0 1

==== CHANNEL f1 =====  
SFO1 300.1318534 MHz  
NUC1 1H  
P1 10.00 usec  
SI 65536  
SF 300.1300092 MHz  
WDW EM  
SSB 0  
LB 0.30 Hz  
GB 0  
PC 1.00

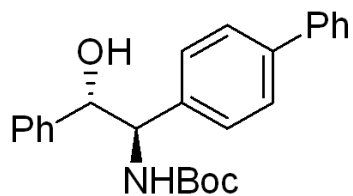

9

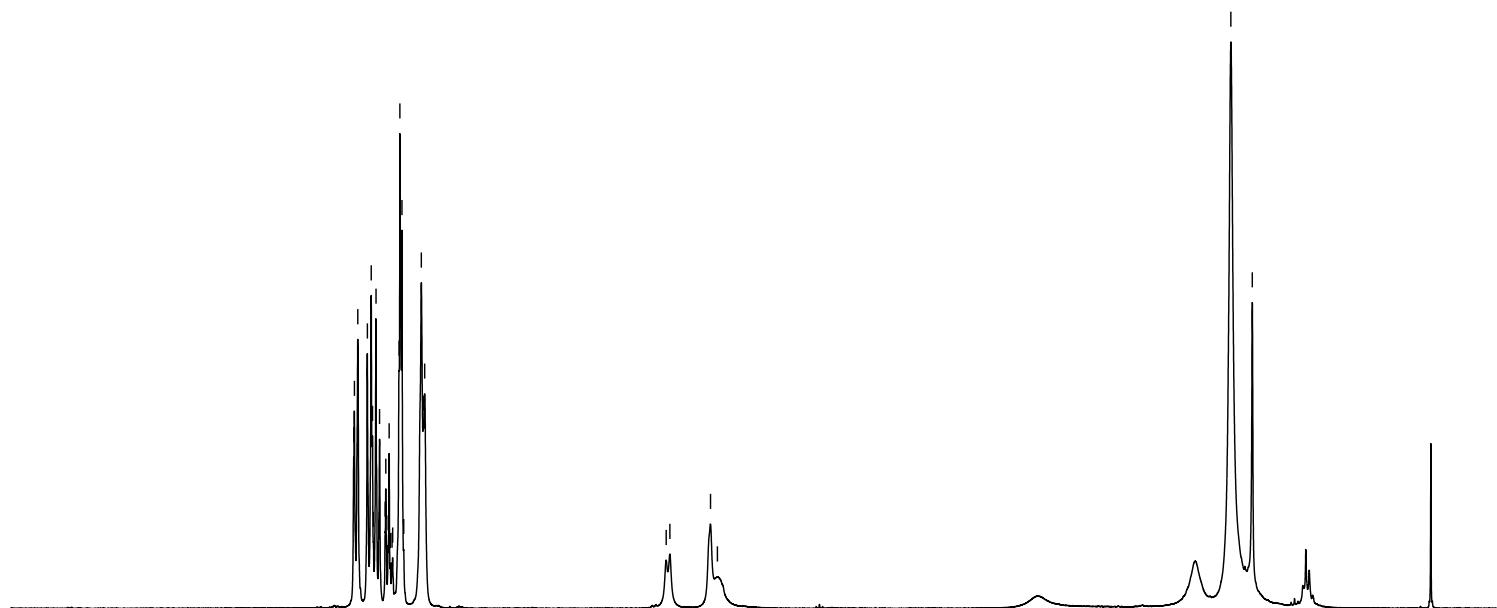

2.07  
3.98  
1.20  
3.37  
3.91

1.00  
1.92

9.15  
1.24

S-238



NAME CNMR-gwg-3-155  
EXPNO 5525  
PROCNO 1  
Date\_ 20211014  
Time 10.27  
INSTRUM spect  
PROBHD 5 mm PABBO BB-  
PULPROG zgpg30  
TD 65536  
SOLVENT CDCl3  
NS 500  
DS 4  
SWH 18028.846 Hz  
FIDRES 0.275098 Hz  
AQ 1.8175818 sec  
RG 203  
DW 27.733 usec  
DE 6.50 usec  
TE -59.1 K  
D1 2.00000000 sec  
D11 0.03000000 sec  
TD0 1

==== CHANNEL f1 =====  
SFO1 75.4752949 MHz  
NUC1 13C  
P1 9.50 usec  
SI 32768  
SF 75.4677485 MHz  
WDW EM  
SSB 0  
LB 1.00 Hz  
GB 0  
PC 1.40

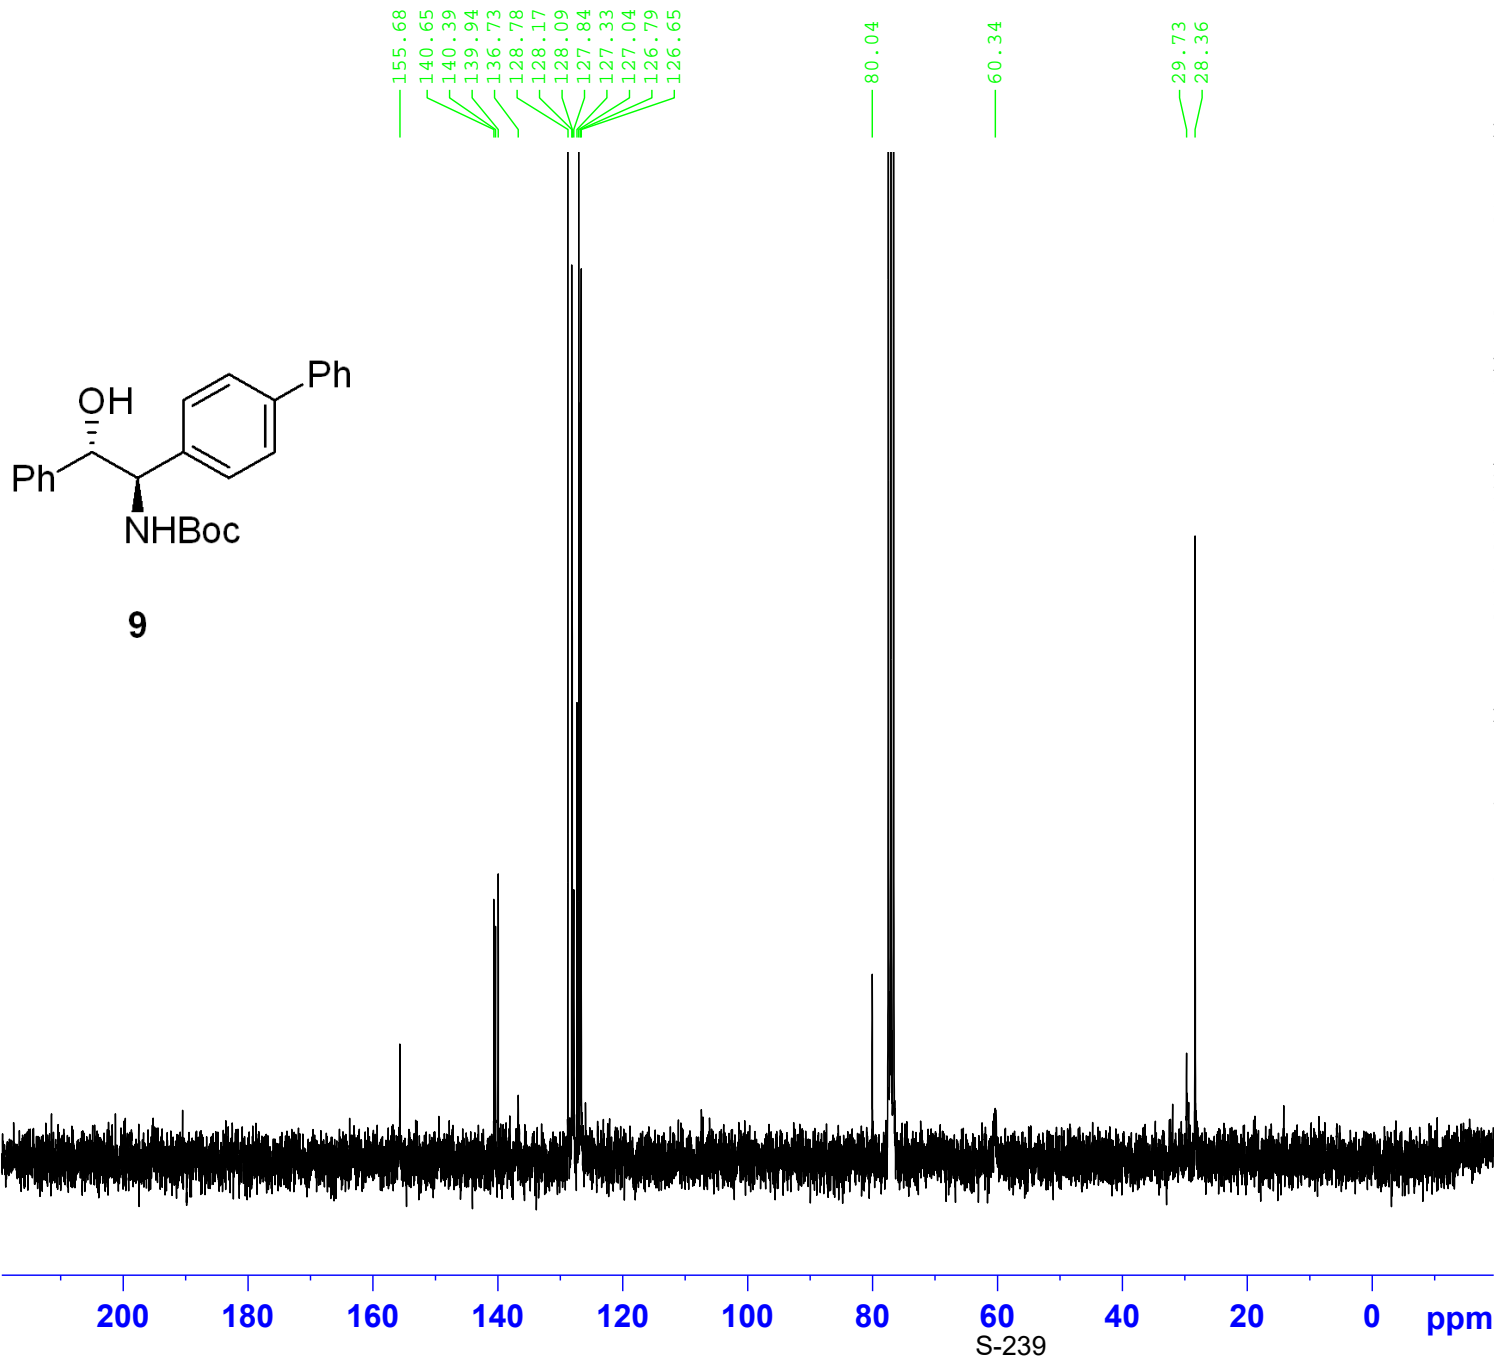

7.60  
7.57  
7.56  
7.55  
7.53  
7.50  
7.47  
7.46  
7.45  
7.45  
7.43  
7.42  
7.42  
7.40  
7.39  
7.38  
7.37  
7.37  
7.36  
7.35  
7.32  
7.31  
7.30  
7.29  
7.27  
7.25

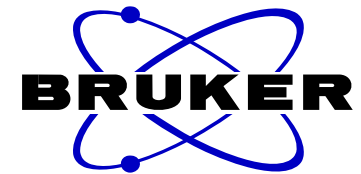

NAME HNMR-gwg-3-92  
EXPNO 4862  
PROCNO 1  
Date\_ 20210727  
Time 11.06  
INSTRUM spect  
PROBHD 5 mm PABBO BB-  
PULPROG zg30  
TD 65536  
SOLVENT CDCl3  
NS 16  
DS 2  
SWH 6009.615 Hz  
FIDRES 0.091699 Hz  
AQ 5.4526453 sec  
RG 161  
DW 83.200 usec  
DE 6.50 usec  
TE 296.1 K  
D1 1.00000000 sec  
TD0 1

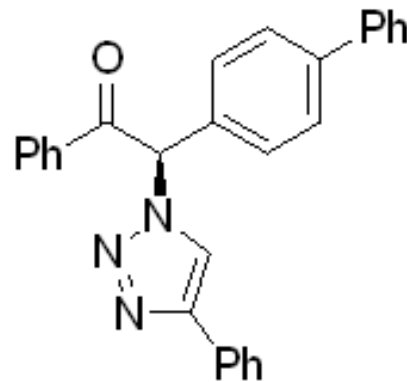

10

==== CHANNEL f1 =====  
SFO1 300.1318534 MHz  
NUC1 1H  
P1 10.00 usec  
SI 65536  
SF 300.1300092 MHz  
WDW EM  
SSB 0  
LB 0.30 Hz  
GB 0  
PC 1.00

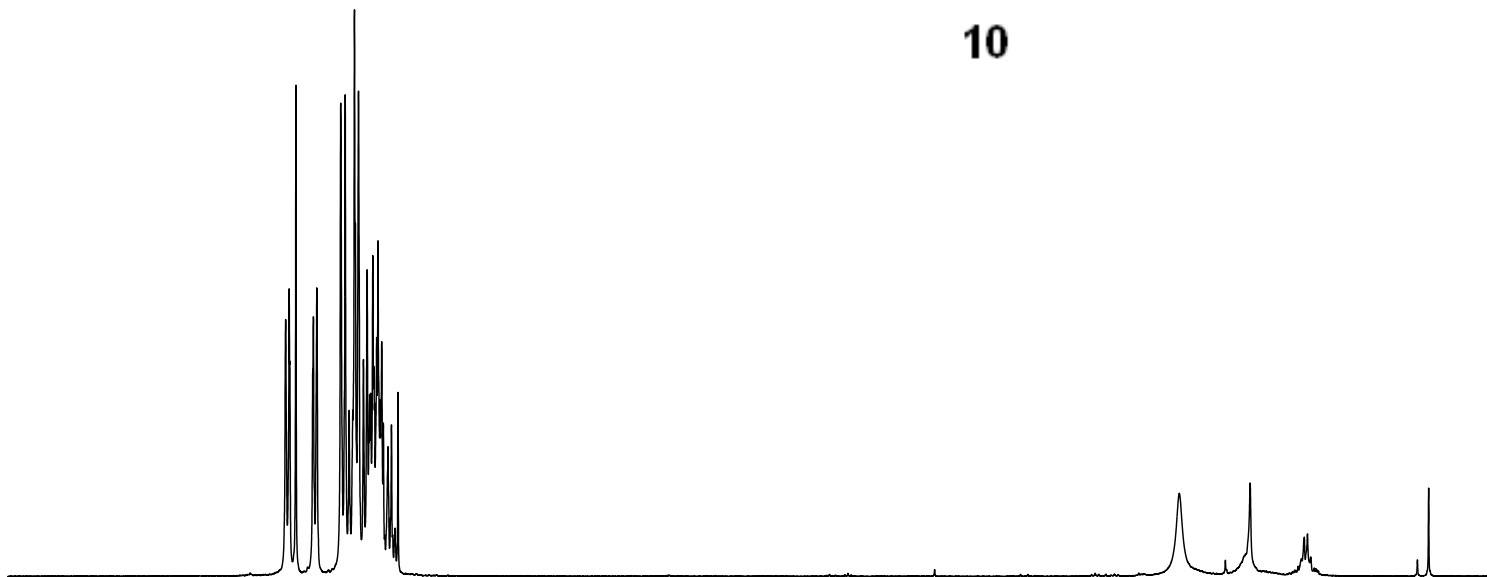

9 8 7 6 5 4 3 2 1 ppm

S-240

2.11  
1.00  
2.03  
3.30  
5.09  
8.55





NAME CNMR-gwg-3-92  
EXPNO 4863  
PROCNO 1  
Date\_ 20210727  
Time 11.27  
INSTRUM spect  
PROBHD 5 mm PABBO BB-  
PULPROG zgpg30  
TD 65536  
SOLVENT CDCl3  
NS 300  
DS 4  
SWH 18028.846 Hz  
FIDRES 0.275098 Hz  
AQ 1.8175818 sec  
RG 203  
DW 27.733 usec  
DE 6.50 usec  
TE 296.1 K  
D1 2.00000000 sec  
D11 0.03000000 sec  
TD0 1

==== CHANNEL f1 =====  
SFO1 75.4752949 MHz  
NUC1 13C  
P1 9.50 usec  
SI 32768  
SF 75.4677485 MHz  
WDW EM  
SSB 0  
LB 1.00 Hz  
GB 0  
PC 1.40

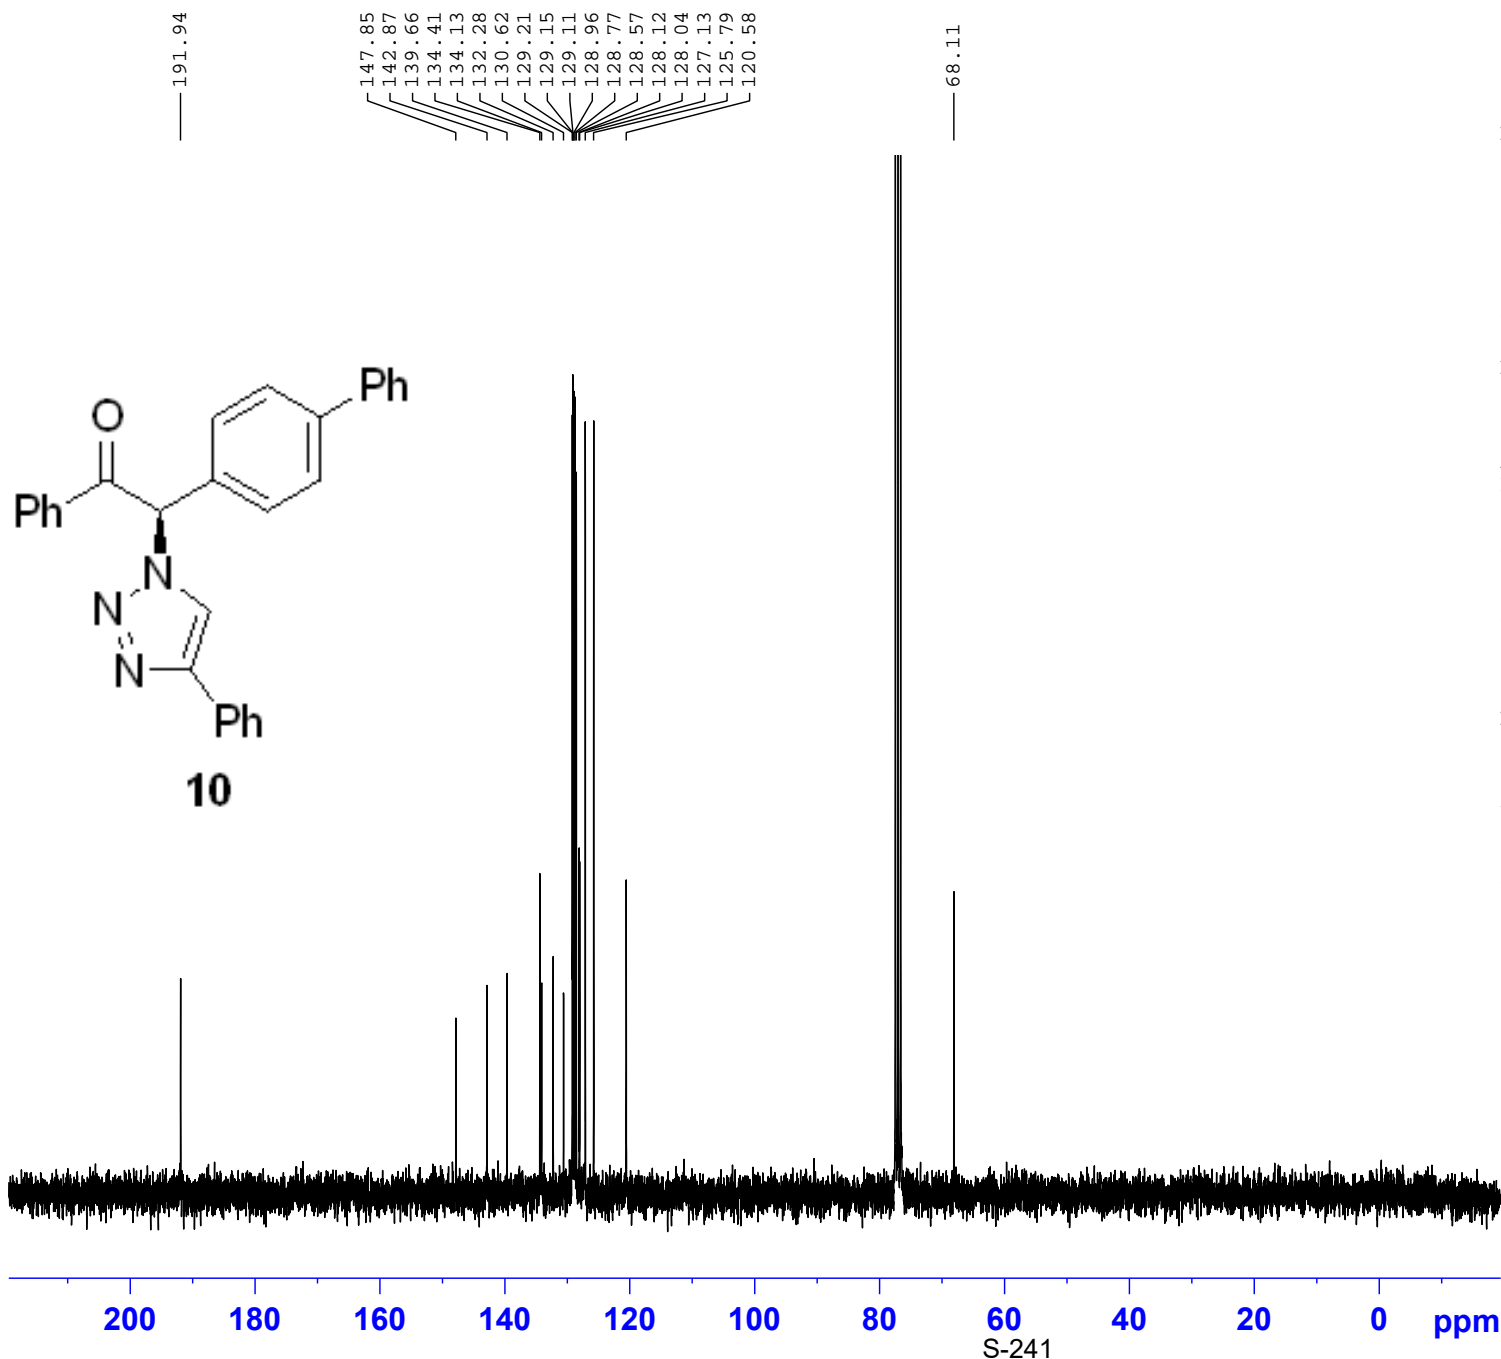



NAME HNMR-gwg-4-144  
EXPNO 1  
PROCNO 1  
Date\_ 20220214  
Time 10.36 h  
INSTRUM Avance  
PROBHD z116098\_0833 (  
PULPROG zg30  
TD 65536  
SOLVENT CDCl3  
NS 16  
DS 2  
SWH 8196.722 Hz  
FIDRES 0.250144 Hz  
AQ 3.9977460 sec  
RG 54.0541  
DW 61.000 usec  
DE 13.54 usec  
TE 293.6 K  
D1 1.00000000 sec  
TD0 1  
SFO1 400.1324708 MHz  
NUC1 1H  
P0 3.33 usec  
P1 10.00 usec  
SI 65536  
SF 400.1300000 MHz  
WDW EM  
SSB 0  
LB 0.30 Hz  
GB 0  
PC 1.00

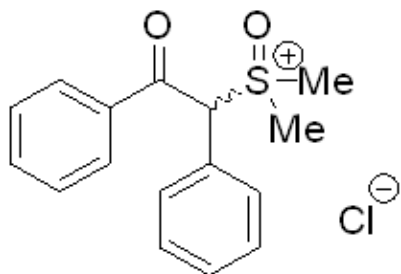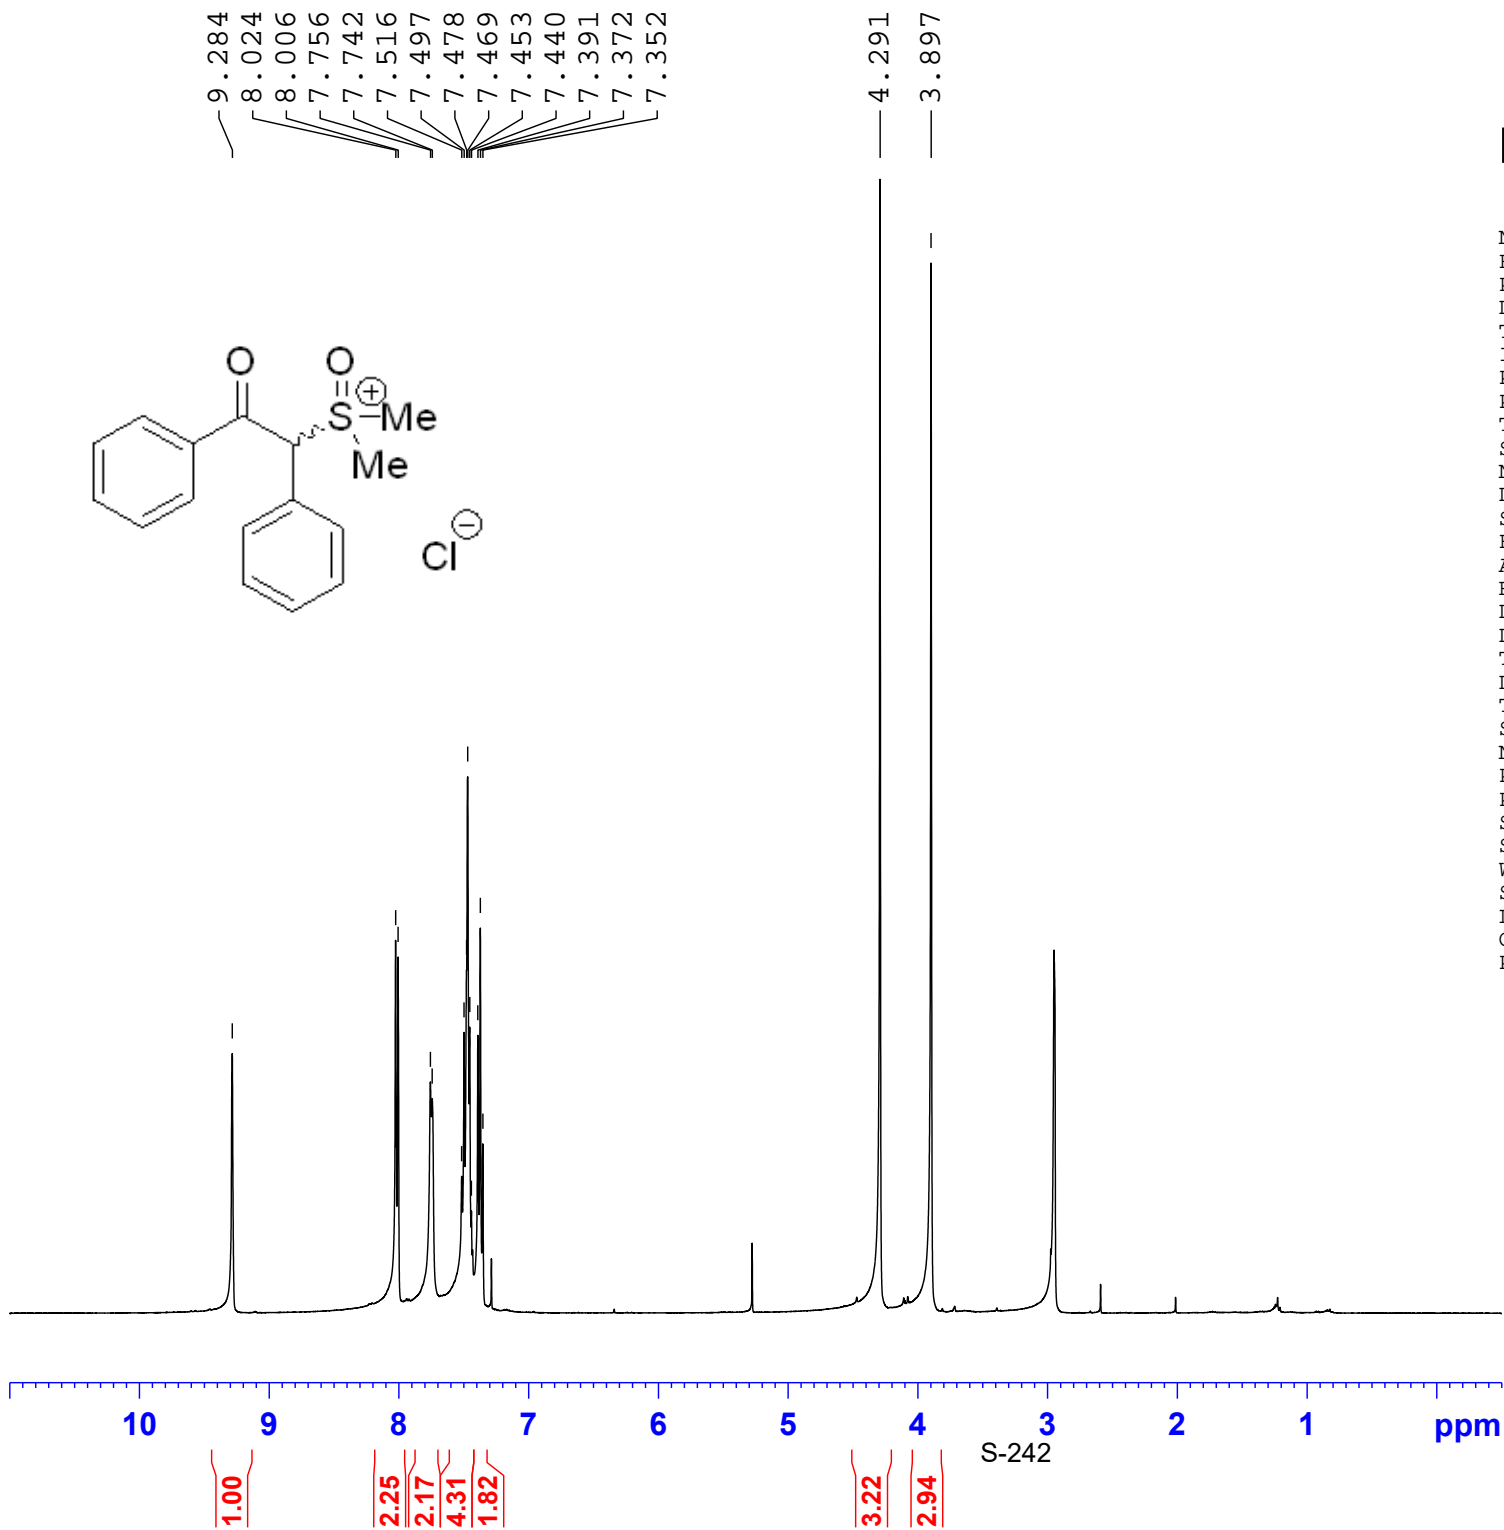



NAME CNMR-gwg-4-144-3  
EXPNO 1  
PROCNO 1  
Date\_ 20220215  
Time 11.07 h  
INSTRUM Avance  
PROBHD z116098\_0833 (  
PULPROG zgpg30  
TD 65536  
SOLVENT CDCl3  
NS 150  
DS 4  
SWH 23809.523 Hz  
FIDRES 0.726609 Hz  
AQ 1.3763061 sec  
RG 51.3764  
DW 21.000 usec  
DE 6.50 usec  
TE 294.7 K  
D1 2.00000000 sec  
D11 0.03000000 sec  
TD0 1  
SFO1 100.6228298 MHz  
NUC1 13C  
P0 3.33 usec  
P1 10.00 usec  
SI 32768  
SF 100.6127685 MHz  
WDW EM  
SSB 0  
LB 1.00 Hz  
GB 0  
PC 1.40

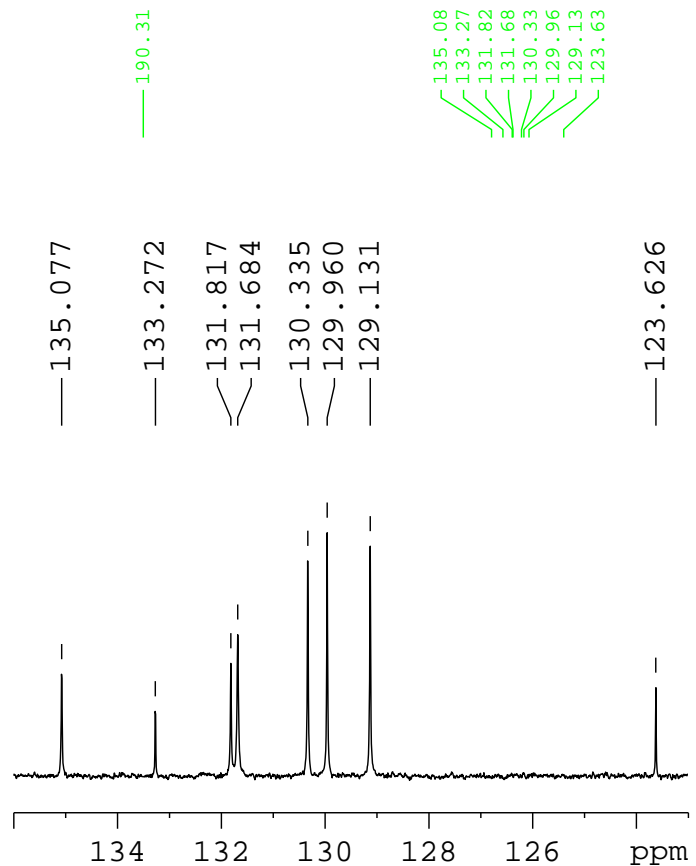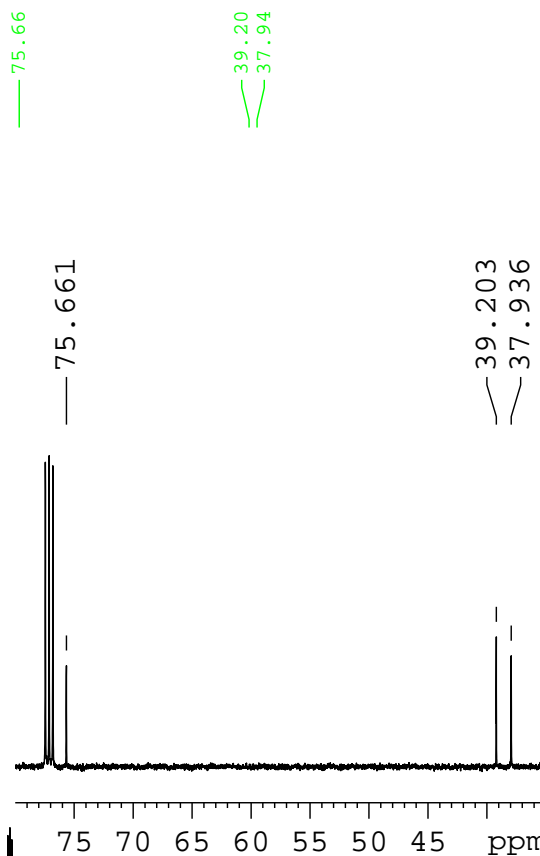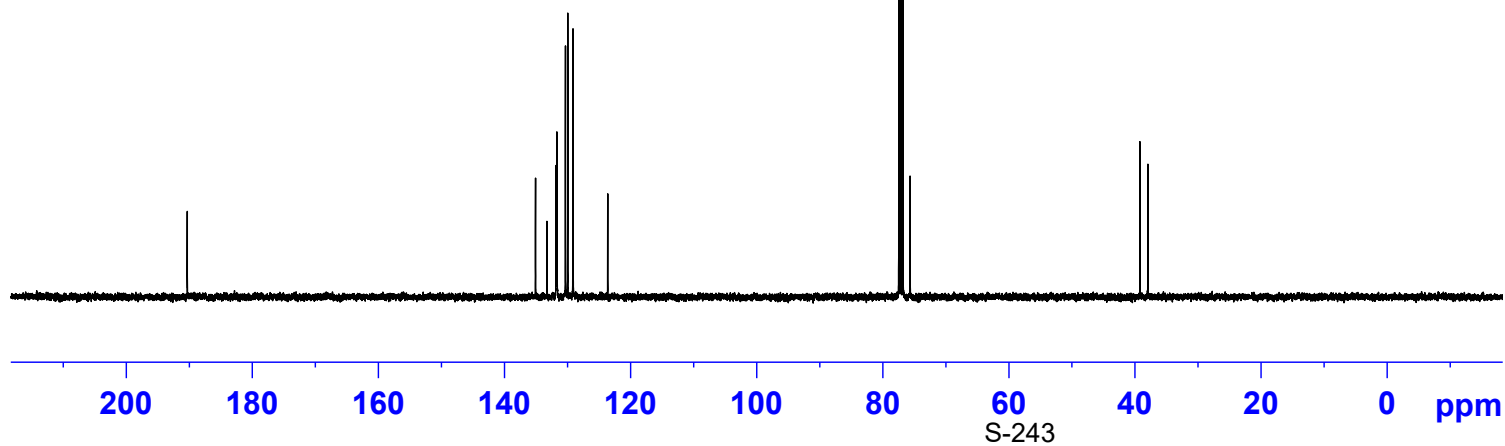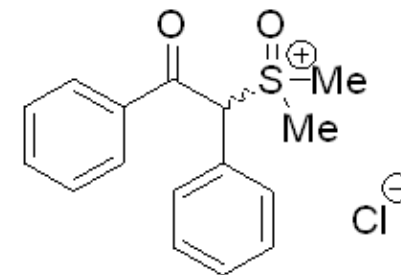

Sample Name: gwg-3-90-racemic

HPLC Condition: OJH, *n*-Hexane/*i*PrOH = 95:5, 1.0 mL/min

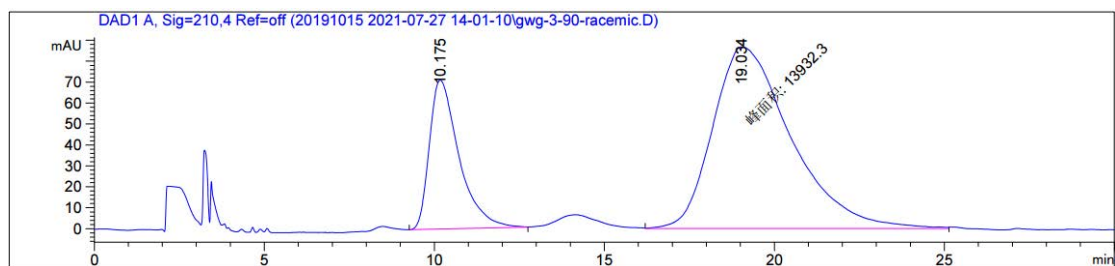

| Peak | RetTime[min] | Type | Width[min] | Area[mAu*s] | Height[mAU] | Area[%] |
|------|--------------|------|------------|-------------|-------------|---------|
| 1    | 10.175       | BB   | 0.9032     | 4301.76611  | 71.16495    | 23.5919 |
| 2    | 19.034       | MM   | 2.6744     | 1.39323e4   | 86.82592    | 76.4081 |

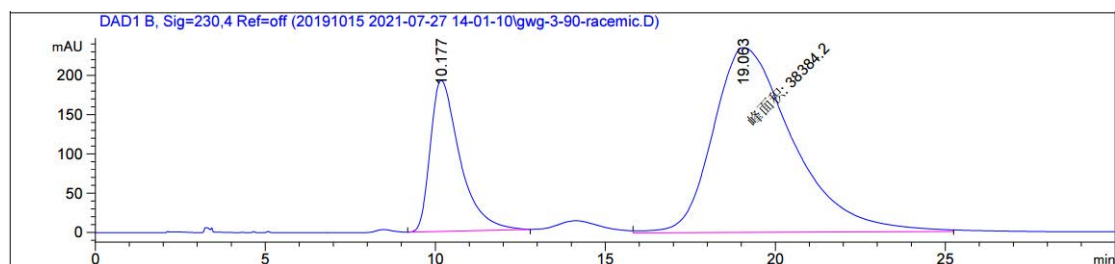

| Peak | RetTime[min] | Type | Width[min] | Area[mAu*s] | Height[mAU] | Area[%] |
|------|--------------|------|------------|-------------|-------------|---------|
| 1    | 10.177       | BB   | 0.9099     | 1.15992e4   | 192.25169   | 23.2062 |
| 2    | 19.063       | MM   | 2.7207     | 3.83842e4   | 235.13536   | 76.7938 |

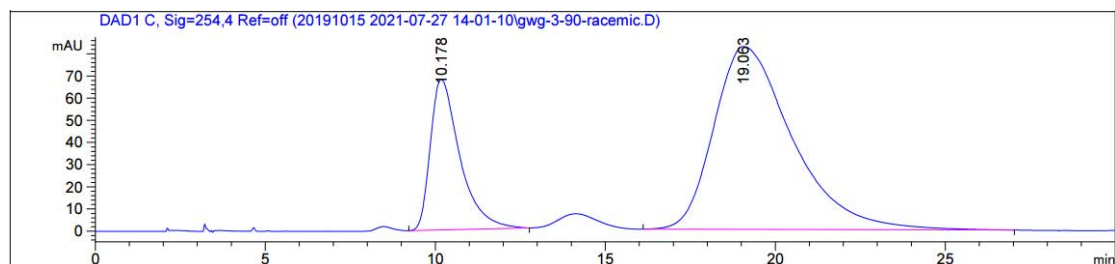

| Peak | RetTime[min] | Type | Width[min] | Area[mAu*s] | Height[mAU] | Area[%] |
|------|--------------|------|------------|-------------|-------------|---------|
| 1    | 10.178       | BB   | 0.9048     | 4092.76416  | 67.93699    | 23.5749 |
| 2    | 19.063       | BB   | 1.9885     | 1.32679e4   | 82.48836    | 76.4251 |

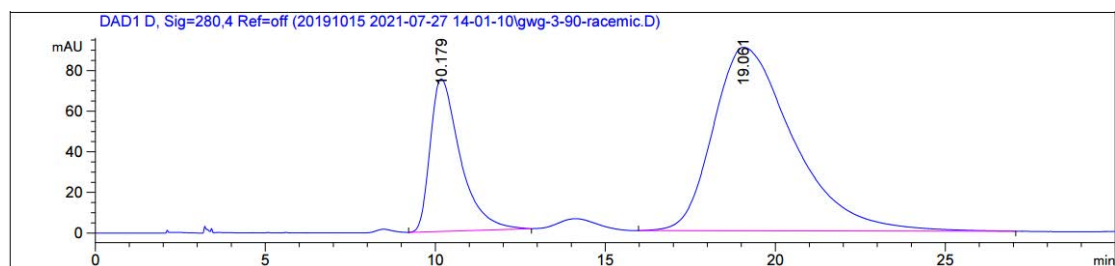

| Peak | RetTime[min] | Type | Width[min] | Area[mAu*s] | Height[mAU] | Area[%] |
|------|--------------|------|------------|-------------|-------------|---------|
| 1    | 10.179       | BB   | 0.9084     | 4606.88037  | 75.02094    | 23.7194 |
| 2    | 19.061       | BB   | 2.0542     | 1.48156e4   | 90.30022    | 76.2806 |

End of Report

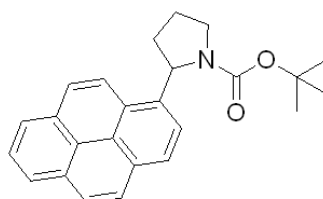

S2

S-244  
mixture of S2 and ent-S2

Sample Name: gwg-3-90 (using (+)-Sparteine as the chiral ligand)

HPLC Condition: OJH, *n*-Hexane/*i*PrOH = 95:5, 1.0 mL/min

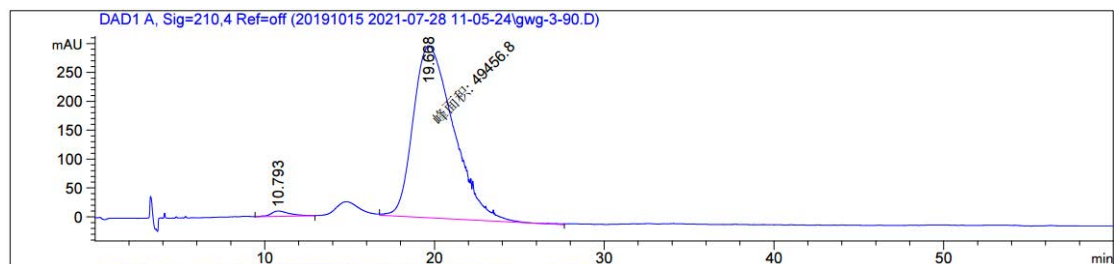

| Peak | RetTime[min] | Type | Width[min] | Area[mAu*s] | Height[mAU] | Area[%] |
|------|--------------|------|------------|-------------|-------------|---------|
| 1    | 10.793       | BB   | 0.8999     | 684.00684   | 9.15239     | 1.3642  |
| 2    | 19.668       | MM   | 2.7659     | 4.94568e4   | 298.02026   | 98.6358 |

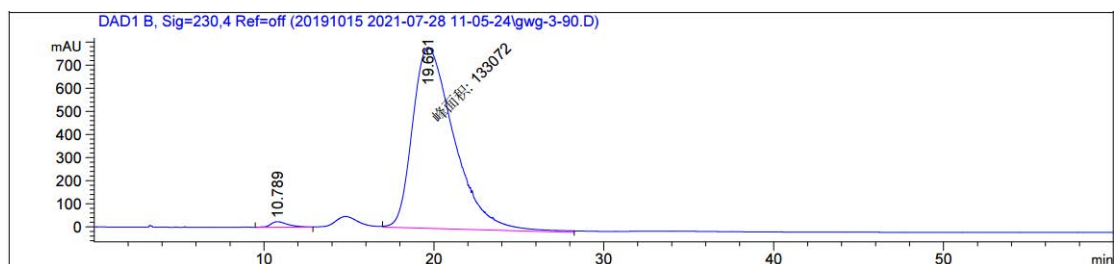

| Peak | RetTime[min] | Type | Width[min] | Area[mAu*s] | Height[mAU] | Area[%] |
|------|--------------|------|------------|-------------|-------------|---------|
| 1    | 10.789       | BB   | 0.9610     | 1642.58740  | 23.92318    | 1.2193  |
| 2    | 19.661       | MM   | 2.8333     | 1.33072e5   | 782.79388   | 98.7807 |

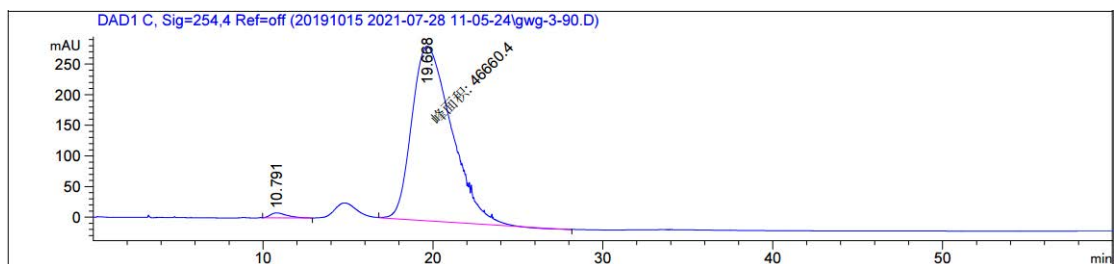

| Peak | RetTime[min] | Type | Width[min] | Area[mAu*s] | Height[mAU] | Area[%] |
|------|--------------|------|------------|-------------|-------------|---------|
| 1    | 10.791       | BB   | 0.8247     | 539.35315   | 8.05997     | 1.1427  |
| 2    | 19.668       | MM   | 2.7263     | 4.66604e4   | 285.24786   | 98.8573 |

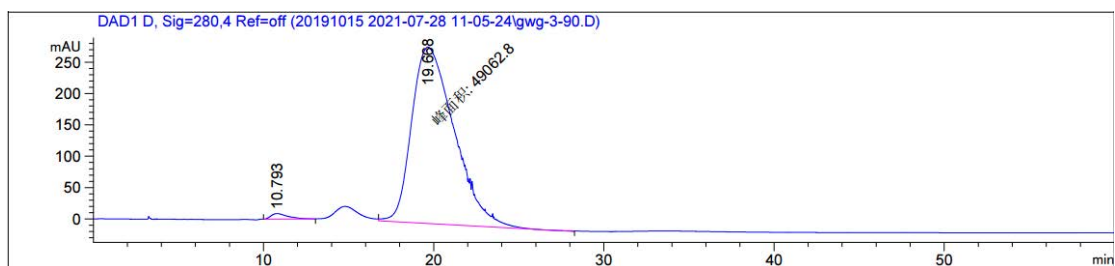

| Peak | RetTime[min] | Type | Width[min] | Area[mAu*s] | Height[mAU] | Area[%] |
|------|--------------|------|------------|-------------|-------------|---------|
| 1    | 10.793       | BB   | 0.8886     | 615.61188   | 8.97056     | 1.2392  |
| 2    | 19.668       | MM   | 2.9064     | 4.90628e4   | 281.34576   | 98.7608 |

End of Report

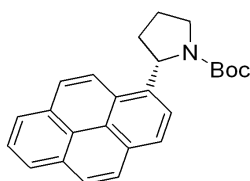

S-245 S2

Sample Name: gwg-3-90-check ee (using (-)-Sparteine as the chiral ligand)

HPLC Condition: OJH, *n*-Hexane/*i*PrOH = 95:5, 1.0 mL/min

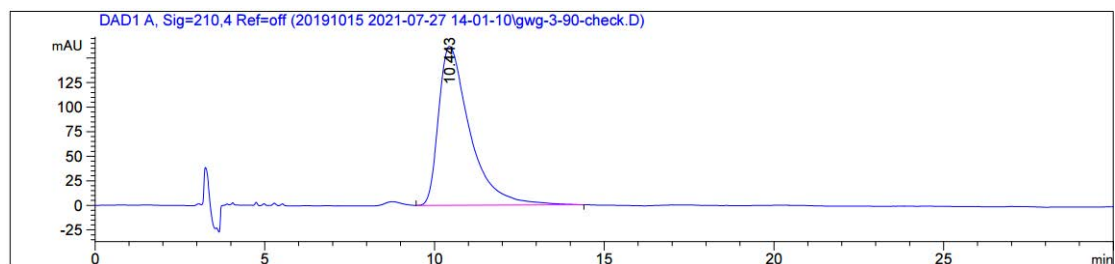

| Peak | RetTime[min] | Type | Width[min] | Area[mAu*s] | Height[mAU] | Area[%]  |
|------|--------------|------|------------|-------------|-------------|----------|
| 1    | 10.443       | BB   | 0.9334     | 1.03471e4   | 161.95375   | 100.0000 |
| 2    | --           | --   | --         | --          | --          | --       |

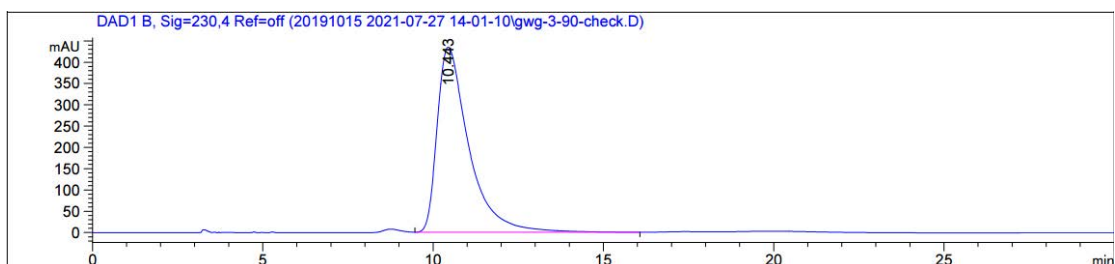

| Peak | RetTime[min] | Type | Width[min] | Area[mAu*s] | Height[mAU] | Area[%]  |
|------|--------------|------|------------|-------------|-------------|----------|
| 1    | 10.443       | BB   | 0.9541     | 2.80896e4   | 434.58441   | 100.0000 |
| 2    | --           | --   | --         | --          | --          | --       |

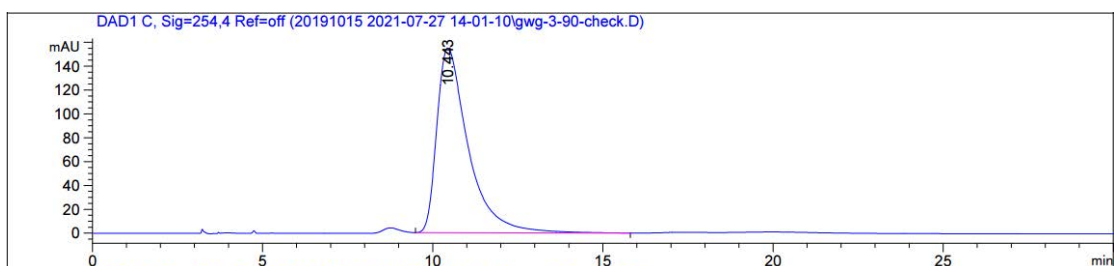

| Peak | RetTime[min] | Type | Width[min] | Area[mAu*s] | Height[mAU] | Area[%]  |
|------|--------------|------|------------|-------------|-------------|----------|
| 1    | 10.443       | BB   | 0.9508     | 9937.71680  | 154.82727   | 100.0000 |
| 2    | --           | --   | --         | --          | --          | --       |

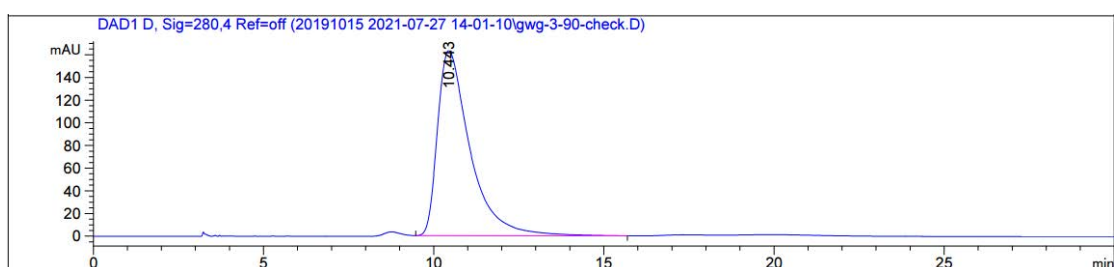

| Peak | RetTime[min] | Type | Width[min] | Area[mAu*s] | Height[mAU] | Area[%]  |
|------|--------------|------|------------|-------------|-------------|----------|
| 1    | 10.443       | BB   | 0.9867     | 1.08583e4   | 163.09874   | 100.0000 |
| 2    | --           | --   | --         | --          | --          | --       |

End of Report

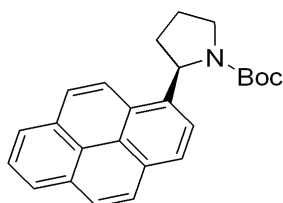

S-246  
ent-S2

for checking ee

Sample Name: gwg-1-41-racemic

HPLC Condition: OD-H, *n*-Hexane:*i*PrOH = 99:1, 0.5 mL/min

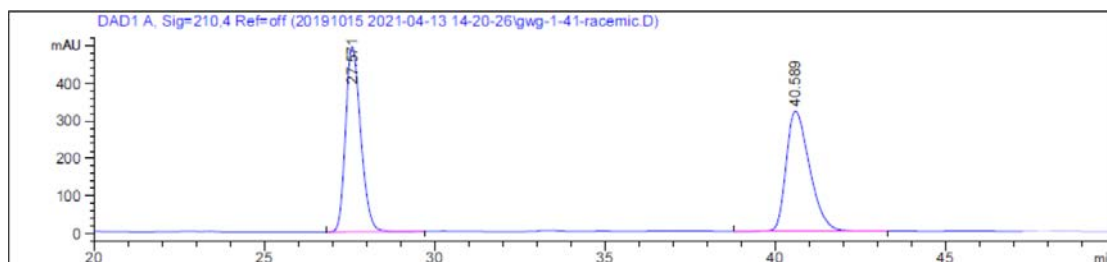

| Peak | RetTime[min] | Type | Width[min] | Area[mAu*s] | Height[mAU] | Area[%] |
|------|--------------|------|------------|-------------|-------------|---------|
| 1    | 27.571       | BB   | 0.4784     | 1.52143e4   | 492.54242   | 49.9347 |
| 2    | 40.589       | BB   | 0.7369     | 1.52540e4   | 319.57141   | 50.0653 |

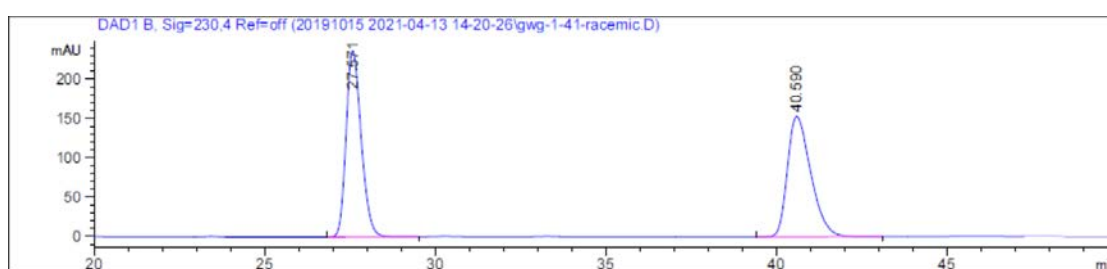

| Peak | RetTime[min] | Type | Width[min] | Area[mAu*s] | Height[mAU] | Area[%] |
|------|--------------|------|------------|-------------|-------------|---------|
| 1    | 27.571       | BB   | 0.4742     | 7267.94043  | 236.74677   | 50.0272 |
| 2    | 40.590       | BB   | 0.7302     | 7260.03076  | 152.83063   | 49.9728 |

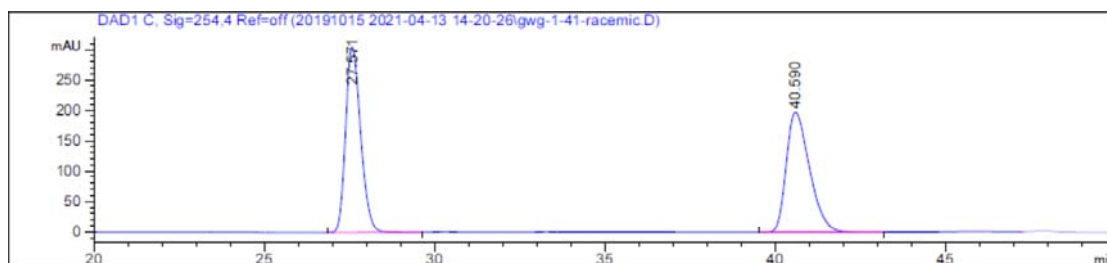

| Peak | RetTime[min] | Type | Width[min] | Area[mAu*s] | Height[mAU] | Area[%] |
|------|--------------|------|------------|-------------|-------------|---------|
| 1    | 27.571       | BB   | 0.4763     | 9382.03418  | 305.44919   | 50.0006 |
| 2    | 40.590       | BB   | 0.7327     | 9381.79102  | 197.32199   | 49.9994 |

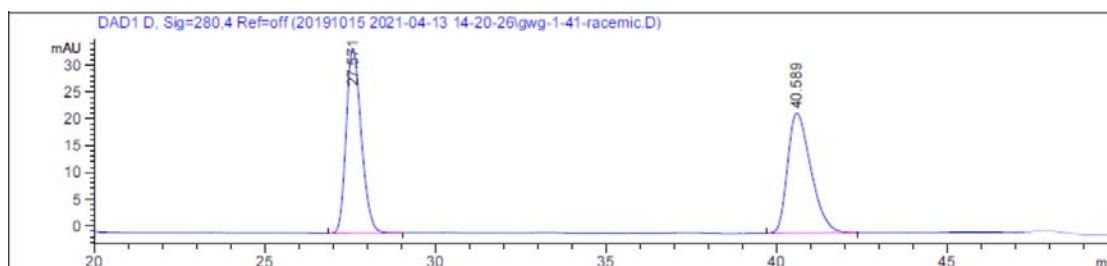

| Peak | RetTime[min] | Type | Width[min] | Area[mAu*s] | Height[mAU] | Area[%] |
|------|--------------|------|------------|-------------|-------------|---------|
| 1    | 27.571       | BB   | 0.4752     | 1062.21313  | 34.50259    | 49.9082 |
| 2    | 40.589       | BB   | 0.7219     | 1066.12280  | 22.37579    | 50.0918 |

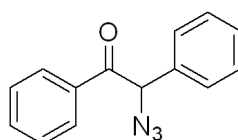

S-247  
racemic

Sample Name: gwg-1-41-enantioenriched

HPLC Condition: OD-H, *n*-Hexane/*i*PrOH = 99:1, 0.5 mL/min

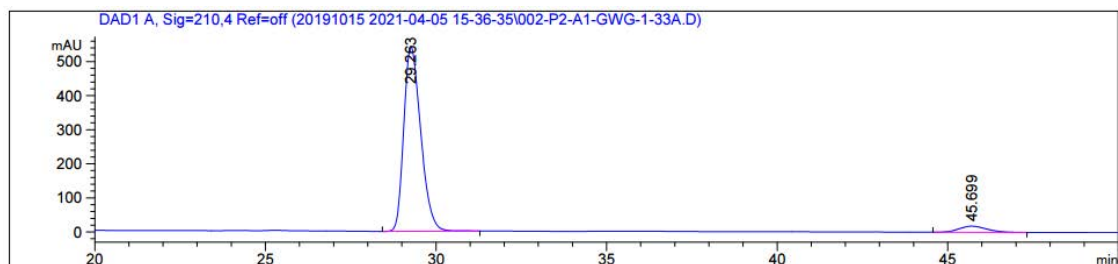

| Peak | RetTime[min] | Type | Width[min] | Area[mAu*s] | Height[mAU] | Area[%] |
|------|--------------|------|------------|-------------|-------------|---------|
| 1    | 29.263       | BB   | 0.5348     | 1.87597e4   | 543.32391   | 94.8477 |
| 2    | 45.699       | BB   | 0.8245     | 1019.06128  | 17.94446    | 5.1523  |

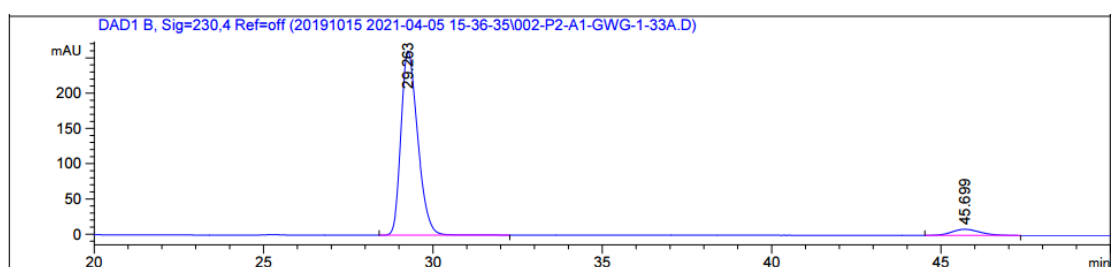

| Peak | RetTime[min] | Type | Width[min] | Area[mAu*s] | Height[mAU] | Area[%] |
|------|--------------|------|------------|-------------|-------------|---------|
| 1    | 29.263       | BB   | 0.5306     | 8972.75391  | 261.28308   | 94.7803 |
| 2    | 45.699       | BB   | 0.8246     | 494.14722   | 8.64814     | 5.2197  |

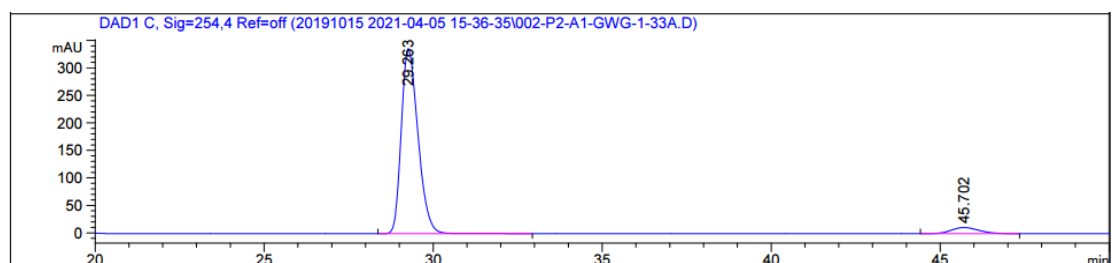

| Peak | RetTime[min] | Type | Width[min] | Area[mAu*s] | Height[mAU] | Area[%] |
|------|--------------|------|------------|-------------|-------------|---------|
| 1    | 29.263       | BB   | 0.5309     | 1.15658e4   | 336.59842   | 94.7581 |
| 2    | 45.702       | BB   | 0.8248     | 639.80573   | 11.16127    | 5.2419  |

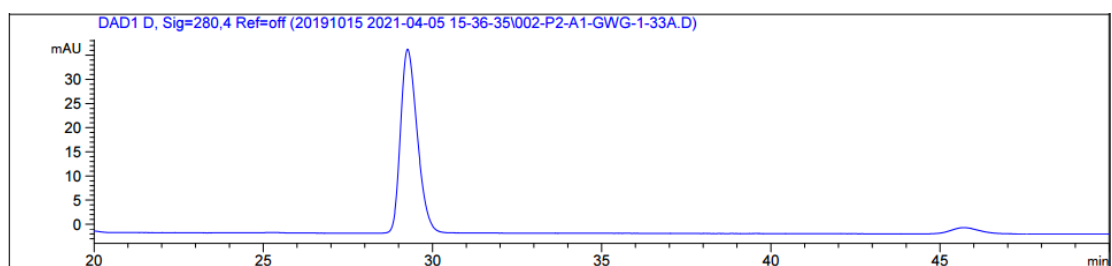

End of report

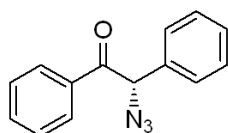

**28-248**  
enantioenriched



Sample Name: gwg-1-47-racemic

HPLC Condition: IC, *n*-Hexane/*i*PrOH = 97/3, 1.0 mL/min

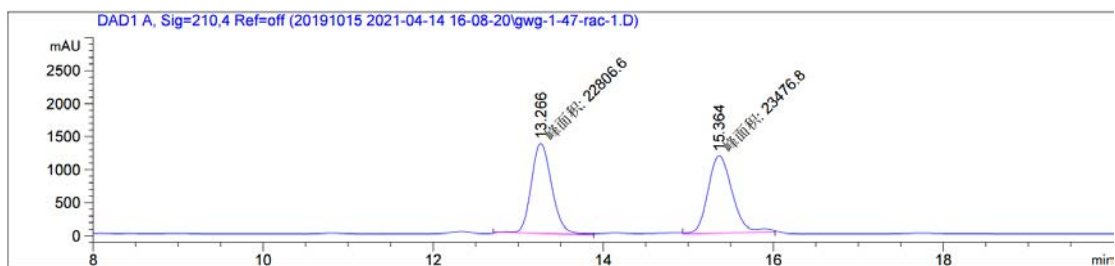

| Peak | RetTime[min] | Type | Width[min] | Area[mAu*s] | Height[mAU] | Area[%] |
|------|--------------|------|------------|-------------|-------------|---------|
| 1    | 13.266       | MM   | 0.2784     | 2.28066e4   | 1365.44788  | 49.2761 |
| 2    | 15.364       | MM   | 0.3332     | 2.34768e4   | 1174.31628  | 50.7239 |

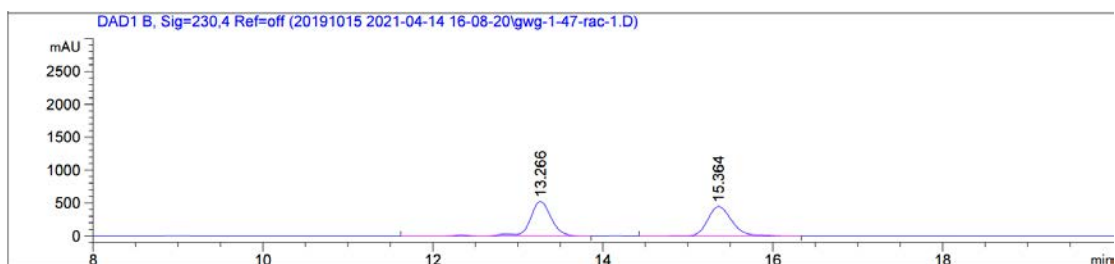

| Peak | RetTime[min] | Type | Width[min] | Area[mAu*s] | Height[mAU] | Area[%] |
|------|--------------|------|------------|-------------|-------------|---------|
| 1    | 13.266       | VB R | 0.2526     | 9109.55859  | 523.79852   | 50.6746 |
| 2    | 15.364       | BB   | 0.3052     | 8867.00977  | 447.42209   | 49.3254 |

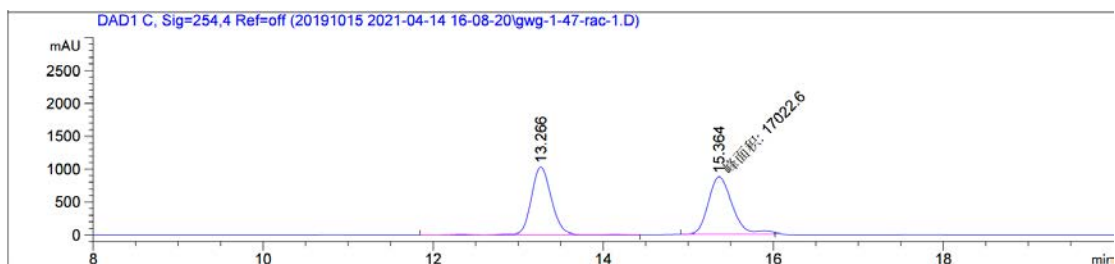

| Peak | RetTime[min] | Type | Width[min] | Area[mAu*s] | Height[mAU] | Area[%] |
|------|--------------|------|------------|-------------|-------------|---------|
| 1    | 13.266       | VV R | 0.2515     | 1.71665e4   | 1031.35742  | 50.2105 |
| 2    | 15.364       | MM   | 0.3265     | 1.70226e4   | 868.92230   | 49.7895 |

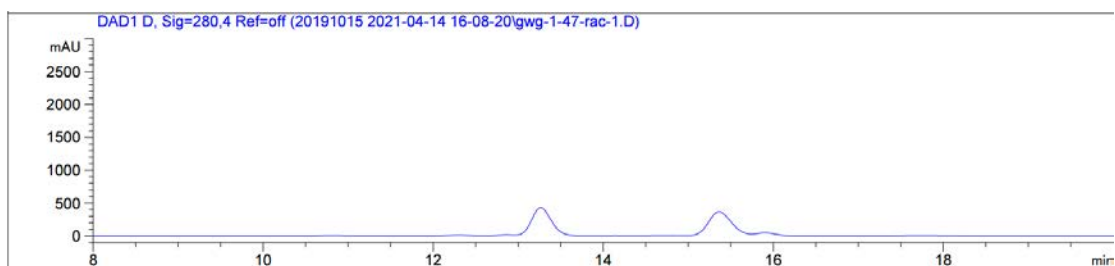

End of Report

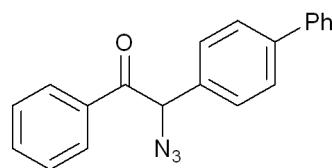

**2b**  
racemic

Sample Name: gwg-1-47-enantioenriched

HPLC Condition: IC, *n*-Hexane/*i*PrOH = 97:3, 1.0 mL/min

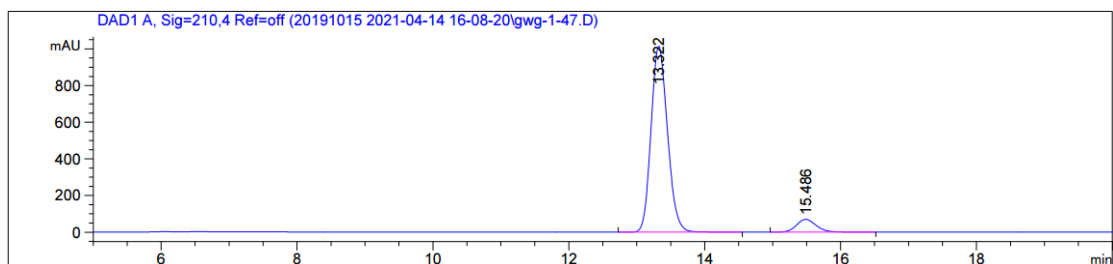

| Peak | RetTime[min] | Type | Width[min] | Area[mAu*s] | Height[mAU] | Area[%] |
|------|--------------|------|------------|-------------|-------------|---------|
| 1    | 13.322       | BB   | 0.2599     | 1.70318e4   | 1014.15057  | 92.4095 |
| 2    | 15.486       | BB   | 0.3102     | 1398.98914  | 69.70102    | 7.5905  |

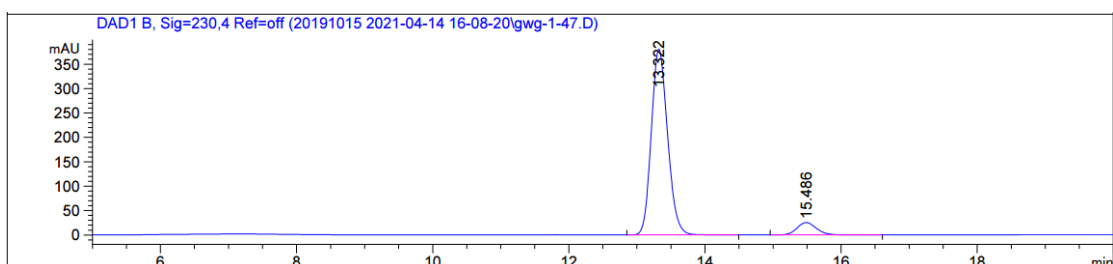

| Peak | RetTime[min] | Type | Width[min] | Area[mAu*s] | Height[mAU] | Area[%] |
|------|--------------|------|------------|-------------|-------------|---------|
| 1    | 13.322       | BB   | 0.2578     | 6324.69775  | 380.80521   | 92.6128 |
| 2    | 15.486       | BB   | 0.3088     | 504.48703   | 25.28175    | 7.3872  |

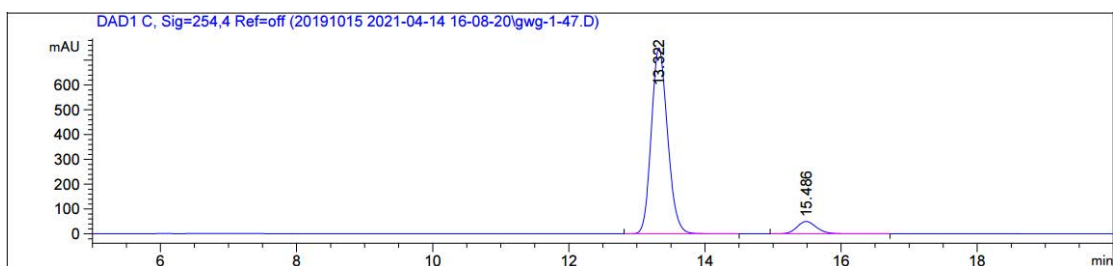

| Peak | RetTime[min] | Type | Width[min] | Area[mAu*s] | Height[mAU] | Area[%] |
|------|--------------|------|------------|-------------|-------------|---------|
| 1    | 13.322       | BB   | 0.2575     | 1.24294e4   | 749.45618   | 92.6018 |
| 2    | 15.486       | BB   | 0.3078     | 993.01617   | 49.55843    | 7.3982  |

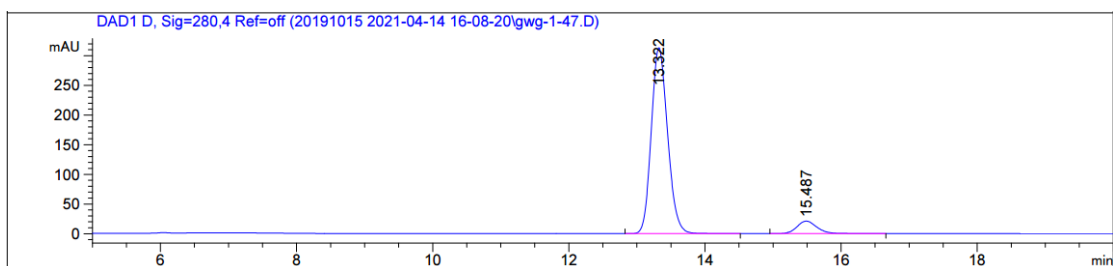

| Peak | RetTime[min] | Type | Width[min] | Area[mAu*s] | Height[mAU] | Area[%] |
|------|--------------|------|------------|-------------|-------------|---------|
| 1    | 13.322       | BB   | 0.2581     | 5214.35596  | 313.35446   | 92.4075 |
| 2    | 15.487       | BB   | 0.3134     | 428.42780   | 21.05302    | 7.5925  |

End of Report

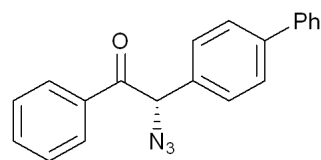

2b

enantioenriched

Sample Name: gwg-1-70-racemic

HPLC Condition: ODH, *n*-Hexane/*i*PrOH = 97:3, 1.0 mL/min

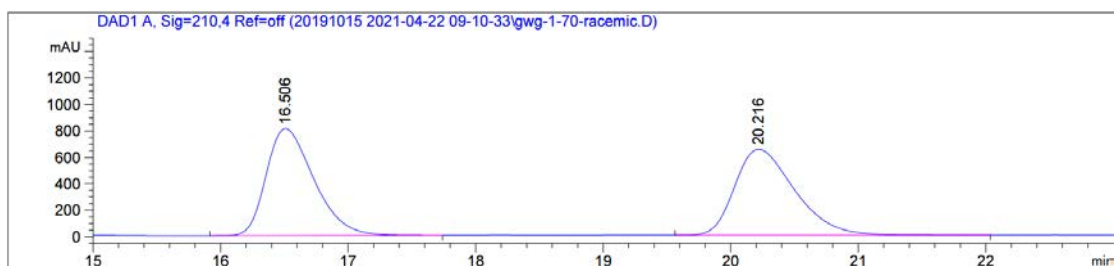

| Peak | RetTime[min] | Type | Width[min] | Area[mAu*s] | Height[mAU] | Area[%] |
|------|--------------|------|------------|-------------|-------------|---------|
| 1    | 16.506       | BB   | 0.3981     | 2.09364e4   | 808.45325   | 49.7208 |
| 2    | 20.216       | BB   | 0.5028     | 2.11715e4   | 648.70923   | 50.2792 |

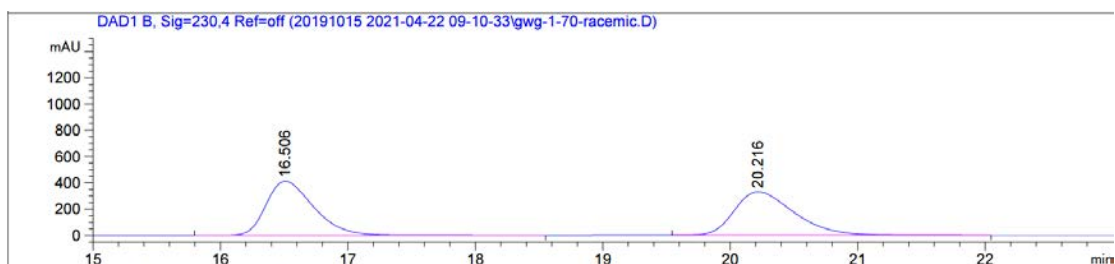

| Peak | RetTime[min] | Type | Width[min] | Area[mAu*s] | Height[mAU] | Area[%] |
|------|--------------|------|------------|-------------|-------------|---------|
| 1    | 16.506       | BB   | 0.3980     | 1.06764e4   | 412.46991   | 49.8799 |
| 2    | 20.216       | BB   | 0.4991     | 1.07278e4   | 330.13751   | 50.1201 |

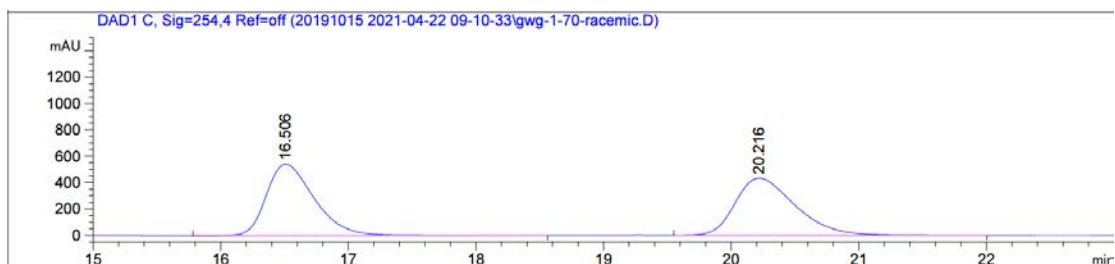

| Peak | RetTime[min] | Type | Width[min] | Area[mAu*s] | Height[mAU] | Area[%] |
|------|--------------|------|------------|-------------|-------------|---------|
| 1    | 16.506       | BB   | 0.3974     | 1.39574e4   | 540.32098   | 49.9010 |
| 2    | 20.216       | BB   | 0.4981     | 1.40128e4   | 432.35681   | 50.0990 |

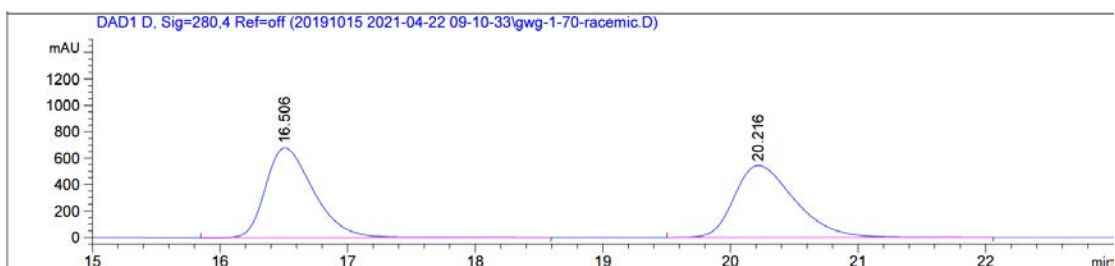

| Peak | RetTime[min] | Type | Width[min] | Area[mAu*s] | Height[mAU] | Area[%] |
|------|--------------|------|------------|-------------|-------------|---------|
| 1    | 16.506       | BB   | 0.3977     | 1.75513e4   | 678.67181   | 49.8416 |
| 2    | 20.216       | BB   | 0.4990     | 1.76628e4   | 543.69885   | 50.1584 |

End of Report

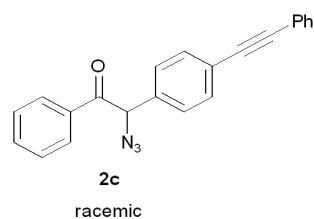

Sample Name: gwg-1-70-enantioenriched

HPLC Condition: ODH, *n*-Hexane/*i*PrOH = 97:3, 1.0 mL/min

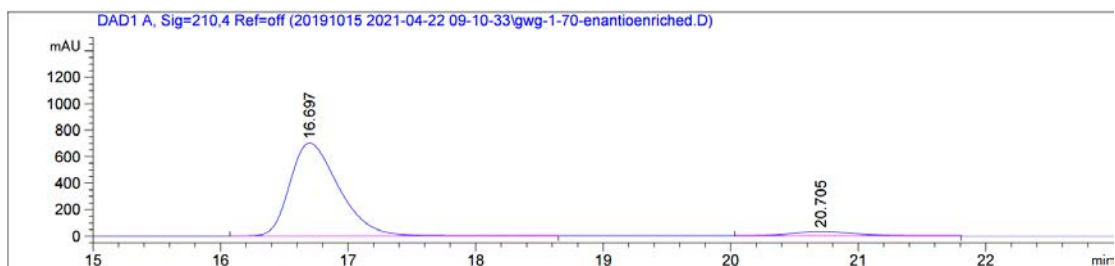

| Peak | RetTime[min] | Type | Width[min] | Area[mAu*s] | Height[mAU] | Area[%] |
|------|--------------|------|------------|-------------|-------------|---------|
| 1    | 16.697       | BB   | 0.4101     | 1.86602e4   | 701.98755   | 94.7017 |
| 2    | 20.705       | BB   | 0.4988     | 1043.98413  | 32.32163    | 5.2983  |

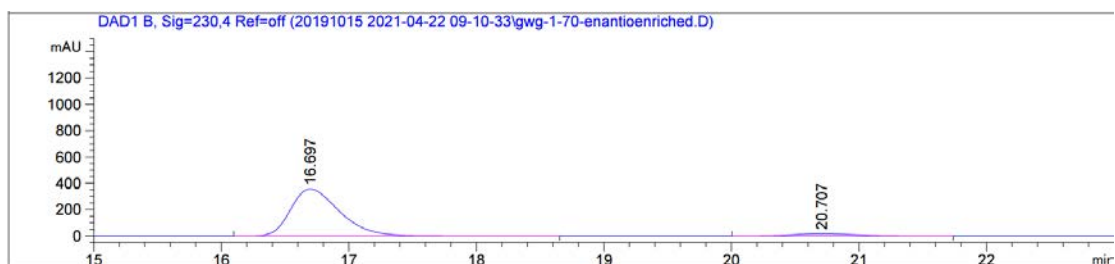

| Peak | RetTime[min] | Type | Width[min] | Area[mAu*s] | Height[mAU] | Area[%] |
|------|--------------|------|------------|-------------|-------------|---------|
| 1    | 16.697       | BB   | 0.4072     | 9466.77734  | 357.16183   | 94.7803 |
| 2    | 20.707       | BB   | 0.4906     | 521.34979   | 16.23601    | 5.2197  |

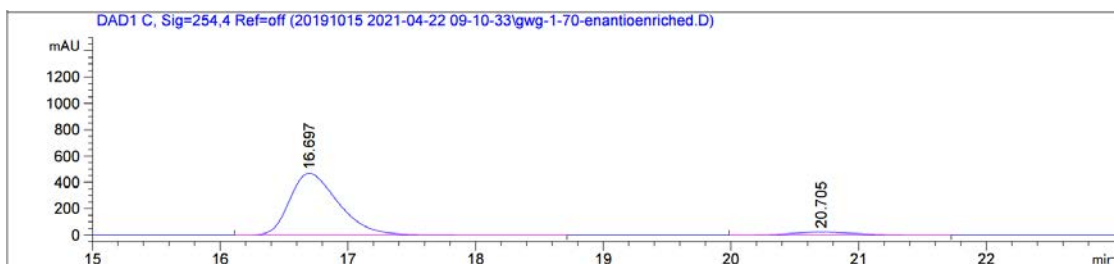

| Peak | RetTime[min] | Type | Width[min] | Area[mAu*s] | Height[mAU] | Area[%] |
|------|--------------|------|------------|-------------|-------------|---------|
| 1    | 16.697       | BB   | 0.4067     | 1.23817e4   | 467.91214   | 94.7920 |
| 2    | 20.705       | BB   | 0.4991     | 680.26526   | 21.16079    | 5.2080  |

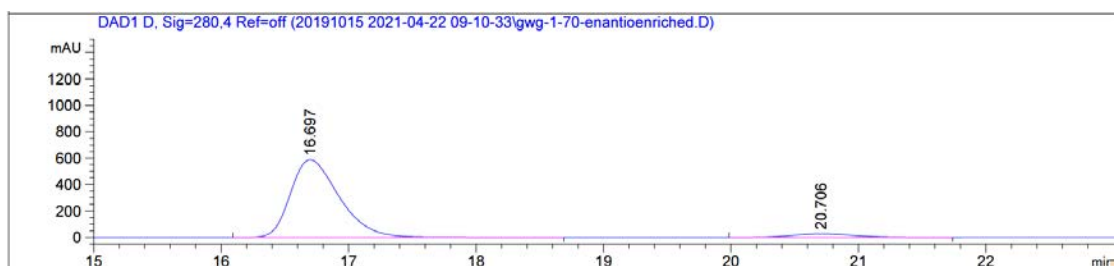

| Peak | RetTime[min] | Type | Width[min] | Area[mAu*s] | Height[mAU] | Area[%] |
|------|--------------|------|------------|-------------|-------------|---------|
| 1    | 16.697       | BB   | 0.4070     | 1.55784e4   | 588.23163   | 94.7855 |
| 2    | 20.706       | BB   | 0.5009     | 857.02344   | 26.66719    | 5.2145  |

End of Report

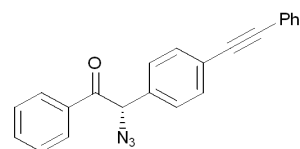

2c  
enantioenriched

Sample Name: gwg-1-42-racemic

HPLC condition: OD-H, *n*-Hexane/*i*PrOH = 99:1, 1.0 mL/min

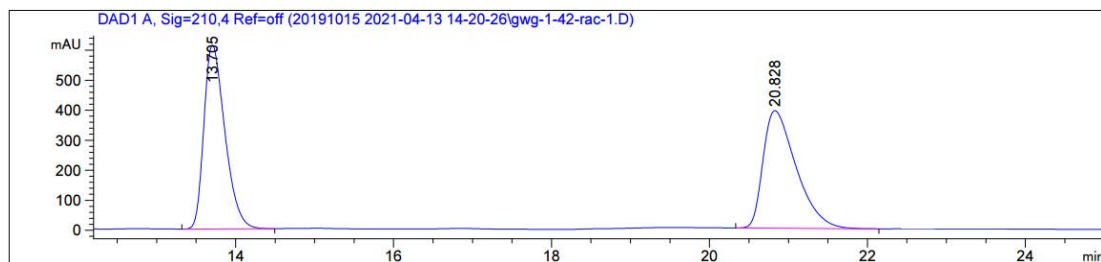

| Peak | RetTime[min] | Type | Width[min] | Area[mAu*s] | Height[mAU] | Area[%] |
|------|--------------|------|------------|-------------|-------------|---------|
| 1    | 13.705       | BB   | 0.2855     | 1.13173e4   | 612.70325   | 49.8690 |
| 2    | 20.828       | BB   | 0.4409     | 1.13767e4   | 391.62283   | 50.1310 |

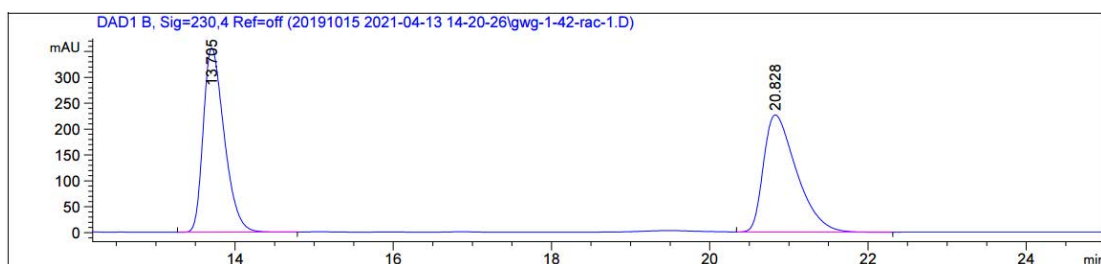

| Peak | RetTime[min] | Type | Width[min] | Area[mAu*s] | Height[mAU] | Area[%] |
|------|--------------|------|------------|-------------|-------------|---------|
| 1    | 13.705       | BB   | 0.2826     | 6552.40527  | 356.17844   | 50.0262 |
| 2    | 20.828       | BB   | 0.4397     | 6545.55371  | 226.14812   | 49.9738 |

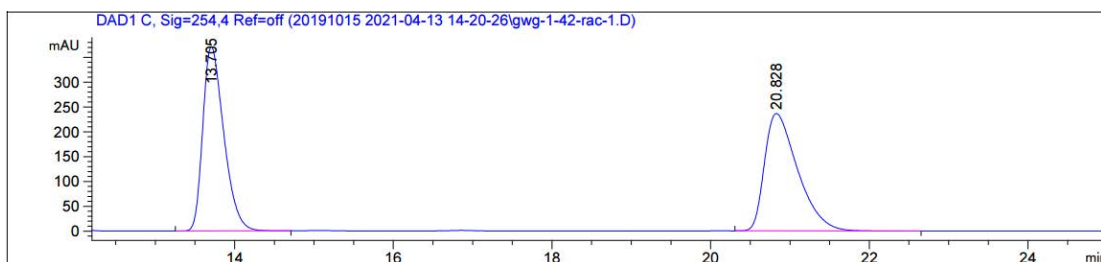

| Peak | RetTime[min] | Type | Width[min] | Area[mAu*s] | Height[mAU] | Area[%] |
|------|--------------|------|------------|-------------|-------------|---------|
| 1    | 13.705       | BB   | 0.2827     | 6828.00000  | 371.04672   | 49.8981 |
| 2    | 20.828       | BB   | 0.4424     | 6855.89795  | 236.37073   | 50.1019 |

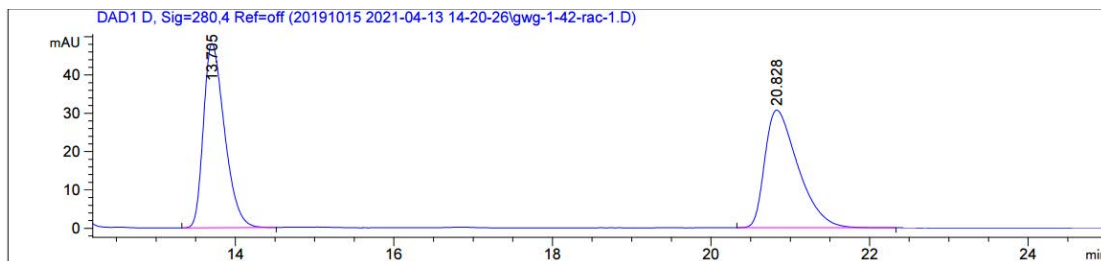

| Peak | RetTime[min] | Type | Width[min] | Area[mAu*s] | Height[mAU] | Area[%] |
|------|--------------|------|------------|-------------|-------------|---------|
| 1    | 13.705       | BB   | 0.2827     | 6828.00000  | 371.04672   | 49.8981 |
| 2    | 20.828       | BB   | 0.4424     | 6855.89795  | 236.37073   | 50.1019 |

End of Report

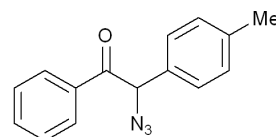

**2d**  
racemic

Sample Name: gwg-1-42-enantioenriched

HPLC Condition: OD-H, *n*-Hexane/*i*PrOH = 99:1, 1.0 mL/min

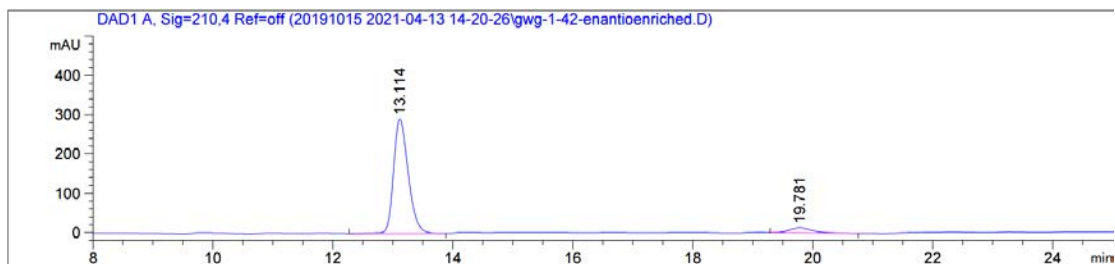

| Peak | RetTime[min] | Type | Width[min] | Area[mAu*s] | Height[mAU] | Area[%] |
|------|--------------|------|------------|-------------|-------------|---------|
| 1    | 13.114       | BB   | 0.2595     | 4925.44873  | 290.97800   | 93.7527 |
| 2    | 19.781       | BB   | 0.3901     | 328.21225   | 12.75865    | 6.2473  |

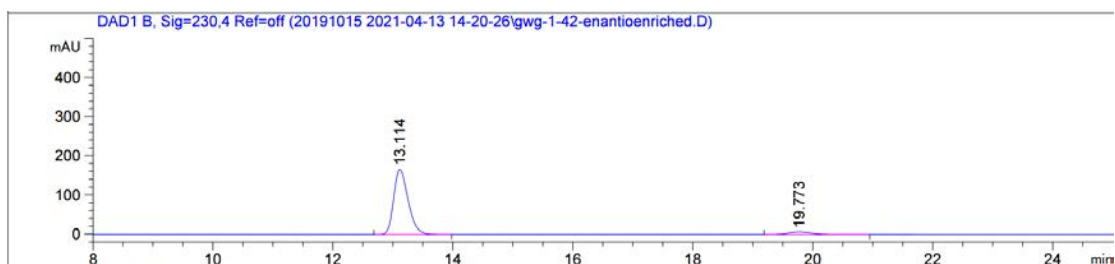

| Peak | RetTime[min] | Type | Width[min] | Area[mAu*s] | Height[mAU] | Area[%] |
|------|--------------|------|------------|-------------|-------------|---------|
| 1    | 13.114       | BB   | 0.2568     | 2779.88892  | 166.45003   | 93.9195 |
| 2    | 19.773       | BB   | 0.3936     | 179.97446   | 7.00917     | 6.0805  |

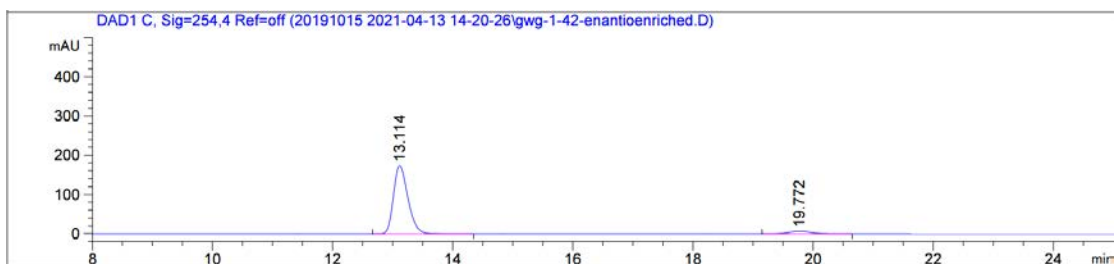

| Peak | RetTime[min] | Type | Width[min] | Area[mAu*s] | Height[mAU] | Area[%] |
|------|--------------|------|------------|-------------|-------------|---------|
| 1    | 13.114       | BB   | 0.2572     | 2913.18262  | 174.11984   | 93.9621 |
| 2    | 19.772       | BB   | 0.3965     | 187.19635   | 7.31652     | 6.0379  |

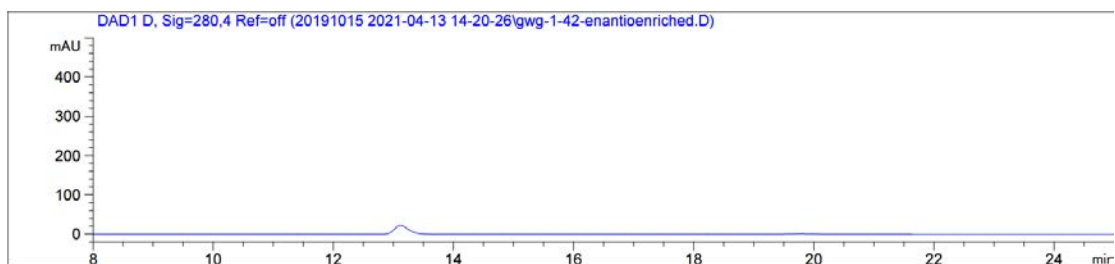

End of Report

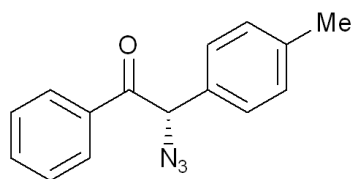

**2d**  
enantioenriched

Sample Name: gwg-3-27-racemic

HPLC Condition: IC, *n*-Hexane/*i*PrOH = 98:2, 1.0 mL/min

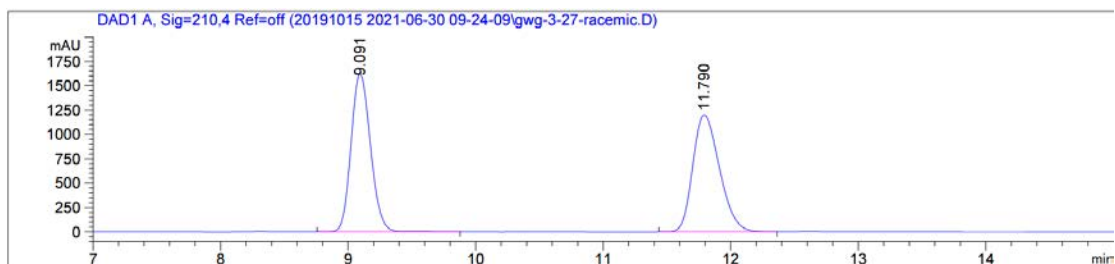

| Peak | RetTime[min] | Type | Width[min] | Area[mAu*s] | Height[mAU] | Area[%] |
|------|--------------|------|------------|-------------|-------------|---------|
| 1    | 9.091        | BV R | 0.1653     | 1.72059e4   | 1623.42700  | 49.5919 |
| 2    | 11.790       | BB   | 0.2259     | 1.74891e4   | 1200.97192  | 50.4081 |

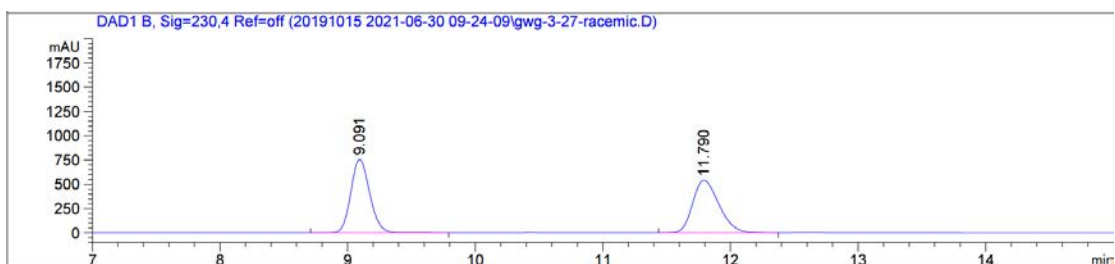

| Peak | RetTime[min] | Type | Width[min] | Area[mAu*s] | Height[mAU] | Area[%] |
|------|--------------|------|------------|-------------|-------------|---------|
| 1    | 9.091        | BV R | 0.1596     | 7779.95410  | 757.57751   | 50.0978 |
| 2    | 11.790       | BB   | 0.2228     | 7749.58936  | 541.94916   | 49.9022 |

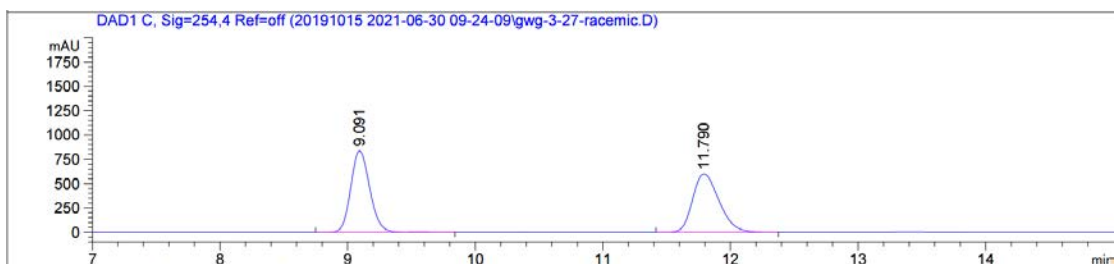

| Peak | RetTime[min] | Type | Width[min] | Area[mAu*s] | Height[mAU] | Area[%] |
|------|--------------|------|------------|-------------|-------------|---------|
| 1    | 9.091        | BV R | 0.1600     | 8640.17285  | 837.97394   | 50.0711 |
| 2    | 11.790       | BB   | 0.2231     | 8615.62891  | 601.35620   | 49.9289 |

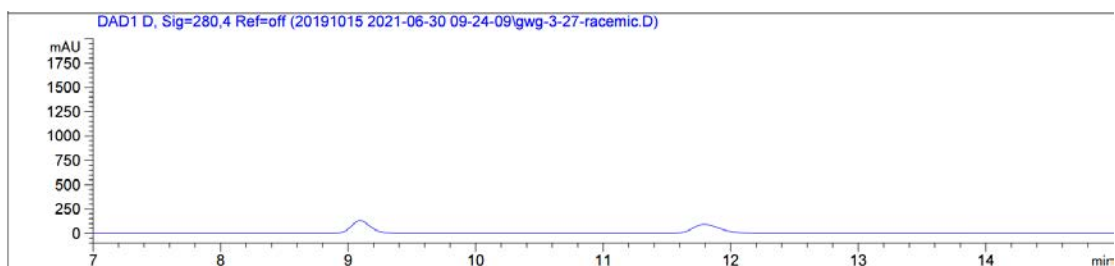

End of Report

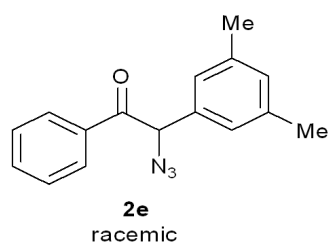

Sample Name: gwg-3-27-enantioenriched

HPLC Condition: IC, *n*-Hexane/*i*PrOH = 98:2, 1.0 mL/min

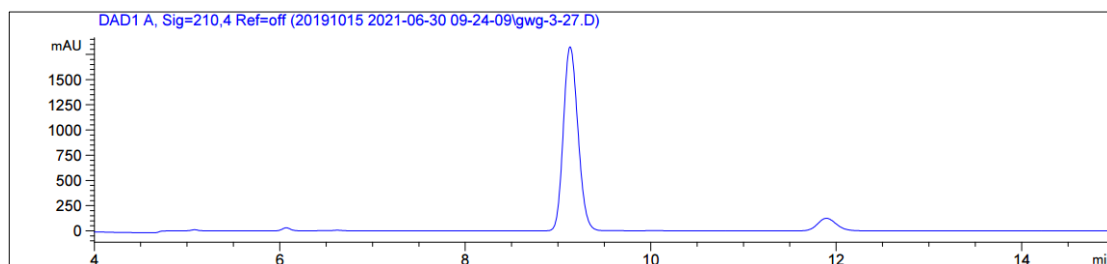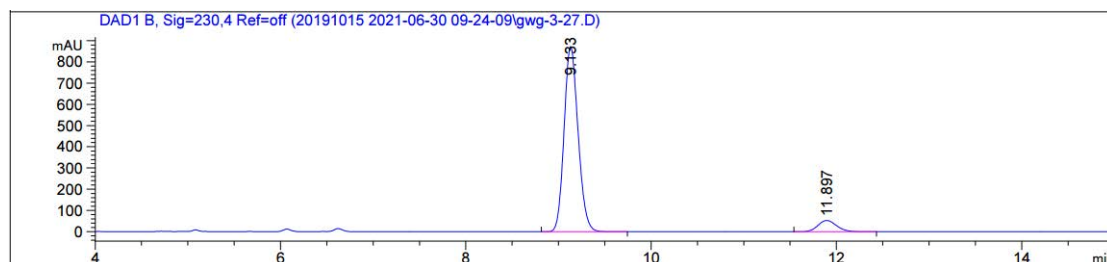

| Peak | RetTime[min] | Type | Width[min] | Area[mAu*s] | Height[mAU] | Area[%] |
|------|--------------|------|------------|-------------|-------------|---------|
| 1    | 9.133        | BB   | 0.1623     | 9151.08398  | 873.17218   | 92.4898 |
| 2    | 11.897       | BB   | 0.2174     | 743.06964   | 53.04055    | 7.5102  |

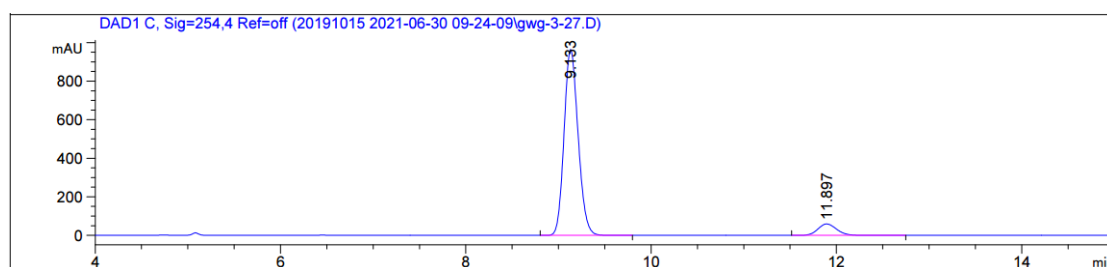

| Peak | RetTime[min] | Type | Width[min] | Area[mAu*s] | Height[mAU] | Area[%] |
|------|--------------|------|------------|-------------|-------------|---------|
| 1    | 9.133        | BB   | 0.1628     | 1.01523e4   | 964.74243   | 92.4236 |
| 2    | 11.897       | BB   | 0.2178     | 832.22565   | 59.27462    | 7.5764  |

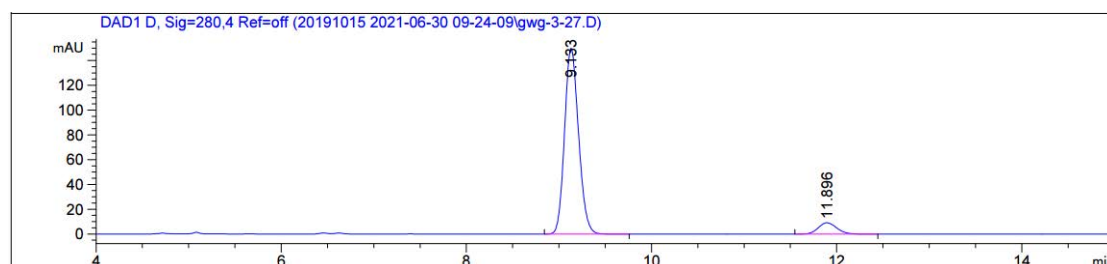

| Peak | RetTime[min] | Type | Width[min] | Area[mAu*s] | Height[mAU] | Area[%] |
|------|--------------|------|------------|-------------|-------------|---------|
| 1    | 9.133        | BB   | 0.1625     | 1575.54138  | 150.00868   | 92.4455 |
| 2    | 11.896       | BB   | 0.2178     | 128.75119   | 9.17229     | 7.5545  |

End of Report

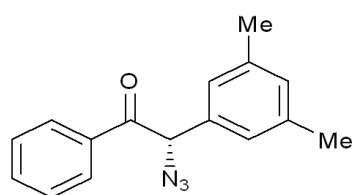

**2e**  
enantioenriched



Sample Name: gwg-1-44-racemic

HPLC Condition: ODH, *n*-Hexane/*i*PrOH = 99:1, 1.0 mL/min

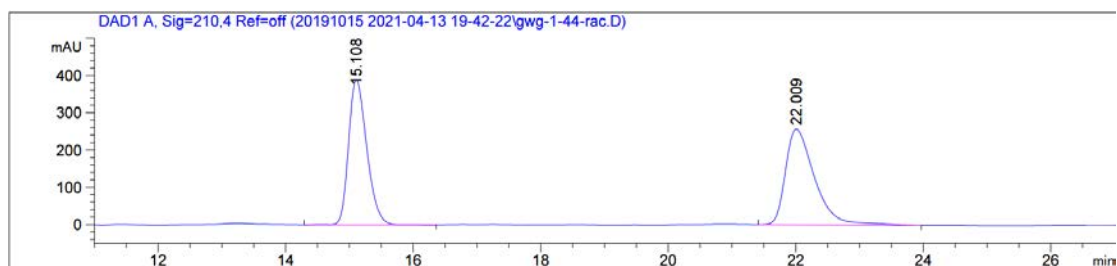

| Peak | RetTime[min] | Type | Width[min] | Area[mAu*s] | Height[mAU] | Area[%] |
|------|--------------|------|------------|-------------|-------------|---------|
| 1    | 15.108       | BB   | 0.3047     | 7692.92529  | 389.07913   | 48.8497 |
| 2    | 22.009       | BB   | 0.4771     | 8055.23828  | 256.00125   | 51.1503 |

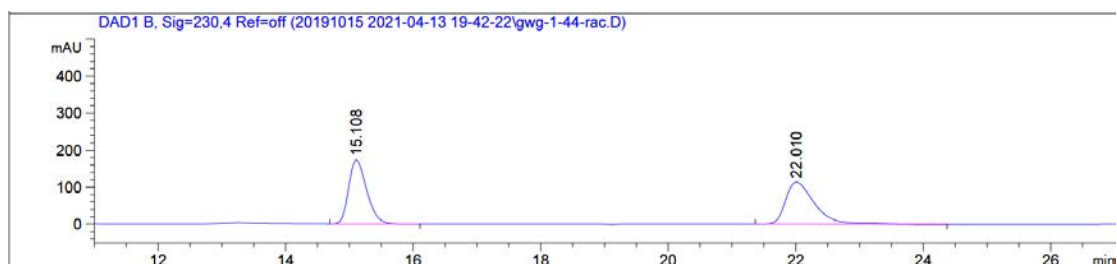

| Peak | RetTime[min] | Type | Width[min] | Area[mAu*s] | Height[mAU] | Area[%] |
|------|--------------|------|------------|-------------|-------------|---------|
| 1    | 15.108       | BB   | 0.3034     | 3395.94946  | 172.68091   | 48.5985 |
| 2    | 22.010       | BB   | 0.4790     | 3591.82056  | 113.54807   | 51.4015 |

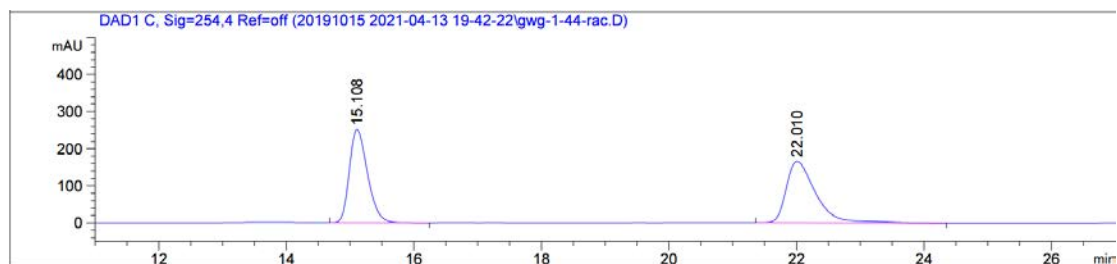

| Peak | RetTime[min] | Type | Width[min] | Area[mAu*s] | Height[mAU] | Area[%] |
|------|--------------|------|------------|-------------|-------------|---------|
| 1    | 15.108       | BB   | 0.3039     | 4955.11670  | 251.47105   | 48.5262 |
| 2    | 22.010       | BB   | 0.4809     | 5256.09717  | 165.32623   | 51.4738 |

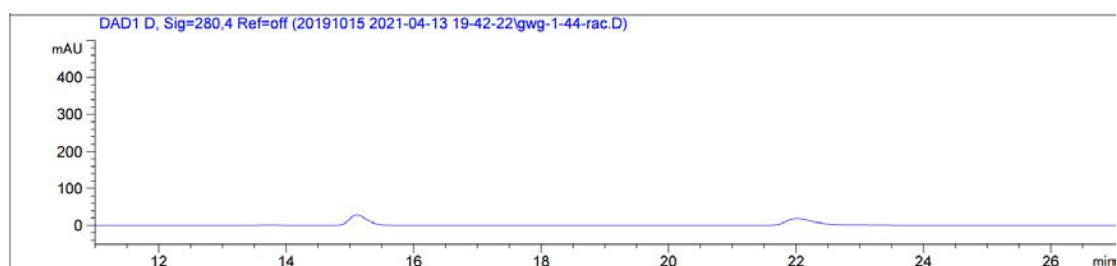

End of Report

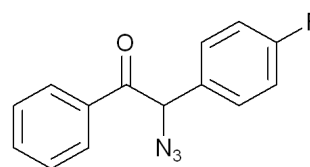

**2f**  
racemic

Sample Name: gwg-1-44-enantioenriched

HPLC Condition: ODH, *n*-Hexane/*i*PrOH = 99:1, 1.0 mL/min

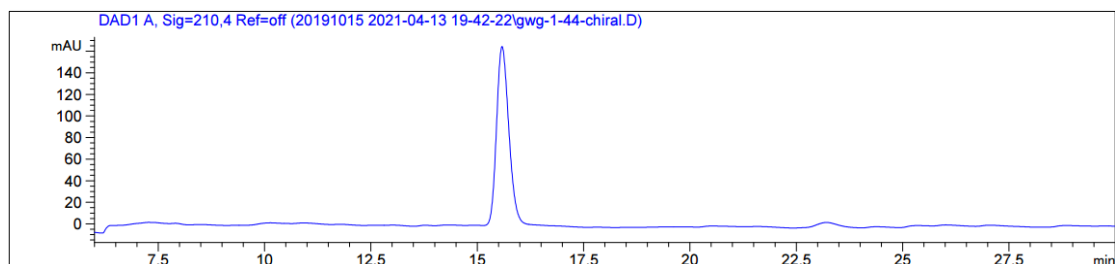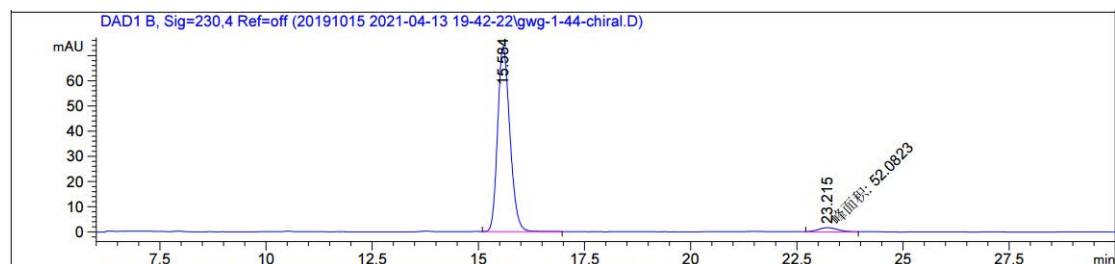

| Peak | RetTime[min] | Type | Width[min] | Area[mAu*s] | Height[mAU] | Area[%] |
|------|--------------|------|------------|-------------|-------------|---------|
| 1    | 15.584       | BB   | 0.3108     | 1475.24658  | 73.30584    | 96.5900 |
| 2    | 23.215       | MM   | 0.5249     | 52.08226    | 1.65381     | 3.4100  |

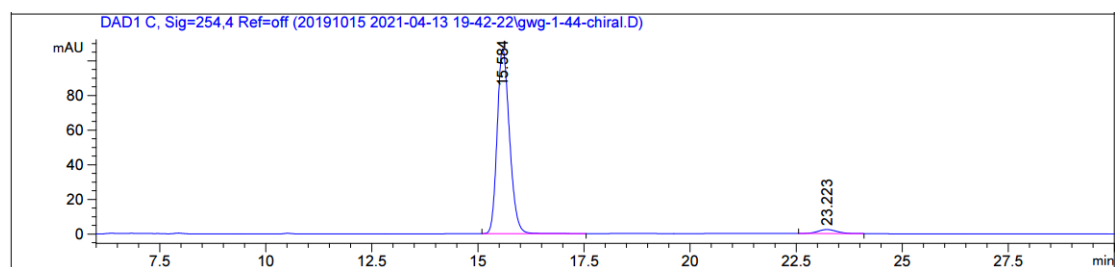

| Peak | RetTime[min] | Type | Width[min] | Area[mAu*s] | Height[mAU] | Area[%] |
|------|--------------|------|------------|-------------|-------------|---------|
| 1    | 15.584       | BB   | 0.3132     | 2151.47949  | 106.71661   | 96.8492 |
| 2    | 23.223       | BB   | 0.4387     | 69.99355    | 2.28908     | 3.1508  |

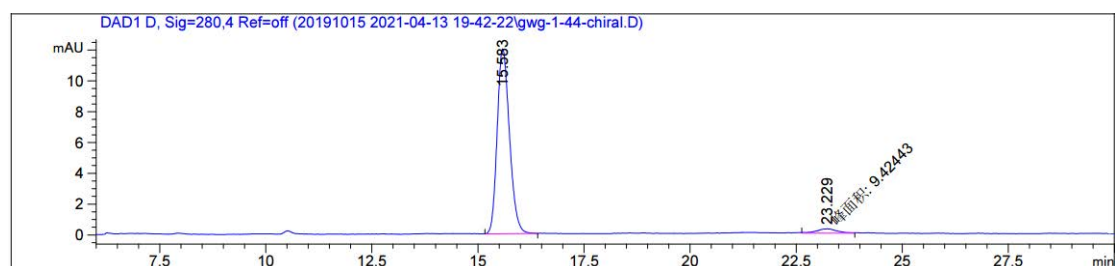

| Peak | RetTime[min] | Type | Width[min] | Area[mAu*s] | Height[mAU] | Area[%] |
|------|--------------|------|------------|-------------|-------------|---------|
| 1    | 15.583       | BB   | 0.3125     | 241.19707   | 11.99922    | 96.2396 |
| 2    | 23.229       | MM   | 0.5680     | 9.42443     | 2.76542e-1  | 3.7604  |

End of Report

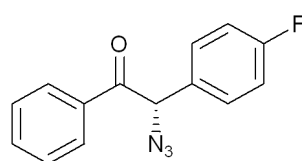

**2f**  
enantioenriched

Sample Name: gwg-1-45-racemic

HPLC Condition: ODH, *n*-Hexane/*i*PrOH = 99:1, 1.0 mL/min

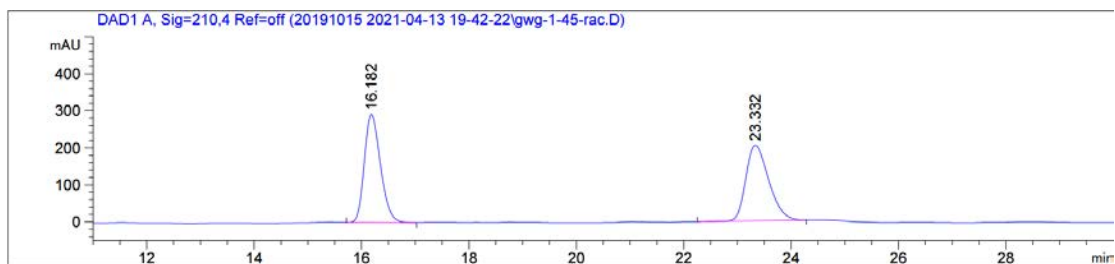

| Peak | RetTime[min] | Type | Width[min] | Area[mAu*s] | Height[mAU] | Area[%] |
|------|--------------|------|------------|-------------|-------------|---------|
| 1    | 16.182       | BB   | 0.3238     | 6108.70459  | 292.34091   | 50.1951 |
| 2    | 23.332       | BB   | 0.4562     | 6061.22217  | 204.27145   | 49.8049 |

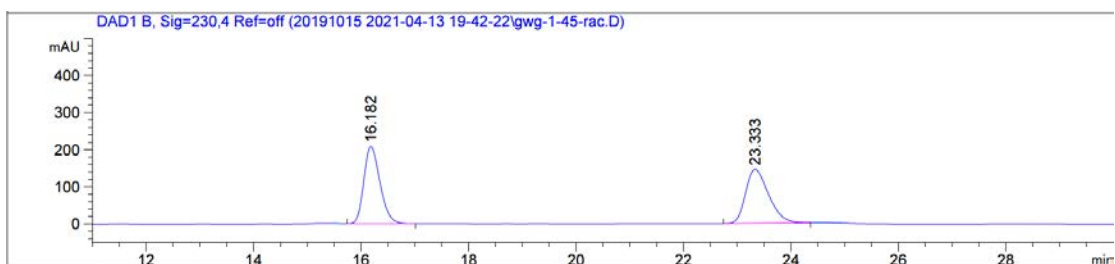

| Peak | RetTime[min] | Type | Width[min] | Area[mAu*s] | Height[mAU] | Area[%] |
|------|--------------|------|------------|-------------|-------------|---------|
| 1    | 16.182       | BB   | 0.3208     | 4325.56348  | 207.86732   | 50.2204 |
| 2    | 23.333       | BB   | 0.4570     | 4287.60254  | 144.97192   | 49.7796 |

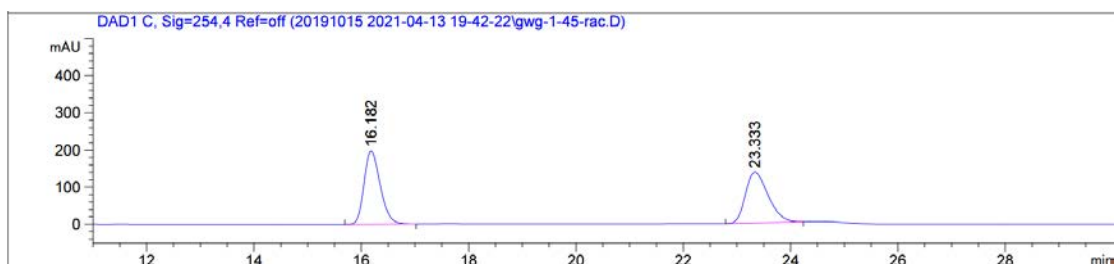

| Peak | RetTime[min] | Type | Width[min] | Area[mAu*s] | Height[mAU] | Area[%] |
|------|--------------|------|------------|-------------|-------------|---------|
| 1    | 16.182       | BB   | 0.3216     | 4122.50684  | 197.40228   | 50.6515 |
| 2    | 23.333       | BB   | 0.4526     | 4016.45874  | 136.77499   | 49.3485 |

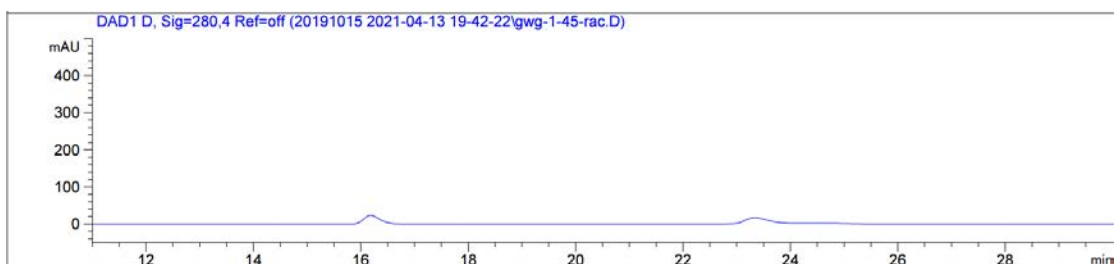

End of Report

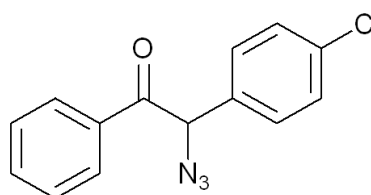

**2g**  
racemic

S-259

Sample Name: gwg-1-45-enantioenriched

HPLC Condition: ODH, *n*-Hexane/*i*PrOH = 99:1, 1.0 mL/min

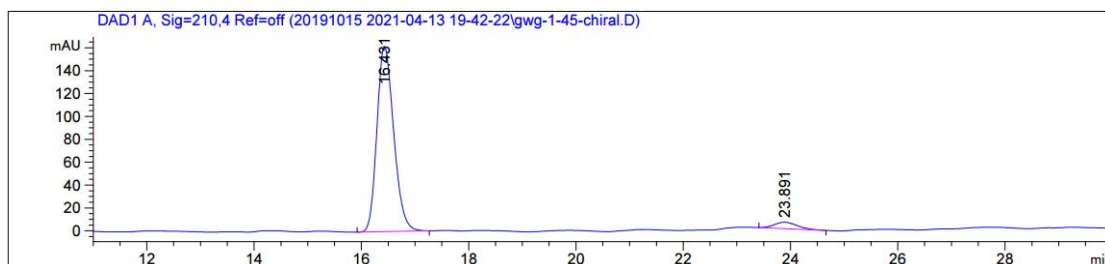

| Peak | RetTime[min] | Type | Width[min] | Area[mAu*s] | Height[mAU] | Area[%] |
|------|--------------|------|------------|-------------|-------------|---------|
| 1    | 16.431       | BB   | 0.3375     | 3521.53052  | 162.07024   | 95.4833 |
| 2    | 23.891       | BB   | 0.4517     | 166.58087   | 5.58906     | 4.5167  |

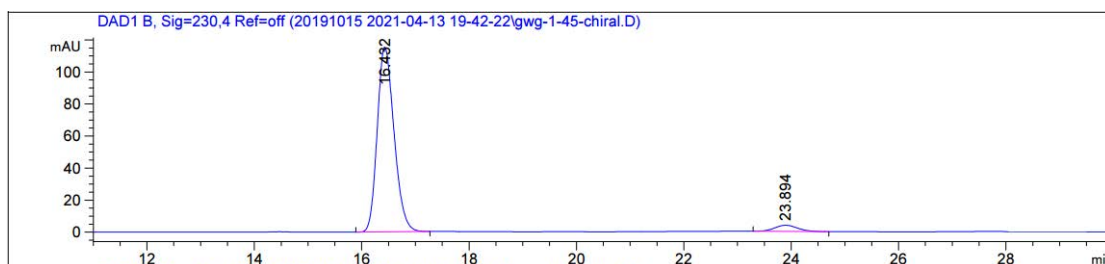

| Peak | RetTime[min] | Type | Width[min] | Area[mAu*s] | Height[mAU] | Area[%] |
|------|--------------|------|------------|-------------|-------------|---------|
| 1    | 16.432       | BB   | 0.3377     | 2510.08228  | 115.43481   | 95.7134 |
| 2    | 23.894       | BB   | 0.4391     | 112.41541   | 3.82309     | 4.2866  |

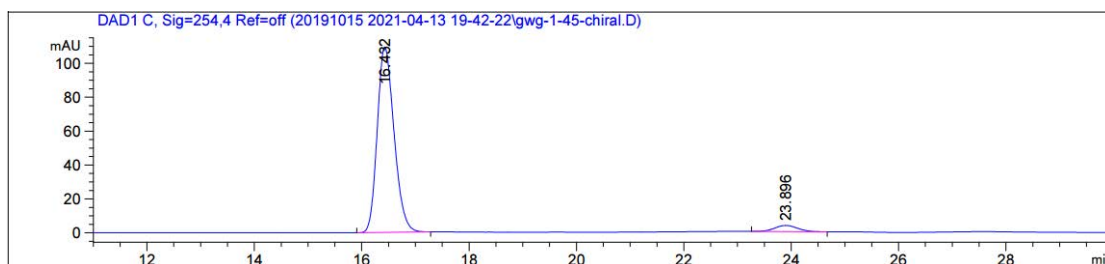

| Peak | RetTime[min] | Type | Width[min] | Area[mAu*s] | Height[mAU] | Area[%] |
|------|--------------|------|------------|-------------|-------------|---------|
| 1    | 16.432       | BB   | 0.3378     | 2381.09204  | 109.43916   | 95.7777 |
| 2    | 23.896       | BB   | 0.4439     | 104.96941   | 3.60300     | 4.2223  |

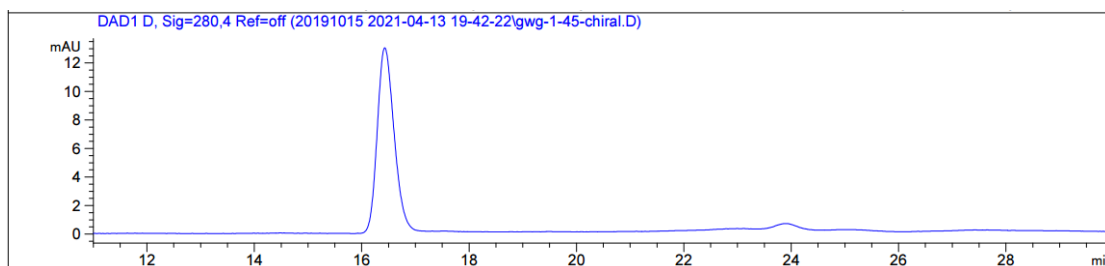

End of Report

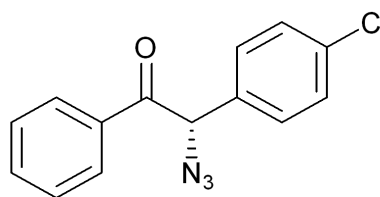

**2g**  
enantioenriched

Sample Name: gwg-1-69-racemic

HPLC Condition: ODH, *n*-Hexane/*i*PrOH = 99:1, 1.0 mL/min

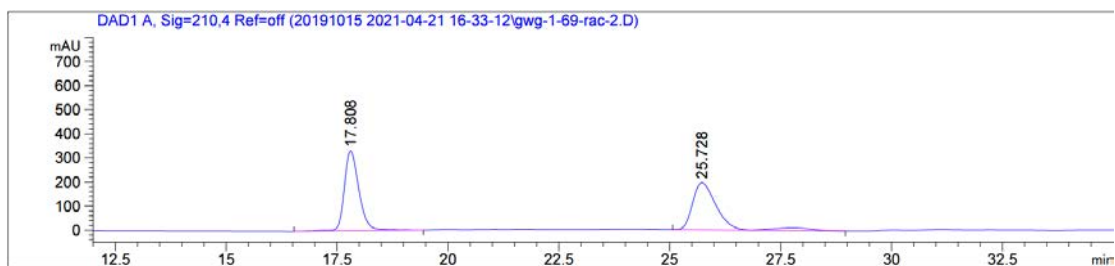

| Peak | RetTime[min] | Type | Width[min] | Area[mAu*s] | Height[mAU] | Area[%] |
|------|--------------|------|------------|-------------|-------------|---------|
| 1    | 17.808       | BB   | 0.3544     | 7696.07617  | 332.11020   | 49.6066 |
| 2    | 25.728       | BV R | 0.5586     | 7818.13721  | 195.73138   | 50.3934 |

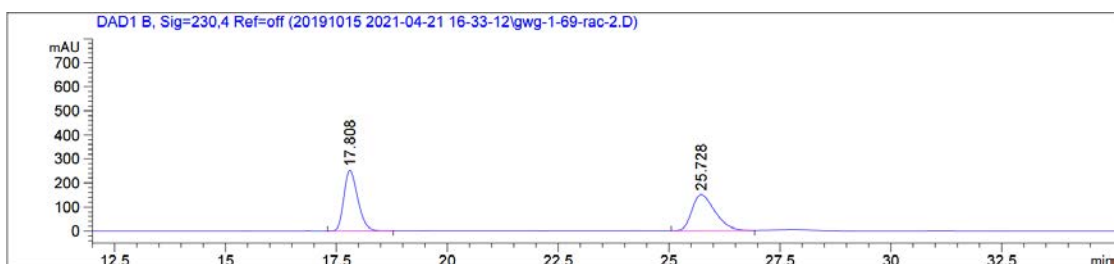

| Peak | RetTime[min] | Type | Width[min] | Area[mAu*s] | Height[mAU] | Area[%] |
|------|--------------|------|------------|-------------|-------------|---------|
| 1    | 17.808       | BB   | 0.3389     | 5478.79736  | 250.78078   | 50.4163 |
| 2    | 25.728       | BB   | 0.5571     | 5388.31396  | 149.29057   | 49.5837 |

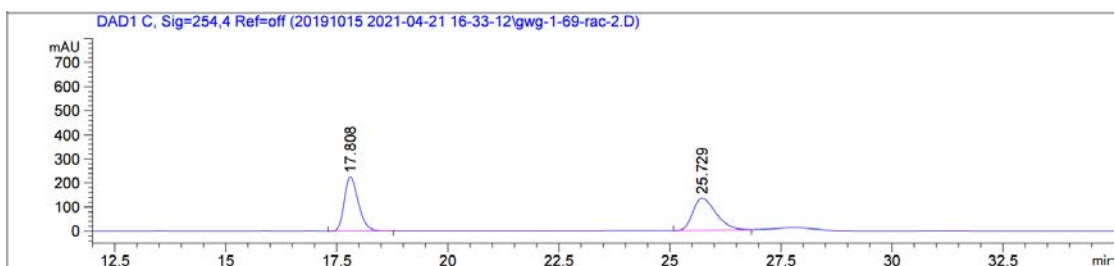

| Peak | RetTime[min] | Type | Width[min] | Area[mAu*s] | Height[mAU] | Area[%] |
|------|--------------|------|------------|-------------|-------------|---------|
| 1    | 17.808       | BB   | 0.3391     | 4899.62891  | 224.07776   | 50.5858 |
| 2    | 25.729       | BB   | 0.5553     | 4786.15576  | 133.16766   | 49.4142 |

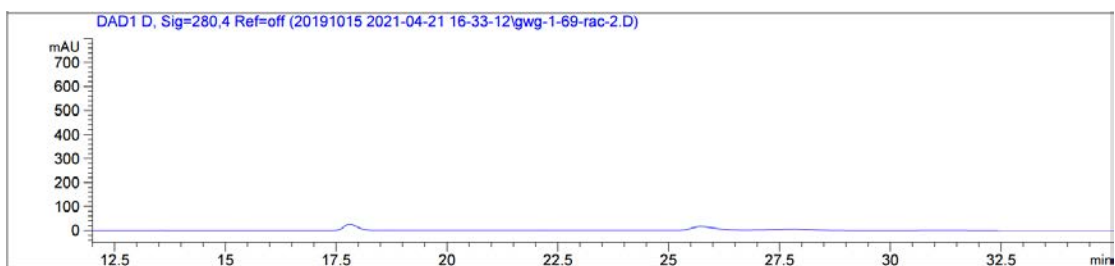

End of Report

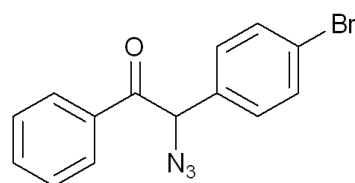

**2h**  
racemic

Sample Name: gwg-1-69-enantioenriched

HPLC Condition: ODH, *n*-Hexane/*i*PrOH = 99:1, 1.0 mL/min

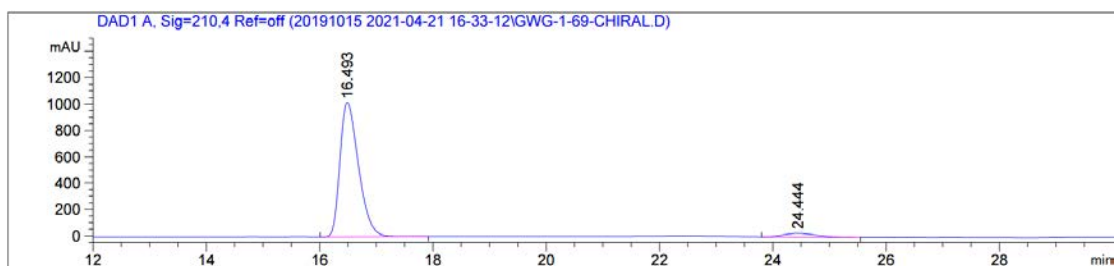

| Peak | RetTime[min] | Type | Width[min] | Area[mAu*s] | Height[mAU] | Area[%] |
|------|--------------|------|------------|-------------|-------------|---------|
| 1    | 16.493       | BB   | 0.3512     | 2.31659e4   | 1019.07037  | 95.5994 |
| 2    | 24.444       | BB   | 0.5730     | 1066.35999  | 28.86527    | 4.4006  |

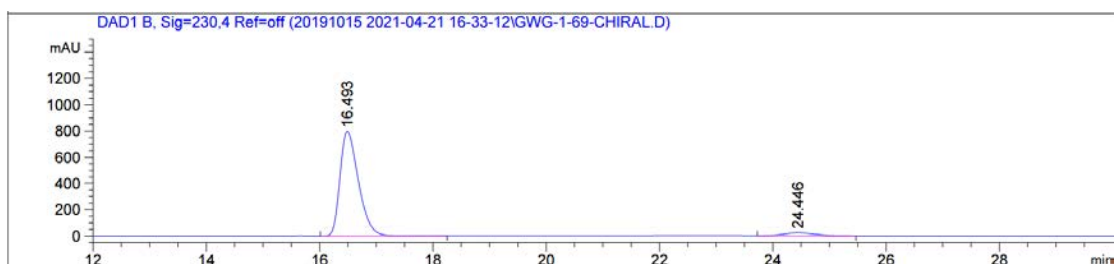

| Peak | RetTime[min] | Type | Width[min] | Area[mAu*s] | Height[mAU] | Area[%] |
|------|--------------|------|------------|-------------|-------------|---------|
| 1    | 16.493       | BB   | 0.3472     | 1.79595e4   | 796.10510   | 95.5967 |
| 2    | 24.446       | BB   | 0.5739     | 827.24628   | 22.44786    | 4.4033  |

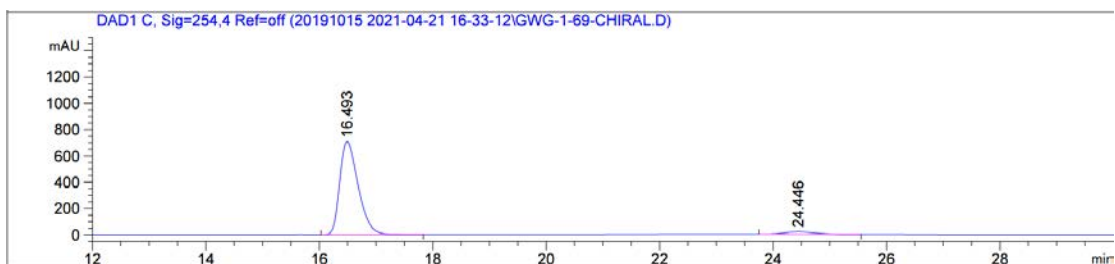

| Peak | RetTime[min] | Type | Width[min] | Area[mAu*s] | Height[mAU] | Area[%] |
|------|--------------|------|------------|-------------|-------------|---------|
| 1    | 16.493       | BB   | 0.3474     | 1.60041e4   | 708.77216   | 95.5521 |
| 2    | 24.446       | BB   | 0.5756     | 744.98035   | 20.13910    | 4.4479  |

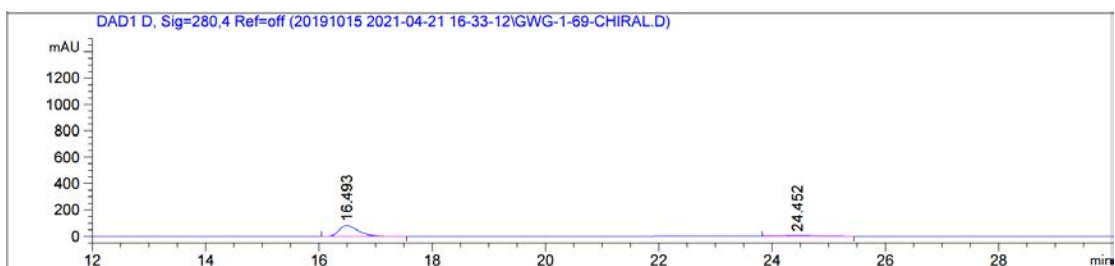

| Peak | RetTime[min] | Type | Width[min] | Area[mAu*s] | Height[mAU] | Area[%] |
|------|--------------|------|------------|-------------|-------------|---------|
| 1    | 16.493       | BB   | 0.3508     | 1852.25269  | 81.60120    | 95.4108 |
| 2    | 24.452       | BB   | 0.5267     | 89.09206    | 2.36912     | 4.5892  |

End of Report

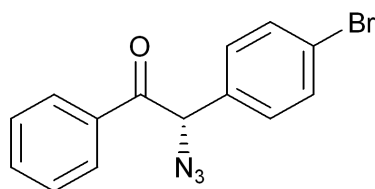

2h

S-262 enantioenriched

Sample Name: gwg-1-48-racemic

HPLC Condition: ODH, *n*-Hexane/*i*PrOH = 99:1, 1.0 mL/min

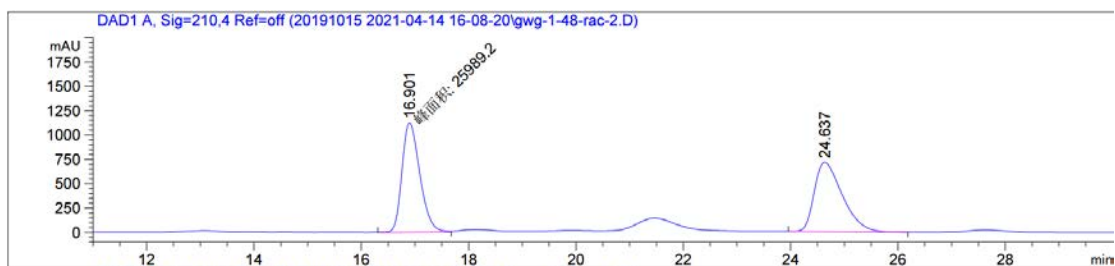

| Peak | RetTime[min] | Type | Width[min] | Area[mAu*s] | Height[mAU] | Area[%] |
|------|--------------|------|------------|-------------|-------------|---------|
| 1    | 16.901       | MM   | 0.3848     | 2.59892e4   | 1125.60767  | 50.2913 |
| 2    | 24.637       | BB   | 0.5557     | 2.56882e4   | 710.64301   | 49.7087 |

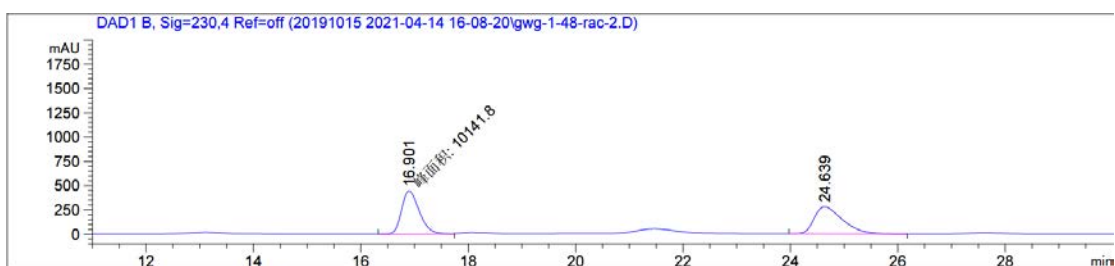

| Peak | RetTime[min] | Type | Width[min] | Area[mAu*s] | Height[mAU] | Area[%] |
|------|--------------|------|------------|-------------|-------------|---------|
| 1    | 16.901       | MM   | 0.3802     | 1.01418e4   | 444.53177   | 50.0810 |
| 2    | 24.639       | BB   | 0.5570     | 1.01090e4   | 277.48788   | 49.9190 |

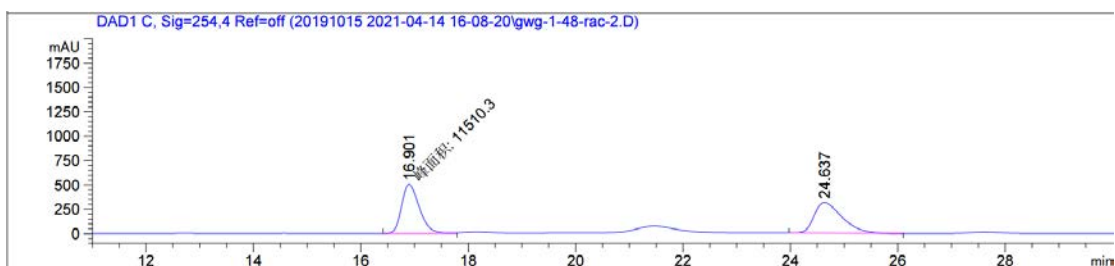

| Peak | RetTime[min] | Type | Width[min] | Area[mAu*s] | Height[mAU] | Area[%] |
|------|--------------|------|------------|-------------|-------------|---------|
| 1    | 16.901       | MM   | 0.3810     | 1.15103e4   | 503.56229   | 50.5229 |
| 2    | 24.637       | BB   | 0.5507     | 1.12720e4   | 314.09879   | 49.4771 |

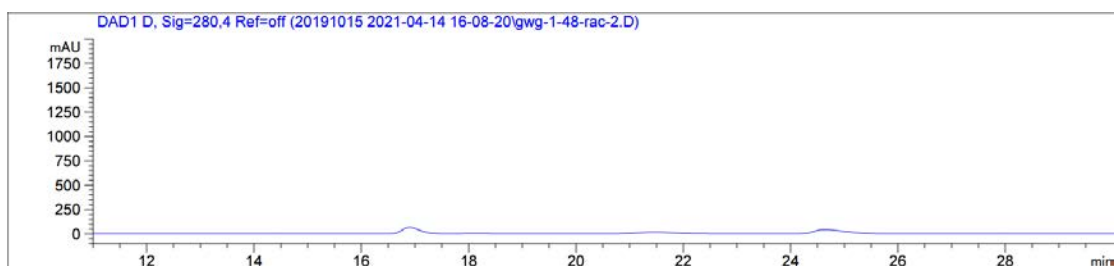

End of Report

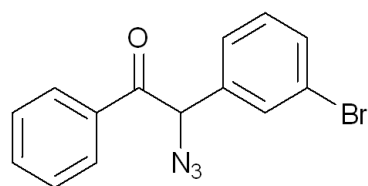

**2i**  
racemic

Sample Name: gwg-1-48-enantioenriched

HPLC Condition: ODH, *n*-Hexane/*i*PrOH = 99:1, 1.0 mL/min

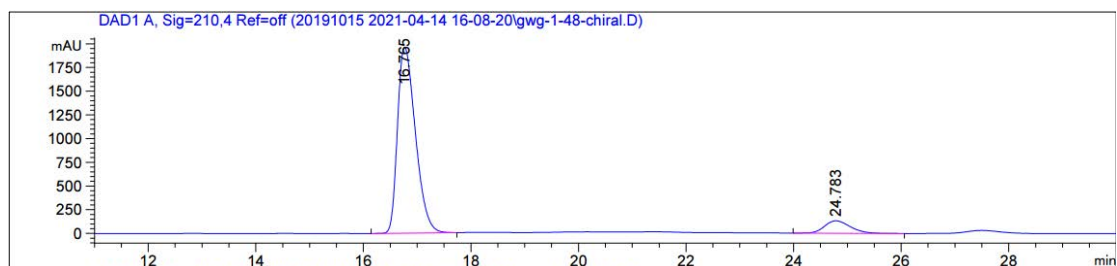

| Peak | RetTime[min] | Type | Width[min] | Area[mAu*s] | Height[mAU] | Area[%] |
|------|--------------|------|------------|-------------|-------------|---------|
| 1    | 16.765       | BB   | 0.3596     | 4.53575e4   | 1962.81848  | 91.2625 |
| 2    | 24.783       | BB   | 0.5149     | 4342.53906  | 130.93690   | 8.7375  |

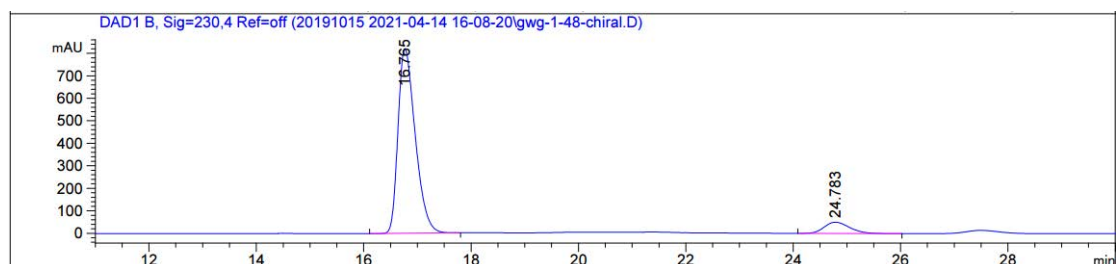

| Peak | RetTime[min] | Type | Width[min] | Area[mAu*s] | Height[mAU] | Area[%] |
|------|--------------|------|------------|-------------|-------------|---------|
| 1    | 16.765       | BB   | 0.3440     | 1.83041e4   | 821.47205   | 91.7526 |
| 2    | 24.783       | BB   | 0.5095     | 1645.30847  | 50.05591    | 8.2474  |

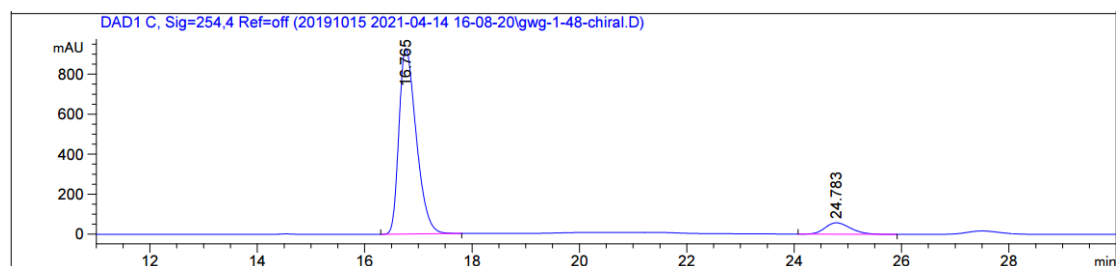

| Peak | RetTime[min] | Type | Width[min] | Area[mAu*s] | Height[mAU] | Area[%] |
|------|--------------|------|------------|-------------|-------------|---------|
| 1    | 16.765       | BB   | 0.3446     | 2.07164e4   | 927.45416   | 91.7391 |
| 2    | 24.783       | BB   | 0.5105     | 1865.46594  | 56.89314    | 8.2609  |

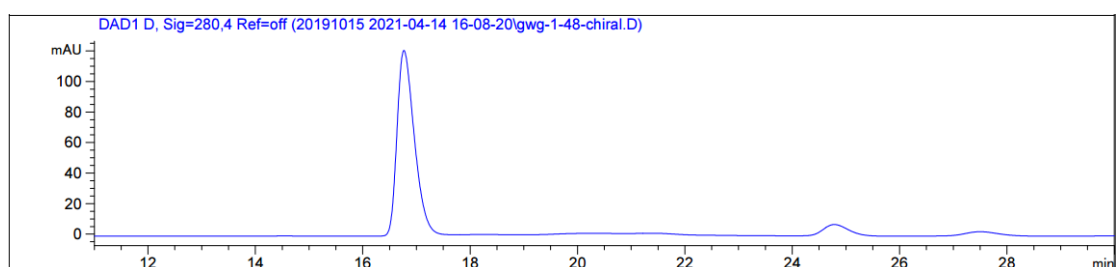

End of Report

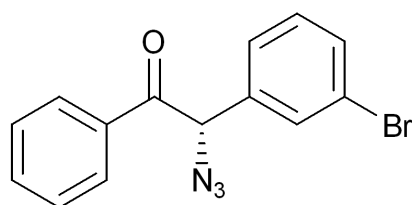

2i

enantioenriched

S-264



Sample Name: gwg-1-100-racemic

HPLC Condition: ODH, *n*-Hexane/*i*PrOH = 97:3, 1.0 mL/min

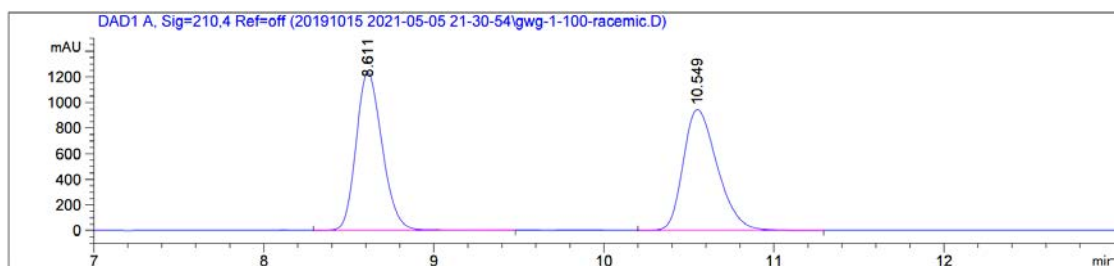

| Peak | RetTime[min] | Type | Width[min] | Area[mAu*s] | Height[mAU] | Area[%] |
|------|--------------|------|------------|-------------|-------------|---------|
| 1    | 8.611        | BV R | 0.1662     | 1.31242e4   | 1231.74316  | 49.9860 |
| 2    | 10.549       | BB   | 0.2162     | 1.31315e4   | 944.38702   | 50.0140 |

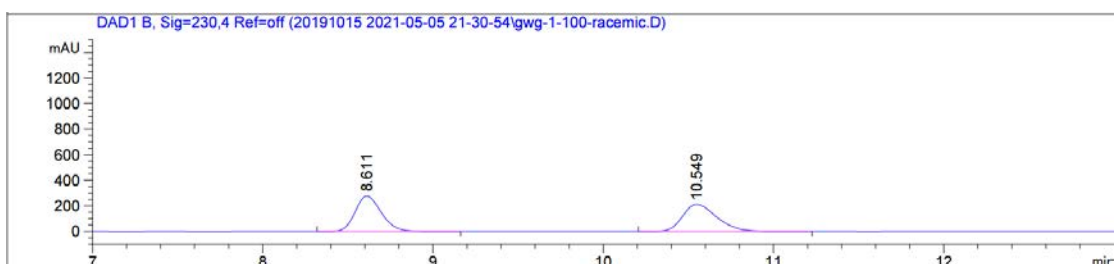

| Peak | RetTime[min] | Type | Width[min] | Area[mAu*s] | Height[mAU] | Area[%] |
|------|--------------|------|------------|-------------|-------------|---------|
| 1    | 8.611        | BB   | 0.1654     | 2928.03125  | 276.73859   | 49.9673 |
| 2    | 10.549       | BB   | 0.2159     | 2931.86011  | 211.23080   | 50.0327 |

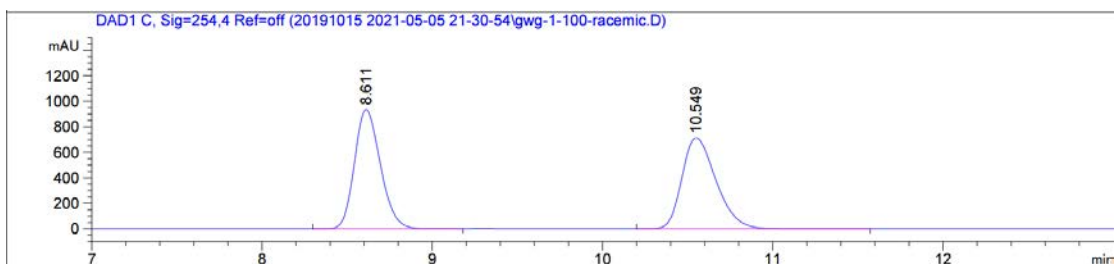

| Peak | RetTime[min] | Type | Width[min] | Area[mAu*s] | Height[mAU] | Area[%] |
|------|--------------|------|------------|-------------|-------------|---------|
| 1    | 8.611        | BB   | 0.1653     | 9886.88770  | 935.62610   | 49.9634 |
| 2    | 10.549       | BB   | 0.2158     | 9901.36621  | 714.15643   | 50.0366 |

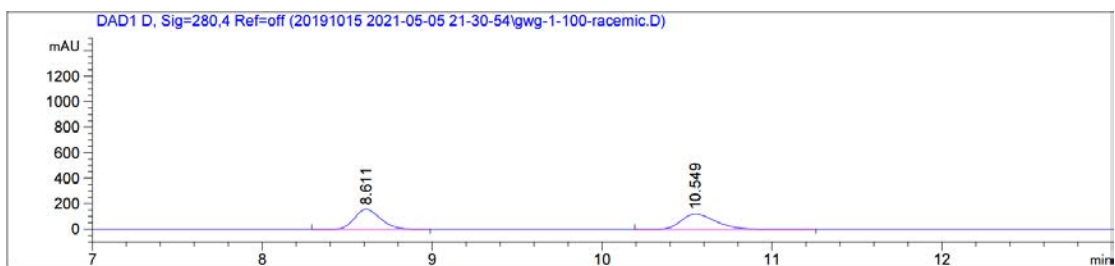

| Peak | RetTime[min] | Type | Width[min] | Area[mAu*s] | Height[mAU] | Area[%] |
|------|--------------|------|------------|-------------|-------------|---------|
| 1    | 8.611        | BB   | 0.1653     | 1637.08777  | 154.89624   | 49.8418 |
| 2    | 10.549       | BB   | 0.2162     | 1647.47949  | 118.48223   | 50.1582 |

End of Report

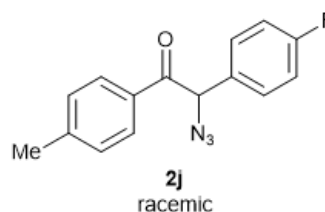

S-

Sample Name: gwg-1-100-enantioenriched

HPLC Condition: ODH, *n*-Hexane/*i*PrOH = 97:3, 1.0 mL/min

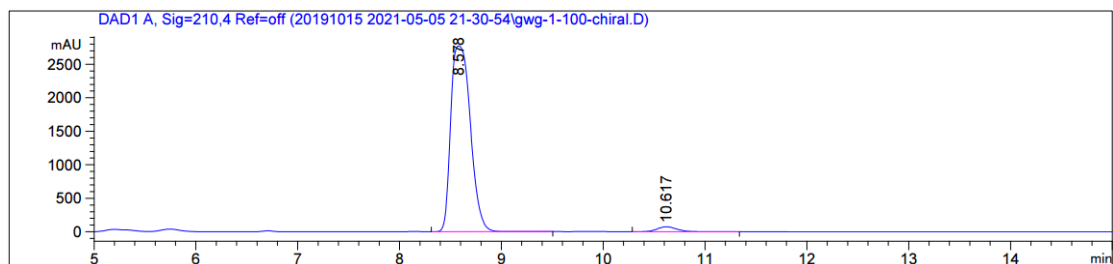

| Peak | RetTime[min] | Type | Width[min] | Area[mAu*s] | Height[mAU] | Area[%] |
|------|--------------|------|------------|-------------|-------------|---------|
| 1    | 8.578        | BV R | 0.2141     | 3.71387e4   | 2773.76392  | 97.4015 |
| 2    | 10.617       | BB   | 0.2106     | 990.78931   | 72.87672    | 2.5985  |

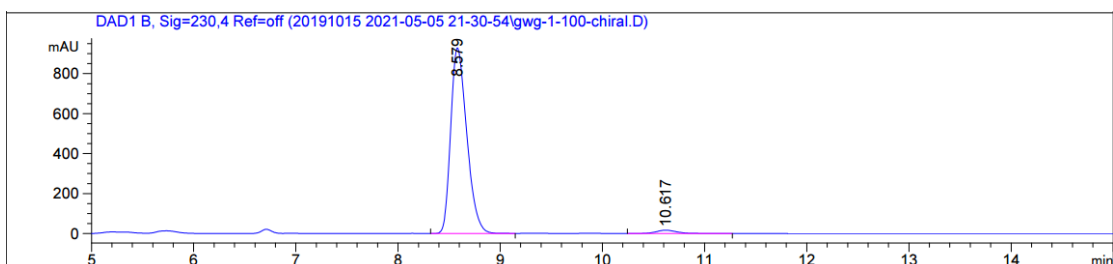

| Peak | RetTime[min] | Type | Width[min] | Area[mAu*s] | Height[mAU] | Area[%] |
|------|--------------|------|------------|-------------|-------------|---------|
| 1    | 8.579        | BB   | 0.1675     | 1.01611e4   | 929.60577   | 97.8416 |
| 2    | 10.617       | BB   | 0.2107     | 224.15475   | 16.27779    | 2.1584  |

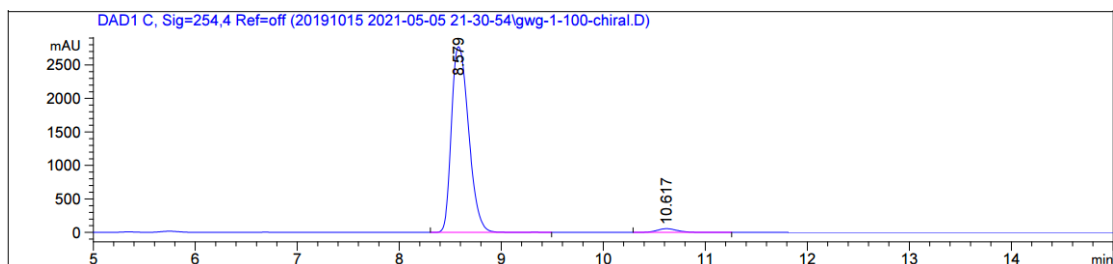

| Peak | RetTime[min] | Type | Width[min] | Area[mAu*s] | Height[mAU] | Area[%] |
|------|--------------|------|------------|-------------|-------------|---------|
| 1    | 8.579        | BV R | 0.1846     | 3.24921e4   | 2774.04077  | 97.7591 |
| 2    | 10.617       | BB   | 0.2086     | 744.81122   | 54.79323    | 2.2409  |

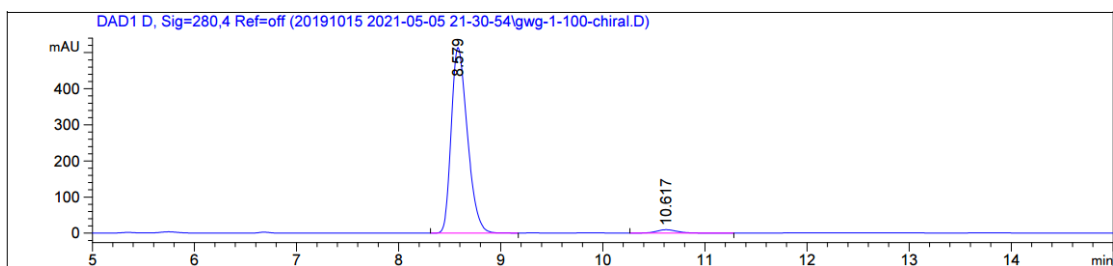

| Peak | RetTime[min] | Type | Width[min] | Area[mAu*s] | Height[mAU] | Area[%] |
|------|--------------|------|------------|-------------|-------------|---------|
| 1    | 8.579        | BB   | 0.1681     | 5650.28760  | 514.55536   | 97.8252 |
| 2    | 10.617       | BB   | 0.2115     | 125.61207   | 9.18944     | 2.1748  |

End of Report

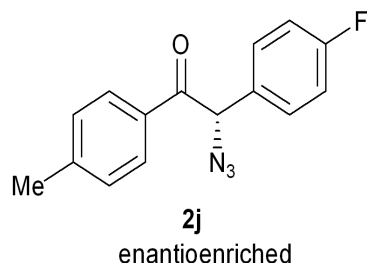

Sample Name: gwg-1-84-racemic

HPLC Condition: IC, *n*-Hexane/*i*PrOH = 90:10, 1.0 mL/min

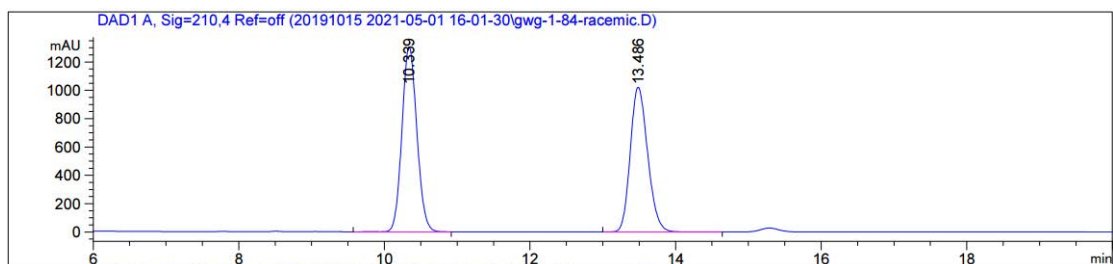

| Peak | RetTime[min] | Type | Width[min] | Area[mAu*s] | Height[mAU] | Area[%] |
|------|--------------|------|------------|-------------|-------------|---------|
| 1    | 10.339       | VB R | 0.2201     | 1.86183e4   | 1306.32776  | 52.3446 |
| 2    | 13.486       | BB   | 0.2576     | 1.69504e4   | 1021.42572  | 47.6554 |

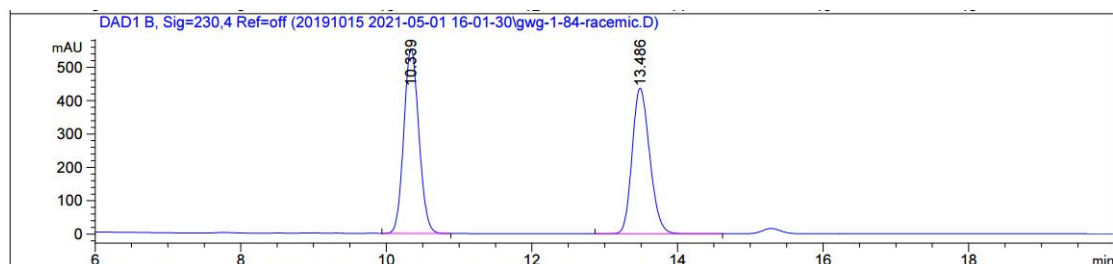

| Peak | RetTime[min] | Type | Width[min] | Area[mAu*s] | Height[mAU] | Area[%] |
|------|--------------|------|------------|-------------|-------------|---------|
| 1    | 10.339       | BB   | 0.2256     | 7961.01270  | 554.09009   | 52.1544 |
| 2    | 13.486       | BB   | 0.2615     | 7303.30811  | 435.87149   | 47.8456 |

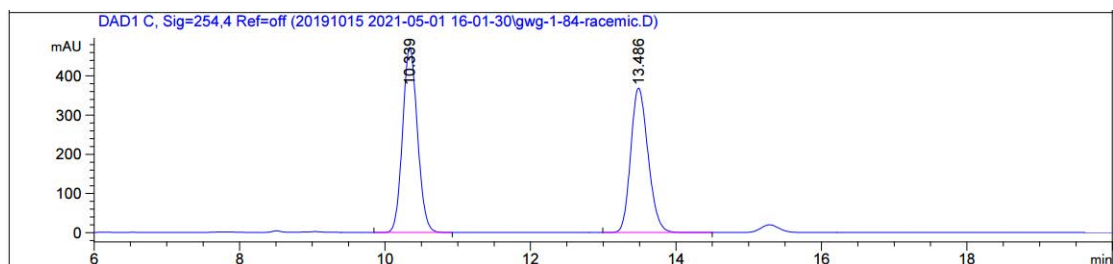

| Peak | RetTime[min] | Type | Width[min] | Area[mAu*s] | Height[mAU] | Area[%] |
|------|--------------|------|------------|-------------|-------------|---------|
| 1    | 10.339       | BB   | 0.2198     | 6713.04395  | 472.35962   | 52.3369 |
| 2    | 13.486       | BB   | 0.2575     | 6113.54346  | 368.55103   | 47.6631 |

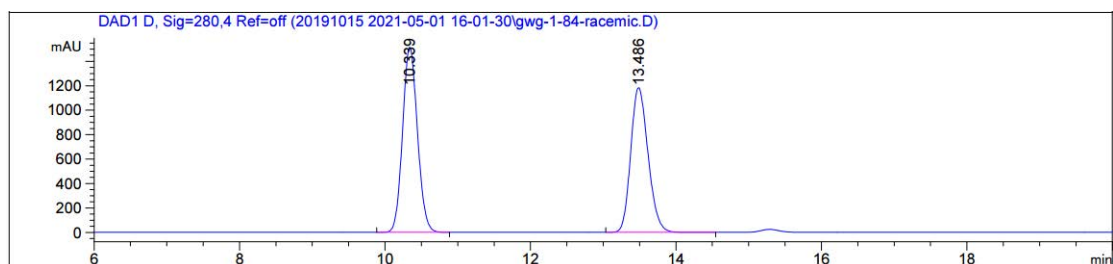

| Peak | RetTime[min] | Type | Width[min] | Area[mAu*s] | Height[mAU] | Area[%] |
|------|--------------|------|------------|-------------|-------------|---------|
| 1    | 10.339       | BB   | 0.2199     | 2.15408e4   | 1515.25928  | 52.3540 |
| 2    | 13.486       | BB   | 0.2572     | 1.96038e4   | 1183.94238  | 47.6460 |

End of Report

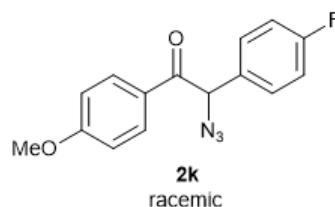

Sample Name: gwg-1-84-enantioenriched

HPLC Condition: IC, *n*-Hexane/*i*PrOH = 90:10, 1.0 mL/min

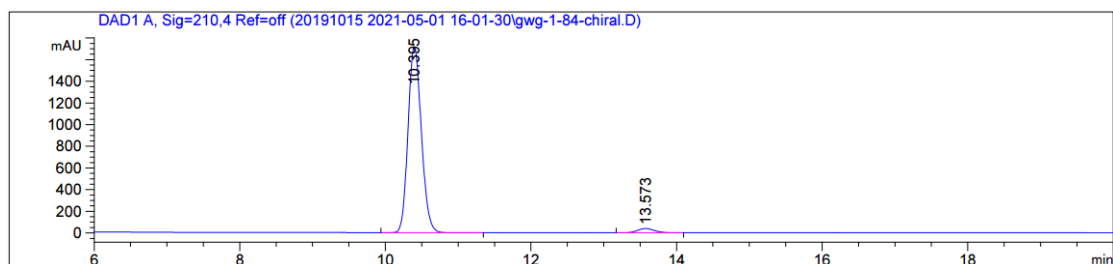

| Peak | RetTime[min] | Type | Width[min] | Area[mAu*s] | Height[mAU] | Area[%] |
|------|--------------|------|------------|-------------|-------------|---------|
| 1    | 10.395       | BB   | 0.1985     | 2.18530e4   | 1716.43066  | 97.1783 |
| 2    | 13.573       | BB   | 0.2517     | 634.52686   | 39.03366    | 2.8217  |

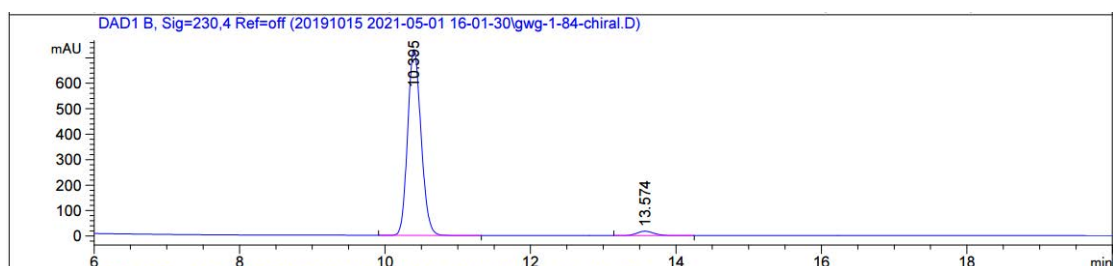

| Peak | RetTime[min] | Type | Width[min] | Area[mAu*s] | Height[mAU] | Area[%] |
|------|--------------|------|------------|-------------|-------------|---------|
| 1    | 10.395       | BB   | 0.1995     | 9352.90918  | 729.99243   | 97.0893 |
| 2    | 13.574       | BB   | 0.2520     | 280.39456   | 17.22071    | 2.9107  |

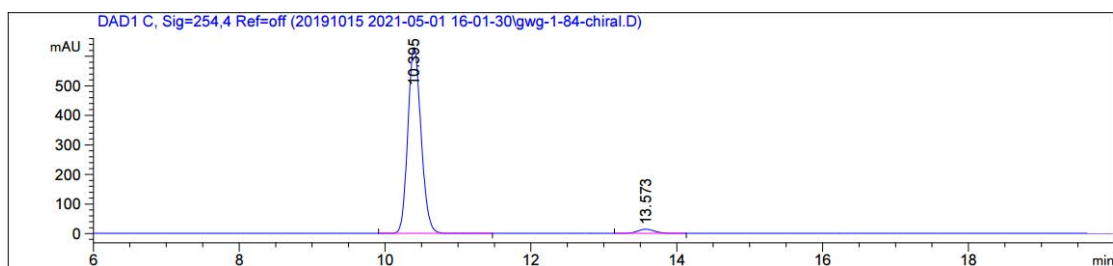

| Peak | RetTime[min] | Type | Width[min] | Area[mAu*s] | Height[mAU] | Area[%] |
|------|--------------|------|------------|-------------|-------------|---------|
| 1    | 10.395       | BB   | 0.1951     | 7938.87744  | 629.60620   | 97.1804 |
| 2    | 13.573       | BB   | 0.2521     | 230.34195   | 14.13673    | 2.8196  |

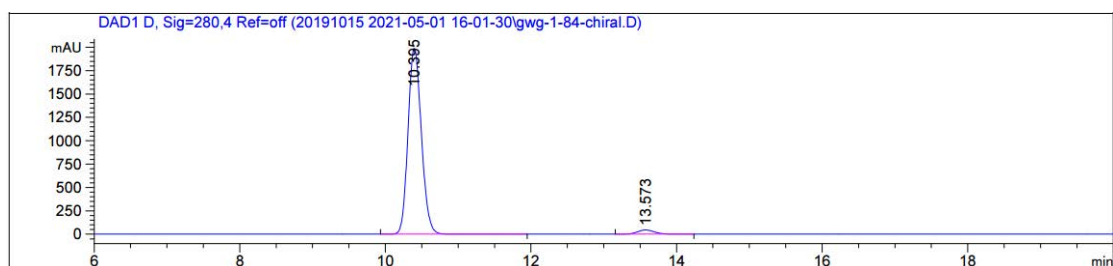

| Peak | RetTime[min] | Type | Width[min] | Area[mAu*s] | Height[mAU] | Area[%] |
|------|--------------|------|------------|-------------|-------------|---------|
| 1    | 10.395       | BB   | 0.1985     | 2.53288e4   | 1989.65771  | 97.1872 |
| 2    | 13.573       | BB   | 0.2520     | 733.06873   | 45.00504    | 2.8128  |

End of Report

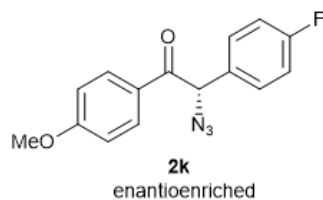

Sample Name: gwg-1-83-racemic

HPLC Condition: IC, *n*-Hexane/*i*PrOH = 97:3, 1.0 mL/min

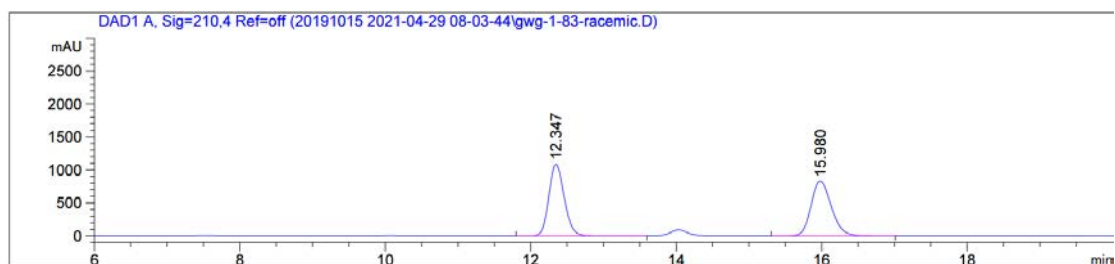

| Peak | RetTime[min] | Type | Width[min] | Area[mAu*s] | Height[mAU] | Area[%] |
|------|--------------|------|------------|-------------|-------------|---------|
| 1    | 12.347       | BB   | 0.2272     | 1.59776e4   | 1088.83655  | 49.8670 |
| 2    | 15.980       | BB   | 0.2984     | 1.60628e4   | 834.99329   | 50.1330 |

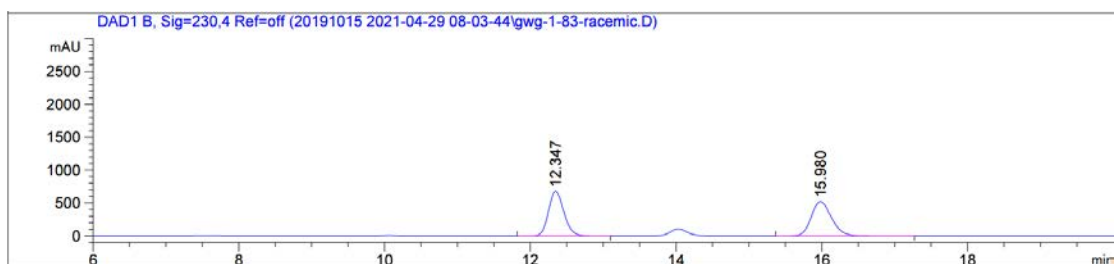

| Peak | RetTime[min] | Type | Width[min] | Area[mAu*s] | Height[mAU] | Area[%] |
|------|--------------|------|------------|-------------|-------------|---------|
| 1    | 12.347       | BB   | 0.2269     | 9910.62598  | 676.71509   | 49.7790 |
| 2    | 15.980       | BB   | 0.2989     | 9998.62891  | 518.77405   | 50.2210 |

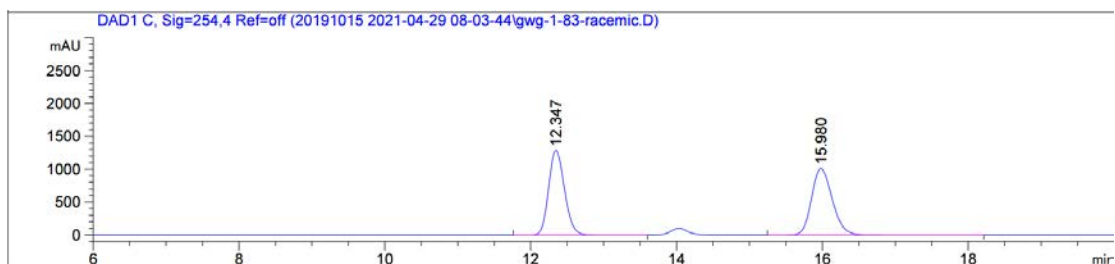

| Peak | RetTime[min] | Type | Width[min] | Area[mAu*s] | Height[mAU] | Area[%] |
|------|--------------|------|------------|-------------|-------------|---------|
| 1    | 12.347       | BB   | 0.2359     | 1.93601e4   | 1284.25586  | 49.4009 |
| 2    | 15.980       | BB   | 0.3055     | 1.98296e4   | 1007.84265  | 50.5991 |

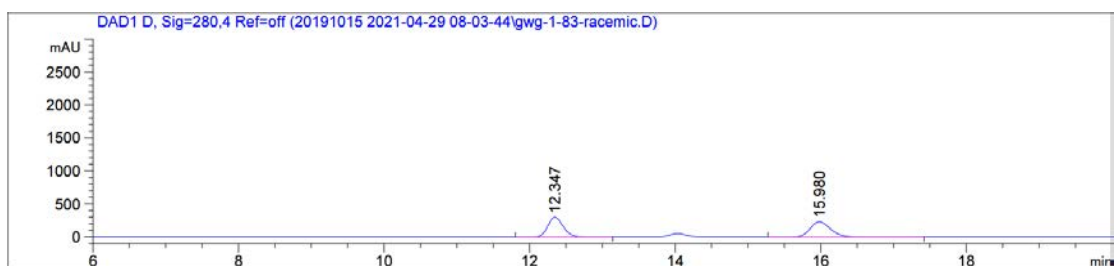

| Peak | RetTime[min] | Type | Width[min] | Area[mAu*s] | Height[mAU] | Area[%] |
|------|--------------|------|------------|-------------|-------------|---------|
| 1    | 12.347       | BB   | 0.2268     | 4367.92432  | 298.31885   | 49.7459 |
| 2    | 15.980       | BB   | 0.2991     | 4412.54297  | 228.68457   | 50.2541 |

End of Report

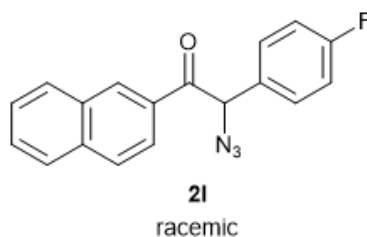

Sample Name: gwg-1-83-enantioenriched

HPLC Condition: IC, *n*-Hexane/*i*PrOH = 97:3, 1.0 mL/min

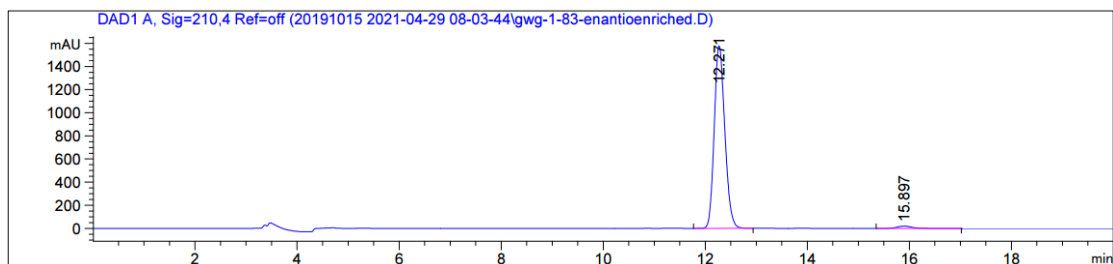

| Peak | RetTime[min] | Type | Width[min] | Area[mAu*s] | Height[mAU] | Area[%] |
|------|--------------|------|------------|-------------|-------------|---------|
| 1    | 12.271       | BB   | 0.2242     | 2.27529e4   | 1577.95251  | 98.2427 |
| 2    | 15.897       | BB   | 0.3055     | 406.99643   | 20.33627    | 1.7573  |

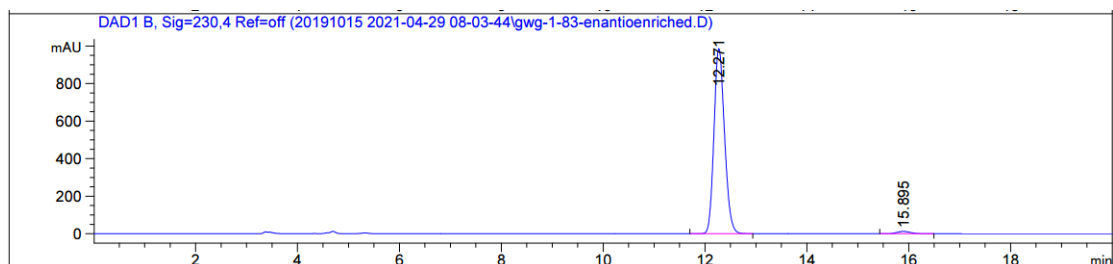

| Peak | RetTime[min] | Type | Width[min] | Area[mAu*s] | Height[mAU] | Area[%] |
|------|--------------|------|------------|-------------|-------------|---------|
| 1    | 12.271       | BB   | 0.2216     | 1.41702e4   | 986.48230   | 98.3779 |
| 2    | 15.895       | BB   | 0.2940     | 233.63748   | 12.39243    | 1.6221  |

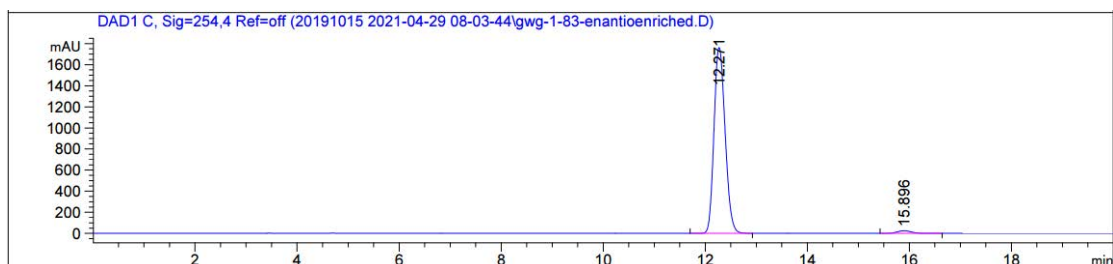

| Peak | RetTime[min] | Type | Width[min] | Area[mAu*s] | Height[mAU] | Area[%] |
|------|--------------|------|------------|-------------|-------------|---------|
| 1    | 12.271       | BB   | 0.2384     | 2.66524e4   | 1762.35132  | 98.2216 |
| 2    | 15.896       | BB   | 0.2922     | 482.57474   | 25.56369    | 1.7784  |

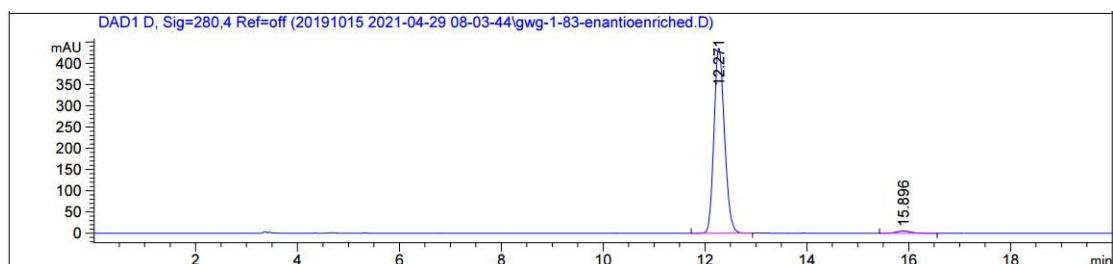

| Peak | RetTime[min] | Type | Width[min] | Area[mAu*s] | Height[mAU] | Area[%] |
|------|--------------|------|------------|-------------|-------------|---------|
| 1    | 12.271       | BB   | 0.2214     | 6245.13623  | 435.26337   | 98.3793 |
| 2    | 15.896       | BB   | 0.2898     | 102.87933   | 5.46074     | 1.6207  |

End of Report

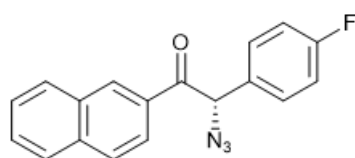

21

enantioenriched

S-210

Sample Name: gwg-2-26-racemic

HPLC Condition: ODH, *n*-Hexane/*i*PrOH = 99:1, 1.0 mL/min

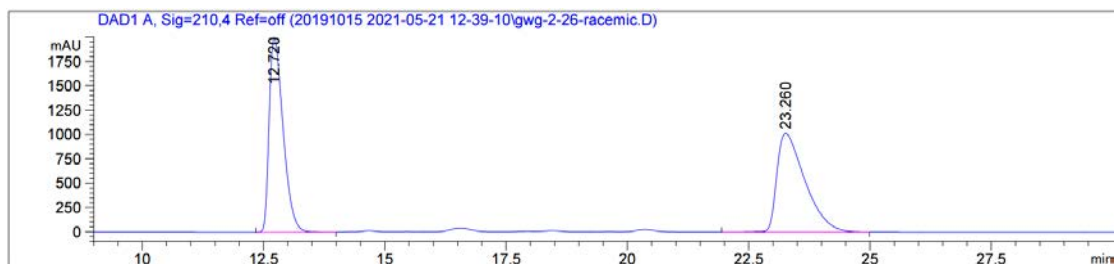

| Peak | RetTime[min] | Type | Width[min] | Area[mAu*s] | Height[mAU] | Area[%] |
|------|--------------|------|------------|-------------|-------------|---------|
| 1    | 12.720       | BB   | 0.3072     | 3.98587e4   | 1994.03394  | 49.4495 |
| 2    | 23.260       | BB   | 0.6089     | 4.07461e4   | 1013.77081  | 50.5505 |

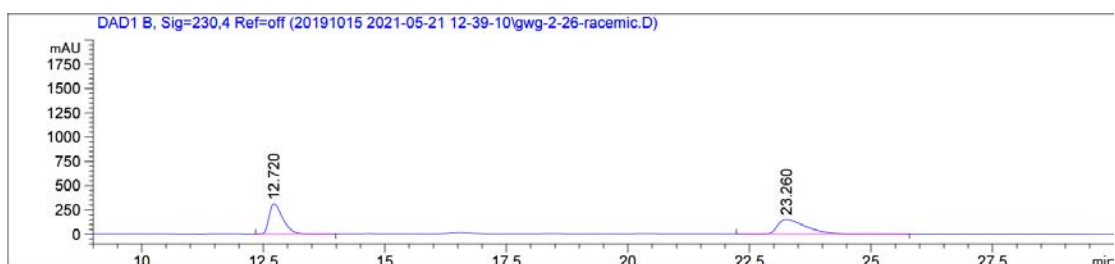

| Peak | RetTime[min] | Type | Width[min] | Area[mAu*s] | Height[mAU] | Area[%] |
|------|--------------|------|------------|-------------|-------------|---------|
| 1    | 12.720       | BB   | 0.3000     | 6075.55078  | 310.85889   | 49.9846 |
| 2    | 23.260       | BB   | 0.6087     | 6079.30469  | 151.32632   | 50.0154 |

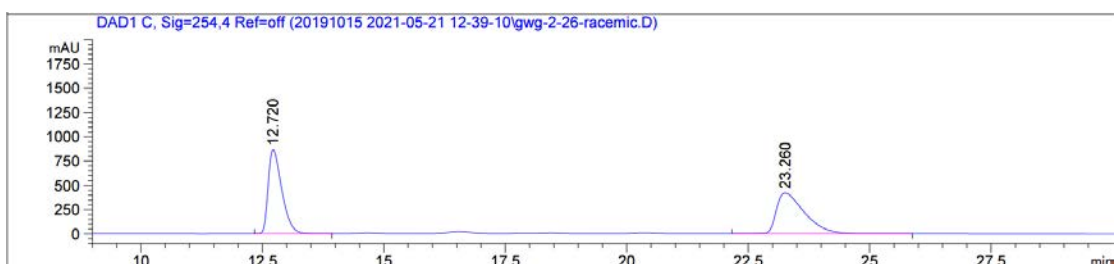

| Peak | RetTime[min] | Type | Width[min] | Area[mAu*s] | Height[mAU] | Area[%] |
|------|--------------|------|------------|-------------|-------------|---------|
| 1    | 12.720       | BB   | 0.2991     | 1.68637e4   | 866.25348   | 49.9803 |
| 2    | 23.260       | BB   | 0.6056     | 1.68771e4   | 421.09863   | 50.0197 |

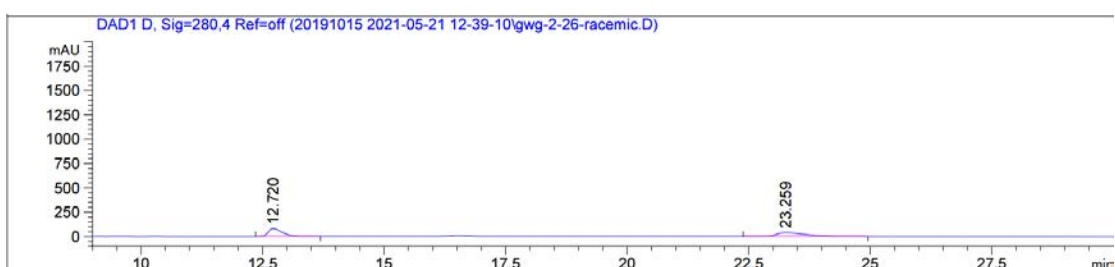

| Peak | RetTime[min] | Type | Width[min] | Area[mAu*s] | Height[mAU] | Area[%] |
|------|--------------|------|------------|-------------|-------------|---------|
| 1    | 12.720       | BB   | 0.3007     | 1573.90833  | 80.30427    | 49.9183 |
| 2    | 23.259       | BB   | 0.6023     | 1579.05750  | 39.33966    | 50.0817 |

End of Report

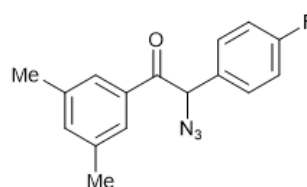

S-

2m  
racemic

Sample Name: gwg-2-26-enantioenriched

HPLC Condition: ODH, *n*-Hexane/*i*PrOH = 99:1, 1.0 mL/min

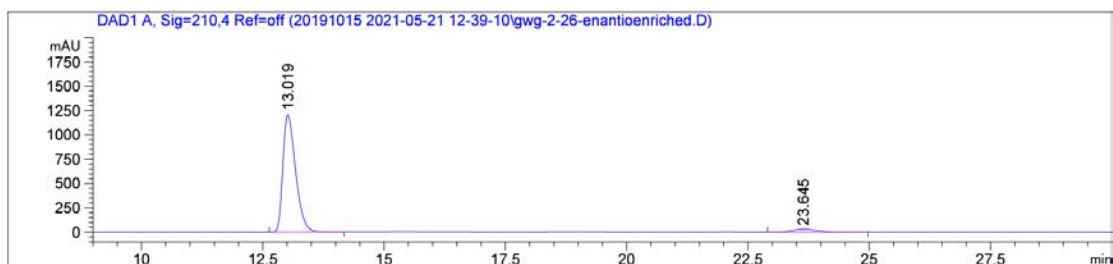

| Peak | RetTime[min] | Type | Width[min] | Area[mAu*s] | Height[mAU] | Area[%] |
|------|--------------|------|------------|-------------|-------------|---------|
| 1    | 13.019       | BB   | 0.2799     | 2.19037e4   | 1206.11572  | 95.5716 |
| 2    | 23.645       | BB   | 0.5330     | 1014.93628  | 29.24023    | 4.4284  |

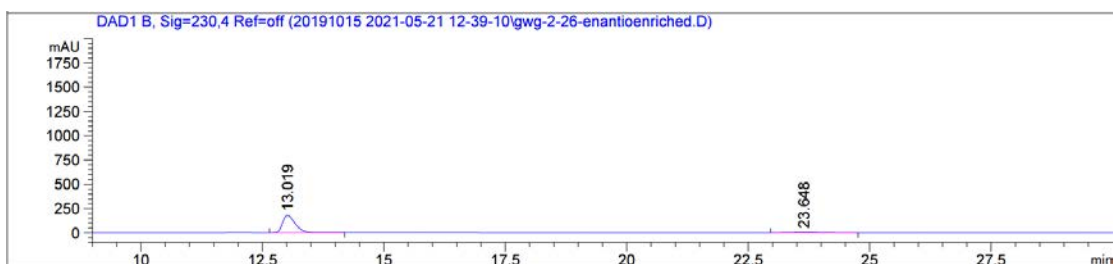

| Peak | RetTime[min] | Type | Width[min] | Area[mAu*s] | Height[mAU] | Area[%] |
|------|--------------|------|------------|-------------|-------------|---------|
| 1    | 13.019       | BB   | 0.2797     | 3275.80103  | 180.51335   | 95.5904 |
| 2    | 23.648       | BB   | 0.5104     | 151.11218   | 4.35972     | 4.4096  |

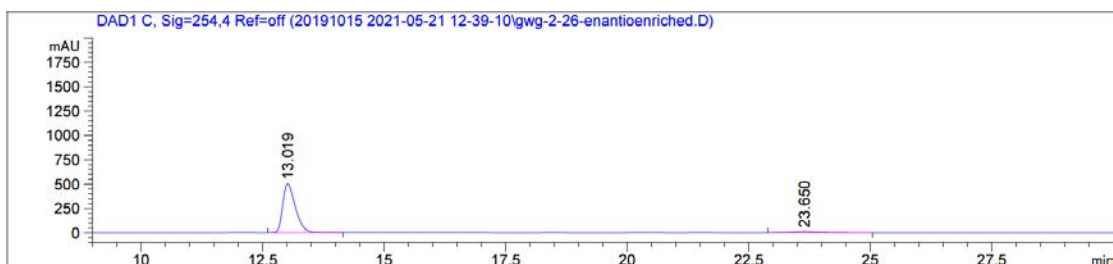

| Peak | RetTime[min] | Type | Width[min] | Area[mAu*s] | Height[mAU] | Area[%] |
|------|--------------|------|------------|-------------|-------------|---------|
| 1    | 13.019       | BB   | 0.2788     | 9077.93652  | 502.49368   | 95.5686 |
| 2    | 23.650       | BB   | 0.5342     | 420.93219   | 12.08856    | 4.4314  |

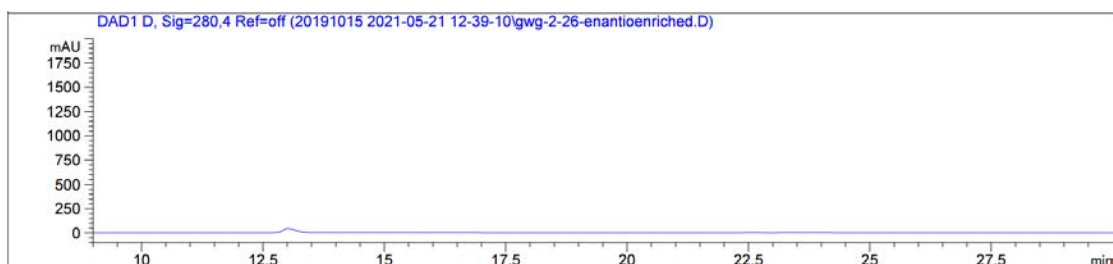

End of Report

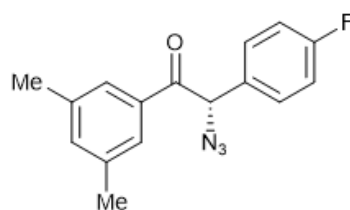

2m

enantioenriched



Sample Name: gwg-2-84-racemic

HPLC Condition: IC, *n*-Hexane/*i*PrOH = 99:1, 1.0 mL/min

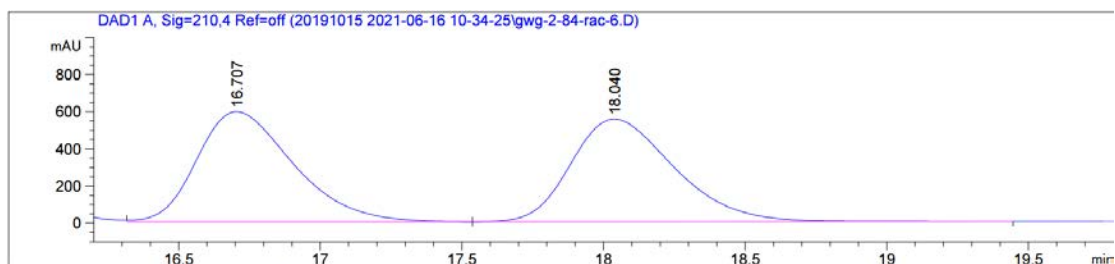

| Peak | RetTime[min] | Type | Width[min] | Area[mAu*s] | Height[mAU] | Area[%] |
|------|--------------|------|------------|-------------|-------------|---------|
| 1    | 16.707       | VB   | 0.3635     | 1.39926e4   | 592.47137   | 50.0315 |
| 2    | 18.040       | BB   | 0.3915     | 1.39750e4   | 551.69586   | 49.9685 |

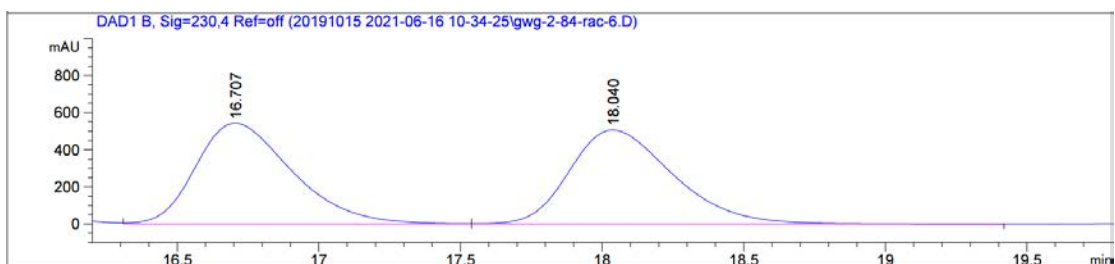

| Peak | RetTime[min] | Type | Width[min] | Area[mAu*s] | Height[mAU] | Area[%] |
|------|--------------|------|------------|-------------|-------------|---------|
| 1    | 16.707       | VV   | 0.3644     | 1.28769e4   | 543.43390   | 49.9632 |
| 2    | 18.040       | VB   | 0.3929     | 1.28959e4   | 506.68484   | 50.0368 |

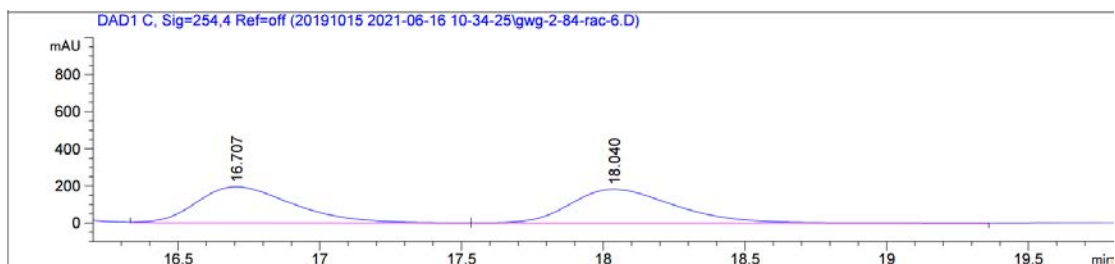

| Peak | RetTime[min] | Type | Width[min] | Area[mAu*s] | Height[mAU] | Area[%] |
|------|--------------|------|------------|-------------|-------------|---------|
| 1    | 16.707       | VV   | 0.3638     | 4592.26074  | 194.25298   | 50.0039 |
| 2    | 18.040       | VB   | 0.3919     | 4591.54150  | 181.02127   | 49.9961 |

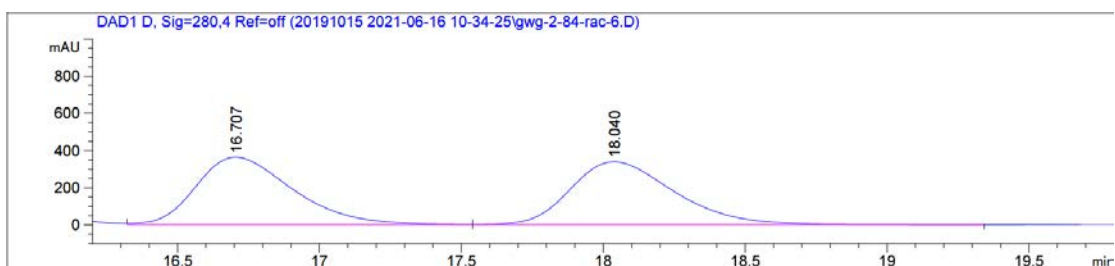

| Peak | RetTime[min] | Type | Width[min] | Area[mAu*s] | Height[mAU] | Area[%] |
|------|--------------|------|------------|-------------|-------------|---------|
| 1    | 16.707       | VV   | 0.3640     | 8568.51758  | 362.23358   | 50.0423 |
| 2    | 18.040       | VB   | 0.3917     | 8554.02832  | 337.47238   | 49.9577 |

End of Report

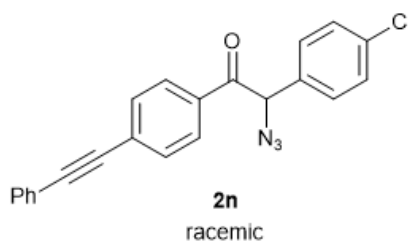

Sample Name: gwg-2-84-enantioenriched

HPLC Condition: IC, *n*-Hexane/*i*PrOH = 99:1, 1.0 mL/min

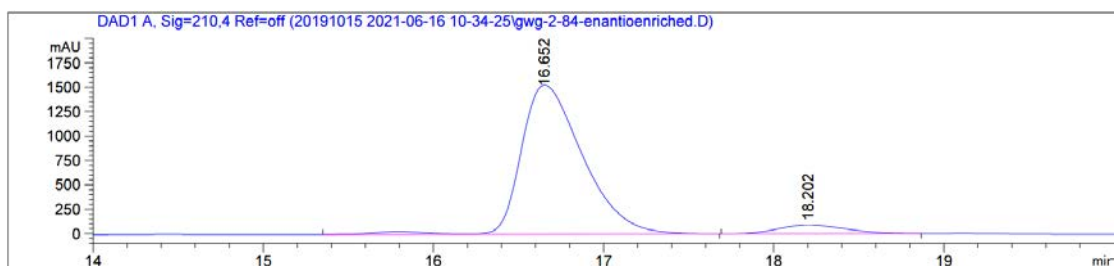

| Peak | RetTime[min] | Type | Width[min] | Area[mAu*s] | Height[mAU] | Area[%] |
|------|--------------|------|------------|-------------|-------------|---------|
| 1    | 16.652       | VB R | 0.3830     | 3.83610e4   | 1527.83594  | 93.9066 |
| 2    | 18.202       | BB   | 0.4167     | 2489.15186  | 92.27799    | 6.0934  |

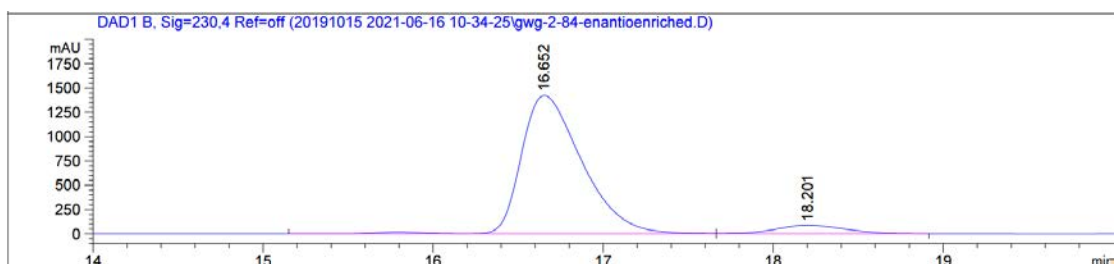

| Peak | RetTime[min] | Type | Width[min] | Area[mAu*s] | Height[mAU] | Area[%] |
|------|--------------|------|------------|-------------|-------------|---------|
| 1    | 16.652       | VV R | 0.3789     | 3.53668e4   | 1423.77454  | 93.4617 |
| 2    | 18.201       | VB   | 0.4475     | 2474.15039  | 88.68900    | 6.5383  |

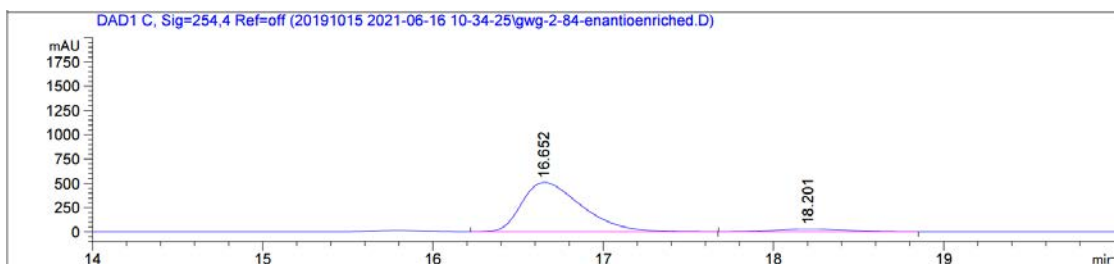

| Peak | RetTime[min] | Type | Width[min] | Area[mAu*s] | Height[mAU] | Area[%] |
|------|--------------|------|------------|-------------|-------------|---------|
| 1    | 16.652       | VB   | 0.3753     | 1.24761e4   | 510.12561   | 93.6930 |
| 2    | 18.201       | BB   | 0.4409     | 839.83295   | 31.11443    | 6.3070  |

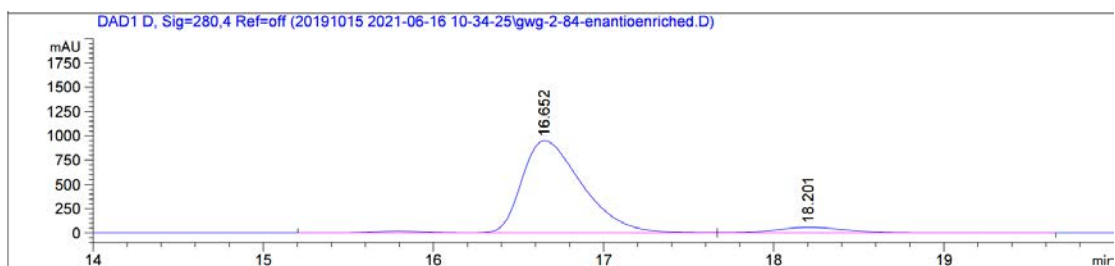

| Peak | RetTime[min] | Type | Width[min] | Area[mAu*s] | Height[mAU] | Area[%] |
|------|--------------|------|------------|-------------|-------------|---------|
| 1    | 16.652       | VV R | 0.3792     | 2.38199e4   | 951.67157   | 93.1087 |
| 2    | 18.201       | VB   | 0.4612     | 1762.98303  | 60.28823    | 6.8913  |

End of Report

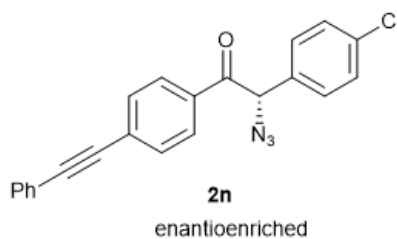

S-214

Sample Name: gwg-1-95-racemic

HPLC Condition: ODH, *n*-Hexane/*i*PrOH = 95:5, 1.0 mL/min

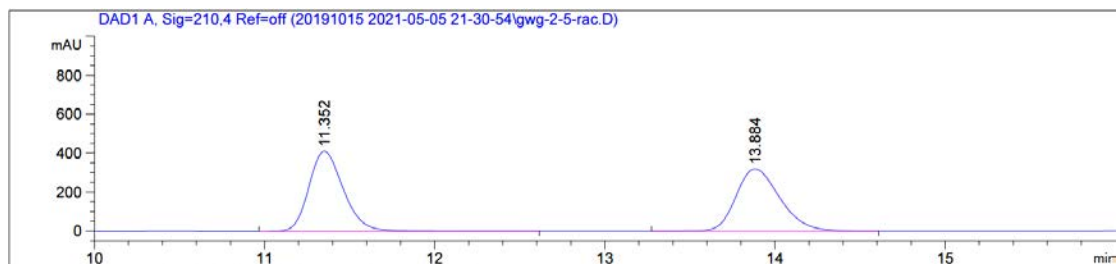

| Peak | RetTime[min] | Type | Width[min] | Area[mAu*s] | Height[mAU] | Area[%] |
|------|--------------|------|------------|-------------|-------------|---------|
| 1    | 11.352       | BB   | 0.2177     | 5750.46387  | 409.82306   | 50.1876 |
| 2    | 13.884       | BB   | 0.2762     | 5707.47656  | 319.77087   | 49.8124 |

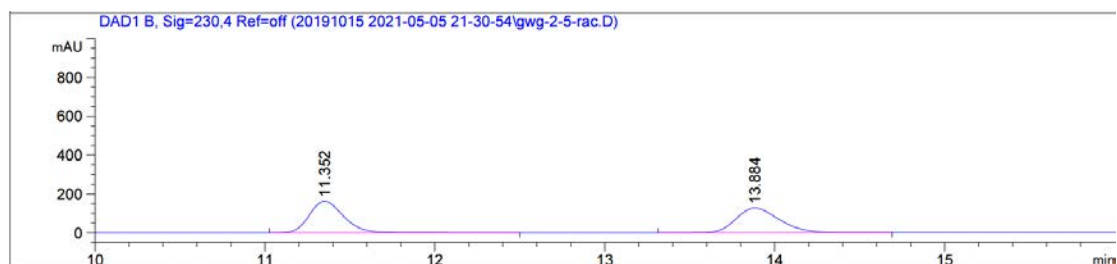

| Peak | RetTime[min] | Type | Width[min] | Area[mAu*s] | Height[mAU] | Area[%] |
|------|--------------|------|------------|-------------|-------------|---------|
| 1    | 11.352       | BB   | 0.2178     | 2286.07813  | 162.79077   | 50.2914 |
| 2    | 13.884       | BB   | 0.2758     | 2259.58838  | 126.86114   | 49.7086 |

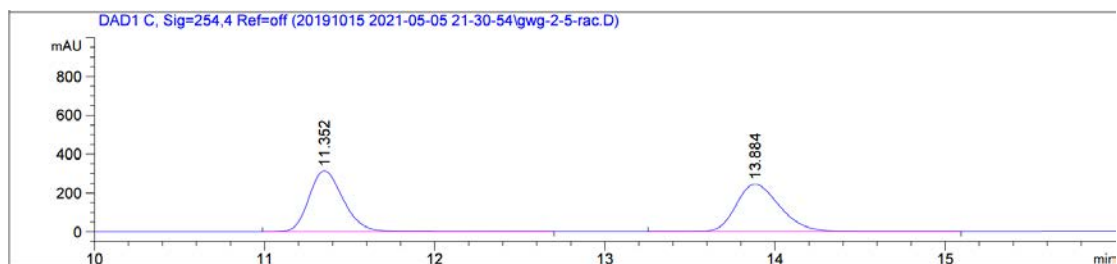

| Peak | RetTime[min] | Type | Width[min] | Area[mAu*s] | Height[mAU] | Area[%] |
|------|--------------|------|------------|-------------|-------------|---------|
| 1    | 11.352       | BB   | 0.2177     | 4411.17139  | 314.37024   | 50.2565 |
| 2    | 13.884       | BB   | 0.2760     | 4366.14648  | 244.86259   | 49.7435 |

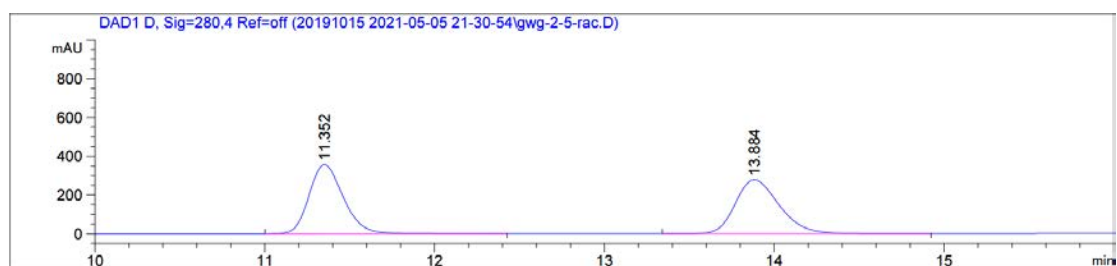

| Peak | RetTime[min] | Type | Width[min] | Area[mAu*s] | Height[mAU] | Area[%] |
|------|--------------|------|------------|-------------|-------------|---------|
| 1    | 11.352       | BB   | 0.2150     | 4971.68701  | 355.79819   | 50.1780 |
| 2    | 13.884       | BB   | 0.2755     | 4936.41260  | 277.55780   | 49.8220 |

End of Report

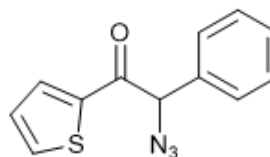

**2o**  
racemic

Sample Name: gwg-1-95-enantioenriched

HPLC Condition: ODH, *n*-Hexane/*i*PrOH = 95:5, 1.0 mL/min

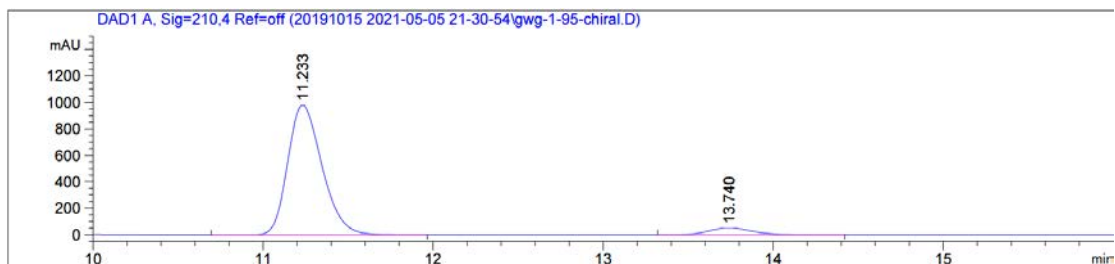

| Peak | RetTime[min] | Type | Width[min] | Area[mAu*s] | Height[mAU] | Area[%] |
|------|--------------|------|------------|-------------|-------------|---------|
| 1    | 11.233       | BB   | 0.2167     | 1.36727e4   | 980.37939   | 93.9481 |
| 2    | 13.740       | BB   | 0.2640     | 880.76270   | 51.90536    | 6.0519  |

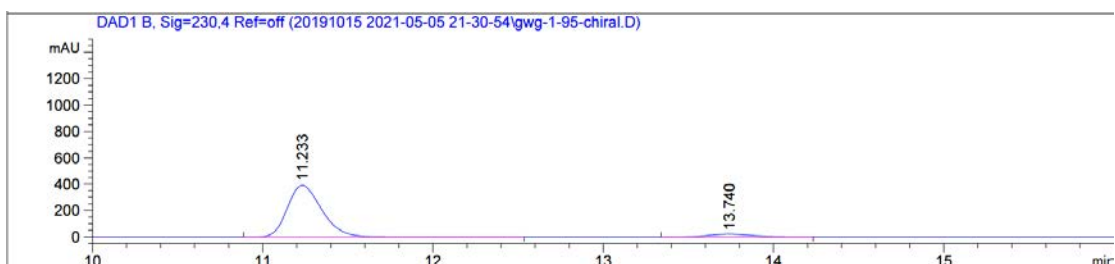

| Peak | RetTime[min] | Type | Width[min] | Area[mAu*s] | Height[mAU] | Area[%] |
|------|--------------|------|------------|-------------|-------------|---------|
| 1    | 11.233       | BB   | 0.2170     | 5468.70752  | 391.44571   | 94.0680 |
| 2    | 13.740       | BB   | 0.2623     | 344.86127   | 20.49823    | 5.9320  |

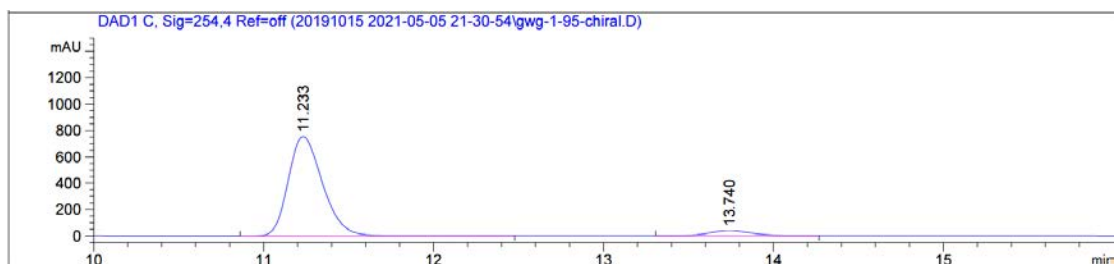

| Peak | RetTime[min] | Type | Width[min] | Area[mAu*s] | Height[mAU] | Area[%] |
|------|--------------|------|------------|-------------|-------------|---------|
| 1    | 11.233       | BB   | 0.2169     | 1.05350e4   | 754.38928   | 94.0079 |
| 2    | 13.740       | BB   | 0.2631     | 671.50848   | 39.74366    | 5.9921  |

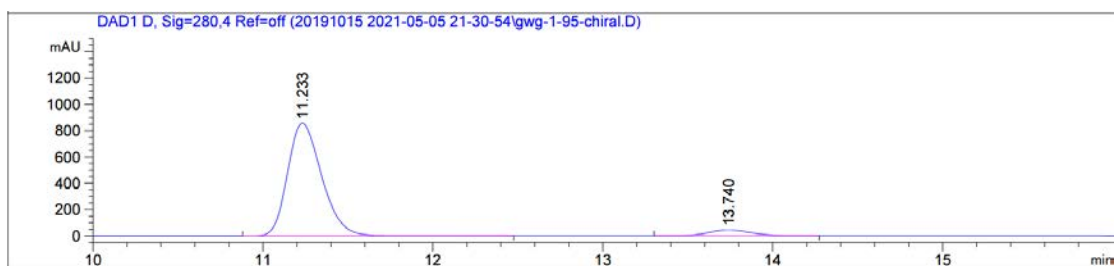

| Peak | RetTime[min] | Type | Width[min] | Area[mAu*s] | Height[mAU] | Area[%] |
|------|--------------|------|------------|-------------|-------------|---------|
| 1    | 11.233       | BB   | 0.2166     | 1.19407e4   | 856.66187   | 94.0045 |
| 2    | 13.740       | BB   | 0.2634     | 761.56921   | 45.01426    | 5.9955  |

End of Report

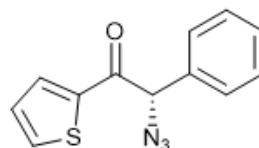

2o

enantioenriched

Sample Name: gwg-1-94-racemic

HPLC Condition: ODH, *n*-Hexane/*i*PrOH = 95:5, 1.0 mL/min

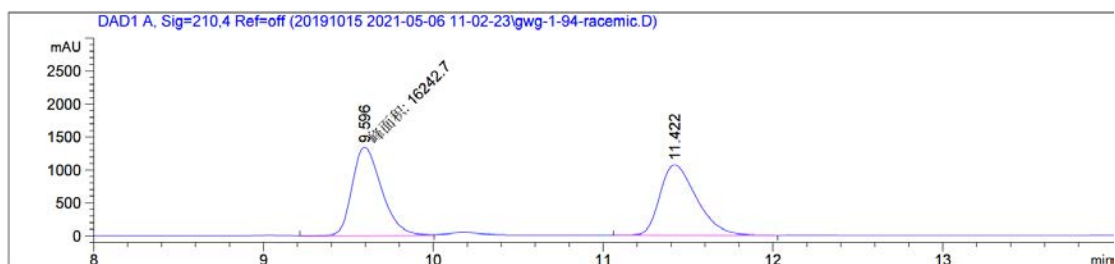

| Peak | RetTime[min] | Type | Width[min] | Area[mAu*s] | Height[mAU] | Area[%] |
|------|--------------|------|------------|-------------|-------------|---------|
| 1    | 9.596        | MM   | 0.2015     | 1.62427e4   | 1343.46545  | 50.4782 |
| 2    | 11.422       | BB   | 0.2301     | 1.59349e4   | 1067.92371  | 49.5218 |

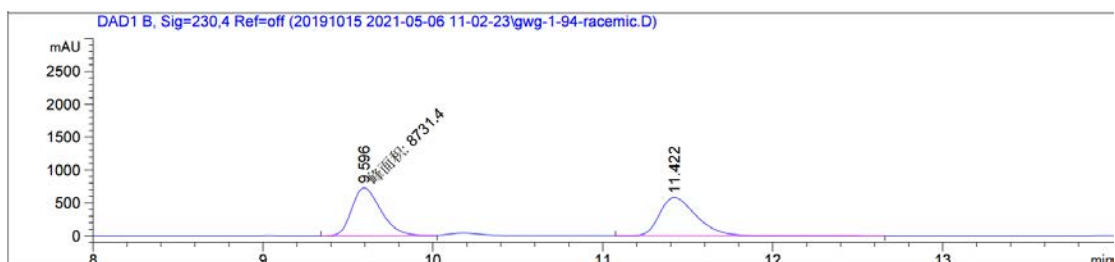

| Peak | RetTime[min] | Type | Width[min] | Area[mAu*s] | Height[mAU] | Area[%] |
|------|--------------|------|------------|-------------|-------------|---------|
| 1    | 9.596        | MM   | 0.1990     | 8731.40234  | 731.17902   | 50.1956 |
| 2    | 11.422       | BV R | 0.2297     | 8663.35449  | 579.43475   | 49.8044 |

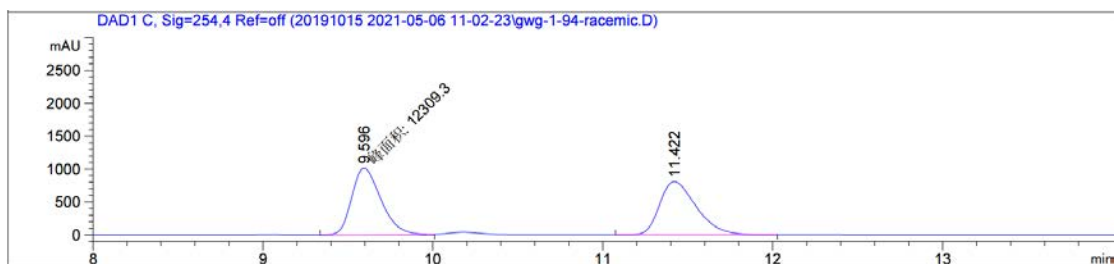

| Peak | RetTime[min] | Type | Width[min] | Area[mAu*s] | Height[mAU] | Area[%] |
|------|--------------|------|------------|-------------|-------------|---------|
| 1    | 9.596        | MM   | 0.2013     | 1.23093e4   | 1019.26355  | 50.5376 |
| 2    | 11.422       | BB   | 0.2301     | 1.20474e4   | 807.33246   | 49.4624 |

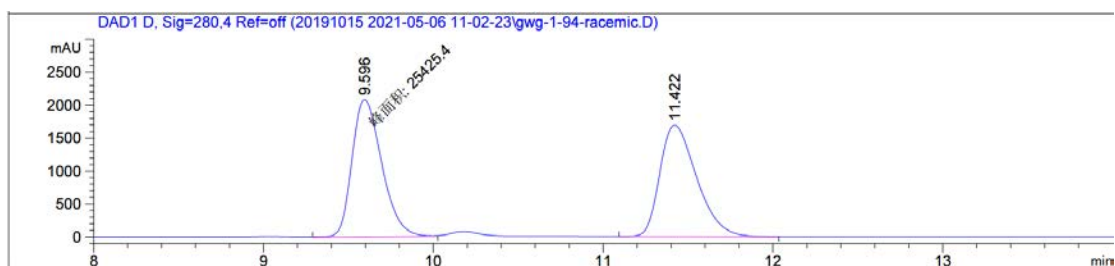

| Peak | RetTime[min] | Type | Width[min] | Area[mAu*s] | Height[mAU] | Area[%] |
|------|--------------|------|------------|-------------|-------------|---------|
| 1    | 9.596        | MM   | 0.2034     | 2.54254e4   | 2083.47119  | 50.0346 |
| 2    | 11.422       | BB   | 0.2333     | 2.53902e4   | 1690.00122  | 49.9654 |

End of Report

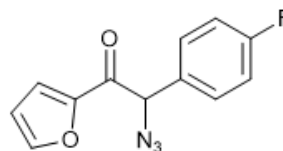

2p

racemic

S-211

Sample Name: gwg-1-94-enantioenriched

HPLC Condition: ODH, *n*-Hexane/*i*PrOH = 95:5, 1.0 mL/min

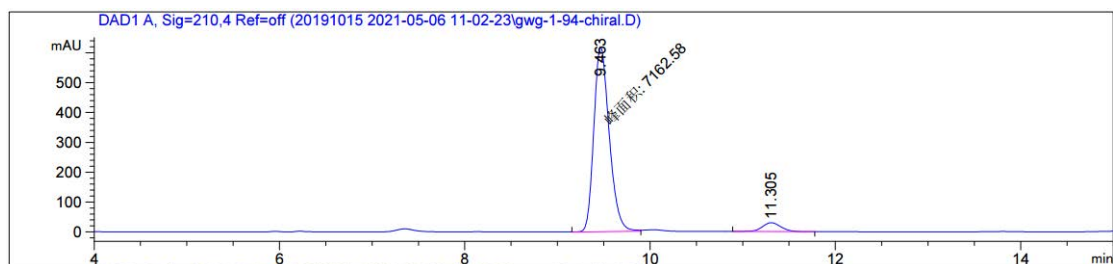

| Peak | RetTime[min] | Type | Width[min] | Area[mAu*s] | Height[mAU] | Area[%] |
|------|--------------|------|------------|-------------|-------------|---------|
| 1    | 9.463        | MM   | 0.1926     | 7162.58203  | 619.95569   | 94.6258 |
| 2    | 11.305       | BB   | 0.2132     | 406.79056   | 29.44935    | 5.3742  |

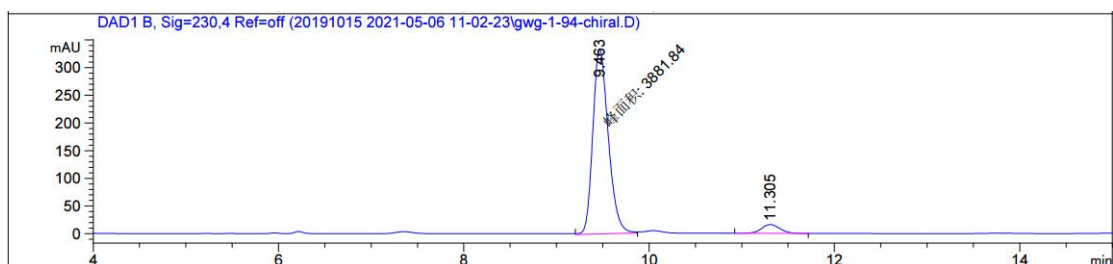

| Peak | RetTime[min] | Type | Width[min] | Area[mAu*s] | Height[mAU] | Area[%] |
|------|--------------|------|------------|-------------|-------------|---------|
| 1    | 9.463        | MM   | 0.1933     | 3881.84277  | 334.69803   | 94.6896 |
| 2    | 11.305       | BB   | 0.2144     | 217.70306   | 15.83468    | 5.3104  |

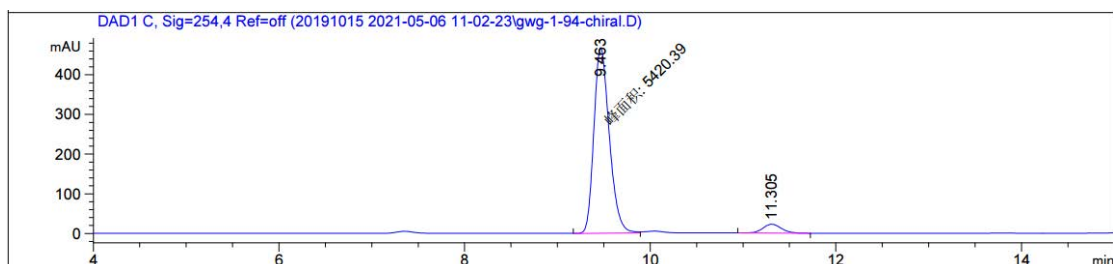

| Peak | RetTime[min] | Type | Width[min] | Area[mAu*s] | Height[mAU] | Area[%] |
|------|--------------|------|------------|-------------|-------------|---------|
| 1    | 9.463        | MM   | 0.1927     | 5420.38721  | 468.70099   | 94.6717 |
| 2    | 11.305       | BB   | 0.2119     | 305.07013   | 22.26280    | 5.3283  |

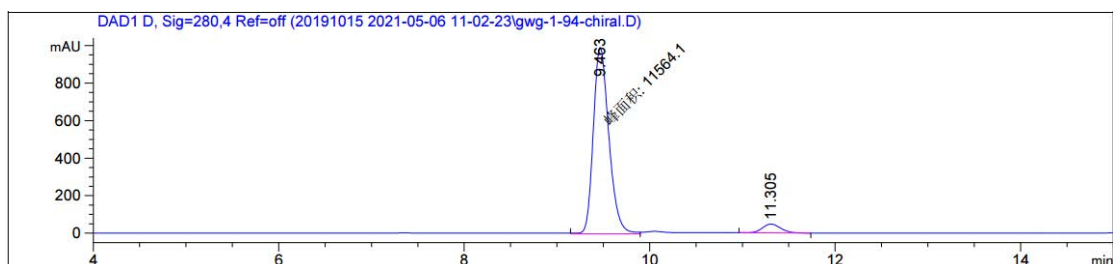

| Peak | RetTime[min] | Type | Width[min] | Area[mAu*s] | Height[mAU] | Area[%] |
|------|--------------|------|------------|-------------|-------------|---------|
| 1    | 9.463        | MM   | 0.1941     | 1.15641e4   | 993.20239   | 94.7434 |
| 2    | 11.305       | BB   | 0.2115     | 641.60291   | 46.93247    | 5.2566  |

End of Report

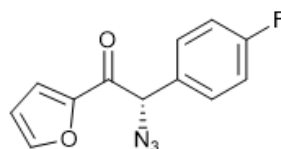

2p

enantioenriched

Sample Name: gwg-1-43

HPLC Condition: IC, *n*-Hexane/*i*PrOH = 97/3, 1.0 mL/min

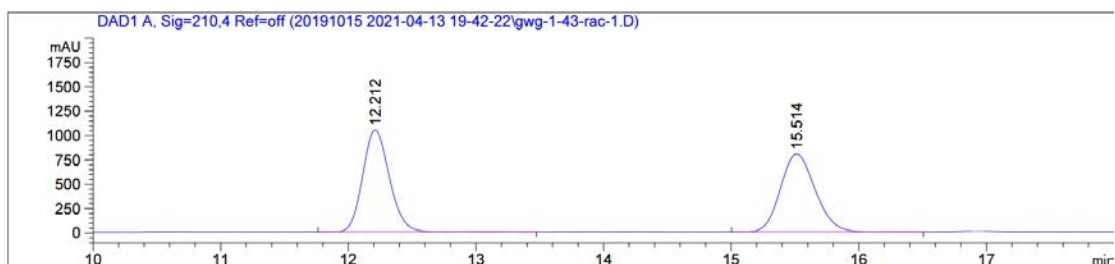

| Peak | RetTime[min] | Type | Width[min] | Area[mAu*s] | Height[mAU] | Area[%] |
|------|--------------|------|------------|-------------|-------------|---------|
| 1    | 12.212       | BV R | 0.2257     | 1.53946e4   | 1048.64185  | 50.3487 |
| 2    | 15.514       | BB   | 0.2950     | 1.51814e4   | 801.47662   | 49.6513 |

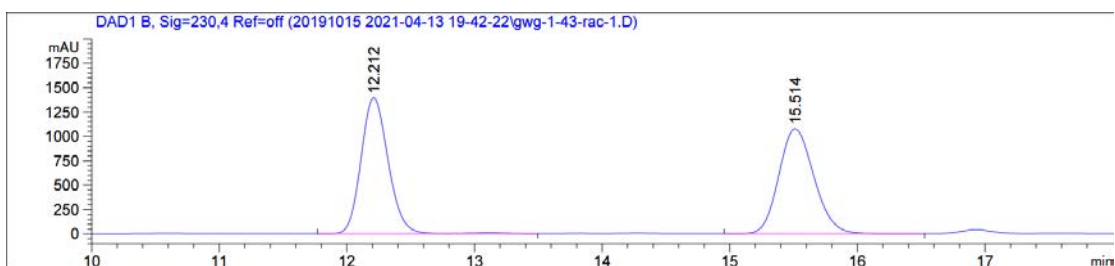

| Peak | RetTime[min] | Type | Width[min] | Area[mAu*s] | Height[mAU] | Area[%] |
|------|--------------|------|------------|-------------|-------------|---------|
| 1    | 12.212       | BV R | 0.2276     | 2.06605e4   | 1393.35242  | 50.0805 |
| 2    | 15.514       | BB   | 0.2971     | 2.05941e4   | 1076.97510  | 49.9195 |

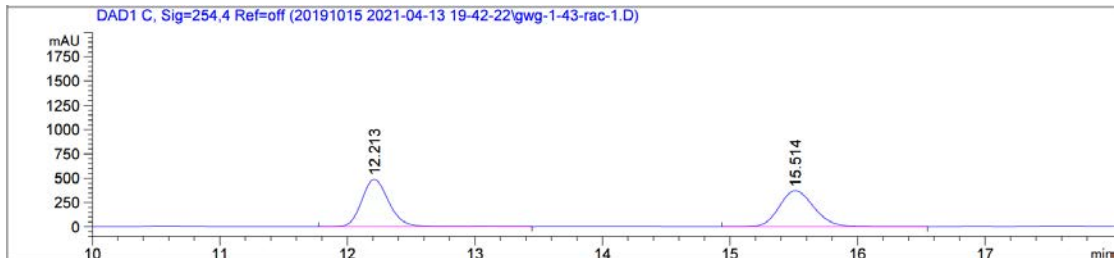

| Peak | RetTime[min] | Type | Width[min] | Area[mAu*s] | Height[mAU] | Area[%] |
|------|--------------|------|------------|-------------|-------------|---------|
| 1    | 12.213       | BV R | 0.2275     | 7246.02197  | 488.16440   | 50.6952 |
| 2    | 15.514       | BB   | 0.2952     | 7047.29541  | 371.72296   | 49.3048 |

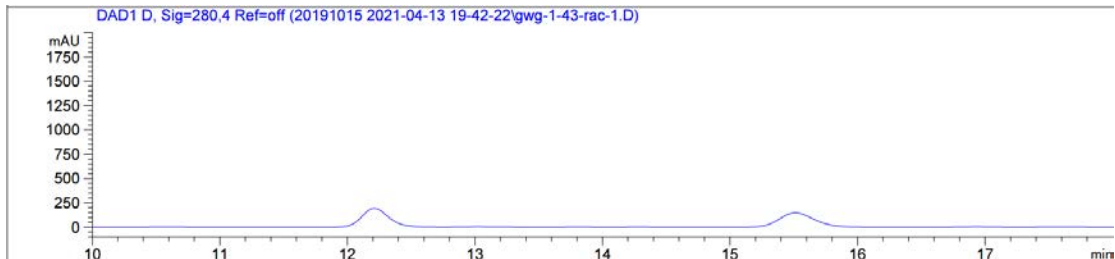

End of Report

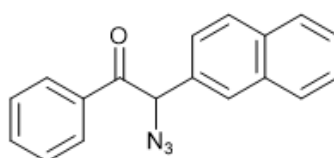

2q  
racemic

Sample Name: gwg-1-43-enantioenriched

HPLC Condition: IC, *n*-Hexane/*i*PrOH = 97:3, 1.0 mL/min

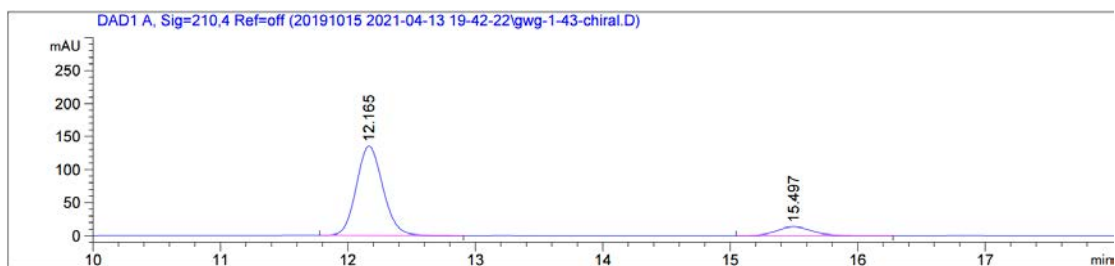

| Peak | RetTime[min] | Type | Width[min] | Area[mAu*s] | Height[mAU] | Area[%] |
|------|--------------|------|------------|-------------|-------------|---------|
| 1    | 12.165       | BB   | 0.2248     | 1955.87842  | 135.14792   | 88.0918 |
| 2    | 15.497       | BB   | 0.2931     | 264.39392   | 13.82425    | 11.9082 |

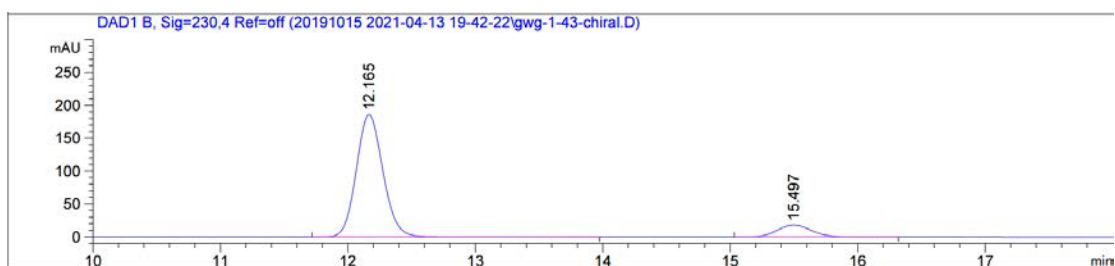

| Peak | RetTime[min] | Type | Width[min] | Area[mAu*s] | Height[mAU] | Area[%] |
|------|--------------|------|------------|-------------|-------------|---------|
| 1    | 12.165       | BB   | 0.2252     | 2698.12500  | 185.98920   | 88.4731 |
| 2    | 15.497       | BB   | 0.2910     | 351.52969   | 18.72474    | 11.5269 |

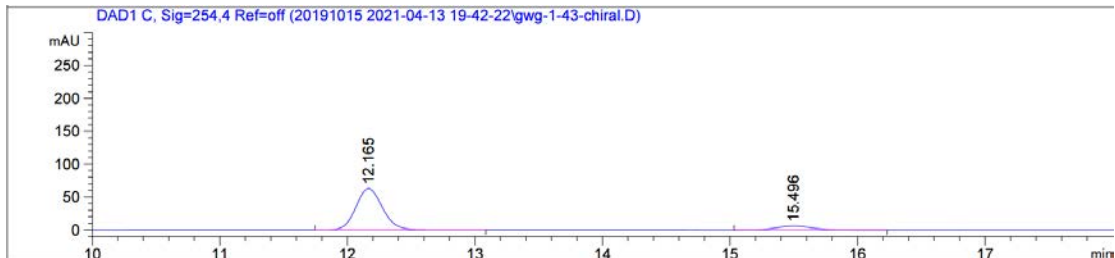

| Peak | RetTime[min] | Type | Width[min] | Area[mAu*s] | Height[mAU] | Area[%] |
|------|--------------|------|------------|-------------|-------------|---------|
| 1    | 12.165       | BB   | 0.2248     | 909.48560   | 62.86038    | 88.4258 |
| 2    | 15.496       | BB   | 0.2938     | 119.04402   | 6.31809     | 11.5742 |

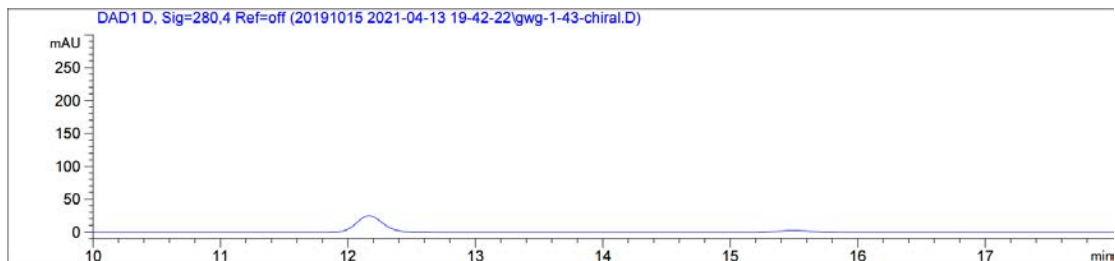

End of Report

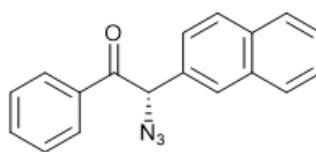

2q

enantioenriched

S-280



Sample Name: gwg-1-98-racemic

HPLC Condition: ODH, *n*-Hexane/*i*PrOH = 97:3, 1.0 mL/min

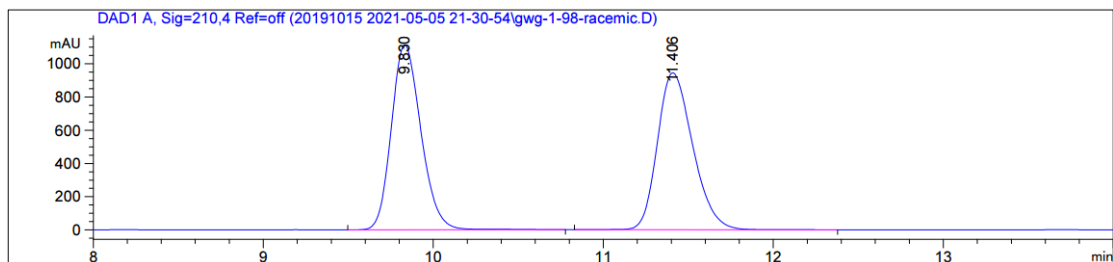

| Peak | RetTime[min] | Type | Width[min] | Area[mAu*s] | Height[mAU] | Area[%] |
|------|--------------|------|------------|-------------|-------------|---------|
| 1    | 9.830        | BB   | 0.1871     | 1.34759e4   | 1114.00635  | 49.7018 |
| 2    | 11.406       | BB   | 0.2244     | 1.36376e4   | 944.70026   | 50.2982 |

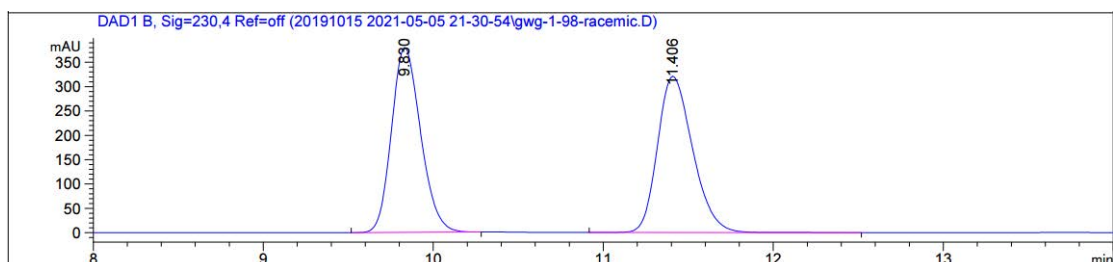

| Peak | RetTime[min] | Type | Width[min] | Area[mAu*s] | Height[mAU] | Area[%] |
|------|--------------|------|------------|-------------|-------------|---------|
| 1    | 9.830        | BB   | 0.1851     | 4525.84668  | 379.67108   | 49.5618 |
| 2    | 11.406       | BB   | 0.2235     | 4605.88330  | 320.75357   | 50.4382 |

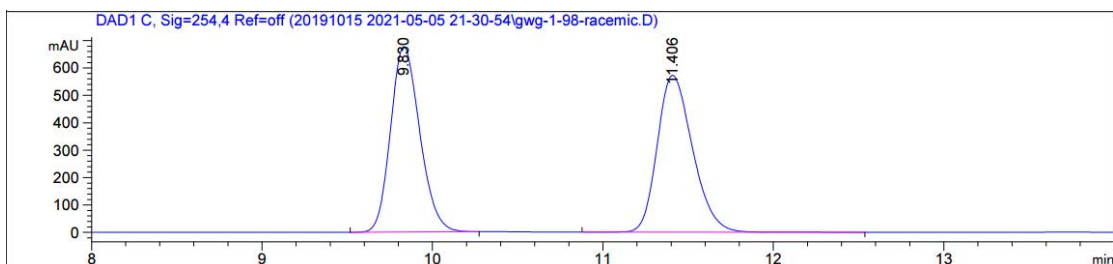

| Peak | RetTime[min] | Type | Width[min] | Area[mAu*s] | Height[mAU] | Area[%] |
|------|--------------|------|------------|-------------|-------------|---------|
| 1    | 9.830        | BB   | 0.1851     | 8071.86914  | 677.09534   | 49.5510 |
| 2    | 11.406       | BB   | 0.2235     | 8218.15234  | 572.52954   | 50.4490 |

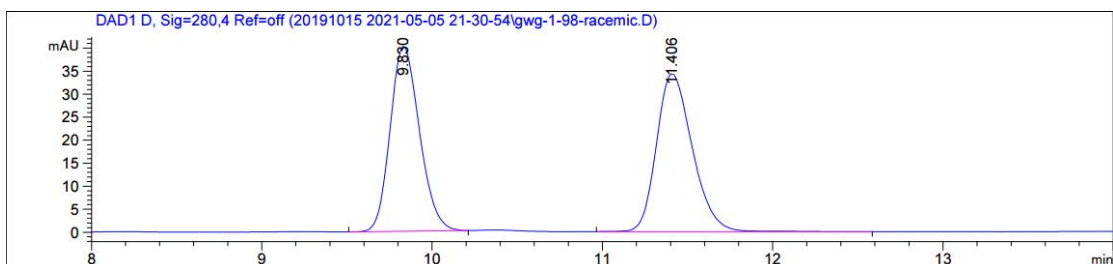

| Peak | RetTime[min] | Type | Width[min] | Area[mAu*s] | Height[mAU] | Area[%] |
|------|--------------|------|------------|-------------|-------------|---------|
| 1    | 9.830        | BB   | 0.1859     | 481.83469   | 40.18430    | 49.0166 |
| 2    | 11.406       | BB   | 0.2264     | 501.16901   | 34.31062    | 50.9834 |

End of Report

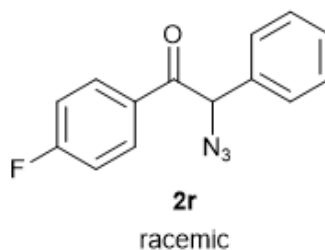

Sample Name: gwg-1-98-enantioenriched

HPLC Condition: ODH, *n*-Hexane/*i*PrOH = 97:3, 1.0 mL/min

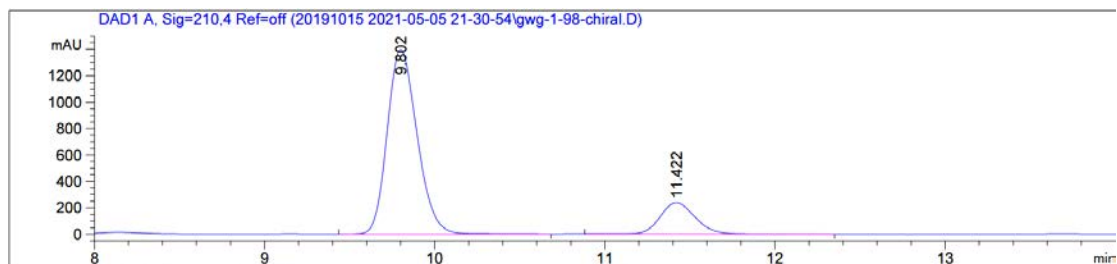

| Peak | RetTime[min] | Type | Width[min] | Area[mAu*s] | Height[mAU] | Area[%] |
|------|--------------|------|------------|-------------|-------------|---------|
| 1    | 9.802        | BB   | 0.1902     | 1.70337e4   | 1397.91956  | 83.3647 |
| 2    | 11.422       | BB   | 0.2201     | 3399.04932  | 238.75194   | 16.6353 |

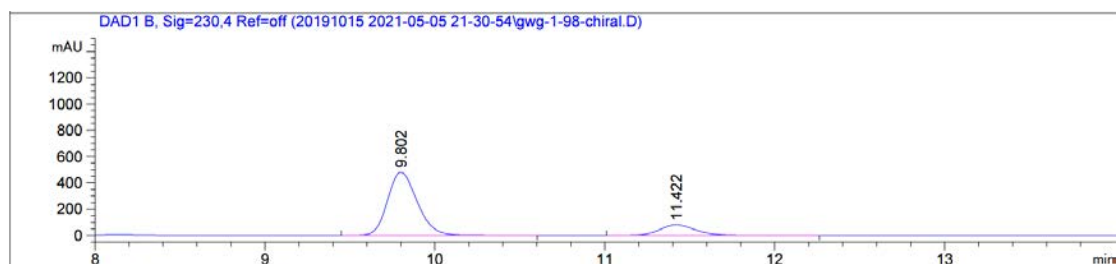

| Peak | RetTime[min] | Type | Width[min] | Area[mAu*s] | Height[mAU] | Area[%] |
|------|--------------|------|------------|-------------|-------------|---------|
| 1    | 9.802        | BB   | 0.1864     | 5798.85889  | 481.94672   | 83.6837 |
| 2    | 11.422       | BB   | 0.2191     | 1130.63684  | 79.91781    | 16.3163 |

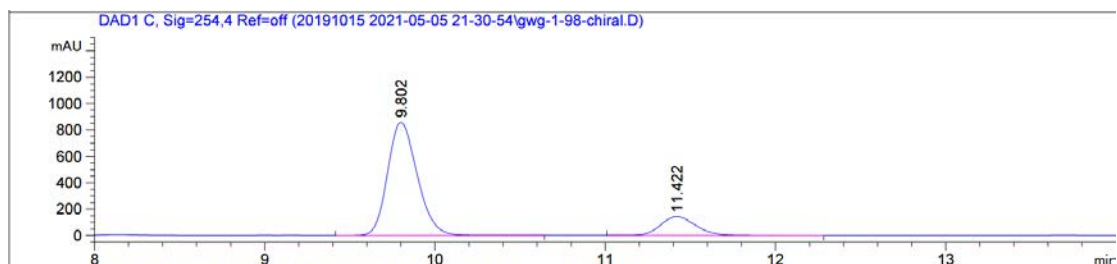

| Peak | RetTime[min] | Type | Width[min] | Area[mAu*s] | Height[mAU] | Area[%] |
|------|--------------|------|------------|-------------|-------------|---------|
| 1    | 9.802        | BB   | 0.1866     | 1.03469e4   | 858.86169   | 83.6700 |
| 2    | 11.422       | BB   | 0.2190     | 2019.41943  | 142.82462   | 16.3300 |

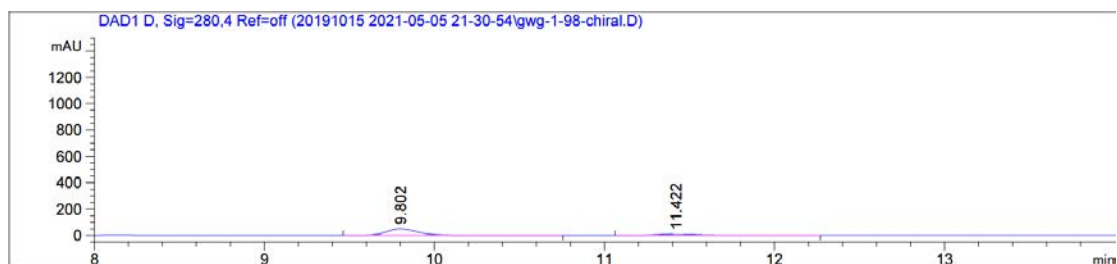

| Peak | RetTime[min] | Type | Width[min] | Area[mAu*s] | Height[mAU] | Area[%] |
|------|--------------|------|------------|-------------|-------------|---------|
| 1    | 9.802        | BB   | 0.1885     | 620.61389   | 50.80875    | 83.0422 |
| 2    | 11.422       | BB   | 0.2234     | 126.73378   | 8.72981     | 16.9578 |

End of Report

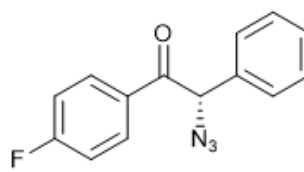

S-  
enantioenriched

Sample Name: gwg-3-111-racemic

HPLC Condition: IC, *n*-Hexane/*i*PrOH = 95:5, 1.0 mL/min

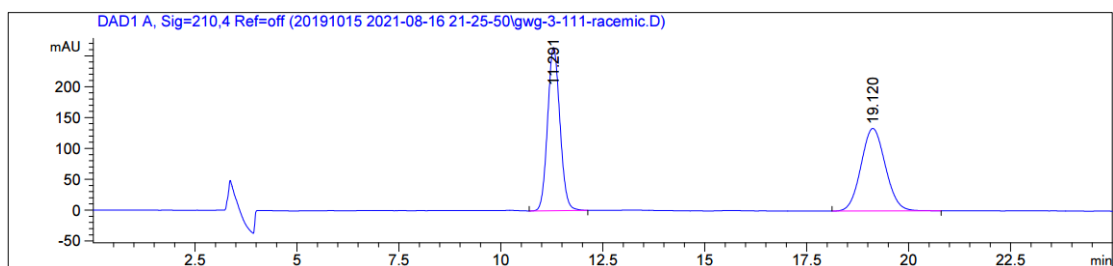

| Peak | RetTime[min] | Type | Width[min] | Area[mAu*s] | Height[mAU] | Area[%] |
|------|--------------|------|------------|-------------|-------------|---------|
| 1    | 11.291       | BB   | 0.3298     | 5570.95068  | 264.46167   | 50.0996 |
| 2    | 19.120       | BB   | 0.6521     | 5548.79639  | 133.72734   | 49.9004 |

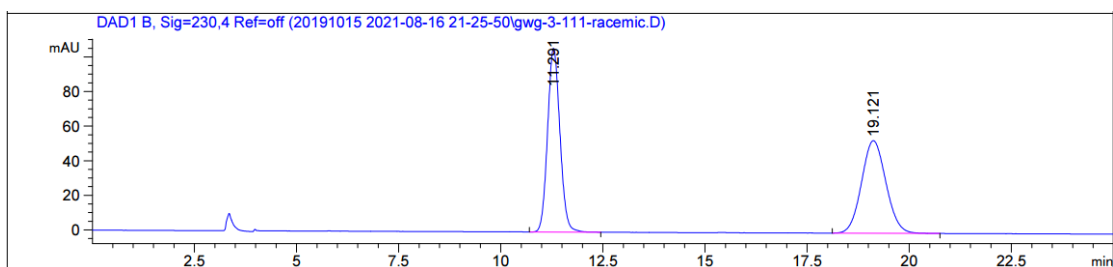

| Peak | RetTime[min] | Type | Width[min] | Area[mAu*s] | Height[mAU] | Area[%] |
|------|--------------|------|------------|-------------|-------------|---------|
| 1    | 11.291       | BB   | 0.3275     | 2235.96362  | 106.24183   | 50.1587 |
| 2    | 19.121       | BB   | 0.6444     | 2221.81738  | 53.51153    | 49.8413 |

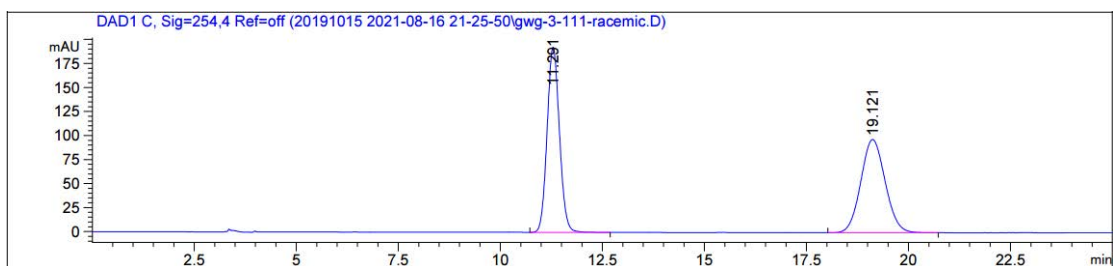

| Peak | RetTime[min] | Type | Width[min] | Area[mAu*s] | Height[mAU] | Area[%] |
|------|--------------|------|------------|-------------|-------------|---------|
| 1    | 11.291       | BB   | 0.3249     | 4047.90723  | 192.83478   | 50.1326 |
| 2    | 19.121       | BB   | 0.6482     | 4026.49194  | 97.02424    | 49.8674 |

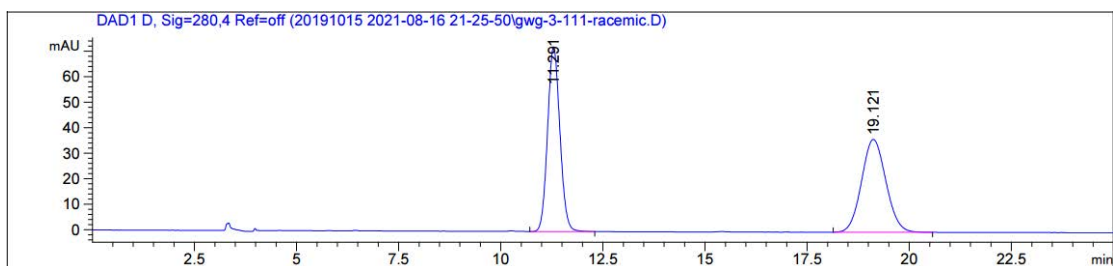

| Peak | RetTime[min] | Type | Width[min] | Area[mAu*s] | Height[mAU] | Area[%] |
|------|--------------|------|------------|-------------|-------------|---------|
| 1    | 11.291       | BB   | 0.3248     | 1518.07654  | 72.35809    | 50.1605 |
| 2    | 19.121       | BB   | 0.6375     | 1508.36279  | 36.39727    | 49.8395 |

End of Report

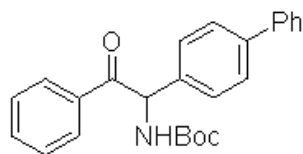

8

racemic  
S-283

Sample Name: gwg-3-111-enantioenriched

HPLC Condition: IC, *n*-Hexane/*i*PrOH = 95:5, 1.0 mL/min

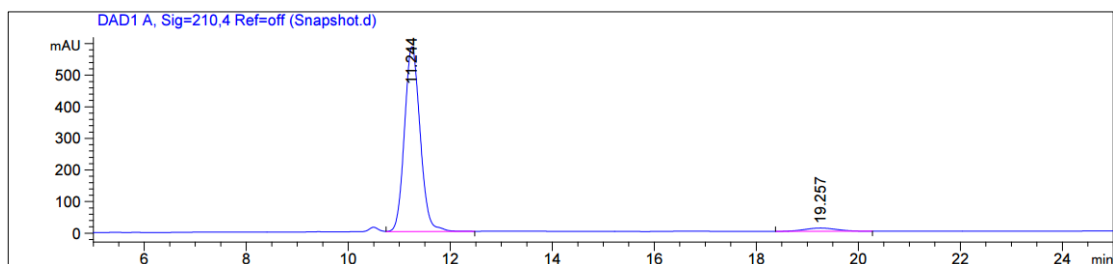

| Peak | RetTime[min] | Type | Width[min] | Area[mAu*s] | Height[mAU] | Area[%] |
|------|--------------|------|------------|-------------|-------------|---------|
| 1    | 11.244       | VB   | 0.3310     | 1.24881e4   | 585.01758   | 96.5272 |
| 2    | 19.257       | BB   | 0.6160     | 449.29156   | 10.31904    | 3.4728  |

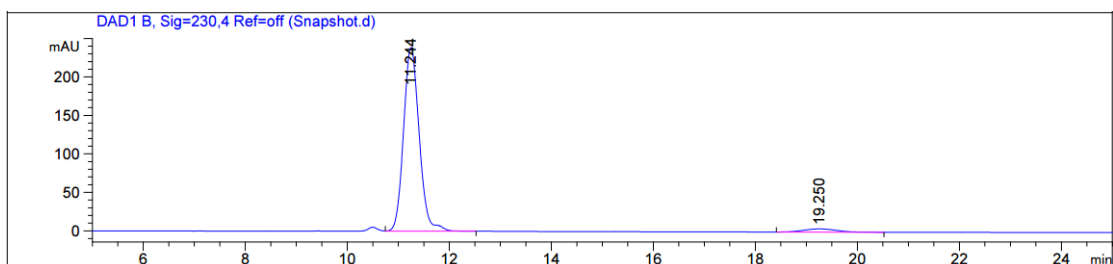

| Peak | RetTime[min] | Type | Width[min] | Area[mAu*s] | Height[mAU] | Area[%] |
|------|--------------|------|------------|-------------|-------------|---------|
| 1    | 11.244       | VB   | 0.3306     | 5087.86963  | 238.73804   | 96.5466 |
| 2    | 19.250       | BB   | 0.5579     | 181.98700   | 4.16407     | 3.4534  |

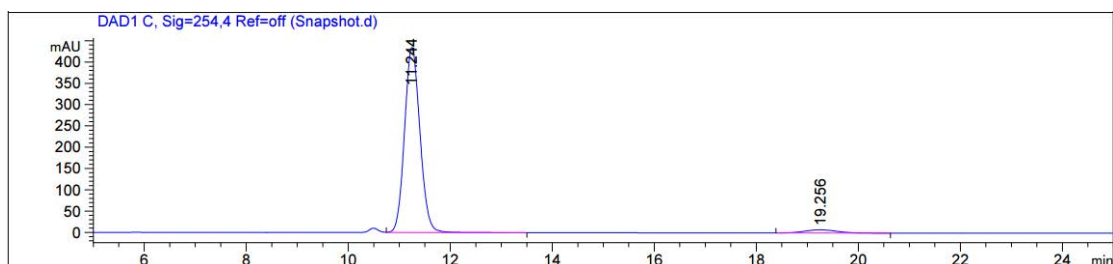

| Peak | RetTime[min] | Type | Width[min] | Area[mAu*s] | Height[mAU] | Area[%] |
|------|--------------|------|------------|-------------|-------------|---------|
| 1    | 11.244       | VB   | 0.3273     | 9138.28125  | 434.59372   | 96.5592 |
| 2    | 19.256       | BB   | 0.6125     | 325.63535   | 7.56076     | 3.4408  |

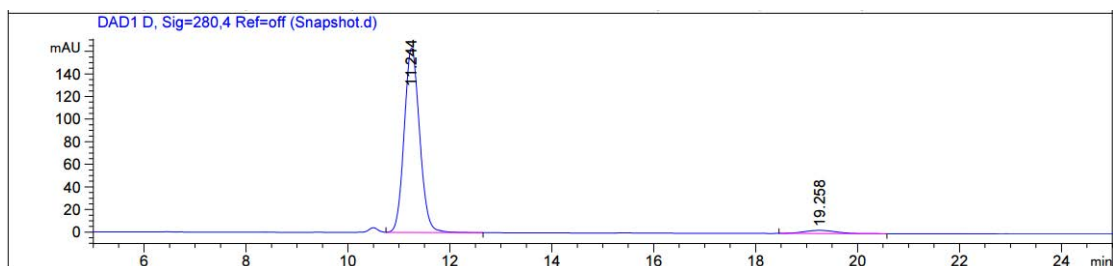

| Peak | RetTime[min] | Type | Width[min] | Area[mAu*s] | Height[mAU] | Area[%] |
|------|--------------|------|------------|-------------|-------------|---------|
| 1    | 11.244       | VB   | 0.3276     | 3433.52026  | 163.12679   | 96.6052 |
| 2    | 19.258       | BB   | 0.5286     | 120.65544   | 2.82308     | 3.3948  |

End of Report

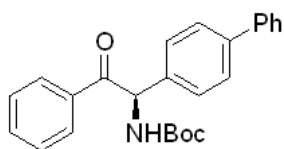

8  
enantioenriched  
S-284

Sample Name: gwg-3-155-racemic

HPLC Condition: ADH, *n*-Hexane/*i*PrOH = 85:15, 1.0 mL/min

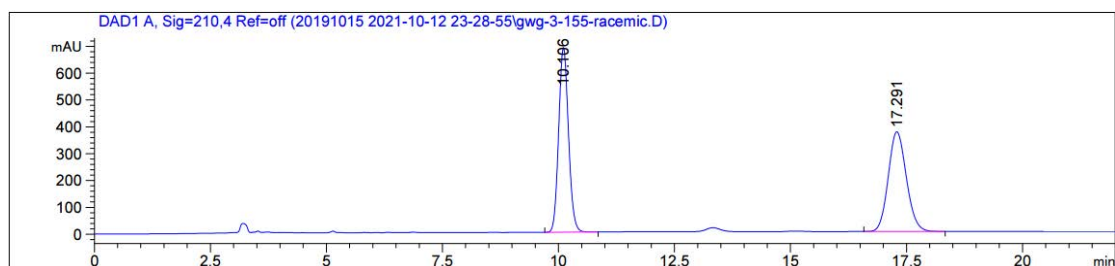

| Peak | RetTime[min] | Type | Width[min] | Area[mAu*s] | Height[mAU] | Area[%] |
|------|--------------|------|------------|-------------|-------------|---------|
| 1    | 10.106       | BB   | 0.2266     | 1.00618e4   | 688.26166   | 49.9883 |
| 2    | 17.291       | BB   | 0.4202     | 1.00665e4   | 371.43140   | 50.0117 |

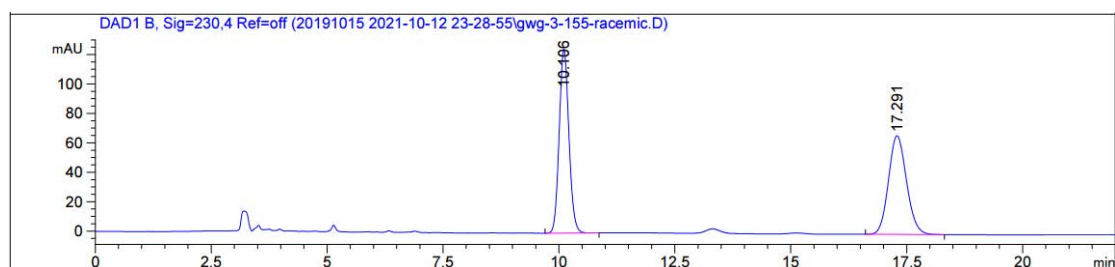

| Peak | RetTime[min] | Type | Width[min] | Area[mAu*s] | Height[mAU] | Area[%] |
|------|--------------|------|------------|-------------|-------------|---------|
| 1    | 10.106       | BB   | 0.2253     | 1814.52002  | 125.02724   | 50.0452 |
| 2    | 17.291       | BB   | 0.4191     | 1811.24402  | 67.07168    | 49.9548 |

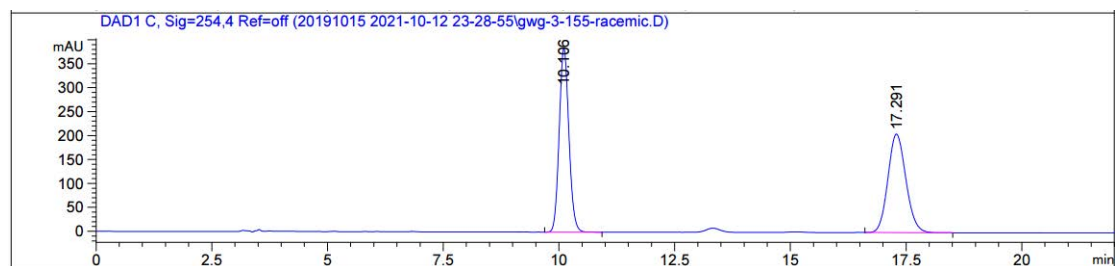

| Peak | RetTime[min] | Type | Width[min] | Area[mAu*s] | Height[mAU] | Area[%] |
|------|--------------|------|------------|-------------|-------------|---------|
| 1    | 10.106       | BB   | 0.2253     | 5587.44824  | 385.12701   | 50.1401 |
| 2    | 17.291       | BB   | 0.4169     | 5556.22217  | 205.87775   | 49.8599 |

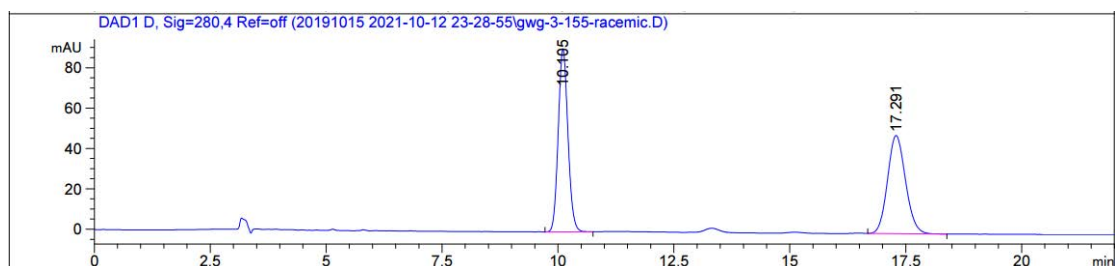

| Peak | RetTime[min] | Type | Width[min] | Area[mAu*s] | Height[mAU] | Area[%] |
|------|--------------|------|------------|-------------|-------------|---------|
| 1    | 10.105       | BB   | 0.2253     | 1316.55640  | 90.71405    | 50.1318 |
| 2    | 17.291       | BB   | 0.4185     | 1309.63330  | 48.58440    | 49.8682 |

End of Report

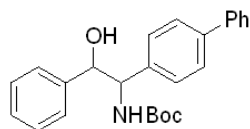

9

racemic

S-285

Sample Name: gwg-3-155-enantioenriched

HPLC Condition: ADH, *n*-Hexane/*i*PrOH = 85:15, 1.0 mL/min

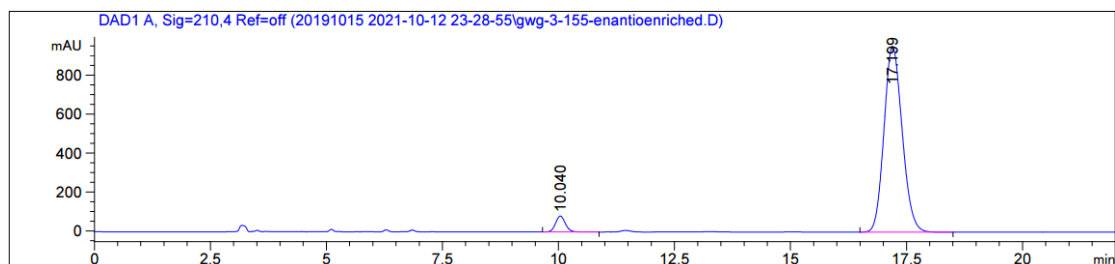

| Peak | RetTime[min] | Type | Width[min] | Area[mAu*s] | Height[mAU] | Area[%] |
|------|--------------|------|------------|-------------|-------------|---------|
| 1    | 10.040       | BB   | 0.2254     | 1199.77747  | 81.64992    | 4.4138  |
| 2    | 17.199       | BB   | 0.4240     | 2.59824e4   | 953.29797   | 95.5862 |

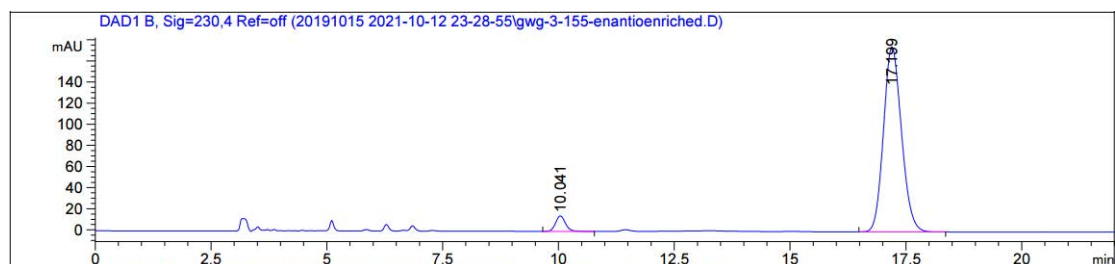

| Peak | RetTime[min] | Type | Width[min] | Area[mAu*s] | Height[mAU] | Area[%] |
|------|--------------|------|------------|-------------|-------------|---------|
| 1    | 10.041       | BB   | 0.2276     | 217.04330   | 14.58637    | 4.3973  |
| 2    | 17.199       | BB   | 0.4166     | 4718.78760  | 175.01804   | 95.6027 |

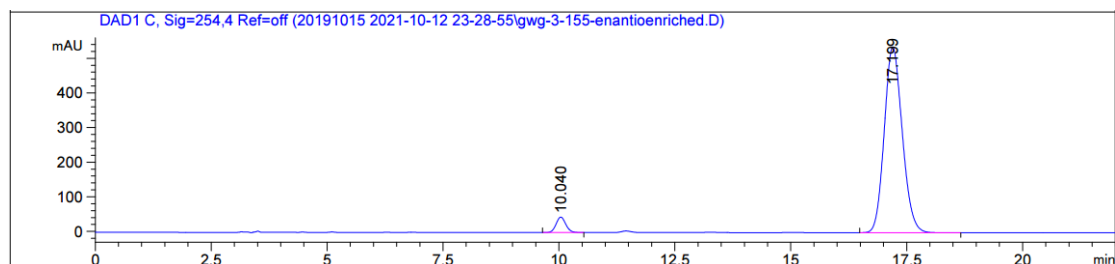

| Peak | RetTime[min] | Type | Width[min] | Area[mAu*s] | Height[mAU] | Area[%] |
|------|--------------|------|------------|-------------|-------------|---------|
| 1    | 10.040       | BB   | 0.2239     | 648.34186   | 44.51392    | 4.2908  |
| 2    | 17.199       | BB   | 0.4165     | 1.44616e4   | 536.49506   | 95.7092 |

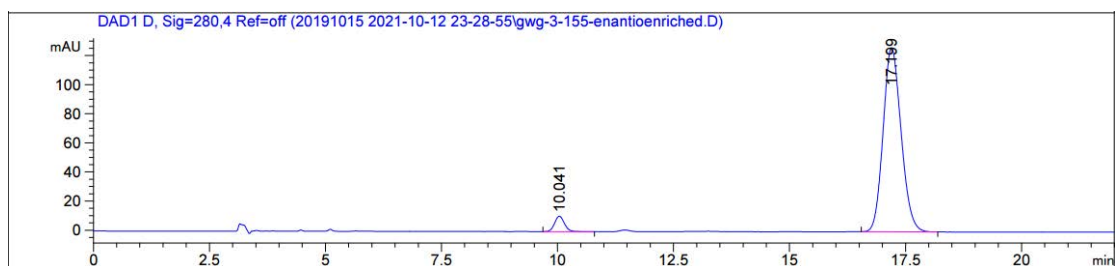

| Peak | RetTime[min] | Type | Width[min] | Area[mAu*s] | Height[mAU] | Area[%] |
|------|--------------|------|------------|-------------|-------------|---------|
| 1    | 10.041       | BB   | 0.2271     | 155.12466   | 10.58029    | 4.3516  |
| 2    | 17.199       | BB   | 0.4164     | 3409.64160  | 126.50976   | 95.6484 |

End of Report

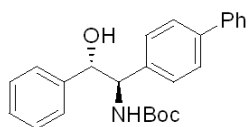

9

enantioenriched

S-286

Sample Name: gwg-3-114-racemic

HPLC Condition: ADH, *n*-Hexane/*i*PrOH = 80:20, 1.0 mL/min

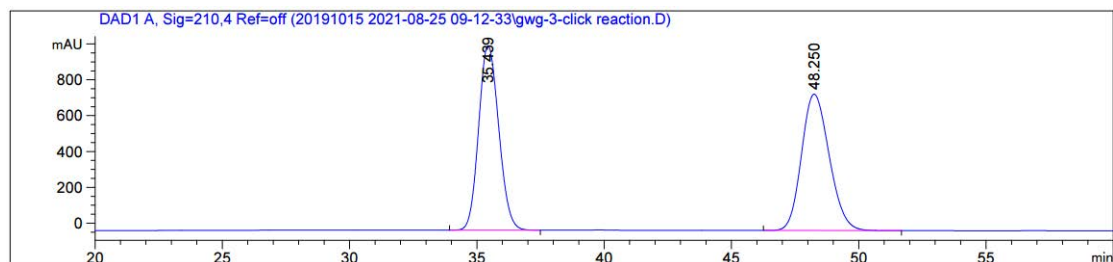

| Peak | RetTime[min] | Type | Width[min] | Area[mAu*s] | Height[mAU] | Area[%] |
|------|--------------|------|------------|-------------|-------------|---------|
| 1    | 35.439       | BB   | 0.8651     | 5.65630e4   | 1029.29639  | 49.5387 |
| 2    | 48.250       | BB   | 1.1755     | 5.76164e4   | 760.85791   | 50.4613 |

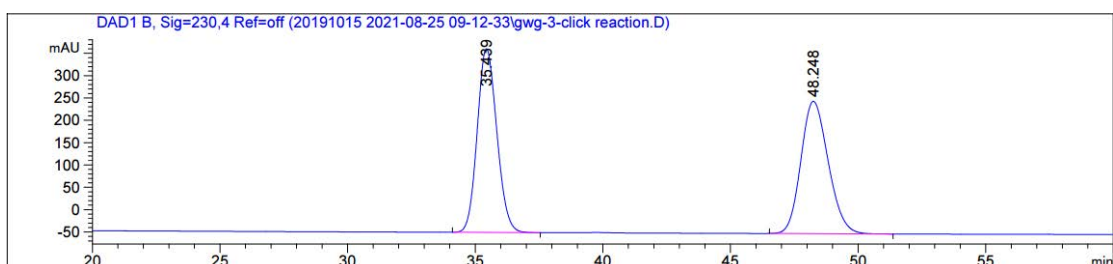

| Peak | RetTime[min] | Type | Width[min] | Area[mAu*s] | Height[mAU] | Area[%] |
|------|--------------|------|------------|-------------|-------------|---------|
| 1    | 35.439       | BB   | 0.8316     | 2.19696e4   | 411.04282   | 49.9256 |
| 2    | 48.248       | BB   | 1.1438     | 2.20350e4   | 296.22345   | 50.0744 |

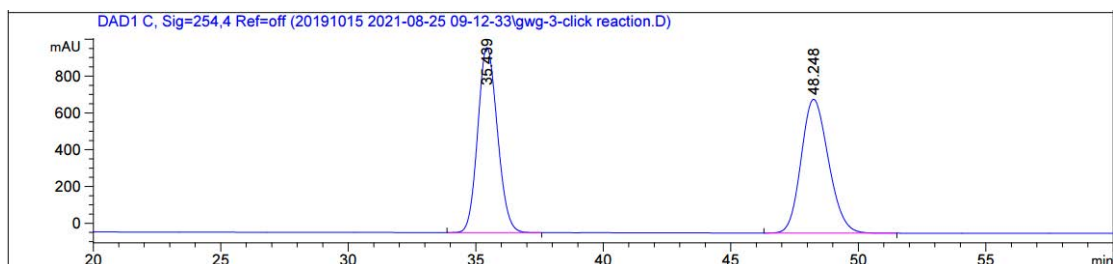

| Peak | RetTime[min] | Type | Width[min] | Area[mAu*s] | Height[mAU] | Area[%] |
|------|--------------|------|------------|-------------|-------------|---------|
| 1    | 35.439       | BB   | 0.8378     | 5.39580e4   | 1006.00275  | 49.8936 |
| 2    | 48.248       | BB   | 1.1576     | 5.41883e4   | 727.03790   | 50.1064 |

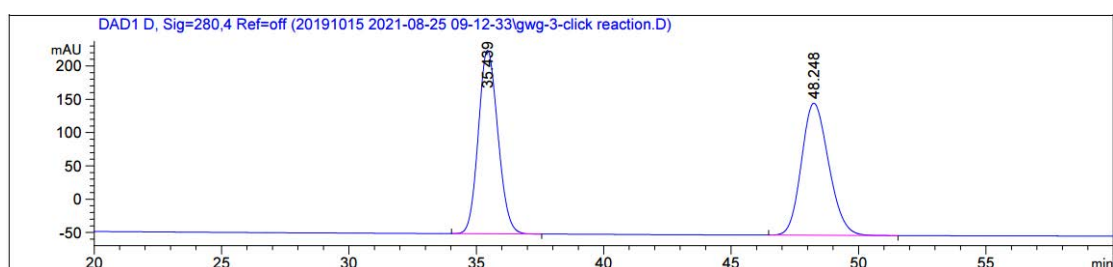

| Peak | RetTime[min] | Type | Width[min] | Area[mAu*s] | Height[mAU] | Area[%] |
|------|--------------|------|------------|-------------|-------------|---------|
| 1    | 35.439       | BB   | 0.8315     | 1.47183e4   | 275.39395   | 49.9441 |
| 2    | 48.248       | BB   | 1.1441     | 1.47513e4   | 198.24451   | 50.0559 |

End of Report

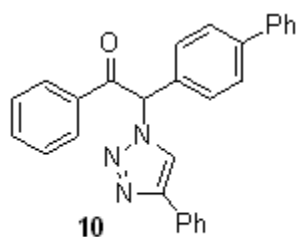

10  
racemic

Sample Name: gwg-3-114-enantioenriched

HPLC Condition: ADH, *n*-Hexane/*i*PrOH = 80:20, 1.0 mL/min

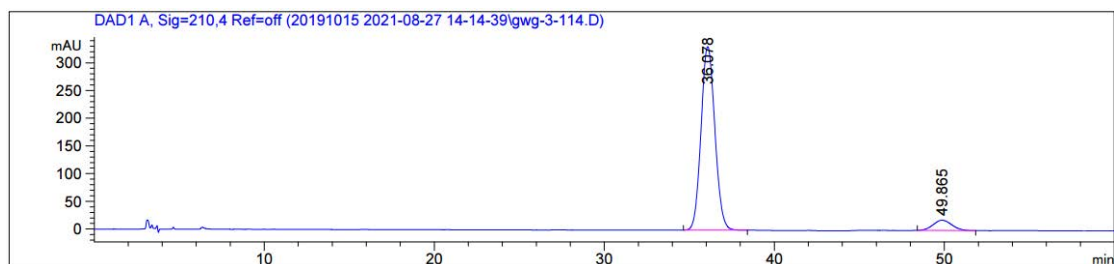

| Peak | RetTime[min] | Type | Width[min] | Area[mAu*s] | Height[mAU] | Area[%] |
|------|--------------|------|------------|-------------|-------------|---------|
| 1    | 36.078       | BB   | 0.8748     | 1.87056e4   | 331.27939   | 93.0017 |
| 2    | 49.865       | BB   | 0.9043     | 1407.58472  | 18.52926    | 6.9983  |

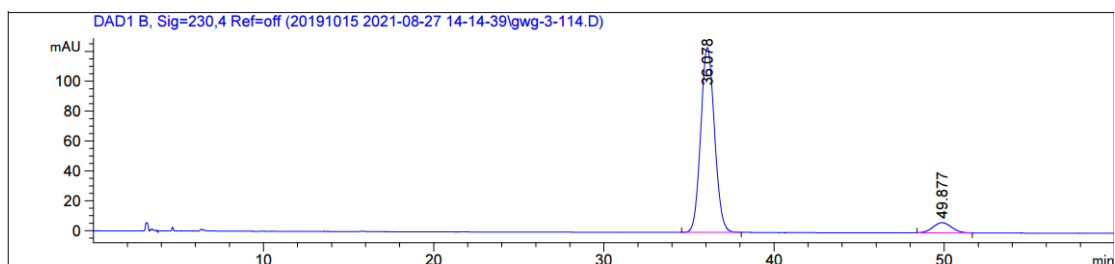

| Peak | RetTime[min] | Type | Width[min] | Area[mAu*s] | Height[mAU] | Area[%] |
|------|--------------|------|------------|-------------|-------------|---------|
| 1    | 36.078       | BB   | 0.8724     | 6963.04785  | 123.75789   | 93.1159 |
| 2    | 49.877       | BB   | 0.8884     | 514.78400   | 6.80636     | 6.8841  |

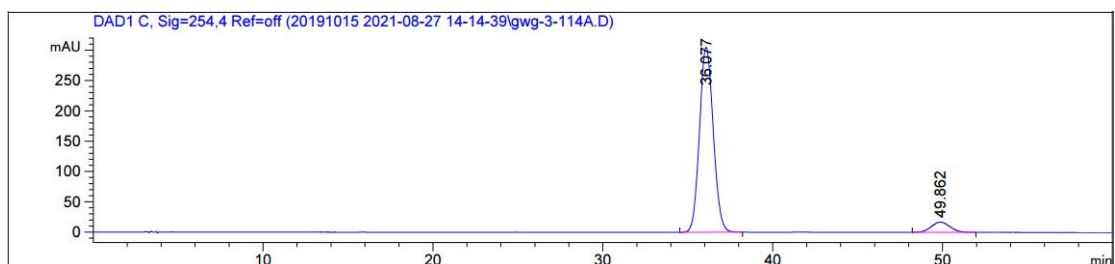

| Peak | RetTime[min] | Type | Width[min] | Area[mAu*s] | Height[mAU] | Area[%] |
|------|--------------|------|------------|-------------|-------------|---------|
| 1    | 36.077       | BB   | 0.8743     | 1.71613e4   | 305.07858   | 92.9823 |
| 2    | 49.862       | BB   | 0.9841     | 1295.23450  | 16.89993    | 7.0177  |

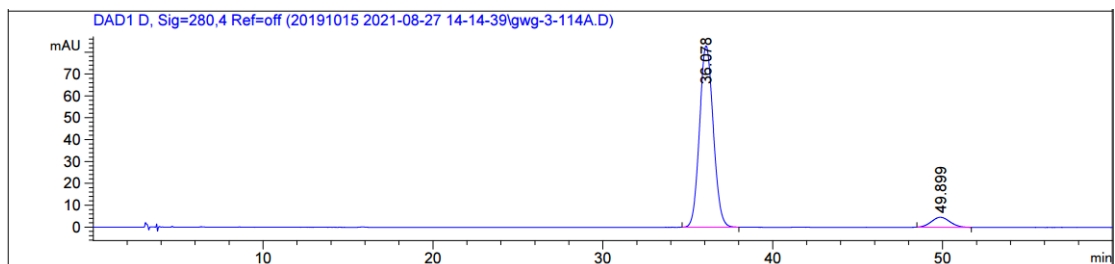

| Peak | RetTime[min] | Type | Width[min] | Area[mAu*s] | Height[mAU] | Area[%] |
|------|--------------|------|------------|-------------|-------------|---------|
| 1    | 36.078       | BB   | 0.8641     | 4662.72803  | 82.90699    | 93.1309 |
| 2    | 49.899       | BB   | 0.8998     | 343.90897   | 4.55016     | 6.8691  |

End of Report

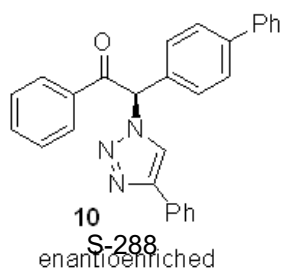

Supplement: d2sc03552a1.pdf [file d2sc03552a1.pdf]
